# Supplementary material for: Dosage effect of Copy Number Variation in Epilepsy and ten regions of the human brain
Source: Research Square preprint supplement (doi:10.21203/rs.3.rs-6130694/v1), 2025-04-15
Supplement: Supplementary file 1 [file 4e050f7f13e29da9d9546300.xlsx]

## Sheet: CNVs
Supplementary table 2. Clinvar database results for GNB1. CNV and SNP annotations for the GNB1 gene in the clinvar database.
Name	Gene(s)	Protein change	Condition(s)	Accession	GRCh37Chromosome	GRCh37Location	GRCh38Chromosome	GRCh38Location	VariationID	AlleleID(s)	dbSNP ID	Canonical SPDI	Variant type	Molecular consequence	Germline classification	Germline date last evaluated	Germline review status	Somatic clinical impact	Somatic clinical impact date last evaluated	Somatic clinical impact review status	Oncogenicity classification	Oncogenicity date last evaluated	Oncogenicity review status
chr1:909238-16736132 complex variant	RER1|RERE|RNF207|RNF223|SDF4|SLC35E2B|SLC45A1|SMIM1|SPATA21|TMEM51|TMEM52|TMEM82|TMEM88B|TNFRSF14|RPL22|RSC1A1|SCNN1D|AADACL3|AADACL4|ACAP3|ACOT7|ACTRT2|AGMAT|AGRN|AGTRAP|AJAP1|ANGPTL7|ANKRD65|ARHGEF16|ARHGEF19|ATAD3A|ATAD3B|ATAD3C|AURKAIP1|B3GALT6|C1QTNF12|C1orf127|C1orf159|C1orf167|C1orf174|CA6|CALML6|CAMTA1|CASP9|CELA2B|CASZ1|CCDC27|CCNL2|CDK11A|CDK11B|CELA2A|CENPS|CENPS-CORT|CEP104|CFAP107|CF…		Breast ductal adenocarcinoma	VCV000221357	1	909238 - 16736132			221357	223086			Complex		Uncertain significance	Jul 20, 2015	no assertion criteria provided
Single allele	IGSF21|IL22RA1|INTS11|ISG15|KAZN|KCNAB2|KDM1A|LDLRAD2|LACTBL1|LINC01783|KLHDC7A|KIF17|KIF1B|KIAA2013|KLHL21|AADACL3|AADACL4|ACAP3|ACOT7|ACTL8|ACTRT2|AGMAT|AGRN|AGTRAP|AJAP1|AKR7A2|AKR7A3|AKR7L|ALDH4A1|ALPL|ANGPTL7|ANKRD65|ARHGEF10L|ARHGEF16|ARHGEF19|ASAP3|ATAD3A|ATAD3B|ATAD3C|ATP13A2|AURKAIP1|B3GALT6|C1QA|C1QB|C1QC|C1QTNF12|C1orf127|C1orf159|C1orf167|C1orf174|CA6|CALML6|CAMK2N1|CAMTA1|CAPZB|CASP9…		Breast ductal adenocarcinoma	VCV000221334	1	909238 - 24706269			221334	223063			Complex		Uncertain significance	Jul 20, 2015	no assertion criteria provided
GRCh38/hg38 1p36.33-35.1(chr1:99125-34026935)x3	A2ML1-AS2|A3GALT2|AADACL3|AADACL4|ACAP3|ACOT7|ACTL8|ACTRT2|ADGRB2|AGMAT|AGRN|AGTRAP|AHDC1|AJAP1|AK2|AKR7A2|AKR7A3|AKR7L|ALDH4A1|ALPL|ANGPTL7|ANKRD65|ANKRD65-AS1|ARHGEF10L|ARHGEF16|ARHGEF19|ARID1A|ASAP3|ATAD3A|ATAD3B|ATAD3C|ATP13A2|ATP5IF1|AUNIP|LOC129929445|LOC129929446|LOC129929447|LOC129929448|LOC129929449|LOC129929450|LOC129929451|LOC129929452|LOC129929453|LOC129929454|LOC129929455|LOC12992945…		Trisomy 12p	VCV002664871			1	99125 - 34026935	2664871	2832320			copy number gain		Pathogenic	Dec 12, 2023	criteria provided, single submitter
GRCh38/hg38 1p36.33-36.32(chr1:792758-5006311)x3	LINC01786|LINC02593|LINC02780|LOC100288175|LOC100996583|LOC105378586|LOC105378604|LOC105378948|LOC106783496|LOC107985728|LOC108281140|LOC110120751|LOC110121223|LOC110599576|LOC112268219|LOC112577469|LOC112577524|LOC112577525|LOC112577578|LOC112577579|LOC112577581|LOC115801415|LOC120851201|LOC121677382|LOC121677383|LOC121677384|LOC121967042|LOC121967043|LOC121967044|LOC121967045|LOC121967046|LOC12…		See cases	VCV000058036	1	728138 - 5066371	1	792758 - 5006311	58036	72631			copy number gain		Pathogenic	Aug 12, 2011	criteria provided, single submitter
GRCh38/hg38 1p36.33-36.32(chr1:821713-3928354)x3	LOC129929084|LOC129929085|LOC129929086|LOC129929087|LOC129929088|LOC129929089|LOC129929090|LOC129929091|LOC129929092|LOC129929093|LOC129929094|LOC129929095|LOC129929096|LOC129929097|LOC129929098|LOC129929099|LOC129929100|LOC129929101|LOC129929102|LOC129929103|LOC129929104|LOC129929105|LOC129929106|LOC129929107|LOC129929108|LOC129929109|LOC129929110|LOC129929111|LOC129929112|LOC129929113|LOC129929…		See cases	VCV000149107	1	757093 - 3823583	1	821713 - 3928354	149107	158858			copy number gain		Likely pathogenic	Jun 1, 2012	no assertion criteria provided
GRCh38/hg38 1p36.33-36.32(chr1:821713-2463016)x4	ACAP3|AGRN|ANKRD65|ANKRD65-AS1|ATAD3A|ATAD3B|ATAD3C|AURKAIP1|B3GALT6|C1QTNF12|C1orf159|CALML6|CCNL2|CDK11A|CDK11B|CFAP74|CPTP|DVL1|FAAP20|FAM41C|FNDC10|GABRD|GNB1|GNB1-DT|HES4|INTS11|ISG15|KLHL17|LINC00115|LINC01128|LINC01342|LINC01770|LINC01786|LINC02593|LOC100288175|LOC105378586|LOC105378948|LOC106783496|LOC107985728|LOC110599576|LOC112268219|LOC112577469|LOC112577524|LOC112577525|LOC115801415|…		See cases	VCV000148829	1	757093 - 2394455	1	821713 - 2463016	148829	158580			copy number gain		Uncertain significance	Apr 5, 2012	no assertion criteria provided
GRCh38/hg38 1p36.33-36.32(chr1:826553-4719105)x3	ACAP3|ACTRT2|AGRN|AJAP1|ANKRD65|ANKRD65-AS1|ARHGEF16|ATAD3A|ATAD3B|ATAD3C|AURKAIP1|B3GALT6|C1QTNF12|C1orf159|C1orf174|CALML6|CCDC27|CCNL2|CDK11A|CDK11B|CEP104|CFAP74|CPTP|DFFB|DVL1|FAAP20|FAM41C|FNDC10|GABRD|GNB1|GNB1-DT|HES4|HES5|INTS11|ISG15|KLHL17|LINC00115|LINC01128|LINC01134|LINC01342|LINC01345|LINC01346|LINC01646|LINC01770|LINC01777|LINC01786|LINC02593|LINC02780|LOC100288175|LOC100996583|LO…		See cases	VCV000058037	1	761933 - 4779165	1	826553 - 4719105	58037	72632			copy number gain		Pathogenic	Aug 12, 2011	criteria provided, single submitter
GRCh38/hg38 1p36.33-36.31(chr1:844353-5827192)x3	ACAP3|ACTRT2|AGRN|AJAP1|ANKRD65|ANKRD65-AS1|ARHGEF16|ATAD3A|ATAD3B|ATAD3C|AURKAIP1|B3GALT6|C1QTNF12|C1orf159|C1orf174|CALML6|CCDC27|CCNL2|CDK11A|CDK11B|CEP104|CFAP74|CPTP|DFFB|DVL1|FAAP20|FAM41C|FNDC10|GABRD|GNB1|GNB1-DT|HES4|HES5|INTS11|ISG15|KLHL17|LINC01128|LINC01134|LINC01342|LINC01345|LINC01346|LINC01646|LINC01770|LINC01777|LINC01786|LINC02593|LINC02780|LINC02782|LOC100288175|LOC100996583|LO…		See cases	VCV000145360	1	779733 - 5887252	1	844353 - 5827192	145360	155111			copy number gain		Pathogenic	Jul 30, 2010	no assertion criteria provided
GRCh38/hg38 1p36.33-36.32(chr1:872305-2642603)x3	ACAP3|AGRN|ANKRD65|ANKRD65-AS1|ATAD3A|ATAD3B|ATAD3C|AURKAIP1|B3GALT6|C1QTNF12|C1orf159|CALML6|CCNL2|CDK11A|CDK11B|CFAP74|CPTP|DVL1|FAAP20|FAM41C|FNDC10|GABRD|GNB1|GNB1-DT|HES4|HES5|INTS11|ISG15|KLHL17|LINC01342|LINC01770|LINC01786|LINC02593|LOC100288175|LOC100996583|LOC105378586|LOC105378948|LOC106783496|LOC107985728|LOC110599576|LOC112268219|LOC112577469|LOC112577524|LOC112577525|LOC115801415|LO…		See cases	VCV000058315	1	807685 - 2574042	1	872305 - 2642603	58315	72910			copy number gain		Pathogenic	Aug 12, 2011	criteria provided, single submitter
GRCh38/hg38 1p36.33-36.32(chr1:911300-3614487)x3	ACAP3|ACTRT2|AGRN|ANKRD65|ANKRD65-AS1|ARHGEF16|ATAD3A|ATAD3B|ATAD3C|AURKAIP1|B3GALT6|C1QTNF12|C1orf159|CALML6|CCNL2|CDK11A|CDK11B|CFAP74|CPTP|DVL1|FAAP20|FNDC10|GABRD|GNB1|GNB1-DT|HES4|HES5|INTS11|ISG15|KLHL17|LINC01342|LINC01770|LINC01786|LINC02593|LOC100288175|LOC100996583|LOC105378586|LOC105378604|LOC105378948|LOC106783496|LOC107985728|LOC108281140|LOC110120751|LOC110121223|LOC110599576|LOC112…		See cases	VCV000144176	1	846680 - 3531051	1	911300 - 3614487	144176	153927			copy number gain		Pathogenic	Oct 22, 2013	no assertion criteria provided
GRCh38/hg38 1p36.33(chr1:932163-1792271)x4	ACAP3|AGRN|ANKRD65|ANKRD65-AS1|ATAD3A|ATAD3B|ATAD3C|AURKAIP1|B3GALT6|C1QTNF12|C1orf159|CCNL2|CDK11A|CDK11B|CPTP|DVL1|FNDC10|GNB1|HES4|INTS11|ISG15|KLHL17|LINC01342|LINC01770|LINC01786|LOC100288175|LOC105378586|LOC105378948|LOC106783496|LOC110599576|LOC112577469|LOC115801415|LOC121677382|LOC121967042|LOC121967043|LOC121967044|LOC121967045|LOC121967046|LOC126805576|LOC126805577|LOC129388419|LOC1293…		See cases	VCV000145604	1	867543 - 1723710	1	932163 - 1792271	145604	155355			copy number gain		Likely benign	Dec 22, 2010	no assertion criteria provided
GRCh38/hg38 1p36.33-36.32(chr1:1330915-3743546)x3	LOC129929178|LOC129929179|LOC129929180|LOC129929181|LOC129929182|LOC129929183|LOC129929184|LOC129929185|LOC129929186|LOC129929187|LOC129929188|LOC129929189|LOC129929190|LOC129929191|LOC129929192|LOC129929193|LOC129929194|LOC129929195|LOC129929196|LOC129929197|LOC129929198|LOC129929199|LOC129929200|LOC132088605|LOC132088687|LOC132088688|LOC132088689|LOC132088690|LOC132088694|LOC132088704|LOC132088…		See cases	VCV000150863	1	1266295 - 3660110	1	1330915 - 3743546	150863	160614			copy number gain		Uncertain significance	May 3, 2012	no assertion criteria provided
GRCh38/hg38 1p36.33-36.32(chr1:1515661-2349832)x3	ATAD3A|CALML6|CDK11A|CDK11B|CFAP74|FAAP20|FNDC10|GABRD|GNB1|GNB1-DT|LOC105378586|LOC112268219|LOC112577524|LOC121677382|LOC121967044|LOC121967045|LOC121967046|LOC121967047|LOC121967048|LOC121967049|LOC126805578|LOC126805579|LOC129929134|LOC129929135|LOC129929136|LOC129929137|LOC129929138|LOC129929139|LOC129929140|LOC129929141|LOC129929142|LOC129929143|LOC129929144|LOC129929145|LOC129929146|LOC129…		See cases	VCV000154682	1	1451041 - 2281271	1	1515661 - 2349832	154682	164436			copy number gain		Uncertain significance	Dec 22, 2010	no assertion criteria provided
GRCh38/hg38 1p36.33-36.32(chr1:1756301-3649513)x4	ACTRT2|ARHGEF16|CALML6|CFAP74|FAAP20|GABRD|GNB1|GNB1-DT|HES5|LOC100996583|LOC105378604|LOC108281140|LOC110120751|LOC110121223|LOC112268219|LOC112577524|LOC112577525|LOC112577578|LOC112577579|LOC120851201|LOC121677383|LOC121967046|LOC121967047|LOC121967048|LOC121967049|LOC121967050|LOC121967051|LOC121967052|LOC124903827|LOC126805578|LOC126805579|LOC126805580|LOC126805581|LOC126805582|LOC126805583|…		See cases	VCV000150036	1	1687740 - 3566077	1	1756301 - 3649513	150036	159787			copy number gain		s	Apr 4, 2013	no assertion criteria provided
GRCh37/hg19 1p36.33(chr1:1800954-2052629)x3	CALML6|CFAP74|GABRD|GNB1|PRKCZ|TMEM52		not provided	VCV003242275	1	1800954 - 2052629			3242275	3401250			copy number gain		Uncertain significance	Oct 31, 2018	criteria provided, single submitter
GRCh37/hg19 1p36.33-36.32(chr1:849466-4529103)x3	ACAP3|ACTRT2|AGRN|ANKRD65|ARHGEF16|ATAD3A|ATAD3B|ATAD3C|AURKAIP1|B3GALT6|C1QTNF12|C1orf159|C1orf174|CALML6|CCDC27|CCNL2|CDK11A|CDK11B|CEP104|CFAP74|CPTP|DFFB|DVL1|FAAP20|FNDC10|GABRD|GNB1|HES4|HES5|INTS11|ISG15|KLHL17|LRRC47|MEGF6|MIB2|MIR200A|MIR200B|MIR429|MIR551A|MMEL1|MMP23B|MORN1|MRPL20|MXRA8|NADK|NOC2L|PANK4|PEX10|PLCH2|PLEKHN1|PRDM16|PRKCZ|PRXL2B|PUSL1|RER1|RNF223|SAMD11|SCNN1D|SDF4|SKI|SL…		not specified	VCV003063255	1	849466 - 4529103			3063255	3223471			copy number gain		Pathogenic		criteria provided, single submitter
GRCh37/hg19 1p36.33-36.32(chr1:1687675-3638712)x3	ACTRT2|ARHGEF16|CALML6|CFAP74|FAAP20|GABRD|GNB1|HES5|MEGF6|MIR551A|MMEL1|MORN1|NADK|PANK4|PEX10|PLCH2|PRDM16|PRKCZ|PRXL2B|RER1|SKI|TMEM52|TNFRSF14|TP73|TPRG1L|TTC34|WRAP73		not provided	VCV002685792	1	1687675 - 3638712			2685792	2846827			copy number gain		Uncertain significance	Nov 17, 2022	criteria provided, single submitter
GRCh37/hg19 1p36.33(chr1:1616990-1890118)x3	CALML6|CDK11A|CFAP74|GNB1|NADK|SLC35E2A|SLC35E2B|TMEM52		not provided	VCV002685791	1	1616990 - 1890118			2685791	2846826			copy number gain		Uncertain significance	Jan 17, 2023	criteria provided, single submitter
GRCh37/hg19 1p36.33-36.32(chr1:1129319-3615916)x3	MIR551A|PANK4|MMP23B|MRPL20|NADK|PEX10|MORN1|MMEL1|MXRA8|ACAP3|ACTRT2|ANKRD65|ARHGEF16|ATAD3A|ATAD3B|ATAD3C|AURKAIP1|B3GALT6|C1QTNF12|CALML6|CCNL2|CDK11A|CDK11B|CFAP74|CPTP|DVL1|FAAP20|FNDC10|GABRD|GNB1|HES5|INTS11|MEGF6|MIB2|PLCH2|PRDM16|PRKCZ|PRXL2B|PUSL1|RER1|SCNN1D|SDF4|SKI|SLC35E2A|SLC35E2B|SSU72|TAS1R3|TMEM240|TMEM52|TMEM88B|TNFRSF14|TNFRSF18|TNFRSF4|TP73|TPRG1L|TTC34|TTLL10|UBE2J2|VWA1|WRA…		not provided	VCV002685789	1	1129319 - 3615916			2685789	2846824			copy number gain		Pathogenic	Nov 17, 2022	criteria provided, single submitter
GRCh37/hg19 1p36.33-36.32(chr1:1089596-2607016)x3	MMEL1|PEX10|PLCH2|PRKCZ|PRXL2B|PUSL1|RER1|SCNN1D|MORN1|MRPL20|MXRA8|NADK|PANK4|MMP23B|ACAP3|ANKRD65|ATAD3A|ATAD3B|ATAD3C|AURKAIP1|B3GALT6|C1QTNF12|CALML6|CCNL2|CDK11A|CDK11B|CFAP74|CPTP|DVL1|FAAP20|FNDC10|GABRD|GNB1|HES5|INTS11|MIB2|MIR200A|MIR200B|MIR429|SDF4|SKI|SLC35E2A|SLC35E2B|SSU72|TAS1R3|TMEM240|TMEM52|TMEM88B|TNFRSF14|TNFRSF18|TNFRSF4|TTC34|TTLL10|UBE2J2|VWA1		not provided	VCV002685787	1	1089596 - 2607016			2685787	2846822			copy number gain		Uncertain significance	Aug 26, 2022	criteria provided, single submitter
GRCh37/hg19 1p36.33(chr1:1732310-2040647)x3	CALML6|CFAP74|GABRD|GNB1|PRKCZ|TMEM52		not provided	VCV001809254	1	1732310 - 2040647			1809254	1866258			copy number gain		Uncertain significance	Sep 20, 2021	criteria provided, single submitter
GRCh37/hg19 1p36.33-36.32(chr1:1130311-2397177)x3	ACAP3|ANKRD65|ATAD3A|ATAD3B|ATAD3C|AURKAIP1|B3GALT6|C1QTNF12|CALML6|CCNL2|CDK11A|CDK11B|CFAP74|CPTP|DVL1|FAAP20|FNDC10|GABRD|GNB1|INTS11|MIB2|MMP23B|MORN1|MRPL20|MXRA8|NADK|PEX10|PRKCZ|PUSL1|RER1|SCNN1D|SDF4|SKI|SLC35E2A|SLC35E2B|SSU72|TAS1R3|TMEM240|TMEM52|TMEM88B|TNFRSF18|TNFRSF4|TTLL10|UBE2J2|VWA1		not provided	VCV001809089	1	1130311 - 2397177			1809089	1866093			copy number gain		Uncertain significance	Aug 24, 2021	criteria provided, single submitter
GRCh37/hg19 1p36.33(chr1:1751300-2107605)x3	CALML6|CFAP74|GABRD|GNB1|PRKCZ|TMEM52		not provided	VCV001808064	1	1751300 - 2107605			1808064	1865068			copy number gain		Uncertain significance	May 4, 2022	criteria provided, single submitter
GRCh37/hg19 1p36.33(chr1:1791789-2033256)x3	CALML6|CFAP74|GABRD|GNB1|PRKCZ|TMEM52		not provided	VCV000980937	1	1791789 - 2033256			980937	969015			copy number gain		Uncertain significance	Sep 7, 2019	no assertion criteria provided
GRCh37/hg19 1p36.33-36.32(chr1:82154-3349513)x3	ACAP3|ACTRT2|AGRN|ANKRD65|ATAD3A|ATAD3B|ATAD3C|AURKAIP1|B3GALT6|C1QTNF12|C1orf159|CALML6|CCNL2|CDK11A|CDK11B|CFAP74|CPTP|DVL1|FAAP20|FNDC10|GABRD|GNB1|HES4|HES5|INTS11|ISG15|KLHL17|MIB2|MIR200A|MIR200B|MIR429|MMEL1|MMP23B|MORN1|MRPL20|MXRA8|NADK|NOC2L|OR4F16|OR4F29|PANK4|PEX10|PLCH2|PLEKHN1|PRDM16|PRKCZ|PRXL2B|PUSL1|RER1|RNF223|SAMD11|SCNN1D|SDF4|SKI|SLC35E2A|SLC35E2B|SSU72|TAS1R3|TMEM240|TMEM52|…		See cases	VCV000816486	1	82154 - 3349513			816486	804691			copy number gain		Pathogenic	Feb 7, 2018	criteria provided, single submitter
GRCh37/hg19 1p36.33(chr1:727731-2107858)x3	CFAP74|TNFRSF4|TTLL10|UBE2J2|CPTP|MMP23B|NOC2L|PLEKHN1|PRKCZ|PUSL1|MRPL20|MXRA8|NADK|VWA1|GABRD|ACAP3|MIR200A|MIR200B|MIR429|DVL1|FNDC10|AGRN|ANKRD65|ATAD3A|ATAD3B|ATAD3C|AURKAIP1|B3GALT6|C1QTNF12|C1orf159|CALML6|CCNL2|CDK11A|CDK11B|GNB1|HES4|INTS11|ISG15|KLHL17|MIB2|RNF223|SAMD11|SCNN1D|SDF4|SLC35E2A|SLC35E2B|SSU72|TAS1R3|TMEM240|TMEM52|TMEM88B|TNFRSF18		not provided	VCV000685974	1	727731 - 2107858			685974	673566			copy number gain		Uncertain significance	Dec 28, 2017	no assertion criteria provided
GRCh37/hg19 1p36.33-36.31(chr1:1471075-5831645)	ACTRT2|AJAP1|ARHGEF16|C1orf174|CALML6|CCDC27|CDK11A|CDK11B|CEP104|CFAP74|DFFB|FAAP20|FNDC10|GABRD|GNB1|HES5|LRRC47|MEGF6|MIB2|MIR551A|MMEL1|MMP23B|MORN1|NADK|PANK4|PEX10|PLCH2|PRDM16|PRKCZ|PRXL2B|RER1|SKI|SLC35E2A|SLC35E2B|SMIM1|SSU72|TMEM240|TMEM52|TNFRSF14|TP73|TPRG1L|TTC34|WRAP73		not provided	VCV000625765	1	1471075 - 5831645			625765	614069			copy number gain		Pathogenic	Nov 1, 2018	criteria provided, single submitter
GRCh37/hg19 1p36.33(chr1:1815349-2056245)x3	PRKCZ|CALML6|GNB1|GABRD|CFAP74|TMEM52		not provided	VCV000565061	1	1815349 - 2056245			565061	556245			copy number gain		Uncertain significance	Apr 9, 2018	no assertion criteria provided
GRCh37/hg19 1p36.33-q44(chr1:849467-249224684)	CD34|CD46|CD48|CD52|CD53|CD55|CD58|CD5L|CD84|CDA|CDC14A|CDC20|CDC42|CDC42BPA|CDC42SE1|CDC7|CDC73|CDCA8|CDCP2|CDK11A|CDK11B|CDK18|CDKN2C|CELA2A|CELA2B|CELA3A|CELA3B|CELF3|CELSR2|CENPF|CENPL|CENPS|CENPS-CORT|CEP104|CEP170|CEP350|CEP85|CEPT1|CERS2|CFAP107|CFAP126|CFAP141|CFAP144|CFAP276|CFAP45|CFAP57|CFAP74|CFH|CFHR1|CFHR2|CFHR3|CFHR4|CFHR5|CGN|CHD1L|CHD5|CHI3L1|CHI3L2|CHIA|CHIT1|CHML|CHRM3|CHRNB2|C…		See cases	VCV000442387	1	849467 - 249224684			442387	436049			copy number gain		Pathogenic	Jul 14, 2015	no assertion criteria provided
GRCh37/hg19 1p36.33-q44(chr1:849467-249224684)x3	GPATCH2|GPATCH3|GPATCH4|GPBP1L1|GPN2|GPR137B|GPR153|GPR157|GPR161|GPR25|GPR3|GPR37L1|GPR52|GPR61|GPR88|GPR89A|GPR89B|GPSM2|GPX7|GREM2|GRHL3|GRIK3|GSTM1|GSTM2|GSTM3|GSTM4|GSTM5|GTF2B|GUCA2A|GUCA2B|GUK1|H2AC18|H2AC19|H2AC20|H2AC21|H2AC25|H2BC18|H2BC21|H2BC26|H3-3A|H3-4|H3C13|H3C14|H3C15|H4C14|H4C15|H6PD|HAO2|HAPLN2|HAX1|HCN3|HCRTR1|HDAC1|HDGF|HEATR1|HECTD3|HENMT1|HES2|HES3|HES4|HES5|HEYL|HFM1|HHAT|…		See cases	VCV000442386	1	849467 - 249224684			442386	436048			copy number gain		Pathogenic	Dec 2, 2014	no assertion criteria provided
GRCh37/hg19 1p36.33-36.32(chr1:852863-4203509)x3	ATAD3B|ATAD3A|ARHGEF16|ANKRD65|ACAP3|ACTRT2|AGRN|ATAD3C|AURKAIP1|B3GALT6|C1QTNF12|C1orf159|C1orf174|CALML6|CCDC27|CCNL2|CDK11A|CDK11B|CEP104|CFAP74|CPTP|DFFB|DVL1|FAAP20|FNDC10|GABRD|GNB1|HES4|HES5|INTS11|ISG15|KLHL17|LRRC47|MEGF6|MIB2|MIR200A|MIR200B|MIR429|MIR551A|MMEL1|MMP23B|MORN1|MRPL20|MXRA8|NADK|NOC2L|PANK4|PEX10|PLCH2|PLEKHN1|PRDM16|PRKCZ|PRXL2B|PUSL1|RER1|RNF223|SAMD11|SCNN1D|SDF4|SKI|SL…		Distal trisomy 1p36	VCV000427642	1	852863 - 4203509			427642	417078			copy number gain		Pathogenic	Mar 25, 2016	no assertion criteria provided
GRCh37/hg19 1p36.33-36.32(chr1:19225-4401691)x3	ACAP3|C1orf174|CALML6|ACTRT2|AGRN|ARHGEF16|ATAD3A|AURKAIP1|B3GALT6|C1QTNF12|C1orf159|CCDC27|ANKRD65|ATAD3B|ATAD3C|CCNL2|CDK11A|CDK11B|CEP104|CFAP74|CPTP|DFFB|DVL1|FAAP20|FNDC10|GABRD|GNB1|HES4|HES5|INTS11|ISG15|KLHL17|LRRC47|MEGF6|MIB2|MIR200A|MIR200B|MIR429|MIR551A|MMEL1|MMP23B|MORN1|MRPL20|MXRA8|NADK|NOC2L|OR4F16|OR4F29|OR4F5|PANK4|PEX10|PLCH2|PLEKHN1|PRDM16|PRKCZ|PRXL2B|PUSL1|RER1|RNF223|SAMD1…		See cases	VCV000393899	1	19225 - 4401691			393899	380792			copy number gain		Pathogenic		no assertion criteria provided
GRCh37/hg19 1p36.33(chr1:1770754-1989014)x3	CALML6|CFAP74|GABRD|TMEM52|GNB1|PRKCZ		See cases	VCV000253727	1	1770754 - 1989014			253727	248175			copy number gain		Uncertain significance	Jan 20, 2016	criteria provided, single submitter
GRCh37/hg19 1p36.33(chr1:1309373-2043694)x4	SLC35E2B|CALML6|MRPL20|TMEM240|CDK11A|CCNL2|AURKAIP1|CFAP74|PRKCZ|ANKRD65|ATAD3B|TMEM88B|SSU72|ATAD3C|CDK11B|GABRD|VWA1|MIB2|SLC35E2A|ATAD3A|GNB1|NADK|TMEM52|FNDC10|MMP23B		See cases	VCV000253365	1	1309373 - 2043694			253365	247813			copy number gain		Likely pathogenic	Jan 20, 2016	criteria provided, single submitter
GRCh38/hg38 1p36.33-36.23(chr1:629025-8537745)x1	LOC121967050|LOC121967051|LOC121967052|LOC121967053|ACAP3|ACOT7|ACTRT2|AGRN|AJAP1|ANKRD65|ANKRD65-AS1|ARHGEF16|ATAD3A|ATAD3B|ATAD3C|AURKAIP1|B3GALT6|C1QTNF12|C1orf159|C1orf174|CALML6|CAMTA1|CAMTA1-AS1|CAMTA1-AS2|CAMTA1-AS3|CAMTA1-DT|CAMTA1-IT1|CCDC27|CCNL2|CDK11A|CDK11B|CEP104|CFAP74|CHD5|CPTP|DFFB|DNAJC11|DVL1|ERRFI1|ERRFI1-DT|ESPN|FAAP20|FAM41C|FAM87B|FNDC10|GABRD|GNB1|GNB1-DT|GPR153|HES2|HES3|…		See cases	VCV000058242	1	564405 - 8597804	1	629025 - 8537745	58242	72837			copy number loss		Pathogenic	Aug 12, 2011	criteria provided, single submitter
GRCh38/hg38 1p36.33-36.31(chr1:629044-7008678)x1	LOC129929262|LOC129929263|LOC129929264|LOC129929265|LOC129929266|LOC129929267|LOC129929268|LOC129929269|LOC129929270|LOC129929271|LOC129929272|LOC132088605|LOC132088687|LOC132088688|LOC132088689|LOC132088690|LOC132088694|LOC132088704|LOC132088707|LOC132088708|LOC132088720|LOC132090658|LOC132205951|LRRC47|MEGF6|MIB2|MIR12136|MIR200A|MIR200B|MIR4251|MIR4252|MIR429|MIR4689|MIR551A|MIR6726|MIR6727|MI…		See cases	VCV000058244	1	564424 - 7068738	1	629044 - 7008678	58244	72839			copy number loss		Pathogenic	Aug 12, 2011	criteria provided, single submitter
GRCh38/hg38 1p36.33-36.32(chr1:629044-3346226)x1	LOC129929093|LOC129929110|LOC129929127|ACAP3|ACTRT2|AGRN|ANKRD65|ANKRD65-AS1|ATAD3A|ATAD3B|ATAD3C|AURKAIP1|B3GALT6|C1QTNF12|C1orf159|CALML6|CCNL2|CDK11A|CDK11B|CFAP74|CPTP|DVL1|FAAP20|FAM41C|FAM87B|FNDC10|GABRD|GNB1|GNB1-DT|HES4|HES5|INTS11|ISG15|KLHL17|LINC00115|LINC01128|LINC01342|LINC01409|LINC01770|LINC01786|LINC02593|LOC100288069|LOC100288175|LOC100996583|LOC105378586|LOC105378604|LOC1053789…		See cases	VCV000058243	1	564424 - 3262790	1	629044 - 3346226	58243	72838			copy number loss		Pathogenic	Aug 12, 2011	criteria provided, single submitter
GRCh38/hg38 1p36.33-36.32(chr1:778698-4898439)x1	ACAP3|ACTRT2|AGRN|AJAP1|ANKRD65|ANKRD65-AS1|ARHGEF16|ATAD3A|ATAD3B|ATAD3C|AURKAIP1|B3GALT6|C1QTNF12|C1orf159|C1orf174|CALML6|CCDC27|CCNL2|CDK11A|CDK11B|CEP104|CFAP74|CPTP|DFFB|DVL1|FAAP20|FAM41C|FAM87B|FNDC10|GABRD|GNB1|GNB1-DT|HES4|HES5|INTS11|ISG15|KLHL17|LINC00115|LINC01128|LINC01134|LINC01342|LINC01345|LINC01346|LINC01409|LINC01646|LINC01770|LINC01777|LINC01786|LINC02593|LINC02780|LOC10028817…		See cases	VCV000151451	1	714078 - 4958499	1	778698 - 4898439	151451	161202			copy number loss		Pathogenic	Apr 30, 2011	no assertion criteria provided
GRCh38/hg38 1p36.33-36.32(chr1:821713-4225085)x1	LOC129929191|LOC129929192|LOC129929193|LOC129929194|LOC129929195|LOC129929196|LOC129929197|LOC129929198|LOC129929199|LOC129929200|LOC129929201|LOC129929202|LOC129929203|LOC129929204|LOC129929205|LOC129929206|LOC129929207|LOC129929208|LOC129929209|LOC132088605|LOC132088687|LOC132088688|LOC132088689|LOC132088690|LOC132088694|LOC132088704|LOC132088707|LOC132088708|LOC132090658|LOC132205951|LRRC47|ME…		See cases	VCV000152849	1	757093 - 4285145	1	821713 - 4225085	152849	162600			copy number loss		Pathogenic	Apr 30, 2011	no assertion criteria provided
GRCh38/hg38 1p36.33-36.32(chr1:821713-5099990)x1	ACAP3|ACTRT2|AGRN|AJAP1|ANKRD65|ANKRD65-AS1|ARHGEF16|ATAD3A|ATAD3B|ATAD3C|AURKAIP1|B3GALT6|C1QTNF12|C1orf159|C1orf174|CALML6|CCDC27|CCNL2|CDK11A|CDK11B|CEP104|CFAP74|CPTP|DFFB|DVL1|FAAP20|FAM41C|FNDC10|GABRD|GNB1|GNB1-DT|HES4|HES5|INTS11|ISG15|KLHL17|LINC00115|LINC01128|LINC01134|LINC01342|LINC01345|LINC01346|LINC01646|LINC01770|LINC01777|LINC01786|LINC02593|LINC02780|LINC02782|LOC100288175|LOC10…		See cases	VCV000152807	1	757093 - 5160050	1	821713 - 5099990	152807	162558			copy number loss		Pathogenic	Oct 23, 2012	no assertion criteria provided
GRCh38/hg38 1p36.33-36.32(chr1:821713-2976123)x1	ACAP3|AGRN|ANKRD65|ANKRD65-AS1|ATAD3A|ATAD3B|ATAD3C|AURKAIP1|B3GALT6|C1QTNF12|C1orf159|CALML6|CCNL2|CDK11A|CDK11B|CFAP74|CPTP|DVL1|FAAP20|FAM41C|FNDC10|GABRD|GNB1|GNB1-DT|HES4|HES5|INTS11|ISG15|KLHL17|LINC00115|LINC01128|LINC01342|LINC01770|LINC01786|LINC02593|LOC100288175|LOC100996583|LOC105378586|LOC105378948|LOC106783496|LOC107985728|LOC110599576|LOC112268219|LOC112577469|LOC112577524|LOC11257…		See cases	VCV000152695	1	757093 - 2892687	1	821713 - 2976123	152695	162446			copy number loss		Pathogenic	Jan 9, 2013	no assertion criteria provided
GRCh38/hg38 1p36.33-36.32(chr1:821713-2636393)x1	LOC129929104|LOC129929105|LOC129929106|LOC129929107|LOC129929108|LOC129929109|LOC129929110|LOC129929111|LOC129929112|LOC129929113|LOC129929114|LOC129929115|LOC129929116|LOC129929117|LOC129929118|LOC129929119|LOC129929120|LOC129929121|LOC129929122|LOC129929123|LOC129929124|LOC129929125|LOC129929126|LOC129929127|LOC129929128|LOC129929129|LOC129929130|LOC129929131|LOC129929132|LOC129929133|LOC129929…		See cases	VCV000152675	1	757093 - 2567832	1	821713 - 2636393	152675	162426			copy number loss		Pathogenic	Apr 4, 2013	no assertion criteria provided
GRCh38/hg38 1p36.33-36.31(chr1:821713-5480263)x1	VWA1|WRAP73|ACAP3|ACTRT2|AGRN|AJAP1|ANKRD65|ANKRD65-AS1|ARHGEF16|ATAD3A|ATAD3B|ATAD3C|AURKAIP1|B3GALT6|C1QTNF12|C1orf159|C1orf174|CALML6|CCDC27|CCNL2|CDK11A|CDK11B|CEP104|CFAP74|CPTP|DFFB|DVL1|FAAP20|FAM41C|FNDC10|GABRD|GNB1|GNB1-DT|HES4|HES5|INTS11|ISG15|KLHL17|LINC00115|LINC01128|LINC01134|LINC01342|LINC01345|LINC01346|LINC01646|LINC01770|LINC01777|LINC01786|LINC02593|LINC02780|LINC02782|LOC100…		See cases	VCV000152050	1	757093 - 5540323	1	821713 - 5480263	152050	161801			copy number loss		Pathogenic	Nov 26, 2012	no assertion criteria provided
GRCh38/hg38 1p36.33-36.32(chr1:821713-2554047)x1	ACAP3|AGRN|ANKRD65|ANKRD65-AS1|ATAD3A|ATAD3B|ATAD3C|AURKAIP1|B3GALT6|C1QTNF12|C1orf159|CALML6|CCNL2|CDK11A|CDK11B|CFAP74|CPTP|DVL1|FAAP20|FAM41C|FNDC10|GABRD|GNB1|GNB1-DT|HES4|HES5|INTS11|ISG15|KLHL17|LINC00115|LINC01128|LINC01342|LINC01770|LINC01786|LINC02593|LOC100288175|LOC105378586|LOC105378948|LOC106783496|LOC107985728|LOC110599576|LOC112268219|LOC112577469|LOC112577524|LOC112577525|LOC11580…		See cases	VCV000151110	1	757093 - 2485486	1	821713 - 2554047	151110	160861			copy number loss		Pathogenic	Jul 18, 2014	no assertion criteria provided
GRCh38/hg38 1p36.33-36.32(chr1:821713-3438208)x1	ACAP3|ACTRT2|AGRN|ANKRD65|ANKRD65-AS1|ATAD3A|ATAD3B|ATAD3C|AURKAIP1|B3GALT6|C1QTNF12|C1orf159|CALML6|CCNL2|CDK11A|CDK11B|CFAP74|CPTP|DVL1|FAAP20|FAM41C|FNDC10|GABRD|GNB1|GNB1-DT|HES4|HES5|INTS11|ISG15|KLHL17|LINC00115|LINC01128|LINC01342|LINC01770|LINC01786|LINC02593|LOC100288175|LOC100996583|LOC105378586|LOC105378604|LOC105378948|LOC106783496|LOC107985728|LOC110120751|LOC110121223|LOC110599576|L…		See cases	VCV000150995	1	757093 - 3354772	1	821713 - 3438208	150995	160746			copy number loss		Pathogenic	Aug 13, 2012	no assertion criteria provided
GRCh38/hg38 1p36.33-36.31(chr1:821713-7000838)x1	CEP104|CFAP74|CHD5|CPTP|DFFB|DNAJC11|DVL1|ESPN|FAAP20|FAM41C|FNDC10|GABRD|GNB1|GNB1-DT|GPR153|HES2|HES3|HES4|HES5|ICMT|ICMT-DT|INTS11|ISG15|KCNAB2|KLHL17|KLHL21|LINC00115|LINC01128|LINC01134|LINC01342|LINC01345|LINC01346|LINC01646|LINC01672|LINC01770|LINC01777|LINC01786|LINC02593|LINC02780|LINC02782|LOC100288175|LOC100996583|LOC105378586|LOC105378604|LOC105378948|LOC106783496|LOC107985728|LOC1082…		See cases	VCV000149968	1	757093 - 7060898	1	821713 - 7000838	149968	159719			copy number loss		Pathogenic	Aug 2, 2011	no assertion criteria provided
GRCh38/hg38 1p36.33-36.32(chr1:821713-3569891)x1	ACAP3|ACTRT2|AGRN|ANKRD65|ANKRD65-AS1|ARHGEF16|ATAD3A|ATAD3B|ATAD3C|AURKAIP1|B3GALT6|C1QTNF12|C1orf159|CALML6|CCNL2|CDK11A|CDK11B|CFAP74|CPTP|DVL1|FAAP20|FAM41C|FNDC10|GABRD|GNB1|GNB1-DT|HES4|HES5|INTS11|ISG15|KLHL17|LINC00115|LINC01128|LINC01342|LINC01770|LINC01786|LINC02593|LOC100288175|LOC100996583|LOC105378586|LOC105378604|LOC105378948|LOC106783496|LOC107985728|LOC108281140|LOC110120751|LOC11…		See cases	VCV000149171	1	757093 - 3486455	1	821713 - 3569891	149171	158922			copy number loss		Pathogenic	Mar 12, 2012	no assertion criteria provided
GRCh38/hg38 1p36.33-36.32(chr1:821713-5239643)x1	ACAP3|ACTRT2|AGRN|AJAP1|ANKRD65|ANKRD65-AS1|ARHGEF16|ATAD3A|ATAD3B|ATAD3C|AURKAIP1|B3GALT6|C1QTNF12|C1orf159|C1orf174|CALML6|CCDC27|CCNL2|CDK11A|CDK11B|CEP104|CFAP74|CPTP|DFFB|DVL1|FAAP20|FAM41C|FNDC10|GABRD|GNB1|GNB1-DT|HES4|HES5|INTS11|ISG15|KLHL17|LINC00115|LINC01128|LINC01134|LINC01342|LINC01345|LINC01346|LINC01646|LINC01770|LINC01777|LINC01786|LINC02593|LINC02780|LINC02782|LOC100288175|LOC10…		See cases	VCV000148916	1	757093 - 5299703	1	821713 - 5239643	148916	158667			copy number loss		Pathogenic	Dec 2, 2011	no assertion criteria provided
GRCh38/hg38 1p36.33-36.32(chr1:821713-2463016)x1	ACAP3|AGRN|ANKRD65|ANKRD65-AS1|ATAD3A|ATAD3B|ATAD3C|AURKAIP1|B3GALT6|C1QTNF12|C1orf159|CALML6|CCNL2|CDK11A|CDK11B|CFAP74|CPTP|DVL1|FAAP20|FAM41C|FNDC10|GABRD|GNB1|GNB1-DT|HES4|INTS11|ISG15|KLHL17|LINC00115|LINC01128|LINC01342|LINC01770|LINC01786|LINC02593|LOC100288175|LOC105378586|LOC105378948|LOC106783496|LOC107985728|LOC110599576|LOC112268219|LOC112577469|LOC112577524|LOC112577525|LOC115801415|…		See cases	VCV000148825	1	757093 - 2394455	1	821713 - 2463016	148825	158576			copy number loss		Pathogenic	May 7, 2012	no assertion criteria provided
GRCh38/hg38 1p36.33-36.32(chr1:821713-4155674)x1	ACAP3|ACTRT2|AGRN|ANKRD65|ANKRD65-AS1|ARHGEF16|ATAD3A|ATAD3B|ATAD3C|AURKAIP1|B3GALT6|C1QTNF12|C1orf159|C1orf174|CALML6|CCDC27|CCNL2|CDK11A|CDK11B|CEP104|CFAP74|CPTP|DFFB|DVL1|FAAP20|FAM41C|FNDC10|GABRD|GNB1|GNB1-DT|HES4|HES5|INTS11|ISG15|KLHL17|LINC00115|LINC01128|LINC01134|LINC01342|LINC01345|LINC01346|LINC01770|LINC01786|LINC02593|LINC02780|LOC100288175|LOC100996583|LOC105378586|LOC105378604|LO…		See cases	VCV000058245	1	757093 - 4215734	1	821713 - 4155674	58245	72840			copy number loss		Pathogenic	Aug 12, 2011	criteria provided, single submitter
GRCh38/hg38 1p36.33-36.32(chr1:844347-2627474)x1	ACAP3|AGRN|ANKRD65|ANKRD65-AS1|ATAD3A|ATAD3B|ATAD3C|AURKAIP1|B3GALT6|C1QTNF12|C1orf159|CALML6|CCNL2|CDK11A|CDK11B|CFAP74|CPTP|DVL1|FAAP20|FAM41C|FNDC10|GABRD|GNB1|GNB1-DT|HES4|HES5|INTS11|ISG15|KLHL17|LINC01128|LINC01342|LINC01770|LINC01786|LINC02593|LOC100288175|LOC100996583|LOC105378586|LOC105378948|LOC106783496|LOC107985728|LOC110599576|LOC112268219|LOC112577469|LOC112577524|LOC112577525|LOC11…		See cases	VCV000160923	1	779727 - 2558913	1	844347 - 2627474	160923	170767			copy number loss		Pathogenic	Aug 12, 2011	criteria provided, multiple submitters, no conflicts
GRCh38/hg38 1p36.33-36.23(chr1:844347-7870545)x1	PUSL1|RER1|RNF207|RNF207-AS1|RNF223|RPL22|SAMD11|SCNN1D|SDF4|SKI|SLC35E2A|SLC35E2B|SMIM1|SNORD167|SSU72|TAS1R1|TAS1R3|THAP3|TMEM240|TMEM52|TMEM88B|TNFRSF14|TNFRSF14-AS1|TNFRSF18|TNFRSF25|TNFRSF4|TP73|TP73-AS1|TP73-AS2|TP73-AS3|TPRG1L|TTC34|TTLL10|TTLL10-AS1|UBE2J2|UTS2|VAMP3|VWA1|WRAP73|ZBTB48|ACAP3|ACOT7|ACTRT2|AGRN|AJAP1|ANKRD65|ANKRD65-AS1|ARHGEF16|ATAD3A|ATAD3B|ATAD3C|AURKAIP1|B3GALT6|C1QTNF1…		See cases	VCV000154642	1	779727 - 7930605	1	844347 - 7870545	154642	164396			copy number loss		Pathogenic	Dec 22, 2010	no assertion criteria provided
GRCh38/hg38 1p36.33-36.22(chr1:844347-12470133)x1	ACAP3|ACOT7|ACTRT2|AGRN|AGTRAP|AJAP1|ANGPTL7|ANKRD65|ANKRD65-AS1|ARHGEF16|ATAD3A|ATAD3B|ATAD3C|AURKAIP1|B3GALT6|C1QTNF12|C1orf127|C1orf159|C1orf167|C1orf167-AS1|C1orf174|CA6|CALML6|CAMTA1|CAMTA1-AS1|CAMTA1-AS2|CAMTA1-AS3|CAMTA1-DT|CAMTA1-IT1|CASZ1|CCDC27|CCNL2|CDK11A|CDK11B|CENPS|CENPS-CORT|CEP104|CFAP74|CHD5|CLCN6|CLSTN1|CORT|CPTP|CTNNBIP1|DFFA|DFFB|DISP3|DNAJC11|DRAXIN|DVL1|ENO1|ENO1-AS1|ERRFI1…		See cases	VCV000147521	1	779727 - 12530188	1	844347 - 12470133	147521	157272			copy number loss		Pathogenic	Dec 22, 2010	no assertion criteria provided
GRCh38/hg38 1p36.33-36.23(chr1:844347-8171914)x1	LOC129929192|LOC129929193|LOC129929194|LOC129929195|LOC129929196|LOC129929197|LOC129929198|LOC129929199|LOC129929200|LOC129929201|LOC129929202|LOC129929203|LOC129929204|LOC129929205|LOC129929206|LOC129929207|LOC129929208|LOC129929209|LOC129929210|LOC129929211|LOC129929212|LOC129929213|LOC129929214|LOC129929215|LOC129929216|LOC129929217|LOC129929218|LOC129929219|LOC129929220|LOC129929221|LOC129929…		See cases	VCV000147354	1	779727 - 8231974	1	844347 - 8171914	147354	157105			copy number loss		Pathogenic	Dec 22, 2010	no assertion criteria provided
GRCh38/hg38 1p36.33-36.32(chr1:844347-4398122)x1	ACAP3|ACTRT2|AGRN|ANKRD65|ANKRD65-AS1|ARHGEF16|ATAD3A|ATAD3B|ATAD3C|AURKAIP1|B3GALT6|C1QTNF12|C1orf159|C1orf174|CALML6|CCDC27|CCNL2|CDK11A|CDK11B|CEP104|CFAP74|CPTP|DFFB|DVL1|FAAP20|FAM41C|FNDC10|GABRD|GNB1|GNB1-DT|HES4|HES5|INTS11|ISG15|KLHL17|LINC01128|LINC01134|LINC01342|LINC01345|LINC01346|LINC01770|LINC01786|LINC02593|LINC02780|LOC100288175|LOC100996583|LOC105378586|LOC105378604|LOC105378948…		See cases	VCV000144707	1	779727 - 4458182	1	844347 - 4398122	144707	154458			copy number loss		Pathogenic	Aug 18, 2010	no assertion criteria provided
GRCh38/hg38 1p36.33-36.31(chr1:844347-6916587)x1	ACAP3|ACOT7|ACTRT2|AGRN|AJAP1|ANKRD65|ANKRD65-AS1|ARHGEF16|ATAD3A|ATAD3B|ATAD3C|AURKAIP1|B3GALT6|C1QTNF12|C1orf159|C1orf174|CALML6|CAMTA1|CAMTA1-DT|CCDC27|CCNL2|CDK11A|CDK11B|CEP104|CFAP74|CHD5|CPTP|DFFB|DNAJC11|DVL1|ESPN|FAAP20|FAM41C|FNDC10|GABRD|GNB1|GNB1-DT|GPR153|HES2|HES3|HES4|HES5|ICMT|ICMT-DT|INTS11|ISG15|KCNAB2|KLHL17|KLHL21|LINC01128|LINC01134|LINC01342|LINC01345|LINC01346|LINC01646|LIN…		See cases	VCV000144461	1	779727 - 6976647	1	844347 - 6916587	144461	154212			copy number loss		Pathogenic	Mar 30, 2010	no assertion criteria provided
GRCh38/hg38 1p36.33(chr1:844347-2131805)x1	ACAP3|AGRN|ANKRD65|ANKRD65-AS1|ATAD3A|ATAD3B|ATAD3C|AURKAIP1|B3GALT6|C1QTNF12|C1orf159|CALML6|CCNL2|CDK11A|CDK11B|CFAP74|CPTP|DVL1|FAM41C|FNDC10|GABRD|GNB1|GNB1-DT|HES4|INTS11|ISG15|KLHL17|LINC01128|LINC01342|LINC01770|LINC01786|LINC02593|LOC100288175|LOC105378586|LOC105378948|LOC106783496|LOC107985728|LOC110599576|LOC112577469|LOC115801415|LOC121677382|LOC121967042|LOC121967043|LOC121967044|LOC1…		See cases	VCV000058292	1	779727 - 2063244	1	844347 - 2131805	58292	72887			copy number loss		Pathogenic	Aug 12, 2011	criteria provided, single submitter
GRCh38/hg38 1p36.33-36.32(chr1:844347-4665295)x1	ACAP3|ACTRT2|AGRN|AJAP1|ANKRD65|ANKRD65-AS1|ARHGEF16|ATAD3A|ATAD3B|ATAD3C|AURKAIP1|B3GALT6|C1QTNF12|C1orf159|C1orf174|CALML6|CCDC27|CCNL2|CDK11A|CDK11B|CEP104|CFAP74|CPTP|DFFB|DVL1|FAAP20|FAM41C|FNDC10|GABRD|GNB1|GNB1-DT|HES4|HES5|INTS11|ISG15|KLHL17|LINC01128|LINC01134|LINC01342|LINC01345|LINC01346|LINC01646|LINC01770|LINC01777|LINC01786|LINC02593|LINC02780|LOC100288175|LOC100996583|LOC105378586…		See cases	VCV000058289	1	779727 - 4725355	1	844347 - 4665295	58289	72884			copy number loss		Pathogenic	Aug 12, 2011	criteria provided, single submitter
GRCh38/hg38 1p36.33-36.31(chr1:844347-6477436)x1	ACAP3|ACOT7|ACTRT2|AGRN|AJAP1|ANKRD65|ANKRD65-AS1|ARHGEF16|ATAD3A|ATAD3B|ATAD3C|AURKAIP1|B3GALT6|C1QTNF12|C1orf159|C1orf174|CALML6|CCDC27|CCNL2|CDK11A|CDK11B|CEP104|CFAP74|CHD5|CPTP|DFFB|DVL1|ESPN|FAAP20|FAM41C|FNDC10|GABRD|GNB1|GNB1-DT|GPR153|HES2|HES3|HES4|HES5|ICMT|ICMT-DT|INTS11|ISG15|KCNAB2|KLHL17|LINC01128|LINC01134|LINC01342|LINC01345|LINC01346|LINC01646|LINC01770|LINC01777|LINC01786|LINC0…		See cases	VCV000057440	1	779727 - 6537496	1	844347 - 6477436	57440	72035			copy number loss		Pathogenic	Aug 12, 2011	criteria provided, single submitter
GRCh38/hg38 1p36.33-36.32(chr1:844347-3712147)x1	ACAP3|ACTRT2|AGRN|ANKRD65|ANKRD65-AS1|ARHGEF16|ATAD3A|ATAD3B|ATAD3C|AURKAIP1|B3GALT6|C1QTNF12|C1orf159|CALML6|CCNL2|CDK11A|CDK11B|CFAP74|CPTP|DVL1|FAAP20|FAM41C|FNDC10|GABRD|GNB1|GNB1-DT|HES4|HES5|INTS11|ISG15|KLHL17|LINC01128|LINC01342|LINC01770|LINC01786|LINC02593|LOC100288175|LOC100996583|LOC105378586|LOC105378604|LOC105378948|LOC106783496|LOC107985728|LOC108281140|LOC110120751|LOC110121223|LO…		See cases	VCV000057218	1	779727 - 3628711	1	844347 - 3712147	57218	71813			copy number loss		Pathogenic	Aug 12, 2011	criteria provided, single submitter
GRCh38/hg38 1p36.33-36.32(chr1:844347-3006252)x1	LOC129929161|LOC129929162|LOC129929163|LOC129929164|LOC129929165|LOC129929166|LOC129929167|LOC129929168|LOC129929169|LOC129929170|LOC129929171|LOC129929172|LOC129929173|LOC129929174|LOC129929175|LOC129929176|LOC129929177|LOC129929178|LOC129929179|LOC129929180|LOC129929181|LOC129929182|LOC129929183|LOC129929184|LOC129929185|LOC129929186|LOC129929187|LOC129929188|LOC129929189|LOC129929190|LOC132088…		See cases	VCV000057201	1	779727 - 2922816	1	844347 - 3006252	57201	71796			copy number loss		Pathogenic	Aug 12, 2011	criteria provided, single submitter
GRCh38/hg38 1p36.33-36.32(chr1:844347-2627474)x1	LOC129929114|LOC129929115|LOC129929116|LOC129929117|LOC129929118|LOC129929119|LOC129929120|LOC129929121|LOC129929122|LOC129929123|LOC129929124|LOC129929125|LOC129929126|LOC129929127|LOC129929128|LOC129929129|LOC129929130|LOC129929131|LOC129929132|LOC129929133|LOC129929134|LOC129929135|LOC129929136|LOC129929137|LOC129929138|LOC129929139|LOC129929140|LOC129929141|LOC129929142|LOC129929143|LOC129929…		See cases	VCV000057120	1	779727 - 2558913	1	844347 - 2627474	57120	71715			copy number loss		Pathogenic	Sep 16, 2011	no assertion criteria provided
GRCh38/hg38 1p36.33-36.32(chr1:844347-3319395)x1	ACAP3|ACTRT2|AGRN|ANKRD65|ANKRD65-AS1|ATAD3A|ATAD3B|ATAD3C|AURKAIP1|B3GALT6|C1QTNF12|C1orf159|CALML6|CCNL2|CDK11A|CDK11B|CFAP74|CPTP|DVL1|FAAP20|FAM41C|FNDC10|GABRD|GNB1|GNB1-DT|HES4|HES5|INTS11|ISG15|KLHL17|LINC01128|LINC01342|LINC01770|LINC01786|LINC02593|LOC100288175|LOC100996583|LOC105378586|LOC105378604|LOC105378948|LOC106783496|LOC107985728|LOC110120751|LOC110599576|LOC112268219|LOC11257746…		See cases	VCV000057052	1	779727 - 3235959	1	844347 - 3319395	57052	71647			copy number loss		Pathogenic	Aug 12, 2011	criteria provided, single submitter
GRCh38/hg38 1p36.33-36.31(chr1:844347-5682587)x1	LINC01786|LINC02593|LINC02780|LINC02782|LOC100288175|LOC100996583|LOC105378586|LOC105378604|LOC105378948|LOC106783496|LOC107985728|LOC108281140|LOC110120751|LOC110121223|LOC110599576|LOC112268219|LOC112577469|LOC112577524|LOC112577525|LOC112577578|LOC112577579|LOC112577581|LOC115801415|LOC120851201|LOC121677382|LOC121677383|LOC121677384|LOC121967042|LOC121967043|LOC121967044|LOC121967045|LOC12196…		See cases	VCV000057049	1	779727 - 5742647	1	844347 - 5682587	57049	71644			copy number loss		Pathogenic	Aug 12, 2011	criteria provided, single submitter
GRCh38/hg38 1p36.33-36.31(chr1:844353-6477474)x1	LOC129929237|LOC129929238|LOC129929239|LOC129929240|LOC129929241|LOC129929242|LOC129929243|LOC132088605|LOC132088687|LOC132088688|LOC132088689|LOC132088690|LOC132088694|LOC132088704|LOC132088707|LOC132088708|LOC132088720|LOC132090658|LOC132205951|LRRC47|MEGF6|MIB2|MIR200A|MIR200B|MIR4251|MIR4252|MIR429|MIR4689|MIR551A|MIR6726|MIR6727|MIR6808|MMEL1|MMEL1-AS1|MMP23B|MORN1|MRPL20|MRPL20-AS1|MRPL20-D…		See cases	VCV000150566	1	779733 - 6537534	1	844353 - 6477474	150566	160317			copy number loss		Pathogenic	Sep 21, 2012	no assertion criteria provided
GRCh38/hg38 1p36.33-36.32(chr1:844353-3153909)x1	ACAP3|ACTRT2|AGRN|ANKRD65|ANKRD65-AS1|ATAD3A|ATAD3B|ATAD3C|AURKAIP1|B3GALT6|C1QTNF12|C1orf159|CALML6|CCNL2|CDK11A|CDK11B|CFAP74|CPTP|DVL1|FAAP20|FAM41C|FNDC10|GABRD|GNB1|GNB1-DT|HES4|HES5|INTS11|ISG15|KLHL17|LINC01128|LINC01342|LINC01770|LINC01786|LINC02593|LOC100288175|LOC100996583|LOC105378586|LOC105378948|LOC106783496|LOC107985728|LOC110599576|LOC112268219|LOC112577469|LOC112577524|LOC11257752…		See cases	VCV000149739	1	779733 - 3070473	1	844353 - 3153909	149739	159490			copy number loss		Pathogenic	Sep 21, 2012	no assertion criteria provided
GRCh38/hg38 1p36.33-36.32(chr1:844353-3487877)x1	ACAP3|ACTRT2|AGRN|ANKRD65|ANKRD65-AS1|ARHGEF16|ATAD3A|ATAD3B|ATAD3C|AURKAIP1|B3GALT6|C1QTNF12|C1orf159|CALML6|CCNL2|CDK11A|CDK11B|CFAP74|CPTP|DVL1|FAAP20|FAM41C|FNDC10|GABRD|GNB1|GNB1-DT|HES4|HES5|INTS11|ISG15|KLHL17|LINC01128|LINC01342|LINC01770|LINC01786|LINC02593|LOC100288175|LOC100996583|LOC105378586|LOC105378604|LOC105378948|LOC106783496|LOC107985728|LOC110120751|LOC110121223|LOC110599576|LO…		See cases	VCV000145356	1	779733 - 3404441	1	844353 - 3487877	145356	155107			copy number loss		Pathogenic	Jul 30, 2010	no assertion criteria provided
GRCh38/hg38 1p36.33-36.32(chr1:844353-2420916)x1	ACAP3|AGRN|ANKRD65|ANKRD65-AS1|ATAD3A|ATAD3B|ATAD3C|AURKAIP1|B3GALT6|C1QTNF12|C1orf159|CALML6|CCNL2|CDK11A|CDK11B|CFAP74|CPTP|DVL1|FAAP20|FAM41C|FNDC10|GABRD|GNB1|GNB1-DT|HES4|INTS11|ISG15|KLHL17|LINC01128|LINC01342|LINC01770|LINC01786|LINC02593|LOC100288175|LOC105378586|LOC105378948|LOC106783496|LOC107985728|LOC110599576|LOC112268219|LOC112577469|LOC112577524|LOC112577525|LOC115801415|LOC1216773…		See cases	VCV000144576	1	779733 - 2352355	1	844353 - 2420916	144576	154327			copy number loss		Pathogenic	May 30, 2010	no assertion criteria provided
GRCh38/hg38 1p36.33-36.32(chr1:845437-2523513)x1	ACAP3|AGRN|ANKRD65|ANKRD65-AS1|ATAD3A|ATAD3B|ATAD3C|AURKAIP1|B3GALT6|C1QTNF12|C1orf159|CALML6|CCNL2|CDK11A|CDK11B|CFAP74|CPTP|DVL1|FAAP20|FAM41C|FNDC10|GABRD|GNB1|GNB1-DT|HES4|INTS11|ISG15|KLHL17|LINC01128|LINC01342|LINC01770|LINC01786|LINC02593|LOC100288175|LOC105378586|LOC105378948|LOC106783496|LOC107985728|LOC110599576|LOC112268219|LOC112577469|LOC112577524|LOC112577525|LOC115801415|LOC1216773…		See cases	VCV000058293	1	780817 - 2454952	1	845437 - 2523513	58293	72888			copy number loss		Pathogenic	Aug 12, 2011	criteria provided, single submitter
GRCh38/hg38 1p36.33-36.23(chr1:859215-8747647)x1	ACAP3|ACOT7|ACTRT2|AGRN|AJAP1|ANKRD65|ANKRD65-AS1|ARHGEF16|ATAD3A|ATAD3B|ATAD3C|AURKAIP1|B3GALT6|C1QTNF12|C1orf159|C1orf174|CALML6|CAMTA1|CAMTA1-AS1|CAMTA1-AS2|CAMTA1-AS3|CAMTA1-DT|CAMTA1-IT1|CCDC27|CCNL2|CDK11A|CDK11B|CEP104|CFAP74|CHD5|CPTP|DFFB|DNAJC11|DVL1|ERRFI1|ERRFI1-DT|ESPN|FAAP20|FAM41C|FNDC10|GABRD|GNB1|GNB1-DT|GPR153|HES2|HES3|HES4|HES5|ICMT|ICMT-DT|INTS11|ISG15|KCNAB2|KLHL17|KLHL21|LI…		See cases	VCV000058294	1	794595 - 8807706	1	859215 - 8747647	58294	72889			copy number loss		Pathogenic	Aug 12, 2011	criteria provided, single submitter
GRCh38/hg38 1p36.33-36.32(chr1:870177-4426613)x1	ACAP3|ACTRT2|AGRN|ANKRD65|ANKRD65-AS1|ARHGEF16|ATAD3A|ATAD3B|ATAD3C|AURKAIP1|B3GALT6|C1QTNF12|C1orf159|C1orf174|CALML6|CCDC27|CCNL2|CDK11A|CDK11B|CEP104|CFAP74|CPTP|DFFB|DVL1|FAAP20|FAM41C|FNDC10|GABRD|GNB1|GNB1-DT|HES4|HES5|INTS11|ISG15|KLHL17|LINC01134|LINC01342|LINC01345|LINC01346|LINC01770|LINC01777|LINC01786|LINC02593|LINC02780|LOC100288175|LOC100996583|LOC105378586|LOC105378604|LOC105378948…		See cases	VCV000058311	1	805557 - 4486673	1	870177 - 4426613	58311	72906			copy number loss		Pathogenic	Aug 12, 2011	criteria provided, single submitter
GRCh38/hg38 1p36.33-36.32(chr1:872305-2642603)x1	ACAP3|AGRN|ANKRD65|ANKRD65-AS1|ATAD3A|ATAD3B|ATAD3C|AURKAIP1|B3GALT6|C1QTNF12|C1orf159|CALML6|CCNL2|CDK11A|CDK11B|CFAP74|CPTP|DVL1|FAAP20|FAM41C|FNDC10|GABRD|GNB1|GNB1-DT|HES4|HES5|INTS11|ISG15|KLHL17|LINC01342|LINC01770|LINC01786|LINC02593|LOC100288175|LOC100996583|LOC105378586|LOC105378948|LOC106783496|LOC107985728|LOC110599576|LOC112268219|LOC112577469|LOC112577524|LOC112577525|LOC115801415|LO…		See cases	VCV000058316	1	807685 - 2574042	1	872305 - 2642603	58316	72911			copy number loss		Pathogenic	Aug 12, 2011	criteria provided, single submitter
GRCh38/hg38 1p36.33-36.32(chr1:872305-4133409)x1	ACAP3|ACTRT2|AGRN|ANKRD65|ANKRD65-AS1|ARHGEF16|ATAD3A|ATAD3B|ATAD3C|AURKAIP1|B3GALT6|C1QTNF12|C1orf159|C1orf174|CALML6|CCDC27|CCNL2|CDK11A|CDK11B|CEP104|CFAP74|CPTP|DFFB|DVL1|FAAP20|FAM41C|FNDC10|GABRD|GNB1|GNB1-DT|HES4|HES5|INTS11|ISG15|KLHL17|LINC01134|LINC01342|LINC01345|LINC01346|LINC01770|LINC01786|LINC02593|LINC02780|LOC100288175|LOC100996583|LOC105378586|LOC105378604|LOC105378948|LOC106783…		See cases	VCV000058314	1	807685 - 4193469	1	872305 - 4133409	58314	72909			copy number loss		Pathogenic	Aug 12, 2011	criteria provided, single submitter
GRCh38/hg38 1p36.33-36.32(chr1:872305-3054463)x1	LOC126805582|LOC129388419|LOC129388420|LOC129388421|LOC129388422|LOC129388423|LOC129929060|LOC129929061|LOC129929062|LOC129929063|LOC129929064|LOC129929065|LOC129929066|LOC129929067|LOC129929068|LOC129929069|LOC129929070|LOC129929071|LOC129929072|LOC129929073|LOC129929074|LOC129929075|LOC129929076|LOC129929077|LOC129929078|LOC129929079|LOC129929080|LOC129929081|LOC129929082|LOC129929083|LOC129929…		See cases	VCV000058313	1	807685 - 2971027	1	872305 - 3054463	58313	72908			copy number loss		Pathogenic	Aug 12, 2011	criteria provided, single submitter
GRCh38/hg38 1p36.33(chr1:872305-2047715)x1	ACAP3|AGRN|ANKRD65|ANKRD65-AS1|ATAD3A|ATAD3B|ATAD3C|AURKAIP1|B3GALT6|C1QTNF12|C1orf159|CALML6|CCNL2|CDK11A|CDK11B|CFAP74|CPTP|DVL1|FAM41C|FNDC10|GABRD|GNB1|GNB1-DT|HES4|INTS11|ISG15|KLHL17|LINC01342|LINC01770|LINC01786|LINC02593|LOC100288175|LOC105378586|LOC105378948|LOC106783496|LOC107985728|LOC110599576|LOC112577469|LOC115801415|LOC121677382|LOC121967042|LOC121967043|LOC121967044|LOC121967045|L…		See cases	VCV000058312	1	807685 - 1979154	1	872305 - 2047715	58312	72907			copy number loss		Pathogenic	Aug 12, 2011	criteria provided, single submitter
GRCh38/hg38 1p36.33-36.32(chr1:874379-4973261)x1	ACAP3|ACTRT2|AGRN|AJAP1|ANKRD65|ANKRD65-AS1|ARHGEF16|ATAD3A|ATAD3B|ATAD3C|AURKAIP1|B3GALT6|C1QTNF12|C1orf159|C1orf174|CALML6|CCDC27|CCNL2|CDK11A|CDK11B|CEP104|CFAP74|CPTP|DFFB|DVL1|FAAP20|FAM41C|FNDC10|GABRD|GNB1|GNB1-DT|HES4|HES5|INTS11|ISG15|KLHL17|LINC01134|LINC01342|LINC01345|LINC01346|LINC01646|LINC01770|LINC01777|LINC01786|LINC02593|LINC02780|LOC100288175|LOC100996583|LOC105378586|LOC105378…		See cases	VCV000147545	1	809759 - 5033321	1	874379 - 4973261	147545	157296			copy number loss		Pathogenic	Oct 1, 2010	no assertion criteria provided
GRCh38/hg38 1p36.33-36.23(chr1:898721-7811306)x1	LOC129929075|LOC129929076|LOC129929077|LOC129929078|LOC129929079|LOC129929080|LOC129929081|LOC129929082|LOC129929083|LOC129929084|LOC129929085|LOC129929086|LOC129929087|LOC129929088|LOC129929089|LOC129929090|LOC129929091|LOC129929092|LOC129929093|LOC129929094|LOC129929095|LOC129929096|LOC129929097|LOC129929098|LOC129929099|LOC129929100|LOC129929101|LOC129929102|LOC129929103|LOC129929104|LOC129929…		See cases	VCV000154584	1	834101 - 7871366	1	898721 - 7811306	154584	164338			copy number loss		Pathogenic	Sep 16, 2011	no assertion criteria provided
GRCh38/hg38 1p36.33-36.22(chr1:902111-9556305)x1	ACAP3|ACOT7|ACTRT2|AGRN|AJAP1|ANKRD65|ANKRD65-AS1|ARHGEF16|ATAD3A|ATAD3B|ATAD3C|AURKAIP1|B3GALT6|C1QTNF12|C1orf159|C1orf174|CA6|CALML6|CAMTA1|CAMTA1-AS1|CAMTA1-AS2|CAMTA1-AS3|CAMTA1-DT|CAMTA1-IT1|CCDC27|CCNL2|CDK11A|CDK11B|CEP104|CFAP74|CHD5|CPTP|DFFB|DNAJC11|DVL1|ENO1|ENO1-AS1|ERRFI1|ERRFI1-DT|ESPN|FAAP20|FNDC10|GABRD|GNB1|GNB1-DT|GPR153|GPR157|H6PD|HES2|HES3|HES4|HES5|ICMT|ICMT-DT|INTS11|ISG15|…		See cases	VCV000153078	1	837491 - 9616363	1	902111 - 9556305	153078	162829			copy number loss		Pathogenic	Oct 1, 2010	no assertion criteria provided
GRCh38/hg38 1p36.33-36.32(chr1:911300-2963389)x1	ACAP3|AGRN|ANKRD65|ANKRD65-AS1|ATAD3A|ATAD3B|ATAD3C|AURKAIP1|B3GALT6|C1QTNF12|C1orf159|CALML6|CCNL2|CDK11A|CDK11B|CFAP74|CPTP|DVL1|FAAP20|FNDC10|GABRD|GNB1|GNB1-DT|HES4|HES5|INTS11|ISG15|KLHL17|LINC01342|LINC01770|LINC01786|LINC02593|LOC100288175|LOC100996583|LOC105378586|LOC105378948|LOC106783496|LOC107985728|LOC110599576|LOC112268219|LOC112577469|LOC112577524|LOC112577525|LOC115801415|LOC121677…		See cases	VCV000154687	1	846680 - 2879954	1	911300 - 2963389	154687	164441			copy number loss		Pathogenic	Dec 22, 2010	no assertion criteria provided
GRCh38/hg38 1p36.33-36.22(chr1:911300-9329925)x1	LRRC47|MEGF6|MIB2|MIR200A|MIR200B|MIR34A|MIR34AHG|MIR4251|MIR4252|MIR429|MIR4689|MIR551A|MIR6726|MIR6727|MIR6728|MIR6808|MMEL1|MMEL1-AS1|MMP23B|MORN1|MRPL20|MRPL20-AS1|MRPL20-DT|MXRA8|NADK|NOC2L|NOL9|NPHP4|PANK4|PARK7|PER3|PERM1|PEX10|PHF13|PLCH2|PLEKHG5|PLEKHN1|PRDM16|PRDM16-DT|PRKCZ|PRKCZ-AS1|PRKCZ-DT|PRXL2B|PUSL1|RER1|RERE|RERE-AS1|RNF207|RNF207-AS1|RNF223|RPL22|SAMD11|SCNN1D|SDF4|SKI|SLC2A5|S…		See cases	VCV000154548	1	846680 - 9389984	1	911300 - 9329925	154548	164302			copy number loss		Pathogenic	Nov 30, 2009	no assertion criteria provided
GRCh38/hg38 1p36.33-36.22(chr1:914086-9567122)x1	LOC129929302|LOC129929303|LOC129929304|LOC129929305|LOC129929306|LOC129929307|LOC129929308|LOC129929309|LOC129929310|LOC129929311|LOC129929312|LOC129929313|LOC129929314|LOC129929315|LOC129929316|LOC129929317|LOC129929318|LOC129929319|LOC129929320|LOC129929321|LOC129929322|LOC129929323|LOC129929324|LOC129929325|LOC129929326|LOC129929327|LOC129929328|LOC129929329|LOC129929330|LOC129929331|LOC129929…		See cases	VCV000153663	1	849466 - 9627180	1	914086 - 9567122	153663	163414			copy number loss		Pathogenic	Aug 2, 2013	no assertion criteria provided
GRCh38/hg38 1p36.33-36.32(chr1:914086-3587042)x1	ACAP3|ACTRT2|AGRN|ANKRD65|ANKRD65-AS1|ARHGEF16|ATAD3A|ATAD3B|ATAD3C|AURKAIP1|B3GALT6|C1QTNF12|C1orf159|CALML6|CCNL2|CDK11A|CDK11B|CFAP74|CPTP|DVL1|FAAP20|FNDC10|GABRD|GNB1|GNB1-DT|HES4|HES5|INTS11|ISG15|KLHL17|LINC01342|LINC01770|LINC01786|LINC02593|LOC100288175|LOC100996583|LOC105378586|LOC105378604|LOC105378948|LOC106783496|LOC107985728|LOC108281140|LOC110120751|LOC110121223|LOC110599576|LOC112…		See cases	VCV000153195	1	849466 - 3503606	1	914086 - 3587042	153195	162946			copy number loss		Pathogenic	Mar 24, 2014	no assertion criteria provided
GRCh38/hg38 1p36.33-36.32(chr1:914086-3305463)x1	ACAP3|ACTRT2|AGRN|ANKRD65|ANKRD65-AS1|ATAD3A|ATAD3B|ATAD3C|AURKAIP1|B3GALT6|C1QTNF12|C1orf159|CALML6|CCNL2|CDK11A|CDK11B|CFAP74|CPTP|DVL1|FAAP20|FNDC10|GABRD|GNB1|GNB1-DT|HES4|HES5|INTS11|ISG15|KLHL17|LINC01342|LINC01770|LINC01786|LINC02593|LOC100288175|LOC100996583|LOC105378586|LOC105378948|LOC106783496|LOC107985728|LOC110120751|LOC110599576|LOC112268219|LOC112577469|LOC112577524|LOC112577525|LO…		See cases	VCV000152333	1	849466 - 3222027	1	914086 - 3305463	152333	162084			copy number loss		Pathogenic	Mar 19, 2013	no assertion criteria provided
GRCh38/hg38 1p36.33-36.32(chr1:914086-2465738)x1	LOC129929169|LOC129929170|LOC129929171|LOC129929172|LOC129929173|LOC129929174|LOC129929175|LOC129929176|LOC129929177|LOC129929178|LOC129929179|LOC129929180|LOC129929181|LOC129929182|LOC129929183|LOC129929184|LOC129929185|LOC129929186|LOC129929187|LOC129929188|LOC129929189|LOC132088605|MIB2|MIR200A|MIR200B|MIR429|MIR6726|MIR6727|MIR6808|MMP23B|MORN1|MRPL20|MRPL20-AS1|MRPL20-DT|MXRA8|NADK|NOC2L|PER…		See cases	VCV000152331	1	849466 - 2397177	1	914086 - 2465738	152331	162082			copy number loss		Pathogenic	Jul 18, 2014	no assertion criteria provided
GRCh38/hg38 1p36.33-36.32(chr1:1022094-4665295)x1	ACAP3|ACTRT2|AGRN|AJAP1|ANKRD65|ANKRD65-AS1|ARHGEF16|ATAD3A|ATAD3B|ATAD3C|AURKAIP1|B3GALT6|C1QTNF12|C1orf159|C1orf174|CALML6|CCDC27|CCNL2|CDK11A|CDK11B|CEP104|CFAP74|CPTP|DFFB|DVL1|FAAP20|FNDC10|GABRD|GNB1|GNB1-DT|HES5|INTS11|LINC01134|LINC01342|LINC01345|LINC01346|LINC01646|LINC01770|LINC01777|LINC01786|LINC02780|LOC100288175|LOC100996583|LOC105378586|LOC105378604|LOC105378948|LOC106783496|LOC10…		See cases	VCV000148305	1	957474 - 4725355	1	1022094 - 4665295	148305	158056			copy number loss		Pathogenic	Apr 14, 2011	no assertion criteria provided
GRCh38/hg38 1p36.33-36.32(chr1:1072906-2806838)x1	ACAP3|ANKRD65|ANKRD65-AS1|ATAD3A|ATAD3B|ATAD3C|AURKAIP1|B3GALT6|C1QTNF12|C1orf159|CALML6|CCNL2|CDK11A|CDK11B|CFAP74|CPTP|DVL1|FAAP20|FNDC10|GABRD|GNB1|GNB1-DT|HES5|INTS11|LINC01342|LINC01770|LINC01786|LOC100996583|LOC105378586|LOC110599576|LOC112268219|LOC112577469|LOC112577524|LOC112577525|LOC115801415|LOC121677382|LOC121677383|LOC121967042|LOC121967043|LOC121967044|LOC121967045|LOC121967046|LOC…		See cases	VCV000149947	1	1008286 - 2723403	1	1072906 - 2806838	149947	159698			copy number loss		Pathogenic	Apr 4, 2013	no assertion criteria provided
GRCh38/hg38 1p36.33-36.32(chr1:1118636-4179080)x1	ACAP3|ACTRT2|ANKRD65|ANKRD65-AS1|ARHGEF16|ATAD3A|ATAD3B|ATAD3C|AURKAIP1|B3GALT6|C1QTNF12|C1orf174|CALML6|CCDC27|CCNL2|CDK11A|CDK11B|CEP104|CFAP74|CPTP|DFFB|DVL1|FAAP20|FNDC10|GABRD|GNB1|GNB1-DT|HES5|INTS11|LINC01134|LINC01342|LINC01345|LINC01346|LINC01770|LINC01786|LINC02780|LOC100996583|LOC105378586|LOC105378604|LOC108281140|LOC110120751|LOC110121223|LOC110599576|LOC112268219|LOC112577524|LOC112…		See cases	VCV000144807	1	1054016 - 4239140	1	1118636 - 4179080	144807	154558			copy number loss		Pathogenic	Nov 30, 2010	no assertion criteria provided
GRCh38/hg38 1p36.33-36.31(chr1:1181847-5507243)x1	ACAP3|ACTRT2|AJAP1|ANKRD65|ANKRD65-AS1|ARHGEF16|ATAD3A|ATAD3B|ATAD3C|AURKAIP1|B3GALT6|C1QTNF12|C1orf174|CALML6|CCDC27|CCNL2|CDK11A|CDK11B|CEP104|CFAP74|CPTP|DFFB|DVL1|FAAP20|FNDC10|GABRD|GNB1|GNB1-DT|HES5|INTS11|LINC01134|LINC01345|LINC01346|LINC01646|LINC01770|LINC01777|LINC01786|LINC02780|LINC02782|LOC100996583|LOC105378586|LOC105378604|LOC108281140|LOC110120751|LOC110121223|LOC110599576|LOC112…		See cases	VCV000058318	1	1117227 - 5567303	1	1181847 - 5507243	58318	72913			copy number loss		Pathogenic	Aug 12, 2011	criteria provided, single submitter
GRCh38/hg38 1p36.33-36.32(chr1:1482278-3152536)x1	ACTRT2|ATAD3A|ATAD3B|CALML6|CDK11A|CDK11B|CFAP74|FAAP20|FNDC10|GABRD|GNB1|GNB1-DT|HES5|LOC100996583|LOC105378586|LOC112268219|LOC112577524|LOC112577525|LOC121677382|LOC121677383|LOC121967044|LOC121967045|LOC121967046|LOC121967047|LOC121967048|LOC121967049|LOC121967050|LOC121967051|LOC124903827|LOC126805578|LOC126805579|LOC126805580|LOC126805581|LOC126805582|LOC129388422|LOC129388423|LOC129929131|…		See cases	VCV000058319	1	1417658 - 3069100	1	1482278 - 3152536	58319	72914			copy number loss		Pathogenic	Aug 12, 2011	criteria provided, single submitter
GRCh37/hg19 1p36.33-36.23(chr1:849466-8966102)x1	RNF207|RNF223|RPL22|SAMD11|SCNN1D|SDF4|SKI|SLC35E2A|SLC35E2B|SLC45A1|SMIM1|SSU72|TAS1R1|TAS1R3|THAP3|TMEM240|TMEM52|TMEM88B|TNFRSF14|TNFRSF18|TNFRSF25|TNFRSF4|TNFRSF9|TP73|TPRG1L|TTC34|TTLL10|UBE2J2|UTS2|VAMP3|VWA1|WRAP73|ZBTB48|ACAP3|ACOT7|ACTRT2|AGRN|AJAP1|ANKRD65|ARHGEF16|ATAD3A|ATAD3B|ATAD3C|AURKAIP1|B3GALT6|C1QTNF12|C1orf159|C1orf174|CALML6|CAMTA1|CCDC27|CCNL2|CDK11A|CDK11B|CEP104|CFAP74|CHD…		not specified	VCV003063233	1	849466 - 8966102			3063233	3223449			copy number loss		Pathogenic		criteria provided, single submitter
GRCh37/hg19 1p36.33-36.32(chr1:1182855-2431925)x1	TMEM88B|UBE2J2|VWA1|ACAP3|ANKRD65|ATAD3A|ATAD3B|ATAD3C|AURKAIP1|CALML6|CCNL2|CDK11A|CDK11B|CFAP74|CPTP|DVL1|FAAP20|FNDC10|GABRD|GNB1|INTS11|MIB2|MMP23B|MORN1|MRPL20|MXRA8|NADK|PEX10|PLCH2|PRKCZ|PUSL1|RER1|SCNN1D|SKI|SLC35E2A|SLC35E2B|SSU72|TAS1R3|TMEM240|TMEM52		not provided	VCV002685277	1	1182855 - 2431925			2685277	2846312			copy number loss		Likely pathogenic	Oct 30, 2022	criteria provided, single submitter
GRCh37/hg19 1p36.33-36.32(chr1:849467-3500877)x1	SCNN1D|SDF4|TTC34|TTLL10|TMEM52|TMEM88B|TNFRSF14|TNFRSF18|TNFRSF4|ACTRT2|AGRN|ACAP3|ANKRD65|ARHGEF16|ATAD3A|ATAD3B|ATAD3C|AURKAIP1|B3GALT6|C1QTNF12|C1orf159|CALML6|CCNL2|CDK11A|CDK11B|CFAP74|CPTP|DVL1|FAAP20|FNDC10|GABRD|GNB1|HES4|HES5|INTS11|ISG15|KLHL17|MEGF6|MIB2|MIR200A|MIR200B|MIR429|MIR551A|MMEL1|MMP23B|MORN1|MRPL20|MXRA8|NADK|NOC2L|PANK4|PEX10|PLCH2|PLEKHN1|PRDM16|PRKCZ|PRXL2B|PUSL1|RER1|R…		not provided	VCV002685266	1	849467 - 3500877			2685266	2846301			copy number loss		Pathogenic	Mar 14, 2023	criteria provided, single submitter
GRCh37/hg19 1p36.33-36.22(chr1:849467-9627901)x1	ACAP3|ACOT7|ACTRT2|AGRN|AJAP1|ANKRD65|ARHGEF16|ATAD3A|ATAD3B|ATAD3C|AURKAIP1|B3GALT6|C1QTNF12|C1orf159|C1orf174|CA6|CALML6|CAMTA1|CCDC27|CCNL2|CDK11A|CDK11B|CEP104|CFAP74|CHD5|CPTP|DFFB|DNAJC11|DVL1|ENO1|ENO1-AS1|ERRFI1|ESPN|FAAP20|FNDC10|GABRD|GNB1|GPR153|GPR157|H6PD|HES2|HES3|HES4|HES5|ICMT|INTS11|ISG15|KCNAB2|KLHL17|KLHL21|LRRC47|MEGF6|MIB2|MIR200A|MIR200B|MIR34A|MIR429|MIR551A|MMEL1|MMP23B|MO…		not provided	VCV002685244	1	849467 - 9627901			2685244	2846279			copy number loss		Pathogenic	Feb 13, 2023	criteria provided, single submitter
GRCh37/hg19 1p36.33(chr1:1569581-2005714)x1	CDK11B|CFAP74|GABRD|TMEM52|CALML6|CDK11A|GNB1|MMP23B|NADK|PRKCZ|SLC35E2A|SLC35E2B		not provided	VCV002640261	1	1569581 - 2005714			2640261	2812953			copy number loss		Likely pathogenic	Oct 1, 2023	criteria provided, single submitter
GRCh37/hg19 1p36.33-36.31(chr1:536777-6012896)x1	ACAP3|ACTRT2|AGRN|AJAP1|ANKRD65|ARHGEF16|ATAD3A|ATAD3B|ATAD3C|AURKAIP1|B3GALT6|C1QTNF12|C1orf159|C1orf174|CALML6|CCDC27|CCNL2|CDK11A|CDK11B|CEP104|CFAP74|CPTP|DFFB|DVL1|FAAP20|FNDC10|GABRD|GNB1|HES4|HES5|INTS11|ISG15|KLHL17|LRRC47|MEGF6|MIB2|MIR200A|MIR200B|MIR429|MIR551A|MMEL1|MMP23B|MORN1|MRPL20|MXRA8|NADK|NOC2L|NPHP4|OR4F16|PANK4|PEX10|PLCH2|PLEKHN1|PRDM16|PRKCZ|PRXL2B|PUSL1|RER1|RNF223|SAMD11…		not provided	VCV002570762	1	536777 - 6012896			2570762	2735720			copy number loss		Pathogenic	Jul 1, 2023	criteria provided, single submitter
GRCh37/hg19 1p36.33-36.32(chr1:1-2580976)x1	ACAP3|AGRN|ANKRD65|ATAD3A|ATAD3B|ATAD3C|AURKAIP1|B3GALT6|C1QTNF12|C1orf159|CALML6|CCNL2|CDK11A|CDK11B|CFAP74|CPTP|DVL1|FAAP20|FNDC10|GABRD|GNB1|HES4|HES5|INTS11|ISG15|KLHL17|MIB2|MIR200A|MIR200B|MIR429|MMEL1|MMP23B|MORN1|MRPL20|MXRA8|NADK|NOC2L|OR4F16|OR4F29|OR4F5|PANK4|PEX10|PLCH2|PLEKHN1|PRKCZ|PRXL2B|PUSL1|RER1|RNF223|SAMD11|SCNN1D|SDF4|SKI|SLC35E2A|SLC35E2B|SSU72|TAS1R3|TMEM240|TMEM52|TMEM88B|…		Chromosome 1p36 deletion syndrome	VCV002501007	1	1 - 2580976			2501007	2523902			copy number loss		Pathogenic		criteria provided, single submitter
GRCh37/hg19 1p36.33-36.22(chr1:849467-12448956)x1	ACAP3|ACOT7|ACTRT2|AGRN|AGTRAP|AJAP1|ANGPTL7|ANKRD65|ARHGEF16|ATAD3A|ATAD3B|ATAD3C|AURKAIP1|B3GALT6|C1QTNF12|C1orf127|C1orf159|C1orf167|C1orf174|CA6|CALML6|CAMTA1|CASZ1|CCDC27|CCNL2|CDK11A|CDK11B|CENPS|CENPS-CORT|CEP104|CFAP74|CHD5|CLCN6|CLSTN1|CORT|CPTP|CTNNBIP1|DFFA|DFFB|DISP3|DNAJC11|DRAXIN|DVL1|ENO1|ENO1-AS1|ERRFI1|ESPN|EXOSC10|FAAP20|FBXO2|FBXO44|FBXO6|FNDC10|GABRD|GNB1|GPR153|GPR157|H6PD|HE…		not provided	VCV001808634	1	849467 - 12448956			1808634	1865638			copy number loss		Pathogenic	Apr 13, 2022	criteria provided, single submitter
GRCh37/hg19 1p36.33-36.32(chr1:1335011-2302755)x1	ANKRD65|ATAD3A|ATAD3B|ATAD3C|CALML6|CDK11A|CDK11B|CFAP74|FAAP20|FNDC10|GABRD|GNB1|MIB2|MMP23B|MORN1|MRPL20|NADK|PRKCZ|SKI|SLC35E2A|SLC35E2B|SSU72|TMEM240|TMEM52|TMEM88B|VWA1		not provided	VCV001807780	1	1335011 - 2302755			1807780	1864784			copy number loss		Pathogenic	Oct 11, 2021	criteria provided, single submitter
GRCh37/hg19 1p36.33-36.32(chr1:849467-2972435)x1	ACAP3|ACTRT2|AGRN|ANKRD65|ATAD3A|ATAD3B|ATAD3C|AURKAIP1|B3GALT6|C1QTNF12|C1orf159|CALML6|CCNL2|CDK11A|CDK11B|CFAP74|CPTP|DVL1|FAAP20|FNDC10|GABRD|GNB1|HES4|HES5|INTS11|ISG15|KLHL17|MIB2|MIR200A|MIR200B|MIR429|MMEL1|MMP23B|MORN1|MRPL20|MXRA8|NADK|NOC2L|PANK4|PEX10|PLCH2|PLEKHN1|PRKCZ|PRXL2B|PUSL1|RER1|RNF223|SAMD11|SCNN1D|SDF4|SKI|SLC35E2A|SLC35E2B|SSU72|TAS1R3|TMEM240|TMEM52|TMEM88B|TNFRSF14|TNFR…		not provided	VCV001807723	1	849467 - 2972435			1807723	1864727			copy number loss		Pathogenic	Jul 26, 2021	criteria provided, single submitter
GRCh37/hg19 1p36.33-36.32(chr1:849466-2518608)x1	ACAP3|AGRN|ANKRD65|ATAD3A|ATAD3B|ATAD3C|AURKAIP1|B3GALT6|C1QTNF12|C1orf159|CALML6|CCNL2|CDK11A|CDK11B|CFAP74|CPTP|DVL1|FAAP20|FNDC10|GABRD|GNB1|HES4|HES5|INTS11|ISG15|KLHL17|MIB2|MIR200A|MIR200B|MIR429|MMP23B|MORN1|MRPL20|MXRA8|NADK|NOC2L|PANK4|PEX10|PLCH2|PLEKHN1|PRKCZ|PRXL2B|PUSL1|RER1|RNF223|SAMD11|SCNN1D|SDF4|SKI|SLC35E2A|SLC35E2B|SSU72|TAS1R3|TMEM240|TMEM52|TMEM88B|TNFRSF14|TNFRSF18|TNFRSF4|…		See cases	VCV001706500	1	849466 - 2518608			1706500	1704810			copy number loss		Pathogenic		no assertion criteria provided
GRCh37/hg19 1p36.33-36.22(chr1:849466-10258804)	GPR157|H6PD|HES2|SLC45A1|SPSB1|SSU72|TAS1R1|TAS1R3|THAP3|TMEM201|TMEM240|TMEM52|SMIM1|TNFRSF4|TMEM88B|TNFRSF14|TNFRSF18|TNFRSF25|HES5|ICMT|INTS11|ISG15|HES3|KCNAB2|KLHL17|KLHL21|LRRC47|LZIC|MEGF6|MIB2|MIR200A|HES4|ACAP3|ACOT7|ACTRT2|AGRN|AJAP1|ANKRD65|ARHGEF16|ATAD3A|ATAD3B|ATAD3C|AURKAIP1|B3GALT6|C1QTNF12|C1orf159|C1orf174|CA6|CALML6|CAMTA1|CCDC27|CCNL2|CDK11A|CDK11B|CEP104|CFAP74|CHD5|CLSTN1|CP…		Chromosome 1p36 deletion syndrome, proximal	VCV001703629	1	849466 - 10258804			1703629	1696020			copy number loss		Pathogenic		no assertion criteria provided
GRCh37/hg19 1p36.33-36.32(chr1:849466-4183006)	ACAP3|ACTRT2|AGRN|ATAD3B|ATAD3C|AURKAIP1|C1QTNF12|C1orf159|C1orf174|CALML6|CCDC27|CCNL2|CDK11A|ARHGEF16|ATAD3A|B3GALT6|ANKRD65|CDK11B|CEP104|CFAP74|CPTP|DFFB|DVL1|FAAP20|FNDC10|GABRD|GNB1|HES4|HES5|INTS11|ISG15|KLHL17|LRRC47|MEGF6|MIB2|MIR200A|MIR200B|MIR429|MIR551A|MMEL1|MMP23B|MORN1|MRPL20|MXRA8|NADK|NOC2L|PANK4|PEX10|PLCH2|PLEKHN1|PRDM16|PRKCZ|PRXL2B|PUSL1|RER1|RNF223|SAMD11|SCNN1D|SDF4|SKI|SL…		Chromosome 1p36 deletion syndrome	VCV001703628	1	849466 - 4183006			1703628	1696019			copy number loss		Pathogenic		no assertion criteria provided
GRCh37/hg19 1p36.33-36.31(chr1:849466-5625566)	TNFRSF18|TNFRSF4|WRAP73|ACAP3|ACTRT2|AGRN|AJAP1|ANKRD65|ARHGEF16|ATAD3A|ATAD3B|ATAD3C|AURKAIP1|B3GALT6|C1QTNF12|C1orf159|C1orf174|CALML6|CCDC27|CCNL2|CDK11A|CDK11B|CEP104|CFAP74|CPTP|DFFB|DVL1|FAAP20|FNDC10|GABRD|GNB1|HES4|HES5|INTS11|ISG15|KLHL17|LRRC47|MEGF6|MIB2|MIR200A|MIR200B|MIR429|MIR551A|MMEL1|MMP23B|MORN1|MRPL20|MXRA8|NADK|NOC2L|PANK4|PEX10|PLCH2|PLEKHN1|PRDM16|PRKCZ|PRXL2B|PUSL1|RER1|RN…		Chromosome 1p36 deletion syndrome	VCV001703627	1	849466 - 5625566			1703627	1696018			copy number loss		Pathogenic		no assertion criteria provided
GRCh37/hg19 1p36.33-36.23(chr1:834101-7930605)x1	DNAJC11|DVL1|MIR200A|MIR200B|MMEL1|MMP23B|MORN1|GABRD|ICMT|INTS11|ISG15|MIR429|MIR551A|ESPN|FAAP20|FNDC10|KCNAB2|KLHL17|KLHL21|LRRC47|MEGF6|MIB2|ACAP3|ACOT7|ACTRT2|AGRN|AJAP1|ANKRD65|ARHGEF16|ATAD3A|ATAD3B|ATAD3C|AURKAIP1|B3GALT6|C1QTNF12|C1orf159|C1orf174|CALML6|CAMTA1|CCDC27|CCNL2|CDK11A|CDK11B|CEP104|CFAP74|CHD5|CPTP|DFFB|GNB1|GPR153|HES2|HES3|HES4|HES5|MRPL20|MXRA8|NADK|NOC2L|NOL9|NPHP4|PANK4…		Chromosome 1p36 deletion syndrome	VCV001341993	1	834101 - 7930605			1341993	1333391			copy number loss		Pathogenic	Feb 2, 2022	criteria provided, single submitter
GRCh37/hg19 1p36.33-36.32(chr1:849466-2621542)x1	ACAP3|AGRN|ANKRD65|ATAD3A|ATAD3B|ATAD3C|AURKAIP1|B3GALT6|C1QTNF12|C1orf159|CALML6|CCNL2|CDK11A|CDK11B|CFAP74|CPTP|DVL1|FAAP20|FNDC10|GABRD|GNB1|HES4|HES5|INTS11|ISG15|KLHL17|MIB2|MIR200A|MIR200B|MIR429|MMEL1|MMP23B|MORN1|MRPL20|MXRA8|NADK|NOC2L|PANK4|PEX10|PLCH2|PLEKHN1|PRKCZ|PRXL2B|PUSL1|RER1|RNF223|SAMD11|SCNN1D|SDF4|SKI|SLC35E2A|SLC35E2B|SSU72|TAS1R3|TMEM240|TMEM52|TMEM88B|TNFRSF14|TNFRSF18|TN…		not provided	VCV001341246	1	849466 - 2621542			1341246	1332454			copy number loss		Pathogenic	Feb 1, 2021	no assertion criteria provided
GRCh37/hg19 1p36.33-36.13(chr1:849466-17525065)x1	AJAP1|KAZN|KCNAB2|SPATA21|TMEM52|TMEM82|TMEM88B|TNFRSF14|TNFRSF18|LINC01783|LRRC38|LRRC47|LZIC|MAD2L2|MASP2|MEGF6|MFAP2|MIR429|MIR551A|KLHL17|KLHL21|TMEM51|TNFRSF4|TNFRSF8|TNFRSF9|TTLL10|ANGPTL7|AURKAIP1|ATAD3B|ATAD3C|ATP13A2|B3GALT6|ANKRD65|ARHGEF16|ARHGEF19|ATAD3A|TNFRSF1B|TNFRSF25|KIAA2013|KIF1B|AADACL3|AADACL4|ACAP3|ACOT7|ACTRT2|AGMAT|AGRN|AGTRAP|C1QTNF12|C1orf127|C1orf159|C1orf167|C1orf174|C…		not provided	VCV001340028	1	849466 - 17525065			1340028	1331236			copy number loss		Pathogenic	Mar 1, 2021	no assertion criteria provided
GRCh37/hg19 1p36.33-36.32(chr1:753552-4034574)x1	ACAP3|ACTRT2|AGRN|ANKRD65|ARHGEF16|ATAD3A|ATAD3B|ATAD3C|AURKAIP1|B3GALT6|C1QTNF12|C1orf159|C1orf174|CALML6|CCDC27|CCNL2|CDK11A|CDK11B|CEP104|CFAP74|CPTP|DFFB|DVL1|FAAP20|FNDC10|GABRD|GNB1|HES4|HES5|INTS11|ISG15|KLHL17|LRRC47|MEGF6|MIB2|MIR200A|MIR200B|MIR429|MIR551A|MMEL1|MMP23B|MORN1|MRPL20|MXRA8|NADK|NOC2L|PANK4|PEX10|PLCH2|PLEKHN1|PRDM16|PRKCZ|PRXL2B|PUSL1|RER1|RNF223|SAMD11|SCNN1D|SDF4|SKI|SL…		not provided	VCV001328099	1	753552 - 4034574			1328099	1318718			copy number loss		Pathogenic	Sep 10, 2021	criteria provided, single submitter
GRCh37/hg19 1p36.33(chr1:753462-1717335)x1	TMEM88B|TNFRSF18|VWA1|TNFRSF4|TTLL10|UBE2J2|ACAP3|AGRN|ANKRD65|ATAD3A|ATAD3B|ATAD3C|AURKAIP1|B3GALT6|C1QTNF12|C1orf159|CCNL2|CDK11A|CDK11B|CPTP|DVL1|FNDC10|GNB1|HES4|INTS11|ISG15|KLHL17|MIB2|MIR200A|MIR200B|MIR429|MMP23B|MRPL20|MXRA8|NADK|NOC2L|PLEKHN1|PUSL1|RNF223|SAMD11|SCNN1D|SDF4|SLC35E2A|SLC35E2B|SSU72|TAS1R3|TMEM240		not provided	VCV000988904	1	753462 - 1717335			988904	976844			copy number loss		Pathogenic	Mar 20, 2019	criteria provided, single submitter
GRCh37/hg19 1p36.33-36.31(chr1:1-5592835)x1	ACAP3|ACTRT2|AGRN|AJAP1|ANKRD65|ARHGEF16|ATAD3A|ATAD3B|ATAD3C|AURKAIP1|B3GALT6|C1QTNF12|C1orf159|C1orf174|CALML6|CCDC27|CCNL2|CDK11A|CDK11B|CEP104|CFAP74|CPTP|DFFB|DVL1|FAAP20|FNDC10|GABRD|GNB1|HES4|HES5|INTS11|ISG15|KLHL17|LRRC47|MEGF6|MIB2|MIR200A|MIR200B|MIR429|MIR551A|MMEL1|MMP23B|MORN1|MRPL20|MXRA8|NADK|NOC2L|OR4F16|OR4F29|OR4F5|PANK4|PEX10|PLCH2|PLEKHN1|PRDM16|PRKCZ|PRXL2B|PUSL1|RER1|RNF223…		not provided	VCV000980940	1	1 - 5592835			980940	969018			copy number loss		Pathogenic	Apr 9, 2020	no assertion criteria provided
GRCh37/hg19 1p36.33(chr1:849466-1976788)x1	ATAD3B|ATAD3C|AURKAIP1|B3GALT6|C1QTNF12|C1orf159|CALML6|CCNL2|CDK11A|CDK11B|CFAP74|CPTP|DVL1|FNDC10|GABRD|GNB1|HES4|INTS11|ISG15|KLHL17|MIB2|MIR200A|MIR200B|MIR429|MMP23B|MRPL20|MXRA8|NADK|NOC2L|PLEKHN1|PUSL1|RNF223|SAMD11|SCNN1D|SDF4|SLC35E2A|SLC35E2B|SSU72|TAS1R3|TMEM240|TMEM52|TMEM88B|TNFRSF18|TNFRSF4|TTLL10|UBE2J2|VWA1|ACAP3|AGRN|ANKRD65|ATAD3A		not provided	VCV000980936	1	849466 - 1976788			980936	969014			copy number loss		Pathogenic	Oct 15, 2019	no assertion criteria provided
GRCh37/hg19 1p36.33(chr1:849466-2033256)x1	ACAP3|AGRN|ANKRD65|ATAD3A|ATAD3B|ATAD3C|AURKAIP1|B3GALT6|C1QTNF12|C1orf159|CALML6|CCNL2|CDK11A|CDK11B|CFAP74|CPTP|DVL1|FNDC10|GABRD|GNB1|HES4|INTS11|ISG15|KLHL17|MIB2|MIR200A|MIR200B|MIR429|MMP23B|MRPL20|MXRA8|NADK|NOC2L|PLEKHN1|PRKCZ|PUSL1|RNF223|SAMD11|SCNN1D|SDF4|SLC35E2A|SLC35E2B|SSU72|TAS1R3|TMEM240|TMEM52|TMEM88B|TNFRSF18|TNFRSF4|TTLL10|UBE2J2|VWA1		not provided	VCV000980935	1	849466 - 2033256			980935	969013			copy number loss		Pathogenic	Feb 5, 2020	no assertion criteria provided
GRCh37/hg19 1p36.33(chr1:849466-1806659)x1	ACAP3|AGRN|ANKRD65|ATAD3A|ATAD3B|ATAD3C|AURKAIP1|B3GALT6|C1QTNF12|C1orf159|CCNL2|CDK11A|CDK11B|CPTP|DVL1|FNDC10|GNB1|HES4|INTS11|ISG15|KLHL17|MIB2|MIR200A|MIR200B|MIR429|MMP23B|MRPL20|MXRA8|NADK|NOC2L|PLEKHN1|PUSL1|RNF223|SAMD11|SCNN1D|SDF4|SLC35E2A|SLC35E2B|SSU72|TAS1R3|TMEM240|TMEM88B|TNFRSF18|TNFRSF4|TTLL10|UBE2J2|VWA1		not provided	VCV000980934	1	849466 - 1806659			980934	969012			copy number loss		Likely pathogenic	Jan 6, 2020	no assertion criteria provided
GRCh37/hg19 1p36.33(chr1:1717581-1910879)x1	CALML6|CFAP74|GNB1|TMEM52		not provided	VCV000980933	1	1717581 - 1910879			980933	969011			copy number loss		Likely pathogenic	Sep 12, 2019	no assertion criteria provided
GRCh37/hg19 1p36.33-36.23(chr1:762080-7309686)	PUSL1|RER1|RNF207|TAS1R3|THAP3|TMEM240|RNF223|RPL22|SAMD11|TMEM52|TMEM88B|TNFRSF14|TNFRSF18|TNFRSF25|TNFRSF4|WRAP73|ZBTB48|SCNN1D|SDF4|CALML6|CAMTA1|ARHGEF16|ATAD3A|ATAD3B|C1QTNF12|C1orf159|C1orf174|CCDC27|CCNL2|CDK11A|AGRN|AJAP1|ANKRD65|ATAD3C|AURKAIP1|B3GALT6|ACTRT2|ACAP3|ACOT7|CDK11B|CEP104|CFAP74|CHD5|CPTP|DFFB|DNAJC11|DVL1|ESPN|FAAP20|FNDC10|GABRD|GNB1|GPR153|HES2|HES3|HES4|HES5|ICMT|INTS11|…		Harel-Yoon syndrome	VCV000976729	1	762080 - 7309686			976729	964912			copy number loss		Likely pathogenic	Dec 11, 2017	criteria provided, single submitter
GRCh37/hg19 1p36.33-36.32(chr1:849466-4829059)x1	ACAP3|ACTRT2|AGRN|AJAP1|ANKRD65|ARHGEF16|ATAD3A|ATAD3B|ATAD3C|AURKAIP1|B3GALT6|C1QTNF12|C1orf159|C1orf174|CALML6|CCDC27|CCNL2|CDK11A|CDK11B|CEP104|CFAP74|CPTP|DFFB|DVL1|FAAP20|FNDC10|GABRD|GNB1|HES4|HES5|INTS11|ISG15|KLHL17|LRRC47|MEGF6|MIB2|MIR200A|MIR200B|MIR429|MIR551A|MMEL1|MMP23B|MORN1|MRPL20|MXRA8|NADK|NOC2L|PANK4|PEX10|PLCH2|PLEKHN1|PRDM16|PRKCZ|PRXL2B|PUSL1|RER1|RNF223|SAMD11|SCNN1D|SDF4|…		not provided	VCV000814048	1	849466 - 4829059			814048	802261			copy number loss		Pathogenic	Sep 26, 2018	no assertion criteria provided
GRCh37/hg19 1p36.33-36.31(chr1:849466-5625566)x1	ACAP3|ACTRT2|AGRN|AJAP1|ANKRD65|ARHGEF16|ATAD3A|ATAD3B|ATAD3C|AURKAIP1|B3GALT6|C1QTNF12|C1orf159|C1orf174|CALML6|CCDC27|CCNL2|CDK11A|CDK11B|CEP104|CFAP74|CPTP|DFFB|DVL1|FAAP20|FNDC10|GABRD|GNB1|HES4|HES5|INTS11|ISG15|KLHL17|LRRC47|MEGF6|MIB2|MIR200A|MIR200B|MIR429|MIR551A|MMEL1|MMP23B|MORN1|MRPL20|MXRA8|NADK|NOC2L|PANK4|PEX10|PLCH2|PLEKHN1|PRDM16|PRKCZ|PRXL2B|PUSL1|RER1|RNF223|SAMD11|SCNN1D|SDF4|…		not provided	VCV000814047	1	849466 - 5625566			814047	802260			copy number loss		Pathogenic	Jul 26, 2018	no assertion criteria provided
GRCh37/hg19 1p36.33-36.31(chr1:849466-6002955)x1	ACAP3|ACTRT2|AGRN|AJAP1|ANKRD65|ARHGEF16|ATAD3A|ATAD3B|ATAD3C|AURKAIP1|B3GALT6|C1QTNF12|C1orf159|C1orf174|CALML6|CCDC27|CCNL2|CDK11A|CDK11B|CEP104|CFAP74|CPTP|DFFB|DVL1|FAAP20|FNDC10|GABRD|GNB1|HES4|HES5|INTS11|ISG15|KLHL17|LRRC47|MEGF6|MIB2|MIR200A|MIR200B|MIR429|MIR551A|MMEL1|MMP23B|MORN1|MRPL20|MXRA8|NADK|NOC2L|NPHP4|PANK4|PEX10|PLCH2|PLEKHN1|PRDM16|PRKCZ|PRXL2B|PUSL1|RER1|RNF223|SAMD11|SCNN1D…		not provided	VCV000814046	1	849466 - 6002955			814046	802259			copy number loss		Pathogenic	Jul 5, 2018	no assertion criteria provided
GRCh37/hg19 1p36.33-36.23(chr1:849466-7786545)x1	ACAP3|ACOT7|ACTRT2|AGRN|AJAP1|ANKRD65|ARHGEF16|ATAD3A|ATAD3B|ATAD3C|AURKAIP1|B3GALT6|C1QTNF12|C1orf159|C1orf174|CALML6|CAMTA1|CCDC27|CCNL2|CDK11A|CDK11B|CEP104|CFAP74|CHD5|CPTP|DFFB|DNAJC11|DVL1|ESPN|FAAP20|FNDC10|GABRD|GNB1|GPR153|HES2|HES3|HES4|HES5|ICMT|INTS11|ISG15|KCNAB2|KLHL17|KLHL21|LRRC47|MEGF6|MIB2|MIR200A|MIR200B|MIR429|MIR551A|MMEL1|MMP23B|MORN1|MRPL20|MXRA8|NADK|NOC2L|NOL9|NPHP4|PANK4…		not provided	VCV000814045	1	849466 - 7786545			814045	802258			copy number loss		Pathogenic	Feb 7, 2019	no assertion criteria provided
GRCh37/hg19 1p36.33-36.32(chr1:1723651-3444846)x1	TNFRSF14|TTC34|ARHGEF16|ACTRT2|CALML6|CFAP74|FAAP20|GABRD|GNB1|HES5|MEGF6|MMEL1|MORN1|PANK4|PEX10|PLCH2|PRDM16|PRKCZ|PRXL2B|RER1|SKI|TMEM52		Chromosome 1p36 deletion syndrome	VCV000666432	1	1723651 - 3444846			666432	653991			copy number loss		Pathogenic	Jan 1, 2019	criteria provided, single submitter
GRCh37/hg19 1p36.33-36.22(chr1:82154-11784118)x1	ACAP3|ACOT7|ACTRT2|AGRN|AJAP1|ANGPTL7|ANKRD65|ARHGEF16|ATAD3A|ATAD3B|ATAD3C|AURKAIP1|B3GALT6|C1QTNF12|C1orf127|C1orf159|C1orf174|CA6|CALML6|CAMTA1|CENPS-CORT|CASZ1|CCDC27|CCNL2|CDK11A|CDK11B|CENPS|CEP104|CFAP74|CHD5|CLSTN1|CORT|CPTP|CTNNBIP1|DFFA|DFFB|DISP3|DNAJC11|DRAXIN|DVL1|ENO1|ENO1-AS1|ERRFI1|ESPN|EXOSC10|FAAP20|FBXO2|FBXO44|FBXO6|FNDC10|GABRD|GNB1|GPR153|GPR157|H6PD|HES2|HES3|HES4|HES5|ICMT…		See cases	VCV000638124	1	82154 - 11784118			638124	625945			copy number loss		Pathogenic	Oct 22, 2018	criteria provided, single submitter
GRCh37/hg19 1p36.33-36.23(chr1:82154-7637060)x1	ACAP3|ACOT7|ACTRT2|AGRN|AJAP1|ANKRD65|ARHGEF16|ATAD3A|ATAD3B|ATAD3C|AURKAIP1|B3GALT6|C1QTNF12|C1orf159|C1orf174|CALML6|CAMTA1|CCDC27|CCNL2|CDK11A|CDK11B|CEP104|CFAP74|CHD5|CPTP|DFFB|DNAJC11|DVL1|ESPN|FAAP20|FNDC10|GABRD|GNB1|GPR153|HES2|HES3|HES4|HES5|ICMT|INTS11|ISG15|KCNAB2|KLHL17|KLHL21|LRRC47|MEGF6|MIB2|MIR200A|MIR200B|MIR429|MIR551A|MMEL1|MMP23B|MORN1|MRPL20|MXRA8|NADK|NOC2L|NOL9|NPHP4|OR4F1…		See cases	VCV000638116	1	82154 - 7637060			638116	625937			copy number loss		Pathogenic	Sep 19, 2018	criteria provided, single submitter
GRCh37/hg19 1p36.33-36.32(chr1:568708-2567832)	CFAP74|CPTP|DVL1|FAAP20|FNDC10|MIB2|MIR200A|MMEL1|MMP23B|MORN1|MRPL20|GABRD|MIR200B|MIR429|MXRA8|NADK|ACAP3|AGRN|ANKRD65|ATAD3A|ATAD3B|ATAD3C|AURKAIP1|B3GALT6|C1QTNF12|C1orf159|CALML6|CCNL2|CDK11A|CDK11B|GNB1|HES4|HES5|INTS11|ISG15|KLHL17|NOC2L|OR4F16|PANK4|PEX10|PLCH2|PLEKHN1|PRKCZ|PRXL2B|PUSL1|RER1|RNF223|SAMD11|SCNN1D|SDF4|SKI|SLC35E2A|SLC35E2B|SSU72|TAS1R3|TMEM240|TMEM52|TMEM88B|TNFRSF14|TNFR…		Chromosome 1p36 deletion syndrome	VCV000625768	1	568708 - 2567832			625768	614072			copy number loss		Pathogenic	Nov 1, 2018	criteria provided, single submitter
GRCh37/hg19 1p36.33-36.32(chr1:568708-3662949)	MEGF6|MIB2|MIR200A|MIR200B|MIR429|MMP23B|MORN1|MRPL20|OR4F16|PANK4|PEX10|PLCH2|PRKCZ|PRXL2B|PUSL1|MIR551A|MMEL1|MXRA8|NADK|NOC2L|PLEKHN1|PRDM16|ACAP3|ACTRT2|AGRN|ANKRD65|ARHGEF16|ATAD3A|ATAD3B|ATAD3C|AURKAIP1|B3GALT6|C1QTNF12|C1orf159|CALML6|CCNL2|CDK11A|CDK11B|CFAP74|CPTP|DVL1|FAAP20|FNDC10|GABRD|GNB1|HES4|HES5|INTS11|ISG15|KLHL17|RER1|RNF223|SAMD11|SCNN1D|SDF4|SKI|SLC35E2A|SLC35E2B|SSU72|TAS1R3…		Chromosome 1p36 deletion syndrome	VCV000625767	1	568708 - 3662949			625767	614071			copy number loss		Pathogenic	Nov 1, 2018	criteria provided, single submitter
GRCh37/hg19 1p36.33-36.31(chr1:823964-6828363)	ANKRD65|ARHGEF16|PANK4|PEX10|PHF13|SAMD11|SCNN1D|PLEKHN1|PRDM16|PRKCZ|RER1|RNF207|RNF223|RPL22|PLCH2|PLEKHG5|SDF4|SKI|C1QTNF12|C1orf159|C1orf174|CALML6|CCDC27|CCNL2|CDK11A|CDK11B|CEP104|CFAP74|FAAP20|PRXL2B|PUSL1|SLC35E2A|SLC35E2B|ATAD3A|AURKAIP1|B3GALT6|ATAD3B|ATAD3C|ACAP3|ACOT7|ACTRT2|AGRN|AJAP1|CHD5|CPTP|DFFB|DNAJC11|DVL1|ESPN|FNDC10|GABRD|GNB1|GPR153|HES2|HES3|HES4|HES5|ICMT|INTS11|ISG15|KCNA…		Chromosome 1p36 deletion syndrome	VCV000625766	1	823964 - 6828363			625766	614070			copy number loss		Pathogenic	Nov 1, 2018	criteria provided, single submitter
GRCh37/hg19 1p36.33(chr1:1129318-2040693)x1	MRPL20|ATAD3B|DVL1|TMEM52|TNFRSF4|PUSL1|GABRD|TMEM240|CALML6|SDF4|UBE2J2|CPTP|ANKRD65|CDK11B|PRKCZ|TMEM88B|ATAD3C|TTLL10|TAS1R3|TNFRSF18|CDK11A|SLC35E2B|SLC35E2A|MMP23B|CCNL2|CFAP74|B3GALT6|C1QTNF12|GNB1|ATAD3A|INTS11|MXRA8|MIB2|FNDC10|SSU72|VWA1|ACAP3|SCNN1D|NADK|AURKAIP1		not provided	VCV000565060	1	1129318 - 2040693			565060	556244			copy number loss		Likely pathogenic	Mar 29, 2018	no assertion criteria provided
GRCh37/hg19 1p36.33-36.23(chr1:849466-7305595)x1	ACAP3|ACOT7|ACTRT2|AGRN|AJAP1|ANKRD65|ARHGEF16|ATAD3A|ATAD3B|ATAD3C|AURKAIP1|B3GALT6|C1QTNF12|C1orf159|C1orf174|CALML6|CAMTA1|CCDC27|CCNL2|CDK11A|CDK11B|CEP104|CFAP74|CHD5|CPTP|DFFB|DNAJC11|DVL1|ESPN|FAAP20|FNDC10|GABRD|GNB1|GPR153|HES2|HES3|HES4|HES5|ICMT|INTS11|ISG15|KCNAB2|KLHL17|KLHL21|LRRC47|MEGF6|MIB2|MIR200A|MIR200B|MIR429|MIR551A|MMEL1|MMP23B|MORN1|MRPL20|MXRA8|NADK|NOC2L|NOL9|NPHP4|PANK4…		not provided	VCV000565059	1	849466 - 7305595			565059	556243			copy number loss		Pathogenic	May 16, 2018	no assertion criteria provided
GRCh37/hg19 1p36.33-36.32(chr1:849466-4262915)x1	ACAP3|ACTRT2|AGRN|ANKRD65|ARHGEF16|ATAD3A|ATAD3B|ATAD3C|AURKAIP1|B3GALT6|C1QTNF12|C1orf159|C1orf174|CALML6|CCDC27|CCNL2|CDK11A|CDK11B|CEP104|CFAP74|CPTP|DFFB|DVL1|FAAP20|FNDC10|GABRD|GNB1|HES4|HES5|INTS11|ISG15|KLHL17|LRRC47|MEGF6|MIB2|MIR200A|MIR200B|MIR429|MIR551A|MMEL1|MMP23B|MORN1|MRPL20|MXRA8|NADK|NOC2L|PANK4|PEX10|PLCH2|PLEKHN1|PRDM16|PRKCZ|PRXL2B|PUSL1|RER1|RNF223|SAMD11|SCNN1D|SDF4|SKI|SL…		not provided	VCV000565058	1	849466 - 4262915			565058	556242			copy number loss		Pathogenic	Apr 3, 2018	no assertion criteria provided
GRCh37/hg19 1p36.33(chr1:849466-2240632)x1	PRKCZ|NADK|HES4|INTS11|NOC2L|AURKAIP1|AGRN|CFAP74|GNB1|MIR200B|CCNL2|MIR429|DVL1|SDF4|KLHL17|SKI|CDK11B|SAMD11|B3GALT6|TTLL10|CDK11A|TMEM88B|SLC35E2A|TNFRSF18|ATAD3B|SCNN1D|GABRD|ISG15|CALML6|PUSL1|CPTP|RNF223|SLC35E2B|MIB2|FNDC10|TMEM240|UBE2J2|MMP23B|FAAP20|C1orf159|TMEM52|TNFRSF4|ANKRD65|ATAD3A|PLEKHN1|ACAP3|TAS1R3|VWA1|MIR200A|SSU72|C1QTNF12|MRPL20|ATAD3C|MXRA8		not provided	VCV000565057	1	849466 - 2240632			565057	556241			copy number loss		Pathogenic	May 8, 2018	no assertion criteria provided
GRCh37/hg19 1p36.33-36.31(chr1:834101-6076140)	CCDC27|MIR200B|MIR429|MIR551A|SDF4|TMEM88B|TNFRSF14|TNFRSF18|TNFRSF4|TMEM52|NADK|NOC2L|NPHP4|PANK4|PEX10|MMP23B|MORN1|MRPL20|PLCH2|PLEKHN1|PRDM16|PRKCZ|MXRA8|TMEM240|CCNL2|CDK11A|HES4|HES5|INTS11|ISG15|CPTP|DFFB|CDK11B|DVL1|FAAP20|FNDC10|GABRD|GNB1|CEP104|CFAP74|WRAP73|ANKRD65|ARHGEF16|ATAD3A|ATAD3B|ATAD3C|MMEL1|ACAP3|ACTRT2|AGRN|AJAP1|AURKAIP1|B3GALT6|C1QTNF12|C1orf159|C1orf174|CALML6|KCNAB2|KLH…		Primary dilated cardiomyopathy|Hearing abnormality|Hypotonia	VCV000523269	1	834101 - 6076140			523269	514185			copy number loss		Pathogenic	Jan 1, 2017	criteria provided, single submitter
GRCh37/hg19 1p36.33-36.23(chr1:849466-8901938)x1	ACAP3|ACOT7|ACTRT2|AGRN|AJAP1|ANKRD65|ARHGEF16|ATAD3A|ATAD3B|ATAD3C|AURKAIP1|B3GALT6|C1QTNF12|C1orf159|C1orf174|CALML6|CAMTA1|CCDC27|CCNL2|CDK11A|CDK11B|CEP104|CFAP74|CHD5|CPTP|DFFB|DNAJC11|DVL1|ERRFI1|ESPN|FAAP20|FNDC10|GABRD|GNB1|GPR153|HES2|HES3|HES4|HES5|ICMT|INTS11|ISG15|KCNAB2|KLHL17|KLHL21|LRRC47|MEGF6|MIB2|MIR200A|MIR200B|MIR429|MIR551A|MMEL1|MMP23B|MORN1|MRPL20|MXRA8|NADK|NOC2L|NOL9|NPHP…		See cases	VCV000443883	1	849466 - 8901938			443883	437545			copy number loss		Pathogenic	Aug 15, 2014	no assertion criteria provided
GRCh37/hg19 1p36.33-36.32(chr1:849466-2330338)x1	ACAP3|AGRN|ANKRD65|ATAD3A|ATAD3B|ATAD3C|AURKAIP1|B3GALT6|C1QTNF12|C1orf159|CALML6|CCNL2|CDK11A|CDK11B|CFAP74|CPTP|DVL1|FAAP20|FNDC10|GABRD|GNB1|HES4|INTS11|ISG15|KLHL17|MIB2|MIR200A|MIR200B|MIR429|MMP23B|MORN1|MRPL20|MXRA8|NADK|NOC2L|PLEKHN1|PRKCZ|PUSL1|RER1|RNF223|SAMD11|SCNN1D|SDF4|SKI|SLC35E2A|SLC35E2B|SSU72|TAS1R3|TMEM240|TMEM52|TMEM88B|TNFRSF18|TNFRSF4|TTLL10|UBE2J2|VWA1		See cases	VCV000443771	1	849466 - 2330338			443771	437433			copy number loss		Pathogenic	Aug 15, 2014	no assertion criteria provided
GRCh37/hg19 1p36.33-36.32(chr1:849466-4048535)x1	ACAP3|ACTRT2|AGRN|ANKRD65|ARHGEF16|ATAD3A|ATAD3B|ATAD3C|AURKAIP1|B3GALT6|C1QTNF12|C1orf159|C1orf174|CALML6|CCDC27|CCNL2|CDK11A|CDK11B|CEP104|CFAP74|CPTP|DFFB|DVL1|FAAP20|FNDC10|GABRD|GNB1|HES4|HES5|INTS11|ISG15|KLHL17|LRRC47|MEGF6|MIB2|MIR200A|MIR200B|MIR429|MIR551A|MMEL1|MMP23B|MORN1|MRPL20|MXRA8|NADK|NOC2L|PANK4|PEX10|PLCH2|PLEKHN1|PRDM16|PRKCZ|PRXL2B|PUSL1|RER1|RNF223|SAMD11|SCNN1D|SDF4|SKI|SL…		See cases	VCV000443517	1	849466 - 4048535			443517	437179			copy number loss		Pathogenic	Jun 23, 2014	no assertion criteria provided
GRCh37/hg19 1p36.33-36.23(chr1:849466-7637060)x1	ACAP3|ACOT7|ACTRT2|AGRN|AJAP1|ANKRD65|ARHGEF16|ATAD3A|ATAD3B|ATAD3C|AURKAIP1|B3GALT6|C1QTNF12|C1orf159|C1orf174|CALML6|CAMTA1|CCDC27|CCNL2|CDK11A|CDK11B|CEP104|CFAP74|CHD5|CPTP|DFFB|DNAJC11|DVL1|ESPN|FAAP20|FNDC10|GABRD|GNB1|GPR153|HES2|HES3|HES4|HES5|ICMT|INTS11|ISG15|KCNAB2|KLHL17|KLHL21|LRRC47|MEGF6|MIB2|MIR200A|MIR200B|MIR429|MIR551A|MMEL1|MMP23B|MORN1|MRPL20|MXRA8|NADK|NOC2L|NOL9|NPHP4|PANK4…		See cases	VCV000443478	1	849466 - 7637060			443478	437140			copy number loss		Pathogenic	Jun 22, 2015	no assertion criteria provided
GRCh37/hg19 1p36.33-36.32(chr1:849466-5352492)x1	ACAP3|ACTRT2|AGRN|AJAP1|ANKRD65|ARHGEF16|ATAD3A|ATAD3B|ATAD3C|AURKAIP1|B3GALT6|C1QTNF12|C1orf159|C1orf174|CALML6|CCDC27|CCNL2|CDK11A|CDK11B|CEP104|CFAP74|CPTP|DFFB|DVL1|FAAP20|FNDC10|GABRD|GNB1|HES4|HES5|INTS11|ISG15|KLHL17|LRRC47|MEGF6|MIB2|MIR200A|MIR200B|MIR429|MIR551A|MMEL1|MMP23B|MORN1|MRPL20|MXRA8|NADK|NOC2L|PANK4|PEX10|PLCH2|PLEKHN1|PRDM16|PRKCZ|PRXL2B|PUSL1|RER1|RNF223|SAMD11|SCNN1D|SDF4|…		See cases	VCV000443250	1	849466 - 5352492			443250	436912			copy number loss		Pathogenic	Mar 31, 2015	no assertion criteria provided
GRCh37/hg19 1p36.33-36.32(chr1:849466-2554275)x1	ACAP3|AGRN|ANKRD65|ATAD3A|ATAD3B|ATAD3C|AURKAIP1|B3GALT6|C1QTNF12|C1orf159|CALML6|CCNL2|CDK11A|CDK11B|CFAP74|CPTP|DVL1|FAAP20|FNDC10|GABRD|GNB1|HES4|HES5|INTS11|ISG15|KLHL17|MIB2|MIR200A|MIR200B|MIR429|MMEL1|MMP23B|MORN1|MRPL20|MXRA8|NADK|NOC2L|PANK4|PEX10|PLCH2|PLEKHN1|PRKCZ|PRXL2B|PUSL1|RER1|RNF223|SAMD11|SCNN1D|SDF4|SKI|SLC35E2A|SLC35E2B|SSU72|TAS1R3|TMEM240|TMEM52|TMEM88B|TNFRSF14|TNFRSF18|TN…		See cases	VCV000443237	1	849466 - 2554275			443237	436899			copy number loss		Pathogenic	Sep 30, 2014	no assertion criteria provided
GRCh37/hg19 1p36.33-36.32(chr1:1415800-5007235)x1	ACTRT2|AJAP1|ARHGEF16|ATAD3A|ATAD3B|C1orf174|CALML6|CCDC27|CDK11A|CDK11B|CEP104|CFAP74|DFFB|FAAP20|FNDC10|GABRD|GNB1|HES5|LRRC47|MEGF6|MIB2|MIR551A|MMEL1|MMP23B|MORN1|NADK|PANK4|PEX10|PLCH2|PRDM16|PRKCZ|PRXL2B|RER1|SKI|SLC35E2A|SLC35E2B|SMIM1|SSU72|TMEM240|TMEM52|TNFRSF14|TP73|TPRG1L|TTC34|WRAP73		See cases	VCV000443115	1	1415800 - 5007235			443115	436777			copy number loss		Pathogenic	May 5, 2014	no assertion criteria provided
GRCh37/hg19 1p36.33-36.32(chr1:849466-2748837)x1	ACAP3|AGRN|ANKRD65|ATAD3A|ATAD3B|ATAD3C|AURKAIP1|B3GALT6|C1QTNF12|C1orf159|CALML6|CCNL2|CDK11A|CDK11B|CFAP74|CPTP|DVL1|FAAP20|FNDC10|GABRD|GNB1|HES4|HES5|INTS11|ISG15|KLHL17|MIB2|MIR200A|MIR200B|MIR429|MMEL1|MMP23B|MORN1|MRPL20|MXRA8|NADK|NOC2L|PANK4|PEX10|PLCH2|PLEKHN1|PRKCZ|PRXL2B|PUSL1|RER1|RNF223|SAMD11|SCNN1D|SDF4|SKI|SLC35E2A|SLC35E2B|SSU72|TAS1R3|TMEM240|TMEM52|TMEM88B|TNFRSF14|TNFRSF18|TN…		See cases	VCV000443012	1	849466 - 2748837			443012	436674			copy number loss		Pathogenic	Jul 18, 2014	no assertion criteria provided
GRCh37/hg19 1p36.33-36.31(chr1:849466-6505278)x1	ACAP3|ACOT7|ACTRT2|AGRN|AJAP1|ANKRD65|ARHGEF16|ATAD3A|ATAD3B|ATAD3C|AURKAIP1|B3GALT6|C1QTNF12|C1orf159|C1orf174|CALML6|CCDC27|CCNL2|CDK11A|CDK11B|CEP104|CFAP74|CHD5|CPTP|DFFB|DVL1|ESPN|FAAP20|FNDC10|GABRD|GNB1|GPR153|HES2|HES3|HES4|HES5|ICMT|INTS11|ISG15|KCNAB2|KLHL17|LRRC47|MEGF6|MIB2|MIR200A|MIR200B|MIR429|MIR551A|MMEL1|MMP23B|MORN1|MRPL20|MXRA8|NADK|NOC2L|NPHP4|PANK4|PEX10|PLCH2|PLEKHN1|PRDM16…		See cases	VCV000442919	1	849466 - 6505278			442919	436581			copy number loss		Pathogenic	Jun 3, 2014	no assertion criteria provided
GRCh37/hg19 1p36.33-36.32(chr1:849466-2607016)x1	ACAP3|AGRN|ANKRD65|ATAD3A|ATAD3B|ATAD3C|AURKAIP1|B3GALT6|C1QTNF12|C1orf159|CALML6|CCNL2|CDK11A|CDK11B|CFAP74|CPTP|DVL1|FAAP20|FNDC10|GABRD|GNB1|HES4|HES5|INTS11|ISG15|KLHL17|MIB2|MIR200A|MIR200B|MIR429|MMEL1|MMP23B|MORN1|MRPL20|MXRA8|NADK|NOC2L|PANK4|PEX10|PLCH2|PLEKHN1|PRKCZ|PRXL2B|PUSL1|RER1|RNF223|SAMD11|SCNN1D|SDF4|SKI|SLC35E2A|SLC35E2B|SSU72|TAS1R3|TMEM240|TMEM52|TMEM88B|TNFRSF14|TNFRSF18|TN…		See cases	VCV000442107	1	849466 - 2607016			442107	435769			copy number loss		Pathogenic	Apr 22, 2014	no assertion criteria provided
GRCh37/hg19 1p36.33-36.31(chr1:849466-6374209)x1	ACAP3|ACOT7|ACTRT2|AGRN|AJAP1|ANKRD65|ARHGEF16|ATAD3A|ATAD3B|ATAD3C|AURKAIP1|B3GALT6|C1QTNF12|C1orf159|C1orf174|CALML6|CCDC27|CCNL2|CDK11A|CDK11B|CEP104|CFAP74|CHD5|CPTP|DFFB|DVL1|FAAP20|FNDC10|GABRD|GNB1|GPR153|HES3|HES4|HES5|ICMT|INTS11|ISG15|KCNAB2|KLHL17|LRRC47|MEGF6|MIB2|MIR200A|MIR200B|MIR429|MIR551A|MMEL1|MMP23B|MORN1|MRPL20|MXRA8|NADK|NOC2L|NPHP4|PANK4|PEX10|PLCH2|PLEKHN1|PRDM16|PRKCZ|PRX…		See cases	VCV000441627	1	849466 - 6374209			441627	435289			copy number loss		Pathogenic	Jul 1, 2014	no assertion criteria provided
GRCh37/hg19 1p36.33(chr1:1538143-2140271)x1	PRKCZ|SLC35E2A|SLC35E2B|TMEM52|CALML6|CDK11A|CDK11B|CFAP74|FAAP20|GABRD|GNB1|MIB2|MMP23B|NADK		See cases	VCV000394133	1	1538143 - 2140271			394133	381026			copy number loss		Pathogenic		no assertion criteria provided
GRCh37/hg19 1p36.33-36.32(chr1:564424-3582058)x1	C1orf159|CALML6|CCNL2|CDK11A|CDK11B|CFAP74|CPTP|MIR200B|MIR429|MIR551A|MMEL1|MMP23B|MORN1|MRPL20|MXRA8|MEGF6|MIB2|DVL1|FAAP20|FNDC10|GABRD|MIR200A|ACAP3|ACTRT2|AGRN|ANKRD65|ARHGEF16|ATAD3A|ATAD3B|ATAD3C|AURKAIP1|B3GALT6|C1QTNF12|GNB1|HES4|HES5|INTS11|ISG15|KLHL17|NADK|NOC2L|OR4F16|PANK4|PEX10|PLCH2|PLEKHN1|PRDM16|PRKCZ|PRXL2B|PUSL1|RER1|RNF223|SAMD11|SCNN1D|SDF4|SKI|SLC35E2A|SLC35E2B|SSU72|TAS1R3…		See cases	VCV000394071	1	564424 - 3582058			394071	380964			copy number loss		Pathogenic		no assertion criteria provided
GRCh37/hg19 1p36.33(chr1:1477184-2239438)x1	CALML6|CDK11A|CDK11B|CFAP74|FAAP20|FNDC10|GABRD|GNB1|MIB2|MMP23B|NADK|PRKCZ|SKI|SLC35E2A|SLC35E2B|SSU72|TMEM52		See cases	VCV000393731	1	1477184 - 2239438			393731	380624			copy number loss		Likely pathogenic		no assertion criteria provided
GRCh37/hg19 1p36.33-36.32(chr1:874455-3177921)x1	ACAP3|ACTRT2|AGRN|ANKRD65|ATAD3A|ATAD3B|ATAD3C|AURKAIP1|B3GALT6|C1QTNF12|C1orf159|CALML6|CCNL2|CDK11A|CDK11B|CFAP74|CPTP|DVL1|FAAP20|FNDC10|GABRD|GNB1|HES4|HES5|INTS11|ISG15|KLHL17|MIB2|MIR200A|MIR200B|MIR429|MMEL1|MMP23B|MORN1|MRPL20|MXRA8|NADK|NOC2L|PANK4|PEX10|PLCH2|PLEKHN1|PRDM16|PRKCZ|PRXL2B|PUSL1|RER1|RNF223|SAMD11|SCNN1D|SDF4|SKI|SLC35E2A|SLC35E2B|SSU72|TAS1R3|TMEM240|TMEM52|TMEM88B|TNFRSF…		See cases	VCV000253626	1	874455 - 3177921			253626	248074			copy number loss		Pathogenic	Jan 20, 2016	criteria provided, single submitter
GRCh37/hg19 1p36.33-36.32(chr1:874455-2577794)x1	ACAP3|AGRN|ANKRD65|ATAD3A|ATAD3B|ATAD3C|AURKAIP1|B3GALT6|C1QTNF12|C1orf159|CALML6|CCNL2|CDK11A|CDK11B|CFAP74|CPTP|DVL1|FAAP20|FNDC10|GABRD|GNB1|HES4|HES5|INTS11|ISG15|KLHL17|MIB2|MIR200A|MIR200B|MIR429|MMEL1|MMP23B|MORN1|MRPL20|MXRA8|NADK|NOC2L|PANK4|PEX10|PLCH2|PLEKHN1|PRKCZ|PRXL2B|PUSL1|RER1|RNF223|SAMD11|SCNN1D|SDF4|SKI|SLC35E2A|SLC35E2B|SSU72|TAS1R3|TMEM240|TMEM52|TMEM88B|TNFRSF14|TNFRSF18|TN…		See cases	VCV000253595	1	874455 - 2577794			253595	248043			copy number loss		Pathogenic	Jan 20, 2016	criteria provided, single submitter
GRCh37/hg19 1p36.33-36.21(chr1:746608-15077159)x1	CCNL2|CDK11A|CDK11B|CENPS|CENPS-CORT|CEP104|CFAP107|CFAP74|CORT|CPTP|CHD5|CLCN6|CLSTN1|ACAP3|AADACL3|AADACL4|ACOT7|ACTRT2|AGRN|AGTRAP|AJAP1|ANGPTL7|ANKRD65|ARHGEF16|ATAD3A|ATAD3B|ATAD3C|AURKAIP1|B3GALT6|C1QTNF12|C1orf127|C1orf159|C1orf167|C1orf174|CA6|CALML6|CAMTA1|CASZ1|CCDC27|CTNNBIP1|DFFA|DFFB|DHRS3|DISP3|DNAJC11|DRAXIN|DVL1|ENO1|ENO1-AS1|ERRFI1|ESPN|EXOSC10|FAAP20|FBXO2|FBXO44|FBXO6|FNDC10|GA…		See cases	VCV000253459	1	746608 - 15077159			253459	247907			copy number loss		Pathogenic	Jan 20, 2016	criteria provided, single submitter
GRCh37/hg19 1p36.33-36.22(chr1:82154-12699337)x1	ACAP3|ACOT7|ACTRT2|AGRN|AGTRAP|AJAP1|ANGPTL7|ANKRD65|ARHGEF16|ATAD3A|ATAD3B|ATAD3C|AURKAIP1|B3GALT6|C1QTNF12|C1orf127|C1orf159|C1orf167|C1orf174|CA6|CALML6|CAMTA1|CENPS-CORT|CASZ1|CCDC27|CCNL2|CDK11A|CDK11B|CENPS|CEP104|CFAP74|CHD5|CLCN6|CLSTN1|CORT|CPTP|CTNNBIP1|DFFA|DFFB|DHRS3|DISP3|DNAJC11|DRAXIN|DVL1|ENO1|ENO1-AS1|ERRFI1|ESPN|EXOSC10|FAAP20|FBXO2|FBXO44|FBXO6|FNDC10|GABRD|GNB1|GPR153|GPR157|H…		See cases	VCV000252976	1	82154 - 12699337			252976	247379			copy number loss		Pathogenic	Jun 6, 2016	criteria provided, single submitter
Single allele	TMEM240|TMEM88B|TNFRSF4|TTLL10|TTLL10-AS1|UBE2J2|VWA1|TNFRSF18|NADK|NOC2L|PERM1|PLEKHN1|PUSL1|RNF223|SAMD11|SCNN1D|SDF4|SLC35E2A|SLC35E2B|SNORD167|SSU72|TAS1R3|ACAP3|AGRN|ANKRD65|ANKRD65-AS1|ATAD3A|ATAD3B|ATAD3C|AURKAIP1|B3GALT6|C1QTNF12|C1orf159|CCNL2|CDK11A|CDK11B|CPTP|DVL1|FAM41C|FAM87B|FNDC10|GNB1|HES4|INTS11|ISG15|KLHL17|LINC00115|LINC01128|LINC01342|LINC01770|LINC01786|LINC02593|LOC10028817…		Chromosome 1p36 deletion syndrome	VCV001684638			1	817861 - 1836133	1684638	1676666			Deletion		Pathogenic	Mar 19, 2021	criteria provided, single submitter
NM_002074.5(GNB1):c.1011_1013del (p.Lys337_Ile338delinsAsn)	GNB1		Inborn genetic diseases	VCV000521025	1	1718780 - 1718782	1	1787341 - 1787343	521025	511192	rs1553191393	NC_000001.11:1787340:ATC:	Deletion	inframe_indel	Pathogenic	Apr 25, 2016	criteria provided, single submitter
NM_002074.5(GNB1):c.987_988del (p.Gly330fs)	GNB1	G330fs, G230fs	not provided	VCV000870135	1	1718805 - 1718806	1	1787366 - 1787367	870135	858307	rs1646420115	NC_000001.11:1787365:CT:	Deletion	frameshift variant	Uncertain significance	Mar 9, 2020	criteria provided, single submitter
NM_002074.5(GNB1):c.915_916del (p.Gly306fs)	GNB1	G206fs, G306fs	Intellectual disability, autosomal dominant 42	VCV001315578	1	1720492 - 1720493	1	1789053 - 1789054	1315578	1305838	rs2100479399	NC_000001.11:1789052:CT:	Deletion	frameshift variant	Pathogenic	Nov 2, 2021	no assertion criteria provided
NM_002074.5(GNB1):c.631_632del (p.Trp211fs)	GNB1	W211fs, W111fs	not provided	VCV002089091	1	1721901 - 1721902	1	1790462 - 1790463	2089091	2148191		NC_000001.11:1790461:CA:	Deletion	frameshift variant	Uncertain significance	Jan 22, 2022	criteria provided, single submitter
NM_002074.5(GNB1):c.299_327del (p.Val100fs)	GNB1	V100fs, M1fs	not provided	VCV002742218	1	1735961 - 1735989	1	1804522 - 1804550	2742218	2902989		NC_000001.11:1804521:CCCAGAAGGGGCATATGCACAGGTCATGACCCAG:CCCAG	Deletion	frameshift variant|initiator_codon_variant	Pathogenic	Jul 12, 2023	criteria provided, single submitter
NM_002074.5(GNB1):c.272_275del (p.His91fs)	GNB1	H91fs	Intellectual disability, autosomal dominant 42	VCV001315577	1	1736013 - 1736016	1	1804574 - 1804577	1315577	1305837	rs2100699881	NC_000001.11:1804573:GCGTG:G	Deletion	5 prime UTR variant|frameshift variant	Pathogenic	Nov 2, 2021	no assertion criteria provided
NC_000001.10:g.(?_1718770)_(2343941_?)del	CALML6|CFAP74|FAAP20|GABRD|GNB1|MORN1|PEX10|PRKCZ|RER1|SKI|TMEM52		not provided	VCV003247933	1	1718770 - 2343941			3247933	3402888			Deletion		Pathogenic	Dec 30, 2023	criteria provided, single submitter
NC_000001.10:g.(?_1146935)_(3768971_?)del	ACAP3|ACTRT2|ANKRD65|ARHGEF16|ATAD3A|ATAD3B|ATAD3C|AURKAIP1|B3GALT6|C1QTNF12|CALML6|CCDC27|CCNL2|CDK11A|CDK11B|CEP104|CFAP74|CPTP|DVL1|FAAP20|FNDC10|GABRD|GNB1|HES5|INTS11|LRRC47|MEGF6|MIB2|MIR551A|MMEL1|MMP23B|MORN1|MRPL20|MXRA8|NADK|PANK4|PEX10|PLCH2|PRDM16|PRKCZ|PRXL2B|PUSL1|RER1|SCNN1D|SDF4|SKI|SLC35E2A|SLC35E2B|SMIM1|SSU72|TAS1R3|TMEM240|TMEM52|TMEM88B|TNFRSF14|TNFRSF4|TP73|TPRG1L|TTC34|UBE2…		Shprintzen-Goldberg syndrome	VCV003247720	1	1146935 - 3768971			3247720	3404230			Deletion		Uncertain significance	Dec 7, 2023	criteria provided, single submitter
NC_000001.10:g.(?_1735838)_(1736040_?)del	GNB1		not provided	VCV002424352	1	1735838 - 1736040			2424352	1939512			Deletion		Uncertain significance	Jul 10, 2023	criteria provided, single submitter
NC_000001.10:g.(?_989123)_(3160711_?)del	MIR429|MMEL1|MMP23B|NADK|PLCH2|MORN1|MRPL20|PRDM16|PRKCZ|PANK4|PEX10|MXRA8|ACAP3|ACTRT2|AGRN|ANKRD65|ATAD3A|ATAD3B|ATAD3C|AURKAIP1|B3GALT6|C1QTNF12|C1orf159|CALML6|CCNL2|CDK11A|CDK11B|CFAP74|CPTP|DVL1|FAAP20|FNDC10|GABRD|GNB1|HES5|INTS11|MIB2|MIR200A|MIR200B|PRXL2B|PUSL1|RER1|RNF223|SCNN1D|SDF4|SKI|SLC35E2A|SLC35E2B|SSU72|TAS1R3|TMEM240|TMEM52|TMEM88B|TNFRSF14|TNFRSF18|TNFRSF4|TTC34|TTLL10|UBE2J2…		Left ventricular noncompaction 8	VCV001449306	1	989123 - 3160711			1449306	1416362			Deletion		Uncertain significance	Mar 8, 2022	criteria provided, single submitter
NC_000001.10:g.(?_955553)_(3350375_?)del	AGRN|ANKRD65|ACAP3|ATAD3C|AURKAIP1|ACTRT2|B3GALT6|C1QTNF12|ATAD3A|ATAD3B|C1orf159|CALML6|CCNL2|CDK11A|CDK11B|CFAP74|CPTP|DVL1|FAAP20|FNDC10|GABRD|GNB1|HES5|INTS11|MIB2|MIR200A|MIR200B|MIR429|MMEL1|MMP23B|MORN1|MRPL20|MXRA8|NADK|PANK4|PEX10|PLCH2|PRDM16|PRKCZ|PRXL2B|PUSL1|RER1|RNF223|SCNN1D|SDF4|SKI|SLC35E2A|SLC35E2B|SSU72|TAS1R3|TMEM240|TMEM52|TMEM88B|TNFRSF14|TNFRSF18|TNFRSF4|TTC34|TTLL10|UBE2J2…		Left ventricular noncompaction 8	VCV001443760	1	955553 - 3350375			1443760	1487760			Deletion		Uncertain significance	Apr 4, 2023	criteria provided, single submitter
NC_000001.10:g.(?_861322)_(3768971_?)del	ATAD3A|ACAP3|ACTRT2|AGRN|ANKRD65|ARHGEF16|ATAD3B|ATAD3C|AURKAIP1|B3GALT6|C1QTNF12|C1orf159|CALML6|CCDC27|CCNL2|CDK11A|CDK11B|CEP104|CFAP74|CPTP|DVL1|FAAP20|FNDC10|GABRD|GNB1|HES4|HES5|INTS11|ISG15|KLHL17|LRRC47|MEGF6|MIB2|MIR200A|MIR200B|MIR429|MIR551A|MMEL1|MMP23B|MORN1|MRPL20|MXRA8|NADK|NOC2L|PANK4|PEX10|PLCH2|PLEKHN1|PRDM16|PRKCZ|PRXL2B|PUSL1|RER1|RNF223|SAMD11|SCNN1D|SDF4|SKI|SLC35E2A|SLC35E2…		Peroxisome biogenesis disorder, complementation group 7	VCV001412663	1	861322 - 3768971			1412663	1356261			Deletion		Pathogenic	Oct 17, 2022	criteria provided, single submitter
Single allele	ACTRT2|ARHGEF16|C1orf174|CALML6|CCDC27|CEP104|CFAP74|DFFB|FAAP20|GABRD|GNB1|HES5|LRRC47|MEGF6|MIR551A|MMEL1|MORN1|NADK|PANK4|PEX10|PLCH2|PRDM16|PRKCZ|PRXL2B|RER1|SKI|SLC35E2A|SMIM1|TMEM52|TNFRSF14|TP73|TPRG1L|TTC34|WRAP73		Chromosome 1p36 deletion syndrome	VCV000974581	1	1670720 - 3816863			974581	962878			Deletion		Pathogenic	May 9, 2018	criteria provided, single submitter
NC_000001.10:g.(?_955543)_(3350385_?)del	TMEM88B|TTLL10|UBE2J2|TNFRSF4|TNFRSF14|TNFRSF18|TTC34|VWA1|ACAP3|ACTRT2|AGRN|ANKRD65|ATAD3A|ATAD3B|ATAD3C|AURKAIP1|B3GALT6|C1QTNF12|C1orf159|CALML6|CCNL2|CDK11A|CDK11B|CFAP74|CPTP|DVL1|FAAP20|FNDC10|GABRD|GNB1|HES5|INTS11|MIB2|MIR200A|MIR200B|MIR429|MMEL1|MMP23B|MORN1|MRPL20|MXRA8|NADK|PANK4|PEX10|PLCH2|PRDM16|PRKCZ|PRXL2B|PUSL1|RER1|RNF223|SCNN1D|SDF4|SKI|SLC35E2A|SLC35E2B|SSU72|TAS1R3|TMEM240|T…		Left ventricular noncompaction 8	VCV000833146	1	955543 - 3350385			833146	818823			Deletion		Uncertain significance	May 22, 2019	criteria provided, single submitter
NC_000001.10:g.(?_955543)_(2238214_?)del	MMP23B|MRPL20|TMEM52|TNFRSF4|TTLL10|UBE2J2|NADK|PRKCZ|PUSL1|MXRA8|TMEM88B|TNFRSF18|RNF223|SCNN1D|SDF4|ACAP3|AGRN|ANKRD65|ATAD3A|ATAD3B|ATAD3C|AURKAIP1|B3GALT6|C1QTNF12|C1orf159|CALML6|CCNL2|CDK11A|CDK11B|CFAP74|CPTP|DVL1|FAAP20|FNDC10|GABRD|GNB1|INTS11|MIB2|MIR200A|MIR200B|MIR429|SKI|SLC35E2A|SLC35E2B|SSU72|TAS1R3|TMEM240|VWA1		Congenital myasthenic syndrome 8	VCV000832780	1	955543 - 2238214			832780	818822			Deletion		Pathogenic	Dec 2, 2019	criteria provided, single submitter
NC_000001.10:g.(?_955543)_(2957600_?)del	TMEM88B|TNFRSF14|TNFRSF18|TNFRSF4|TTLL10|UBE2J2|VWA1|TTC34|ACAP3|ACTRT2|AGRN|ANKRD65|ATAD3A|ATAD3B|ATAD3C|AURKAIP1|B3GALT6|C1QTNF12|C1orf159|CALML6|CCNL2|CDK11A|CDK11B|CFAP74|CPTP|DVL1|FAAP20|FNDC10|GABRD|GNB1|HES5|INTS11|MIB2|MIR200A|MIR200B|MIR429|MMEL1|MMP23B|MORN1|MRPL20|MXRA8|NADK|PANK4|PEX10|PLCH2|PRKCZ|PRXL2B|PUSL1|RER1|RNF223|SCNN1D|SDF4|SKI|SLC35E2A|SLC35E2B|SSU72|TAS1R3|TMEM240|TMEM52		Shprintzen-Goldberg syndrome	VCV000659614	1	955543 - 2957600			659614	650517			Deletion		Uncertain significance	Sep 20, 2018	criteria provided, single submitter
Single allele	ACAP3|ACOT7|ACTRT2|AGRN|AJAP1|ANKRD65|ARHGEF16|ATAD3A|ATAD3B|ATAD3C|AURKAIP1|B3GALT6|C1QTNF12|C1orf159|C1orf174|CA6|CALML6|CAMTA1|CCDC27|CCNL2|CDK11A|CDK11B|CEP104|CFAP74|CHD5|CPTP|DFFB|DNAJC11|DVL1|ENO1|ENO1-AS1|ERRFI1|ESPN|FAAP20|FNDC10|GABRD|GNB1|GPR153|GPR157|H6PD|HES2|HES3|HES4|HES5|ICMT|INTS11|ISG15|KCNAB2|KLHL17|KLHL21|LRRC47|MEGF6|MIB2|MIR200A|MIR200B|MIR34A|MIR429|MIR551A|MMEL1|MMP23B|MO…		Neurodevelopmental disorder	VCV000635907	1	554375 - 9779842			635907	623720			Deletion		Pathogenic	Apr 9, 2019	criteria provided, single submitter
NC_000001.10:g.(?_1249188)_(1961741_?)del	ANKRD65|ATAD3A|ATAD3B|ATAD3C|AURKAIP1|CALML6|CCNL2|CDK11A|CDK11B|CFAP74|CPTP|DVL1|FNDC10|GABRD|GNB1|INTS11|MIB2|MMP23B|MRPL20|MXRA8|NADK|SLC35E2A|SLC35E2B|SSU72|TAS1R3|TMEM240|TMEM52|TMEM88B|VWA1		Idiopathic generalized epilepsy	VCV000583548	1	1249188 - 1961741			583548	556491			Deletion		Uncertain significance	Nov 18, 2019	criteria provided, single submitter
NM_002074.5(GNB1):c.833_835del (p.Phe278del)	GNB1	F178del, F278del	Intellectual disability, autosomal dominant 42	VCV003359132					3359132	3518348			Deletion	inframe_deletion	Uncertain significance	Apr 1, 2021	criteria provided, single submitter
NM_002074.5(GNB1):c.700-15dup	GNB1		not provided	VCV002018727	1	1720722 - 1720723	1	1789283 - 1789284	2018727	2068963		NC_000001.11:1789283:C:CC	Duplication	intron variant	Likely benign	Jul 21, 2022	criteria provided, single submitter
NM_002074.5(GNB1):c.497+168dup	GNB1		not provided	VCV001278310	1	1724503 - 1724504	1	1793064 - 1793065	1278310	1268187	rs33952351	NC_000001.11:1793064:AAAAAAAAAAAAA:AAAAAAAAAAAAAA	Duplication	intron variant	Benign	May 12, 2021	criteria provided, single submitter
NM_002074.5(GNB1):c.430+3_430+6dup	GNB1		not provided	VCV002041711	1	1735851 - 1735852	1	1804412 - 1804413	2041711	2091872		NC_000001.11:1804412:AGGTA:AGGTAGGTA	Duplication	splice donor variant	Likely benign	Aug 10, 2022	criteria provided, single submitter
NM_002074.5(GNB1):c.268-7dup	GNB1		not provided	VCV000739491	1	1736026 - 1736027	1	1804587 - 1804588	739491	758863	rs773542848	NC_000001.11:1804587:A:AA	Duplication	intron variant	Likely benign	Sep 25, 2023	criteria provided, single submitter
NM_002074.5(GNB1):c.267+1dup	GNB1		not provided	VCV002576056	1	1737912 - 1737913	1	1806473 - 1806474	2576056	2740953		NC_000001.11:1806473:CC:CCC	Duplication	splice donor variant	Pathogenic	Jul 19, 2021	criteria provided, single submitter
NM_002074.5(GNB1):c.204-15dup	GNB1		not provided	VCV001914013	1	1737991 - 1737992	1	1806552 - 1806553	1914013	1970344		NC_000001.11:1806552:AAAA:AAAAA	Duplication	intron variant	Benign	Sep 24, 2022	criteria provided, single submitter
NM_002074.5(GNB1):c.203+18dup	GNB1		not provided	VCV002986106	1	1747176 - 1747177	1	1815737 - 1815738	2986106	3146422		NC_000001.11:1815737:G:GG	Duplication	intron variant	Likely benign	Mar 28, 2023	criteria provided, single submitter
NM_002074.5(GNB1):c.57+11dup	GNB1		not provided	VCV002727069	1	1756824 - 1756825	1	1825385 - 1825386	2727069	2882388		NC_000001.11:1825385:C:CC	Duplication	intron variant	Uncertain significance	Jun 24, 2023	criteria provided, single submitter
NC_000001.10:g.(?_1718770)_(1749334_?)dup	GNB1		not provided	VCV003247937	1	1718770 - 1749334			3247937	3402891			Duplication		Uncertain significance	Jun 5, 2023	criteria provided, single submitter
NC_000001.10:g.(?_1749256)_(1961721_?)dup	CALML6|CFAP74|GABRD|GNB1|TMEM52		not provided	VCV003247936	1	1749256 - 1961721			3247936	3402890			Duplication		Uncertain significance	Jun 28, 2023	criteria provided, single submitter
NC_000001.10:g.(?_1718770)_(1961721_?)dup	CALML6|CFAP74|GABRD|GNB1|TMEM52		not provided	VCV003247935	1	1718770 - 1961721			3247935	1456849			Duplication		Uncertain significance	Jan 25, 2024	criteria provided, single submitter
NC_000001.10:g.(?_1718770)_(1756892_?)dup	GNB1		not provided	VCV003247934	1	1718770 - 1756892			3247934	3402889			Duplication		Uncertain significance	Oct 13, 2023	criteria provided, single submitter
NC_000001.10:g.(?_1470739)_(3768971_?)dup	ACTRT2|ARHGEF16|CALML6|CCDC27|CDK11A|CDK11B|CEP104|CFAP74|FAAP20|FNDC10|GABRD|GNB1|HES5|LRRC47|MEGF6|MIB2|MIR551A|MMEL1|MMP23B|MORN1|NADK|PANK4|PEX10|PLCH2|PRDM16|PRKCZ|PRXL2B|RER1|SKI|SLC35E2A|SLC35E2B|SMIM1|SSU72|TMEM240|TMEM52|TNFRSF14|TP73|TPRG1L|TTC34|WRAP73		not provided	VCV003247906	1	1470739 - 3768971			3247906	3402861			Duplication		Uncertain significance	Oct 3, 2023	criteria provided, single submitter
NC_000001.10:g.(?_1716723)_(1749315_1756835)dup	GNB1		not specified	VCV002627127	1	1716723 - 1756835			2627127	2794647			Duplication		Uncertain significance	Sep 6, 2023	criteria provided, single submitter
NC_000001.10:g.(?_1550840)_(1724770_?)dup	CDK11A|CDK11B|GNB1|MIB2|MMP23B|NADK|SLC35E2A|SLC35E2B		not provided	VCV001511801	1	1550840 - 1724770			1511801	1459281			Duplication		Uncertain significance	Feb 17, 2021	criteria provided, single submitter
NC_000001.10:g.(?_1724664)_(2338414_?)dup	CALML6|CFAP74|FAAP20|GABRD|GNB1|MORN1|PEX10|PRKCZ|RER1|SKI|TMEM52		Peroxisome biogenesis disorder, complementation group 7	VCV001409942	1	1724664 - 2338414			1409942	1435198			Duplication		Uncertain significance	Aug 9, 2022	criteria provided, single submitter
NC_000001.10:g.(?_1718770)_(1720728_?)dup	GNB1		not provided	VCV001374032	1	1718770 - 1720728			1374032	1456850			Duplication		Uncertain significance	Oct 21, 2021	criteria provided, single submitter

## Sheet: SNPs
Name	Gene(s)	Protein change	Condition(s)	Accession	GRCh37Chromosome	GRCh37Location	GRCh38Chromosome	GRCh38Location	VariationID	AlleleID(s)	dbSNP ID	Canonical SPDI	Variant type	Molecular consequence	Germline classification	Germline date last evaluated	Germline review status	Somatic clinical impact	Somatic clinical impact date last evaluated	Somatic clinical impact review status	Oncogenicity classification	Oncogenicity date last evaluated	Oncogenicity review status
NM_002074.5(GNB1):c.*1316G>C	GNB1		Intellectual disability, autosomal dominant 42	VCV001696697	1	1717186	1	1785747	1696697	1689099	rs1646396861	NC_000001.11:1785746:C:G	single nucleotide variant	3 prime UTR variant	Uncertain significance	Aug 6, 2021	criteria provided, single submitter
NM_002074.5(GNB1):c.-8A>G	GNB1		GNB1-related disorder	VCV003044252	1	1756900	1	1825461	3044252	3208424		NC_000001.11:1825460:T:C	single nucleotide variant	5 prime UTR variant	Likely benign	Sep 22, 2022	no assertion criteria provided
NM_002074.5(GNB1):c.-16G>A	GNB1		not specified	VCV002682394	1	1756908	1	1825469	2682394	2843425		NC_000001.11:1825468:C:T	single nucleotide variant	5 prime UTR variant	Uncertain significance	Nov 8, 2023	criteria provided, single submitter
NM_002074.5(GNB1):c.296G>T (p.Trp99Leu)	GNB1	W99L	Intellectual disability, autosomal dominant 42	VCV003237184	1	1735992	1	1804553	3237184	3396309		NC_000001.11:1804552:C:A	single nucleotide variant	5 prime UTR variant|missense variant	Likely pathogenic		criteria provided, single submitter
NM_002074.5(GNB1):c.295T>C (p.Trp99Arg)	GNB1	W99R	not provided	VCV003369475	1	1735993	1	1804554	3369475	3528666		NC_000001.11:1804553:A:G	single nucleotide variant	5 prime UTR variant|missense variant	Uncertain significance	Feb 21, 2024	criteria provided, single submitter
NM_002074.5(GNB1):c.293C>T (p.Ser98Phe)	GNB1	S98F	not provided	VCV001800950	1	1735995	1	1804556	1800950	1858238		NC_000001.11:1804555:G:A	single nucleotide variant	5 prime UTR variant|missense variant	Uncertain significance	May 27, 2022	criteria provided, single submitter
NM_002074.5(GNB1):c.287G>T (p.Arg96Leu)	GNB1	R96L	Intellectual disability, autosomal dominant 42	VCV000995962	1	1736001	1	1804562	995962	983664	rs1646670990	NC_000001.11:1804561:C:A	single nucleotide variant	5 prime UTR variant|missense variant	Pathogenic	Nov 3, 2021	no assertion criteria provided
NM_002074.5(GNB1):c.286C>T (p.Arg96Cys)	GNB1	R96C	not provided	VCV001334942	1	1736002	1	1804563	1334942	1325916	rs2100699787	NC_000001.11:1804562:G:A	single nucleotide variant	5 prime UTR variant|missense variant	Likely pathogenic	Nov 1, 2021	criteria provided, single submitter
NM_002074.5(GNB1):c.284T>C (p.Leu95Pro)	GNB1	L95P	not provided|Microcephaly|Hypotonia	VCV000224716	1	1736004	1	1804565	224716	226497	rs869312824	NC_000001.11:1804564:A:G	single nucleotide variant	5 prime UTR variant|missense variant	Pathogenic/Likely pathogenic	Jul 11, 2022	criteria provided, multiple submitters, no conflicts
NM_002074.5(GNB1):c.281C>G (p.Pro94Arg)	GNB1	P94R	not provided|Intellectual disability, autosomal dominant 42	VCV002000177	1	1736007	1	1804568	2000177	2050811		NC_000001.11:1804567:G:C	single nucleotide variant	5 prime UTR variant|missense variant	Conflicting classifications of pathogenicity	Oct 31, 2022	criteria provided, conflicting classifications
NM_002074.5(GNB1):c.280C>T (p.Pro94Ser)	GNB1	P94S	Intellectual disability, autosomal dominant 42|not specified	VCV000976435	1	1736008	1	1804569	976435	964137	rs1646671069	NC_000001.11:1804568:G:A	single nucleotide variant	5 prime UTR variant|missense variant	Uncertain significance	Jan 2, 2024	criteria provided, multiple submitters, no conflicts
NM_002074.5(GNB1):c.274G>A (p.Ala92Thr)	GNB1	A92T	Intellectual disability|Intellectual disability, autosomal dominant 42|not provided	VCV000633546	1	1736014	1	1804575	633546	621936	rs1557889974	NC_000001.11:1804574:C:T	single nucleotide variant	5 prime UTR variant|missense variant	Pathogenic/Likely pathogenic	Aug 17, 2023	criteria provided, multiple submitters, no conflicts
NM_002074.5(GNB1):c.266A>T (p.Lys89Met)	GNB1	K89M	not provided	VCV001360749	1	1737915	1	1806476	1360749	1360315	rs1064795844	NC_000001.11:1806475:T:A	single nucleotide variant	5 prime UTR variant|missense variant	Uncertain significance	Oct 5, 2022	criteria provided, single submitter
NM_002074.5(GNB1):c.266A>G (p.Lys89Arg)	GNB1	K89R	not provided	VCV000422536	1	1737915	1	1806476	422536	404989	rs1064795844	NC_000001.11:1806475:T:C	single nucleotide variant	5 prime UTR variant|missense variant	Likely pathogenic	Oct 24, 2016	criteria provided, single submitter
NM_002074.5(GNB1):c.262A>G (p.Asn88Asp)	GNB1	N88D	not provided	VCV001710408	1	1737919	1	1806480	1710408	1708818		NC_000001.11:1806479:T:C	single nucleotide variant	5 prime UTR variant|missense variant	Uncertain significance	Jul 13, 2022	criteria provided, single submitter
NM_002074.5(GNB1):c.239T>G (p.Ile80Ser)	GNB1	I80S	not provided|Intellectual disability, autosomal dominant 42	VCV000391609	1	1737942	1	1806503	391609	364646	rs752746786	NC_000001.11:1806502:A:C	single nucleotide variant	5 prime UTR variant|missense variant	Pathogenic/Likely pathogenic	Jun 13, 2023	criteria provided, multiple submitters, no conflicts
NM_002074.5(GNB1):c.239T>A (p.Ile80Asn)	GNB1	I80N	Acute lymphoid leukemia|not provided|Intellectual disability, autosomal dominant 42	VCV000224715	1	1737942	1	1806503	224715	226498	rs752746786	NC_000001.11:1806502:A:T	single nucleotide variant	5 prime UTR variant|missense variant	Pathogenic	Nov 1, 2024	criteria provided, multiple submitters, no conflicts
NM_002074.5(GNB1):c.239T>C (p.Ile80Thr)	GNB1	I80T	Global developmental delay|Intellectual disability|Cerebral palsy|Neurodevelopmental delay|Intellectual disability, autosomal dominant 42|Neurodevelopmental disorder|Inborn genetic diseases|not provided	VCV000208722	1	1737942	1	1806503	208722	205216	rs752746786	NC_000001.11:1806502:A:G	single nucleotide variant	5 prime UTR variant|missense variant	Pathogenic/Likely pathogenic	Oct 9, 2024	criteria provided, multiple submitters, no conflicts
NM_002074.5(GNB1):c.233A>G (p.Lys78Arg)	GNB1	K78R	Inborn genetic diseases|Global developmental delay-neuro-ophthalmological abnormalities-seizures-intellectual disability syndrome|not provided|Intellectual disability, autosomal dominant 42	VCV000224714	1	1737948	1	1806509	224714	226499	rs869312823	NC_000001.11:1806508:T:C	single nucleotide variant	5 prime UTR variant|missense variant	Pathogenic/Likely pathogenic	Mar 28, 2024	criteria provided, multiple submitters, no conflicts
NM_002074.5(GNB1):c.230G>T (p.Gly77Val)	GNB1	G77V	not provided	VCV001315582	1	1737951	1	1806512	1315582	1305842	rs1135401746	NC_000001.11:1806511:C:A	single nucleotide variant	5 prime UTR variant|missense variant	Pathogenic	Aug 27, 2023	criteria provided, single submitter
NM_002074.5(GNB1):c.230G>A (p.Gly77Asp)	GNB1	G77D	Intellectual disability|Intellectual disability, autosomal dominant 42|not provided|Inborn genetic diseases	VCV000985590	1	1737951	1	1806512	985590	973154	rs1135401746	NC_000001.11:1806511:C:T	single nucleotide variant	5 prime UTR variant|missense variant	Pathogenic/Likely pathogenic	Jun 29, 2023	criteria provided, multiple submitters, no conflicts
NM_002074.5(GNB1):c.230G>C (p.Gly77Ala)	GNB1	G77A	not provided|Inborn genetic diseases|Intellectual disability, autosomal dominant 42	VCV000431082	1	1737951	1	1806512	431082	424605	rs1135401746	NC_000001.11:1806511:C:G	single nucleotide variant	5 prime UTR variant|missense variant	Conflicting classifications of pathogenicity	Feb 6, 2024	criteria provided, conflicting classifications
NM_002074.5(GNB1):c.229G>T (p.Gly77Cys)	GNB1	G77C	Neurodevelopmental delay|Intellectual disability, autosomal dominant 42	VCV001700090	1	1737952	1	1806513	1700090	1692486	rs758432471	NC_000001.11:1806512:C:A	single nucleotide variant	5 prime UTR variant|missense variant	Pathogenic	Mar 25, 2024	criteria provided, multiple submitters, no conflicts
NM_002074.5(GNB1):c.229G>A (p.Gly77Ser)	GNB1	G77S	Inborn genetic diseases|not provided|Intellectual disability, autosomal dominant 42	VCV000224713	1	1737952	1	1806513	224713	226500	rs758432471	NC_000001.11:1806512:C:T	single nucleotide variant	5 prime UTR variant|missense variant	Pathogenic/Likely pathogenic	May 23, 2023	criteria provided, multiple submitters, no conflicts
NM_002074.5(GNB1):c.228T>A (p.Asp76Glu)	GNB1	D76E	Intellectual disability, autosomal dominant 42	VCV001699320	1	1737953	1	1806514	1699320	1691694	rs869312822	NC_000001.11:1806513:A:T	single nucleotide variant	5 prime UTR variant|missense variant	Pathogenic	Jun 24, 2022	criteria provided, single submitter
NM_002074.5(GNB1):c.228T>G (p.Asp76Glu)	GNB1	D76E	Neurodevelopmental Disability|Seizure|Hypotonia|Global developmental delay|Limb hypertonia|Strabismus|Focal impaired awareness seizure|Seizure|Failure to thrive	VCV000224712	1	1737953	1	1806514	224712	226501	rs869312822	NC_000001.11:1806513:A:C	single nucleotide variant	5 prime UTR variant|missense variant	Pathogenic/Likely pathogenic	May 5, 2016	no assertion criteria provided
NM_002074.5(GNB1):c.227A>G (p.Asp76Gly)	GNB1	D76G	not provided	VCV000224711	1	1737954	1	1806515	224711	226502	rs869312821	NC_000001.11:1806514:T:C	single nucleotide variant	5 prime UTR variant|missense variant	Pathogenic	Nov 1, 2022	criteria provided, multiple submitters, no conflicts
NM_002074.5(GNB1):c.226G>A (p.Asp76Asn)	GNB1	D76N	not provided|Intellectual disability, autosomal dominant 42	VCV000976696	1	1737955	1	1806516	976696	964797	rs1646697327	NC_000001.11:1806515:C:T	single nucleotide variant	5 prime UTR variant|missense variant	Pathogenic/Likely pathogenic	Oct 19, 2022	criteria provided, multiple submitters, no conflicts
NM_002074.5(GNB1):c.217G>A (p.Ala73Thr)	GNB1	A73T	Global developmental delay-neuro-ophthalmological abnormalities-seizures-intellectual disability syndrome	VCV001708250	1	1737964	1	1806525	1708250	1706549		NC_000001.11:1806524:C:T	single nucleotide variant	5 prime UTR variant|missense variant	Likely pathogenic	Oct 4, 2022	criteria provided, single submitter
NM_002074.5(GNB1):c.217G>T (p.Ala73Ser)	GNB1	A73S	not provided	VCV001518601	1	1737964	1	1806525	1518601	1508994	rs2100726769	NC_000001.11:1806524:C:A	single nucleotide variant	5 prime UTR variant|missense variant	Likely pathogenic	Oct 13, 2022	criteria provided, single submitter
NM_002074.5(GNB1):c.55C>G (p.Arg19Gly)	GNB1	R19G	not provided	VCV002812227	1	1756838	1	1825399	2812227	2965620		NC_000001.11:1825398:G:C	single nucleotide variant	5 prime UTR variant|missense variant	Uncertain significance	Aug 18, 2023	criteria provided, single submitter
NM_002074.5(GNB1):c.34G>A (p.Glu12Lys)	GNB1	E12K	not provided|Intellectual disability, autosomal dominant 42	VCV000638348	1	1756859	1	1825420	638348	626101	rs1570674859	NC_000001.11:1825419:C:T	single nucleotide variant	5 prime UTR variant|missense variant	Conflicting classifications of pathogenicity	Oct 3, 2023	criteria provided, conflicting classifications
NM_002074.5(GNB1):c.23G>A (p.Arg8Gln)	GNB1	R8Q	not provided	VCV003336890	1	1756870	1	1825431	3336890	3495552		NC_000001.11:1825430:C:T	single nucleotide variant	5 prime UTR variant|missense variant	Uncertain significance	May 27, 2022	criteria provided, single submitter
NM_002074.5(GNB1):c.55C>T (p.Arg19Ter)	GNB1	R19*	not provided	VCV001433729	1	1756838	1	1825399	1433729	1419402	rs2100991976	NC_000001.11:1825398:G:A	single nucleotide variant	5 prime UTR variant|nonsense	Uncertain significance	Jan 4, 2021	criteria provided, single submitter
NM_002074.5(GNB1):c.300C>A (p.Val100=)	GNB1		not provided	VCV002973912	1	1735988	1	1804549	2973912	3140331		NC_000001.11:1804548:G:T	single nucleotide variant	5 prime UTR variant|synonymous variant	Benign	Jul 30, 2023	criteria provided, single submitter
NM_002074.5(GNB1):c.294C>T (p.Ser98=)	GNB1		not provided	VCV002878613	1	1735994	1	1804555	2878613	3033414		NC_000001.11:1804554:G:A	single nucleotide variant	5 prime UTR variant|synonymous variant	Likely benign	Aug 16, 2023	criteria provided, single submitter
NM_002074.5(GNB1):c.291C>T (p.Ser97=)	GNB1		not provided	VCV001950127	1	1735997	1	1804558	1950127	1999955		NC_000001.11:1804557:G:A	single nucleotide variant	5 prime UTR variant|synonymous variant	Likely benign	Nov 27, 2023	criteria provided, single submitter
NM_002074.5(GNB1):c.288C>T (p.Arg96=)	GNB1		not provided	VCV001593919	1	1736000	1	1804561	1593919	1655338	rs770828889	NC_000001.11:1804560:G:A	single nucleotide variant	5 prime UTR variant|synonymous variant	Likely benign	Jul 30, 2022	criteria provided, single submitter
NM_002074.5(GNB1):c.273C>T (p.His91=)	GNB1		not provided	VCV001581382	1	1736015	1	1804576	1581382	1534482	rs776262309	NC_000001.11:1804575:G:A	single nucleotide variant	5 prime UTR variant|synonymous variant	Likely benign	Aug 17, 2023	criteria provided, single submitter
NM_002074.5(GNB1):c.264C>T (p.Asn88=)	GNB1		not provided	VCV002180565	1	1737917	1	1806478	2180565	1909382		NC_000001.11:1806477:G:A	single nucleotide variant	5 prime UTR variant|synonymous variant	Likely benign	Jun 30, 2022	criteria provided, single submitter
NM_002074.5(GNB1):c.261C>T (p.Thr87=)	GNB1		not provided	VCV001939460	1	1737920	1	1806481	1939460	2000917		NC_000001.11:1806480:G:A	single nucleotide variant	5 prime UTR variant|synonymous variant	Likely benign	Jul 20, 2023	criteria provided, single submitter
NM_002074.5(GNB1):c.258C>T (p.Thr86=)	GNB1		not provided	VCV002872993	1	1737923	1	1806484	2872993	3034867		NC_000001.11:1806483:G:A	single nucleotide variant	5 prime UTR variant|synonymous variant	Likely benign	Jun 18, 2023	criteria provided, single submitter
NM_002074.5(GNB1):c.243C>A (p.Ile81=)	GNB1		not provided	VCV001625458	1	1737938	1	1806499	1625458	1607018	rs372953414	NC_000001.11:1806498:G:T	single nucleotide variant	5 prime UTR variant|synonymous variant	Likely benign	Dec 12, 2023	criteria provided, single submitter
NM_002074.5(GNB1):c.222G>A (p.Ser74=)	GNB1		not provided	VCV001898007	1	1737959	1	1806520	1898007	1959981		NC_000001.11:1806519:C:T	single nucleotide variant	5 prime UTR variant|synonymous variant	Likely benign	Sep 30, 2023	criteria provided, single submitter
NM_002074.5(GNB1):c.213C>T (p.Val71=)	GNB1		not provided	VCV001650276	1	1737968	1	1806529	1650276	1601988	rs2100726799	NC_000001.11:1806528:G:A	single nucleotide variant	5 prime UTR variant|synonymous variant	Likely benign	Nov 24, 2023	criteria provided, single submitter
NM_002074.5(GNB1):c.210C>T (p.Leu70=)	GNB1		not provided	VCV000748050	1	1737971	1	1806532	748050	745869	rs149782013	NC_000001.11:1806531:G:A	single nucleotide variant	5 prime UTR variant|synonymous variant	Likely benign	Dec 11, 2023	criteria provided, single submitter
NM_002074.5(GNB1):c.39A>G (p.Gln13=)	GNB1		not provided	VCV002973383	1	1756854	1	1825415	2973383	3129879		NC_000001.11:1825414:T:C	single nucleotide variant	5 prime UTR variant|synonymous variant	Likely benign	Oct 16, 2023	criteria provided, single submitter
NM_002074.5(GNB1):c.36G>A (p.Glu12=)	GNB1		not provided	VCV002099526	1	1756857	1	1825418	2099526	2150847		NC_000001.11:1825417:C:T	single nucleotide variant	5 prime UTR variant|synonymous variant	Likely benign	Feb 19, 2022	criteria provided, single submitter
NM_002074.5(GNB1):c.33C>T (p.Ala11=)	GNB1		not provided	VCV002177540	1	1756860	1	1825421	2177540	1919232		NC_000001.11:1825420:G:A	single nucleotide variant	5 prime UTR variant|synonymous variant	Likely benign	Dec 13, 2023	criteria provided, single submitter
NM_002074.5(GNB1):c.12T>G (p.Leu4=)	GNB1		not provided	VCV000806038	1	1756881	1	1825442	806038	794506	rs1570674902	NC_000001.11:1825441:A:C	single nucleotide variant	5 prime UTR variant|synonymous variant	Likely benign	Dec 1, 2018	criteria provided, single submitter
NM_002074.5(GNB1):c.93_94del (p.Gln32fs)	GNB1	Q32fs	Intellectual disability, autosomal dominant 42	VCV002572418	1	1749278 - 1749279	1	1817839 - 1817840	2572418	2737364		NC_000001.11:1817838:GAGAGAGAG:GAGAGAG	Microsatellite	frameshift variant|intron variant	Likely pathogenic		criteria provided, single submitter
NM_002074.5(GNB1):c.800ACA[1] (p.Asn268del)	GNB1	N168del, N268del	not provided	VCV001318862	1	1720603 - 1720605	1	1789164 - 1789166	1318862	1307374	rs2100481073	NC_000001.11:1789163:TGTTGT:TGT	Microsatellite	inframe_deletion	Uncertain significance	Jan 24, 2019	criteria provided, single submitter
NM_002074.5(GNB1):c.917-8_917-7delinsTT	GNB1		not provided	VCV001569283	1	1718883 - 1718884	1	1787444 - 1787445	1569283	1603830	rs2100452058	NC_000001.11:1787443:GC:AA	Indel	intron variant	Likely benign	Dec 15, 2022	criteria provided, single submitter
NM_002074.5(GNB1):c.*9+119G>T	GNB1		not provided	VCV001279222	1	1718642	1	1787203	1279222	1266507	rs79370402	NC_000001.11:1787202:C:A	single nucleotide variant	intron variant	Benign	May 12, 2021	criteria provided, multiple submitters, no conflicts
NM_002074.5(GNB1):c.917-5C>T	GNB1		not provided	VCV001940170	1	1718881	1	1787442	1940170	1994309		NC_000001.11:1787441:G:A	single nucleotide variant	intron variant	Likely benign	Feb 20, 2022	criteria provided, single submitter
NM_002074.5(GNB1):c.917-9T>C	GNB1		not provided	VCV001530121	1	1718885	1	1787446	1530121	1665477	rs1159239614	NC_000001.11:1787445:A:G	single nucleotide variant	intron variant	Likely benign	Feb 14, 2022	criteria provided, single submitter
NM_002074.5(GNB1):c.917-14T>C	GNB1		not provided	VCV002990153	1	1718890	1	1787451	2990153	3144058		NC_000001.11:1787450:A:G	single nucleotide variant	intron variant	Likely benign	Apr 12, 2023	criteria provided, single submitter
NM_002074.5(GNB1):c.917-17C>T	GNB1		not provided	VCV001543690	1	1718893	1	1787454	1543690	1557845	rs1323653744	NC_000001.11:1787453:G:A	single nucleotide variant	intron variant	Likely benign	Jan 12, 2022	criteria provided, single submitter
NM_002074.5(GNB1):c.916+19T>C	GNB1		not provided	VCV002793651	1	1720473	1	1789034	2793651	2960821		NC_000001.11:1789033:A:G	single nucleotide variant	intron variant	Likely benign	May 5, 2023	criteria provided, single submitter
NM_002074.5(GNB1):c.916+11A>G	GNB1		not provided	VCV002804145	1	1720481	1	1789042	2804145	2973807		NC_000001.11:1789041:T:C	single nucleotide variant	intron variant	Likely benign	Jan 21, 2024	criteria provided, single submitter
NM_002074.5(GNB1):c.916+11A>T	GNB1		not provided	VCV002004707	1	1720481	1	1789042	2004707	2058773		NC_000001.11:1789041:T:A	single nucleotide variant	intron variant	Likely benign	Jun 11, 2022	criteria provided, single submitter
NM_002074.5(GNB1):c.916+5G>A	GNB1		not provided	VCV001050582	1	1720487	1	1789048	1050582	1036973	rs185462709	NC_000001.11:1789047:C:T	single nucleotide variant	intron variant	Likely benign	Sep 1, 2024	criteria provided, multiple submitters, no conflicts
NM_002074.5(GNB1):c.916+4C>T	GNB1		not provided	VCV001517592	1	1720488	1	1789049	1517592	1420494	rs1646445336	NC_000001.11:1789048:G:A	single nucleotide variant	intron variant	Uncertain significance	Sep 5, 2021	criteria provided, single submitter
NM_002074.5(GNB1):c.916+3A>G	GNB1		not provided|not specified	VCV001970472	1	1720489	1	1789050	1970472	2029185		NC_000001.11:1789049:T:C	single nucleotide variant	intron variant	Uncertain significance	Dec 5, 2023	criteria provided, multiple submitters, no conflicts
NM_002074.5(GNB1):c.700-3C>T	GNB1		not provided	VCV002014104	1	1720711	1	1789272	2014104	2064317		NC_000001.11:1789271:G:A	single nucleotide variant	intron variant	Uncertain significance	Oct 2, 2022	criteria provided, single submitter
NM_002074.5(GNB1):c.700-20G>T	GNB1		not provided	VCV001574275	1	1720728	1	1789289	1574275	1659460	rs762017151	NC_000001.11:1789288:C:A	single nucleotide variant	intron variant	Benign	Dec 6, 2023	criteria provided, single submitter
NM_002074.5(GNB1):c.699+19G>A	GNB1		not provided	VCV001643236	1	1721815	1	1790376	1643236	1587194	rs773385139	NC_000001.11:1790375:C:T	single nucleotide variant	intron variant	Likely benign	Aug 9, 2022	criteria provided, single submitter
NM_002074.5(GNB1):c.498-6C>T	GNB1		not provided	VCV002958529	1	1722041	1	1790602	2958529	3125837		NC_000001.11:1790601:G:A	single nucleotide variant	intron variant	Likely benign	Dec 13, 2023	criteria provided, single submitter
NM_002074.5(GNB1):c.498-7G>A	GNB1		not provided	VCV001942323	1	1722042	1	1790603	1942323	2005056		NC_000001.11:1790602:C:T	single nucleotide variant	intron variant	Likely benign	Aug 30, 2022	criteria provided, single submitter
NM_002074.5(GNB1):c.498-10C>T	GNB1		not provided	VCV002825107	1	1722045	1	1790606	2825107	2986192		NC_000001.11:1790605:G:A	single nucleotide variant	intron variant	Likely benign	Aug 5, 2023	criteria provided, single submitter
NM_002074.5(GNB1):c.498-13G>A	GNB1		not provided	VCV001168642	1	1722048	1	1790609	1168642	1153363	rs76013166	NC_000001.11:1790608:C:T	single nucleotide variant	intron variant	Benign	Feb 1, 2024	criteria provided, multiple submitters, no conflicts
NM_002074.5(GNB1):c.498-14C>T	GNB1		not provided	VCV001567958	1	1722049	1	1790610	1567958	1657466	rs773438465	NC_000001.11:1790609:G:A	single nucleotide variant	intron variant	Likely benign	Nov 13, 2023	criteria provided, single submitter
NM_002074.5(GNB1):c.497+16G>A	GNB1		not provided	VCV001660010	1	1724668	1	1793229	1660010	1606381	rs765646802	NC_000001.11:1793228:C:T	single nucleotide variant	intron variant	Likely benign	Nov 20, 2023	criteria provided, single submitter
NM_002074.5(GNB1):c.497+15C>T	GNB1		not provided	VCV001900487	1	1724669	1	1793230	1900487	1953824		NC_000001.11:1793229:G:A	single nucleotide variant	intron variant	Benign	Jan 31, 2022	criteria provided, single submitter
NM_002074.5(GNB1):c.497+13C>A	GNB1		not provided	VCV002814726	1	1724671	1	1793232	2814726	2973256		NC_000001.11:1793231:G:T	single nucleotide variant	intron variant	Likely benign	Nov 16, 2022	criteria provided, single submitter
NM_002074.5(GNB1):c.497+8C>T	GNB1		not provided	VCV002961864	1	1724676	1	1793237	2961864	3117026		NC_000001.11:1793236:G:A	single nucleotide variant	intron variant	Likely benign	Jan 18, 2024	criteria provided, single submitter
NM_002074.5(GNB1):c.497+7A>G	GNB1		not provided	VCV002128267	1	1724677	1	1793238	2128267	2182270		NC_000001.11:1793237:T:C	single nucleotide variant	intron variant	Likely benign	Nov 27, 2023	criteria provided, single submitter
NM_002074.5(GNB1):c.431-9C>T	GNB1		not provided	VCV001623916	1	1724759	1	1793320	1623916	1594683	rs774487395	NC_000001.11:1793319:G:A	single nucleotide variant	intron variant	Likely benign	Jul 13, 2021	criteria provided, single submitter
NM_002074.5(GNB1):c.431-4668T>C	GNB1		Intellectual disability, autosomal dominant 42	VCV001696698	1	1729418	1	1797979	1696698	1689100	rs2100607979	NC_000001.11:1797978:A:G	single nucleotide variant	intron variant	Uncertain significance	Aug 6, 2021	criteria provided, single submitter
NM_002074.5(GNB1):c.430+19A>C	GNB1		not provided	VCV003005574	1	1735839	1	1804400	3005574	3158166		NC_000001.11:1804399:T:G	single nucleotide variant	intron variant	Likely benign	Aug 28, 2023	criteria provided, single submitter
NM_002074.5(GNB1):c.430+9C>T	GNB1		not provided	VCV002902430	1	1735849	1	1804410	2902430	3061475		NC_000001.11:1804409:G:A	single nucleotide variant	intron variant	Likely benign	Dec 31, 2022	criteria provided, single submitter
NM_002074.5(GNB1):c.430+4C>T	GNB1		not provided	VCV001434580	1	1735854	1	1804415	1434580	1494396	rs764585029	NC_000001.11:1804414:G:A	single nucleotide variant	intron variant	Benign	Dec 26, 2022	criteria provided, single submitter
NM_002074.5(GNB1):c.268-7T>A	GNB1		not provided	VCV001316434	1	1736027	1	1804588	1316434	1308836	rs2100700072	NC_000001.11:1804587:A:T	single nucleotide variant	intron variant	Uncertain significance	Jan 7, 2020	criteria provided, single submitter
NM_002074.5(GNB1):c.268-11T>C	GNB1		not provided	VCV001918884	1	1736031	1	1804592	1918884	1971325		NC_000001.11:1804591:A:G	single nucleotide variant	intron variant	Likely benign	Jan 22, 2024	criteria provided, single submitter
NM_002074.5(GNB1):c.268-13T>C	GNB1		not provided	VCV001946610	1	1736033	1	1804594	1946610	1999017		NC_000001.11:1804593:A:G	single nucleotide variant	intron variant	Likely benign	Oct 28, 2022	criteria provided, single submitter
NM_002074.5(GNB1):c.267+19C>T	GNB1		not provided	VCV001165037	1	1737895	1	1806456	1165037	1153365	rs77354509	NC_000001.11:1806455:G:A	single nucleotide variant	intron variant	Benign	Feb 1, 2024	criteria provided, multiple submitters, no conflicts
NM_002074.5(GNB1):c.267+14G>A	GNB1		not provided	VCV001166897	1	1737900	1	1806461	1166897	1153366	rs17363334	NC_000001.11:1806460:C:T	single nucleotide variant	intron variant	Benign	Feb 1, 2024	criteria provided, multiple submitters, no conflicts
NM_002074.5(GNB1):c.267+7A>G	GNB1		not provided|Intellectual disability, autosomal dominant 42	VCV001032797	1	1737907	1	1806468	1032797	1019233	rs1646696544	NC_000001.11:1806467:T:C	single nucleotide variant	intron variant	Conflicting classifications of pathogenicity	Oct 12, 2023	criteria provided, conflicting classifications
NM_002074.5(GNB1):c.204-6C>T	GNB1		not provided	VCV002785713	1	1737983	1	1806544	2785713	2945560		NC_000001.11:1806543:G:A	single nucleotide variant	intron variant	Likely benign	Jun 10, 2023	criteria provided, single submitter
NM_002074.5(GNB1):c.204-7C>A	GNB1		not provided	VCV001383100	1	1737984	1	1806545	1383100	1509696	rs375820150	NC_000001.11:1806544:G:T	single nucleotide variant	intron variant	Likely benign	Nov 27, 2023	criteria provided, single submitter
NM_002074.5(GNB1):c.204-14G>A	GNB1		not provided	VCV001660420	1	1737991	1	1806552	1660420	1575743	rs748987967	NC_000001.11:1806551:C:T	single nucleotide variant	intron variant	Likely benign	Jun 5, 2023	criteria provided, single submitter
NM_002074.5(GNB1):c.204-20G>T	GNB1		not provided	VCV001536931	1	1737997	1	1806558	1536931	1533215	rs2100727233	NC_000001.11:1806557:C:A	single nucleotide variant	intron variant	Likely benign	Jul 18, 2022	criteria provided, single submitter
NM_002074.5(GNB1):c.203+18C>T	GNB1		not provided	VCV002873120	1	1747177	1	1815738	2873120	3034994		NC_000001.11:1815737:G:A	single nucleotide variant	intron variant	Likely benign	Jun 3, 2023	criteria provided, single submitter
NM_002074.5(GNB1):c.203+16A>G	GNB1		not provided	VCV002963900	1	1747179	1	1815740	2963900	3127314		NC_000001.11:1815739:T:C	single nucleotide variant	intron variant	Likely benign	Dec 11, 2023	criteria provided, single submitter
NM_002074.5(GNB1):c.203+13A>G	GNB1		not provided	VCV001938784	1	1747182	1	1815743	1938784	2004111		NC_000001.11:1815742:T:C	single nucleotide variant	intron variant	Likely benign	Feb 9, 2023	criteria provided, single submitter
NM_002074.5(GNB1):c.203+7G>A	GNB1		not provided	VCV001629269	1	1747188	1	1815749	1629269	1532054	rs202108846	NC_000001.11:1815748:C:T	single nucleotide variant	intron variant	Benign	Dec 6, 2023	criteria provided, single submitter
NM_002074.5(GNB1):c.203+6C>T	GNB1		not provided	VCV001904356	1	1747189	1	1815750	1904356	1964588		NC_000001.11:1815749:G:A	single nucleotide variant	intron variant	Benign	Aug 16, 2022	criteria provided, single submitter
NM_002074.5(GNB1):c.97-7T>C	GNB1		not provided	VCV002789957	1	1747308	1	1815869	2789957	2949799		NC_000001.11:1815868:A:G	single nucleotide variant	intron variant	Benign	Nov 20, 2023	criteria provided, single submitter
NM_002074.5(GNB1):c.97-10T>C	GNB1		not provided	VCV001639626	1	1747311	1	1815872	1639626	1647214	rs375781743	NC_000001.11:1815871:A:G	single nucleotide variant	intron variant	Likely benign	Jan 3, 2024	criteria provided, single submitter
NM_002074.5(GNB1):c.97-15G>A	GNB1		not provided	VCV002805042	1	1747316	1	1815877	2805042	2967426		NC_000001.11:1815876:C:T	single nucleotide variant	intron variant	Likely benign	Oct 22, 2023	criteria provided, single submitter
NM_002074.5(GNB1):c.97-17A>G	GNB1		not provided	VCV001556652	1	1747318	1	1815879	1556652	1592796	rs59787372	NC_000001.11:1815878:T:C	single nucleotide variant	intron variant	Benign	Feb 1, 2024	criteria provided, single submitter
NM_002074.5(GNB1):c.96+20C>T	GNB1		not provided	VCV001547319	1	1749256	1	1817817	1547319	1571862	rs199518971	NC_000001.11:1817816:G:A	single nucleotide variant	intron variant	Likely benign	Jan 29, 2024	criteria provided, single submitter
NM_002074.5(GNB1):c.96+17T>G	GNB1		not provided	VCV001958744	1	1749259	1	1817820	1958744	2012422		NC_000001.11:1817819:A:C	single nucleotide variant	intron variant	Likely benign	Oct 13, 2022	criteria provided, single submitter
NM_002074.5(GNB1):c.96+16G>C	GNB1		not provided	VCV001673164	1	1749260	1	1817821	1673164	1595351	rs1646877395	NC_000001.11:1817820:C:G	single nucleotide variant	intron variant	Likely benign	Jul 6, 2021	criteria provided, single submitter
NM_002074.5(GNB1):c.96+12C>G	GNB1		not provided	VCV001951778	1	1749264	1	1817825	1951778	2010632		NC_000001.11:1817824:G:C	single nucleotide variant	intron variant	Likely benign	Sep 16, 2022	criteria provided, single submitter
NM_002074.5(GNB1):c.96+7G>A	GNB1		not provided	VCV001563870	1	1749269	1	1817830	1563870	1588891	rs2100887865	NC_000001.11:1817829:C:T	single nucleotide variant	intron variant	Likely benign	Jul 5, 2022	criteria provided, single submitter
NM_002074.5(GNB1):c.58-8C>T	GNB1		not provided	VCV002743792	1	1749322	1	1817883	2743792	2907145		NC_000001.11:1817882:G:A	single nucleotide variant	intron variant	Likely benign	Jul 16, 2023	criteria provided, single submitter
NM_002074.5(GNB1):c.58-19C>T	GNB1		not provided	VCV002707144	1	1749333	1	1817894	2707144	2870717		NC_000001.11:1817893:G:A	single nucleotide variant	intron variant	Likely benign	Jan 3, 2024	criteria provided, single submitter
NM_002074.5(GNB1):c.57+17G>A	GNB1		not provided	VCV001662780	1	1756819	1	1825380	1662780	1555586	rs1176748830	NC_000001.11:1825379:C:T	single nucleotide variant	intron variant	Likely benign	Jan 19, 2024	criteria provided, single submitter
NM_002074.5(GNB1):c.1009A>C (p.Lys337Gln)	GNB1	K237Q, K337Q	not provided	VCV002733819	1	1718784	1	1787345	2733819	2898153		NC_000001.11:1787344:T:G	single nucleotide variant	missense variant	Uncertain significance	Dec 7, 2022	criteria provided, single submitter
NM_002074.5(GNB1):c.1007T>A (p.Leu336His)	GNB1	L236H, L336H	Intellectual disability, autosomal dominant 42	VCV001687407	1	1718786	1	1787347	1687407	1679700	rs2100450838	NC_000001.11:1787346:A:T	single nucleotide variant	missense variant	Uncertain significance	May 22, 2022	criteria provided, single submitter
NM_002074.5(GNB1):c.977C>G (p.Ala326Gly)	GNB1	A326G, A226G	not provided	VCV002106126	1	1718816	1	1787377	2106126	2162593		NC_000001.11:1787376:G:C	single nucleotide variant	missense variant	Uncertain significance	Mar 4, 2022	criteria provided, single submitter
NM_002074.5(GNB1):c.977C>A (p.Ala326Asp)	GNB1	A326D, A226D	not provided	VCV002104373	1	1718816	1	1787377	2104373	2162136		NC_000001.11:1787376:G:T	single nucleotide variant	missense variant	Uncertain significance	Jul 19, 2022	criteria provided, single submitter
NM_002074.5(GNB1):c.976G>A (p.Ala326Thr)	GNB1	A326T, A226T	Intellectual disability, autosomal dominant 42	VCV000224718	1	1718817	1	1787378	224718	226495	rs869312826	NC_000001.11:1787377:C:T	single nucleotide variant	missense variant	Likely pathogenic	Feb 2, 2022	criteria provided, single submitter
NM_002074.5(GNB1):c.971G>A (p.Gly324Asp)	GNB1	G224D, G324D	not provided	VCV002845761	1	1718822	1	1787383	2845761	3011960		NC_000001.11:1787382:C:T	single nucleotide variant	missense variant	Uncertain significance	Mar 14, 2023	criteria provided, single submitter
NM_002074.5(GNB1):c.970G>A (p.Gly324Ser)	GNB1	G224S, G324S	not provided	VCV002971542	1	1718823	1	1787384	2971542	3129335		NC_000001.11:1787383:C:T	single nucleotide variant	missense variant	Uncertain significance	Dec 8, 2023	criteria provided, single submitter
NM_002074.5(GNB1):c.955G>C (p.Gly319Arg)	GNB1	G219R, G319R	Intellectual disability, autosomal dominant 42	VCV002432202	1	1718838	1	1787399	2432202	2412711		NC_000001.11:1787398:C:G	single nucleotide variant	missense variant	Uncertain significance	Mar 13, 2020	criteria provided, single submitter
NM_002074.5(GNB1):c.943G>A (p.Val315Ile)	GNB1	V215I, V315I	not provided	VCV002972098	1	1718850	1	1787411	2972098	3139813		NC_000001.11:1787410:C:T	single nucleotide variant	missense variant	Uncertain significance	Dec 6, 2022	criteria provided, single submitter
NM_002074.5(GNB1):c.940C>T (p.Arg314Cys)	GNB1	R214C, R314C	not provided	VCV003369876	1	1718853	1	1787414	3369876	3529067		NC_000001.11:1787413:G:A	single nucleotide variant	missense variant	Uncertain significance	Apr 16, 2024	criteria provided, single submitter
NM_002074.5(GNB1):c.925G>A (p.Ala309Thr)	GNB1	A309T, A209T	not provided	VCV003001437	1	1718868	1	1787429	3001437	3164265		NC_000001.11:1787428:C:T	single nucleotide variant	missense variant	Uncertain significance	Feb 14, 2023	criteria provided, single submitter
NM_002074.5(GNB1):c.925G>T (p.Ala309Ser)	GNB1	A209S, A309S	not provided	VCV001376302	1	1718868	1	1787429	1376302	1466835	rs370929812	NC_000001.11:1787428:C:A	single nucleotide variant	missense variant	Uncertain significance	Oct 28, 2023	criteria provided, single submitter
NM_002074.5(GNB1):c.910C>T (p.Arg304Trp)	GNB1	R304W, R204W	not provided	VCV002038514	1	1720498	1	1789059	2038514	2101582		NC_000001.11:1789058:G:A	single nucleotide variant	missense variant	Likely benign	Jan 19, 2024	criteria provided, single submitter
NM_002074.5(GNB1):c.896C>T (p.Ala299Val)	GNB1	A299V, A199V	Inborn genetic diseases|not provided	VCV001506609	1	1720512	1	1789073	1506609	1430534	rs1646445742	NC_000001.11:1789072:G:A	single nucleotide variant	missense variant	Uncertain significance	Dec 4, 2023	criteria provided, multiple submitters, no conflicts
NM_002074.5(GNB1):c.891G>T (p.Trp297Cys)	GNB1	W197C, W297C	not provided	VCV001695873	1	1720517	1	1789078	1695873	1688282	rs2100479868	NC_000001.11:1789077:C:A	single nucleotide variant	missense variant	Uncertain significance	Jan 7, 2022	criteria provided, single submitter
NM_002074.5(GNB1):c.886G>A (p.Val296Ile)	GNB1	V196I, V296I	not provided	VCV001363932	1	1720522	1	1789083	1363932	1389752	rs1198479789	NC_000001.11:1789082:C:T	single nucleotide variant	missense variant	Uncertain significance	Jun 24, 2021	criteria provided, single submitter
NM_002074.5(GNB1):c.844G>A (p.Gly282Arg)	GNB1	G182R, G282R	not provided	VCV001929964	1	1720564	1	1789125	1929964	1981521		NC_000001.11:1789124:C:T	single nucleotide variant	missense variant	Uncertain significance	May 13, 2022	criteria provided, single submitter
NM_002074.5(GNB1):c.830C>G (p.Ser277Cys)	GNB1	S277C, S177C	not provided	VCV000452928	1	1720578	1	1789139	452928	442673	rs1553191757	NC_000001.11:1789138:G:C	single nucleotide variant	missense variant	Uncertain significance	Oct 17, 2017	criteria provided, single submitter
NM_002074.5(GNB1):c.815G>T (p.Gly272Val)	GNB1	G172V, G272V	not provided	VCV003252438	1	1720593	1	1789154	3252438	3411233		NC_000001.11:1789153:C:A	single nucleotide variant	missense variant	Uncertain significance	Jul 8, 2024	criteria provided, single submitter
NM_002074.5(GNB1):c.814G>A (p.Gly272Arg)	GNB1	G172R, G272R	Intellectual disability, autosomal dominant 42|Myelodysplastic syndrome|Acute lymphoid leukemia	VCV003024332	1	1720594	1	1789155	3024332	3184589		NC_000001.11:1789154:C:T	single nucleotide variant	missense variant	Likely pathogenic		criteria provided, single submitter
NM_002074.5(GNB1):c.805A>G (p.Ile269Val)	GNB1	I169V, I269V	not provided	VCV002693012	1	1720603	1	1789164	2693012	2863839		NC_000001.11:1789163:T:C	single nucleotide variant	missense variant	Uncertain significance	Jun 5, 2023	criteria provided, single submitter
NM_002074.5(GNB1):c.803A>T (p.Asn268Ile)	GNB1	N268I, N168I	not provided	VCV001461454	1	1720605	1	1789166	1461454	1498285	rs757342463	NC_000001.11:1789165:T:A	single nucleotide variant	missense variant	Uncertain significance	Dec 27, 2021	criteria provided, single submitter
NM_002074.5(GNB1):c.767G>A (p.Arg256His)	GNB1	R156H, R256H	not provided	VCV003239511	1	1720641	1	1789202	3239511	3398501		NC_000001.11:1789201:C:T	single nucleotide variant	missense variant	Uncertain significance	May 1, 2024	criteria provided, single submitter
NM_002074.5(GNB1):c.727A>G (p.Thr243Ala)	GNB1	T143A, T243A	Intellectual disability, autosomal dominant 42	VCV000995963	1	1720681	1	1789242	995963	983663	rs1394767075	NC_000001.11:1789241:T:C	single nucleotide variant	missense variant	not provided		no classification provided
NM_002074.5(GNB1):c.716A>G (p.Asn239Ser)	GNB1	N139S, N239S	not provided	VCV001396844	1	1720692	1	1789253	1396844	1414718	rs760166038	NC_000001.11:1789252:T:C	single nucleotide variant	missense variant	Uncertain significance	May 20, 2023	criteria provided, single submitter
NM_002074.5(GNB1):c.706C>T (p.Pro236Ser)	GNB1	P236S, P136S	not provided	VCV002758115	1	1720702	1	1789263	2758115	2914957		NC_000001.11:1789262:G:A	single nucleotide variant	missense variant	Uncertain significance	Sep 5, 2023	criteria provided, single submitter
NM_002074.5(GNB1):c.700T>C (p.Phe234Leu)	GNB1	F234L, F134L	not provided	VCV002837934	1	1720708	1	1789269	2837934	2992652		NC_000001.11:1789268:A:G	single nucleotide variant	missense variant	Uncertain significance	Feb 16, 2023	criteria provided, single submitter
NM_002074.5(GNB1):c.694A>G (p.Ile232Val)	GNB1	I132V, I232V	not provided	VCV002822074	1	1721839	1	1790400	2822074	2981877		NC_000001.11:1790399:T:C	single nucleotide variant	missense variant	Uncertain significance	Dec 18, 2022	criteria provided, single submitter
NM_002074.5(GNB1):c.691G>A (p.Ala231Thr)	GNB1	A131T, A231T	Inborn genetic diseases	VCV003100587	1	1721842	1	1790403	3100587	3262074		NC_000001.11:1790402:C:T	single nucleotide variant	missense variant	Uncertain significance	Nov 17, 2023	criteria provided, single submitter
NM_002074.5(GNB1):c.687C>G (p.Ile229Met)	GNB1	I129M, I229M	not provided	VCV002430986	1	1721846	1	1790407	2430986	2404493		NC_000001.11:1790406:G:C	single nucleotide variant	missense variant	Uncertain significance	Aug 24, 2022	criteria provided, single submitter
NM_002074.5(GNB1):c.676G>A (p.Glu226Lys)	GNB1	E126K, E226K	not provided	VCV002718859	1	1721857	1	1790418	2718859	2873382		NC_000001.11:1790417:C:T	single nucleotide variant	missense variant	Benign	Nov 27, 2023	criteria provided, single submitter
NM_002074.5(GNB1):c.664T>G (p.Phe222Val)	GNB1	F222V, F122V	not provided	VCV001996269	1	1721869	1	1790430	1996269	2056779		NC_000001.11:1790429:A:C	single nucleotide variant	missense variant	Likely benign	Nov 22, 2022	criteria provided, single submitter
NM_002074.5(GNB1):c.656G>A (p.Arg219Gln)	GNB1	R219Q, R119Q	not provided|Inborn genetic diseases	VCV001424675	1	1721877	1	1790438	1424675	1438551	rs763840033	NC_000001.11:1790437:C:T	single nucleotide variant	missense variant	Benign/Likely benign	Jan 17, 2024	criteria provided, multiple submitters, no conflicts
NM_002074.5(GNB1):c.650T>C (p.Met217Thr)	GNB1	M117T, M217T	not provided	VCV001551623	1	1721883	1	1790444	1551623	1551402	rs1306862146	NC_000001.11:1790443:A:G	single nucleotide variant	missense variant	Benign	Dec 6, 2023	criteria provided, single submitter
NM_002074.5(GNB1):c.649A>G (p.Met217Val)	GNB1	M117V, M217V	not provided	VCV002824337	1	1721884	1	1790445	2824337	2979011		NC_000001.11:1790444:T:C	single nucleotide variant	missense variant	Uncertain significance	Dec 26, 2022	criteria provided, single submitter
NM_002074.5(GNB1):c.598G>A (p.Val200Ile)	GNB1	V200I, V100I	not provided	VCV001508591	1	1721935	1	1790496	1508591	1439802	rs950679231	NC_000001.11:1790495:C:T	single nucleotide variant	missense variant	Uncertain significance	Sep 15, 2022	criteria provided, single submitter
NM_002074.5(GNB1):c.586A>G (p.Thr196Ala)	GNB1	T96A, T196A	not provided	VCV002803121	1	1721947	1	1790508	2803121	2966802		NC_000001.11:1790507:T:C	single nucleotide variant	missense variant	Uncertain significance	May 5, 2023	criteria provided, single submitter
NM_002074.5(GNB1):c.586A>T (p.Thr196Ser)	GNB1	T96S, T196S	not provided	VCV001950296	1	1721947	1	1790508	1950296	2000123		NC_000001.11:1790507:T:A	single nucleotide variant	missense variant	Uncertain significance	Mar 12, 2022	criteria provided, single submitter
NM_002074.5(GNB1):c.581C>T (p.Pro194Leu)	GNB1	P194L, P94L	not provided	VCV002829263	1	1721952	1	1790513	2829263	2980092		NC_000001.11:1790512:G:A	single nucleotide variant	missense variant	Benign	Aug 10, 2023	criteria provided, single submitter
NM_002074.5(GNB1):c.550A>C (p.Thr184Pro)	GNB1	T184P, T84P	not provided	VCV002763833	1	1721983	1	1790544	2763833	2922002		NC_000001.11:1790543:T:G	single nucleotide variant	missense variant	Uncertain significance	Dec 5, 2023	criteria provided, single submitter
NM_002074.5(GNB1):c.550A>G (p.Thr184Ala)	GNB1	T184A, T84A	not provided	VCV001524196	1	1721983	1	1790544	1524196	1382758	rs2100503859	NC_000001.11:1790543:T:C	single nucleotide variant	missense variant	Uncertain significance	Oct 26, 2022	criteria provided, single submitter
NM_002074.5(GNB1):c.536C>T (p.Thr179Met)	GNB1	T179M, T79M	not provided	VCV002070257	1	1721997	1	1790558	2070257	2119490		NC_000001.11:1790557:G:A	single nucleotide variant	missense variant	Uncertain significance	Nov 22, 2022	criteria provided, single submitter
NM_002074.5(GNB1):c.520G>A (p.Gly174Ser)	GNB1	G74S, G174S	not provided|Intellectual disability, autosomal dominant 42	VCV001033473	1	1722013	1	1790574	1033473	1019232	rs779612138	NC_000001.11:1790573:C:T	single nucleotide variant	missense variant	Conflicting classifications of pathogenicity	Aug 17, 2023	criteria provided, conflicting classifications
NM_002074.5(GNB1):c.516G>C (p.Glu172Asp)	GNB1	E172D, E72D	not provided	VCV001610568	1	1722017	1	1790578	1610568	1585386	rs2100504401	NC_000001.11:1790577:C:G	single nucleotide variant	missense variant	Benign	Jun 4, 2022	criteria provided, single submitter
NM_002074.5(GNB1):c.513C>G (p.Ile171Met)	GNB1	I171M, I71M	not provided	VCV003370688	1	1722020	1	1790581	3370688	3529878		NC_000001.11:1790580:G:C	single nucleotide variant	missense variant	Uncertain significance	Mar 7, 2024	criteria provided, single submitter
NM_002074.5(GNB1):c.510C>G (p.Asp170Glu)	GNB1	D70E, D170E	not provided	VCV002857915	1	1722023	1	1790584	2857915	3017962		NC_000001.11:1790583:G:C	single nucleotide variant	missense variant	Uncertain significance	Apr 20, 2023	criteria provided, single submitter
NM_002074.5(GNB1):c.497G>C (p.Cys166Ser)	GNB1	C166S, C66S	not provided	VCV003363353	1	1724684	1	1793245	3363353	3522562		NC_000001.11:1793244:C:G	single nucleotide variant	missense variant	Uncertain significance	Nov 10, 2023	criteria provided, single submitter
NM_002074.5(GNB1):c.496T>C (p.Cys166Arg)	GNB1	C166R, C66R	Intellectual disability, autosomal dominant 42	VCV001048759	1	1724685	1	1793246	1048759	1036846	rs2100546091	NC_000001.11:1793245:A:G	single nucleotide variant	missense variant	Likely pathogenic	Oct 16, 2020	no assertion criteria provided
NM_002074.5(GNB1):c.487G>A (p.Asp163Asn)	GNB1	D163N, D63N	Intellectual disability, autosomal dominant 42|not provided	VCV001285499	1	1724694	1	1793255	1285499	1275342	rs2100546220	NC_000001.11:1793254:C:T	single nucleotide variant	missense variant	Conflicting classifications of pathogenicity	Oct 3, 2022	criteria provided, conflicting classifications
NM_002074.5(GNB1):c.472G>A (p.Val158Ile)	GNB1	V158I, V58I	not provided	VCV001594453	1	1724709	1	1793270	1594453	1568457	rs778110947	NC_000001.11:1793269:C:T	single nucleotide variant	missense variant	Benign	Aug 20, 2023	criteria provided, single submitter
NM_002074.5(GNB1):c.459T>G (p.Asp153Glu)	GNB1	D53E, D153E	not provided	VCV002718799	1	1724722	1	1793283	2718799	2873322		NC_000001.11:1793282:A:C	single nucleotide variant	missense variant	Uncertain significance	Jun 18, 2023	criteria provided, single submitter
NM_002074.5(GNB1):c.458A>G (p.Asp153Gly)	GNB1	D153G, D53G	not provided	VCV001711202	1	1724723	1	1793284	1711202	1709618		NC_000001.11:1793283:T:C	single nucleotide variant	missense variant	Uncertain significance	Aug 1, 2022	criteria provided, single submitter
NM_002074.5(GNB1):c.449G>T (p.Arg150Leu)	GNB1	R150L, R50L	not provided	VCV001391295	1	1724732	1	1793293	1391295	1389975	rs2100546595	NC_000001.11:1793292:C:A	single nucleotide variant	missense variant	Uncertain significance	Nov 4, 2021	criteria provided, single submitter
NM_002074.5(GNB1):c.445T>A (p.Cys149Ser)	GNB1	C149S, C49S	not provided	VCV002638063	1	1724736	1	1793297	2638063	2805540		NC_000001.11:1793296:A:T	single nucleotide variant	missense variant	Uncertain significance	Sep 1, 2023	criteria provided, single submitter
NM_002074.5(GNB1):c.401G>A (p.Arg134His)	GNB1	R34H, R134H	not provided	VCV001956570	1	1735887	1	1804448	1956570	2015416		NC_000001.11:1804447:C:T	single nucleotide variant	missense variant	Uncertain significance	Sep 23, 2022	criteria provided, single submitter
NM_002074.5(GNB1):c.392G>A (p.Gly131Glu)	GNB1	G131E, G31E	not provided	VCV003372534	1	1735896	1	1804457	3372534	3531724		NC_000001.11:1804456:C:T	single nucleotide variant	missense variant	Uncertain significance	Apr 12, 2024	criteria provided, single submitter
NM_002074.5(GNB1):c.388G>A (p.Glu130Lys)	GNB1	E130K, E30K	not provided|Intellectual disability, autosomal dominant 42	VCV000452797	1	1735900	1	1804461	452797	442675	rs1553194155	NC_000001.11:1804460:C:T	single nucleotide variant	missense variant	Pathogenic	Sep 23, 2024	criteria provided, multiple submitters, no conflicts
NM_002074.5(GNB1):c.386G>A (p.Arg129His)	GNB1	R129H, R29H	Inborn genetic diseases	VCV002477976	1	1735902	1	1804463	2477976	2450599		NC_000001.11:1804462:C:T	single nucleotide variant	missense variant	Uncertain significance	Jan 23, 2023	criteria provided, single submitter
NM_002074.5(GNB1):c.374A>G (p.Asn125Ser)	GNB1	N125S, N25S	not provided	VCV001472005	1	1735914	1	1804475	1472005	1385153	rs150628410	NC_000001.11:1804474:T:C	single nucleotide variant	missense variant	Benign	Dec 22, 2022	criteria provided, single submitter
NM_002074.5(GNB1):c.353A>G (p.Asp118Gly)	GNB1	D118G, D18G	not provided|Inborn genetic diseases	VCV000521213	1	1735935	1	1804496	521213	511195	rs1553194162	NC_000001.11:1804495:T:C	single nucleotide variant	missense variant	Pathogenic	Oct 31, 2022	criteria provided, multiple submitters, no conflicts
NM_002074.5(GNB1):c.352G>T (p.Asp118Tyr)	GNB1	D118Y, D18Y	not provided	VCV000812755	1	1735936	1	1804497	812755	800980	rs1570640673	NC_000001.11:1804496:C:A	single nucleotide variant	missense variant	Pathogenic	Oct 1, 2022	criteria provided, multiple submitters, no conflicts
NM_002074.5(GNB1):c.347G>T (p.Gly116Val)	GNB1	G116V, G16V	not provided	VCV001194565	1	1735941	1	1804502	1194565	1182812	rs1646670079	NC_000001.11:1804501:C:A	single nucleotide variant	missense variant	Pathogenic	Sep 18, 2020	criteria provided, single submitter
NM_002074.5(GNB1):c.347G>A (p.Gly116Asp)	GNB1	G116D, G16D	not provided|See cases	VCV000996797	1	1735941	1	1804502	996797	984480	rs1646670079	NC_000001.11:1804501:C:T	single nucleotide variant	missense variant	Conflicting classifications of pathogenicity	Feb 1, 2021	criteria provided, conflicting classifications
NM_002074.5(GNB1):c.346G>A (p.Gly116Ser)	GNB1	G116S, G16S	not provided	VCV000444149	1	1735942	1	1804503	444149	437789	rs1231842600	NC_000001.11:1804502:C:T	single nucleotide variant	missense variant	Conflicting classifications of pathogenicity	Feb 13, 2023	criteria provided, conflicting classifications
NM_002074.5(GNB1):c.343G>A (p.Gly115Ser)	GNB1	G115S, G15S	See cases|Intellectual disability|not provided	VCV000981265	1	1735945	1	1804506	981265	969332	rs1646670170	NC_000001.11:1804505:C:T	single nucleotide variant	missense variant	Conflicting classifications of pathogenicity	May 24, 2024	criteria provided, conflicting classifications
NM_002074.5(GNB1):c.341G>A (p.Cys114Tyr)	GNB1	C114Y, C14Y	Intellectual disability, autosomal dominant 42	VCV001315581	1	1735947	1	1804508	1315581	1305841	rs1313820360	NC_000001.11:1804507:C:T	single nucleotide variant	missense variant	Pathogenic	Nov 2, 2021	no assertion criteria provided
NM_002074.5(GNB1):c.332A>G (p.Tyr111Cys)	GNB1	Y111C, Y11C	Intellectual disability, autosomal dominant 42	VCV003066080	1	1735956	1	1804517	3066080	3226093		NC_000001.11:1804516:T:C	single nucleotide variant	missense variant	Uncertain significance	May 8, 2023	no assertion criteria provided
NM_002074.5(GNB1):c.326G>A (p.Gly109Glu)	GNB1	G109E, G9E	Intellectual disability, autosomal dominant 42	VCV001710142	1	1735962	1	1804523	1710142	1708536		NC_000001.11:1804522:C:T	single nucleotide variant	missense variant	Likely pathogenic	Oct 5, 2022	no assertion criteria provided
NM_002074.5(GNB1):c.320C>T (p.Pro107Leu)	GNB1	P107L, P7L	not provided	VCV002839581	1	1735968	1	1804529	2839581	2993018		NC_000001.11:1804528:G:A	single nucleotide variant	missense variant	Likely benign	Aug 17, 2023	criteria provided, single submitter
NM_002074.5(GNB1):c.364T>C (p.Ser122Pro)	GNB1	S122P, S22P	not provided	VCV003360136					3360136	3519347			single nucleotide variant	missense variant	Uncertain significance	Jun 20, 2023	criteria provided, single submitter
NM_002074.5(GNB1):c.303G>A (p.Met101Ile)	GNB1	M101I, M1I	not provided	VCV002002475	1	1735985	1	1804546	2002475	2061699		NC_000001.11:1804545:C:T	single nucleotide variant	missense variant|initiator_codon_variant	Uncertain significance	Jun 5, 2022	criteria provided, single submitter
NM_002074.5(GNB1):c.301A>G (p.Met101Val)	GNB1	M101V, M1V	Intellectual disability, autosomal dominant 42|not provided	VCV000224717	1	1735987	1	1804548	224717	226496	rs869312825	NC_000001.11:1804547:T:C	single nucleotide variant	missense variant|initiator_codon_variant	Pathogenic	Nov 18, 2024	criteria provided, multiple submitters, no conflicts
NM_002074.5(GNB1):c.184C>T (p.His62Tyr)	GNB1	H62Y	not provided	VCV002701836	1	1747214	1	1815775	2701836	2859419		NC_000001.11:1815774:G:A	single nucleotide variant	missense variant|intron variant	Uncertain significance	Dec 9, 2023	criteria provided, single submitter
NM_002074.5(GNB1):c.183G>T (p.Met61Ile)	GNB1	M61I	Intellectual disability, autosomal dominant 42	VCV002444031	1	1747215	1	1815776	2444031	2417765		NC_000001.11:1815775:C:A	single nucleotide variant	missense variant|intron variant	Likely pathogenic	Feb 23, 2023	criteria provided, single submitter
NM_002074.5(GNB1):c.178G>A (p.Ala60Thr)	GNB1	A60T	not provided|Intellectual disability, autosomal dominant 42	VCV001029408	1	1747220	1	1815781	1029408	1015593	rs1646845570	NC_000001.11:1815780:C:T	single nucleotide variant	missense variant|intron variant	Uncertain significance	Dec 20, 2023	criteria provided, multiple submitters, no conflicts
NM_002074.5(GNB1):c.170A>C (p.Lys57Thr)	GNB1	K57T	not provided	VCV000916054	1	1747228	1	1815789	916054	904274	rs747183517	NC_000001.11:1815788:T:G	single nucleotide variant	missense variant|intron variant	Likely pathogenic	Feb 4, 2020	criteria provided, single submitter
NM_002074.5(GNB1):c.169A>G (p.Lys57Glu)	GNB1	K57E	not provided	VCV002065663	1	1747229	1	1815790	2065663	2118351		NC_000001.11:1815789:T:C	single nucleotide variant	missense variant|intron variant	Uncertain significance	Oct 28, 2023	criteria provided, single submitter
NM_002074.5(GNB1):c.163C>G (p.Leu55Val)	GNB1	L55V	not provided	VCV001321652	1	1747235	1	1815796	1321652	1311934	rs2100858599	NC_000001.11:1815795:G:C	single nucleotide variant	missense variant|intron variant	Pathogenic	Nov 12, 2021	criteria provided, single submitter
NM_002074.5(GNB1):c.158G>A (p.Gly53Glu)	GNB1	G53E	Intellectual disability, autosomal dominant 42	VCV000617622	1	1747240	1	1815801	617622	609017	rs1557898800	NC_000001.11:1815800:C:T	single nucleotide variant	missense variant|intron variant	Likely pathogenic	Sep 13, 2018	no assertion criteria provided
NM_002074.5(GNB1):c.154C>T (p.Arg52Trp)	GNB1	R52W	not provided	VCV001326280	1	1747244	1	1815805	1326280	1316698	rs2100858748	NC_000001.11:1815804:G:A	single nucleotide variant	missense variant|intron variant	Conflicting classifications of pathogenicity	Jun 3, 2022	criteria provided, conflicting classifications
NM_002074.5(GNB1):c.146G>C (p.Arg49Thr)	GNB1	R49T	not provided	VCV001506354	1	1747252	1	1815813	1506354	1430279	rs2100858866	NC_000001.11:1815812:C:G	single nucleotide variant	missense variant|intron variant	Uncertain significance	Mar 19, 2022	criteria provided, single submitter
NM_002074.5(GNB1):c.137G>A (p.Arg46His)	GNB1	R46H	not provided	VCV001517449	1	1747261	1	1815822	1517449	1420352	rs2100858963	NC_000001.11:1815821:C:T	single nucleotide variant	missense variant|intron variant	Uncertain significance	Jun 14, 2021	criteria provided, single submitter
NM_002074.5(GNB1):c.114C>G (p.Asp38Glu)	GNB1	D38E	not provided	VCV002638064	1	1747284	1	1815845	2638064	2805541		NC_000001.11:1815844:G:C	single nucleotide variant	missense variant|intron variant	Uncertain significance	May 1, 2022	criteria provided, single submitter
NM_002074.5(GNB1):c.113A>G (p.Asp38Gly)	GNB1	D38G	not provided	VCV003375662	1	1747285	1	1815846	3375662	3534842		NC_000001.11:1815845:T:C	single nucleotide variant	missense variant|intron variant	Uncertain significance	May 8, 2024	criteria provided, single submitter
NM_002074.5(GNB1):c.109A>G (p.Ile37Val)	GNB1	I37V	not provided	VCV003373730	1	1747289	1	1815850	3373730	3532918		NC_000001.11:1815849:T:C	single nucleotide variant	missense variant|intron variant	Uncertain significance	Mar 6, 2024	criteria provided, single submitter
NM_002074.5(GNB1):c.103A>G (p.Asn35Asp)	GNB1	N35D	GNB1-related disorder	VCV003346428	1	1747295	1	1815856	3346428	3504778		NC_000001.11:1815855:T:C	single nucleotide variant	missense variant|intron variant	Uncertain significance	Aug 5, 2024	no assertion criteria provided
NM_002074.5(GNB1):c.99C>G (p.Ile33Met)	GNB1	I33M	not specified	VCV002637604	1	1747299	1	1815860	2637604	2805083		NC_000001.11:1815859:G:C	single nucleotide variant	missense variant|intron variant	Uncertain significance	Oct 5, 2023	criteria provided, single submitter
NM_002074.5(GNB1):c.85A>G (p.Thr29Ala)	GNB1	T29A	Inborn genetic diseases|not provided	VCV002347050	1	1749287	1	1817848	2347050	1944869		NC_000001.11:1817847:T:C	single nucleotide variant	missense variant|intron variant	Benign/Likely benign	Nov 27, 2023	criteria provided, multiple submitters, no conflicts
NM_002074.5(GNB1):c.82G>A (p.Ala28Thr)	GNB1	A28T	not provided	VCV001437355	1	1749290	1	1817851	1437355	1513971	rs2100888232	NC_000001.11:1817850:C:T	single nucleotide variant	missense variant|intron variant	Uncertain significance	Mar 10, 2022	criteria provided, single submitter
NM_002074.5(GNB1):c.76G>A (p.Ala26Thr)	GNB1	A26T	not provided	VCV002076600	1	1749296	1	1817857	2076600	2138403		NC_000001.11:1817856:C:T	single nucleotide variant	missense variant|intron variant	Benign	Oct 6, 2023	criteria provided, single submitter
NM_002074.5(GNB1):c.61G>T (p.Ala21Ser)	GNB1	A21S	not provided	VCV001670433	1	1749311	1	1817872	1670433	1635798	rs780752397	NC_000001.11:1817871:C:A	single nucleotide variant	missense variant|intron variant	Likely benign	Oct 13, 2023	criteria provided, single submitter
NM_002074.5(GNB1):c.867C>A (p.Tyr289Ter)	GNB1	Y289*, Y189*	not provided	VCV001385542	1	1720541	1	1789102	1385542	1460691	rs771603036	NC_000001.11:1789101:G:T	single nucleotide variant	nonsense	Uncertain significance	Oct 30, 2020	criteria provided, single submitter
NM_002074.5(GNB1):c.640C>T (p.Arg214Ter)	GNB1	R114*, R214*	Inborn genetic diseases	VCV000986264	1	1721893	1	1790454	986264	973153	rs1002519501	NC_000001.11:1790453:G:A	single nucleotide variant	nonsense	Pathogenic	Aug 17, 2018	criteria provided, single submitter
NM_002074.5(GNB1):c.188G>A (p.Trp63Ter)	GNB1	W63*	Inborn genetic diseases	VCV003281766	1	1747210	1	1815771	3281766	3443573		NC_000001.11:1815770:C:T	single nucleotide variant	nonsense|intron variant	Pathogenic	May 8, 2024	criteria provided, single submitter
NM_002074.5(GNB1):c.917-1G>T	GNB1		Intellectual disability, autosomal dominant 42	VCV001315579	1	1718877	1	1787438	1315579	1305839	rs2100451989	NC_000001.11:1787437:C:A	single nucleotide variant	splice acceptor variant	Pathogenic	Nov 3, 2021	no assertion criteria provided
NM_002074.5(GNB1):c.917-2A>G	GNB1		not provided	VCV001200272	1	1718878	1	1787439	1200272	1189514	rs2100452011	NC_000001.11:1787438:T:C	single nucleotide variant	splice acceptor variant	Likely pathogenic	Jul 15, 2019	criteria provided, single submitter
NM_002074.5(GNB1):c.700-1G>T	GNB1		not provided	VCV000870212	1	1720709	1	1789270	870212	858384	rs1646448461	NC_000001.11:1789269:C:A	single nucleotide variant	splice acceptor variant	Likely pathogenic	Mar 10, 2020	criteria provided, single submitter
NM_002074.5(GNB1):c.498-2A>G	GNB1		Autosomal dominant non-syndromic intellectual disability	VCV002442801	1	1722037	1	1790598	2442801	2416524		NC_000001.11:1790597:T:C	single nucleotide variant	splice acceptor variant	Likely pathogenic	Oct 12, 2023	criteria provided, single submitter
NM_002074.5(GNB1):c.268-1G>T	GNB1		Intellectual disability, autosomal dominant 42	VCV001315576	1	1736021	1	1804582	1315576	1305836	rs2100699964	NC_000001.11:1804581:C:A	single nucleotide variant	splice acceptor variant	Pathogenic	Nov 2, 2021	no assertion criteria provided
NM_002074.5(GNB1):c.97-2A>G	GNB1		GNB1-related disorder	VCV002631640	1	1747303	1	1815864	2631640	2801174		NC_000001.11:1815863:T:C	single nucleotide variant	splice acceptor variant|intron variant	Uncertain significance	Aug 4, 2023	criteria provided, single submitter
NM_002074.5(GNB1):c.916+1G>T	GNB1		not provided	VCV002703061	1	1720491	1	1789052	2703061	2862757		NC_000001.11:1789051:C:A	single nucleotide variant	splice donor variant	Pathogenic	Dec 14, 2023	criteria provided, single submitter
NM_002074.5(GNB1):c.1022A>C (p.Ter341Ser)	GNB1		not provided	VCV001326133	1	1718771	1	1787332	1326133	1316392	rs747120803	NC_000001.11:1787331:T:G	single nucleotide variant	stop lost	Uncertain significance	Nov 17, 2021	criteria provided, single submitter
NM_002074.5(GNB1):c.1022A>G (p.Ter341=)	GNB1		not provided	VCV001644422	1	1718771	1	1787332	1644422	1564463	rs747120803	NC_000001.11:1787331:T:C	single nucleotide variant	synonymous variant	Likely benign	Dec 27, 2023	criteria provided, single submitter
NM_002074.5(GNB1):c.984G>A (p.Ala328=)	GNB1		not provided	VCV001637273	1	1718809	1	1787370	1637273	1525301	rs139152573	NC_000001.11:1787369:C:T	single nucleotide variant	synonymous variant	Likely benign	Dec 20, 2023	criteria provided, single submitter
NM_002074.5(GNB1):c.966C>T (p.Asp322=)	GNB1		not provided	VCV002150496	1	1718827	1	1787388	2150496	1891875		NC_000001.11:1787387:G:A	single nucleotide variant	synonymous variant	Likely benign	Jul 9, 2023	criteria provided, single submitter
NM_002074.5(GNB1):c.957C>T (p.Gly319=)	GNB1		not provided	VCV002155798	1	1718836	1	1787397	2155798	1889397		NC_000001.11:1787396:G:A	single nucleotide variant	synonymous variant	Likely benign	Jul 1, 2024	criteria provided, multiple submitters, no conflicts
NM_002074.5(GNB1):c.951C>T (p.Cys317=)	GNB1		not provided	VCV001615500	1	1718842	1	1787403	1615500	1547442	rs748316743	NC_000001.11:1787402:G:A	single nucleotide variant	synonymous variant	Likely benign	Oct 9, 2023	criteria provided, single submitter
NM_002074.5(GNB1):c.942C>T (p.Arg314=)	GNB1		not provided	VCV001298397	1	1718851	1	1787412	1298397	1288259	rs147191951	NC_000001.11:1787411:G:A	single nucleotide variant	synonymous variant	Likely benign	Dec 7, 2023	criteria provided, multiple submitters, no conflicts
NM_002074.5(GNB1):c.936C>T (p.Asp312=)	GNB1		not provided	VCV001938436	1	1718857	1	1787418	1938436	1993866		NC_000001.11:1787417:G:A	single nucleotide variant	synonymous variant	Likely benign	Nov 8, 2022	criteria provided, single submitter
NM_002074.5(GNB1):c.930G>T (p.Gly310=)	GNB1		not provided	VCV002978644	1	1718863	1	1787424	2978644	3131250		NC_000001.11:1787423:C:A	single nucleotide variant	synonymous variant	Likely benign	Jan 14, 2024	criteria provided, single submitter
NM_002074.5(GNB1):c.921C>T (p.Val307=)	GNB1		not provided	VCV001943226	1	1718872	1	1787433	1943226	1998214		NC_000001.11:1787432:G:A	single nucleotide variant	synonymous variant	Likely benign	Aug 12, 2022	criteria provided, single submitter
NM_002074.5(GNB1):c.906C>T (p.Ala302=)	GNB1		not provided	VCV002990724	1	1720502	1	1789063	2990724	3154908		NC_000001.11:1789062:G:A	single nucleotide variant	synonymous variant	Likely benign	Aug 10, 2023	criteria provided, single submitter
NM_002074.5(GNB1):c.900C>T (p.Leu300=)	GNB1		not provided	VCV001601253	1	1720508	1	1789069	1601253	1610458	rs151237596	NC_000001.11:1789068:G:A	single nucleotide variant	synonymous variant	Benign	Jan 26, 2024	criteria provided, multiple submitters, no conflicts
NM_002074.5(GNB1):c.888C>A (p.Val296=)	GNB1		not provided	VCV002748604	1	1720520	1	1789081	2748604	2918856		NC_000001.11:1789080:G:T	single nucleotide variant	synonymous variant	Likely benign	Jul 31, 2023	criteria provided, single submitter
NM_002074.5(GNB1):c.885C>T (p.Asn295=)	GNB1		not provided	VCV001166495	1	1720523	1	1789084	1166495	1153362	rs148709494	NC_000001.11:1789083:G:A	single nucleotide variant	synonymous variant	Benign/Likely benign	Sep 1, 2024	criteria provided, multiple submitters, no conflicts
NM_002074.5(GNB1):c.867C>T (p.Tyr289=)	GNB1		not provided	VCV000444148	1	1720541	1	1789102	444148	437788	rs771603036	NC_000001.11:1789101:G:A	single nucleotide variant	synonymous variant	Conflicting classifications of pathogenicity	Dec 22, 2023	criteria provided, conflicting classifications
NM_002074.5(GNB1):c.861T>G (p.Ala287=)	GNB1		not provided	VCV002880806	1	1720547	1	1789108	2880806	3042404		NC_000001.11:1789107:A:C	single nucleotide variant	synonymous variant	Likely benign	Dec 19, 2023	criteria provided, single submitter
NM_002074.5(GNB1):c.861T>C (p.Ala287=)	GNB1		not provided	VCV001564182	1	1720547	1	1789108	1564182	1589203	rs151315046	NC_000001.11:1789107:A:G	single nucleotide variant	synonymous variant	Likely benign	Dec 11, 2023	criteria provided, multiple submitters, no conflicts
NM_002074.5(GNB1):c.852C>T (p.Leu284=)	GNB1		not provided	VCV001530429	1	1720556	1	1789117	1530429	1582214	rs770504056	NC_000001.11:1789116:G:A	single nucleotide variant	synonymous variant	Likely benign	Jul 28, 2022	criteria provided, single submitter
NM_002074.5(GNB1):c.849C>T (p.Arg283=)	GNB1		not provided	VCV002799699	1	1720559	1	1789120	2799699	2955639		NC_000001.11:1789119:G:A	single nucleotide variant	synonymous variant	Likely benign	May 23, 2023	criteria provided, single submitter
NM_002074.5(GNB1):c.846G>T (p.Gly282=)	GNB1		not provided	VCV002075569	1	1720562	1	1789123	2075569	2130917		NC_000001.11:1789122:C:A	single nucleotide variant	synonymous variant	Likely benign	Jan 5, 2022	criteria provided, single submitter
NM_002074.5(GNB1):c.843C>T (p.Ser281=)	GNB1		not provided	VCV001934778	1	1720565	1	1789126	1934778	1985902		NC_000001.11:1789125:G:A	single nucleotide variant	synonymous variant	Likely benign	Jan 14, 2024	criteria provided, single submitter
NM_002074.5(GNB1):c.834C>T (p.Phe278=)	GNB1		not provided	VCV002123238	1	1720574	1	1789135	2123238	2181131		NC_000001.11:1789134:G:A	single nucleotide variant	synonymous variant	Likely benign	Apr 12, 2022	criteria provided, single submitter
NM_002074.5(GNB1):c.831C>T (p.Ser277=)	GNB1		not provided	VCV001553164	1	1720577	1	1789138	1553164	1552948	rs1329742082	NC_000001.11:1789137:G:A	single nucleotide variant	synonymous variant	Likely benign	Apr 23, 2021	criteria provided, single submitter
NM_002074.5(GNB1):c.825T>C (p.Ser275=)	GNB1		not provided	VCV002109083	1	1720583	1	1789144	2109083	2166948		NC_000001.11:1789143:A:G	single nucleotide variant	synonymous variant	Likely benign	May 10, 2022	criteria provided, single submitter
NM_002074.5(GNB1):c.822C>T (p.Thr274=)	GNB1		not provided	VCV003007661	1	1720586	1	1789147	3007661	3169237		NC_000001.11:1789146:G:A	single nucleotide variant	synonymous variant	Likely benign	Oct 13, 2023	criteria provided, single submitter
NM_002074.5(GNB1):c.816G>A (p.Gly272=)	GNB1		not provided	VCV001913101	1	1720592	1	1789153	1913101	1977202		NC_000001.11:1789152:C:T	single nucleotide variant	synonymous variant	Likely benign	Jun 9, 2022	criteria provided, single submitter
NM_002074.5(GNB1):c.798T>C (p.His266=)	GNB1		not provided	VCV001921376	1	1720610	1	1789171	1921376	1969065		NC_000001.11:1789170:A:G	single nucleotide variant	synonymous variant	Likely benign	Nov 11, 2023	criteria provided, single submitter
NM_002074.5(GNB1):c.792C>T (p.Tyr264=)	GNB1		not provided	VCV001643200	1	1720616	1	1789177	1643200	1587158	rs201256388	NC_000001.11:1789176:G:A	single nucleotide variant	synonymous variant	Likely benign	Jan 5, 2024	criteria provided, single submitter
NM_002074.5(GNB1):c.774C>T (p.Asp258=)	GNB1		not provided	VCV002130745	1	1720634	1	1789195	2130745	2186040		NC_000001.11:1789194:G:A	single nucleotide variant	synonymous variant	Likely benign	Apr 25, 2022	criteria provided, single submitter
NM_002074.5(GNB1):c.756G>A (p.Leu252=)	GNB1		not provided	VCV003001438	1	1720652	1	1789213	3001438	3164266		NC_000001.11:1789212:C:T	single nucleotide variant	synonymous variant	Likely benign	Jul 30, 2023	criteria provided, single submitter
NM_002074.5(GNB1):c.741C>T (p.Asp247=)	GNB1		not provided	VCV000731032	1	1720667	1	1789228	731032	731894	rs78079274	NC_000001.11:1789227:G:A	single nucleotide variant	synonymous variant	Likely benign	Dec 25, 2023	criteria provided, single submitter
NM_002074.5(GNB1):c.738C>T (p.Asp246=)	GNB1		not provided	VCV000787611	1	1720670	1	1789231	787611	706897	rs79516120	NC_000001.11:1789230:G:A	single nucleotide variant	synonymous variant	Benign/Likely benign	Nov 1, 2024	criteria provided, multiple submitters, no conflicts
NM_002074.5(GNB1):c.720A>G (p.Ala240=)	GNB1		not provided	VCV000711748	1	1720688	1	1789249	711748	718408	rs770626884	NC_000001.11:1789248:T:C	single nucleotide variant	synonymous variant	Likely benign	Jan 11, 2024	criteria provided, single submitter
NM_002074.5(GNB1):c.705T>C (p.Phe235=)	GNB1		not provided	VCV000764288	1	1720703	1	1789264	764288	761345	rs753314529	NC_000001.11:1789263:A:G	single nucleotide variant	synonymous variant	Likely benign	Jan 14, 2024	criteria provided, multiple submitters, no conflicts
NM_002074.5(GNB1):c.687C>T (p.Ile229=)	GNB1		not provided	VCV001658836	1	1721846	1	1790407	1658836	1640381	rs2100502789	NC_000001.11:1790406:G:A	single nucleotide variant	synonymous variant	Likely benign	Jul 16, 2021	criteria provided, single submitter
NM_002074.5(GNB1):c.684C>T (p.Asp228=)	GNB1		not provided	VCV003014480	1	1721849	1	1790410	3014480	3170916		NC_000001.11:1790409:G:A	single nucleotide variant	synonymous variant	Likely benign	Nov 12, 2023	criteria provided, single submitter
NM_002074.5(GNB1):c.675C>T (p.His225=)	GNB1		not provided	VCV001627158	1	1721858	1	1790419	1627158	1616183	rs758356105	NC_000001.11:1790418:G:A	single nucleotide variant	synonymous variant	Likely benign	Jul 14, 2021	criteria provided, single submitter
NM_002074.5(GNB1):c.666C>T (p.Phe222=)	GNB1		not provided	VCV001568852	1	1721867	1	1790428	1568852	1634453	rs2100502987	NC_000001.11:1790427:G:A	single nucleotide variant	synonymous variant	Likely benign	Oct 13, 2022	criteria provided, single submitter
NM_002074.5(GNB1):c.663C>T (p.Thr221=)	GNB1		not provided	VCV002981094	1	1721870	1	1790431	2981094	3138392		NC_000001.11:1790430:G:A	single nucleotide variant	synonymous variant	Likely benign	Jun 23, 2023	criteria provided, single submitter
NM_002074.5(GNB1):c.603T>C (p.Ser201=)	GNB1		not provided	VCV001951573	1	1721930	1	1790491	1951573	2014301		NC_000001.11:1790490:A:G	single nucleotide variant	synonymous variant	Likely benign	Aug 3, 2022	criteria provided, single submitter
NM_002074.5(GNB1):c.597C>T (p.Phe199=)	GNB1		not provided	VCV001669565	1	1721936	1	1790497	1669565	1665819	rs538188811	NC_000001.11:1790496:G:A	single nucleotide variant	synonymous variant	Likely benign	Nov 6, 2023	criteria provided, single submitter
NM_002074.5(GNB1):c.594G>C (p.Leu198=)	GNB1		not provided	VCV002754518	1	1721939	1	1790500	2754518	2913959		NC_000001.11:1790499:C:G	single nucleotide variant	synonymous variant	Likely benign	Aug 23, 2023	criteria provided, single submitter
NM_002074.5(GNB1):c.582T>C (p.Pro194=)	GNB1		not provided	VCV000806037	1	1721951	1	1790512	806037	794502	rs1304248028	NC_000001.11:1790511:A:G	single nucleotide variant	synonymous variant	Likely benign	Apr 1, 2018	criteria provided, single submitter
NM_002074.5(GNB1):c.579T>C (p.Ala193=)	GNB1		not provided	VCV001940725	1	1721954	1	1790515	1940725	2004759		NC_000001.11:1790514:A:G	single nucleotide variant	synonymous variant	Likely benign	Dec 2, 2022	criteria provided, single submitter
NM_002074.5(GNB1):c.576T>C (p.Leu192=)	GNB1		not provided	VCV001647750	1	1721957	1	1790518	1647750	1566478	rs1356699612	NC_000001.11:1790517:A:G	single nucleotide variant	synonymous variant	Likely benign	Oct 12, 2021	criteria provided, single submitter
NM_002074.5(GNB1):c.543C>T (p.Thr181=)	GNB1		not provided	VCV001638964	1	1721990	1	1790551	1638964	1525693	rs768039402	NC_000001.11:1790550:G:A	single nucleotide variant	synonymous variant	Likely benign	Sep 1, 2024	criteria provided, multiple submitters, no conflicts
NM_002074.5(GNB1):c.534C>T (p.Thr178=)	GNB1		not provided	VCV002126433	1	1721999	1	1790560	2126433	2181733		NC_000001.11:1790559:G:A	single nucleotide variant	synonymous variant	Likely benign	Apr 15, 2022	criteria provided, single submitter
NM_002074.5(GNB1):c.519C>T (p.Thr173=)	GNB1		not provided	VCV001407207	1	1722014	1	1790575	1407207	1483416	rs374082962	NC_000001.11:1790574:G:A	single nucleotide variant	synonymous variant	Likely benign	Aug 10, 2023	criteria provided, multiple submitters, no conflicts
NM_002074.5(GNB1):c.513C>T (p.Ile171=)	GNB1		not provided	VCV001968513	1	1722020	1	1790581	1968513	2028521		NC_000001.11:1790580:G:A	single nucleotide variant	synonymous variant	Likely benign	Jan 26, 2022	criteria provided, single submitter
NM_002074.5(GNB1):c.510C>T (p.Asp170=)	GNB1		not provided	VCV001608216	1	1722023	1	1790584	1608216	1539655	rs186894090	NC_000001.11:1790583:G:A	single nucleotide variant	synonymous variant	Likely benign	Oct 5, 2022	criteria provided, single submitter
NM_002074.5(GNB1):c.495G>A (p.Thr165=)	GNB1		not provided	VCV000740983	1	1724686	1	1793247	740983	745856	rs143709588	NC_000001.11:1793246:C:T	single nucleotide variant	synonymous variant	Benign/Likely benign	Nov 1, 2024	criteria provided, multiple submitters, no conflicts
NM_002074.5(GNB1):c.492C>T (p.Thr164=)	GNB1		not provided	VCV002847983	1	1724689	1	1793250	2847983	3005226		NC_000001.11:1793249:G:A	single nucleotide variant	synonymous variant	Likely benign	Jul 25, 2023	criteria provided, single submitter
NM_002074.5(GNB1):c.489C>T (p.Asp163=)	GNB1		not provided	VCV001550059	1	1724692	1	1793253	1550059	1658995	rs1373042068	NC_000001.11:1793252:G:A	single nucleotide variant	synonymous variant	Likely benign	Jan 12, 2023	criteria provided, multiple submitters, no conflicts
NM_002074.5(GNB1):c.474C>T (p.Val158=)	GNB1		not provided	VCV002103639	1	1724707	1	1793268	2103639	2169289		NC_000001.11:1793267:G:A	single nucleotide variant	synonymous variant	Likely benign	Mar 4, 2022	criteria provided, single submitter
NM_002074.5(GNB1):c.471C>T (p.Ile157=)	GNB1		not provided	VCV002819396	1	1724710	1	1793271	2819396	2987751		NC_000001.11:1793270:G:A	single nucleotide variant	synonymous variant	Likely benign	Jan 8, 2024	criteria provided, single submitter
NM_002074.5(GNB1):c.471C>A (p.Ile157=)	GNB1		not provided	VCV001570690	1	1724710	1	1793271	1570690	1537185	rs747239027	NC_000001.11:1793270:G:T	single nucleotide variant	synonymous variant	Likely benign	Jul 1, 2023	criteria provided, multiple submitters, no conflicts
NM_002074.5(GNB1):c.462C>T (p.Asp154=)	GNB1		Acute lymphoid leukemia|Intellectual disability, autosomal dominant 42|Myelodysplastic syndrome|not provided	VCV000775489	1	1724719	1	1793280	775489	696292	rs77027087	NC_000001.11:1793279:G:A	single nucleotide variant	synonymous variant	Benign/Likely benign	Feb 1, 2024	criteria provided, multiple submitters, no conflicts
NM_002074.5(GNB1):c.438G>A (p.Leu146=)	GNB1		not provided	VCV002856421	1	1724743	1	1793304	2856421	3007673		NC_000001.11:1793303:C:T	single nucleotide variant	synonymous variant	Likely benign	Apr 15, 2023	criteria provided, single submitter
NM_002074.5(GNB1):c.426C>T (p.His142=)	GNB1		not provided	VCV002088130	1	1735862	1	1804423	2088130	2155088		NC_000001.11:1804422:G:A	single nucleotide variant	synonymous variant	Likely benign	Jan 19, 2022	criteria provided, single submitter
NM_002074.5(GNB1):c.402C>T (p.Arg134=)	GNB1		Intellectual disability, autosomal dominant 42|Acute lymphoid leukemia|Myelodysplastic syndrome|not provided	VCV001562666	1	1735886	1	1804447	1562666	1643077	rs560214051	NC_000001.11:1804446:G:A	single nucleotide variant	synonymous variant	Likely benign	Nov 18, 2023	criteria provided, multiple submitters, no conflicts
NM_002074.5(GNB1):c.399G>A (p.Val133=)	GNB1		not provided	VCV001944078	1	1735889	1	1804450	1944078	2005516		NC_000001.11:1804449:C:T	single nucleotide variant	synonymous variant	Likely benign	Oct 10, 2023	criteria provided, single submitter
NM_002074.5(GNB1):c.396C>T (p.Asn132=)	GNB1		not provided	VCV002070804	1	1735892	1	1804453	2070804	2130028		NC_000001.11:1804452:G:A	single nucleotide variant	synonymous variant	Likely benign	Nov 27, 2023	criteria provided, single submitter
NM_002074.5(GNB1):c.366C>T (p.Ser122=)	GNB1		not provided	VCV002746873	1	1735922	1	1804483	2746873	2897748		NC_000001.11:1804482:G:A	single nucleotide variant	synonymous variant	Likely benign	Nov 27, 2023	criteria provided, single submitter
NM_002074.5(GNB1):c.342C>T (p.Cys114=)	GNB1		not provided	VCV001547404	1	1735946	1	1804507	1547404	1571947	rs556077872	NC_000001.11:1804506:G:A	single nucleotide variant	synonymous variant	Likely benign	Jan 2, 2024	criteria provided, multiple submitters, no conflicts
NM_002074.5(GNB1):c.339C>T (p.Ala113=)	GNB1		not provided	VCV002962194	1	1735949	1	1804510	2962194	3126906		NC_000001.11:1804509:G:A	single nucleotide variant	synonymous variant	Likely benign	Dec 2, 2023	criteria provided, single submitter
NM_002074.5(GNB1):c.336G>A (p.Val112=)	GNB1		not provided	VCV002110807	1	1735952	1	1804513	2110807	2167376		NC_000001.11:1804512:C:T	single nucleotide variant	synonymous variant	Likely benign	Mar 13, 2022	criteria provided, single submitter
NM_002074.5(GNB1):c.330C>T (p.Asn110=)	GNB1		not provided	VCV001630042	1	1735958	1	1804519	1630042	1596564	rs1214363276	NC_000001.11:1804518:G:A	single nucleotide variant	synonymous variant	Likely benign	Apr 9, 2023	criteria provided, single submitter
NM_002074.5(GNB1):c.318C>G (p.Ala106=)	GNB1		not provided	VCV001551681	1	1735970	1	1804531	1551681	1551460	rs768790682	NC_000001.11:1804530:G:C	single nucleotide variant	synonymous variant	Likely benign	Jul 19, 2022	criteria provided, single submitter
NM_002074.5(GNB1):c.255C>T (p.Tyr85=)	GNB1		not provided	VCV002778431	1	1737926	1	1806487	2778431	2946923		NC_000001.11:1806486:G:A	single nucleotide variant	synonymous variant|5 prime UTR variant	Likely benign	Aug 28, 2023	criteria provided, single submitter
NM_002074.5(GNB1):c.180C>T (p.Ala60=)	GNB1		not provided	VCV002126470	1	1747218	1	1815779	2126470	2181770		NC_000001.11:1815778:G:A	single nucleotide variant	synonymous variant|intron variant	Likely benign	Apr 15, 2022	criteria provided, single submitter
NM_002074.5(GNB1):c.177C>T (p.Tyr59=)	GNB1		not provided	VCV000745763	1	1747221	1	1815782	745763	745876	rs144473385	NC_000001.11:1815781:G:A	single nucleotide variant	synonymous variant|intron variant	Likely benign	Mar 1, 2024	criteria provided, multiple submitters, no conflicts
NM_002074.5(GNB1):c.168C>T (p.Ala56=)	GNB1		not provided	VCV002971567	1	1747230	1	1815791	2971567	3129360		NC_000001.11:1815790:G:A	single nucleotide variant	synonymous variant|intron variant	Likely benign	Sep 20, 2023	criteria provided, single submitter
NM_002074.5(GNB1):c.168C>G (p.Ala56=)	GNB1		not provided	VCV002957549	1	1747230	1	1815791	2957549	3122647		NC_000001.11:1815790:G:C	single nucleotide variant	synonymous variant|intron variant	Likely benign	Oct 12, 2023	criteria provided, single submitter
NM_002074.5(GNB1):c.159G>T (p.Gly53=)	GNB1		not provided	VCV003009089	1	1747239	1	1815800	3009089	3159095		NC_000001.11:1815799:C:A	single nucleotide variant	synonymous variant|intron variant	Likely benign	Jan 3, 2024	criteria provided, single submitter
NM_002074.5(GNB1):c.159G>A (p.Gly53=)	GNB1		not provided	VCV002856955	1	1747239	1	1815800	2856955	3014176		NC_000001.11:1815799:C:T	single nucleotide variant	synonymous variant|intron variant	Likely benign	Apr 16, 2023	criteria provided, single submitter
NM_002074.5(GNB1):c.151C>T (p.Leu51=)	GNB1		not provided	VCV002028296	1	1747247	1	1815808	2028296	2088771		NC_000001.11:1815807:G:A	single nucleotide variant	synonymous variant|intron variant	Likely benign	Sep 16, 2022	criteria provided, single submitter
NM_002074.5(GNB1):c.150A>C (p.Thr50=)	GNB1		not provided	VCV001566282	1	1747248	1	1815809	1566282	1656220	rs766335096	NC_000001.11:1815808:T:G	single nucleotide variant	synonymous variant|intron variant	Likely benign	Dec 11, 2023	criteria provided, single submitter
NM_002074.5(GNB1):c.141G>T (p.Thr47=)	GNB1		not provided	VCV001590049	1	1747257	1	1815818	1590049	1576595	rs200359185	NC_000001.11:1815817:C:A	single nucleotide variant	synonymous variant|intron variant	Likely benign	Jun 13, 2022	criteria provided, single submitter
NM_002074.5(GNB1):c.141G>A (p.Thr47=)	GNB1		not provided	VCV000730077	1	1747257	1	1815818	730077	731903	rs200359185	NC_000001.11:1815817:C:T	single nucleotide variant	synonymous variant|intron variant	Benign	Dec 6, 2023	criteria provided, single submitter
NM_002074.5(GNB1):c.111C>T (p.Ile37=)	GNB1		not provided	VCV002188291	1	1747287	1	1815848	2188291	1918335		NC_000001.11:1815847:G:A	single nucleotide variant	synonymous variant|intron variant	Likely benign	Sep 13, 2022	criteria provided, single submitter
NM_002074.5(GNB1):c.78A>G (p.Ala26=)	GNB1		not provided	VCV002728824	1	1749294	1	1817855	2728824	2882850		NC_000001.11:1817854:T:C	single nucleotide variant	synonymous variant|intron variant	Likely benign	Oct 28, 2023	criteria provided, single submitter
NM_002074.5(GNB1):c.72A>G (p.Ala24=)	GNB1		not provided	VCV002985642	1	1749300	1	1817861	2985642	3153704		NC_000001.11:1817860:T:C	single nucleotide variant	synonymous variant|intron variant	Likely benign	Mar 25, 2023	criteria provided, single submitter
NM_002074.5(GNB1):c.60C>T (p.Asp20=)	GNB1		not provided|See cases	VCV000763272	1	1749312	1	1817873	763272	761362	rs137888936	NC_000001.11:1817872:G:A	single nucleotide variant	synonymous variant|intron variant	Likely benign	Dec 12, 2023	criteria provided, multiple submitters, no conflicts
