# Supplementary material for: Dosage effect of Copy Number Variation in Epilepsy and ten regions of the human brain
Source: Research Square preprint supplement (doi:10.21203/rs.3.rs-6130694/v1), 2025-04-15
Supplement: Supplementary file 2 [file 7652c5937351c1d5fdcfa3db.xlsx]

## Sheet: SANAD
Supplementary table 4. Association results for the WWOX gene. Association results for the drug-response phenotype in SANAD for CNV genotypes and LRR using univariate and multivariate models.
Association mode	Chrom	location	phenotype	MAF	Beta	Pval	Gene	Consequence
SANAD_LRR_Joint_model	chr16	78141264	drug_response	-0.00309	0.00555	0.637	WWOX	intron_variant;intron_variant,non_coding_transcript_variant;intron_variant,NMD_transcript_variant
SANAD_LRR_univariate	chr16	78141264	drug_response	-0.00309	0.803	0.395	WWOX	intron_variant;intron_variant,NMD_transcript_variant;intron_variant,non_coding_transcript_variant
SANAD_LRR_Joint_model	chr16	78143607	drug_response	0.00658	-0.00305	0.846	WWOX	intron_variant;intron_variant,non_coding_transcript_variant;intron_variant,NMD_transcript_variant
SANAD_LRR_univariate	chr16	78143607	drug_response	0.00658	0.00877	0.989	WWOX	intron_variant;intron_variant,NMD_transcript_variant;intron_variant,non_coding_transcript_variant
SANAD_LRR_Joint_model	chr16	78151746	drug_response	0.0283	-0.0086	0.638	WWOX	intron_variant;intron_variant,non_coding_transcript_variant;intron_variant,NMD_transcript_variant
SANAD_LRR_univariate	chr16	78151746	drug_response	0.0283	0.212	0.726	WWOX	intron_variant;intron_variant,NMD_transcript_variant;intron_variant,non_coding_transcript_variant
SANAD_LRR_Joint_model	chr16	78158355	drug_response	-0.00118	-0.016	0.428	WWOX	intron_variant;intron_variant,non_coding_transcript_variant;intron_variant,NMD_transcript_variant
SANAD_LRR_univariate	chr16	78158355	drug_response	-0.00118	-1.18	0.0634	WWOX	intron_variant;intron_variant,NMD_transcript_variant;intron_variant,non_coding_transcript_variant
SANAD_LRR_Joint_model	chr16	78159032	drug_response	-0.00941	-0.011	0.468	WWOX	intron_variant;intron_variant,non_coding_transcript_variant;intron_variant,NMD_transcript_variant;upstream_gene_variant
SANAD_LRR_univariate	chr16	78159032	drug_response	-0.00941	-0.43	0.6	WWOX	intron_variant;intron_variant,NMD_transcript_variant;upstream_gene_variant;intron_variant,non_coding_transcript_variant
SANAD_LRR_Joint_model	chr16	78160462	drug_response	-0.0282	-0.00717	0.675	WWOX	intron_variant;intron_variant,non_coding_transcript_variant;intron_variant,NMD_transcript_variant;upstream_gene_variant
SANAD_LRR_univariate	chr16	78160462	drug_response	-0.0282	-0.461	0.47	WWOX	intron_variant;intron_variant,NMD_transcript_variant;upstream_gene_variant;intron_variant,non_coding_transcript_variant
SANAD_LRR_Joint_model	chr16	78163254	drug_response	0.00242	-0.00894	0.479	WWOX	intron_variant;intron_variant,non_coding_transcript_variant;intron_variant,NMD_transcript_variant;upstream_gene_variant
SANAD_LRR_univariate	chr16	78163254	drug_response	0.00242	-1.43	0.16	WWOX	intron_variant;intron_variant,NMD_transcript_variant;upstream_gene_variant;intron_variant,non_coding_transcript_variant
SANAD_LRR_Joint_model	chr16	78164235	drug_response	0.0098	0.00261	0.81	WWOX	intron_variant;intron_variant,non_coding_transcript_variant;intron_variant,NMD_transcript_variant
SANAD_LRR_univariate	chr16	78164235	drug_response	0.0098	0.239	0.803	WWOX	intron_variant;intron_variant,NMD_transcript_variant;intron_variant,non_coding_transcript_variant
SANAD_LRR_Joint_model	chr16	78164805	drug_response	0.0107	0.00012	0.99	WWOX	intron_variant;intron_variant,non_coding_transcript_variant;intron_variant,NMD_transcript_variant
SANAD_LRR_univariate	chr16	78164805	drug_response	0.0107	-0.111	0.914	WWOX	intron_variant;intron_variant,NMD_transcript_variant;intron_variant,non_coding_transcript_variant
SANAD_LRR_Joint_model	chr16	78170258	drug_response	-0.00985	-0.0161	0.369	WWOX	intron_variant;intron_variant,non_coding_transcript_variant;intron_variant,NMD_transcript_variant
SANAD_LRR_univariate	chr16	78170258	drug_response	-0.00985	-0.918	0.233	WWOX	intron_variant;intron_variant,NMD_transcript_variant;intron_variant,non_coding_transcript_variant
SANAD_LRR_Joint_model	chr16	78171308	drug_response	0.0203	-0.0143	0.433	WWOX	intron_variant;intron_variant,non_coding_transcript_variant;intron_variant,NMD_transcript_variant
SANAD_LRR_univariate	chr16	78171308	drug_response	0.0203	-0.628	0.37	WWOX	intron_variant;intron_variant,NMD_transcript_variant;intron_variant,non_coding_transcript_variant
SANAD_LRR_Joint_model	chr16	78171686	drug_response	-0.00264	-0.00516	0.831	WWOX	intron_variant;intron_variant,non_coding_transcript_variant;intron_variant,NMD_transcript_variant
SANAD_LRR_univariate	chr16	78171686	drug_response	-0.00264	0.135	0.752	WWOX	intron_variant;intron_variant,NMD_transcript_variant;intron_variant,non_coding_transcript_variant
SANAD_LRR_Joint_model	chr16	78171739	drug_response	-0.0067	-0.00944	0.686	WWOX	intron_variant;intron_variant,non_coding_transcript_variant;intron_variant,NMD_transcript_variant
SANAD_LRR_univariate	chr16	78171739	drug_response	-0.0067	-0.0611	0.895	WWOX	intron_variant;intron_variant,NMD_transcript_variant;intron_variant,non_coding_transcript_variant
SANAD_LRR_Joint_model	chr16	78171819	drug_response	-0.00739	0.00248	0.905	WWOX	intron_variant;intron_variant,non_coding_transcript_variant;intron_variant,NMD_transcript_variant
SANAD_LRR_univariate	chr16	78171819	drug_response	-0.00739	0.0579	0.907	WWOX	intron_variant;intron_variant,NMD_transcript_variant;intron_variant,non_coding_transcript_variant
SANAD_LRR_Joint_model	chr16	78171870	drug_response	-0.0111	-0.00581	0.765	WWOX	intron_variant;intron_variant,non_coding_transcript_variant;intron_variant,NMD_transcript_variant
SANAD_LRR_univariate	chr16	78171870	drug_response	-0.0111	0.117	0.828	WWOX	intron_variant;intron_variant,NMD_transcript_variant;intron_variant,non_coding_transcript_variant
SANAD_LRR_Joint_model	chr16	78171921	drug_response	-0.00687	0.000699	0.972	WWOX	intron_variant;intron_variant,non_coding_transcript_variant;intron_variant,NMD_transcript_variant
SANAD_LRR_univariate	chr16	78171921	drug_response	-0.00687	-0.0816	0.871	WWOX	intron_variant;intron_variant,NMD_transcript_variant;intron_variant,non_coding_transcript_variant
SANAD_LRR_Joint_model	chr16	78171974	drug_response	-0.00364	-0.0138	0.569	WWOX	intron_variant;intron_variant,non_coding_transcript_variant;intron_variant,NMD_transcript_variant
SANAD_LRR_univariate	chr16	78171974	drug_response	-0.00364	-0.517	0.271	WWOX	intron_variant;intron_variant,NMD_transcript_variant;intron_variant,non_coding_transcript_variant
SANAD_LRR_Joint_model	chr16	78172025	drug_response	-0.00832	0.0104	0.566	WWOX	intron_variant;intron_variant,non_coding_transcript_variant;intron_variant,NMD_transcript_variant
SANAD_LRR_univariate	chr16	78172025	drug_response	-0.00832	0.232	0.716	WWOX	intron_variant;intron_variant,NMD_transcript_variant;intron_variant,non_coding_transcript_variant
SANAD_LRR_Joint_model	chr16	78172076	drug_response	-0.00961	0.00586	0.74	WWOX	intron_variant;intron_variant,non_coding_transcript_variant;intron_variant,NMD_transcript_variant
SANAD_LRR_univariate	chr16	78172076	drug_response	-0.00961	0.128	0.832	WWOX	intron_variant;intron_variant,NMD_transcript_variant;intron_variant,non_coding_transcript_variant
SANAD_LRR_Joint_model	chr16	78172098	drug_response	0.00402	0.0153	0.574	WWOX	intron_variant;intron_variant,non_coding_transcript_variant;intron_variant,NMD_transcript_variant
SANAD_LRR_univariate	chr16	78172098	drug_response	0.00402	0.383	0.366	WWOX	intron_variant;intron_variant,NMD_transcript_variant;intron_variant,non_coding_transcript_variant
SANAD_LRR_Joint_model	chr16	78172174	drug_response	-0.0133	0.0132	0.69	WWOX	intron_variant;intron_variant,non_coding_transcript_variant;intron_variant,NMD_transcript_variant
SANAD_LRR_univariate	chr16	78172174	drug_response	-0.0133	-0.0301	0.927	WWOX	intron_variant;intron_variant,NMD_transcript_variant;intron_variant,non_coding_transcript_variant
SANAD_LRR_Joint_model	chr16	78172252	drug_response	-0.0287	3.02e-05	0.999	WWOX	intron_variant;intron_variant,non_coding_transcript_variant;intron_variant,NMD_transcript_variant
SANAD_LRR_univariate	chr16	78172252	drug_response	-0.0287	-0.0941	0.772	WWOX	intron_variant;intron_variant,NMD_transcript_variant;intron_variant,non_coding_transcript_variant
SANAD_LRR_Joint_model	chr16	78174052	drug_response	0.00159	-0.00335	0.792	WWOX	intron_variant;intron_variant,non_coding_transcript_variant;intron_variant,NMD_transcript_variant
SANAD_LRR_univariate	chr16	78174052	drug_response	0.00159	-0.668	0.416	WWOX	intron_variant;intron_variant,NMD_transcript_variant;intron_variant,non_coding_transcript_variant
SANAD_LRR_Joint_model	chr16	78180765	drug_response	0.0111	-0.0184	0.292	WWOX	intron_variant;intron_variant,non_coding_transcript_variant;intron_variant,NMD_transcript_variant
SANAD_LRR_univariate	chr16	78180765	drug_response	0.0111	-1.32	0.143	WWOX	intron_variant;intron_variant,NMD_transcript_variant;intron_variant,non_coding_transcript_variant
SANAD_LRR_Joint_model	chr16	78181986	drug_response	-0.00664	-0.00614	0.6	WWOX	intron_variant;intron_variant,non_coding_transcript_variant;intron_variant,NMD_transcript_variant
SANAD_LRR_univariate	chr16	78181986	drug_response	-0.00664	-0.553	0.564	WWOX	intron_variant;intron_variant,NMD_transcript_variant;intron_variant,non_coding_transcript_variant
SANAD_LRR_Joint_model	chr16	78183726	drug_response	-0.000428	0.00807	0.541	WWOX	intron_variant;intron_variant,non_coding_transcript_variant;intron_variant,NMD_transcript_variant
SANAD_LRR_univariate	chr16	78183726	drug_response	-0.000428	0.88	0.322	WWOX	intron_variant;intron_variant,NMD_transcript_variant;intron_variant,non_coding_transcript_variant
SANAD_LRR_Joint_model	chr16	78183814	drug_response	0.00549	-0.00772	0.591	WWOX	intron_variant;intron_variant,non_coding_transcript_variant;intron_variant,NMD_transcript_variant
SANAD_LRR_univariate	chr16	78183814	drug_response	0.00549	-0.992	0.209	WWOX	intron_variant;intron_variant,NMD_transcript_variant;intron_variant,non_coding_transcript_variant
SANAD_LRR_Joint_model	chr16	78187054	drug_response	0.00553	-0.0151	0.448	WWOX	intron_variant;intron_variant,non_coding_transcript_variant;intron_variant,NMD_transcript_variant
SANAD_LRR_univariate	chr16	78187054	drug_response	0.00553	-0.137	0.829	WWOX	intron_variant;intron_variant,NMD_transcript_variant;intron_variant,non_coding_transcript_variant
SANAD_LRR_Joint_model	chr16	78187380	drug_response	0.00623	-0.00104	0.941	WWOX	intron_variant;intron_variant,non_coding_transcript_variant;intron_variant,NMD_transcript_variant
SANAD_LRR_univariate	chr16	78187380	drug_response	0.00623	-0.331	0.646	WWOX	intron_variant;intron_variant,NMD_transcript_variant;intron_variant,non_coding_transcript_variant
SANAD_LRR_Joint_model	chr16	78188800	drug_response	0.00531	0.0166	0.328	WWOX	intron_variant;intron_variant,non_coding_transcript_variant;intron_variant,NMD_transcript_variant
SANAD_LRR_univariate	chr16	78188800	drug_response	0.00531	1.2	0.162	WWOX	intron_variant;intron_variant,NMD_transcript_variant;intron_variant,non_coding_transcript_variant
SANAD_LRR_Joint_model	chr16	78190218	drug_response	-0.0133	-0.00107	0.953	WWOX	intron_variant;intron_variant,non_coding_transcript_variant;intron_variant,NMD_transcript_variant
SANAD_LRR_univariate	chr16	78190218	drug_response	-0.0133	-0.0423	0.941	WWOX	intron_variant;intron_variant,NMD_transcript_variant;intron_variant,non_coding_transcript_variant
SANAD_LRR_Joint_model	chr16	78191770	drug_response	0.0196	0.00492	0.723	WWOX	intron_variant;intron_variant,non_coding_transcript_variant;intron_variant,NMD_transcript_variant
SANAD_LRR_univariate	chr16	78191770	drug_response	0.0196	0.959	0.214	WWOX	intron_variant;intron_variant,NMD_transcript_variant;intron_variant,non_coding_transcript_variant
SANAD_LRR_Joint_model	chr16	78200278	drug_response	-0.00496	-0.0131	0.434	WWOX	intron_variant;intron_variant,non_coding_transcript_variant;intron_variant,NMD_transcript_variant
SANAD_LRR_univariate	chr16	78200278	drug_response	-0.00496	-1.17	0.13	WWOX	intron_variant;intron_variant,NMD_transcript_variant;intron_variant,non_coding_transcript_variant
SANAD_LRR_Joint_model	chr16	78201753	drug_response	0.00752	-0.00378	0.759	WWOX	intron_variant;intron_variant,non_coding_transcript_variant;intron_variant,NMD_transcript_variant
SANAD_LRR_univariate	chr16	78201753	drug_response	0.00752	-0.266	0.757	WWOX	intron_variant;intron_variant,NMD_transcript_variant;intron_variant,non_coding_transcript_variant
SANAD_LRR_Joint_model	chr16	78201953	drug_response	0.0102	-0.015	0.358	WWOX	intron_variant;intron_variant,non_coding_transcript_variant;intron_variant,NMD_transcript_variant
SANAD_LRR_univariate	chr16	78201953	drug_response	0.0102	-0.604	0.481	WWOX	intron_variant;intron_variant,NMD_transcript_variant;intron_variant,non_coding_transcript_variant
SANAD_LRR_Joint_model	chr16	78204334	drug_response	-0.00871	0.00681	0.61	WWOX	intron_variant;intron_variant,non_coding_transcript_variant;intron_variant,NMD_transcript_variant
SANAD_LRR_univariate	chr16	78204334	drug_response	-0.00871	0.324	0.699	WWOX	intron_variant;intron_variant,NMD_transcript_variant;intron_variant,non_coding_transcript_variant
SANAD_LRR_Joint_model	chr16	78205175	drug_response	-0.0057	-0.00623	0.688	WWOX	intron_variant;intron_variant,non_coding_transcript_variant;intron_variant,NMD_transcript_variant
SANAD_LRR_univariate	chr16	78205175	drug_response	-0.0057	-0.129	0.853	WWOX	intron_variant;intron_variant,NMD_transcript_variant;intron_variant,non_coding_transcript_variant
SANAD_LRR_Joint_model	chr16	78205562	drug_response	-0.0152	0.0111	0.515	WWOX	intron_variant;intron_variant,non_coding_transcript_variant;intron_variant,NMD_transcript_variant
SANAD_LRR_univariate	chr16	78205562	drug_response	-0.0152	0.081	0.908	WWOX	intron_variant;intron_variant,NMD_transcript_variant;intron_variant,non_coding_transcript_variant
SANAD_LRR_Joint_model	chr16	78206556	drug_response	0.0039	0.00413	0.745	WWOX	intron_variant;intron_variant,non_coding_transcript_variant;intron_variant,NMD_transcript_variant
SANAD_LRR_univariate	chr16	78206556	drug_response	0.0039	0.194	0.815	WWOX	intron_variant;intron_variant,NMD_transcript_variant;intron_variant,non_coding_transcript_variant
SANAD_LRR_Joint_model	chr16	78206954	drug_response	0.00302	0.00518	0.733	WWOX	intron_variant;intron_variant,non_coding_transcript_variant;intron_variant,NMD_transcript_variant
SANAD_LRR_univariate	chr16	78206954	drug_response	0.00302	0.566	0.418	WWOX	intron_variant;intron_variant,NMD_transcript_variant;intron_variant,non_coding_transcript_variant
SANAD_LRR_Joint_model	chr16	78210351	drug_response	0.0019	0.011	0.519	WWOX	intron_variant;intron_variant,non_coding_transcript_variant;intron_variant,NMD_transcript_variant
SANAD_LRR_univariate	chr16	78210351	drug_response	0.0019	0.826	0.235	WWOX	intron_variant;intron_variant,NMD_transcript_variant;intron_variant,non_coding_transcript_variant
SANAD_LRR_Joint_model	chr16	78211766	drug_response	0.00713	-0.00922	0.574	WWOX	intron_variant;intron_variant,non_coding_transcript_variant;intron_variant,NMD_transcript_variant
SANAD_LRR_univariate	chr16	78211766	drug_response	0.00713	-0.7	0.312	WWOX	intron_variant;intron_variant,NMD_transcript_variant;intron_variant,non_coding_transcript_variant
SANAD_LRR_Joint_model	chr16	78213755	drug_response	0.00719	0.000971	0.929	WWOX	intron_variant;intron_variant,non_coding_transcript_variant;intron_variant,NMD_transcript_variant
SANAD_LRR_univariate	chr16	78213755	drug_response	0.00719	-0.0373	0.968	WWOX	intron_variant;intron_variant,NMD_transcript_variant;intron_variant,non_coding_transcript_variant
SANAD_LRR_Joint_model	chr16	78214952	drug_response	0.00828	-0.0146	0.388	WWOX	intron_variant;intron_variant,non_coding_transcript_variant;intron_variant,NMD_transcript_variant
SANAD_LRR_univariate	chr16	78214952	drug_response	0.00828	-0.662	0.403	WWOX	intron_variant;intron_variant,NMD_transcript_variant;intron_variant,non_coding_transcript_variant
SANAD_LRR_Joint_model	chr16	78215909	drug_response	0.00482	-0.00137	0.887	WWOX	intron_variant;intron_variant,non_coding_transcript_variant;intron_variant,NMD_transcript_variant
SANAD_LRR_univariate	chr16	78215909	drug_response	0.00482	0.0453	0.966	WWOX	intron_variant;intron_variant,NMD_transcript_variant;intron_variant,non_coding_transcript_variant
SANAD_LRR_Joint_model	chr16	78216167	drug_response	0.027	-0.0239	0.474	WWOX	intron_variant;intron_variant,non_coding_transcript_variant;intron_variant,NMD_transcript_variant
SANAD_LRR_univariate	chr16	78216167	drug_response	0.027	-0.311	0.398	WWOX	intron_variant;intron_variant,NMD_transcript_variant;intron_variant,non_coding_transcript_variant
SANAD_LRR_Joint_model	chr16	78221718	drug_response	-0.00387	0.0106	0.523	WWOX	intron_variant;intron_variant,non_coding_transcript_variant;intron_variant,NMD_transcript_variant
SANAD_LRR_univariate	chr16	78221718	drug_response	-0.00387	0.267	0.71	WWOX	intron_variant;intron_variant,NMD_transcript_variant;intron_variant,non_coding_transcript_variant
SANAD_LRR_Joint_model	chr16	78222527	drug_response	-0.0253	0.0102	0.532	WWOX	intron_variant;intron_variant,non_coding_transcript_variant;intron_variant,NMD_transcript_variant
SANAD_LRR_univariate	chr16	78222527	drug_response	-0.0253	0.269	0.708	WWOX	intron_variant;intron_variant,NMD_transcript_variant;intron_variant,non_coding_transcript_variant
SANAD_LRR_Joint_model	chr16	78222989	drug_response	0.000815	-0.000791	0.947	WWOX	intron_variant;intron_variant,non_coding_transcript_variant;intron_variant,NMD_transcript_variant
SANAD_LRR_univariate	chr16	78222989	drug_response	0.000815	-0.107	0.9	WWOX	intron_variant;intron_variant,NMD_transcript_variant;intron_variant,non_coding_transcript_variant
SANAD_LRR_Joint_model	chr16	78224186	drug_response	0.00361	0.00893	0.525	WWOX	intron_variant;intron_variant,non_coding_transcript_variant;intron_variant,NMD_transcript_variant
SANAD_LRR_univariate	chr16	78224186	drug_response	0.00361	0.541	0.519	WWOX	intron_variant;intron_variant,NMD_transcript_variant;intron_variant,non_coding_transcript_variant
SANAD_LRR_Joint_model	chr16	78232385	drug_response	-0.00595	-0.00618	0.631	WWOX	intron_variant;intron_variant,non_coding_transcript_variant;intron_variant,NMD_transcript_variant
SANAD_LRR_univariate	chr16	78232385	drug_response	-0.00595	-0.931	0.292	WWOX	intron_variant;intron_variant,NMD_transcript_variant;intron_variant,non_coding_transcript_variant
SANAD_LRR_Joint_model	chr16	78236048	drug_response	-0.00617	-0.000768	0.958	WWOX	intron_variant;intron_variant,non_coding_transcript_variant;intron_variant,NMD_transcript_variant
SANAD_LRR_univariate	chr16	78236048	drug_response	-0.00617	-0.349	0.616	WWOX	intron_variant;intron_variant,NMD_transcript_variant;intron_variant,non_coding_transcript_variant
SANAD_LRR_Joint_model	chr16	78243384	drug_response	0.0102	0.000203	0.984	WWOX	intron_variant;intron_variant,non_coding_transcript_variant;intron_variant,NMD_transcript_variant
SANAD_LRR_univariate	chr16	78243384	drug_response	0.0102	0.505	0.613	WWOX	intron_variant;intron_variant,NMD_transcript_variant;intron_variant,non_coding_transcript_variant
SANAD_LRR_Joint_model	chr16	78250055	drug_response	-0.0096	-0.00894	0.559	WWOX	intron_variant;intron_variant,non_coding_transcript_variant;intron_variant,NMD_transcript_variant
SANAD_LRR_univariate	chr16	78250055	drug_response	-0.0096	-0.779	0.3	WWOX	intron_variant;intron_variant,NMD_transcript_variant;intron_variant,non_coding_transcript_variant
SANAD_LRR_Joint_model	chr16	78251616	drug_response	0.00314	0.0101	0.486	WWOX	intron_variant;intron_variant,non_coding_transcript_variant;intron_variant,NMD_transcript_variant
SANAD_LRR_univariate	chr16	78251616	drug_response	0.00314	0.813	0.329	WWOX	intron_variant;intron_variant,NMD_transcript_variant;intron_variant,non_coding_transcript_variant
SANAD_LRR_Joint_model	chr16	78254732	drug_response	-0.0358	0.0125	0.491	WWOX	intron_variant;intron_variant,non_coding_transcript_variant;intron_variant,NMD_transcript_variant
SANAD_LRR_univariate	chr16	78254732	drug_response	-0.0358	0.407	0.545	WWOX	intron_variant;intron_variant,NMD_transcript_variant;intron_variant,non_coding_transcript_variant
SANAD_LRR_Joint_model	chr16	78257808	drug_response	0.0138	-0.00284	0.828	WWOX	intron_variant;intron_variant,non_coding_transcript_variant;intron_variant,NMD_transcript_variant
SANAD_LRR_univariate	chr16	78257808	drug_response	0.0138	-0.306	0.699	WWOX	intron_variant;intron_variant,NMD_transcript_variant;intron_variant,non_coding_transcript_variant
SANAD_LRR_Joint_model	chr16	78264680	drug_response	-0.00179	-0.0071	0.561	WWOX	intron_variant;intron_variant,non_coding_transcript_variant;intron_variant,NMD_transcript_variant
SANAD_LRR_univariate	chr16	78264680	drug_response	-0.00179	-0.923	0.331	WWOX	intron_variant;intron_variant,NMD_transcript_variant;intron_variant,non_coding_transcript_variant
SANAD_LRR_Joint_model	chr16	78265423	drug_response	-0.00833	-0.00112	0.92	WWOX	intron_variant;intron_variant,non_coding_transcript_variant;intron_variant,NMD_transcript_variant
SANAD_LRR_univariate	chr16	78265423	drug_response	-0.00833	-0.157	0.863	WWOX	intron_variant;intron_variant,NMD_transcript_variant;intron_variant,non_coding_transcript_variant
SANAD_LRR_Joint_model	chr16	78270078	drug_response	-0.0117	0.0106	0.447	WWOX;RP11-190D6.2	intron_variant;downstream_gene_variant;intron_variant,non_coding_transcript_variant;intron_variant,NMD_transcript_variant
SANAD_LRR_univariate	chr16	78270078	drug_response	-0.0117	1.18	0.198	WWOX;RP11-190D6.2	intron_variant;downstream_gene_variant;intron_variant,NMD_transcript_variant;intron_variant,non_coding_transcript_variant
SANAD_LRR_Joint_model	chr16	78271066	drug_response	0.00702	-0.0104	0.428	WWOX;RP11-190D6.2	intron_variant;downstream_gene_variant;intron_variant,non_coding_transcript_variant;intron_variant,NMD_transcript_variant
SANAD_LRR_univariate	chr16	78271066	drug_response	0.00702	-1.54	0.117	WWOX;RP11-190D6.2	intron_variant;downstream_gene_variant;intron_variant,NMD_transcript_variant;intron_variant,non_coding_transcript_variant
SANAD_LRR_Joint_model	chr16	78273279	drug_response	-0.000827	0.000813	0.959	WWOX;RP11-190D6.2	intron_variant;intron_variant,non_coding_transcript_variant;intron_variant,NMD_transcript_variant
SANAD_LRR_univariate	chr16	78273279	drug_response	-0.000827	-0.296	0.648	WWOX;RP11-190D6.2	intron_variant;intron_variant,NMD_transcript_variant;intron_variant,non_coding_transcript_variant
SANAD_LRR_Joint_model	chr16	78280176	drug_response	0.0147	0.00189	0.859	WWOX	intron_variant;intron_variant,non_coding_transcript_variant;intron_variant,NMD_transcript_variant
SANAD_LRR_univariate	chr16	78280176	drug_response	0.0147	-0.0886	0.927	WWOX	intron_variant;intron_variant,NMD_transcript_variant;intron_variant,non_coding_transcript_variant
SANAD_LRR_Joint_model	chr16	78282287	drug_response	0.0189	-0.0122	0.595	WWOX	intron_variant;intron_variant,non_coding_transcript_variant;intron_variant,NMD_transcript_variant
SANAD_LRR_univariate	chr16	78282287	drug_response	0.0189	-0.0426	0.931	WWOX	intron_variant;intron_variant,NMD_transcript_variant;intron_variant,non_coding_transcript_variant
SANAD_LRR_Joint_model	chr16	78283761	drug_response	0.00623	-0.00523	0.658	WWOX	intron_variant;intron_variant,non_coding_transcript_variant;intron_variant,NMD_transcript_variant
SANAD_LRR_univariate	chr16	78283761	drug_response	0.00623	-1.34	0.143	WWOX	intron_variant;intron_variant,NMD_transcript_variant;intron_variant,non_coding_transcript_variant
SANAD_Genotype_Joint_model	chr16	78291853	drug_response	0.000456	0.000642	0.267	WWOX	intron_variant,non_coding_transcript_variant;intron_variant;intron_variant,NMD_transcript_variant
SANAD_Genotype_Univariate	chr16	78291853	drug_response	0.000456	331	0.177	WWOX	intron_variant,non_coding_transcript_variant;intron_variant;intron_variant,NMD_transcript_variant
SANAD_LRR_Joint_model	chr16	78291853	drug_response	-0.0363	-0.0108	0.695	WWOX	intron_variant;intron_variant,non_coding_transcript_variant;intron_variant,NMD_transcript_variant
SANAD_LRR_univariate	chr16	78291853	drug_response	-0.0363	-0.249	0.524	WWOX	intron_variant;intron_variant,NMD_transcript_variant;intron_variant,non_coding_transcript_variant
SANAD_LRR_Joint_model	chr16	78295798	drug_response	-0.0329	-0.00245	0.905	WWOX	intron_variant;intron_variant,non_coding_transcript_variant;intron_variant,NMD_transcript_variant
SANAD_LRR_univariate	chr16	78295798	drug_response	-0.0329	-0.0288	0.954	WWOX	intron_variant;intron_variant,NMD_transcript_variant;intron_variant,non_coding_transcript_variant
SANAD_LRR_Joint_model	chr16	78303266	drug_response	0.00598	-0.000988	0.928	WWOX	intron_variant;intron_variant,non_coding_transcript_variant;intron_variant,NMD_transcript_variant
SANAD_LRR_univariate	chr16	78303266	drug_response	0.00598	-1.16	0.216	WWOX	intron_variant;intron_variant,NMD_transcript_variant;intron_variant,non_coding_transcript_variant
SANAD_LRR_Joint_model	chr16	78306219	drug_response	0.00893	0.00839	0.568	WWOX	intron_variant;downstream_gene_variant;intron_variant,non_coding_transcript_variant;intron_variant,NMD_transcript_variant
SANAD_LRR_univariate	chr16	78306219	drug_response	0.00893	-0.157	0.84	WWOX	intron_variant;downstream_gene_variant;intron_variant,NMD_transcript_variant;intron_variant,non_coding_transcript_variant
SANAD_LRR_Joint_model	chr16	78308940	drug_response	-0.0111	0.0114	0.408	WWOX	intron_variant;downstream_gene_variant;intron_variant,non_coding_transcript_variant;intron_variant,NMD_transcript_variant
SANAD_LRR_univariate	chr16	78308940	drug_response	-0.0111	1.6	0.0948	WWOX	intron_variant;downstream_gene_variant;intron_variant,NMD_transcript_variant;intron_variant,non_coding_transcript_variant
SANAD_LRR_Joint_model	chr16	78311773	drug_response	-0.0103	-0.0154	0.432	WWOX	intron_variant;intron_variant,non_coding_transcript_variant;intron_variant,NMD_transcript_variant
SANAD_LRR_univariate	chr16	78311773	drug_response	-0.0103	-0.75	0.248	WWOX	intron_variant;intron_variant,NMD_transcript_variant;intron_variant,non_coding_transcript_variant
SANAD_Genotype_Joint_model	chr16	78316266	drug_response	0.00117	-0.000483	0.368	WWOX	downstream_gene_variant;intron_variant,non_coding_transcript_variant;intron_variant;intron_variant,NMD_transcript_variant
SANAD_Genotype_Univariate	chr16	78316266	drug_response	0.00117	-310	0.0654	WWOX	downstream_gene_variant;intron_variant,non_coding_transcript_variant;intron_variant;intron_variant,NMD_transcript_variant
SANAD_LRR_Joint_model	chr16	78316266	drug_response	0.00902	-0.000912	0.949	WWOX	intron_variant;downstream_gene_variant;intron_variant,non_coding_transcript_variant;intron_variant,NMD_transcript_variant
SANAD_LRR_univariate	chr16	78316266	drug_response	0.00902	-0.179	0.8	WWOX	intron_variant;downstream_gene_variant;intron_variant,NMD_transcript_variant;intron_variant,non_coding_transcript_variant
SANAD_Genotype_Joint_model	chr16	78317465	drug_response	0.000781	-0.000105	0.417	WWOX	downstream_gene_variant;intron_variant,non_coding_transcript_variant;intron_variant;intron_variant,NMD_transcript_variant
SANAD_Genotype_Univariate	chr16	78317465	drug_response	0.000781	-675	0.152	WWOX	downstream_gene_variant;intron_variant,non_coding_transcript_variant;intron_variant;intron_variant,NMD_transcript_variant
SANAD_LRR_Joint_model	chr16	78317465	drug_response	-0.00256	-0.000617	0.961	WWOX	intron_variant;downstream_gene_variant;intron_variant,non_coding_transcript_variant;intron_variant,NMD_transcript_variant
SANAD_LRR_univariate	chr16	78317465	drug_response	-0.00256	-0.126	0.876	WWOX	intron_variant;downstream_gene_variant;intron_variant,NMD_transcript_variant;intron_variant,non_coding_transcript_variant
SANAD_LRR_univariate	chr16	78319418	drug_response	-0.00397	-0.141	0.874	WWOX	intron_variant;downstream_gene_variant;intron_variant,NMD_transcript_variant;intron_variant,non_coding_transcript_variant
SANAD_Genotype_Joint_model	chr16	78320653	drug_response	0.003	0.00501	0.526	WWOX	intron_variant,non_coding_transcript_variant;intron_variant;intron_variant,NMD_transcript_variant
SANAD_Genotype_Univariate	chr16	78320653	drug_response	0.003	1.14	0.453	WWOX	intron_variant,non_coding_transcript_variant;intron_variant;intron_variant,NMD_transcript_variant
SANAD_LRR_Joint_model	chr16	78320653	drug_response	-0.0311	0.00437	0.793	WWOX	intron_variant;intron_variant,non_coding_transcript_variant;intron_variant,NMD_transcript_variant
SANAD_LRR_univariate	chr16	78320653	drug_response	-0.0311	0.196	0.755	WWOX	intron_variant;intron_variant,NMD_transcript_variant;intron_variant,non_coding_transcript_variant
SANAD_Genotype_Joint_model	chr16	78324964	drug_response	0.0026	0.00423	0.607	WWOX	intron_variant,non_coding_transcript_variant;intron_variant;intron_variant,NMD_transcript_variant
SANAD_Genotype_Univariate	chr16	78324964	drug_response	0.0026	0.526	0.693	WWOX	intron_variant,non_coding_transcript_variant;intron_variant;intron_variant,NMD_transcript_variant
SANAD_LRR_Joint_model	chr16	78324964	drug_response	-0.000395	0.00937	0.54	WWOX	intron_variant;intron_variant,non_coding_transcript_variant;intron_variant,NMD_transcript_variant
SANAD_LRR_univariate	chr16	78324964	drug_response	-0.000395	0.0548	0.942	WWOX	intron_variant;intron_variant,NMD_transcript_variant;intron_variant,non_coding_transcript_variant
SANAD_Genotype_Joint_model	chr16	78326209	drug_response	0.00765	0.00421	0.683	WWOX	intron_variant,non_coding_transcript_variant;intron_variant;intron_variant,NMD_transcript_variant
SANAD_Genotype_Univariate	chr16	78326209	drug_response	0.00765	0.99	0.354	WWOX	intron_variant,non_coding_transcript_variant;intron_variant;intron_variant,NMD_transcript_variant
SANAD_LRR_Joint_model	chr16	78326209	drug_response	-0.0032	-0.0198	0.523	WWOX	intron_variant;intron_variant,non_coding_transcript_variant;intron_variant,NMD_transcript_variant
SANAD_LRR_univariate	chr16	78326209	drug_response	-0.0032	-0.29	0.444	WWOX	intron_variant;intron_variant,NMD_transcript_variant;intron_variant,non_coding_transcript_variant
SANAD_Genotype_Joint_model	chr16	78331559	drug_response	0.00283	-0.000265	0.915	WWOX	intron_variant,non_coding_transcript_variant;intron_variant;intron_variant,NMD_transcript_variant
SANAD_Genotype_Univariate	chr16	78331559	drug_response	0.00283	1300	0.0594	WWOX	intron_variant,non_coding_transcript_variant;intron_variant;intron_variant,NMD_transcript_variant
SANAD_LRR_Joint_model	chr16	78331559	drug_response	0.00612	0.00227	0.869	WWOX	intron_variant;intron_variant,non_coding_transcript_variant;intron_variant,NMD_transcript_variant
SANAD_LRR_univariate	chr16	78331559	drug_response	0.00612	0.598	0.426	WWOX	intron_variant;intron_variant,NMD_transcript_variant;intron_variant,non_coding_transcript_variant
SANAD_Genotype_Joint_model	chr16	78332174	drug_response	0.0028	0.000636	0.694	WWOX	intron_variant,non_coding_transcript_variant;intron_variant;intron_variant,NMD_transcript_variant
SANAD_Genotype_Univariate	chr16	78332174	drug_response	0.0028	29	0.205	WWOX	intron_variant,non_coding_transcript_variant;intron_variant;intron_variant,NMD_transcript_variant
SANAD_LRR_Joint_model	chr16	78332174	drug_response	0.00924	-0.0115	0.533	WWOX	intron_variant;intron_variant,non_coding_transcript_variant;intron_variant,NMD_transcript_variant
SANAD_LRR_univariate	chr16	78332174	drug_response	0.00924	0.014	0.982	WWOX	intron_variant;intron_variant,NMD_transcript_variant;intron_variant,non_coding_transcript_variant
SANAD_Genotype_Joint_model	chr16	78332721	drug_response	0.00221	0.000131	0.579	WWOX	intron_variant,non_coding_transcript_variant;intron_variant;intron_variant,NMD_transcript_variant
SANAD_Genotype_Univariate	chr16	78332721	drug_response	0.00221	1090	0.169	WWOX	intron_variant,non_coding_transcript_variant;intron_variant;intron_variant,NMD_transcript_variant
SANAD_LRR_Joint_model	chr16	78332721	drug_response	-0.00412	-0.00895	0.511	WWOX	intron_variant;intron_variant,non_coding_transcript_variant;intron_variant,NMD_transcript_variant
SANAD_LRR_univariate	chr16	78332721	drug_response	-0.00412	-0.621	0.476	WWOX	intron_variant;intron_variant,NMD_transcript_variant;intron_variant,non_coding_transcript_variant
SANAD_Genotype_Joint_model	chr16	78337035	drug_response	0.00516	0.00151	0.507	WWOX	intron_variant,non_coding_transcript_variant;intron_variant;intron_variant,NMD_transcript_variant
SANAD_Genotype_Univariate	chr16	78337035	drug_response	0.00516	9.64	0.184	WWOX	intron_variant,non_coding_transcript_variant;intron_variant;intron_variant,NMD_transcript_variant
SANAD_LRR_Joint_model	chr16	78337035	drug_response	-0.0459	-0.0252	0.438	WWOX	intron_variant;intron_variant,non_coding_transcript_variant;intron_variant,NMD_transcript_variant
SANAD_LRR_univariate	chr16	78337035	drug_response	-0.0459	-0.585	0.134	WWOX	intron_variant;intron_variant,NMD_transcript_variant;intron_variant,non_coding_transcript_variant
SANAD_Genotype_Joint_model	chr16	78338764	drug_response	0.00109	8.68e-05	0.833	WWOX	intron_variant,non_coding_transcript_variant;intron_variant;intron_variant,NMD_transcript_variant
SANAD_Genotype_Univariate	chr16	78338764	drug_response	0.00109	154	0.353	WWOX	intron_variant,non_coding_transcript_variant;intron_variant;intron_variant,NMD_transcript_variant
SANAD_LRR_Joint_model	chr16	78338764	drug_response	-0.00535	5.43e-05	0.996	WWOX	intron_variant;intron_variant,non_coding_transcript_variant;intron_variant,NMD_transcript_variant
SANAD_LRR_univariate	chr16	78338764	drug_response	-0.00535	-0.562	0.516	WWOX	intron_variant;intron_variant,NMD_transcript_variant;intron_variant,non_coding_transcript_variant
SANAD_LRR_Joint_model	chr16	78345435	drug_response	0.011	0.00978	0.476	WWOX	intron_variant;intron_variant,non_coding_transcript_variant;intron_variant,NMD_transcript_variant
SANAD_LRR_univariate	chr16	78345435	drug_response	0.011	1.6	0.0754	WWOX	intron_variant;intron_variant,NMD_transcript_variant;intron_variant,non_coding_transcript_variant
SANAD_Genotype_Joint_model	chr16	78346675	drug_response	0.00103	-1.3e-05	0.791	WWOX	intron_variant,non_coding_transcript_variant;intron_variant;intron_variant,NMD_transcript_variant
SANAD_Genotype_Univariate	chr16	78346675	drug_response	0.00103	1320	0.301	WWOX	intron_variant,non_coding_transcript_variant;intron_variant;intron_variant,NMD_transcript_variant
SANAD_LRR_Joint_model	chr16	78346675	drug_response	0.00579	0.00695	0.613	WWOX	intron_variant;intron_variant,non_coding_transcript_variant;intron_variant,NMD_transcript_variant
SANAD_LRR_Joint_model	chr16	78346675	drug_response	0.00579	0.00695	0.613	WWOX	intron_variant;intron_variant,non_coding_transcript_variant;intron_variant,NMD_transcript_variant
SANAD_LRR_univariate	chr16	78346675	drug_response	0.00579	0.13	0.875	WWOX	intron_variant;intron_variant,NMD_transcript_variant;intron_variant,non_coding_transcript_variant
SANAD_LRR_univariate	chr16	78346675	drug_response	0.00579	0.13	0.875	WWOX	intron_variant;intron_variant,NMD_transcript_variant;intron_variant,non_coding_transcript_variant
SANAD_Genotype_Joint_model	chr16	78347738	drug_response	0.0026	-0.00236	0.304	WWOX	intron_variant,non_coding_transcript_variant;intron_variant;intron_variant,NMD_transcript_variant
SANAD_Genotype_Joint_model	chr16	78347738	drug_response	0.00222	-0.00189	0.321	WWOX	intron_variant,non_coding_transcript_variant;intron_variant;intron_variant,NMD_transcript_variant
SANAD_Genotype_Univariate	chr16	78347738	drug_response	0.0026	-24.8	0.0245	WWOX	intron_variant,non_coding_transcript_variant;intron_variant;intron_variant,NMD_transcript_variant
SANAD_Genotype_Univariate	chr16	78347738	drug_response	0.00222	-25.4	0.0352	WWOX	intron_variant,non_coding_transcript_variant;intron_variant;intron_variant,NMD_transcript_variant
SANAD_LRR_Joint_model	chr16	78347738	drug_response	-0.00802	-0.00874	0.658	WWOX	intron_variant;intron_variant,non_coding_transcript_variant;intron_variant,NMD_transcript_variant
SANAD_LRR_Joint_model	chr16	78347738	drug_response	-0.00802	-0.00874	0.658	WWOX	intron_variant;intron_variant,non_coding_transcript_variant;intron_variant,NMD_transcript_variant
SANAD_LRR_univariate	chr16	78347738	drug_response	-0.00802	-0.302	0.584	WWOX	intron_variant;intron_variant,NMD_transcript_variant;intron_variant,non_coding_transcript_variant
SANAD_LRR_univariate	chr16	78347738	drug_response	-0.00802	-0.302	0.584	WWOX	intron_variant;intron_variant,NMD_transcript_variant;intron_variant,non_coding_transcript_variant
SANAD_Genotype_Joint_model	chr16	78351904	drug_response	0.00192	-0.000305	0.384	WWOX	intron_variant,non_coding_transcript_variant;intron_variant;intron_variant,NMD_transcript_variant
SANAD_Genotype_Joint_model	chr16	78351904	drug_response	0.00145	-0.000181	0.39	WWOX	intron_variant,non_coding_transcript_variant;intron_variant;intron_variant,NMD_transcript_variant
SANAD_Genotype_Univariate	chr16	78351904	drug_response	0.00145	-430	0.148	WWOX	intron_variant,non_coding_transcript_variant;intron_variant;intron_variant,NMD_transcript_variant
SANAD_Genotype_Univariate	chr16	78351904	drug_response	0.00192	-37.1	0.344	WWOX	intron_variant,non_coding_transcript_variant;intron_variant;intron_variant,NMD_transcript_variant
SANAD_LRR_Joint_model	chr16	78351904	drug_response	0.0083	0.00603	0.614	WWOX	intron_variant;intron_variant,non_coding_transcript_variant;intron_variant,NMD_transcript_variant
SANAD_LRR_Joint_model	chr16	78351904	drug_response	0.0083	0.00603	0.614	WWOX	intron_variant;intron_variant,non_coding_transcript_variant;intron_variant,NMD_transcript_variant
SANAD_LRR_univariate	chr16	78351904	drug_response	0.0083	0.664	0.477	WWOX	intron_variant;intron_variant,NMD_transcript_variant;intron_variant,non_coding_transcript_variant
SANAD_LRR_univariate	chr16	78351904	drug_response	0.0083	0.664	0.477	WWOX	intron_variant;intron_variant,NMD_transcript_variant;intron_variant,non_coding_transcript_variant
SANAD_Genotype_Joint_model	chr16	78352757	drug_response	0.000874	-9.76e-05	0.421	WWOX	intron_variant,non_coding_transcript_variant;intron_variant;intron_variant,NMD_transcript_variant
SANAD_Genotype_Joint_model	chr16	78352757	drug_response	0.00134	-0.000107	0.421	WWOX	intron_variant,non_coding_transcript_variant;intron_variant;intron_variant,NMD_transcript_variant
SANAD_Genotype_Univariate	chr16	78352757	drug_response	0.000874	-696	0.191	WWOX	intron_variant,non_coding_transcript_variant;intron_variant;intron_variant,NMD_transcript_variant
SANAD_Genotype_Univariate	chr16	78352757	drug_response	0.00134	-632	0.191	WWOX	intron_variant,non_coding_transcript_variant;intron_variant;intron_variant,NMD_transcript_variant
SANAD_LRR_Joint_model	chr16	78352757	drug_response	-0.0112	-0.00445	0.641	WWOX	intron_variant;intron_variant,non_coding_transcript_variant;intron_variant,NMD_transcript_variant
SANAD_LRR_Joint_model	chr16	78352757	drug_response	-0.0112	-0.00445	0.641	WWOX	intron_variant;intron_variant,non_coding_transcript_variant;intron_variant,NMD_transcript_variant
SANAD_LRR_univariate	chr16	78352757	drug_response	-0.0112	-0.291	0.802	WWOX	intron_variant;intron_variant,NMD_transcript_variant;intron_variant,non_coding_transcript_variant
SANAD_LRR_univariate	chr16	78352757	drug_response	-0.0112	-0.291	0.802	WWOX	intron_variant;intron_variant,NMD_transcript_variant;intron_variant,non_coding_transcript_variant
SANAD_Genotype_Joint_model	chr16	78356662	drug_response	0.00276	-7.34e-05	0.932	WWOX	intron_variant,non_coding_transcript_variant;intron_variant;intron_variant,NMD_transcript_variant
SANAD_Genotype_Joint_model	chr16	78356662	drug_response	0.00305	9.26e-05	0.933	WWOX	intron_variant,non_coding_transcript_variant;intron_variant;intron_variant,NMD_transcript_variant
SANAD_Genotype_Univariate	chr16	78356662	drug_response	0.00276	-7.56	0.504	WWOX	intron_variant,non_coding_transcript_variant;intron_variant;intron_variant,NMD_transcript_variant
SANAD_Genotype_Univariate	chr16	78356662	drug_response	0.00305	-4.37	0.617	WWOX	intron_variant,non_coding_transcript_variant;intron_variant;intron_variant,NMD_transcript_variant
SANAD_LRR_Joint_model	chr16	78356662	drug_response	0.00294	-0.00246	0.839	WWOX	intron_variant;intron_variant,non_coding_transcript_variant;intron_variant,NMD_transcript_variant
SANAD_LRR_Joint_model	chr16	78356662	drug_response	0.00294	-0.00246	0.839	WWOX	intron_variant;intron_variant,non_coding_transcript_variant;intron_variant,NMD_transcript_variant
SANAD_LRR_univariate	chr16	78356662	drug_response	0.00294	-0.212	0.803	WWOX	intron_variant;intron_variant,NMD_transcript_variant;intron_variant,non_coding_transcript_variant
SANAD_LRR_univariate	chr16	78356662	drug_response	0.00294	-0.212	0.803	WWOX	intron_variant;intron_variant,NMD_transcript_variant;intron_variant,non_coding_transcript_variant
SANAD_Genotype_Joint_model	chr16	78360663	drug_response	0.00595	-0.00416	0.561	WWOX	intron_variant,non_coding_transcript_variant;intron_variant;intron_variant,NMD_transcript_variant
SANAD_Genotype_Joint_model	chr16	78360663	drug_response	0.00603	-0.00279	0.655	WWOX	intron_variant,non_coding_transcript_variant;intron_variant;intron_variant,NMD_transcript_variant
SANAD_Genotype_Univariate	chr16	78360663	drug_response	0.00595	-1.72	0.282	WWOX	intron_variant,non_coding_transcript_variant;intron_variant;intron_variant,NMD_transcript_variant
SANAD_Genotype_Univariate	chr16	78360663	drug_response	0.00603	-1.47	0.391	WWOX	intron_variant,non_coding_transcript_variant;intron_variant;intron_variant,NMD_transcript_variant
SANAD_LRR_Joint_model	chr16	78360663	drug_response	-0.0105	0.00816	0.684	WWOX	intron_variant;intron_variant,non_coding_transcript_variant;intron_variant,NMD_transcript_variant
SANAD_LRR_Joint_model	chr16	78360663	drug_response	-0.0105	0.00816	0.684	WWOX	intron_variant;intron_variant,non_coding_transcript_variant;intron_variant,NMD_transcript_variant
SANAD_LRR_univariate	chr16	78360663	drug_response	-0.0105	0.583	0.278	WWOX	intron_variant;intron_variant,NMD_transcript_variant;intron_variant,non_coding_transcript_variant
SANAD_LRR_univariate	chr16	78360663	drug_response	-0.0105	0.583	0.278	WWOX	intron_variant;intron_variant,NMD_transcript_variant;intron_variant,non_coding_transcript_variant
SANAD_Genotype_Joint_model	chr16	78361149	drug_response	0.0048	-0.00174	0.592	WWOX	intron_variant,non_coding_transcript_variant;intron_variant;intron_variant,NMD_transcript_variant
SANAD_Genotype_Joint_model	chr16	78361149	drug_response	0.00495	-0.000511	0.854	WWOX	intron_variant,non_coding_transcript_variant;intron_variant;intron_variant,NMD_transcript_variant
SANAD_Genotype_Univariate	chr16	78361149	drug_response	0.0048	-4.77	0.175	WWOX	intron_variant,non_coding_transcript_variant;intron_variant;intron_variant,NMD_transcript_variant
SANAD_Genotype_Univariate	chr16	78361149	drug_response	0.00495	-3.34	0.354	WWOX	intron_variant,non_coding_transcript_variant;intron_variant;intron_variant,NMD_transcript_variant
SANAD_LRR_Joint_model	chr16	78361149	drug_response	0.00231	-0.0215	0.403	WWOX	intron_variant;intron_variant,non_coding_transcript_variant;intron_variant,NMD_transcript_variant
SANAD_LRR_Joint_model	chr16	78361149	drug_response	0.00231	-0.0215	0.403	WWOX	intron_variant;intron_variant,non_coding_transcript_variant;intron_variant,NMD_transcript_variant
SANAD_LRR_univariate	chr16	78361149	drug_response	0.00231	-0.936	0.0656	WWOX	intron_variant;intron_variant,NMD_transcript_variant;intron_variant,non_coding_transcript_variant
SANAD_LRR_univariate	chr16	78361149	drug_response	0.00231	-0.936	0.0656	WWOX	intron_variant;intron_variant,NMD_transcript_variant;intron_variant,non_coding_transcript_variant
SANAD_Genotype_Joint_model	chr16	78365127	drug_response	0.00419	-0.013	0.29	WWOX	intron_variant,non_coding_transcript_variant;intron_variant;intron_variant,NMD_transcript_variant
SANAD_Genotype_Joint_model	chr16	78365127	drug_response	0.00427	-0.0128	0.295	WWOX	intron_variant,non_coding_transcript_variant;intron_variant;intron_variant,NMD_transcript_variant
SANAD_Genotype_Univariate	chr16	78365127	drug_response	0.00419	-4.06	0.0159	WWOX	intron_variant,non_coding_transcript_variant;intron_variant;intron_variant,NMD_transcript_variant
SANAD_Genotype_Univariate	chr16	78365127	drug_response	0.00427	-3.83	0.0174	WWOX	intron_variant,non_coding_transcript_variant;intron_variant;intron_variant,NMD_transcript_variant
SANAD_LRR_Joint_model	chr16	78365127	drug_response	0.00112	-0.0242	0.331	WWOX	intron_variant;intron_variant,non_coding_transcript_variant;intron_variant,NMD_transcript_variant
SANAD_LRR_Joint_model	chr16	78365127	drug_response	0.00112	-0.0242	0.331	WWOX	intron_variant;intron_variant,non_coding_transcript_variant;intron_variant,NMD_transcript_variant
SANAD_LRR_univariate	chr16	78365127	drug_response	0.00112	-1.23	0.035	WWOX	intron_variant;intron_variant,NMD_transcript_variant;intron_variant,non_coding_transcript_variant
SANAD_LRR_univariate	chr16	78365127	drug_response	0.00112	-1.23	0.035	WWOX	intron_variant;intron_variant,NMD_transcript_variant;intron_variant,non_coding_transcript_variant
SANAD_Genotype_Joint_model	chr16	78367814	drug_response	0.00362	-0.0143	0.264	WWOX	intron_variant,non_coding_transcript_variant;intron_variant;intron_variant,NMD_transcript_variant
SANAD_Genotype_Joint_model	chr16	78367814	drug_response	0.00358	-0.0142	0.265	WWOX	intron_variant,non_coding_transcript_variant;intron_variant;intron_variant,NMD_transcript_variant
SANAD_Genotype_Univariate	chr16	78367814	drug_response	0.00362	-7.38	0.00561	WWOX	intron_variant,non_coding_transcript_variant;intron_variant;intron_variant,NMD_transcript_variant
SANAD_Genotype_Univariate	chr16	78367814	drug_response	0.00358	-7.41	0.00563	WWOX	intron_variant,non_coding_transcript_variant;intron_variant;intron_variant,NMD_transcript_variant
SANAD_LRR_Joint_model	chr16	78367814	drug_response	-0.0194	-0.000943	0.953	WWOX	intron_variant;intron_variant,non_coding_transcript_variant;intron_variant,NMD_transcript_variant
SANAD_LRR_Joint_model	chr16	78367814	drug_response	-0.0194	-0.000943	0.953	WWOX	intron_variant;intron_variant,non_coding_transcript_variant;intron_variant,NMD_transcript_variant
SANAD_LRR_univariate	chr16	78367814	drug_response	-0.0194	-0.264	0.678	WWOX	intron_variant;intron_variant,NMD_transcript_variant;intron_variant,non_coding_transcript_variant
SANAD_LRR_univariate	chr16	78367814	drug_response	-0.0194	-0.264	0.678	WWOX	intron_variant;intron_variant,NMD_transcript_variant;intron_variant,non_coding_transcript_variant
SANAD_Genotype_Joint_model	chr16	78369690	drug_response	0.00219	-0.00572	0.382	WWOX	intron_variant,non_coding_transcript_variant;intron_variant;intron_variant,NMD_transcript_variant
SANAD_Genotype_Joint_model	chr16	78369690	drug_response	0.00207	-0.00554	0.39	WWOX	intron_variant,non_coding_transcript_variant;intron_variant;intron_variant,NMD_transcript_variant
SANAD_Genotype_Univariate	chr16	78369690	drug_response	0.00219	-15	0.047	WWOX	intron_variant,non_coding_transcript_variant;intron_variant;intron_variant,NMD_transcript_variant
SANAD_Genotype_Univariate	chr16	78369690	drug_response	0.00207	-16.7	0.0528	WWOX	intron_variant,non_coding_transcript_variant;intron_variant;intron_variant,NMD_transcript_variant
SANAD_LRR_Joint_model	chr16	78369690	drug_response	0.00245	-0.00168	0.893	WWOX	intron_variant;intron_variant,non_coding_transcript_variant;intron_variant,NMD_transcript_variant
SANAD_LRR_Joint_model	chr16	78369690	drug_response	0.00245	-0.00168	0.893	WWOX	intron_variant;intron_variant,non_coding_transcript_variant;intron_variant,NMD_transcript_variant
SANAD_LRR_univariate	chr16	78369690	drug_response	0.00245	-0.988	0.225	WWOX	intron_variant;intron_variant,NMD_transcript_variant;intron_variant,non_coding_transcript_variant
SANAD_LRR_univariate	chr16	78369690	drug_response	0.00245	-0.988	0.225	WWOX	intron_variant;intron_variant,NMD_transcript_variant;intron_variant,non_coding_transcript_variant
SANAD_Genotype_Joint_model	chr16	78371002	drug_response	0.00634	-0.000263	0.971	WWOX	intron_variant,non_coding_transcript_variant;intron_variant;intron_variant,NMD_transcript_variant
SANAD_Genotype_Joint_model	chr16	78371002	drug_response	0.00663	6.57e-05	0.993	WWOX	intron_variant,non_coding_transcript_variant;intron_variant;intron_variant,NMD_transcript_variant
SANAD_Genotype_Univariate	chr16	78371002	drug_response	0.00634	-0.551	0.692	WWOX	intron_variant,non_coding_transcript_variant;intron_variant;intron_variant,NMD_transcript_variant
SANAD_Genotype_Univariate	chr16	78371002	drug_response	0.00663	-0.478	0.721	WWOX	intron_variant,non_coding_transcript_variant;intron_variant;intron_variant,NMD_transcript_variant
SANAD_LRR_Joint_model	chr16	78371002	drug_response	0.00483	0.00248	0.888	WWOX	intron_variant;intron_variant,non_coding_transcript_variant;intron_variant,NMD_transcript_variant
SANAD_LRR_Joint_model	chr16	78371002	drug_response	0.00483	0.00248	0.888	WWOX	intron_variant;intron_variant,non_coding_transcript_variant;intron_variant,NMD_transcript_variant
SANAD_LRR_univariate	chr16	78371002	drug_response	0.00483	0.00181	0.998	WWOX	intron_variant;intron_variant,NMD_transcript_variant;intron_variant,non_coding_transcript_variant
SANAD_LRR_univariate	chr16	78371002	drug_response	0.00483	0.00181	0.998	WWOX	intron_variant;intron_variant,NMD_transcript_variant;intron_variant,non_coding_transcript_variant
SANAD_Genotype_Joint_model	chr16	78373644	drug_response	0.473	0.215	0.189	WWOX	intron_variant,non_coding_transcript_variant;intron_variant;intron_variant,NMD_transcript_variant
SANAD_Genotype_Joint_model	chr16	78373644	drug_response	0.473	0.215	0.189	WWOX	intron_variant,non_coding_transcript_variant;intron_variant;intron_variant,NMD_transcript_variant
SANAD_Genotype_Joint_modelVS	chr16	78373644	drug_response	0.473	0.156	0.00761	WWOX	intron_variant,non_coding_transcript_variant;intron_variant,NMD_transcript_variant;intron_variant
SANAD_Genotype_Joint_modelVS	chr16	78373644	drug_response	0.473	0.156	0.00761	WWOX	intron_variant,non_coding_transcript_variant;intron_variant,NMD_transcript_variant;intron_variant
SANAD_Genotype_Univariate	chr16	78373644	drug_response	0.473	0.33	0.00772	WWOX	intron_variant,non_coding_transcript_variant;intron_variant;intron_variant,NMD_transcript_variant
SANAD_Genotype_Univariate	chr16	78373644	drug_response	0.473	0.33	0.00772	WWOX	intron_variant,non_coding_transcript_variant;intron_variant;intron_variant,NMD_transcript_variant
SANAD_LRR_Joint_model	chr16	78373644	drug_response	-0.578	0.834	0.155	WWOX	intron_variant;intron_variant,non_coding_transcript_variant;intron_variant,NMD_transcript_variant
SANAD_LRR_Joint_model	chr16	78373644	drug_response	-0.578	0.834	0.155	WWOX	intron_variant;intron_variant,non_coding_transcript_variant;intron_variant,NMD_transcript_variant
SANAD_LRR_Joint_modelVS	chr16	78373644	drug_response	-0.578	0.623	0.000749	WWOX	intron_variant,NMD_transcript_variant;intron_variant;intron_variant,non_coding_transcript_variant
SANAD_LRR_Joint_modelVS	chr16	78373644	drug_response	-0.578	0.623	0.000749	WWOX	intron_variant,NMD_transcript_variant;intron_variant;intron_variant,non_coding_transcript_variant
SANAD_LRR_univariate	chr16	78373644	drug_response	-0.578	0.144	0.000534	WWOX	intron_variant;intron_variant,NMD_transcript_variant;intron_variant,non_coding_transcript_variant
SANAD_LRR_univariate	chr16	78373644	drug_response	-0.578	0.144	0.000534	WWOX	intron_variant;intron_variant,NMD_transcript_variant;intron_variant,non_coding_transcript_variant
SANAD_LRR_Joint_model	chr16	78373747	drug_response	-0.47	0.652	0.154	WWOX	intron_variant;intron_variant,non_coding_transcript_variant;intron_variant,NMD_transcript_variant
SANAD_LRR_Joint_model	chr16	78373747	drug_response	-0.47	0.652	0.154	WWOX	intron_variant;intron_variant,non_coding_transcript_variant;intron_variant,NMD_transcript_variant
SANAD_LRR_Joint_modelVS	chr16	78373747	drug_response	-0.47	0.483	0.000754	WWOX	intron_variant,NMD_transcript_variant;intron_variant;intron_variant,non_coding_transcript_variant
SANAD_LRR_Joint_modelVS	chr16	78373747	drug_response	-0.47	0.483	0.000754	WWOX	intron_variant,NMD_transcript_variant;intron_variant;intron_variant,non_coding_transcript_variant
SANAD_LRR_univariate	chr16	78373747	drug_response	-0.47	0.184	0.000567	WWOX	intron_variant;intron_variant,NMD_transcript_variant;intron_variant,non_coding_transcript_variant
SANAD_LRR_univariate	chr16	78373747	drug_response	-0.47	0.184	0.000567	WWOX	intron_variant;intron_variant,NMD_transcript_variant;intron_variant,non_coding_transcript_variant
SANAD_LRR_Joint_model	chr16	78373801	drug_response	-0.491	0.647	0.162	WWOX	intron_variant;intron_variant,non_coding_transcript_variant;intron_variant,NMD_transcript_variant
SANAD_LRR_Joint_model	chr16	78373801	drug_response	-0.491	0.647	0.162	WWOX	intron_variant;intron_variant,non_coding_transcript_variant;intron_variant,NMD_transcript_variant
SANAD_LRR_Joint_modelVS	chr16	78373801	drug_response	-0.491	0.492	0.00103	WWOX	intron_variant,NMD_transcript_variant;intron_variant;intron_variant,non_coding_transcript_variant
SANAD_LRR_Joint_modelVS	chr16	78373801	drug_response	-0.491	0.492	0.00103	WWOX	intron_variant,NMD_transcript_variant;intron_variant;intron_variant,non_coding_transcript_variant
SANAD_LRR_univariate	chr16	78373801	drug_response	-0.491	0.171	0.000799	WWOX	intron_variant;intron_variant,NMD_transcript_variant;intron_variant,non_coding_transcript_variant
SANAD_LRR_univariate	chr16	78373801	drug_response	-0.491	0.171	0.000799	WWOX	intron_variant;intron_variant,NMD_transcript_variant;intron_variant,non_coding_transcript_variant
SANAD_Genotype_Joint_model	chr16	78373847	drug_response	0.473	0.215	0.189	WWOX	intron_variant,non_coding_transcript_variant;intron_variant;intron_variant,NMD_transcript_variant
SANAD_Genotype_Joint_model	chr16	78373847	drug_response	0.473	0.215	0.189	WWOX	intron_variant,non_coding_transcript_variant;intron_variant;intron_variant,NMD_transcript_variant
SANAD_Genotype_Joint_modelVS	chr16	78373847	drug_response	0.473	0.156	0.0076	WWOX	intron_variant,non_coding_transcript_variant;intron_variant,NMD_transcript_variant;intron_variant
SANAD_Genotype_Joint_modelVS	chr16	78373847	drug_response	0.473	0.156	0.0076	WWOX	intron_variant,non_coding_transcript_variant;intron_variant,NMD_transcript_variant;intron_variant
SANAD_Genotype_Univariate	chr16	78373847	drug_response	0.473	0.33	0.00771	WWOX	intron_variant,non_coding_transcript_variant;intron_variant;intron_variant,NMD_transcript_variant
SANAD_Genotype_Univariate	chr16	78373847	drug_response	0.473	0.33	0.00771	WWOX	intron_variant,non_coding_transcript_variant;intron_variant;intron_variant,NMD_transcript_variant
SANAD_LRR_Joint_model	chr16	78373847	drug_response	-0.378	0.477	0.165	WWOX	intron_variant;intron_variant,non_coding_transcript_variant;intron_variant,NMD_transcript_variant
SANAD_LRR_Joint_model	chr16	78373847	drug_response	-0.378	0.477	0.165	WWOX	intron_variant;intron_variant,non_coding_transcript_variant;intron_variant,NMD_transcript_variant
SANAD_LRR_Joint_modelVS	chr16	78373847	drug_response	-0.378	0.366	0.00111	WWOX	intron_variant,NMD_transcript_variant;intron_variant;intron_variant,non_coding_transcript_variant
SANAD_LRR_Joint_modelVS	chr16	78373847	drug_response	-0.378	0.366	0.00111	WWOX	intron_variant,NMD_transcript_variant;intron_variant;intron_variant,non_coding_transcript_variant
SANAD_LRR_univariate	chr16	78373847	drug_response	-0.378	0.226	0.000869	WWOX	intron_variant;intron_variant,NMD_transcript_variant;intron_variant,non_coding_transcript_variant
SANAD_LRR_univariate	chr16	78373847	drug_response	-0.378	0.226	0.000869	WWOX	intron_variant;intron_variant,NMD_transcript_variant;intron_variant,non_coding_transcript_variant
SANAD_Genotype_Joint_model	chr16	78373902	drug_response	0.473	0.215	0.189	WWOX	intron_variant,non_coding_transcript_variant;intron_variant;intron_variant,NMD_transcript_variant
SANAD_Genotype_Joint_model	chr16	78373902	drug_response	0.473	0.215	0.189	WWOX	intron_variant,non_coding_transcript_variant;intron_variant;intron_variant,NMD_transcript_variant
SANAD_Genotype_Joint_modelVS	chr16	78373902	drug_response	0.473	0.156	0.00757	WWOX	intron_variant,non_coding_transcript_variant;intron_variant,NMD_transcript_variant;intron_variant
SANAD_Genotype_Joint_modelVS	chr16	78373902	drug_response	0.473	0.156	0.00758	WWOX	intron_variant,non_coding_transcript_variant;intron_variant,NMD_transcript_variant;intron_variant
SANAD_Genotype_Univariate	chr16	78373902	drug_response	0.473	0.33	0.00768	WWOX	intron_variant,non_coding_transcript_variant;intron_variant;intron_variant,NMD_transcript_variant
SANAD_Genotype_Univariate	chr16	78373902	drug_response	0.473	0.33	0.00769	WWOX	intron_variant,non_coding_transcript_variant;intron_variant;intron_variant,NMD_transcript_variant
SANAD_LRR_Joint_model	chr16	78373902	drug_response	-0.561	0.147	0.244	WWOX	intron_variant;intron_variant,non_coding_transcript_variant;intron_variant,NMD_transcript_variant
SANAD_LRR_Joint_model	chr16	78373902	drug_response	-0.561	0.147	0.244	WWOX	intron_variant;intron_variant,non_coding_transcript_variant;intron_variant,NMD_transcript_variant
SANAD_LRR_univariate	chr16	78373902	drug_response	-0.561	0.243	0.081	WWOX	intron_variant;intron_variant,NMD_transcript_variant;intron_variant,non_coding_transcript_variant
SANAD_LRR_univariate	chr16	78373902	drug_response	-0.561	0.243	0.081	WWOX	intron_variant;intron_variant,NMD_transcript_variant;intron_variant,non_coding_transcript_variant
SANAD_LRR_Joint_model	chr16	78374373	drug_response	-0.003	-0.0168	0.477	WWOX	intron_variant;intron_variant,non_coding_transcript_variant;intron_variant,NMD_transcript_variant
SANAD_LRR_Joint_model	chr16	78374373	drug_response	-0.003	-0.0168	0.477	WWOX	intron_variant;intron_variant,non_coding_transcript_variant;intron_variant,NMD_transcript_variant
SANAD_LRR_univariate	chr16	78374373	drug_response	-0.003	-0.619	0.241	WWOX	intron_variant;intron_variant,NMD_transcript_variant;intron_variant,non_coding_transcript_variant
SANAD_LRR_univariate	chr16	78374373	drug_response	-0.003	-0.619	0.241	WWOX	intron_variant;intron_variant,NMD_transcript_variant;intron_variant,non_coding_transcript_variant
SANAD_LRR_Joint_model	chr16	78374482	drug_response	-0.479	0.599	0.171	WWOX	intron_variant;intron_variant,non_coding_transcript_variant;intron_variant,NMD_transcript_variant
SANAD_LRR_Joint_model	chr16	78374482	drug_response	-0.479	0.599	0.171	WWOX	intron_variant;intron_variant,non_coding_transcript_variant;intron_variant,NMD_transcript_variant
SANAD_LRR_Joint_modelVS	chr16	78374482	drug_response	-0.479	0.424	0.00382	WWOX	intron_variant,NMD_transcript_variant;intron_variant;intron_variant,non_coding_transcript_variant
SANAD_LRR_Joint_modelVS	chr16	78374482	drug_response	-0.479	0.424	0.00382	WWOX	intron_variant,NMD_transcript_variant;intron_variant;intron_variant,non_coding_transcript_variant
SANAD_LRR_univariate	chr16	78374482	drug_response	-0.479	0.151	0.00327	WWOX	intron_variant;intron_variant,NMD_transcript_variant;intron_variant,non_coding_transcript_variant
SANAD_LRR_univariate	chr16	78374482	drug_response	-0.479	0.151	0.00327	WWOX	intron_variant;intron_variant,NMD_transcript_variant;intron_variant,non_coding_transcript_variant
SANAD_LRR_Joint_model	chr16	78374537	drug_response	-0.483	0.708	0.15	WWOX	intron_variant;intron_variant,non_coding_transcript_variant;intron_variant,NMD_transcript_variant
SANAD_LRR_Joint_model	chr16	78374537	drug_response	-0.483	0.708	0.15	WWOX	intron_variant;intron_variant,non_coding_transcript_variant;intron_variant,NMD_transcript_variant
SANAD_LRR_Joint_modelVS	chr16	78374537	drug_response	-0.483	0.532	0.000443	WWOX	intron_variant,NMD_transcript_variant;intron_variant;intron_variant,non_coding_transcript_variant
SANAD_LRR_Joint_modelVS	chr16	78374537	drug_response	-0.483	0.532	0.000443	WWOX	intron_variant,NMD_transcript_variant;intron_variant;intron_variant,non_coding_transcript_variant
SANAD_LRR_univariate	chr16	78374537	drug_response	-0.483	0.184	0.000316	WWOX	intron_variant;intron_variant,NMD_transcript_variant;intron_variant,non_coding_transcript_variant
SANAD_LRR_univariate	chr16	78374537	drug_response	-0.483	0.184	0.000316	WWOX	intron_variant;intron_variant,NMD_transcript_variant;intron_variant,non_coding_transcript_variant
SANAD_LRR_Joint_model	chr16	78374603	drug_response	-0.443	0.617	0.154	WWOX	intron_variant;intron_variant,non_coding_transcript_variant;intron_variant,NMD_transcript_variant
SANAD_LRR_Joint_model	chr16	78374603	drug_response	-0.443	0.617	0.154	WWOX	intron_variant;intron_variant,non_coding_transcript_variant;intron_variant,NMD_transcript_variant
SANAD_LRR_Joint_modelVS	chr16	78374603	drug_response	-0.443	0.479	0.000424	WWOX	intron_variant,NMD_transcript_variant;intron_variant;intron_variant,non_coding_transcript_variant
SANAD_LRR_Joint_modelVS	chr16	78374603	drug_response	-0.443	0.479	0.000424	WWOX	intron_variant,NMD_transcript_variant;intron_variant;intron_variant,non_coding_transcript_variant
SANAD_LRR_univariate	chr16	78374603	drug_response	-0.443	0.203	0.000315	WWOX	intron_variant;intron_variant,NMD_transcript_variant;intron_variant,non_coding_transcript_variant
SANAD_LRR_univariate	chr16	78374603	drug_response	-0.443	0.203	0.000315	WWOX	intron_variant;intron_variant,NMD_transcript_variant;intron_variant,non_coding_transcript_variant
SANAD_Genotype_Joint_model	chr16	78374614	drug_response	0.473	0.215	0.189	WWOX	intron_variant,non_coding_transcript_variant;intron_variant;intron_variant,NMD_transcript_variant
SANAD_Genotype_Joint_model	chr16	78374614	drug_response	0.473	0.215	0.189	WWOX	intron_variant,non_coding_transcript_variant;intron_variant;intron_variant,NMD_transcript_variant
SANAD_Genotype_Joint_modelVS	chr16	78374614	drug_response	0.473	0.156	0.00759	WWOX	intron_variant,non_coding_transcript_variant;intron_variant,NMD_transcript_variant;intron_variant
SANAD_Genotype_Joint_modelVS	chr16	78374614	drug_response	0.473	0.156	0.00759	WWOX	intron_variant,non_coding_transcript_variant;intron_variant,NMD_transcript_variant;intron_variant
SANAD_Genotype_Univariate	chr16	78374614	drug_response	0.473	0.33	0.0077	WWOX	intron_variant,non_coding_transcript_variant;intron_variant;intron_variant,NMD_transcript_variant
SANAD_Genotype_Univariate	chr16	78374614	drug_response	0.473	0.33	0.0077	WWOX	intron_variant,non_coding_transcript_variant;intron_variant;intron_variant,NMD_transcript_variant
SANAD_LRR_Joint_model	chr16	78374614	drug_response	-0.594	0.826	0.156	WWOX	intron_variant;intron_variant,non_coding_transcript_variant;intron_variant,NMD_transcript_variant
SANAD_LRR_Joint_model	chr16	78374614	drug_response	-0.594	0.826	0.156	WWOX	intron_variant;intron_variant,non_coding_transcript_variant;intron_variant,NMD_transcript_variant
SANAD_LRR_Joint_modelVS	chr16	78374614	drug_response	-0.594	0.639	0.000493	WWOX	intron_variant,NMD_transcript_variant;intron_variant;intron_variant,non_coding_transcript_variant
SANAD_LRR_Joint_modelVS	chr16	78374614	drug_response	-0.594	0.639	0.000493	WWOX	intron_variant,NMD_transcript_variant;intron_variant;intron_variant,non_coding_transcript_variant
SANAD_LRR_univariate	chr16	78374614	drug_response	-0.594	0.15	0.000357	WWOX	intron_variant;intron_variant,NMD_transcript_variant;intron_variant,non_coding_transcript_variant
SANAD_LRR_univariate	chr16	78374614	drug_response	-0.594	0.15	0.000357	WWOX	intron_variant;intron_variant,NMD_transcript_variant;intron_variant,non_coding_transcript_variant
SANAD_LRR_Joint_model	chr16	78374717	drug_response	-0.433	0.595	0.154	WWOX	intron_variant;intron_variant,non_coding_transcript_variant;intron_variant,NMD_transcript_variant
SANAD_LRR_Joint_model	chr16	78374717	drug_response	-0.433	0.595	0.154	WWOX	intron_variant;intron_variant,non_coding_transcript_variant;intron_variant,NMD_transcript_variant
SANAD_LRR_Joint_modelVS	chr16	78374717	drug_response	-0.433	0.454	0.000506	WWOX	intron_variant,NMD_transcript_variant;intron_variant;intron_variant,non_coding_transcript_variant
SANAD_LRR_Joint_modelVS	chr16	78374717	drug_response	-0.433	0.454	0.000506	WWOX	intron_variant,NMD_transcript_variant;intron_variant;intron_variant,non_coding_transcript_variant
SANAD_LRR_univariate	chr16	78374717	drug_response	-0.433	0.209	0.000366	WWOX	intron_variant;intron_variant,NMD_transcript_variant;intron_variant,non_coding_transcript_variant
SANAD_LRR_univariate	chr16	78374717	drug_response	-0.433	0.209	0.000366	WWOX	intron_variant;intron_variant,NMD_transcript_variant;intron_variant,non_coding_transcript_variant
SANAD_LRR_Joint_model	chr16	78374781	drug_response	-0.503	0.679	0.159	WWOX	intron_variant;intron_variant,non_coding_transcript_variant;intron_variant,NMD_transcript_variant
SANAD_LRR_Joint_model	chr16	78374781	drug_response	-0.503	0.679	0.159	WWOX	intron_variant;intron_variant,non_coding_transcript_variant;intron_variant,NMD_transcript_variant
SANAD_LRR_Joint_modelVS	chr16	78374781	drug_response	-0.503	0.502	0.00117	WWOX	intron_variant,NMD_transcript_variant;intron_variant;intron_variant,non_coding_transcript_variant
SANAD_LRR_Joint_modelVS	chr16	78374781	drug_response	-0.503	0.502	0.00117	WWOX	intron_variant,NMD_transcript_variant;intron_variant;intron_variant,non_coding_transcript_variant
SANAD_LRR_univariate	chr16	78374781	drug_response	-0.503	0.165	0.000894	WWOX	intron_variant;intron_variant,NMD_transcript_variant;intron_variant,non_coding_transcript_variant
SANAD_LRR_univariate	chr16	78374781	drug_response	-0.503	0.165	0.000894	WWOX	intron_variant;intron_variant,NMD_transcript_variant;intron_variant,non_coding_transcript_variant
SANAD_Genotype_Joint_model	chr16	78374817	drug_response	0.473	0.215	0.189	WWOX	intron_variant,non_coding_transcript_variant;intron_variant;intron_variant,NMD_transcript_variant
SANAD_Genotype_Joint_model	chr16	78374817	drug_response	0.473	0.215	0.189	WWOX	intron_variant,non_coding_transcript_variant;intron_variant;intron_variant,NMD_transcript_variant
SANAD_Genotype_Joint_modelVS	chr16	78374817	drug_response	0.473	0.156	0.00759	WWOX	intron_variant,non_coding_transcript_variant;intron_variant,NMD_transcript_variant;intron_variant
SANAD_Genotype_Joint_modelVS	chr16	78374817	drug_response	0.473	0.156	0.0076	WWOX	intron_variant,non_coding_transcript_variant;intron_variant,NMD_transcript_variant;intron_variant
SANAD_Genotype_Univariate	chr16	78374817	drug_response	0.473	0.33	0.00771	WWOX	intron_variant,non_coding_transcript_variant;intron_variant;intron_variant,NMD_transcript_variant
SANAD_Genotype_Univariate	chr16	78374817	drug_response	0.473	0.33	0.00771	WWOX	intron_variant,non_coding_transcript_variant;intron_variant;intron_variant,NMD_transcript_variant
SANAD_LRR_Joint_model	chr16	78374817	drug_response	-0.426	0.525	0.168	WWOX	intron_variant;intron_variant,non_coding_transcript_variant;intron_variant,NMD_transcript_variant
SANAD_LRR_Joint_model	chr16	78374817	drug_response	-0.426	0.525	0.168	WWOX	intron_variant;intron_variant,non_coding_transcript_variant;intron_variant,NMD_transcript_variant
SANAD_LRR_Joint_modelVS	chr16	78374817	drug_response	-0.426	0.399	0.00159	WWOX	intron_variant,NMD_transcript_variant;intron_variant;intron_variant,non_coding_transcript_variant
SANAD_LRR_Joint_modelVS	chr16	78374817	drug_response	-0.426	0.399	0.00159	WWOX	intron_variant,NMD_transcript_variant;intron_variant;intron_variant,non_coding_transcript_variant
SANAD_LRR_univariate	chr16	78374817	drug_response	-0.426	0.193	0.00128	WWOX	intron_variant;intron_variant,NMD_transcript_variant;intron_variant,non_coding_transcript_variant
SANAD_LRR_univariate	chr16	78374817	drug_response	-0.426	0.193	0.00128	WWOX	intron_variant;intron_variant,NMD_transcript_variant;intron_variant,non_coding_transcript_variant
SANAD_Genotype_Joint_model	chr16	78374927	drug_response	0.473	0.215	0.189	WWOX	intron_variant,non_coding_transcript_variant;intron_variant;intron_variant,NMD_transcript_variant
SANAD_Genotype_Joint_model	chr16	78374927	drug_response	0.473	0.215	0.189	WWOX	intron_variant,non_coding_transcript_variant;intron_variant;intron_variant,NMD_transcript_variant
SANAD_Genotype_Joint_modelVS	chr16	78374927	drug_response	0.473	0.156	0.00761	WWOX	intron_variant,non_coding_transcript_variant;intron_variant,NMD_transcript_variant;intron_variant
SANAD_Genotype_Joint_modelVS	chr16	78374927	drug_response	0.473	0.156	0.00761	WWOX	intron_variant,non_coding_transcript_variant;intron_variant,NMD_transcript_variant;intron_variant
SANAD_Genotype_Univariate	chr16	78374927	drug_response	0.473	0.33	0.00772	WWOX	intron_variant,non_coding_transcript_variant;intron_variant;intron_variant,NMD_transcript_variant
SANAD_Genotype_Univariate	chr16	78374927	drug_response	0.473	0.33	0.00772	WWOX	intron_variant,non_coding_transcript_variant;intron_variant;intron_variant,NMD_transcript_variant
SANAD_LRR_Joint_model	chr16	78374927	drug_response	-0.657	0.839	0.184	WWOX	intron_variant;intron_variant,non_coding_transcript_variant;intron_variant,NMD_transcript_variant
SANAD_LRR_Joint_model	chr16	78374927	drug_response	-0.657	0.839	0.184	WWOX	intron_variant;intron_variant,non_coding_transcript_variant;intron_variant,NMD_transcript_variant
SANAD_LRR_Joint_modelVS	chr16	78374927	drug_response	-0.657	0.605	0.00632	WWOX	intron_variant,NMD_transcript_variant;intron_variant;intron_variant,non_coding_transcript_variant
SANAD_LRR_Joint_modelVS	chr16	78374927	drug_response	-0.657	0.605	0.00632	WWOX	intron_variant,NMD_transcript_variant;intron_variant;intron_variant,non_coding_transcript_variant
SANAD_LRR_univariate	chr16	78374927	drug_response	-0.657	0.0981	0.00525	WWOX	intron_variant;intron_variant,NMD_transcript_variant;intron_variant,non_coding_transcript_variant
SANAD_LRR_univariate	chr16	78374927	drug_response	-0.657	0.0981	0.00525	WWOX	intron_variant;intron_variant,NMD_transcript_variant;intron_variant,non_coding_transcript_variant
SANAD_LRR_Joint_model	chr16	78375031	drug_response	-0.639	0.935	0.154	WWOX	intron_variant;intron_variant,non_coding_transcript_variant;intron_variant,NMD_transcript_variant
SANAD_LRR_Joint_model	chr16	78375031	drug_response	-0.639	0.935	0.154	WWOX	intron_variant;intron_variant,non_coding_transcript_variant;intron_variant,NMD_transcript_variant
SANAD_LRR_Joint_modelVS	chr16	78375031	drug_response	-0.639	0.682	0.000902	WWOX	intron_variant,NMD_transcript_variant;intron_variant;intron_variant,non_coding_transcript_variant
SANAD_LRR_Joint_modelVS	chr16	78375031	drug_response	-0.639	0.682	0.000902	WWOX	intron_variant,NMD_transcript_variant;intron_variant;intron_variant,non_coding_transcript_variant
SANAD_LRR_univariate	chr16	78375031	drug_response	-0.639	0.128	0.000668	WWOX	intron_variant;intron_variant,NMD_transcript_variant;intron_variant,non_coding_transcript_variant
SANAD_LRR_univariate	chr16	78375031	drug_response	-0.639	0.128	0.000668	WWOX	intron_variant;intron_variant,NMD_transcript_variant;intron_variant,non_coding_transcript_variant
SANAD_LRR_Joint_model	chr16	78375121	drug_response	-0.121	0.292	0.169	WWOX	intron_variant;intron_variant,non_coding_transcript_variant;intron_variant,NMD_transcript_variant
SANAD_LRR_Joint_model	chr16	78375121	drug_response	-0.121	0.292	0.169	WWOX	intron_variant;intron_variant,non_coding_transcript_variant;intron_variant,NMD_transcript_variant
SANAD_LRR_Joint_modelVS	chr16	78375121	drug_response	-0.121	0.215	0.00239	WWOX	intron_variant,NMD_transcript_variant;intron_variant;intron_variant,non_coding_transcript_variant
SANAD_LRR_Joint_modelVS	chr16	78375121	drug_response	-0.121	0.215	0.00239	WWOX	intron_variant,NMD_transcript_variant;intron_variant;intron_variant,non_coding_transcript_variant
SANAD_LRR_univariate	chr16	78375121	drug_response	-0.121	0.328	0.00209	WWOX	intron_variant;intron_variant,NMD_transcript_variant;intron_variant,non_coding_transcript_variant
SANAD_LRR_univariate	chr16	78375121	drug_response	-0.121	0.328	0.00209	WWOX	intron_variant;intron_variant,NMD_transcript_variant;intron_variant,non_coding_transcript_variant
SANAD_LRR_Joint_model	chr16	78375226	drug_response	-0.39	0.544	0.16	WWOX	intron_variant;intron_variant,non_coding_transcript_variant;intron_variant,NMD_transcript_variant
SANAD_LRR_Joint_model	chr16	78375226	drug_response	-0.39	0.544	0.16	WWOX	intron_variant;intron_variant,non_coding_transcript_variant;intron_variant,NMD_transcript_variant
SANAD_LRR_Joint_modelVS	chr16	78375226	drug_response	-0.39	0.386	0.0019	WWOX	intron_variant,NMD_transcript_variant;intron_variant;intron_variant,non_coding_transcript_variant
SANAD_LRR_Joint_modelVS	chr16	78375226	drug_response	-0.39	0.386	0.0019	WWOX	intron_variant,NMD_transcript_variant;intron_variant;intron_variant,non_coding_transcript_variant
SANAD_LRR_univariate	chr16	78375226	drug_response	-0.39	0.194	0.00153	WWOX	intron_variant;intron_variant,NMD_transcript_variant;intron_variant,non_coding_transcript_variant
SANAD_LRR_univariate	chr16	78375226	drug_response	-0.39	0.194	0.00153	WWOX	intron_variant;intron_variant,NMD_transcript_variant;intron_variant,non_coding_transcript_variant
SANAD_LRR_Joint_model	chr16	78375478	drug_response	-0.628	0.872	0.159	WWOX	intron_variant;intron_variant,non_coding_transcript_variant;intron_variant,NMD_transcript_variant
SANAD_LRR_Joint_model	chr16	78375478	drug_response	-0.628	0.872	0.159	WWOX	intron_variant;intron_variant,non_coding_transcript_variant;intron_variant,NMD_transcript_variant
SANAD_LRR_Joint_modelVS	chr16	78375478	drug_response	-0.628	0.643	0.00118	WWOX	intron_variant,NMD_transcript_variant;intron_variant;intron_variant,non_coding_transcript_variant
SANAD_LRR_Joint_modelVS	chr16	78375478	drug_response	-0.628	0.643	0.00118	WWOX	intron_variant,NMD_transcript_variant;intron_variant;intron_variant,non_coding_transcript_variant
SANAD_LRR_univariate	chr16	78375478	drug_response	-0.628	0.129	0.00088	WWOX	intron_variant;intron_variant,NMD_transcript_variant;intron_variant,non_coding_transcript_variant
SANAD_LRR_univariate	chr16	78375478	drug_response	-0.628	0.129	0.00088	WWOX	intron_variant;intron_variant,NMD_transcript_variant;intron_variant,non_coding_transcript_variant
SANAD_Genotype_Joint_model	chr16	78376085	drug_response	0.473	0.215	0.189	WWOX	intron_variant,non_coding_transcript_variant;intron_variant;intron_variant,NMD_transcript_variant
SANAD_Genotype_Joint_model	chr16	78376085	drug_response	0.473	0.215	0.189	WWOX	intron_variant,non_coding_transcript_variant;intron_variant;intron_variant,NMD_transcript_variant
SANAD_Genotype_Joint_modelVS	chr16	78376085	drug_response	0.473	0.156	0.00761	WWOX	intron_variant,non_coding_transcript_variant;intron_variant,NMD_transcript_variant;intron_variant
SANAD_Genotype_Joint_modelVS	chr16	78376085	drug_response	0.473	0.156	0.00761	WWOX	intron_variant,non_coding_transcript_variant;intron_variant,NMD_transcript_variant;intron_variant
SANAD_Genotype_Univariate	chr16	78376085	drug_response	0.473	0.33	0.00772	WWOX	intron_variant,non_coding_transcript_variant;intron_variant;intron_variant,NMD_transcript_variant
SANAD_Genotype_Univariate	chr16	78376085	drug_response	0.473	0.33	0.00772	WWOX	intron_variant,non_coding_transcript_variant;intron_variant;intron_variant,NMD_transcript_variant
SANAD_LRR_Joint_model	chr16	78376085	drug_response	-0.598	0.885	0.15	WWOX	intron_variant;intron_variant,non_coding_transcript_variant;intron_variant,NMD_transcript_variant
SANAD_LRR_Joint_model	chr16	78376085	drug_response	-0.598	0.885	0.15	WWOX	intron_variant;intron_variant,non_coding_transcript_variant;intron_variant,NMD_transcript_variant
SANAD_LRR_Joint_modelVS	chr16	78376085	drug_response	-0.598	0.667	0.000415	WWOX	intron_variant,NMD_transcript_variant;intron_variant;intron_variant,non_coding_transcript_variant
SANAD_LRR_Joint_modelVS	chr16	78376085	drug_response	-0.598	0.667	0.000415	WWOX	intron_variant,NMD_transcript_variant;intron_variant;intron_variant,non_coding_transcript_variant
SANAD_LRR_univariate	chr16	78376085	drug_response	-0.598	0.148	0.000303	WWOX	intron_variant;intron_variant,NMD_transcript_variant;intron_variant,non_coding_transcript_variant
SANAD_LRR_univariate	chr16	78376085	drug_response	-0.598	0.148	0.000303	WWOX	intron_variant;intron_variant,NMD_transcript_variant;intron_variant,non_coding_transcript_variant
SANAD_Genotype_Joint_model	chr16	78376530	drug_response	0.473	0.215	0.189	WWOX	intron_variant,non_coding_transcript_variant;intron_variant;intron_variant,NMD_transcript_variant
SANAD_Genotype_Joint_model	chr16	78376530	drug_response	0.473	0.215	0.189	WWOX	intron_variant,non_coding_transcript_variant;intron_variant;intron_variant,NMD_transcript_variant
SANAD_Genotype_Joint_modelVS	chr16	78376530	drug_response	0.473	0.156	0.00759	WWOX	intron_variant,non_coding_transcript_variant;intron_variant,NMD_transcript_variant;intron_variant
SANAD_Genotype_Joint_modelVS	chr16	78376530	drug_response	0.473	0.156	0.0076	WWOX	intron_variant,non_coding_transcript_variant;intron_variant,NMD_transcript_variant;intron_variant
SANAD_Genotype_Univariate	chr16	78376530	drug_response	0.473	0.33	0.00771	WWOX	intron_variant,non_coding_transcript_variant;intron_variant;intron_variant,NMD_transcript_variant
SANAD_Genotype_Univariate	chr16	78376530	drug_response	0.473	0.33	0.00771	WWOX	intron_variant,non_coding_transcript_variant;intron_variant;intron_variant,NMD_transcript_variant
SANAD_LRR_Joint_model	chr16	78376530	drug_response	-0.649	0.951	0.163	WWOX	intron_variant;intron_variant,non_coding_transcript_variant;intron_variant,NMD_transcript_variant
SANAD_LRR_Joint_model	chr16	78376530	drug_response	-0.649	0.951	0.163	WWOX	intron_variant;intron_variant,non_coding_transcript_variant;intron_variant,NMD_transcript_variant
SANAD_LRR_Joint_modelVS	chr16	78376530	drug_response	-0.649	0.705	0.00145	WWOX	intron_variant,NMD_transcript_variant;intron_variant;intron_variant,non_coding_transcript_variant
SANAD_LRR_Joint_modelVS	chr16	78376530	drug_response	-0.649	0.705	0.00145	WWOX	intron_variant,NMD_transcript_variant;intron_variant;intron_variant,non_coding_transcript_variant
SANAD_LRR_univariate	chr16	78376530	drug_response	-0.649	0.113	0.00113	WWOX	intron_variant;intron_variant,NMD_transcript_variant;intron_variant,non_coding_transcript_variant
SANAD_LRR_univariate	chr16	78376530	drug_response	-0.649	0.113	0.00113	WWOX	intron_variant;intron_variant,NMD_transcript_variant;intron_variant,non_coding_transcript_variant
SANAD_Genotype_Joint_model	chr16	78377053	drug_response	0.473	0.215	0.189	WWOX	intron_variant,non_coding_transcript_variant;intron_variant;intron_variant,NMD_transcript_variant
SANAD_Genotype_Joint_model	chr16	78377053	drug_response	0.473	0.215	0.189	WWOX	intron_variant,non_coding_transcript_variant;intron_variant;intron_variant,NMD_transcript_variant
SANAD_Genotype_Joint_modelVS	chr16	78377053	drug_response	0.473	0.156	0.00758	WWOX	intron_variant,non_coding_transcript_variant;intron_variant,NMD_transcript_variant;intron_variant
SANAD_Genotype_Joint_modelVS	chr16	78377053	drug_response	0.473	0.156	0.00759	WWOX	intron_variant,non_coding_transcript_variant;intron_variant,NMD_transcript_variant;intron_variant
SANAD_Genotype_Univariate	chr16	78377053	drug_response	0.473	0.33	0.0077	WWOX	intron_variant,non_coding_transcript_variant;intron_variant;intron_variant,NMD_transcript_variant
SANAD_Genotype_Univariate	chr16	78377053	drug_response	0.473	0.33	0.0077	WWOX	intron_variant,non_coding_transcript_variant;intron_variant;intron_variant,NMD_transcript_variant
SANAD_LRR_Joint_model	chr16	78377053	drug_response	-0.459	0.67	0.151	WWOX	intron_variant;intron_variant,non_coding_transcript_variant;intron_variant,NMD_transcript_variant
SANAD_LRR_Joint_model	chr16	78377053	drug_response	-0.459	0.67	0.151	WWOX	intron_variant;intron_variant,non_coding_transcript_variant;intron_variant,NMD_transcript_variant
SANAD_LRR_Joint_modelVS	chr16	78377053	drug_response	-0.459	0.509	0.00043	WWOX	intron_variant,NMD_transcript_variant;intron_variant;intron_variant,non_coding_transcript_variant
SANAD_LRR_Joint_modelVS	chr16	78377053	drug_response	-0.459	0.509	0.00043	WWOX	intron_variant,NMD_transcript_variant;intron_variant;intron_variant,non_coding_transcript_variant
SANAD_LRR_univariate	chr16	78377053	drug_response	-0.459	0.192	0.00031	WWOX	intron_variant;intron_variant,NMD_transcript_variant;intron_variant,non_coding_transcript_variant
SANAD_LRR_univariate	chr16	78377053	drug_response	-0.459	0.192	0.00031	WWOX	intron_variant;intron_variant,NMD_transcript_variant;intron_variant,non_coding_transcript_variant
SANAD_Genotype_Joint_model	chr16	78377415	drug_response	0.473	0.215	0.189	WWOX	intron_variant,non_coding_transcript_variant;intron_variant;intron_variant,NMD_transcript_variant
SANAD_Genotype_Joint_model	chr16	78377415	drug_response	0.473	0.215	0.189	WWOX	intron_variant,non_coding_transcript_variant;intron_variant;intron_variant,NMD_transcript_variant
SANAD_Genotype_Joint_modelVS	chr16	78377415	drug_response	0.473	0.156	0.00761	WWOX	intron_variant,non_coding_transcript_variant;intron_variant,NMD_transcript_variant;intron_variant
SANAD_Genotype_Joint_modelVS	chr16	78377415	drug_response	0.473	0.156	0.00761	WWOX	intron_variant,non_coding_transcript_variant;intron_variant,NMD_transcript_variant;intron_variant
SANAD_Genotype_Univariate	chr16	78377415	drug_response	0.473	0.33	0.00772	WWOX	intron_variant,non_coding_transcript_variant;intron_variant;intron_variant,NMD_transcript_variant
SANAD_Genotype_Univariate	chr16	78377415	drug_response	0.473	0.33	0.00772	WWOX	intron_variant,non_coding_transcript_variant;intron_variant;intron_variant,NMD_transcript_variant
SANAD_LRR_Joint_model	chr16	78377415	drug_response	-0.44	0.615	0.156	WWOX	intron_variant;intron_variant,non_coding_transcript_variant;intron_variant,NMD_transcript_variant
SANAD_LRR_Joint_model	chr16	78377415	drug_response	-0.44	0.615	0.156	WWOX	intron_variant;intron_variant,non_coding_transcript_variant;intron_variant,NMD_transcript_variant
SANAD_LRR_Joint_modelVS	chr16	78377415	drug_response	-0.44	0.457	0.000825	WWOX	intron_variant,NMD_transcript_variant;intron_variant;intron_variant,non_coding_transcript_variant
SANAD_LRR_Joint_modelVS	chr16	78377415	drug_response	-0.44	0.457	0.000825	WWOX	intron_variant,NMD_transcript_variant;intron_variant;intron_variant,non_coding_transcript_variant
SANAD_LRR_univariate	chr16	78377415	drug_response	-0.44	0.193	0.000634	WWOX	intron_variant;intron_variant,NMD_transcript_variant;intron_variant,non_coding_transcript_variant
SANAD_LRR_univariate	chr16	78377415	drug_response	-0.44	0.193	0.000634	WWOX	intron_variant;intron_variant,NMD_transcript_variant;intron_variant,non_coding_transcript_variant
SANAD_Genotype_Joint_model	chr16	78377996	drug_response	0.473	0.215	0.189	WWOX	intron_variant,non_coding_transcript_variant;intron_variant;intron_variant,NMD_transcript_variant
SANAD_Genotype_Joint_model	chr16	78377996	drug_response	0.473	0.215	0.189	WWOX	intron_variant,non_coding_transcript_variant;intron_variant;intron_variant,NMD_transcript_variant
SANAD_Genotype_Joint_modelVS	chr16	78377996	drug_response	0.473	0.157	0.00754	WWOX	intron_variant,non_coding_transcript_variant;intron_variant,NMD_transcript_variant;intron_variant
SANAD_Genotype_Joint_modelVS	chr16	78377996	drug_response	0.473	0.157	0.00756	WWOX	intron_variant,non_coding_transcript_variant;intron_variant,NMD_transcript_variant;intron_variant
SANAD_Genotype_Univariate	chr16	78377996	drug_response	0.473	0.331	0.00765	WWOX	intron_variant,non_coding_transcript_variant;intron_variant;intron_variant,NMD_transcript_variant
SANAD_Genotype_Univariate	chr16	78377996	drug_response	0.473	0.33	0.00767	WWOX	intron_variant,non_coding_transcript_variant;intron_variant;intron_variant,NMD_transcript_variant
SANAD_LRR_Joint_model	chr16	78377996	drug_response	-0.481	0.673	0.157	WWOX	intron_variant;intron_variant,non_coding_transcript_variant;intron_variant,NMD_transcript_variant
SANAD_LRR_Joint_model	chr16	78377996	drug_response	-0.481	0.673	0.157	WWOX	intron_variant;intron_variant,non_coding_transcript_variant;intron_variant,NMD_transcript_variant
SANAD_LRR_Joint_modelVS	chr16	78377996	drug_response	-0.481	0.505	0.000815	WWOX	intron_variant,NMD_transcript_variant;intron_variant;intron_variant,non_coding_transcript_variant
SANAD_LRR_Joint_modelVS	chr16	78377996	drug_response	-0.481	0.505	0.000815	WWOX	intron_variant,NMD_transcript_variant;intron_variant;intron_variant,non_coding_transcript_variant
SANAD_LRR_univariate	chr16	78377996	drug_response	-0.481	0.175	0.000607	WWOX	intron_variant;intron_variant,NMD_transcript_variant;intron_variant,non_coding_transcript_variant
SANAD_LRR_univariate	chr16	78377996	drug_response	-0.481	0.175	0.000607	WWOX	intron_variant;intron_variant,NMD_transcript_variant;intron_variant,non_coding_transcript_variant
SANAD_Genotype_Joint_model	chr16	78378551	drug_response	0.473	0.218	0.187	WWOX	intron_variant,non_coding_transcript_variant;intron_variant;intron_variant,NMD_transcript_variant
SANAD_Genotype_Joint_model	chr16	78378551	drug_response	0.473	0.218	0.187	WWOX	intron_variant,non_coding_transcript_variant;intron_variant;intron_variant,NMD_transcript_variant
SANAD_Genotype_Joint_modelVS	chr16	78378551	drug_response	0.473	0.158	0.00708	WWOX	intron_variant,non_coding_transcript_variant;intron_variant,NMD_transcript_variant;intron_variant
SANAD_Genotype_Joint_modelVS	chr16	78378551	drug_response	0.473	0.157	0.00712	WWOX	intron_variant,non_coding_transcript_variant;intron_variant,NMD_transcript_variant;intron_variant
SANAD_Genotype_Univariate	chr16	78378551	drug_response	0.473	0.334	0.00718	WWOX	intron_variant,non_coding_transcript_variant;intron_variant;intron_variant,NMD_transcript_variant
SANAD_Genotype_Univariate	chr16	78378551	drug_response	0.473	0.333	0.00722	WWOX	intron_variant,non_coding_transcript_variant;intron_variant;intron_variant,NMD_transcript_variant
SANAD_LRR_Joint_model	chr16	78378551	drug_response	-0.451	0.566	0.166	WWOX	intron_variant;intron_variant,non_coding_transcript_variant;intron_variant,NMD_transcript_variant
SANAD_LRR_Joint_model	chr16	78378551	drug_response	-0.451	0.566	0.166	WWOX	intron_variant;intron_variant,non_coding_transcript_variant;intron_variant,NMD_transcript_variant
SANAD_LRR_Joint_modelVS	chr16	78378551	drug_response	-0.451	0.434	0.00126	WWOX	intron_variant,NMD_transcript_variant;intron_variant;intron_variant,non_coding_transcript_variant
SANAD_LRR_Joint_modelVS	chr16	78378551	drug_response	-0.451	0.434	0.00126	WWOX	intron_variant,NMD_transcript_variant;intron_variant;intron_variant,non_coding_transcript_variant
SANAD_LRR_univariate	chr16	78378551	drug_response	-0.451	0.186	0.000981	WWOX	intron_variant;intron_variant,NMD_transcript_variant;intron_variant,non_coding_transcript_variant
SANAD_LRR_univariate	chr16	78378551	drug_response	-0.451	0.186	0.000981	WWOX	intron_variant;intron_variant,NMD_transcript_variant;intron_variant,non_coding_transcript_variant
SANAD_Genotype_Joint_model	chr16	78379045	drug_response	0.473	0.215	0.189	WWOX	intron_variant,non_coding_transcript_variant;intron_variant;intron_variant,NMD_transcript_variant
SANAD_Genotype_Joint_model	chr16	78379045	drug_response	0.473	0.215	0.189	WWOX	intron_variant,non_coding_transcript_variant;intron_variant;intron_variant,NMD_transcript_variant
SANAD_Genotype_Joint_modelVS	chr16	78379045	drug_response	0.473	0.156	0.00759	WWOX	intron_variant,non_coding_transcript_variant;intron_variant,NMD_transcript_variant;intron_variant
SANAD_Genotype_Joint_modelVS	chr16	78379045	drug_response	0.473	0.156	0.00759	WWOX	intron_variant,non_coding_transcript_variant;intron_variant,NMD_transcript_variant;intron_variant
SANAD_Genotype_Univariate	chr16	78379045	drug_response	0.473	0.33	0.0077	WWOX	intron_variant,non_coding_transcript_variant;intron_variant;intron_variant,NMD_transcript_variant
SANAD_Genotype_Univariate	chr16	78379045	drug_response	0.473	0.33	0.00771	WWOX	intron_variant,non_coding_transcript_variant;intron_variant;intron_variant,NMD_transcript_variant
SANAD_LRR_Joint_model	chr16	78379045	drug_response	-0.445	0.601	0.16	WWOX	intron_variant;intron_variant,non_coding_transcript_variant;intron_variant,NMD_transcript_variant
SANAD_LRR_Joint_model	chr16	78379045	drug_response	-0.445	0.601	0.16	WWOX	intron_variant;intron_variant,non_coding_transcript_variant;intron_variant,NMD_transcript_variant
SANAD_LRR_Joint_modelVS	chr16	78379045	drug_response	-0.445	0.474	0.000586	WWOX	intron_variant,NMD_transcript_variant;intron_variant;intron_variant,non_coding_transcript_variant
SANAD_LRR_Joint_modelVS	chr16	78379045	drug_response	-0.445	0.474	0.000586	WWOX	intron_variant,NMD_transcript_variant;intron_variant;intron_variant,non_coding_transcript_variant
SANAD_LRR_univariate	chr16	78379045	drug_response	-0.445	0.195	0.000443	WWOX	intron_variant;intron_variant,NMD_transcript_variant;intron_variant,non_coding_transcript_variant
SANAD_LRR_univariate	chr16	78379045	drug_response	-0.445	0.195	0.000443	WWOX	intron_variant;intron_variant,NMD_transcript_variant;intron_variant,non_coding_transcript_variant
SANAD_Genotype_Joint_model	chr16	78379570	drug_response	0.473	0.215	0.189	WWOX	intron_variant,non_coding_transcript_variant;intron_variant;intron_variant,NMD_transcript_variant
SANAD_Genotype_Joint_model	chr16	78379570	drug_response	0.473	0.215	0.189	WWOX	intron_variant,non_coding_transcript_variant;intron_variant;intron_variant,NMD_transcript_variant
SANAD_Genotype_Joint_modelVS	chr16	78379570	drug_response	0.473	0.156	0.00761	WWOX	intron_variant,non_coding_transcript_variant;intron_variant,NMD_transcript_variant;intron_variant
SANAD_Genotype_Joint_modelVS	chr16	78379570	drug_response	0.473	0.156	0.00761	WWOX	intron_variant,non_coding_transcript_variant;intron_variant,NMD_transcript_variant;intron_variant
SANAD_Genotype_Univariate	chr16	78379570	drug_response	0.473	0.33	0.00772	WWOX	intron_variant,non_coding_transcript_variant;intron_variant;intron_variant,NMD_transcript_variant
SANAD_Genotype_Univariate	chr16	78379570	drug_response	0.473	0.33	0.00772	WWOX	intron_variant,non_coding_transcript_variant;intron_variant;intron_variant,NMD_transcript_variant
SANAD_LRR_Joint_model	chr16	78379570	drug_response	-0.422	0.583	0.151	WWOX	intron_variant;intron_variant,non_coding_transcript_variant;intron_variant,NMD_transcript_variant
SANAD_LRR_Joint_model	chr16	78379570	drug_response	-0.422	0.583	0.151	WWOX	intron_variant;intron_variant,non_coding_transcript_variant;intron_variant,NMD_transcript_variant
SANAD_LRR_Joint_modelVS	chr16	78379570	drug_response	-0.422	0.453	0.000316	WWOX	intron_variant,NMD_transcript_variant;intron_variant;intron_variant,non_coding_transcript_variant
SANAD_LRR_Joint_modelVS	chr16	78379570	drug_response	-0.422	0.453	0.000316	WWOX	intron_variant,NMD_transcript_variant;intron_variant;intron_variant,non_coding_transcript_variant
SANAD_LRR_univariate	chr16	78379570	drug_response	-0.422	0.226	0.000235	WWOX	intron_variant;intron_variant,NMD_transcript_variant;intron_variant,non_coding_transcript_variant
SANAD_LRR_univariate	chr16	78379570	drug_response	-0.422	0.226	0.000235	WWOX	intron_variant;intron_variant,NMD_transcript_variant;intron_variant,non_coding_transcript_variant
SANAD_Genotype_Joint_model	chr16	78379879	drug_response	0.473	0.215	0.189	WWOX	intron_variant,non_coding_transcript_variant;intron_variant;intron_variant,NMD_transcript_variant
SANAD_Genotype_Joint_model	chr16	78379879	drug_response	0.473	0.215	0.189	WWOX	intron_variant,non_coding_transcript_variant;intron_variant;intron_variant,NMD_transcript_variant
SANAD_Genotype_Joint_modelVS	chr16	78379879	drug_response	0.473	0.156	0.00761	WWOX	intron_variant,non_coding_transcript_variant;intron_variant,NMD_transcript_variant;intron_variant
SANAD_Genotype_Joint_modelVS	chr16	78379879	drug_response	0.473	0.156	0.00761	WWOX	intron_variant,non_coding_transcript_variant;intron_variant,NMD_transcript_variant;intron_variant
SANAD_Genotype_Univariate	chr16	78379879	drug_response	0.473	0.33	0.00772	WWOX	intron_variant,non_coding_transcript_variant;intron_variant;intron_variant,NMD_transcript_variant
SANAD_Genotype_Univariate	chr16	78379879	drug_response	0.473	0.33	0.00772	WWOX	intron_variant,non_coding_transcript_variant;intron_variant;intron_variant,NMD_transcript_variant
SANAD_LRR_Joint_model	chr16	78379879	drug_response	-0.476	0.666	0.155	WWOX	intron_variant;intron_variant,non_coding_transcript_variant;intron_variant,NMD_transcript_variant
SANAD_LRR_Joint_model	chr16	78379879	drug_response	-0.476	0.666	0.155	WWOX	intron_variant;intron_variant,non_coding_transcript_variant;intron_variant,NMD_transcript_variant
SANAD_LRR_Joint_modelVS	chr16	78379879	drug_response	-0.476	0.492	0.000839	WWOX	intron_variant,NMD_transcript_variant;intron_variant;intron_variant,non_coding_transcript_variant
SANAD_LRR_Joint_modelVS	chr16	78379879	drug_response	-0.476	0.492	0.000839	WWOX	intron_variant,NMD_transcript_variant;intron_variant;intron_variant,non_coding_transcript_variant
SANAD_LRR_univariate	chr16	78379879	drug_response	-0.476	0.177	0.000647	WWOX	intron_variant;intron_variant,NMD_transcript_variant;intron_variant,non_coding_transcript_variant
SANAD_LRR_univariate	chr16	78379879	drug_response	-0.476	0.177	0.000647	WWOX	intron_variant;intron_variant,NMD_transcript_variant;intron_variant,non_coding_transcript_variant
SANAD_Genotype_Joint_model	chr16	78380405	drug_response	0.473	0.215	0.189	WWOX	intron_variant,non_coding_transcript_variant;intron_variant;intron_variant,NMD_transcript_variant
SANAD_Genotype_Joint_model	chr16	78380405	drug_response	0.473	0.215	0.189	WWOX	intron_variant,non_coding_transcript_variant;intron_variant;intron_variant,NMD_transcript_variant
SANAD_Genotype_Joint_modelVS	chr16	78380405	drug_response	0.473	0.156	0.00761	WWOX	intron_variant,non_coding_transcript_variant;intron_variant,NMD_transcript_variant;intron_variant
SANAD_Genotype_Joint_modelVS	chr16	78380405	drug_response	0.473	0.156	0.00761	WWOX	intron_variant,non_coding_transcript_variant;intron_variant,NMD_transcript_variant;intron_variant
SANAD_Genotype_Univariate	chr16	78380405	drug_response	0.473	0.33	0.00772	WWOX	intron_variant,non_coding_transcript_variant;intron_variant;intron_variant,NMD_transcript_variant
SANAD_Genotype_Univariate	chr16	78380405	drug_response	0.473	0.33	0.00772	WWOX	intron_variant,non_coding_transcript_variant;intron_variant;intron_variant,NMD_transcript_variant
SANAD_LRR_Joint_model	chr16	78380405	drug_response	-0.414	0.557	0.16	WWOX	intron_variant;intron_variant,non_coding_transcript_variant;intron_variant,NMD_transcript_variant
SANAD_LRR_Joint_model	chr16	78380405	drug_response	-0.414	0.557	0.16	WWOX	intron_variant;intron_variant,non_coding_transcript_variant;intron_variant,NMD_transcript_variant
SANAD_LRR_Joint_modelVS	chr16	78380405	drug_response	-0.414	0.446	0.000427	WWOX	intron_variant,NMD_transcript_variant;intron_variant;intron_variant,non_coding_transcript_variant
SANAD_LRR_Joint_modelVS	chr16	78380405	drug_response	-0.414	0.446	0.000427	WWOX	intron_variant,NMD_transcript_variant;intron_variant;intron_variant,non_coding_transcript_variant
SANAD_LRR_univariate	chr16	78380405	drug_response	-0.414	0.218	0.000314	WWOX	intron_variant;intron_variant,NMD_transcript_variant;intron_variant,non_coding_transcript_variant
SANAD_LRR_univariate	chr16	78380405	drug_response	-0.414	0.218	0.000314	WWOX	intron_variant;intron_variant,NMD_transcript_variant;intron_variant,non_coding_transcript_variant
SANAD_Genotype_Joint_model	chr16	78381830	drug_response	0.473	0.215	0.189	WWOX	intron_variant,non_coding_transcript_variant;intron_variant;intron_variant,NMD_transcript_variant
SANAD_Genotype_Joint_model	chr16	78381830	drug_response	0.473	0.215	0.189	WWOX	intron_variant,non_coding_transcript_variant;intron_variant;intron_variant,NMD_transcript_variant
SANAD_Genotype_Joint_modelVS	chr16	78381830	drug_response	0.473	0.156	0.00761	WWOX	intron_variant,non_coding_transcript_variant;intron_variant,NMD_transcript_variant;intron_variant
SANAD_Genotype_Joint_modelVS	chr16	78381830	drug_response	0.473	0.156	0.00761	WWOX	intron_variant,non_coding_transcript_variant;intron_variant,NMD_transcript_variant;intron_variant
SANAD_Genotype_Univariate	chr16	78381830	drug_response	0.473	0.33	0.00772	WWOX	intron_variant,non_coding_transcript_variant;intron_variant;intron_variant,NMD_transcript_variant
SANAD_Genotype_Univariate	chr16	78381830	drug_response	0.473	0.33	0.00772	WWOX	intron_variant,non_coding_transcript_variant;intron_variant;intron_variant,NMD_transcript_variant
SANAD_LRR_Joint_model	chr16	78381830	drug_response	-0.666	0.858	0.173	WWOX	intron_variant;intron_variant,non_coding_transcript_variant;intron_variant,NMD_transcript_variant
SANAD_LRR_Joint_model	chr16	78381830	drug_response	-0.666	0.858	0.173	WWOX	intron_variant;intron_variant,non_coding_transcript_variant;intron_variant,NMD_transcript_variant
SANAD_LRR_Joint_modelVS	chr16	78381830	drug_response	-0.666	0.665	0.00172	WWOX	intron_variant,NMD_transcript_variant;intron_variant;intron_variant,non_coding_transcript_variant
SANAD_LRR_Joint_modelVS	chr16	78381830	drug_response	-0.666	0.665	0.00172	WWOX	intron_variant,NMD_transcript_variant;intron_variant;intron_variant,non_coding_transcript_variant
SANAD_LRR_univariate	chr16	78381830	drug_response	-0.666	0.125	0.00118	WWOX	intron_variant;intron_variant,NMD_transcript_variant;intron_variant,non_coding_transcript_variant
SANAD_LRR_univariate	chr16	78381830	drug_response	-0.666	0.125	0.00118	WWOX	intron_variant;intron_variant,NMD_transcript_variant;intron_variant,non_coding_transcript_variant
SANAD_Genotype_Joint_model	chr16	78382308	drug_response	0.473	0.215	0.189	WWOX	intron_variant,non_coding_transcript_variant;intron_variant;intron_variant,NMD_transcript_variant
SANAD_Genotype_Joint_model	chr16	78382308	drug_response	0.473	0.215	0.189	WWOX	intron_variant,non_coding_transcript_variant;intron_variant;intron_variant,NMD_transcript_variant
SANAD_Genotype_Joint_modelVS	chr16	78382308	drug_response	0.473	0.156	0.00761	WWOX	intron_variant,non_coding_transcript_variant;intron_variant,NMD_transcript_variant;intron_variant
SANAD_Genotype_Joint_modelVS	chr16	78382308	drug_response	0.473	0.156	0.00761	WWOX	intron_variant,non_coding_transcript_variant;intron_variant,NMD_transcript_variant;intron_variant
SANAD_Genotype_Univariate	chr16	78382308	drug_response	0.473	0.33	0.00772	WWOX	intron_variant,non_coding_transcript_variant;intron_variant;intron_variant,NMD_transcript_variant
SANAD_Genotype_Univariate	chr16	78382308	drug_response	0.473	0.33	0.00772	WWOX	intron_variant,non_coding_transcript_variant;intron_variant;intron_variant,NMD_transcript_variant
SANAD_LRR_Joint_model	chr16	78382308	drug_response	-0.377	0.361	0.187	WWOX	intron_variant;intron_variant,non_coding_transcript_variant;intron_variant,NMD_transcript_variant
SANAD_LRR_Joint_model	chr16	78382308	drug_response	-0.377	0.361	0.187	WWOX	intron_variant;intron_variant,non_coding_transcript_variant;intron_variant,NMD_transcript_variant
SANAD_LRR_Joint_modelVS	chr16	78382308	drug_response	-0.377	0.254	0.00903	WWOX	intron_variant,NMD_transcript_variant;intron_variant;intron_variant,non_coding_transcript_variant
SANAD_LRR_Joint_modelVS	chr16	78382308	drug_response	-0.377	0.254	0.00903	WWOX	intron_variant,NMD_transcript_variant;intron_variant;intron_variant,non_coding_transcript_variant
SANAD_LRR_univariate	chr16	78382308	drug_response	-0.377	0.205	0.00789	WWOX	intron_variant;intron_variant,NMD_transcript_variant;intron_variant,non_coding_transcript_variant
SANAD_LRR_univariate	chr16	78382308	drug_response	-0.377	0.205	0.00789	WWOX	intron_variant;intron_variant,NMD_transcript_variant;intron_variant,non_coding_transcript_variant
SANAD_Genotype_Joint_model	chr16	78382879	drug_response	0.473	0.215	0.189	WWOX	intron_variant,non_coding_transcript_variant;intron_variant;intron_variant,NMD_transcript_variant
SANAD_Genotype_Joint_model	chr16	78382879	drug_response	0.473	0.215	0.189	WWOX	intron_variant,non_coding_transcript_variant;intron_variant;intron_variant,NMD_transcript_variant
SANAD_Genotype_Joint_modelVS	chr16	78382879	drug_response	0.473	0.156	0.00761	WWOX	intron_variant,non_coding_transcript_variant;intron_variant,NMD_transcript_variant;intron_variant
SANAD_Genotype_Joint_modelVS	chr16	78382879	drug_response	0.473	0.156	0.00761	WWOX	intron_variant,non_coding_transcript_variant;intron_variant,NMD_transcript_variant;intron_variant
SANAD_Genotype_Univariate	chr16	78382879	drug_response	0.473	0.33	0.00772	WWOX	intron_variant,non_coding_transcript_variant;intron_variant;intron_variant,NMD_transcript_variant
SANAD_Genotype_Univariate	chr16	78382879	drug_response	0.473	0.33	0.00772	WWOX	intron_variant,non_coding_transcript_variant;intron_variant;intron_variant,NMD_transcript_variant
SANAD_LRR_Joint_model	chr16	78382879	drug_response	-0.384	0.535	0.154	WWOX	intron_variant;intron_variant,non_coding_transcript_variant;intron_variant,NMD_transcript_variant
SANAD_LRR_Joint_model	chr16	78382879	drug_response	-0.384	0.535	0.154	WWOX	intron_variant;intron_variant,non_coding_transcript_variant;intron_variant,NMD_transcript_variant
SANAD_LRR_Joint_modelVS	chr16	78382879	drug_response	-0.384	0.411	0.000466	WWOX	intron_variant,NMD_transcript_variant;intron_variant;intron_variant,non_coding_transcript_variant
SANAD_LRR_Joint_modelVS	chr16	78382879	drug_response	-0.384	0.411	0.000466	WWOX	intron_variant,NMD_transcript_variant;intron_variant;intron_variant,non_coding_transcript_variant
SANAD_LRR_univariate	chr16	78382879	drug_response	-0.384	0.235	0.000335	WWOX	intron_variant;intron_variant,NMD_transcript_variant;intron_variant,non_coding_transcript_variant
SANAD_LRR_univariate	chr16	78382879	drug_response	-0.384	0.235	0.000335	WWOX	intron_variant;intron_variant,NMD_transcript_variant;intron_variant,non_coding_transcript_variant
SANAD_Genotype_Joint_model	chr16	78382991	drug_response	0.473	0.215	0.189	WWOX	intron_variant,non_coding_transcript_variant;intron_variant;intron_variant,NMD_transcript_variant
SANAD_Genotype_Joint_model	chr16	78382991	drug_response	0.473	0.215	0.189	WWOX	intron_variant,non_coding_transcript_variant;intron_variant;intron_variant,NMD_transcript_variant
SANAD_Genotype_Joint_modelVS	chr16	78382991	drug_response	0.473	0.156	0.00761	WWOX	intron_variant,non_coding_transcript_variant;intron_variant,NMD_transcript_variant;intron_variant
SANAD_Genotype_Joint_modelVS	chr16	78382991	drug_response	0.473	0.156	0.00761	WWOX	intron_variant,non_coding_transcript_variant;intron_variant,NMD_transcript_variant;intron_variant
SANAD_Genotype_Univariate	chr16	78382991	drug_response	0.473	0.33	0.00772	WWOX	intron_variant,non_coding_transcript_variant;intron_variant;intron_variant,NMD_transcript_variant
SANAD_Genotype_Univariate	chr16	78382991	drug_response	0.473	0.33	0.00772	WWOX	intron_variant,non_coding_transcript_variant;intron_variant;intron_variant,NMD_transcript_variant
SANAD_LRR_Joint_model	chr16	78382991	drug_response	-0.561	0.72	0.16	WWOX	intron_variant;intron_variant,non_coding_transcript_variant;intron_variant,NMD_transcript_variant
SANAD_LRR_Joint_model	chr16	78382991	drug_response	-0.561	0.72	0.16	WWOX	intron_variant;intron_variant,non_coding_transcript_variant;intron_variant,NMD_transcript_variant
SANAD_LRR_Joint_modelVS	chr16	78382991	drug_response	-0.561	0.537	0.00113	WWOX	intron_variant,NMD_transcript_variant;intron_variant;intron_variant,non_coding_transcript_variant
SANAD_LRR_Joint_modelVS	chr16	78382991	drug_response	-0.561	0.537	0.00113	WWOX	intron_variant,NMD_transcript_variant;intron_variant;intron_variant,non_coding_transcript_variant
SANAD_LRR_univariate	chr16	78382991	drug_response	-0.561	0.153	0.000892	WWOX	intron_variant;intron_variant,NMD_transcript_variant;intron_variant,non_coding_transcript_variant
SANAD_LRR_univariate	chr16	78382991	drug_response	-0.561	0.153	0.000892	WWOX	intron_variant;intron_variant,NMD_transcript_variant;intron_variant,non_coding_transcript_variant
SANAD_Genotype_Joint_model	chr16	78383075	drug_response	0.473	0.215	0.189	WWOX	intron_variant,non_coding_transcript_variant;intron_variant;intron_variant,NMD_transcript_variant
SANAD_Genotype_Joint_model	chr16	78383075	drug_response	0.473	0.215	0.189	WWOX	intron_variant,non_coding_transcript_variant;intron_variant;intron_variant,NMD_transcript_variant
SANAD_Genotype_Joint_modelVS	chr16	78383075	drug_response	0.473	0.156	0.00761	WWOX	intron_variant,non_coding_transcript_variant;intron_variant,NMD_transcript_variant;intron_variant
SANAD_Genotype_Joint_modelVS	chr16	78383075	drug_response	0.473	0.156	0.00761	WWOX	intron_variant,non_coding_transcript_variant;intron_variant,NMD_transcript_variant;intron_variant
SANAD_Genotype_Univariate	chr16	78383075	drug_response	0.473	0.33	0.00772	WWOX	intron_variant,non_coding_transcript_variant;intron_variant;intron_variant,NMD_transcript_variant
SANAD_Genotype_Univariate	chr16	78383075	drug_response	0.473	0.33	0.00772	WWOX	intron_variant,non_coding_transcript_variant;intron_variant;intron_variant,NMD_transcript_variant
SANAD_LRR_Joint_model	chr16	78383075	drug_response	-0.303	0.419	0.17	WWOX	intron_variant;intron_variant,non_coding_transcript_variant;intron_variant,NMD_transcript_variant
SANAD_LRR_Joint_model	chr16	78383075	drug_response	-0.303	0.419	0.17	WWOX	intron_variant;intron_variant,non_coding_transcript_variant;intron_variant,NMD_transcript_variant
SANAD_LRR_Joint_modelVS	chr16	78383075	drug_response	-0.303	0.311	0.00226	WWOX	intron_variant,NMD_transcript_variant;intron_variant;intron_variant,non_coding_transcript_variant
SANAD_LRR_Joint_modelVS	chr16	78383075	drug_response	-0.303	0.311	0.00226	WWOX	intron_variant,NMD_transcript_variant;intron_variant;intron_variant,non_coding_transcript_variant
SANAD_LRR_univariate	chr16	78383075	drug_response	-0.303	0.232	0.00187	WWOX	intron_variant;intron_variant,NMD_transcript_variant;intron_variant,non_coding_transcript_variant
SANAD_LRR_univariate	chr16	78383075	drug_response	-0.303	0.232	0.00187	WWOX	intron_variant;intron_variant,NMD_transcript_variant;intron_variant,non_coding_transcript_variant
SANAD_Genotype_Joint_model	chr16	78383140	drug_response	0.473	0.215	0.189	WWOX	intron_variant,non_coding_transcript_variant;intron_variant;intron_variant,NMD_transcript_variant
SANAD_Genotype_Joint_model	chr16	78383140	drug_response	0.473	0.215	0.189	WWOX	intron_variant,non_coding_transcript_variant;intron_variant;intron_variant,NMD_transcript_variant
SANAD_Genotype_Joint_modelVS	chr16	78383140	drug_response	0.473	0.156	0.00761	WWOX	intron_variant,non_coding_transcript_variant;intron_variant,NMD_transcript_variant;intron_variant
SANAD_Genotype_Joint_modelVS	chr16	78383140	drug_response	0.473	0.156	0.00761	WWOX	intron_variant,non_coding_transcript_variant;intron_variant,NMD_transcript_variant;intron_variant
SANAD_Genotype_Univariate	chr16	78383140	drug_response	0.473	0.33	0.00772	WWOX	intron_variant,non_coding_transcript_variant;intron_variant;intron_variant,NMD_transcript_variant
SANAD_Genotype_Univariate	chr16	78383140	drug_response	0.473	0.33	0.00772	WWOX	intron_variant,non_coding_transcript_variant;intron_variant;intron_variant,NMD_transcript_variant
SANAD_LRR_Joint_model	chr16	78383140	drug_response	-0.56	0.782	0.159	WWOX	intron_variant;intron_variant,non_coding_transcript_variant;intron_variant,NMD_transcript_variant
SANAD_LRR_Joint_model	chr16	78383140	drug_response	-0.56	0.782	0.159	WWOX	intron_variant;intron_variant,non_coding_transcript_variant;intron_variant,NMD_transcript_variant
SANAD_LRR_Joint_modelVS	chr16	78383140	drug_response	-0.56	0.582	0.00103	WWOX	intron_variant,NMD_transcript_variant;intron_variant;intron_variant,non_coding_transcript_variant
SANAD_LRR_Joint_modelVS	chr16	78383140	drug_response	-0.56	0.582	0.00103	WWOX	intron_variant,NMD_transcript_variant;intron_variant;intron_variant,non_coding_transcript_variant
SANAD_LRR_univariate	chr16	78383140	drug_response	-0.56	0.146	0.000795	WWOX	intron_variant;intron_variant,NMD_transcript_variant;intron_variant,non_coding_transcript_variant
SANAD_LRR_univariate	chr16	78383140	drug_response	-0.56	0.146	0.000795	WWOX	intron_variant;intron_variant,NMD_transcript_variant;intron_variant,non_coding_transcript_variant
SANAD_LRR_Joint_model	chr16	78383306	drug_response	-0.356	0.478	0.164	WWOX	intron_variant;intron_variant,non_coding_transcript_variant;intron_variant,NMD_transcript_variant
SANAD_LRR_Joint_model	chr16	78383306	drug_response	-0.356	0.478	0.164	WWOX	intron_variant;intron_variant,non_coding_transcript_variant;intron_variant,NMD_transcript_variant
SANAD_LRR_Joint_modelVS	chr16	78383306	drug_response	-0.356	0.359	0.00143	WWOX	intron_variant,NMD_transcript_variant;intron_variant;intron_variant,non_coding_transcript_variant
SANAD_LRR_Joint_modelVS	chr16	78383306	drug_response	-0.356	0.359	0.00143	WWOX	intron_variant,NMD_transcript_variant;intron_variant;intron_variant,non_coding_transcript_variant
SANAD_LRR_univariate	chr16	78383306	drug_response	-0.356	0.223	0.00111	WWOX	intron_variant;intron_variant,NMD_transcript_variant;intron_variant,non_coding_transcript_variant
SANAD_LRR_univariate	chr16	78383306	drug_response	-0.356	0.223	0.00111	WWOX	intron_variant;intron_variant,NMD_transcript_variant;intron_variant,non_coding_transcript_variant
SANAD_LRR_Joint_model	chr16	78383363	drug_response	-0.515	0.777	0.147	WWOX	intron_variant;intron_variant,non_coding_transcript_variant;intron_variant,NMD_transcript_variant
SANAD_LRR_Joint_model	chr16	78383363	drug_response	-0.515	0.777	0.147	WWOX	intron_variant;intron_variant,non_coding_transcript_variant;intron_variant,NMD_transcript_variant
SANAD_LRR_Joint_modelVS	chr16	78383363	drug_response	-0.515	0.598	0.000248	WWOX	intron_variant,NMD_transcript_variant;intron_variant;intron_variant,non_coding_transcript_variant
SANAD_LRR_Joint_modelVS	chr16	78383363	drug_response	-0.515	0.598	0.000248	WWOX	intron_variant,NMD_transcript_variant;intron_variant;intron_variant,non_coding_transcript_variant
SANAD_LRR_univariate	chr16	78383363	drug_response	-0.515	0.178	0.000168	WWOX	intron_variant;intron_variant,NMD_transcript_variant;intron_variant,non_coding_transcript_variant
SANAD_LRR_univariate	chr16	78383363	drug_response	-0.515	0.178	0.000168	WWOX	intron_variant;intron_variant,NMD_transcript_variant;intron_variant,non_coding_transcript_variant
SANAD_LRR_Joint_model	chr16	78383414	drug_response	-0.442	0.562	0.163	WWOX	intron_variant;intron_variant,non_coding_transcript_variant;intron_variant,NMD_transcript_variant
SANAD_LRR_Joint_model	chr16	78383414	drug_response	-0.442	0.562	0.163	WWOX	intron_variant;intron_variant,non_coding_transcript_variant;intron_variant,NMD_transcript_variant
SANAD_LRR_Joint_modelVS	chr16	78383414	drug_response	-0.442	0.429	0.00108	WWOX	intron_variant,NMD_transcript_variant;intron_variant;intron_variant,non_coding_transcript_variant
SANAD_LRR_Joint_modelVS	chr16	78383414	drug_response	-0.442	0.429	0.00108	WWOX	intron_variant,NMD_transcript_variant;intron_variant;intron_variant,non_coding_transcript_variant
SANAD_LRR_univariate	chr16	78383414	drug_response	-0.442	0.193	0.00086	WWOX	intron_variant;intron_variant,NMD_transcript_variant;intron_variant,non_coding_transcript_variant
SANAD_LRR_univariate	chr16	78383414	drug_response	-0.442	0.193	0.00086	WWOX	intron_variant;intron_variant,NMD_transcript_variant;intron_variant,non_coding_transcript_variant
SANAD_Genotype_Joint_model	chr16	78383463	drug_response	0.473	0.215	0.189	WWOX	intron_variant,non_coding_transcript_variant;intron_variant;intron_variant,NMD_transcript_variant
SANAD_Genotype_Joint_model	chr16	78383463	drug_response	0.473	0.215	0.189	WWOX	intron_variant,non_coding_transcript_variant;intron_variant;intron_variant,NMD_transcript_variant
SANAD_Genotype_Joint_modelVS	chr16	78383463	drug_response	0.473	0.156	0.00761	WWOX	intron_variant,non_coding_transcript_variant;intron_variant,NMD_transcript_variant;intron_variant
SANAD_Genotype_Joint_modelVS	chr16	78383463	drug_response	0.473	0.156	0.00761	WWOX	intron_variant,non_coding_transcript_variant;intron_variant,NMD_transcript_variant;intron_variant
SANAD_Genotype_Univariate	chr16	78383463	drug_response	0.473	0.33	0.00772	WWOX	intron_variant,non_coding_transcript_variant;intron_variant;intron_variant,NMD_transcript_variant
SANAD_Genotype_Univariate	chr16	78383463	drug_response	0.473	0.33	0.00772	WWOX	intron_variant,non_coding_transcript_variant;intron_variant;intron_variant,NMD_transcript_variant
SANAD_LRR_Joint_model	chr16	78383463	drug_response	-0.618	0.894	0.174	WWOX	intron_variant;intron_variant,non_coding_transcript_variant;intron_variant,NMD_transcript_variant
SANAD_LRR_Joint_model	chr16	78383463	drug_response	-0.618	0.894	0.174	WWOX	intron_variant;intron_variant,non_coding_transcript_variant;intron_variant,NMD_transcript_variant
SANAD_LRR_Joint_modelVS	chr16	78383463	drug_response	-0.618	0.695	0.00174	WWOX	intron_variant,NMD_transcript_variant;intron_variant;intron_variant,non_coding_transcript_variant
SANAD_LRR_Joint_modelVS	chr16	78383463	drug_response	-0.618	0.695	0.00174	WWOX	intron_variant,NMD_transcript_variant;intron_variant;intron_variant,non_coding_transcript_variant
SANAD_LRR_univariate	chr16	78383463	drug_response	-0.618	0.117	0.00128	WWOX	intron_variant;intron_variant,NMD_transcript_variant;intron_variant,non_coding_transcript_variant
SANAD_LRR_univariate	chr16	78383463	drug_response	-0.618	0.117	0.00128	WWOX	intron_variant;intron_variant,NMD_transcript_variant;intron_variant,non_coding_transcript_variant
SANAD_Genotype_Joint_model	chr16	78384121	drug_response	0.473	0.215	0.189	WWOX	intron_variant,non_coding_transcript_variant;intron_variant;intron_variant,NMD_transcript_variant
SANAD_Genotype_Joint_model	chr16	78384121	drug_response	0.473	0.215	0.189	WWOX	intron_variant,non_coding_transcript_variant;intron_variant;intron_variant,NMD_transcript_variant
SANAD_Genotype_Joint_modelVS	chr16	78384121	drug_response	0.473	0.156	0.00761	WWOX	intron_variant,non_coding_transcript_variant;intron_variant,NMD_transcript_variant;intron_variant
SANAD_Genotype_Joint_modelVS	chr16	78384121	drug_response	0.473	0.156	0.00761	WWOX	intron_variant,non_coding_transcript_variant;intron_variant,NMD_transcript_variant;intron_variant
SANAD_Genotype_Univariate	chr16	78384121	drug_response	0.473	0.33	0.00772	WWOX	intron_variant,non_coding_transcript_variant;intron_variant;intron_variant,NMD_transcript_variant
SANAD_Genotype_Univariate	chr16	78384121	drug_response	0.473	0.33	0.00772	WWOX	intron_variant,non_coding_transcript_variant;intron_variant;intron_variant,NMD_transcript_variant
SANAD_LRR_Joint_model	chr16	78384121	drug_response	-0.42	0.553	0.16	WWOX	intron_variant;intron_variant,non_coding_transcript_variant;intron_variant,NMD_transcript_variant
SANAD_LRR_Joint_model	chr16	78384121	drug_response	-0.42	0.553	0.16	WWOX	intron_variant;intron_variant,non_coding_transcript_variant;intron_variant,NMD_transcript_variant
SANAD_LRR_Joint_modelVS	chr16	78384121	drug_response	-0.42	0.427	0.000757	WWOX	intron_variant,NMD_transcript_variant;intron_variant;intron_variant,non_coding_transcript_variant
SANAD_LRR_Joint_modelVS	chr16	78384121	drug_response	-0.42	0.427	0.000757	WWOX	intron_variant,NMD_transcript_variant;intron_variant;intron_variant,non_coding_transcript_variant
SANAD_LRR_univariate	chr16	78384121	drug_response	-0.42	0.209	0.000575	WWOX	intron_variant;intron_variant,NMD_transcript_variant;intron_variant,non_coding_transcript_variant
SANAD_LRR_univariate	chr16	78384121	drug_response	-0.42	0.209	0.000575	WWOX	intron_variant;intron_variant,NMD_transcript_variant;intron_variant,non_coding_transcript_variant
SANAD_Genotype_Joint_model	chr16	78386295	drug_response	0.00783	0.00188	0.844	WWOX;LSM3P5	upstream_gene_variant;intron_variant,non_coding_transcript_variant;intron_variant;intron_variant,NMD_transcript_variant
SANAD_Genotype_Joint_model	chr16	78386295	drug_response	0.00747	1.49e-05	0.999	WWOX;LSM3P5	upstream_gene_variant;intron_variant,non_coding_transcript_variant;intron_variant;intron_variant,NMD_transcript_variant
SANAD_Genotype_Univariate	chr16	78386295	drug_response	0.00783	0.436	0.689	LSM3P5;WWOX	intron_variant,non_coding_transcript_variant;intron_variant;upstream_gene_variant;intron_variant,NMD_transcript_variant
SANAD_Genotype_Univariate	chr16	78386295	drug_response	0.00747	0.139	0.908	LSM3P5;WWOX	intron_variant,non_coding_transcript_variant;intron_variant;upstream_gene_variant;intron_variant,NMD_transcript_variant
SANAD_LRR_Joint_model	chr16	78386295	drug_response	0.00179	0.00331	0.865	WWOX;LSM3P5	intron_variant;intron_variant,non_coding_transcript_variant;intron_variant,NMD_transcript_variant;upstream_gene_variant
SANAD_LRR_Joint_model	chr16	78386295	drug_response	0.00179	0.00331	0.865	WWOX;LSM3P5	intron_variant;intron_variant,non_coding_transcript_variant;intron_variant,NMD_transcript_variant;upstream_gene_variant
SANAD_LRR_univariate	chr16	78386295	drug_response	0.00179	0.125	0.814	WWOX;LSM3P5	intron_variant;intron_variant,NMD_transcript_variant;upstream_gene_variant;intron_variant,non_coding_transcript_variant
SANAD_LRR_univariate	chr16	78386295	drug_response	0.00179	0.125	0.814	WWOX;LSM3P5	intron_variant;intron_variant,NMD_transcript_variant;upstream_gene_variant;intron_variant,non_coding_transcript_variant
SANAD_Genotype_Joint_model	chr16	78390452	drug_response	0.00168	0.000688	0.625	WWOX;LSM3P5	downstream_gene_variant;intron_variant,non_coding_transcript_variant;intron_variant;intron_variant,NMD_transcript_variant
SANAD_Genotype_Joint_model	chr16	78390452	drug_response	0.00183	0.00077	0.628	WWOX;LSM3P5	downstream_gene_variant;intron_variant,non_coding_transcript_variant;intron_variant;intron_variant,NMD_transcript_variant
SANAD_Genotype_Univariate	chr16	78390452	drug_response	0.00168	5.94	0.498	LSM3P5;WWOX	intron_variant,non_coding_transcript_variant;downstream_gene_variant;intron_variant;intron_variant,NMD_transcript_variant
SANAD_Genotype_Univariate	chr16	78390452	drug_response	0.00183	5.2	0.501	LSM3P5;WWOX	intron_variant,non_coding_transcript_variant;downstream_gene_variant;intron_variant;intron_variant,NMD_transcript_variant
SANAD_LRR_Joint_model	chr16	78390452	drug_response	-0.00602	0.017	0.484	WWOX;LSM3P5	intron_variant;downstream_gene_variant;intron_variant,non_coding_transcript_variant;intron_variant,NMD_transcript_variant
SANAD_LRR_Joint_model	chr16	78390452	drug_response	-0.00602	0.017	0.484	WWOX;LSM3P5	intron_variant;downstream_gene_variant;intron_variant,non_coding_transcript_variant;intron_variant,NMD_transcript_variant
SANAD_LRR_univariate	chr16	78390452	drug_response	-0.00602	0.17	0.735	WWOX;LSM3P5	intron_variant;downstream_gene_variant;intron_variant,NMD_transcript_variant;intron_variant,non_coding_transcript_variant
SANAD_LRR_univariate	chr16	78390452	drug_response	-0.00602	0.17	0.735	WWOX;LSM3P5	intron_variant;downstream_gene_variant;intron_variant,NMD_transcript_variant;intron_variant,non_coding_transcript_variant
SANAD_LRR_Joint_model	chr16	78399266	drug_response	-0.0181	0.00241	0.877	WWOX	intron_variant;intron_variant,non_coding_transcript_variant;intron_variant,NMD_transcript_variant
SANAD_LRR_Joint_model	chr16	78399266	drug_response	-0.0181	0.00241	0.877	WWOX	intron_variant;intron_variant,non_coding_transcript_variant;intron_variant,NMD_transcript_variant
SANAD_LRR_univariate	chr16	78399266	drug_response	-0.0181	0.689	0.342	WWOX	intron_variant;intron_variant,NMD_transcript_variant;intron_variant,non_coding_transcript_variant
SANAD_LRR_univariate	chr16	78399266	drug_response	-0.0181	0.689	0.342	WWOX	intron_variant;intron_variant,NMD_transcript_variant;intron_variant,non_coding_transcript_variant
SANAD_Genotype_Joint_model	chr16	78406571	drug_response	0.00126	0.00139	0.408	WWOX	intron_variant,non_coding_transcript_variant;intron_variant;intron_variant,NMD_transcript_variant
SANAD_Genotype_Joint_model	chr16	78406571	drug_response	0.00115	0.00124	0.415	WWOX	intron_variant,non_coding_transcript_variant;intron_variant;intron_variant,NMD_transcript_variant
SANAD_Genotype_Univariate	chr16	78406571	drug_response	0.00115	23	0.109	WWOX	intron_variant,non_coding_transcript_variant;intron_variant;intron_variant,NMD_transcript_variant
SANAD_Genotype_Univariate	chr16	78406571	drug_response	0.00126	18.7	0.116	WWOX	intron_variant,non_coding_transcript_variant;intron_variant;intron_variant,NMD_transcript_variant
SANAD_LRR_Joint_model	chr16	78406571	drug_response	-0.0164	0.0115	0.478	WWOX	intron_variant;intron_variant,non_coding_transcript_variant;intron_variant,NMD_transcript_variant
SANAD_LRR_Joint_model	chr16	78406571	drug_response	-0.0164	0.0115	0.478	WWOX	intron_variant;intron_variant,non_coding_transcript_variant;intron_variant,NMD_transcript_variant
SANAD_LRR_univariate	chr16	78406571	drug_response	-0.0164	0.38	0.611	WWOX	intron_variant;intron_variant,NMD_transcript_variant;intron_variant,non_coding_transcript_variant
SANAD_LRR_univariate	chr16	78406571	drug_response	-0.0164	0.38	0.611	WWOX	intron_variant;intron_variant,NMD_transcript_variant;intron_variant,non_coding_transcript_variant
SANAD_Genotype_Joint_model	chr16	78409180	drug_response	0.000954	0.00102	0.417	WWOX	intron_variant,non_coding_transcript_variant;intron_variant;intron_variant,NMD_transcript_variant
SANAD_Genotype_Joint_model	chr16	78409180	drug_response	0.00108	0.0011	0.42	WWOX	intron_variant,non_coding_transcript_variant;intron_variant;intron_variant,NMD_transcript_variant
SANAD_Genotype_Univariate	chr16	78409180	drug_response	0.000954	138	0.0823	WWOX	intron_variant,non_coding_transcript_variant;intron_variant;intron_variant,NMD_transcript_variant
SANAD_Genotype_Univariate	chr16	78409180	drug_response	0.00108	23.3	0.117	WWOX	intron_variant,non_coding_transcript_variant;intron_variant;intron_variant,NMD_transcript_variant
SANAD_LRR_Joint_model	chr16	78409180	drug_response	-0.0045	0.00276	0.894	WWOX	intron_variant;intron_variant,non_coding_transcript_variant;intron_variant,NMD_transcript_variant
SANAD_LRR_Joint_model	chr16	78409180	drug_response	-0.0045	0.00276	0.894	WWOX	intron_variant;intron_variant,non_coding_transcript_variant;intron_variant,NMD_transcript_variant
SANAD_LRR_univariate	chr16	78409180	drug_response	-0.0045	-0.278	0.575	WWOX	intron_variant;intron_variant,NMD_transcript_variant;intron_variant,non_coding_transcript_variant
SANAD_LRR_univariate	chr16	78409180	drug_response	-0.0045	-0.278	0.575	WWOX	intron_variant;intron_variant,NMD_transcript_variant;intron_variant,non_coding_transcript_variant
SANAD_Genotype_Joint_model	chr16	78413896	drug_response	0.000742	-5.67e-05	0.459	WWOX	intron_variant,non_coding_transcript_variant;intron_variant;intron_variant,NMD_transcript_variant
SANAD_Genotype_Univariate	chr16	78413896	drug_response	0.000742	-997	0.352	WWOX	intron_variant,non_coding_transcript_variant;intron_variant;intron_variant,NMD_transcript_variant
SANAD_LRR_Joint_model	chr16	78413896	drug_response	-0.00738	-8.75e-05	0.994	WWOX	intron_variant;intron_variant,non_coding_transcript_variant;intron_variant,NMD_transcript_variant
SANAD_LRR_Joint_model	chr16	78413896	drug_response	-0.00738	-8.75e-05	0.994	WWOX	intron_variant;intron_variant,non_coding_transcript_variant;intron_variant,NMD_transcript_variant
SANAD_LRR_univariate	chr16	78413896	drug_response	-0.00738	0.0999	0.909	WWOX	intron_variant;intron_variant,NMD_transcript_variant;intron_variant,non_coding_transcript_variant
SANAD_LRR_univariate	chr16	78413896	drug_response	-0.00738	0.0999	0.909	WWOX	intron_variant;intron_variant,NMD_transcript_variant;intron_variant,non_coding_transcript_variant
SANAD_LRR_Joint_model	chr16	78415548	drug_response	-0.00717	0.00576	0.666	WWOX	intron_variant;intron_variant,non_coding_transcript_variant;intron_variant,NMD_transcript_variant
SANAD_LRR_Joint_model	chr16	78415548	drug_response	-0.00717	0.00576	0.666	WWOX	intron_variant;intron_variant,non_coding_transcript_variant;intron_variant,NMD_transcript_variant
SANAD_LRR_univariate	chr16	78415548	drug_response	-0.00717	0.296	0.717	WWOX	intron_variant;intron_variant,NMD_transcript_variant;intron_variant,non_coding_transcript_variant
SANAD_LRR_univariate	chr16	78415548	drug_response	-0.00717	0.296	0.717	WWOX	intron_variant;intron_variant,NMD_transcript_variant;intron_variant,non_coding_transcript_variant
SANAD_Genotype_Joint_model	chr16	78415638	drug_response	0.000708	-4.8e-05	0.459	WWOX	intron_variant,non_coding_transcript_variant;intron_variant;intron_variant,NMD_transcript_variant
SANAD_Genotype_Univariate	chr16	78415638	drug_response	0.000708	-1180	0.352	WWOX	intron_variant,non_coding_transcript_variant;intron_variant;intron_variant,NMD_transcript_variant
SANAD_LRR_Joint_model	chr16	78415638	drug_response	-0.00102	-0.0134	0.353	WWOX	intron_variant;intron_variant,non_coding_transcript_variant;intron_variant,NMD_transcript_variant
SANAD_LRR_Joint_model	chr16	78415638	drug_response	-0.00102	-0.0134	0.353	WWOX	intron_variant;intron_variant,non_coding_transcript_variant;intron_variant,NMD_transcript_variant
SANAD_LRR_univariate	chr16	78415638	drug_response	-0.00102	-0.647	0.508	WWOX	intron_variant;intron_variant,NMD_transcript_variant;intron_variant,non_coding_transcript_variant
SANAD_LRR_univariate	chr16	78415638	drug_response	-0.00102	-0.647	0.508	WWOX	intron_variant;intron_variant,NMD_transcript_variant;intron_variant,non_coding_transcript_variant
SANAD_Genotype_Joint_model	chr16	78417344	drug_response	0.000724	-8.76e-05	0.406	WWOX	intron_variant,non_coding_transcript_variant;intron_variant;intron_variant,NMD_transcript_variant
SANAD_Genotype_Univariate	chr16	78417344	drug_response	0.000724	-841	0.139	WWOX	intron_variant,non_coding_transcript_variant;intron_variant;intron_variant,NMD_transcript_variant
SANAD_LRR_Joint_model	chr16	78417344	drug_response	-0.0219	0.0328	0.273	WWOX	intron_variant;intron_variant,non_coding_transcript_variant;intron_variant,NMD_transcript_variant
SANAD_LRR_Joint_model	chr16	78417344	drug_response	-0.0219	0.0328	0.273	WWOX	intron_variant;intron_variant,non_coding_transcript_variant;intron_variant,NMD_transcript_variant
SANAD_LRR_univariate	chr16	78417344	drug_response	-0.0219	1.11	0.0421	WWOX	intron_variant;intron_variant,NMD_transcript_variant;intron_variant,non_coding_transcript_variant
SANAD_LRR_univariate	chr16	78417344	drug_response	-0.0219	1.11	0.0421	WWOX	intron_variant;intron_variant,NMD_transcript_variant;intron_variant,non_coding_transcript_variant
SANAD_Genotype_Joint_model	chr16	78417811	drug_response	0.000708	4.25e-05	0.527	WWOX	intron_variant,non_coding_transcript_variant;intron_variant;intron_variant,NMD_transcript_variant
SANAD_Genotype_Univariate	chr16	78417811	drug_response	0.000708	1100	0.307	WWOX	intron_variant,non_coding_transcript_variant;intron_variant;intron_variant,NMD_transcript_variant
SANAD_LRR_Joint_model	chr16	78417811	drug_response	0.00627	0.00488	0.67	WWOX	intron_variant;intron_variant,non_coding_transcript_variant;intron_variant,NMD_transcript_variant
SANAD_LRR_Joint_model	chr16	78417811	drug_response	0.00627	0.00488	0.67	WWOX	intron_variant;intron_variant,non_coding_transcript_variant;intron_variant,NMD_transcript_variant
SANAD_LRR_univariate	chr16	78417811	drug_response	0.00627	0.846	0.372	WWOX	intron_variant;intron_variant,NMD_transcript_variant;intron_variant,non_coding_transcript_variant
SANAD_LRR_univariate	chr16	78417811	drug_response	0.00627	0.846	0.372	WWOX	intron_variant;intron_variant,NMD_transcript_variant;intron_variant,non_coding_transcript_variant
SANAD_Genotype_Joint_model	chr16	78420882	drug_response	0.000716	7.12e-05	0.459	WWOX	intron_variant,non_coding_transcript_variant;intron_variant;intron_variant,NMD_transcript_variant
SANAD_Genotype_Joint_model	chr16	78420882	drug_response	0.00072	2.81e-05	0.785	WWOX	intron_variant,non_coding_transcript_variant;intron_variant;intron_variant,NMD_transcript_variant
SANAD_Genotype_Univariate	chr16	78420882	drug_response	0.000716	1250	0.153	WWOX	intron_variant,non_coding_transcript_variant;intron_variant;intron_variant,NMD_transcript_variant
SANAD_Genotype_Univariate	chr16	78420882	drug_response	0.00072	34.2	0.739	WWOX	intron_variant,non_coding_transcript_variant;intron_variant;intron_variant,NMD_transcript_variant
SANAD_LRR_Joint_model	chr16	78420882	drug_response	0.00359	-0.0184	0.45	WWOX	intron_variant;intron_variant,non_coding_transcript_variant;intron_variant,NMD_transcript_variant
SANAD_LRR_Joint_model	chr16	78420882	drug_response	0.00359	-0.0184	0.45	WWOX	intron_variant;intron_variant,non_coding_transcript_variant;intron_variant,NMD_transcript_variant
SANAD_LRR_univariate	chr16	78420882	drug_response	0.00359	-0.815	0.113	WWOX	intron_variant;intron_variant,NMD_transcript_variant;intron_variant,non_coding_transcript_variant
SANAD_LRR_univariate	chr16	78420882	drug_response	0.00359	-0.815	0.113	WWOX	intron_variant;intron_variant,NMD_transcript_variant;intron_variant,non_coding_transcript_variant
SANAD_LRR_Joint_model	chr16	78424831	drug_response	0.0118	-0.0114	0.364	WWOX	intron_variant;intron_variant,non_coding_transcript_variant;intron_variant,NMD_transcript_variant
SANAD_LRR_Joint_model	chr16	78424831	drug_response	0.0118	-0.0114	0.364	WWOX	intron_variant;intron_variant,non_coding_transcript_variant;intron_variant,NMD_transcript_variant
SANAD_LRR_univariate	chr16	78424831	drug_response	0.0118	-1.08	0.33	WWOX	intron_variant;intron_variant,NMD_transcript_variant;intron_variant,non_coding_transcript_variant
SANAD_LRR_univariate	chr16	78424831	drug_response	0.0118	-1.08	0.33	WWOX	intron_variant;intron_variant,NMD_transcript_variant;intron_variant,non_coding_transcript_variant
SANAD_LRR_Joint_model	chr16	78430702	drug_response	-0.00503	0.00537	0.712	WWOX	intron_variant;intron_variant,non_coding_transcript_variant;intron_variant,NMD_transcript_variant
SANAD_LRR_Joint_model	chr16	78430702	drug_response	-0.00503	0.00537	0.712	WWOX	intron_variant;intron_variant,non_coding_transcript_variant;intron_variant,NMD_transcript_variant
SANAD_LRR_univariate	chr16	78430702	drug_response	-0.00503	0.405	0.583	WWOX	intron_variant;intron_variant,NMD_transcript_variant;intron_variant,non_coding_transcript_variant
SANAD_LRR_univariate	chr16	78430702	drug_response	-0.00503	0.405	0.583	WWOX	intron_variant;intron_variant,NMD_transcript_variant;intron_variant,non_coding_transcript_variant
SANAD_LRR_Joint_model	chr16	78430875	drug_response	0.0153	-0.0156	0.372	WWOX	intron_variant;intron_variant,non_coding_transcript_variant;intron_variant,NMD_transcript_variant
SANAD_LRR_Joint_model	chr16	78430875	drug_response	0.0153	-0.0156	0.372	WWOX	intron_variant;intron_variant,non_coding_transcript_variant;intron_variant,NMD_transcript_variant
SANAD_LRR_univariate	chr16	78430875	drug_response	0.0153	-1.52	0.0573	WWOX	intron_variant;intron_variant,NMD_transcript_variant;intron_variant,non_coding_transcript_variant
SANAD_LRR_univariate	chr16	78430875	drug_response	0.0153	-1.52	0.0573	WWOX	intron_variant;intron_variant,NMD_transcript_variant;intron_variant,non_coding_transcript_variant
SANAD_Genotype_Joint_model	chr16	78431277	drug_response	0.000391	-0.000111	0.429	WWOX	intron_variant,non_coding_transcript_variant;intron_variant;intron_variant,NMD_transcript_variant
SANAD_Genotype_Joint_model	chr16	78431277	drug_response	0.000742	-0.000337	0.429	WWOX	intron_variant,non_coding_transcript_variant;intron_variant;intron_variant,NMD_transcript_variant
SANAD_Genotype_Univariate	chr16	78431277	drug_response	0.000391	-609	0.173	WWOX	intron_variant,non_coding_transcript_variant;intron_variant;intron_variant,NMD_transcript_variant
SANAD_Genotype_Univariate	chr16	78431277	drug_response	0.000742	-200	0.173	WWOX	intron_variant,non_coding_transcript_variant;intron_variant;intron_variant,NMD_transcript_variant
SANAD_LRR_Joint_model	chr16	78431277	drug_response	0.00331	0.00337	0.826	WWOX	intron_variant;intron_variant,non_coding_transcript_variant;intron_variant,NMD_transcript_variant
SANAD_LRR_Joint_model	chr16	78431277	drug_response	0.00331	0.00337	0.826	WWOX	intron_variant;intron_variant,non_coding_transcript_variant;intron_variant,NMD_transcript_variant
SANAD_LRR_univariate	chr16	78431277	drug_response	0.00331	0.47	0.487	WWOX	intron_variant;intron_variant,NMD_transcript_variant;intron_variant,non_coding_transcript_variant
SANAD_LRR_univariate	chr16	78431277	drug_response	0.00331	0.47	0.487	WWOX	intron_variant;intron_variant,NMD_transcript_variant;intron_variant,non_coding_transcript_variant
SANAD_LRR_Joint_model	chr16	78463512	drug_response	-0.00426	-0.00722	0.521	WWOX	intron_variant;downstream_gene_variant;intron_variant,non_coding_transcript_variant;intron_variant,NMD_transcript_variant
SANAD_LRR_Joint_model	chr16	78463512	drug_response	-0.00426	-0.00722	0.521	WWOX	intron_variant;downstream_gene_variant;intron_variant,non_coding_transcript_variant;intron_variant,NMD_transcript_variant
SANAD_LRR_univariate	chr16	78463512	drug_response	-0.00426	-0.892	0.399	WWOX	intron_variant;downstream_gene_variant;intron_variant,NMD_transcript_variant;intron_variant,non_coding_transcript_variant
SANAD_LRR_univariate	chr16	78463512	drug_response	-0.00426	-0.892	0.399	WWOX	intron_variant;downstream_gene_variant;intron_variant,NMD_transcript_variant;intron_variant,non_coding_transcript_variant
SANAD_LRR_Joint_model	chr16	78466758	drug_response	0.000841	0.000342	0.975	WWOX	intron_variant;downstream_gene_variant;intron_variant,NMD_transcript_variant
SANAD_LRR_Joint_model	chr16	78466758	drug_response	0.000841	0.000342	0.975	WWOX	intron_variant;downstream_gene_variant;intron_variant,NMD_transcript_variant
SANAD_LRR_univariate	chr16	78466758	drug_response	0.000841	0.0742	0.937	WWOX	intron_variant;downstream_gene_variant;intron_variant,NMD_transcript_variant
SANAD_LRR_univariate	chr16	78466758	drug_response	0.000841	0.0742	0.937	WWOX	intron_variant;downstream_gene_variant;intron_variant,NMD_transcript_variant
SANAD_Genotype_Joint_model	chr16	78475437	drug_response	0.000173	-0.000346	0.648	WWOX	intron_variant;intron_variant,NMD_transcript_variant
SANAD_Genotype_Univariate	chr16	78475437	drug_response	0.000173	1.93	0.894	WWOX	intron_variant;intron_variant,NMD_transcript_variant
SANAD_LRR_Joint_model	chr16	78475437	drug_response	-0.00442	0.0127	0.414	WWOX	intron_variant;intron_variant,NMD_transcript_variant
SANAD_LRR_Joint_model	chr16	78475437	drug_response	-0.00442	0.0127	0.414	WWOX	intron_variant;intron_variant,NMD_transcript_variant
SANAD_LRR_univariate	chr16	78475437	drug_response	-0.00442	1.43	0.0933	WWOX	intron_variant;intron_variant,NMD_transcript_variant
SANAD_LRR_univariate	chr16	78475437	drug_response	-0.00442	1.43	0.0933	WWOX	intron_variant;intron_variant,NMD_transcript_variant
SANAD_LRR_Joint_model	chr16	78482142	drug_response	0.00612	-0.00823	0.486	WWOX	intron_variant;intron_variant,NMD_transcript_variant
SANAD_LRR_univariate	chr16	78482142	drug_response	0.00612	-1.1	0.284	WWOX	intron_variant;intron_variant,NMD_transcript_variant
SANAD_LRR_Joint_model	chr16	78484174	drug_response	-0.0135	0.0025	0.881	WWOX	intron_variant;intron_variant,NMD_transcript_variant
SANAD_LRR_univariate	chr16	78484174	drug_response	-0.0135	-0.0268	0.964	WWOX	intron_variant;intron_variant,NMD_transcript_variant
SANAD_LRR_Joint_model	chr16	78492951	drug_response	0.00687	-0.000477	0.96	WWOX	intron_variant;intron_variant,NMD_transcript_variant
SANAD_LRR_univariate	chr16	78492951	drug_response	0.00687	-0.0673	0.95	WWOX	intron_variant;intron_variant,NMD_transcript_variant
SANAD_LRR_Joint_model	chr16	78494701	drug_response	-0.00679	-0.00555	0.743	WWOX	intron_variant;intron_variant,NMD_transcript_variant
SANAD_LRR_univariate	chr16	78494701	drug_response	-0.00679	-0.0546	0.93	WWOX	intron_variant;intron_variant,NMD_transcript_variant
SANAD_LRR_Joint_model	chr16	78496735	drug_response	0.00319	0.00651	0.58	WWOX	intron_variant;intron_variant,NMD_transcript_variant
SANAD_LRR_univariate	chr16	78496735	drug_response	0.00319	0.868	0.371	WWOX	intron_variant;intron_variant,NMD_transcript_variant
SANAD_LRR_Joint_model	chr16	78496876	drug_response	0.00432	0.00364	0.733	WWOX	intron_variant;intron_variant,NMD_transcript_variant
SANAD_LRR_univariate	chr16	78496876	drug_response	0.00432	0.52	0.603	WWOX	intron_variant;intron_variant,NMD_transcript_variant
SANAD_LRR_Joint_model	chr16	78498578	drug_response	0.0202	-0.00796	0.553	WWOX	intron_variant;intron_variant,NMD_transcript_variant
SANAD_LRR_univariate	chr16	78498578	drug_response	0.0202	-1.08	0.213	WWOX	intron_variant;intron_variant,NMD_transcript_variant
SANAD_LRR_Joint_model	chr16	78498654	drug_response	0.00462	-0.0158	0.399	WWOX	intron_variant;intron_variant,NMD_transcript_variant
SANAD_LRR_univariate	chr16	78498654	drug_response	0.00462	-1.02	0.148	WWOX	intron_variant;intron_variant,NMD_transcript_variant
SANAD_Genotype_Joint_model	chr16	78501976	drug_response	2.01e-05	-1.87e-06	0.984	WWOX	intron_variant;intron_variant,NMD_transcript_variant
SANAD_Genotype_Univariate	chr16	78501976	drug_response	2.01e-05	695	0.307	WWOX	intron_variant;intron_variant,NMD_transcript_variant
SANAD_LRR_Joint_model	chr16	78501976	drug_response	-0.00604	-8.43e-06	0.999	WWOX	intron_variant;intron_variant,NMD_transcript_variant
SANAD_LRR_univariate	chr16	78501976	drug_response	-0.00604	0.533	0.551	WWOX	intron_variant;intron_variant,NMD_transcript_variant
SANAD_Genotype_Joint_model	chr16	78504998	drug_response	0.000686	-0.00501	0.417	WWOX	intron_variant;intron_variant,NMD_transcript_variant
SANAD_Genotype_Univariate	chr16	78504998	drug_response	0.000686	-14.2	0.152	WWOX	intron_variant;intron_variant,NMD_transcript_variant
SANAD_LRR_Joint_model	chr16	78504998	drug_response	0.0119	-0.00968	0.507	WWOX	intron_variant;intron_variant,NMD_transcript_variant
SANAD_LRR_univariate	chr16	78504998	drug_response	0.0119	-0.985	0.227	WWOX	intron_variant;intron_variant,NMD_transcript_variant
SANAD_Genotype_Joint_model	chr16	78505906	drug_response	0.000478	-0.00515	0.409	WWOX	intron_variant;intron_variant,NMD_transcript_variant
SANAD_Genotype_Univariate	chr16	78505906	drug_response	0.000478	-6.07	0.155	WWOX	intron_variant;intron_variant,NMD_transcript_variant
SANAD_LRR_Joint_model	chr16	78505906	drug_response	-0.0209	1.61e-05	0.999	WWOX	intron_variant;intron_variant,NMD_transcript_variant
SANAD_LRR_univariate	chr16	78505906	drug_response	-0.0209	-0.167	0.718	WWOX	intron_variant;intron_variant,NMD_transcript_variant
SANAD_Genotype_Joint_model	chr16	78514583	drug_response	0.000604	-0.00476	0.417	WWOX	intron_variant;intron_variant,NMD_transcript_variant
SANAD_Genotype_Univariate	chr16	78514583	drug_response	0.000604	-14.9	0.152	WWOX	intron_variant;intron_variant,NMD_transcript_variant
SANAD_LRR_Joint_model	chr16	78514583	drug_response	-0.00496	0.00225	0.863	WWOX	intron_variant;intron_variant,NMD_transcript_variant
SANAD_LRR_univariate	chr16	78514583	drug_response	-0.00496	0.444	0.571	WWOX	intron_variant;intron_variant,NMD_transcript_variant
SANAD_Genotype_Joint_model	chr16	78518911	drug_response	0.000388	-0.00501	0.417	WWOX	intron_variant;intron_variant,NMD_transcript_variant
SANAD_Genotype_Univariate	chr16	78518911	drug_response	0.000388	-14.2	0.152	WWOX	intron_variant;intron_variant,NMD_transcript_variant
SANAD_LRR_Joint_model	chr16	78518911	drug_response	-0.00124	-0.000863	0.959	WWOX	intron_variant;intron_variant,NMD_transcript_variant
SANAD_LRR_univariate	chr16	78518911	drug_response	-0.00124	-0.093	0.877	WWOX	intron_variant;intron_variant,NMD_transcript_variant
SANAD_Genotype_Joint_model	chr16	78519689	drug_response	0.000632	-0.00343	0.417	WWOX	intron_variant;intron_variant,NMD_transcript_variant
SANAD_Genotype_Univariate	chr16	78519689	drug_response	0.000632	-20.7	0.152	WWOX	intron_variant;intron_variant,NMD_transcript_variant
SANAD_LRR_Joint_model	chr16	78519689	drug_response	0.00181	-0.00394	0.788	WWOX	intron_variant;intron_variant,NMD_transcript_variant
SANAD_LRR_univariate	chr16	78519689	drug_response	0.00181	-0.192	0.789	WWOX	intron_variant;intron_variant,NMD_transcript_variant
SANAD_Genotype_Joint_model	chr16	78520045	drug_response	0.000337	-0.00462	0.417	WWOX	intron_variant;intron_variant,NMD_transcript_variant
SANAD_Genotype_Univariate	chr16	78520045	drug_response	0.000337	-15.4	0.152	WWOX	intron_variant;intron_variant,NMD_transcript_variant
SANAD_LRR_Joint_model	chr16	78520045	drug_response	-0.00568	-0.00644	0.636	WWOX	intron_variant;intron_variant,NMD_transcript_variant
SANAD_LRR_univariate	chr16	78520045	drug_response	-0.00568	-0.976	0.224	WWOX	intron_variant;intron_variant,NMD_transcript_variant
SANAD_Genotype_Joint_model	chr16	78522184	drug_response	0.000392	-0.00472	0.417	WWOX	intron_variant;intron_variant,NMD_transcript_variant
SANAD_Genotype_Univariate	chr16	78522184	drug_response	0.000392	-15.1	0.152	WWOX	intron_variant;intron_variant,NMD_transcript_variant
SANAD_LRR_Joint_model	chr16	78522184	drug_response	0.00441	-0.0105	0.498	WWOX	intron_variant;intron_variant,NMD_transcript_variant
SANAD_LRR_univariate	chr16	78522184	drug_response	0.00441	-0.373	0.636	WWOX	intron_variant;intron_variant,NMD_transcript_variant
SANAD_Genotype_Joint_model	chr16	78524330	drug_response	0.000358	-0.00492	0.417	WWOX	intron_variant;intron_variant,NMD_transcript_variant
SANAD_Genotype_Univariate	chr16	78524330	drug_response	0.000358	-14.4	0.152	WWOX	intron_variant;intron_variant,NMD_transcript_variant
SANAD_LRR_Joint_model	chr16	78524330	drug_response	0.00875	-0.00844	0.494	WWOX	intron_variant;intron_variant,NMD_transcript_variant
SANAD_LRR_univariate	chr16	78524330	drug_response	0.00875	-0.677	0.49	WWOX	intron_variant;intron_variant,NMD_transcript_variant
SANAD_Genotype_Joint_model	chr16	78525145	drug_response	0.00919	-0.0167	0.356	WWOX;RP11-264L1.4	downstream_gene_variant;intron_variant;intron_variant,NMD_transcript_variant
SANAD_Genotype_Univariate	chr16	78525145	drug_response	0.00919	-1.25	0.0968	RP11-264L1.4;WWOX	downstream_gene_variant;intron_variant;intron_variant,NMD_transcript_variant
SANAD_LRR_Joint_model	chr16	78525145	drug_response	-0.0266	-0.0169	0.626	WWOX;RP11-264L1.4	intron_variant;downstream_gene_variant;intron_variant,NMD_transcript_variant
SANAD_LRR_univariate	chr16	78525145	drug_response	-0.0266	-0.17	0.603	WWOX;RP11-264L1.4	intron_variant;downstream_gene_variant;intron_variant,NMD_transcript_variant
SANAD_Genotype_Joint_model	chr16	78525242	drug_response	0.00499	-0.0115	0.384	WWOX;RP11-264L1.4	downstream_gene_variant;intron_variant;intron_variant,NMD_transcript_variant
SANAD_Genotype_Univariate	chr16	78525242	drug_response	0.00499	-1.25	0.217	RP11-264L1.4;WWOX	downstream_gene_variant;intron_variant;intron_variant,NMD_transcript_variant
SANAD_LRR_Joint_model	chr16	78525242	drug_response	-0.0037	-0.00805	0.701	WWOX;RP11-264L1.4	intron_variant;downstream_gene_variant;intron_variant,NMD_transcript_variant
SANAD_LRR_univariate	chr16	78525242	drug_response	-0.0037	-0.389	0.446	WWOX;RP11-264L1.4	intron_variant;downstream_gene_variant;intron_variant,NMD_transcript_variant
SANAD_Genotype_Joint_model	chr16	78525327	drug_response	0.00537	-0.00786	0.449	WWOX;RP11-264L1.4	downstream_gene_variant;intron_variant;intron_variant,NMD_transcript_variant
SANAD_Genotype_Univariate	chr16	78525327	drug_response	0.00537	-1.03	0.392	RP11-264L1.4;WWOX	downstream_gene_variant;intron_variant;intron_variant,NMD_transcript_variant
SANAD_LRR_Joint_model	chr16	78525327	drug_response	-0.033	0.00243	0.914	WWOX;RP11-264L1.4	intron_variant;downstream_gene_variant;intron_variant,NMD_transcript_variant
SANAD_LRR_univariate	chr16	78525327	drug_response	-0.033	-0.122	0.788	WWOX;RP11-264L1.4	intron_variant;downstream_gene_variant;intron_variant,NMD_transcript_variant
SANAD_LRR_Joint_model	chr16	78525654	drug_response	-0.0137	0.00122	0.927	WWOX;RP11-264L1.4	intron_variant;downstream_gene_variant;intron_variant,NMD_transcript_variant
SANAD_LRR_univariate	chr16	78525654	drug_response	-0.0137	0.318	0.681	WWOX;RP11-264L1.4	intron_variant;downstream_gene_variant;intron_variant,NMD_transcript_variant
SANAD_LRR_Joint_model	chr16	78525785	drug_response	0.00227	-0.00712	0.579	WWOX;RP11-264L1.4	intron_variant;downstream_gene_variant;intron_variant,NMD_transcript_variant
SANAD_LRR_univariate	chr16	78525785	drug_response	0.00227	-0.321	0.716	WWOX;RP11-264L1.4	intron_variant;downstream_gene_variant;intron_variant,NMD_transcript_variant
SANAD_Genotype_Joint_model	chr16	78525812	drug_response	0.00477	-0.0132	0.336	WWOX;RP11-264L1.4	downstream_gene_variant;intron_variant;intron_variant,NMD_transcript_variant
SANAD_Genotype_Univariate	chr16	78525812	drug_response	0.00477	-1.18	0.258	RP11-264L1.4;WWOX	downstream_gene_variant;intron_variant;intron_variant,NMD_transcript_variant
SANAD_LRR_Joint_model	chr16	78525812	drug_response	-0.00987	-0.00288	0.826	WWOX;RP11-264L1.4	intron_variant;downstream_gene_variant;intron_variant,NMD_transcript_variant
SANAD_LRR_univariate	chr16	78525812	drug_response	-0.00987	-0.415	0.6	WWOX;RP11-264L1.4	intron_variant;downstream_gene_variant;intron_variant,NMD_transcript_variant
SANAD_Genotype_Joint_model	chr16	78525909	drug_response	0.00621	-0.013	0.341	WWOX;RP11-264L1.4	downstream_gene_variant;intron_variant;intron_variant,NMD_transcript_variant
SANAD_Genotype_Univariate	chr16	78525909	drug_response	0.00621	-1.48	0.161	RP11-264L1.4;WWOX	downstream_gene_variant;intron_variant;intron_variant,NMD_transcript_variant
SANAD_LRR_Joint_model	chr16	78525909	drug_response	0.0184	-0.0067	0.777	WWOX;RP11-264L1.4	intron_variant;downstream_gene_variant;intron_variant,NMD_transcript_variant
SANAD_LRR_univariate	chr16	78525909	drug_response	0.0184	0.0919	0.836	WWOX;RP11-264L1.4	intron_variant;downstream_gene_variant;intron_variant,NMD_transcript_variant
SANAD_Genotype_Joint_model	chr16	78525999	drug_response	0.00218	-0.00593	0.45	WWOX;RP11-264L1.4	downstream_gene_variant;intron_variant;intron_variant,NMD_transcript_variant
SANAD_Genotype_Univariate	chr16	78525999	drug_response	0.00218	-1.19	0.461	RP11-264L1.4;WWOX	downstream_gene_variant;intron_variant;intron_variant,NMD_transcript_variant
SANAD_LRR_Joint_model	chr16	78525999	drug_response	0.0116	-0.0021	0.871	WWOX;RP11-264L1.4	intron_variant;downstream_gene_variant;intron_variant,NMD_transcript_variant
SANAD_LRR_univariate	chr16	78525999	drug_response	0.0116	-0.0079	0.992	WWOX;RP11-264L1.4	intron_variant;downstream_gene_variant;intron_variant,NMD_transcript_variant
SANAD_Genotype_Joint_model	chr16	78526083	drug_response	0.00229	-0.00799	0.366	WWOX;RP11-264L1.4	downstream_gene_variant;intron_variant;intron_variant,NMD_transcript_variant
SANAD_Genotype_Univariate	chr16	78526083	drug_response	0.00229	-1.76	0.27	RP11-264L1.4;WWOX	downstream_gene_variant;intron_variant;intron_variant,NMD_transcript_variant
SANAD_LRR_Joint_model	chr16	78526083	drug_response	0.00264	-0.00232	0.916	WWOX;RP11-264L1.4	intron_variant;downstream_gene_variant;intron_variant,NMD_transcript_variant
SANAD_LRR_univariate	chr16	78526083	drug_response	0.00264	0.465	0.399	WWOX;RP11-264L1.4	intron_variant;downstream_gene_variant;intron_variant,NMD_transcript_variant
SANAD_Genotype_Joint_model	chr16	78526137	drug_response	0.00294	-0.0124	0.317	WWOX;RP11-264L1.4	downstream_gene_variant;intron_variant;intron_variant,NMD_transcript_variant
SANAD_Genotype_Univariate	chr16	78526137	drug_response	0.00294	-1.95	0.123	RP11-264L1.4;WWOX	downstream_gene_variant;intron_variant;intron_variant,NMD_transcript_variant
SANAD_LRR_Joint_model	chr16	78526137	drug_response	-0.00527	-0.00694	0.639	WWOX;RP11-264L1.4	intron_variant;downstream_gene_variant;intron_variant,NMD_transcript_variant
SANAD_LRR_univariate	chr16	78526137	drug_response	-0.00527	0.136	0.856	WWOX;RP11-264L1.4	intron_variant;downstream_gene_variant;intron_variant,NMD_transcript_variant
SANAD_Genotype_Joint_model	chr16	78526209	drug_response	0.00293	-0.0104	0.332	WWOX;RP11-264L1.4	downstream_gene_variant;intron_variant;intron_variant,NMD_transcript_variant
SANAD_Genotype_Univariate	chr16	78526209	drug_response	0.00293	-2.03	0.156	RP11-264L1.4;WWOX	downstream_gene_variant;intron_variant;intron_variant,NMD_transcript_variant
SANAD_LRR_Joint_model	chr16	78526209	drug_response	-0.00102	-0.0039	0.814	WWOX;RP11-264L1.4	intron_variant;downstream_gene_variant;intron_variant,NMD_transcript_variant
SANAD_LRR_univariate	chr16	78526209	drug_response	-0.00102	0.288	0.648	WWOX;RP11-264L1.4	intron_variant;downstream_gene_variant;intron_variant,NMD_transcript_variant
SANAD_Genotype_Joint_model	chr16	78526294	drug_response	0.00316	-0.0114	0.342	WWOX;RP11-264L1.4	downstream_gene_variant;intron_variant;intron_variant,NMD_transcript_variant
SANAD_Genotype_Univariate	chr16	78526294	drug_response	0.00316	-1.67	0.173	RP11-264L1.4;WWOX	downstream_gene_variant;intron_variant;intron_variant,NMD_transcript_variant
SANAD_LRR_Joint_model	chr16	78526294	drug_response	-0.0144	-0.0138	0.402	WWOX;RP11-264L1.4	intron_variant;downstream_gene_variant;intron_variant,NMD_transcript_variant
SANAD_LRR_univariate	chr16	78526294	drug_response	-0.0144	-0.579	0.473	WWOX;RP11-264L1.4	intron_variant;downstream_gene_variant;intron_variant,NMD_transcript_variant
SANAD_Genotype_Joint_model	chr16	78526427	drug_response	0.00353	-0.015	0.303	WWOX;RP11-264L1.4	downstream_gene_variant;intron_variant;intron_variant,NMD_transcript_variant
SANAD_Genotype_Univariate	chr16	78526427	drug_response	0.00353	-1.85	0.0909	RP11-264L1.4;WWOX	downstream_gene_variant;intron_variant;intron_variant,NMD_transcript_variant
SANAD_LRR_Joint_model	chr16	78526427	drug_response	-0.00878	-0.00567	0.757	WWOX;RP11-264L1.4	intron_variant;downstream_gene_variant;intron_variant,NMD_transcript_variant
SANAD_LRR_univariate	chr16	78526427	drug_response	-0.00878	-0.0968	0.866	WWOX;RP11-264L1.4	intron_variant;downstream_gene_variant;intron_variant,NMD_transcript_variant
SANAD_LRR_Joint_model	chr16	78526603	drug_response	-0.0101	-0.00675	0.641	WWOX;RP11-264L1.4	intron_variant;downstream_gene_variant;intron_variant,NMD_transcript_variant
SANAD_LRR_univariate	chr16	78526603	drug_response	-0.0101	-0.553	0.468	WWOX;RP11-264L1.4	intron_variant;downstream_gene_variant;intron_variant,NMD_transcript_variant
SANAD_Genotype_Joint_model	chr16	78526622	drug_response	0.00435	-0.0148	0.308	WWOX;RP11-264L1.4	downstream_gene_variant;intron_variant;intron_variant,NMD_transcript_variant
SANAD_Genotype_Univariate	chr16	78526622	drug_response	0.00435	-1.81	0.0948	RP11-264L1.4;WWOX	downstream_gene_variant;intron_variant;intron_variant,NMD_transcript_variant
SANAD_LRR_Joint_model	chr16	78526622	drug_response	-0.0102	0.00422	0.855	WWOX;RP11-264L1.4	intron_variant;downstream_gene_variant;intron_variant,NMD_transcript_variant
SANAD_LRR_univariate	chr16	78526622	drug_response	-0.0102	0.259	0.563	WWOX;RP11-264L1.4	intron_variant;downstream_gene_variant;intron_variant,NMD_transcript_variant
SANAD_LRR_Joint_model	chr16	78526784	drug_response	0.00879	-0.00318	0.861	WWOX;RP11-264L1.4	intron_variant;downstream_gene_variant;intron_variant,NMD_transcript_variant
SANAD_LRR_univariate	chr16	78526784	drug_response	0.00879	-0.0678	0.905	WWOX;RP11-264L1.4	intron_variant;downstream_gene_variant;intron_variant,NMD_transcript_variant
SANAD_LRR_Joint_model	chr16	78526898	drug_response	-0.0219	-0.00804	0.676	WWOX;RP11-264L1.4	intron_variant;downstream_gene_variant;intron_variant,NMD_transcript_variant
SANAD_LRR_univariate	chr16	78526898	drug_response	-0.0219	-0.322	0.569	WWOX;RP11-264L1.4	intron_variant;downstream_gene_variant;intron_variant,NMD_transcript_variant
SANAD_Genotype_Joint_model	chr16	78527004	drug_response	0.00185	0.00031	0.415	WWOX;RP11-264L1.4	downstream_gene_variant;intron_variant;intron_variant,NMD_transcript_variant
SANAD_Genotype_Univariate	chr16	78527004	drug_response	0.00185	760	0.0583	RP11-264L1.4;WWOX	downstream_gene_variant;intron_variant;intron_variant,NMD_transcript_variant
SANAD_LRR_Joint_model	chr16	78527004	drug_response	-0.00133	-0.0118	0.641	WWOX;RP11-264L1.4	intron_variant;downstream_gene_variant;intron_variant,NMD_transcript_variant
SANAD_LRR_univariate	chr16	78527004	drug_response	-0.00133	-0.323	0.463	WWOX;RP11-264L1.4	intron_variant;downstream_gene_variant;intron_variant,NMD_transcript_variant
SANAD_LRR_Joint_model	chr16	78527664	drug_response	0.0105	-0.00219	0.838	WWOX;RP11-264L1.4	intron_variant;downstream_gene_variant;intron_variant,NMD_transcript_variant
SANAD_LRR_univariate	chr16	78527664	drug_response	0.0105	-0.249	0.795	WWOX;RP11-264L1.4	intron_variant;downstream_gene_variant;intron_variant,NMD_transcript_variant
SANAD_LRR_Joint_model	chr16	78529379	drug_response	-0.00911	0.00792	0.696	WWOX;RP11-264L1.4	intron_variant;downstream_gene_variant;intron_variant,NMD_transcript_variant
SANAD_LRR_univariate	chr16	78529379	drug_response	-0.00911	0.0949	0.857	WWOX;RP11-264L1.4	intron_variant;downstream_gene_variant;intron_variant,NMD_transcript_variant
SANAD_Genotype_Joint_model	chr16	78531632	drug_response	0.00164	-0.00205	0.508	WWOX;RP11-264L1.4	intron_variant,non_coding_transcript_variant;intron_variant;intron_variant,NMD_transcript_variant
SANAD_Genotype_Univariate	chr16	78531632	drug_response	0.00164	-24.7	0.25	RP11-264L1.4;WWOX	intron_variant,non_coding_transcript_variant;intron_variant;intron_variant,NMD_transcript_variant
SANAD_LRR_Joint_model	chr16	78531632	drug_response	-0.0079	0.00119	0.935	WWOX;RP11-264L1.4	intron_variant;intron_variant,non_coding_transcript_variant;intron_variant,NMD_transcript_variant
SANAD_LRR_univariate	chr16	78531632	drug_response	-0.0079	-0.171	0.805	WWOX;RP11-264L1.4	intron_variant;intron_variant,NMD_transcript_variant;intron_variant,non_coding_transcript_variant
SANAD_LRR_Joint_model	chr16	78533357	drug_response	0.000369	0.0151	0.33	WWOX;RP11-264L1.4	intron_variant;intron_variant,non_coding_transcript_variant;intron_variant,NMD_transcript_variant
SANAD_LRR_univariate	chr16	78533357	drug_response	0.000369	1.36	0.148	WWOX;RP11-264L1.4	intron_variant;intron_variant,NMD_transcript_variant;intron_variant,non_coding_transcript_variant
SANAD_LRR_Joint_model	chr16	78538355	drug_response	0.0128	-0.0147	0.405	WWOX;RP11-264L1.4	intron_variant;intron_variant,non_coding_transcript_variant;intron_variant,NMD_transcript_variant
SANAD_LRR_univariate	chr16	78538355	drug_response	0.0128	-0.637	0.392	WWOX;RP11-264L1.4	intron_variant;intron_variant,NMD_transcript_variant;intron_variant,non_coding_transcript_variant
SANAD_LRR_Joint_model	chr16	78540426	drug_response	0.00952	0.00644	0.666	WWOX;RP11-264L1.4	non_coding_transcript_exon_variant;intron_variant;intron_variant,NMD_transcript_variant
SANAD_LRR_univariate	chr16	78540426	drug_response	0.00952	0.796	0.271	WWOX;RP11-264L1.4	intron_variant;non_coding_transcript_exon_variant;intron_variant,NMD_transcript_variant
SANAD_LRR_Joint_model	chr16	78541148	drug_response	0.00736	-0.0196	0.36	WWOX;RP11-264L1.4	intron_variant;intron_variant,NMD_transcript_variant;upstream_gene_variant
SANAD_LRR_univariate	chr16	78541148	drug_response	0.00736	-0.972	0.136	WWOX;RP11-264L1.4	intron_variant;upstream_gene_variant;intron_variant,NMD_transcript_variant
SANAD_LRR_Joint_model	chr16	78541355	drug_response	-0.0084	-0.00539	0.675	WWOX;RP11-264L1.4	intron_variant;intron_variant,NMD_transcript_variant;upstream_gene_variant
SANAD_LRR_univariate	chr16	78541355	drug_response	-0.0084	-0.298	0.723	WWOX;RP11-264L1.4	intron_variant;upstream_gene_variant;intron_variant,NMD_transcript_variant
SANAD_LRR_Joint_model	chr16	78544448	drug_response	-0.00379	0.027	0.309	WWOX;RP11-264L1.4	intron_variant;intron_variant,NMD_transcript_variant;upstream_gene_variant
SANAD_LRR_univariate	chr16	78544448	drug_response	-0.00379	0.713	0.21	WWOX;RP11-264L1.4	intron_variant;upstream_gene_variant;intron_variant,NMD_transcript_variant
SANAD_LRR_Joint_model	chr16	78548574	drug_response	-0.00189	-0.0221	0.339	WWOX	intron_variant;intron_variant,NMD_transcript_variant
SANAD_LRR_univariate	chr16	78548574	drug_response	-0.00189	-1.16	0.0622	WWOX	intron_variant;intron_variant,NMD_transcript_variant
SANAD_LRR_Joint_model	chr16	78549995	drug_response	0.0029	-0.00164	0.906	WWOX	intron_variant;intron_variant,NMD_transcript_variant
SANAD_LRR_univariate	chr16	78549995	drug_response	0.0029	-0.0786	0.915	WWOX	intron_variant;intron_variant,NMD_transcript_variant
SANAD_LRR_Joint_model	chr16	78551317	drug_response	-0.0164	0.00586	0.682	WWOX	intron_variant;intron_variant,NMD_transcript_variant
SANAD_LRR_univariate	chr16	78551317	drug_response	-0.0164	0.544	0.475	WWOX	intron_variant;intron_variant,NMD_transcript_variant
SANAD_LRR_Joint_model	chr16	78552954	drug_response	-0.00244	-0.00877	0.505	WWOX	intron_variant;intron_variant,NMD_transcript_variant
SANAD_LRR_univariate	chr16	78552954	drug_response	-0.00244	-0.247	0.787	WWOX	intron_variant;intron_variant,NMD_transcript_variant
SANAD_LRR_Joint_model	chr16	78556999	drug_response	-0.00638	-0.00693	0.601	WWOX	intron_variant;intron_variant,NMD_transcript_variant
SANAD_LRR_univariate	chr16	78556999	drug_response	-0.00638	0.00887	0.992	WWOX	intron_variant;intron_variant,NMD_transcript_variant
SANAD_LRR_Joint_model	chr16	78561116	drug_response	-0.0104	-0.000949	0.938	WWOX	intron_variant;intron_variant,NMD_transcript_variant
SANAD_LRR_univariate	chr16	78561116	drug_response	-0.0104	0.263	0.749	WWOX	intron_variant;intron_variant,NMD_transcript_variant
SANAD_LRR_Joint_model	chr16	78563832	drug_response	0.00901	-0.00686	0.771	RP11-264L1.3;WWOX	intron_variant;intron_variant,NMD_transcript_variant;upstream_gene_variant
SANAD_LRR_univariate	chr16	78563832	drug_response	0.00901	-0.0833	0.851	WWOX;RP11-264L1.3	intron_variant;upstream_gene_variant;intron_variant,NMD_transcript_variant
SANAD_LRR_Joint_model	chr16	78564441	drug_response	0.00128	-0.00446	0.787	RP11-264L1.3;WWOX	intron_variant;intron_variant,NMD_transcript_variant;upstream_gene_variant
SANAD_LRR_univariate	chr16	78564441	drug_response	0.00128	-0.25	0.691	WWOX;RP11-264L1.3	intron_variant;upstream_gene_variant;intron_variant,NMD_transcript_variant
SANAD_LRR_Joint_model	chr16	78565006	drug_response	-0.017	-0.000466	0.972	RP11-264L1.3;WWOX	intron_variant;intron_variant,NMD_transcript_variant;upstream_gene_variant
SANAD_LRR_univariate	chr16	78565006	drug_response	-0.017	0.0369	0.961	WWOX;RP11-264L1.3	intron_variant;upstream_gene_variant;intron_variant,NMD_transcript_variant
SANAD_LRR_Joint_model	chr16	78566801	drug_response	0.0177	0.00236	0.85	RP11-264L1.3;WWOX	intron_variant;intron_variant,NMD_transcript_variant;upstream_gene_variant
SANAD_LRR_univariate	chr16	78566801	drug_response	0.0177	0.544	0.511	WWOX;RP11-264L1.3	intron_variant;upstream_gene_variant;intron_variant,NMD_transcript_variant
SANAD_LRR_Joint_model	chr16	78568270	drug_response	-0.00413	0.0037	0.75	RP11-264L1.3;WWOX	intron_variant;intron_variant,NMD_transcript_variant;upstream_gene_variant
SANAD_LRR_univariate	chr16	78568270	drug_response	-0.00413	0.75	0.411	WWOX;RP11-264L1.3	intron_variant;upstream_gene_variant;intron_variant,NMD_transcript_variant
SANAD_LRR_Joint_model	chr16	78568430	drug_response	-0.00602	0.0149	0.313	RP11-264L1.3;WWOX	non_coding_transcript_exon_variant;intron_variant;intron_variant,NMD_transcript_variant
SANAD_LRR_univariate	chr16	78568430	drug_response	-0.00602	1.36	0.182	WWOX;RP11-264L1.3	intron_variant;non_coding_transcript_exon_variant;intron_variant,NMD_transcript_variant
SANAD_LRR_Joint_model	chr16	78571750	drug_response	0.01	-0.0012	0.941	RP11-264L1.3;WWOX	intron_variant;downstream_gene_variant;intron_variant,NMD_transcript_variant
SANAD_LRR_univariate	chr16	78571750	drug_response	0.01	-0.341	0.589	WWOX;RP11-264L1.3	intron_variant;downstream_gene_variant;intron_variant,NMD_transcript_variant
SANAD_LRR_Joint_model	chr16	78572354	drug_response	-0.00557	0.0163	0.356	RP11-264L1.3;WWOX	intron_variant;downstream_gene_variant;intron_variant,NMD_transcript_variant
SANAD_LRR_univariate	chr16	78572354	drug_response	-0.00557	0.587	0.46	WWOX;RP11-264L1.3	intron_variant;downstream_gene_variant;intron_variant,NMD_transcript_variant
SANAD_LRR_Joint_model	chr16	78572542	drug_response	0.00543	0.0055	0.614	RP11-264L1.3;WWOX	intron_variant;downstream_gene_variant;intron_variant,NMD_transcript_variant
SANAD_LRR_univariate	chr16	78572542	drug_response	0.00543	1.03	0.313	WWOX;RP11-264L1.3	intron_variant;downstream_gene_variant;intron_variant,NMD_transcript_variant
SANAD_LRR_Joint_model	chr16	78573025	drug_response	-0.00587	0.0108	0.472	RP11-264L1.3;WWOX	intron_variant;downstream_gene_variant;intron_variant,NMD_transcript_variant
SANAD_LRR_univariate	chr16	78573025	drug_response	-0.00587	0.856	0.297	WWOX;RP11-264L1.3	intron_variant;downstream_gene_variant;intron_variant,NMD_transcript_variant
SANAD_LRR_Joint_model	chr16	78573060	drug_response	0.013	-0.0115	0.54	RP11-264L1.3;WWOX	intron_variant;downstream_gene_variant;intron_variant,NMD_transcript_variant
SANAD_LRR_univariate	chr16	78573060	drug_response	0.013	-0.346	0.576	WWOX;RP11-264L1.3	intron_variant;downstream_gene_variant;intron_variant,NMD_transcript_variant
SANAD_LRR_Joint_model	chr16	78577298	drug_response	0.0188	-0.0179	0.354	WWOX	intron_variant;intron_variant,NMD_transcript_variant
SANAD_LRR_univariate	chr16	78577298	drug_response	0.0188	-0.785	0.28	WWOX	intron_variant;intron_variant,NMD_transcript_variant
SANAD_LRR_Joint_model	chr16	78577582	drug_response	-0.00268	-0.00851	0.585	WWOX	intron_variant;intron_variant,NMD_transcript_variant
SANAD_LRR_univariate	chr16	78577582	drug_response	-0.00268	-0.304	0.676	WWOX	intron_variant;intron_variant,NMD_transcript_variant
SANAD_LRR_Joint_model	chr16	78581206	drug_response	-0.0132	0.00108	0.949	WWOX	intron_variant;intron_variant,NMD_transcript_variant
SANAD_LRR_univariate	chr16	78581206	drug_response	-0.0132	0.139	0.817	WWOX	intron_variant;intron_variant,NMD_transcript_variant
SANAD_LRR_Joint_model	chr16	78583257	drug_response	0.0229	-0.00629	0.735	WWOX	intron_variant;intron_variant,NMD_transcript_variant
SANAD_LRR_univariate	chr16	78583257	drug_response	0.0229	-0.219	0.703	WWOX	intron_variant;intron_variant,NMD_transcript_variant
SANAD_LRR_Joint_model	chr16	78588532	drug_response	0.000213	-0.00377	0.843	WWOX	intron_variant;intron_variant,NMD_transcript_variant
SANAD_LRR_univariate	chr16	78588532	drug_response	0.000213	-0.0596	0.912	WWOX	intron_variant;intron_variant,NMD_transcript_variant
SANAD_LRR_Joint_model	chr16	78590925	drug_response	-0.00434	0.0152	0.409	WWOX	intron_variant;intron_variant,NMD_transcript_variant
SANAD_LRR_univariate	chr16	78590925	drug_response	-0.00434	0.738	0.304	WWOX	intron_variant;intron_variant,NMD_transcript_variant
SANAD_LRR_Joint_model	chr16	78595260	drug_response	0.00178	-0.00683	0.565	WWOX	intron_variant;intron_variant,NMD_transcript_variant
SANAD_LRR_univariate	chr16	78595260	drug_response	0.00178	-0.601	0.531	WWOX	intron_variant;intron_variant,NMD_transcript_variant
SANAD_LRR_Joint_model	chr16	78597315	drug_response	-0.00534	-0.00484	0.759	WWOX	intron_variant;intron_variant,NMD_transcript_variant
SANAD_LRR_univariate	chr16	78597315	drug_response	-0.00534	-0.608	0.365	WWOX	intron_variant;intron_variant,NMD_transcript_variant
SANAD_LRR_Joint_model	chr16	78598855	drug_response	-0.032	0.0255	0.252	WWOX	intron_variant;intron_variant,NMD_transcript_variant
SANAD_LRR_univariate	chr16	78598855	drug_response	-0.032	1.76	0.0234	WWOX	intron_variant;intron_variant,NMD_transcript_variant
SANAD_LRR_Joint_model	chr16	78601706	drug_response	-0.000691	0.0144	0.568	WWOX	intron_variant;intron_variant,NMD_transcript_variant
SANAD_LRR_univariate	chr16	78601706	drug_response	-0.000691	0.354	0.436	WWOX	intron_variant;intron_variant,NMD_transcript_variant
SANAD_LRR_Joint_model	chr16	78604831	drug_response	0.0131	-0.0106	0.497	WWOX	intron_variant;intron_variant,NMD_transcript_variant
SANAD_LRR_univariate	chr16	78604831	drug_response	0.0131	-0.752	0.333	WWOX	intron_variant;intron_variant,NMD_transcript_variant
SANAD_LRR_Joint_model	chr16	78607252	drug_response	-0.00839	-0.00315	0.846	WWOX	intron_variant;intron_variant,NMD_transcript_variant
SANAD_LRR_univariate	chr16	78607252	drug_response	-0.00839	-0.464	0.466	WWOX	intron_variant;intron_variant,NMD_transcript_variant
SANAD_LRR_Joint_model	chr16	78607349	drug_response	-0.00402	-0.00138	0.921	WWOX	intron_variant;intron_variant,NMD_transcript_variant
SANAD_LRR_univariate	chr16	78607349	drug_response	-0.00402	-0.561	0.443	WWOX	intron_variant;intron_variant,NMD_transcript_variant
SANAD_LRR_Joint_model	chr16	78612914	drug_response	-0.0197	-0.00811	0.628	WWOX	intron_variant;intron_variant,NMD_transcript_variant
SANAD_LRR_univariate	chr16	78612914	drug_response	-0.0197	-0.383	0.563	WWOX	intron_variant;intron_variant,NMD_transcript_variant
SANAD_LRR_Joint_model	chr16	78614508	drug_response	-0.01	-0.00115	0.926	WWOX	intron_variant;intron_variant,NMD_transcript_variant
SANAD_LRR_univariate	chr16	78614508	drug_response	-0.01	-0.0655	0.937	WWOX	intron_variant;intron_variant,NMD_transcript_variant
SANAD_LRR_Joint_model	chr16	78615030	drug_response	-0.0301	0.00818	0.714	WWOX	intron_variant;intron_variant,NMD_transcript_variant
SANAD_LRR_univariate	chr16	78615030	drug_response	-0.0301	-0.0299	0.95	WWOX	intron_variant;intron_variant,NMD_transcript_variant
SANAD_LRR_Joint_model	chr16	78617931	drug_response	0.00712	0.00531	0.623	WWOX	intron_variant;intron_variant,NMD_transcript_variant
SANAD_LRR_univariate	chr16	78617931	drug_response	0.00712	0.684	0.508	WWOX	intron_variant;intron_variant,NMD_transcript_variant
SANAD_LRR_Joint_model	chr16	78618421	drug_response	-0.0075	-0.00163	0.89	WWOX	intron_variant;intron_variant,NMD_transcript_variant
SANAD_LRR_univariate	chr16	78618421	drug_response	-0.0075	-0.566	0.515	WWOX	intron_variant;intron_variant,NMD_transcript_variant
SANAD_LRR_Joint_model	chr16	78622887	drug_response	0.0024	0.00335	0.79	WWOX	intron_variant;intron_variant,NMD_transcript_variant
SANAD_LRR_univariate	chr16	78622887	drug_response	0.0024	0.377	0.65	WWOX	intron_variant;intron_variant,NMD_transcript_variant
SANAD_LRR_Joint_model	chr16	78627429	drug_response	0.007	-0.0128	0.673	WWOX	intron_variant;intron_variant,NMD_transcript_variant
SANAD_LRR_univariate	chr16	78627429	drug_response	0.007	-0.147	0.683	WWOX	intron_variant;intron_variant,NMD_transcript_variant
SANAD_LRR_Joint_model	chr16	78631794	drug_response	-0.00386	-0.023	0.295	WWOX	intron_variant;intron_variant,NMD_transcript_variant
SANAD_LRR_univariate	chr16	78631794	drug_response	-0.00386	-1.05	0.139	WWOX	intron_variant;intron_variant,NMD_transcript_variant
SANAD_LRR_Joint_model	chr16	78635193	drug_response	0.00564	8.87e-05	0.995	WWOX	intron_variant;intron_variant,NMD_transcript_variant
SANAD_LRR_univariate	chr16	78635193	drug_response	0.00564	-0.0622	0.931	WWOX	intron_variant;intron_variant,NMD_transcript_variant
SANAD_LRR_Joint_model	chr16	78635695	drug_response	0.00356	-0.00212	0.845	WWOX	intron_variant;intron_variant,NMD_transcript_variant
SANAD_LRR_univariate	chr16	78635695	drug_response	0.00356	-0.4	0.676	WWOX	intron_variant;intron_variant,NMD_transcript_variant
SANAD_LRR_Joint_model	chr16	78641740	drug_response	0.026	0.00214	0.886	WWOX	intron_variant;intron_variant,NMD_transcript_variant
SANAD_LRR_univariate	chr16	78641740	drug_response	0.026	0.43	0.532	WWOX	intron_variant;intron_variant,NMD_transcript_variant
SANAD_LRR_Joint_model	chr16	78646204	drug_response	-0.00646	-0.0143	0.354	WWOX	intron_variant;intron_variant,NMD_transcript_variant
SANAD_LRR_univariate	chr16	78646204	drug_response	-0.00646	-1.71	0.0606	WWOX	intron_variant;intron_variant,NMD_transcript_variant
SANAD_LRR_Joint_model	chr16	78650820	drug_response	-0.00811	-0.00792	0.688	WWOX	intron_variant;intron_variant,NMD_transcript_variant
SANAD_LRR_univariate	chr16	78650820	drug_response	-0.00811	-0.0755	0.89	WWOX	intron_variant;intron_variant,NMD_transcript_variant
SANAD_LRR_Joint_model	chr16	78657038	drug_response	0.000545	0.00945	0.54	WWOX	intron_variant;intron_variant,NMD_transcript_variant
SANAD_LRR_univariate	chr16	78657038	drug_response	0.000545	0.745	0.325	WWOX	intron_variant;intron_variant,NMD_transcript_variant
SANAD_LRR_Joint_model	chr16	78657827	drug_response	-0.00746	0.00246	0.861	WWOX	intron_variant;intron_variant,NMD_transcript_variant
SANAD_LRR_univariate	chr16	78657827	drug_response	-0.00746	-0.311	0.671	WWOX	intron_variant;intron_variant,NMD_transcript_variant
SANAD_LRR_Joint_model	chr16	78658393	drug_response	-0.0228	-0.00524	0.776	WWOX	intron_variant;intron_variant,NMD_transcript_variant
SANAD_LRR_univariate	chr16	78658393	drug_response	-0.0228	-0.213	0.708	WWOX	intron_variant;intron_variant,NMD_transcript_variant
SANAD_LRR_Joint_model	chr16	78661183	drug_response	-0.00348	0.0034	0.768	WWOX	intron_variant;intron_variant,NMD_transcript_variant
SANAD_LRR_univariate	chr16	78661183	drug_response	-0.00348	0.807	0.372	WWOX	intron_variant;intron_variant,NMD_transcript_variant
SANAD_LRR_Joint_model	chr16	78662910	drug_response	-0.0173	0.00135	0.912	WWOX	intron_variant;intron_variant,NMD_transcript_variant
SANAD_LRR_univariate	chr16	78662910	drug_response	-0.0173	0.163	0.844	WWOX	intron_variant;intron_variant,NMD_transcript_variant
SANAD_LRR_Joint_model	chr16	78667846	drug_response	0.0106	0.00116	0.934	WWOX	intron_variant;intron_variant,NMD_transcript_variant
SANAD_LRR_univariate	chr16	78667846	drug_response	0.0106	-0.0971	0.893	WWOX	intron_variant;intron_variant,NMD_transcript_variant
SANAD_LRR_Joint_model	chr16	78670954	drug_response	0.0119	0.0118	0.489	WWOX	intron_variant;intron_variant,NMD_transcript_variant
SANAD_LRR_univariate	chr16	78670954	drug_response	0.0119	0.329	0.643	WWOX	intron_variant;intron_variant,NMD_transcript_variant
SANAD_LRR_Joint_model	chr16	78677139	drug_response	-0.0103	-0.00278	0.853	WWOX	intron_variant;intron_variant,NMD_transcript_variant
SANAD_LRR_univariate	chr16	78677139	drug_response	-0.0103	-0.362	0.599	WWOX	intron_variant;intron_variant,NMD_transcript_variant
SANAD_LRR_Joint_model	chr16	78678727	drug_response	-0.0227	0.0109	0.492	WWOX	intron_variant;intron_variant,NMD_transcript_variant
SANAD_LRR_univariate	chr16	78678727	drug_response	-0.0227	0.182	0.812	WWOX	intron_variant;intron_variant,NMD_transcript_variant
SANAD_LRR_Joint_model	chr16	78679131	drug_response	0.00312	-0.00571	0.617	WWOX	intron_variant;intron_variant,NMD_transcript_variant
SANAD_LRR_univariate	chr16	78679131	drug_response	0.00312	-0.539	0.577	WWOX	intron_variant;intron_variant,NMD_transcript_variant
SANAD_LRR_Joint_model	chr16	78681118	drug_response	0.0195	-0.0169	0.601	WWOX	intron_variant;intron_variant,NMD_transcript_variant
SANAD_LRR_univariate	chr16	78681118	drug_response	0.0195	-0.125	0.717	WWOX	intron_variant;intron_variant,NMD_transcript_variant
SANAD_LRR_Joint_model	chr16	78681303	drug_response	-0.000458	0.00394	0.796	WWOX	intron_variant;intron_variant,NMD_transcript_variant
SANAD_LRR_univariate	chr16	78681303	drug_response	-0.000458	0.094	0.891	WWOX	intron_variant;intron_variant,NMD_transcript_variant
SANAD_LRR_Joint_model	chr16	78681957	drug_response	0.00655	-0.0109	0.599	WWOX	intron_variant;intron_variant,NMD_transcript_variant
SANAD_LRR_univariate	chr16	78681957	drug_response	0.00655	-0.231	0.671	WWOX	intron_variant;intron_variant,NMD_transcript_variant
SANAD_LRR_Joint_model	chr16	78682036	drug_response	0.0267	-0.0179	0.354	WWOX	intron_variant;intron_variant,NMD_transcript_variant
SANAD_LRR_univariate	chr16	78682036	drug_response	0.0267	-0.606	0.401	WWOX	intron_variant;intron_variant,NMD_transcript_variant
SANAD_LRR_Joint_model	chr16	78688144	drug_response	-0.0297	0.0136	0.456	WWOX	intron_variant;intron_variant,NMD_transcript_variant
SANAD_LRR_univariate	chr16	78688144	drug_response	-0.0297	1.05	0.127	WWOX	intron_variant;intron_variant,NMD_transcript_variant
SANAD_LRR_Joint_model	chr16	78691286	drug_response	-0.00405	0.0241	0.271	WWOX	intron_variant;intron_variant,NMD_transcript_variant
SANAD_LRR_Joint_modelVS	chr16	78691286	drug_response	-0.00405	0.0237	0.0153	WWOX	intron_variant,NMD_transcript_variant;intron_variant
SANAD_LRR_univariate	chr16	78691286	drug_response	-0.00405	1.77	0.0165	WWOX	intron_variant;intron_variant,NMD_transcript_variant
SANAD_LRR_Joint_model	chr16	78694695	drug_response	0.00662	-0.0173	0.378	WWOX	intron_variant;intron_variant,NMD_transcript_variant
SANAD_LRR_univariate	chr16	78694695	drug_response	0.00662	-0.196	0.776	WWOX	intron_variant;intron_variant,NMD_transcript_variant
SANAD_LRR_Joint_model	chr16	78696257	drug_response	0.00774	-0.0232	0.258	WWOX	intron_variant;intron_variant,NMD_transcript_variant
SANAD_LRR_univariate	chr16	78696257	drug_response	0.00774	-1.51	0.0655	WWOX	intron_variant;intron_variant,NMD_transcript_variant
SANAD_LRR_Joint_model	chr16	78700989	drug_response	0.00831	-0.00254	0.865	WWOX	intron_variant;intron_variant,NMD_transcript_variant
SANAD_LRR_univariate	chr16	78700989	drug_response	0.00831	0.0312	0.964	WWOX	intron_variant;intron_variant,NMD_transcript_variant
SANAD_LRR_Joint_model	chr16	78702656	drug_response	0.00687	0.00221	0.873	WWOX	intron_variant;intron_variant,NMD_transcript_variant
SANAD_LRR_univariate	chr16	78702656	drug_response	0.00687	0.458	0.54	WWOX	intron_variant;intron_variant,NMD_transcript_variant
SANAD_LRR_Joint_model	chr16	78704319	drug_response	-0.0143	-0.00536	0.706	WWOX	intron_variant;intron_variant,NMD_transcript_variant
SANAD_LRR_univariate	chr16	78704319	drug_response	-0.0143	-0.229	0.76	WWOX	intron_variant;intron_variant,NMD_transcript_variant
SANAD_LRR_Joint_model	chr16	78705026	drug_response	-0.00556	0.00342	0.79	WWOX	intron_variant;intron_variant,NMD_transcript_variant
SANAD_LRR_univariate	chr16	78705026	drug_response	-0.00556	0.221	0.787	WWOX	intron_variant;intron_variant,NMD_transcript_variant
SANAD_LRR_Joint_model	chr16	78705981	drug_response	-0.00478	0.00964	0.459	WWOX	intron_variant;intron_variant,NMD_transcript_variant
SANAD_LRR_univariate	chr16	78705981	drug_response	-0.00478	0.317	0.739	WWOX	intron_variant;intron_variant,NMD_transcript_variant
SANAD_LRR_Joint_model	chr16	78706825	drug_response	-0.00157	-0.00477	0.748	WWOX	intron_variant;intron_variant,NMD_transcript_variant
SANAD_LRR_univariate	chr16	78706825	drug_response	-0.00157	-0.727	0.305	WWOX	intron_variant;intron_variant,NMD_transcript_variant
SANAD_LRR_Joint_model	chr16	78708698	drug_response	-0.0312	-0.00829	0.61	WWOX	intron_variant;intron_variant,NMD_transcript_variant
SANAD_LRR_univariate	chr16	78708698	drug_response	-0.0312	-0.785	0.252	WWOX	intron_variant;intron_variant,NMD_transcript_variant
SANAD_LRR_Joint_model	chr16	78711590	drug_response	0.00134	-0.00287	0.809	WWOX	intron_variant;intron_variant,NMD_transcript_variant
SANAD_LRR_univariate	chr16	78711590	drug_response	0.00134	-0.525	0.545	WWOX	intron_variant;intron_variant,NMD_transcript_variant
SANAD_LRR_Joint_model	chr16	78713526	drug_response	-0.00842	-0.0116	0.515	WWOX	intron_variant;intron_variant,NMD_transcript_variant
SANAD_LRR_univariate	chr16	78713526	drug_response	-0.00842	-0.317	0.637	WWOX	intron_variant;intron_variant,NMD_transcript_variant
SANAD_LRR_Joint_model	chr16	78715604	drug_response	0.00306	0.00212	0.867	WWOX	intron_variant;intron_variant,NMD_transcript_variant
SANAD_LRR_univariate	chr16	78715604	drug_response	0.00306	0.332	0.682	WWOX	intron_variant;intron_variant,NMD_transcript_variant
SANAD_LRR_Joint_model	chr16	78716741	drug_response	-0.0144	-0.00813	0.582	WWOX	intron_variant;intron_variant,NMD_transcript_variant
SANAD_LRR_univariate	chr16	78716741	drug_response	-0.0144	-0.365	0.634	WWOX	intron_variant;intron_variant,NMD_transcript_variant
SANAD_LRR_Joint_model	chr16	78717952	drug_response	0.00409	0.0178	0.352	WWOX	intron_variant;intron_variant,NMD_transcript_variant
SANAD_LRR_univariate	chr16	78717952	drug_response	0.00409	1.17	0.112	WWOX	intron_variant;intron_variant,NMD_transcript_variant
SANAD_LRR_Joint_model	chr16	78718027	drug_response	0.00251	0.0105	0.51	WWOX	intron_variant;intron_variant,NMD_transcript_variant
SANAD_LRR_univariate	chr16	78718027	drug_response	0.00251	0.685	0.359	WWOX	intron_variant;intron_variant,NMD_transcript_variant
SANAD_LRR_Joint_model	chr16	78719199	drug_response	-0.0141	-0.0158	0.324	WWOX	intron_variant;intron_variant,NMD_transcript_variant
SANAD_LRR_univariate	chr16	78719199	drug_response	-0.0141	-1.21	0.192	WWOX	intron_variant;intron_variant,NMD_transcript_variant
SANAD_LRR_Joint_model	chr16	78719414	drug_response	0.000615	0.00478	0.731	WWOX	intron_variant;intron_variant,NMD_transcript_variant
SANAD_LRR_univariate	chr16	78719414	drug_response	0.000615	0.703	0.357	WWOX	intron_variant;intron_variant,NMD_transcript_variant
SANAD_LRR_Joint_model	chr16	78721761	drug_response	-0.0282	0.00524	0.78	WWOX	intron_variant;intron_variant,NMD_transcript_variant
SANAD_LRR_univariate	chr16	78721761	drug_response	-0.0282	-0.125	0.823	WWOX	intron_variant;intron_variant,NMD_transcript_variant
SANAD_LRR_Joint_model	chr16	78724797	drug_response	-0.006	0.00546	0.714	WWOX	intron_variant;intron_variant,NMD_transcript_variant
SANAD_LRR_univariate	chr16	78724797	drug_response	-0.006	0.245	0.731	WWOX	intron_variant;intron_variant,NMD_transcript_variant
SANAD_LRR_Joint_model	chr16	78729062	drug_response	-0.0151	-0.014	0.389	WWOX	intron_variant;intron_variant,NMD_transcript_variant
SANAD_LRR_univariate	chr16	78729062	drug_response	-0.0151	-0.964	0.245	WWOX	intron_variant;intron_variant,NMD_transcript_variant
SANAD_LRR_Joint_model	chr16	78731449	drug_response	-0.0136	-0.00771	0.631	WWOX	intron_variant;intron_variant,NMD_transcript_variant
SANAD_LRR_univariate	chr16	78731449	drug_response	-0.0136	-0.454	0.511	WWOX	intron_variant;intron_variant,NMD_transcript_variant
SANAD_LRR_Joint_model	chr16	78733911	drug_response	0.00357	-0.00241	0.819	WWOX	intron_variant;intron_variant,NMD_transcript_variant
SANAD_LRR_univariate	chr16	78733911	drug_response	0.00357	-0.121	0.902	WWOX	intron_variant;intron_variant,NMD_transcript_variant
SANAD_LRR_Joint_model	chr16	78754687	drug_response	-0.00224	-0.00841	0.642	WWOX	intron_variant;intron_variant,NMD_transcript_variant
SANAD_LRR_univariate	chr16	78754687	drug_response	-0.00224	-0.0628	0.917	WWOX	intron_variant;intron_variant,NMD_transcript_variant
SANAD_LRR_Joint_model	chr16	78762822	drug_response	-0.0153	-0.0046	0.707	WWOX	intron_variant;intron_variant,NMD_transcript_variant
SANAD_LRR_univariate	chr16	78762822	drug_response	-0.0153	-1.12	0.199	WWOX	intron_variant;intron_variant,NMD_transcript_variant
SANAD_LRR_Joint_model	chr16	78769788	drug_response	0.00692	0.00783	0.611	WWOX	intron_variant;intron_variant,NMD_transcript_variant
SANAD_LRR_univariate	chr16	78769788	drug_response	0.00692	0.112	0.877	WWOX	intron_variant;intron_variant,NMD_transcript_variant
SANAD_LRR_Joint_model	chr16	78772582	drug_response	0.000556	0.00606	0.603	WWOX	intron_variant;intron_variant,NMD_transcript_variant
SANAD_LRR_univariate	chr16	78772582	drug_response	0.000556	0.496	0.606	WWOX	intron_variant;intron_variant,NMD_transcript_variant
SANAD_LRR_Joint_model	chr16	78776875	drug_response	0.00592	0.0017	0.895	WWOX	intron_variant;intron_variant,NMD_transcript_variant
SANAD_LRR_univariate	chr16	78776875	drug_response	0.00592	-0.104	0.896	WWOX	intron_variant;intron_variant,NMD_transcript_variant
SANAD_LRR_Joint_model	chr16	78784233	drug_response	0.00666	0.00185	0.866	WWOX	intron_variant;intron_variant,NMD_transcript_variant
SANAD_LRR_univariate	chr16	78784233	drug_response	0.00666	0.523	0.581	WWOX	intron_variant;intron_variant,NMD_transcript_variant
SANAD_LRR_Joint_model	chr16	78787891	drug_response	-0.0372	-0.00366	0.808	WWOX	intron_variant;intron_variant,NMD_transcript_variant
SANAD_LRR_univariate	chr16	78787891	drug_response	-0.0372	0.0464	0.946	WWOX	intron_variant;intron_variant,NMD_transcript_variant
SANAD_LRR_Joint_model	chr16	78790765	drug_response	0.0025	-0.011	0.537	WWOX	intron_variant;intron_variant,NMD_transcript_variant
SANAD_LRR_univariate	chr16	78790765	drug_response	0.0025	-0.51	0.445	WWOX	intron_variant;intron_variant,NMD_transcript_variant
SANAD_LRR_Joint_model	chr16	78797412	drug_response	-0.0235	0.00909	0.61	WWOX	intron_variant;intron_variant,NMD_transcript_variant
SANAD_LRR_univariate	chr16	78797412	drug_response	-0.0235	0.535	0.395	WWOX	intron_variant;intron_variant,NMD_transcript_variant
SANAD_LRR_Joint_model	chr16	78803489	drug_response	-0.0179	0.00537	0.74	WWOX	intron_variant;intron_variant,NMD_transcript_variant
SANAD_LRR_univariate	chr16	78803489	drug_response	-0.0179	0.297	0.65	WWOX	intron_variant;intron_variant,NMD_transcript_variant
SANAD_LRR_Joint_model	chr16	78807234	drug_response	5.09e-05	-0.0123	0.424	WWOX	intron_variant;intron_variant,NMD_transcript_variant
SANAD_LRR_univariate	chr16	78807234	drug_response	5.09e-05	-0.587	0.485	WWOX	intron_variant;intron_variant,NMD_transcript_variant
SANAD_LRR_Joint_model	chr16	78807334	drug_response	-0.000736	-0.00306	0.801	WWOX	intron_variant;intron_variant,NMD_transcript_variant
SANAD_LRR_univariate	chr16	78807334	drug_response	-0.000736	0.233	0.787	WWOX	intron_variant;intron_variant,NMD_transcript_variant
SANAD_LRR_Joint_model	chr16	78808383	drug_response	0.0147	0.0066	0.615	WWOX	intron_variant;intron_variant,NMD_transcript_variant
SANAD_LRR_univariate	chr16	78808383	drug_response	0.0147	0.122	0.885	WWOX	intron_variant;intron_variant,NMD_transcript_variant
SANAD_LRR_Joint_model	chr16	78809124	drug_response	0.000139	0.0134	0.45	WWOX	intron_variant;intron_variant,NMD_transcript_variant
SANAD_LRR_univariate	chr16	78809124	drug_response	0.000139	0.505	0.478	WWOX	intron_variant;intron_variant,NMD_transcript_variant
SANAD_LRR_Joint_model	chr16	78810298	drug_response	-0.00952	-0.0136	0.74	WWOX	intron_variant;intron_variant,NMD_transcript_variant
SANAD_LRR_univariate	chr16	78810298	drug_response	-0.00952	-0.247	0.339	WWOX	intron_variant;intron_variant,NMD_transcript_variant
SANAD_LRR_Joint_model	chr16	78812982	drug_response	-0.101	-0.0067	0.922	WWOX	intron_variant;intron_variant,NMD_transcript_variant
SANAD_LRR_univariate	chr16	78812982	drug_response	-0.101	-0.0912	0.535	WWOX	intron_variant;intron_variant,NMD_transcript_variant
SANAD_LRR_Joint_model	chr16	78814074	drug_response	0.00929	-0.00646	0.65	WWOX	intron_variant;intron_variant,NMD_transcript_variant
SANAD_LRR_univariate	chr16	78814074	drug_response	0.00929	-0.53	0.494	WWOX	intron_variant;intron_variant,NMD_transcript_variant
SANAD_LRR_Joint_model	chr16	78814454	drug_response	-0.0164	0.00944	0.528	WWOX	intron_variant;downstream_gene_variant;intron_variant,NMD_transcript_variant
SANAD_LRR_univariate	chr16	78814454	drug_response	-0.0164	1.12	0.157	WWOX	intron_variant;downstream_gene_variant;intron_variant,NMD_transcript_variant
SANAD_LRR_Joint_model	chr16	78815883	drug_response	0.0153	-0.00739	0.599	WWOX	intron_variant;downstream_gene_variant;intron_variant,NMD_transcript_variant
SANAD_LRR_univariate	chr16	78815883	drug_response	0.0153	-0.133	0.868	WWOX	intron_variant;downstream_gene_variant;intron_variant,NMD_transcript_variant
SANAD_LRR_Joint_model	chr16	78816421	drug_response	-0.000595	0.00676	0.631	WWOX	intron_variant;downstream_gene_variant;intron_variant,NMD_transcript_variant
SANAD_LRR_univariate	chr16	78816421	drug_response	-0.000595	0.274	0.728	WWOX	intron_variant;downstream_gene_variant;intron_variant,NMD_transcript_variant
SANAD_LRR_Joint_model	chr16	78817229	drug_response	0.0139	-0.00353	0.856	WWOX	intron_variant;downstream_gene_variant;intron_variant,NMD_transcript_variant
SANAD_LRR_univariate	chr16	78817229	drug_response	0.0139	-0.322	0.542	WWOX	intron_variant;downstream_gene_variant;intron_variant,NMD_transcript_variant
SANAD_LRR_Joint_model	chr16	78818322	drug_response	0.000884	0.0154	0.443	WWOX	intron_variant;downstream_gene_variant;intron_variant,NMD_transcript_variant
SANAD_LRR_univariate	chr16	78818322	drug_response	0.000884	0.167	0.791	WWOX	intron_variant;downstream_gene_variant;intron_variant,NMD_transcript_variant
SANAD_LRR_Joint_model	chr16	78819106	drug_response	-0.000488	0.0114	0.5	WWOX	intron_variant;downstream_gene_variant;intron_variant,NMD_transcript_variant
SANAD_LRR_univariate	chr16	78819106	drug_response	-0.000488	0.547	0.444	WWOX	intron_variant;downstream_gene_variant;intron_variant,NMD_transcript_variant
SANAD_LRR_Joint_model	chr16	78819227	drug_response	-0.00679	0.00367	0.831	WWOX	intron_variant;downstream_gene_variant;intron_variant,NMD_transcript_variant
SANAD_LRR_univariate	chr16	78819227	drug_response	-0.00679	0.35	0.561	WWOX	intron_variant;downstream_gene_variant;intron_variant,NMD_transcript_variant
SANAD_LRR_Joint_model	chr16	78822569	drug_response	-0.0114	0.0125	0.586	WWOX	intron_variant;intron_variant,NMD_transcript_variant
SANAD_LRR_univariate	chr16	78822569	drug_response	-0.0114	0.0865	0.86	WWOX	intron_variant;intron_variant,NMD_transcript_variant
SANAD_LRR_Joint_model	chr16	78823431	drug_response	-0.0278	-0.00397	0.841	WWOX	intron_variant;intron_variant,NMD_transcript_variant
SANAD_LRR_univariate	chr16	78823431	drug_response	-0.0278	-0.051	0.922	WWOX	intron_variant;intron_variant,NMD_transcript_variant
SANAD_LRR_Joint_model	chr16	78823734	drug_response	-0.00398	-0.0147	0.316	WWOX	intron_variant;intron_variant,NMD_transcript_variant
SANAD_LRR_univariate	chr16	78823734	drug_response	-0.00398	-2.11	0.0402	WWOX	intron_variant;intron_variant,NMD_transcript_variant
SANAD_LRR_Joint_model	chr16	78825139	drug_response	0.0234	0.0115	0.528	WWOX	intron_variant;intron_variant,NMD_transcript_variant
SANAD_LRR_univariate	chr16	78825139	drug_response	0.0234	0.298	0.643	WWOX	intron_variant;intron_variant,NMD_transcript_variant
SANAD_LRR_Joint_model	chr16	78825984	drug_response	0.012	0.0125	0.465	WWOX	intron_variant;intron_variant,NMD_transcript_variant
SANAD_LRR_univariate	chr16	78825984	drug_response	0.012	0.542	0.453	WWOX	intron_variant;intron_variant,NMD_transcript_variant
SANAD_LRR_Joint_model	chr16	78826195	drug_response	-0.0111	0.023	0.348	WWOX	intron_variant;intron_variant,NMD_transcript_variant
SANAD_LRR_univariate	chr16	78826195	drug_response	-0.0111	0.71	0.222	WWOX	intron_variant;intron_variant,NMD_transcript_variant
SANAD_LRR_Joint_model	chr16	78827865	drug_response	-0.00327	-0.00656	0.836	WWOX	intron_variant;intron_variant,NMD_transcript_variant
SANAD_LRR_univariate	chr16	78827865	drug_response	-0.00327	-0.0493	0.879	WWOX	intron_variant;intron_variant,NMD_transcript_variant
SANAD_LRR_Joint_model	chr16	78828545	drug_response	-0.0146	-0.00357	0.746	WWOX	intron_variant;intron_variant,NMD_transcript_variant
SANAD_LRR_univariate	chr16	78828545	drug_response	-0.0146	-0.859	0.371	WWOX	intron_variant;intron_variant,NMD_transcript_variant
SANAD_LRR_Joint_model	chr16	78829493	drug_response	0.00873	-0.00097	0.922	WWOX	intron_variant;intron_variant,NMD_transcript_variant
SANAD_LRR_univariate	chr16	78829493	drug_response	0.00873	-0.279	0.786	WWOX	intron_variant;intron_variant,NMD_transcript_variant
SANAD_LRR_Joint_model	chr16	78834624	drug_response	-0.00274	-0.000214	0.98	WWOX	intron_variant;intron_variant,NMD_transcript_variant
SANAD_LRR_univariate	chr16	78834624	drug_response	-0.00274	-0.424	0.723	WWOX	intron_variant;intron_variant,NMD_transcript_variant
SANAD_LRR_Joint_model	chr16	78837772	drug_response	-0.00811	0.000224	0.984	WWOX	intron_variant;intron_variant,NMD_transcript_variant
SANAD_LRR_univariate	chr16	78837772	drug_response	-0.00811	-0.158	0.86	WWOX	intron_variant;intron_variant,NMD_transcript_variant
SANAD_LRR_Joint_model	chr16	78839835	drug_response	0.00359	0.00323	0.79	WWOX	intron_variant;intron_variant,NMD_transcript_variant
SANAD_LRR_univariate	chr16	78839835	drug_response	0.00359	0.148	0.863	WWOX	intron_variant;intron_variant,NMD_transcript_variant
SANAD_LRR_Joint_model	chr16	78840745	drug_response	0.00662	-0.0175	0.313	WWOX	intron_variant;intron_variant,NMD_transcript_variant
SANAD_LRR_univariate	chr16	78840745	drug_response	0.00662	-1.31	0.131	WWOX	intron_variant;intron_variant,NMD_transcript_variant
SANAD_LRR_Joint_model	chr16	78841066	drug_response	-0.00669	-0.0117	0.404	WWOX	intron_variant;intron_variant,NMD_transcript_variant
SANAD_LRR_univariate	chr16	78841066	drug_response	-0.00669	-0.876	0.348	WWOX	intron_variant;intron_variant,NMD_transcript_variant
SANAD_LRR_Joint_model	chr16	78842436	drug_response	0.00135	-0.0172	0.305	WWOX	intron_variant;intron_variant,NMD_transcript_variant
SANAD_LRR_univariate	chr16	78842436	drug_response	0.00135	-1.65	0.069	WWOX	intron_variant;intron_variant,NMD_transcript_variant
SANAD_LRR_Joint_model	chr16	78843984	drug_response	-0.00795	-0.00152	0.895	WWOX	intron_variant;intron_variant,NMD_transcript_variant
SANAD_LRR_univariate	chr16	78843984	drug_response	-0.00795	-0.23	0.796	WWOX	intron_variant;intron_variant,NMD_transcript_variant
SANAD_LRR_Joint_model	chr16	78844830	drug_response	-0.00812	-0.00634	0.643	WWOX	intron_variant;intron_variant,NMD_transcript_variant
SANAD_LRR_univariate	chr16	78844830	drug_response	-0.00812	-0.5	0.535	WWOX	intron_variant;intron_variant,NMD_transcript_variant
SANAD_LRR_Joint_model	chr16	78848094	drug_response	-0.00774	0.0136	0.448	WWOX	intron_variant;intron_variant,NMD_transcript_variant
SANAD_LRR_univariate	chr16	78848094	drug_response	-0.00774	0.755	0.279	WWOX	intron_variant;intron_variant,NMD_transcript_variant
SANAD_LRR_Joint_model	chr16	78848731	drug_response	0.00489	-0.00644	0.711	WWOX	intron_variant;intron_variant,NMD_transcript_variant
SANAD_LRR_univariate	chr16	78848731	drug_response	0.00489	-0.383	0.531	WWOX	intron_variant;intron_variant,NMD_transcript_variant
SANAD_LRR_Joint_model	chr16	78852682	drug_response	-0.00809	0.00879	0.741	WWOX	intron_variant;intron_variant,NMD_transcript_variant
SANAD_LRR_univariate	chr16	78852682	drug_response	-0.00809	0.113	0.782	WWOX	intron_variant;intron_variant,NMD_transcript_variant
SANAD_LRR_Joint_model	chr16	78854228	drug_response	0.00862	0.00239	0.815	RPS3P7;WWOX	intron_variant;intron_variant,NMD_transcript_variant;upstream_gene_variant
SANAD_LRR_univariate	chr16	78854228	drug_response	0.00862	0.719	0.48	WWOX;RPS3P7	intron_variant;upstream_gene_variant;intron_variant,NMD_transcript_variant
SANAD_LRR_Joint_model	chr16	78854487	drug_response	0.00217	0.0125	0.391	RPS3P7;WWOX	intron_variant;intron_variant,NMD_transcript_variant;upstream_gene_variant
SANAD_LRR_univariate	chr16	78854487	drug_response	0.00217	1.41	0.124	WWOX;RPS3P7	intron_variant;upstream_gene_variant;intron_variant,NMD_transcript_variant
SANAD_LRR_Joint_model	chr16	78854528	drug_response	-0.0136	0.00708	0.71	RPS3P7;WWOX	intron_variant;intron_variant,NMD_transcript_variant;upstream_gene_variant
SANAD_LRR_univariate	chr16	78854528	drug_response	-0.0136	-0.164	0.77	WWOX;RPS3P7	intron_variant;upstream_gene_variant;intron_variant,NMD_transcript_variant
SANAD_LRR_Joint_model	chr16	78854871	drug_response	-0.000494	-0.0227	0.274	RPS3P7;WWOX	intron_variant;intron_variant,NMD_transcript_variant;upstream_gene_variant
SANAD_LRR_Joint_modelVS	chr16	78854871	drug_response	-0.000494	-0.0191	0.0395	RPS3P7;WWOX	upstream_gene_variant;intron_variant;intron_variant,NMD_transcript_variant
SANAD_LRR_univariate	chr16	78854871	drug_response	-0.000494	-1.58	0.0408	WWOX;RPS3P7	intron_variant;upstream_gene_variant;intron_variant,NMD_transcript_variant
SANAD_LRR_Joint_model	chr16	78857299	drug_response	0.00354	0.00542	0.641	RPS3P7;WWOX	intron_variant;intron_variant,NMD_transcript_variant;upstream_gene_variant
SANAD_LRR_univariate	chr16	78857299	drug_response	0.00354	1.12	0.235	WWOX;RPS3P7	intron_variant;upstream_gene_variant;intron_variant,NMD_transcript_variant
SANAD_LRR_Joint_model	chr16	78859130	drug_response	-0.006	0.00867	0.531	RPS3P7;WWOX	intron_variant;intron_variant,NMD_transcript_variant;upstream_gene_variant
SANAD_LRR_univariate	chr16	78859130	drug_response	-0.006	0.702	0.41	WWOX;RPS3P7	intron_variant;upstream_gene_variant;intron_variant,NMD_transcript_variant
SANAD_LRR_Joint_model	chr16	78860748	drug_response	0.00504	-0.0235	0.367	RPS3P7;WWOX	intron_variant;downstream_gene_variant;intron_variant,NMD_transcript_variant
SANAD_LRR_univariate	chr16	78860748	drug_response	0.00504	-0.894	0.0915	WWOX;RPS3P7	intron_variant;downstream_gene_variant;intron_variant,NMD_transcript_variant
SANAD_LRR_Joint_model	chr16	78860780	drug_response	0.00718	-0.00851	0.664	RPS3P7;WWOX	intron_variant;downstream_gene_variant;intron_variant,NMD_transcript_variant
SANAD_LRR_univariate	chr16	78860780	drug_response	0.00718	-0.362	0.517	WWOX;RPS3P7	intron_variant;downstream_gene_variant;intron_variant,NMD_transcript_variant
SANAD_LRR_Joint_model	chr16	78861356	drug_response	-0.017	-0.0186	0.556	RPS3P7;WWOX	intron_variant;downstream_gene_variant;intron_variant,NMD_transcript_variant
SANAD_LRR_univariate	chr16	78861356	drug_response	-0.017	-0.403	0.267	WWOX;RPS3P7	intron_variant;downstream_gene_variant;intron_variant,NMD_transcript_variant
SANAD_LRR_Joint_model	chr16	78861379	drug_response	0.0101	-0.000899	0.961	RPS3P7;WWOX	intron_variant;downstream_gene_variant;intron_variant,NMD_transcript_variant
SANAD_LRR_univariate	chr16	78861379	drug_response	0.0101	0.148	0.793	WWOX;RPS3P7	intron_variant;downstream_gene_variant;intron_variant,NMD_transcript_variant
SANAD_LRR_Joint_model	chr16	78863813	drug_response	0.00862	-0.0272	0.395	RPS3P7;WWOX	intron_variant;downstream_gene_variant;intron_variant,NMD_transcript_variant
SANAD_LRR_univariate	chr16	78863813	drug_response	0.00862	-0.457	0.269	WWOX;RPS3P7	intron_variant;downstream_gene_variant;intron_variant,NMD_transcript_variant
SANAD_LRR_Joint_model	chr16	78865890	drug_response	0.0131	-0.00371	0.773	WWOX	intron_variant;intron_variant,NMD_transcript_variant
SANAD_LRR_univariate	chr16	78865890	drug_response	0.0131	-0.792	0.325	WWOX	intron_variant;intron_variant,NMD_transcript_variant
SANAD_LRR_Joint_model	chr16	78867839	drug_response	-0.00567	-0.00315	0.793	WWOX	intron_variant;intron_variant,NMD_transcript_variant
SANAD_LRR_univariate	chr16	78867839	drug_response	-0.00567	-0.565	0.517	WWOX	intron_variant;intron_variant,NMD_transcript_variant
SANAD_LRR_Joint_model	chr16	78869317	drug_response	0.0146	-0.0276	0.382	WWOX	intron_variant;intron_variant,NMD_transcript_variant
SANAD_LRR_univariate	chr16	78869317	drug_response	0.0146	-0.422	0.324	WWOX	intron_variant;intron_variant,NMD_transcript_variant
SANAD_LRR_Joint_model	chr16	78869482	drug_response	-0.00502	-0.0065	0.674	WWOX	intron_variant;intron_variant,NMD_transcript_variant
SANAD_LRR_univariate	chr16	78869482	drug_response	-0.00502	-0.329	0.639	WWOX	intron_variant;intron_variant,NMD_transcript_variant
SANAD_LRR_Joint_model	chr16	78869972	drug_response	-0.0204	-0.00569	0.712	WWOX	intron_variant;intron_variant,NMD_transcript_variant
SANAD_LRR_univariate	chr16	78869972	drug_response	-0.0204	-0.266	0.704	WWOX	intron_variant;intron_variant,NMD_transcript_variant
SANAD_LRR_Joint_model	chr16	78870026	drug_response	0.00263	0.00315	0.774	WWOX	intron_variant;intron_variant,NMD_transcript_variant
SANAD_LRR_univariate	chr16	78870026	drug_response	0.00263	0.83	0.38	WWOX	intron_variant;intron_variant,NMD_transcript_variant
SANAD_LRR_Joint_model	chr16	78871055	drug_response	-9.61e-05	-0.0274	0.307	WWOX	intron_variant;intron_variant,NMD_transcript_variant
SANAD_LRR_univariate	chr16	78871055	drug_response	-9.61e-05	-1.17	0.0387	WWOX	intron_variant;intron_variant,NMD_transcript_variant
SANAD_LRR_Joint_model	chr16	78874740	drug_response	-0.00247	-0.0049	0.707	WWOX	intron_variant;intron_variant,NMD_transcript_variant
SANAD_LRR_univariate	chr16	78874740	drug_response	-0.00247	-0.314	0.705	WWOX	intron_variant;intron_variant,NMD_transcript_variant
SANAD_LRR_Joint_model	chr16	78875840	drug_response	-0.00568	0.00245	0.842	WWOX	intron_variant;intron_variant,NMD_transcript_variant
SANAD_LRR_univariate	chr16	78875840	drug_response	-0.00568	0.149	0.86	WWOX	intron_variant;intron_variant,NMD_transcript_variant
SANAD_LRR_Joint_model	chr16	78875927	drug_response	-0.0421	0.000818	0.976	WWOX	intron_variant;intron_variant,NMD_transcript_variant
SANAD_LRR_univariate	chr16	78875927	drug_response	-0.0421	-0.129	0.734	WWOX	intron_variant;intron_variant,NMD_transcript_variant
SANAD_LRR_Joint_model	chr16	78876980	drug_response	-0.0326	-0.0761	0.335	WWOX	intron_variant;intron_variant,NMD_transcript_variant
SANAD_LRR_univariate	chr16	78876980	drug_response	-0.0326	-0.296	0.0979	WWOX	intron_variant;intron_variant,NMD_transcript_variant
SANAD_LRR_Joint_model	chr16	78877048	drug_response	-0.00438	-0.0909	0.271	WWOX	intron_variant;intron_variant,NMD_transcript_variant
SANAD_LRR_univariate	chr16	78877048	drug_response	-0.00438	-0.376	0.052	WWOX	intron_variant;intron_variant,NMD_transcript_variant
SANAD_LRR_Joint_model	chr16	78877099	drug_response	-0.0317	-0.0681	0.367	WWOX	intron_variant;intron_variant,NMD_transcript_variant
SANAD_LRR_univariate	chr16	78877099	drug_response	-0.0317	-0.295	0.0982	WWOX	intron_variant;intron_variant,NMD_transcript_variant
SANAD_LRR_Joint_model	chr16	78877150	drug_response	-0.0422	-0.0689	0.417	WWOX	intron_variant;intron_variant,NMD_transcript_variant
SANAD_LRR_univariate	chr16	78877150	drug_response	-0.0422	-0.237	0.116	WWOX	intron_variant;intron_variant,NMD_transcript_variant
SANAD_LRR_Joint_model	chr16	78877201	drug_response	-0.0235	-0.0771	0.341	WWOX	intron_variant;intron_variant,NMD_transcript_variant
SANAD_LRR_univariate	chr16	78877201	drug_response	-0.0235	-0.344	0.0479	WWOX	intron_variant;intron_variant,NMD_transcript_variant
SANAD_LRR_Joint_model	chr16	78877255	drug_response	-0.0303	-0.0644	0.383	WWOX	intron_variant;intron_variant,NMD_transcript_variant
SANAD_LRR_univariate	chr16	78877255	drug_response	-0.0303	-0.265	0.137	WWOX	intron_variant;intron_variant,NMD_transcript_variant
SANAD_LRR_Joint_model	chr16	78877301	drug_response	-0.0432	-0.0626	0.431	WWOX	intron_variant;intron_variant,NMD_transcript_variant
SANAD_LRR_univariate	chr16	78877301	drug_response	-0.0432	-0.197	0.21	WWOX	intron_variant;intron_variant,NMD_transcript_variant
SANAD_LRR_Joint_model	chr16	78877403	drug_response	-0.0333	-0.0847	0.342	WWOX	intron_variant;intron_variant,NMD_transcript_variant
SANAD_LRR_univariate	chr16	78877403	drug_response	-0.0333	-0.309	0.0521	WWOX	intron_variant;intron_variant,NMD_transcript_variant
SANAD_LRR_Joint_model	chr16	78877418	drug_response	-0.0444	-0.0901	0.341	WWOX	intron_variant;intron_variant,NMD_transcript_variant
SANAD_LRR_univariate	chr16	78877418	drug_response	-0.0444	-0.256	0.0847	WWOX	intron_variant;intron_variant,NMD_transcript_variant
SANAD_LRR_Joint_model	chr16	78877604	drug_response	-0.0285	-0.0478	0.452	WWOX	intron_variant;intron_variant,NMD_transcript_variant
SANAD_LRR_univariate	chr16	78877604	drug_response	-0.0285	-0.259	0.176	WWOX	intron_variant;intron_variant,NMD_transcript_variant
SANAD_LRR_Joint_model	chr16	78877618	drug_response	0.024	-0.0238	0.348	WWOX	intron_variant;intron_variant,NMD_transcript_variant
SANAD_LRR_univariate	chr16	78877618	drug_response	0.024	-0.918	0.101	WWOX	intron_variant;intron_variant,NMD_transcript_variant
SANAD_LRR_Joint_model	chr16	78884154	drug_response	-0.00353	0.000651	0.955	WWOX	intron_variant;intron_variant,NMD_transcript_variant
SANAD_LRR_univariate	chr16	78884154	drug_response	-0.00353	-0.178	0.839	WWOX	intron_variant;intron_variant,NMD_transcript_variant
SANAD_LRR_Joint_model	chr16	78884366	drug_response	-0.00997	-0.0212	0.303	WWOX	intron_variant;intron_variant,NMD_transcript_variant
SANAD_LRR_univariate	chr16	78884366	drug_response	-0.00997	-0.943	0.203	WWOX	intron_variant;intron_variant,NMD_transcript_variant
SANAD_LRR_Joint_model	chr16	78888246	drug_response	-0.0118	-0.0102	0.603	WWOX	intron_variant;intron_variant,NMD_transcript_variant
SANAD_LRR_univariate	chr16	78888246	drug_response	-0.0118	-0.457	0.419	WWOX	intron_variant;intron_variant,NMD_transcript_variant
SANAD_LRR_Joint_model	chr16	78888387	drug_response	-0.0113	-0.0018	0.903	WWOX	intron_variant;intron_variant,NMD_transcript_variant
SANAD_LRR_univariate	chr16	78888387	drug_response	-0.0113	-0.243	0.724	WWOX	intron_variant;intron_variant,NMD_transcript_variant
SANAD_LRR_Joint_model	chr16	78891690	drug_response	-0.025	0.0119	0.57	WWOX	intron_variant;intron_variant,NMD_transcript_variant
SANAD_LRR_univariate	chr16	78891690	drug_response	-0.025	0.167	0.76	WWOX	intron_variant;intron_variant,NMD_transcript_variant
SANAD_LRR_Joint_model	chr16	78897381	drug_response	-0.00567	0.000624	0.955	WWOX	intron_variant;intron_variant,NMD_transcript_variant
SANAD_LRR_univariate	chr16	78897381	drug_response	-0.00567	-0.442	0.627	WWOX	intron_variant;intron_variant,NMD_transcript_variant
SANAD_LRR_Joint_model	chr16	78897506	drug_response	-0.00478	-0.00733	0.556	WWOX	intron_variant;intron_variant,NMD_transcript_variant
SANAD_LRR_univariate	chr16	78897506	drug_response	-0.00478	-0.922	0.322	WWOX	intron_variant;intron_variant,NMD_transcript_variant
SANAD_LRR_Joint_model	chr16	78897586	drug_response	0.0065	-0.0211	0.293	WWOX	intron_variant;intron_variant,NMD_transcript_variant
SANAD_LRR_univariate	chr16	78897586	drug_response	0.0065	-0.914	0.228	WWOX	intron_variant;intron_variant,NMD_transcript_variant
SANAD_LRR_Joint_model	chr16	78897742	drug_response	-0.00095	-0.00298	0.772	WWOX	intron_variant;intron_variant,NMD_transcript_variant
SANAD_LRR_univariate	chr16	78897742	drug_response	-0.00095	0.0775	0.939	WWOX	intron_variant;intron_variant,NMD_transcript_variant
SANAD_LRR_Joint_model	chr16	78901723	drug_response	0.00282	-0.00959	0.525	WWOX	intron_variant;intron_variant,NMD_transcript_variant
SANAD_LRR_univariate	chr16	78901723	drug_response	0.00282	-0.713	0.364	WWOX	intron_variant;intron_variant,NMD_transcript_variant
SANAD_LRR_Joint_model	chr16	78902601	drug_response	0.000525	-0.00559	0.612	WWOX	intron_variant;intron_variant,NMD_transcript_variant
SANAD_LRR_univariate	chr16	78902601	drug_response	0.000525	-0.348	0.731	WWOX	intron_variant;intron_variant,NMD_transcript_variant
SANAD_LRR_Joint_model	chr16	78904810	drug_response	-0.0256	-0.0407	0.275	WWOX	intron_variant;intron_variant,NMD_transcript_variant
SANAD_LRR_univariate	chr16	78904810	drug_response	-0.0256	-1.06	0.0141	WWOX	intron_variant;intron_variant,NMD_transcript_variant
SANAD_LRR_Joint_model	chr16	78911101	drug_response	0.00442	-0.0157	0.401	WWOX	intron_variant;intron_variant,NMD_transcript_variant
SANAD_LRR_univariate	chr16	78911101	drug_response	0.00442	-0.612	0.385	WWOX	intron_variant;intron_variant,NMD_transcript_variant
SANAD_LRR_Joint_model	chr16	78911326	drug_response	0.00467	-0.00136	0.921	WWOX	intron_variant;intron_variant,NMD_transcript_variant
SANAD_LRR_univariate	chr16	78911326	drug_response	0.00467	0.357	0.635	WWOX	intron_variant;intron_variant,NMD_transcript_variant
SANAD_LRR_Joint_model	chr16	78911336	drug_response	0.0154	-0.0101	0.47	WWOX	intron_variant;intron_variant,NMD_transcript_variant
SANAD_LRR_univariate	chr16	78911336	drug_response	0.0154	0.0687	0.937	WWOX	intron_variant;intron_variant,NMD_transcript_variant
SANAD_LRR_Joint_model	chr16	78913387	drug_response	-2.33e-05	-0.000761	0.949	WWOX	intron_variant;intron_variant,NMD_transcript_variant
SANAD_LRR_Joint_model	chr16	78913387	drug_response	-2.33e-05	-0.000761	0.949	WWOX	intron_variant;intron_variant,NMD_transcript_variant
SANAD_LRR_univariate	chr16	78913387	drug_response	-2.33e-05	0.0536	0.95	WWOX	intron_variant;intron_variant,NMD_transcript_variant
SANAD_LRR_univariate	chr16	78913387	drug_response	-2.33e-05	0.0536	0.95	WWOX	intron_variant;intron_variant,NMD_transcript_variant
SANAD_Genotype_Joint_model	chr16	78914000	drug_response	0.00464	-0.0177	0.247	WWOX	intron_variant;intron_variant,NMD_transcript_variant
SANAD_Genotype_Univariate	chr16	78914000	drug_response	0.00464	-3.33	0.00952	WWOX	intron_variant;intron_variant,NMD_transcript_variant
SANAD_LRR_Joint_model	chr16	78914000	drug_response	-0.0202	0.0118	0.475	WWOX	intron_variant;intron_variant,NMD_transcript_variant
SANAD_LRR_Joint_model	chr16	78914000	drug_response	-0.0202	0.0118	0.475	WWOX	intron_variant;intron_variant,NMD_transcript_variant
SANAD_LRR_univariate	chr16	78914000	drug_response	-0.0202	0.925	0.214	WWOX	intron_variant;intron_variant,NMD_transcript_variant
SANAD_LRR_univariate	chr16	78914000	drug_response	-0.0202	0.925	0.214	WWOX	intron_variant;intron_variant,NMD_transcript_variant
SANAD_Genotype_Joint_model	chr16	78916160	drug_response	0.00664	-0.0132	0.399	WWOX	intron_variant;intron_variant,NMD_transcript_variant
SANAD_Genotype_Univariate	chr16	78916160	drug_response	0.00664	-0.91	0.269	WWOX	intron_variant;intron_variant,NMD_transcript_variant
SANAD_LRR_Joint_model	chr16	78916160	drug_response	-0.00646	-0.0229	0.355	WWOX	intron_variant;intron_variant,NMD_transcript_variant
SANAD_LRR_Joint_model	chr16	78916160	drug_response	-0.00646	-0.0229	0.355	WWOX	intron_variant;intron_variant,NMD_transcript_variant
SANAD_LRR_univariate	chr16	78916160	drug_response	-0.00646	-0.847	0.135	WWOX	intron_variant;intron_variant,NMD_transcript_variant
SANAD_LRR_univariate	chr16	78916160	drug_response	-0.00646	-0.847	0.135	WWOX	intron_variant;intron_variant,NMD_transcript_variant
SANAD_Genotype_Joint_model	chr16	78916839	drug_response	0.00237	0.00247	0.268	WWOX	intron_variant;intron_variant,NMD_transcript_variant
SANAD_Genotype_Univariate	chr16	78916839	drug_response	0.00237	21.9	0.0171	WWOX	intron_variant;intron_variant,NMD_transcript_variant
SANAD_LRR_Joint_model	chr16	78916839	drug_response	0.00221	0.0107	0.578	WWOX	intron_variant;intron_variant,NMD_transcript_variant
SANAD_LRR_Joint_model	chr16	78916839	drug_response	0.00221	0.0107	0.578	WWOX	intron_variant;intron_variant,NMD_transcript_variant
SANAD_LRR_univariate	chr16	78916839	drug_response	0.00221	0.596	0.313	WWOX	intron_variant;intron_variant,NMD_transcript_variant
SANAD_LRR_univariate	chr16	78916839	drug_response	0.00221	0.596	0.313	WWOX	intron_variant;intron_variant,NMD_transcript_variant
SANAD_Genotype_Joint_model	chr16	78918596	drug_response	0.00296	0.000689	0.818	WWOX	intron_variant;intron_variant,NMD_transcript_variant
SANAD_Genotype_Univariate	chr16	78918596	drug_response	0.00296	1.93	0.582	WWOX	intron_variant;intron_variant,NMD_transcript_variant
SANAD_LRR_Joint_model	chr16	78918596	drug_response	-0.00411	-0.0056	0.695	WWOX	intron_variant;intron_variant,NMD_transcript_variant
SANAD_LRR_Joint_model	chr16	78918596	drug_response	-0.00411	-0.0056	0.695	WWOX	intron_variant;intron_variant,NMD_transcript_variant
SANAD_LRR_univariate	chr16	78918596	drug_response	-0.00411	-0.174	0.814	WWOX	intron_variant;intron_variant,NMD_transcript_variant
SANAD_LRR_univariate	chr16	78918596	drug_response	-0.00411	-0.174	0.814	WWOX	intron_variant;intron_variant,NMD_transcript_variant
SANAD_Genotype_Joint_model	chr16	78923074	drug_response	0.00018	1.08e-05	0.965	WWOX	intron_variant;intron_variant,NMD_transcript_variant
SANAD_Genotype_Univariate	chr16	78923074	drug_response	0.00018	-15.9	0.692	WWOX	intron_variant;intron_variant,NMD_transcript_variant
SANAD_LRR_Joint_model	chr16	78923074	drug_response	-0.00833	-0.00495	0.746	WWOX	intron_variant;intron_variant,NMD_transcript_variant
SANAD_LRR_Joint_model	chr16	78923074	drug_response	-0.00833	-0.00495	0.746	WWOX	intron_variant;intron_variant,NMD_transcript_variant
SANAD_LRR_univariate	chr16	78923074	drug_response	-0.00833	-0.0363	0.958	WWOX	intron_variant;intron_variant,NMD_transcript_variant
SANAD_LRR_univariate	chr16	78923074	drug_response	-0.00833	-0.0363	0.958	WWOX	intron_variant;intron_variant,NMD_transcript_variant
SANAD_Genotype_Joint_model	chr16	78923644	drug_response	7.46e-05	0.000543	0.476	WWOX	intron_variant;intron_variant,NMD_transcript_variant
SANAD_Genotype_Univariate	chr16	78923644	drug_response	7.46e-05	96.6	0.395	WWOX	intron_variant;intron_variant,NMD_transcript_variant
SANAD_LRR_Joint_model	chr16	78923644	drug_response	0.00505	0.000607	0.965	WWOX	intron_variant;intron_variant,NMD_transcript_variant
SANAD_LRR_Joint_model	chr16	78923644	drug_response	0.00505	0.000607	0.965	WWOX	intron_variant;intron_variant,NMD_transcript_variant
SANAD_LRR_univariate	chr16	78923644	drug_response	0.00505	0.692	0.351	WWOX	intron_variant;intron_variant,NMD_transcript_variant
SANAD_LRR_univariate	chr16	78923644	drug_response	0.00505	0.692	0.351	WWOX	intron_variant;intron_variant,NMD_transcript_variant
SANAD_Genotype_Joint_model	chr16	78926729	drug_response	0.000458	-9.22e-05	0.469	WWOX;RP11-319G9.3	upstream_gene_variant;intron_variant;intron_variant,NMD_transcript_variant
SANAD_Genotype_Univariate	chr16	78926729	drug_response	0.000458	-635	0.182	WWOX;RP11-319G9.3	upstream_gene_variant;intron_variant;intron_variant,NMD_transcript_variant
SANAD_LRR_Joint_model	chr16	78926729	drug_response	-0.00723	-0.0125	0.52	RP11-319G9.3;WWOX	intron_variant;intron_variant,NMD_transcript_variant;upstream_gene_variant
SANAD_LRR_Joint_model	chr16	78926729	drug_response	-0.00723	-0.0125	0.52	RP11-319G9.3;WWOX	intron_variant;intron_variant,NMD_transcript_variant;upstream_gene_variant
SANAD_LRR_univariate	chr16	78926729	drug_response	-0.00723	-0.439	0.469	WWOX;RP11-319G9.3	intron_variant;upstream_gene_variant;intron_variant,NMD_transcript_variant
SANAD_LRR_univariate	chr16	78926729	drug_response	-0.00723	-0.439	0.469	WWOX;RP11-319G9.3	intron_variant;upstream_gene_variant;intron_variant,NMD_transcript_variant
SANAD_Genotype_Joint_model	chr16	78929458	drug_response	0.000115	3.57e-05	0.82	WWOX;RP11-319G9.3	upstream_gene_variant;intron_variant;intron_variant,NMD_transcript_variant
SANAD_Genotype_Univariate	chr16	78929458	drug_response	0.000115	-10.1	0.878	WWOX;RP11-319G9.3	upstream_gene_variant;intron_variant;intron_variant,NMD_transcript_variant
SANAD_LRR_Joint_model	chr16	78929458	drug_response	-0.0032	-0.0132	0.373	RP11-319G9.3;WWOX	intron_variant;intron_variant,NMD_transcript_variant;upstream_gene_variant
SANAD_LRR_Joint_model	chr16	78929458	drug_response	-0.0032	-0.0132	0.373	RP11-319G9.3;WWOX	intron_variant;intron_variant,NMD_transcript_variant;upstream_gene_variant
SANAD_LRR_univariate	chr16	78929458	drug_response	-0.0032	-1.74	0.0633	WWOX;RP11-319G9.3	intron_variant;upstream_gene_variant;intron_variant,NMD_transcript_variant
SANAD_LRR_univariate	chr16	78929458	drug_response	-0.0032	-1.74	0.0633	WWOX;RP11-319G9.3	intron_variant;upstream_gene_variant;intron_variant,NMD_transcript_variant
SANAD_Genotype_Joint_model	chr16	78931679	drug_response	0.000716	0.000156	0.476	WWOX;RP11-319G9.3	non_coding_transcript_exon_variant;intron_variant;intron_variant,NMD_transcript_variant
SANAD_Genotype_Univariate	chr16	78931679	drug_response	0.000716	336	0.395	WWOX;RP11-319G9.3	intron_variant;non_coding_transcript_exon_variant;intron_variant,NMD_transcript_variant
SANAD_LRR_Joint_model	chr16	78931679	drug_response	-0.00638	0.00505	0.694	RP11-319G9.3;WWOX	non_coding_transcript_exon_variant;intron_variant;intron_variant,NMD_transcript_variant
SANAD_LRR_Joint_model	chr16	78931679	drug_response	-0.00638	0.00505	0.694	RP11-319G9.3;WWOX	non_coding_transcript_exon_variant;intron_variant;intron_variant,NMD_transcript_variant
SANAD_LRR_univariate	chr16	78931679	drug_response	-0.00638	0.334	0.688	WWOX;RP11-319G9.3	intron_variant;non_coding_transcript_exon_variant;intron_variant,NMD_transcript_variant
SANAD_LRR_univariate	chr16	78931679	drug_response	-0.00638	0.334	0.688	WWOX;RP11-319G9.3	intron_variant;non_coding_transcript_exon_variant;intron_variant,NMD_transcript_variant
SANAD_Genotype_Joint_model	chr16	78932378	drug_response	0.00158	-0.00177	0.63	WWOX;RP11-319G9.3	non_coding_transcript_exon_variant;intron_variant;intron_variant,NMD_transcript_variant
SANAD_Genotype_Univariate	chr16	78932378	drug_response	0.00158	-2.2	0.596	WWOX;RP11-319G9.3	intron_variant;non_coding_transcript_exon_variant;intron_variant,NMD_transcript_variant
SANAD_LRR_Joint_model	chr16	78932378	drug_response	-0.0186	-0.00072	0.959	RP11-319G9.3;WWOX	non_coding_transcript_exon_variant;intron_variant;intron_variant,NMD_transcript_variant
SANAD_LRR_Joint_model	chr16	78932378	drug_response	-0.0186	-0.00072	0.959	RP11-319G9.3;WWOX	non_coding_transcript_exon_variant;intron_variant;intron_variant,NMD_transcript_variant
SANAD_LRR_univariate	chr16	78932378	drug_response	-0.0186	-0.462	0.524	WWOX;RP11-319G9.3	intron_variant;non_coding_transcript_exon_variant;intron_variant,NMD_transcript_variant
SANAD_LRR_univariate	chr16	78932378	drug_response	-0.0186	-0.462	0.524	WWOX;RP11-319G9.3	intron_variant;non_coding_transcript_exon_variant;intron_variant,NMD_transcript_variant
SANAD_Genotype_Joint_model	chr16	78932938	drug_response	0.0101	0.00327	0.728	WWOX;RP11-319G9.3	non_coding_transcript_exon_variant;intron_variant;intron_variant,NMD_transcript_variant
SANAD_Genotype_Univariate	chr16	78932938	drug_response	0.0101	0.628	0.58	WWOX;RP11-319G9.3	intron_variant;non_coding_transcript_exon_variant;intron_variant,NMD_transcript_variant
SANAD_LRR_Joint_model	chr16	78932938	drug_response	-0.0438	-0.0361	0.418	RP11-319G9.3;WWOX	non_coding_transcript_exon_variant;intron_variant;intron_variant,NMD_transcript_variant
SANAD_LRR_Joint_model	chr16	78932938	drug_response	-0.0438	-0.0361	0.418	RP11-319G9.3;WWOX	non_coding_transcript_exon_variant;intron_variant;intron_variant,NMD_transcript_variant
SANAD_LRR_univariate	chr16	78932938	drug_response	-0.0438	-0.249	0.39	WWOX;RP11-319G9.3	intron_variant;non_coding_transcript_exon_variant;intron_variant,NMD_transcript_variant
SANAD_LRR_univariate	chr16	78932938	drug_response	-0.0438	-0.249	0.39	WWOX;RP11-319G9.3	intron_variant;non_coding_transcript_exon_variant;intron_variant,NMD_transcript_variant
SANAD_Genotype_Joint_model	chr16	78935730	drug_response	0.0127	0.00882	0.44	WWOX;RP11-319G9.3	downstream_gene_variant;intron_variant;intron_variant,NMD_transcript_variant
SANAD_Genotype_Univariate	chr16	78935730	drug_response	0.0127	2.34	0.0905	WWOX;RP11-319G9.3	downstream_gene_variant;intron_variant;intron_variant,NMD_transcript_variant
SANAD_LRR_Joint_model	chr16	78935730	drug_response	0.0321	0.00271	0.924	RP11-319G9.3;WWOX	intron_variant;downstream_gene_variant;intron_variant,NMD_transcript_variant
SANAD_LRR_Joint_model	chr16	78935730	drug_response	0.0321	0.00271	0.924	RP11-319G9.3;WWOX	intron_variant;downstream_gene_variant;intron_variant,NMD_transcript_variant
SANAD_LRR_univariate	chr16	78935730	drug_response	0.0321	-0.074	0.836	WWOX;RP11-319G9.3	intron_variant;downstream_gene_variant;intron_variant,NMD_transcript_variant
SANAD_LRR_univariate	chr16	78935730	drug_response	0.0321	-0.074	0.836	WWOX;RP11-319G9.3	intron_variant;downstream_gene_variant;intron_variant,NMD_transcript_variant
SANAD_Genotype_Joint_model	chr16	78936106	drug_response	0.00212	-0.000651	0.886	WWOX;RP11-319G9.3	downstream_gene_variant;intron_variant;intron_variant,NMD_transcript_variant
SANAD_Genotype_Univariate	chr16	78936106	drug_response	0.00212	-45.1	0.0334	WWOX;RP11-319G9.3	downstream_gene_variant;intron_variant;intron_variant,NMD_transcript_variant
SANAD_LRR_Joint_model	chr16	78936106	drug_response	-0.0139	0.0024	0.87	RP11-319G9.3;WWOX	intron_variant;downstream_gene_variant;intron_variant,NMD_transcript_variant
SANAD_LRR_Joint_model	chr16	78936106	drug_response	-0.0139	0.0024	0.87	RP11-319G9.3;WWOX	intron_variant;downstream_gene_variant;intron_variant,NMD_transcript_variant
SANAD_LRR_univariate	chr16	78936106	drug_response	-0.0139	-0.428	0.542	WWOX;RP11-319G9.3	intron_variant;downstream_gene_variant;intron_variant,NMD_transcript_variant
SANAD_LRR_univariate	chr16	78936106	drug_response	-0.0139	-0.428	0.542	WWOX;RP11-319G9.3	intron_variant;downstream_gene_variant;intron_variant,NMD_transcript_variant
SANAD_Genotype_Joint_model	chr16	78941771	drug_response	0.00284	7.47e-05	0.988	WWOX	intron_variant;intron_variant,NMD_transcript_variant
SANAD_Genotype_Univariate	chr16	78941771	drug_response	0.00284	-2.18	0.47	WWOX	intron_variant;intron_variant,NMD_transcript_variant
SANAD_LRR_Joint_model	chr16	78941771	drug_response	-0.00875	0.00935	0.501	WWOX	intron_variant;intron_variant,NMD_transcript_variant
SANAD_LRR_Joint_model	chr16	78941771	drug_response	-0.00875	0.00935	0.501	WWOX	intron_variant;intron_variant,NMD_transcript_variant
SANAD_LRR_univariate	chr16	78941771	drug_response	-0.00875	0.743	0.391	WWOX	intron_variant;intron_variant,NMD_transcript_variant
SANAD_LRR_univariate	chr16	78941771	drug_response	-0.00875	0.743	0.391	WWOX	intron_variant;intron_variant,NMD_transcript_variant
SANAD_Genotype_Joint_model	chr16	78943267	drug_response	0.00233	-0.0078	0.433	WWOX	intron_variant;intron_variant,NMD_transcript_variant
SANAD_Genotype_Univariate	chr16	78943267	drug_response	0.00233	-15.1	0.0527	WWOX	intron_variant;intron_variant,NMD_transcript_variant
SANAD_LRR_Joint_model	chr16	78943267	drug_response	-0.00081	0.000298	0.983	WWOX	intron_variant;intron_variant,NMD_transcript_variant
SANAD_LRR_Joint_model	chr16	78943267	drug_response	-0.00081	0.000298	0.983	WWOX	intron_variant;intron_variant,NMD_transcript_variant
SANAD_LRR_univariate	chr16	78943267	drug_response	-0.00081	-0.572	0.442	WWOX	intron_variant;intron_variant,NMD_transcript_variant
SANAD_LRR_univariate	chr16	78943267	drug_response	-0.00081	-0.572	0.442	WWOX	intron_variant;intron_variant,NMD_transcript_variant
SANAD_Genotype_Joint_model	chr16	78946211	drug_response	0.00386	-0.00303	0.667	WWOX	intron_variant;intron_variant,NMD_transcript_variant
SANAD_Genotype_Univariate	chr16	78946211	drug_response	0.00386	-0.875	0.579	WWOX	intron_variant;intron_variant,NMD_transcript_variant
SANAD_LRR_Joint_model	chr16	78946211	drug_response	0.00583	-0.00476	0.692	WWOX	intron_variant;intron_variant,NMD_transcript_variant
SANAD_LRR_Joint_model	chr16	78946211	drug_response	0.00583	-0.00476	0.692	WWOX	intron_variant;intron_variant,NMD_transcript_variant
SANAD_LRR_univariate	chr16	78946211	drug_response	0.00583	-0.187	0.834	WWOX	intron_variant;intron_variant,NMD_transcript_variant
SANAD_LRR_univariate	chr16	78946211	drug_response	0.00583	-0.187	0.834	WWOX	intron_variant;intron_variant,NMD_transcript_variant
SANAD_Genotype_Joint_model	chr16	78946587	drug_response	0.00479	0.00252	0.749	WWOX	intron_variant;intron_variant,NMD_transcript_variant
SANAD_Genotype_Univariate	chr16	78946587	drug_response	0.00479	-0.214	0.875	WWOX	intron_variant;intron_variant,NMD_transcript_variant
SANAD_LRR_Joint_model	chr16	78946587	drug_response	0.000265	-0.0125	0.533	WWOX	intron_variant;intron_variant,NMD_transcript_variant
SANAD_LRR_Joint_model	chr16	78946587	drug_response	0.000265	-0.0125	0.533	WWOX	intron_variant;intron_variant,NMD_transcript_variant
SANAD_LRR_univariate	chr16	78946587	drug_response	0.000265	-0.514	0.379	WWOX	intron_variant;intron_variant,NMD_transcript_variant
SANAD_LRR_univariate	chr16	78946587	drug_response	0.000265	-0.514	0.379	WWOX	intron_variant;intron_variant,NMD_transcript_variant
SANAD_Genotype_Joint_model	chr16	78949966	drug_response	0.00232	-2.31e-05	0.996	WWOX	intron_variant;intron_variant,NMD_transcript_variant
SANAD_Genotype_Univariate	chr16	78949966	drug_response	0.00232	-2.81	0.424	WWOX	intron_variant;intron_variant,NMD_transcript_variant
SANAD_LRR_Joint_model	chr16	78949966	drug_response	-0.0132	0.019	0.361	WWOX	intron_variant;intron_variant,NMD_transcript_variant
SANAD_LRR_Joint_model	chr16	78949966	drug_response	-0.0132	0.019	0.361	WWOX	intron_variant;intron_variant,NMD_transcript_variant
SANAD_LRR_univariate	chr16	78949966	drug_response	-0.0132	0.838	0.209	WWOX	intron_variant;intron_variant,NMD_transcript_variant
SANAD_LRR_univariate	chr16	78949966	drug_response	-0.0132	0.838	0.209	WWOX	intron_variant;intron_variant,NMD_transcript_variant
SANAD_Genotype_Joint_model	chr16	78951126	drug_response	0.00196	-0.000188	0.969	WWOX	intron_variant;intron_variant,NMD_transcript_variant
SANAD_Genotype_Univariate	chr16	78951126	drug_response	0.00196	-3.48	0.389	WWOX	intron_variant;intron_variant,NMD_transcript_variant
SANAD_LRR_Joint_model	chr16	78951126	drug_response	0.00498	0.00915	0.499	WWOX	intron_variant;intron_variant,NMD_transcript_variant
SANAD_LRR_Joint_model	chr16	78951126	drug_response	0.00498	0.00915	0.499	WWOX	intron_variant;intron_variant,NMD_transcript_variant
SANAD_LRR_univariate	chr16	78951126	drug_response	0.00498	0.731	0.414	WWOX	intron_variant;intron_variant,NMD_transcript_variant
SANAD_LRR_univariate	chr16	78951126	drug_response	0.00498	0.731	0.414	WWOX	intron_variant;intron_variant,NMD_transcript_variant
SANAD_Genotype_Joint_model	chr16	78952439	drug_response	0.00212	-0.00032	0.946	WWOX	intron_variant;intron_variant,NMD_transcript_variant
SANAD_Genotype_Univariate	chr16	78952439	drug_response	0.00212	-12.6	0.338	WWOX	intron_variant;intron_variant,NMD_transcript_variant
SANAD_LRR_Joint_model	chr16	78952439	drug_response	0.00768	-0.0127	0.418	WWOX	intron_variant;intron_variant,NMD_transcript_variant
SANAD_LRR_Joint_model	chr16	78952439	drug_response	0.00768	-0.0127	0.418	WWOX	intron_variant;intron_variant,NMD_transcript_variant
SANAD_LRR_univariate	chr16	78952439	drug_response	0.00768	-0.702	0.398	WWOX	intron_variant;intron_variant,NMD_transcript_variant
SANAD_LRR_univariate	chr16	78952439	drug_response	0.00768	-0.702	0.398	WWOX	intron_variant;intron_variant,NMD_transcript_variant
SANAD_Genotype_Joint_model	chr16	78954675	drug_response	0.000711	-0.000176	0.971	WWOX	intron_variant;intron_variant,NMD_transcript_variant
SANAD_Genotype_Univariate	chr16	78954675	drug_response	0.000711	-3.82	0.378	WWOX	intron_variant;intron_variant,NMD_transcript_variant
SANAD_LRR_Joint_model	chr16	78954675	drug_response	-0.0038	0.0121	0.434	WWOX	intron_variant;intron_variant,NMD_transcript_variant
SANAD_LRR_Joint_model	chr16	78954675	drug_response	-0.0038	0.0121	0.434	WWOX	intron_variant;intron_variant,NMD_transcript_variant
SANAD_LRR_univariate	chr16	78954675	drug_response	-0.0038	1.28	0.128	WWOX	intron_variant;intron_variant,NMD_transcript_variant
SANAD_LRR_univariate	chr16	78954675	drug_response	-0.0038	1.28	0.128	WWOX	intron_variant;intron_variant,NMD_transcript_variant
SANAD_Genotype_Joint_model	chr16	78955119	drug_response	0.000698	-0.000338	0.943	WWOX	intron_variant;intron_variant,NMD_transcript_variant
SANAD_Genotype_Univariate	chr16	78955119	drug_response	0.000698	-13.2	0.344	WWOX	intron_variant;intron_variant,NMD_transcript_variant
SANAD_LRR_Joint_model	chr16	78955119	drug_response	0.0135	-0.0102	0.573	WWOX	intron_variant;intron_variant,NMD_transcript_variant
SANAD_LRR_Joint_model	chr16	78955119	drug_response	0.0135	-0.0102	0.573	WWOX	intron_variant;intron_variant,NMD_transcript_variant
SANAD_LRR_univariate	chr16	78955119	drug_response	0.0135	-1.05	0.0972	WWOX	intron_variant;intron_variant,NMD_transcript_variant
SANAD_LRR_univariate	chr16	78955119	drug_response	0.0135	-1.05	0.0972	WWOX	intron_variant;intron_variant,NMD_transcript_variant
SANAD_Genotype_Joint_model	chr16	78955458	drug_response	0.000743	-0.000343	0.943	WWOX	intron_variant;intron_variant,NMD_transcript_variant
SANAD_Genotype_Univariate	chr16	78955458	drug_response	0.000743	-13	0.344	WWOX	intron_variant;intron_variant,NMD_transcript_variant
SANAD_LRR_Joint_model	chr16	78955458	drug_response	0.00337	-0.00214	0.908	WWOX	intron_variant;intron_variant,NMD_transcript_variant
SANAD_LRR_Joint_model	chr16	78955458	drug_response	0.00337	-0.00214	0.908	WWOX	intron_variant;intron_variant,NMD_transcript_variant
SANAD_LRR_univariate	chr16	78955458	drug_response	0.00337	0.0729	0.895	WWOX	intron_variant;intron_variant,NMD_transcript_variant
SANAD_LRR_univariate	chr16	78955458	drug_response	0.00337	0.0729	0.895	WWOX	intron_variant;intron_variant,NMD_transcript_variant
SANAD_LRR_Joint_model	chr16	78958477	drug_response	-0.00343	-0.00277	0.819	WWOX	intron_variant;intron_variant,NMD_transcript_variant
SANAD_LRR_Joint_model	chr16	78958477	drug_response	-0.00343	-0.00277	0.819	WWOX	intron_variant;intron_variant,NMD_transcript_variant
SANAD_LRR_univariate	chr16	78958477	drug_response	-0.00343	0.165	0.847	WWOX	intron_variant;intron_variant,NMD_transcript_variant
SANAD_LRR_univariate	chr16	78958477	drug_response	-0.00343	0.165	0.847	WWOX	intron_variant;intron_variant,NMD_transcript_variant
SANAD_LRR_Joint_model	chr16	78961207	drug_response	-0.0186	-0.00271	0.815	WWOX	intron_variant;intron_variant,NMD_transcript_variant
SANAD_LRR_Joint_model	chr16	78961207	drug_response	-0.0186	-0.00271	0.815	WWOX	intron_variant;intron_variant,NMD_transcript_variant
SANAD_LRR_univariate	chr16	78961207	drug_response	-0.0186	-0.894	0.32	WWOX	intron_variant;intron_variant,NMD_transcript_variant
SANAD_LRR_univariate	chr16	78961207	drug_response	-0.0186	-0.894	0.32	WWOX	intron_variant;intron_variant,NMD_transcript_variant
SANAD_LRR_Joint_model	chr16	78963768	drug_response	0.00512	-0.0143	0.353	WWOX	intron_variant;intron_variant,NMD_transcript_variant
SANAD_LRR_Joint_model	chr16	78963768	drug_response	0.00512	-0.0143	0.353	WWOX	intron_variant;intron_variant,NMD_transcript_variant
SANAD_LRR_univariate	chr16	78963768	drug_response	0.00512	-1.4	0.127	WWOX	intron_variant;intron_variant,NMD_transcript_variant
SANAD_LRR_univariate	chr16	78963768	drug_response	0.00512	-1.4	0.127	WWOX	intron_variant;intron_variant,NMD_transcript_variant
SANAD_LRR_Joint_model	chr16	78965188	drug_response	0.00673	0.0104	0.478	WWOX	intron_variant;intron_variant,NMD_transcript_variant
SANAD_LRR_Joint_model	chr16	78965188	drug_response	0.00673	0.0104	0.478	WWOX	intron_variant;intron_variant,NMD_transcript_variant
SANAD_LRR_univariate	chr16	78965188	drug_response	0.00673	0.485	0.563	WWOX	intron_variant;intron_variant,NMD_transcript_variant
SANAD_LRR_univariate	chr16	78965188	drug_response	0.00673	0.485	0.563	WWOX	intron_variant;intron_variant,NMD_transcript_variant
SANAD_LRR_Joint_model	chr16	78966197	drug_response	0.0276	-0.00526	0.771	WWOX	intron_variant;intron_variant,NMD_transcript_variant
SANAD_LRR_Joint_model	chr16	78966197	drug_response	0.0276	-0.00526	0.771	WWOX	intron_variant;intron_variant,NMD_transcript_variant
SANAD_LRR_univariate	chr16	78966197	drug_response	0.0276	0.0912	0.875	WWOX	intron_variant;intron_variant,NMD_transcript_variant
SANAD_LRR_univariate	chr16	78966197	drug_response	0.0276	0.0912	0.875	WWOX	intron_variant;intron_variant,NMD_transcript_variant
SANAD_LRR_Joint_model	chr16	78966935	drug_response	-0.00307	-0.00579	0.672	WWOX	intron_variant;intron_variant,NMD_transcript_variant
SANAD_LRR_Joint_model	chr16	78966935	drug_response	-0.00307	-0.00579	0.672	WWOX	intron_variant;intron_variant,NMD_transcript_variant
SANAD_LRR_univariate	chr16	78966935	drug_response	-0.00307	-0.653	0.41	WWOX	intron_variant;intron_variant,NMD_transcript_variant
SANAD_LRR_univariate	chr16	78966935	drug_response	-0.00307	-0.653	0.41	WWOX	intron_variant;intron_variant,NMD_transcript_variant
SANAD_LRR_Joint_model	chr16	78969981	drug_response	0.00248	-0.0064	0.614	WWOX	intron_variant;intron_variant,NMD_transcript_variant
SANAD_LRR_Joint_model	chr16	78969981	drug_response	0.00248	-0.0064	0.614	WWOX	intron_variant;intron_variant,NMD_transcript_variant
SANAD_LRR_univariate	chr16	78969981	drug_response	0.00248	-0.914	0.3	WWOX	intron_variant;intron_variant,NMD_transcript_variant
SANAD_LRR_univariate	chr16	78969981	drug_response	0.00248	-0.914	0.3	WWOX	intron_variant;intron_variant,NMD_transcript_variant
SANAD_LRR_Joint_model	chr16	78970051	drug_response	-0.0005	0.00751	0.61	WWOX	intron_variant;intron_variant,NMD_transcript_variant
SANAD_LRR_Joint_model	chr16	78970051	drug_response	-0.0005	0.00751	0.61	WWOX	intron_variant;intron_variant,NMD_transcript_variant
SANAD_LRR_univariate	chr16	78970051	drug_response	-0.0005	0.504	0.501	WWOX	intron_variant;intron_variant,NMD_transcript_variant
SANAD_LRR_univariate	chr16	78970051	drug_response	-0.0005	0.504	0.501	WWOX	intron_variant;intron_variant,NMD_transcript_variant
SANAD_Genotype_Joint_model	chr16	78972995	drug_response	0.00231	-0.00412	0.567	WWOX	intron_variant;intron_variant,NMD_transcript_variant
SANAD_Genotype_Univariate	chr16	78972995	drug_response	0.00231	-7.74	0.0152	WWOX	intron_variant;intron_variant,NMD_transcript_variant
SANAD_LRR_Joint_model	chr16	78972995	drug_response	0.0122	0.00543	0.653	WWOX	intron_variant;intron_variant,NMD_transcript_variant
SANAD_LRR_Joint_model	chr16	78972995	drug_response	0.0122	0.00543	0.653	WWOX	intron_variant;intron_variant,NMD_transcript_variant
SANAD_LRR_univariate	chr16	78972995	drug_response	0.0122	0.224	0.805	WWOX	intron_variant;intron_variant,NMD_transcript_variant
SANAD_LRR_univariate	chr16	78972995	drug_response	0.0122	0.224	0.805	WWOX	intron_variant;intron_variant,NMD_transcript_variant
SANAD_Genotype_Joint_model	chr16	78973220	drug_response	0.0145	-0.00546	0.614	WWOX	intron_variant;intron_variant,NMD_transcript_variant
SANAD_Genotype_Univariate	chr16	78973220	drug_response	0.0145	-0.893	0.379	WWOX	intron_variant;intron_variant,NMD_transcript_variant
SANAD_LRR_Joint_model	chr16	78973220	drug_response	-0.0212	-0.0333	0.468	WWOX	intron_variant;intron_variant,NMD_transcript_variant
SANAD_LRR_Joint_model	chr16	78973220	drug_response	-0.0212	-0.0333	0.468	WWOX	intron_variant;intron_variant,NMD_transcript_variant
SANAD_LRR_univariate	chr16	78973220	drug_response	-0.0212	-0.314	0.244	WWOX	intron_variant;intron_variant,NMD_transcript_variant
SANAD_LRR_univariate	chr16	78973220	drug_response	-0.0212	-0.314	0.244	WWOX	intron_variant;intron_variant,NMD_transcript_variant
SANAD_Genotype_Joint_model	chr16	78973581	drug_response	0.0136	-0.00517	0.611	WWOX	intron_variant;intron_variant,NMD_transcript_variant
SANAD_Genotype_Univariate	chr16	78973581	drug_response	0.0136	-0.49	0.652	WWOX	intron_variant;intron_variant,NMD_transcript_variant
SANAD_LRR_Joint_model	chr16	78973581	drug_response	-0.0195	-0.0231	0.506	WWOX	intron_variant;intron_variant,NMD_transcript_variant
SANAD_LRR_Joint_model	chr16	78973581	drug_response	-0.0195	-0.0231	0.506	WWOX	intron_variant;intron_variant,NMD_transcript_variant
SANAD_LRR_univariate	chr16	78973581	drug_response	-0.0195	-0.35	0.312	WWOX	intron_variant;intron_variant,NMD_transcript_variant
SANAD_LRR_univariate	chr16	78973581	drug_response	-0.0195	-0.35	0.312	WWOX	intron_variant;intron_variant,NMD_transcript_variant
SANAD_Genotype_Joint_model	chr16	78973829	drug_response	0.0111	-0.00522	0.593	WWOX	intron_variant;intron_variant,NMD_transcript_variant
SANAD_Genotype_Univariate	chr16	78973829	drug_response	0.0111	-0.904	0.421	WWOX	intron_variant;intron_variant,NMD_transcript_variant
SANAD_LRR_Joint_model	chr16	78973829	drug_response	-0.000876	0.0121	0.514	WWOX	intron_variant;intron_variant,NMD_transcript_variant
SANAD_LRR_Joint_model	chr16	78973829	drug_response	-0.000876	0.0121	0.514	WWOX	intron_variant;intron_variant,NMD_transcript_variant
SANAD_LRR_univariate	chr16	78973829	drug_response	-0.000876	0.183	0.775	WWOX	intron_variant;intron_variant,NMD_transcript_variant
SANAD_LRR_univariate	chr16	78973829	drug_response	-0.000876	0.183	0.775	WWOX	intron_variant;intron_variant,NMD_transcript_variant
SANAD_Genotype_Joint_model	chr16	78973967	drug_response	0.0139	-0.00976	0.457	WWOX	intron_variant;intron_variant,NMD_transcript_variant
SANAD_Genotype_Univariate	chr16	78973967	drug_response	0.0139	-1.05	0.259	WWOX	intron_variant;intron_variant,NMD_transcript_variant
SANAD_LRR_Joint_model	chr16	78973967	drug_response	-0.00899	-0.0538	0.282	WWOX	intron_variant;intron_variant,NMD_transcript_variant
SANAD_LRR_Joint_model	chr16	78973967	drug_response	-0.00899	-0.0538	0.282	WWOX	intron_variant;intron_variant,NMD_transcript_variant
SANAD_LRR_univariate	chr16	78973967	drug_response	-0.00899	-0.884	0.00547	WWOX	intron_variant;intron_variant,NMD_transcript_variant
SANAD_LRR_univariate	chr16	78973967	drug_response	-0.00899	-0.884	0.00547	WWOX	intron_variant;intron_variant,NMD_transcript_variant
SANAD_Genotype_Joint_model	chr16	78974640	drug_response	0.0162	-0.00213	0.827	WWOX	intron_variant;intron_variant,NMD_transcript_variant
SANAD_Genotype_Univariate	chr16	78974640	drug_response	0.0162	-0.168	0.874	WWOX	intron_variant;intron_variant,NMD_transcript_variant
SANAD_LRR_Joint_model	chr16	78974640	drug_response	-0.0362	0.0189	0.556	WWOX	intron_variant;intron_variant,NMD_transcript_variant
SANAD_LRR_Joint_model	chr16	78974640	drug_response	-0.0362	0.0189	0.556	WWOX	intron_variant;intron_variant,NMD_transcript_variant
SANAD_LRR_univariate	chr16	78974640	drug_response	-0.0362	0.241	0.508	WWOX	intron_variant;intron_variant,NMD_transcript_variant
SANAD_LRR_univariate	chr16	78974640	drug_response	-0.0362	0.241	0.508	WWOX	intron_variant;intron_variant,NMD_transcript_variant
SANAD_Genotype_Joint_model	chr16	78975007	drug_response	0.013	-0.0027	0.834	WWOX	intron_variant;intron_variant,NMD_transcript_variant
SANAD_Genotype_Univariate	chr16	78975007	drug_response	0.013	-0.47	0.55	WWOX	intron_variant;intron_variant,NMD_transcript_variant
SANAD_LRR_Joint_model	chr16	78975007	drug_response	-0.00423	-0.0106	0.678	WWOX	intron_variant;intron_variant,NMD_transcript_variant
SANAD_LRR_Joint_model	chr16	78975007	drug_response	-0.00423	-0.0106	0.678	WWOX	intron_variant;intron_variant,NMD_transcript_variant
SANAD_LRR_univariate	chr16	78975007	drug_response	-0.00423	-0.139	0.746	WWOX	intron_variant;intron_variant,NMD_transcript_variant
SANAD_LRR_univariate	chr16	78975007	drug_response	-0.00423	-0.139	0.746	WWOX	intron_variant;intron_variant,NMD_transcript_variant
SANAD_Genotype_Joint_model	chr16	78975103	drug_response	0.00906	-0.00325	0.744	WWOX	intron_variant;intron_variant,NMD_transcript_variant
SANAD_Genotype_Univariate	chr16	78975103	drug_response	0.00906	-0.997	0.328	WWOX	intron_variant;intron_variant,NMD_transcript_variant
SANAD_LRR_Joint_model	chr16	78975103	drug_response	0.00203	0.000774	0.955	WWOX	intron_variant;intron_variant,NMD_transcript_variant
SANAD_LRR_Joint_model	chr16	78975103	drug_response	0.00203	0.000774	0.955	WWOX	intron_variant;intron_variant,NMD_transcript_variant
SANAD_LRR_univariate	chr16	78975103	drug_response	0.00203	0.0252	0.973	WWOX	intron_variant;intron_variant,NMD_transcript_variant
SANAD_LRR_univariate	chr16	78975103	drug_response	0.00203	0.0252	0.973	WWOX	intron_variant;intron_variant,NMD_transcript_variant
SANAD_LRR_Joint_model	chr16	78975384	drug_response	-0.0147	-0.0246	0.4	WWOX	intron_variant;intron_variant,NMD_transcript_variant
SANAD_LRR_Joint_model	chr16	78975384	drug_response	-0.0147	-0.0246	0.4	WWOX	intron_variant;intron_variant,NMD_transcript_variant
SANAD_LRR_univariate	chr16	78975384	drug_response	-0.0147	-0.698	0.131	WWOX	intron_variant;intron_variant,NMD_transcript_variant
SANAD_LRR_univariate	chr16	78975384	drug_response	-0.0147	-0.698	0.131	WWOX	intron_variant;intron_variant,NMD_transcript_variant
SANAD_Genotype_Joint_model	chr16	78975940	drug_response	0.00872	-0.00605	0.606	WWOX	intron_variant;intron_variant,NMD_transcript_variant
SANAD_Genotype_Univariate	chr16	78975940	drug_response	0.00872	-0.406	0.666	WWOX	intron_variant;intron_variant,NMD_transcript_variant
SANAD_LRR_Joint_model	chr16	78975940	drug_response	-0.0176	-0.000146	0.994	WWOX	intron_variant;intron_variant,NMD_transcript_variant
SANAD_LRR_Joint_model	chr16	78975940	drug_response	-0.0176	-0.000146	0.994	WWOX	intron_variant;intron_variant,NMD_transcript_variant
SANAD_LRR_univariate	chr16	78975940	drug_response	-0.0176	-0.211	0.671	WWOX	intron_variant;intron_variant,NMD_transcript_variant
SANAD_LRR_univariate	chr16	78975940	drug_response	-0.0176	-0.211	0.671	WWOX	intron_variant;intron_variant,NMD_transcript_variant
SANAD_Genotype_Joint_model	chr16	78976051	drug_response	0.00872	-0.00601	0.609	WWOX	intron_variant;intron_variant,NMD_transcript_variant
SANAD_Genotype_Univariate	chr16	78976051	drug_response	0.00872	-0.402	0.668	WWOX	intron_variant;intron_variant,NMD_transcript_variant
SANAD_LRR_Joint_model	chr16	78976051	drug_response	-0.00101	-0.0077	0.545	WWOX	intron_variant;intron_variant,NMD_transcript_variant
SANAD_LRR_Joint_model	chr16	78976051	drug_response	-0.00101	-0.0077	0.545	WWOX	intron_variant;intron_variant,NMD_transcript_variant
SANAD_LRR_univariate	chr16	78976051	drug_response	-0.00101	-0.651	0.475	WWOX	intron_variant;intron_variant,NMD_transcript_variant
SANAD_LRR_univariate	chr16	78976051	drug_response	-0.00101	-0.651	0.475	WWOX	intron_variant;intron_variant,NMD_transcript_variant
SANAD_Genotype_Joint_model	chr16	78976402	drug_response	0.00854	-0.00563	0.639	WWOX	intron_variant;intron_variant,NMD_transcript_variant
SANAD_Genotype_Univariate	chr16	78976402	drug_response	0.00854	-0.193	0.834	WWOX	intron_variant;intron_variant,NMD_transcript_variant
SANAD_LRR_Joint_model	chr16	78976402	drug_response	-0.0171	-0.00576	0.811	WWOX	intron_variant;intron_variant,NMD_transcript_variant
SANAD_LRR_Joint_model	chr16	78976402	drug_response	-0.0171	-0.00576	0.811	WWOX	intron_variant;intron_variant,NMD_transcript_variant
SANAD_LRR_univariate	chr16	78976402	drug_response	-0.0171	-0.204	0.638	WWOX	intron_variant;intron_variant,NMD_transcript_variant
SANAD_LRR_univariate	chr16	78976402	drug_response	-0.0171	-0.204	0.638	WWOX	intron_variant;intron_variant,NMD_transcript_variant
SANAD_Genotype_Joint_model	chr16	78976479	drug_response	0.00769	-0.0118	0.325	WWOX	intron_variant;intron_variant,NMD_transcript_variant
SANAD_Genotype_Univariate	chr16	78976479	drug_response	0.00769	-1.38	0.246	WWOX	intron_variant;intron_variant,NMD_transcript_variant
SANAD_LRR_Joint_model	chr16	78976479	drug_response	-0.004	-0.0237	0.375	WWOX	intron_variant;intron_variant,NMD_transcript_variant
SANAD_LRR_Joint_model	chr16	78976479	drug_response	-0.004	-0.0237	0.375	WWOX	intron_variant;intron_variant,NMD_transcript_variant
SANAD_LRR_univariate	chr16	78976479	drug_response	-0.004	-0.0537	0.916	WWOX	intron_variant;intron_variant,NMD_transcript_variant
SANAD_LRR_univariate	chr16	78976479	drug_response	-0.004	-0.0537	0.916	WWOX	intron_variant;intron_variant,NMD_transcript_variant
SANAD_Genotype_Joint_model	chr16	78977410	drug_response	0.00816	-0.00598	0.61	WWOX	intron_variant;intron_variant,NMD_transcript_variant
SANAD_Genotype_Univariate	chr16	78977410	drug_response	0.00816	-0.406	0.666	WWOX	intron_variant;intron_variant,NMD_transcript_variant
SANAD_LRR_Joint_model	chr16	78977410	drug_response	-0.00977	0.00601	0.831	WWOX	intron_variant;intron_variant,NMD_transcript_variant
SANAD_LRR_Joint_model	chr16	78977410	drug_response	-0.00977	0.00601	0.831	WWOX	intron_variant;intron_variant,NMD_transcript_variant
SANAD_LRR_univariate	chr16	78977410	drug_response	-0.00977	-0.146	0.695	WWOX	intron_variant;intron_variant,NMD_transcript_variant
SANAD_LRR_univariate	chr16	78977410	drug_response	-0.00977	-0.146	0.695	WWOX	intron_variant;intron_variant,NMD_transcript_variant
SANAD_Genotype_Joint_model	chr16	78977655	drug_response	0.0115	-0.00911	0.518	WWOX	intron_variant;intron_variant,NMD_transcript_variant
SANAD_Genotype_Univariate	chr16	78977655	drug_response	0.0115	-0.599	0.463	WWOX	intron_variant;intron_variant,NMD_transcript_variant
SANAD_LRR_Joint_model	chr16	78977655	drug_response	0.0259	-0.00649	0.784	WWOX	intron_variant;intron_variant,NMD_transcript_variant
SANAD_LRR_Joint_model	chr16	78977655	drug_response	0.0259	-0.00649	0.784	WWOX	intron_variant;intron_variant,NMD_transcript_variant
SANAD_LRR_univariate	chr16	78977655	drug_response	0.0259	-0.0796	0.856	WWOX	intron_variant;intron_variant,NMD_transcript_variant
SANAD_LRR_univariate	chr16	78977655	drug_response	0.0259	-0.0796	0.856	WWOX	intron_variant;intron_variant,NMD_transcript_variant
SANAD_LRR_Joint_model	chr16	78978052	drug_response	0.00107	0.0122	0.449	WWOX	intron_variant;intron_variant,NMD_transcript_variant
SANAD_LRR_Joint_model	chr16	78978052	drug_response	0.00107	0.0122	0.449	WWOX	intron_variant;intron_variant,NMD_transcript_variant
SANAD_LRR_univariate	chr16	78978052	drug_response	0.00107	0.604	0.441	WWOX	intron_variant;intron_variant,NMD_transcript_variant
SANAD_LRR_univariate	chr16	78978052	drug_response	0.00107	0.604	0.441	WWOX	intron_variant;intron_variant,NMD_transcript_variant
SANAD_Genotype_Joint_model	chr16	78978277	drug_response	0.00134	-0.000125	0.974	WWOX	intron_variant;intron_variant,NMD_transcript_variant
SANAD_Genotype_Univariate	chr16	78978277	drug_response	0.00134	859	0.0709	WWOX	intron_variant;intron_variant,NMD_transcript_variant
SANAD_LRR_Joint_model	chr16	78978277	drug_response	-0.00323	0.00345	0.802	WWOX	intron_variant;intron_variant,NMD_transcript_variant
SANAD_LRR_Joint_model	chr16	78978277	drug_response	-0.00323	0.00345	0.802	WWOX	intron_variant;intron_variant,NMD_transcript_variant
SANAD_LRR_univariate	chr16	78978277	drug_response	-0.00323	0.942	0.217	WWOX	intron_variant;intron_variant,NMD_transcript_variant
SANAD_LRR_univariate	chr16	78978277	drug_response	-0.00323	0.942	0.217	WWOX	intron_variant;intron_variant,NMD_transcript_variant
SANAD_LRR_Joint_model	chr16	78979488	drug_response	-0.0126	0.00607	0.653	WWOX	intron_variant;intron_variant,NMD_transcript_variant
SANAD_LRR_Joint_model	chr16	78979488	drug_response	-0.0126	0.00607	0.653	WWOX	intron_variant;intron_variant,NMD_transcript_variant
SANAD_LRR_univariate	chr16	78979488	drug_response	-0.0126	0.142	0.861	WWOX	intron_variant;intron_variant,NMD_transcript_variant
SANAD_LRR_univariate	chr16	78979488	drug_response	-0.0126	0.142	0.861	WWOX	intron_variant;intron_variant,NMD_transcript_variant
SANAD_LRR_Joint_model	chr16	78982335	drug_response	-0.0183	0.0153	0.435	WWOX	intron_variant;intron_variant,NMD_transcript_variant
SANAD_LRR_Joint_model	chr16	78982335	drug_response	-0.0183	0.0153	0.435	WWOX	intron_variant;intron_variant,NMD_transcript_variant
SANAD_LRR_univariate	chr16	78982335	drug_response	-0.0183	0.717	0.271	WWOX	intron_variant;intron_variant,NMD_transcript_variant
SANAD_LRR_univariate	chr16	78982335	drug_response	-0.0183	0.717	0.271	WWOX	intron_variant;intron_variant,NMD_transcript_variant
SANAD_LRR_Joint_model	chr16	78984136	drug_response	-0.00989	-0.00228	0.836	WWOX	intron_variant;intron_variant,NMD_transcript_variant
SANAD_LRR_Joint_model	chr16	78984136	drug_response	-0.00989	-0.00228	0.836	WWOX	intron_variant;intron_variant,NMD_transcript_variant
SANAD_LRR_univariate	chr16	78984136	drug_response	-0.00989	-0.566	0.547	WWOX	intron_variant;intron_variant,NMD_transcript_variant
SANAD_LRR_univariate	chr16	78984136	drug_response	-0.00989	-0.566	0.547	WWOX	intron_variant;intron_variant,NMD_transcript_variant
SANAD_LRR_Joint_model	chr16	78984750	drug_response	0.00241	0.00588	0.62	WWOX	intron_variant;intron_variant,NMD_transcript_variant
SANAD_LRR_Joint_model	chr16	78984750	drug_response	0.00241	0.00588	0.62	WWOX	intron_variant;intron_variant,NMD_transcript_variant
SANAD_LRR_univariate	chr16	78984750	drug_response	0.00241	0.9	0.338	WWOX	intron_variant;intron_variant,NMD_transcript_variant
SANAD_LRR_univariate	chr16	78984750	drug_response	0.00241	0.9	0.338	WWOX	intron_variant;intron_variant,NMD_transcript_variant
SANAD_LRR_Joint_model	chr16	78985073	drug_response	-0.00227	-0.00654	0.616	WWOX	intron_variant;intron_variant,NMD_transcript_variant
SANAD_LRR_Joint_model	chr16	78985073	drug_response	-0.00227	-0.00654	0.616	WWOX	intron_variant;intron_variant,NMD_transcript_variant
SANAD_LRR_univariate	chr16	78985073	drug_response	-0.00227	-0.816	0.335	WWOX	intron_variant;intron_variant,NMD_transcript_variant
SANAD_LRR_univariate	chr16	78985073	drug_response	-0.00227	-0.816	0.335	WWOX	intron_variant;intron_variant,NMD_transcript_variant
SANAD_LRR_Joint_model	chr16	78988988	drug_response	-0.00222	-0.0035	0.843	WWOX	intron_variant;intron_variant,NMD_transcript_variant
SANAD_LRR_Joint_model	chr16	78988988	drug_response	-0.00222	-0.0035	0.843	WWOX	intron_variant;intron_variant,NMD_transcript_variant
SANAD_LRR_univariate	chr16	78988988	drug_response	-0.00222	-0.0964	0.869	WWOX	intron_variant;intron_variant,NMD_transcript_variant
SANAD_LRR_univariate	chr16	78988988	drug_response	-0.00222	-0.0964	0.869	WWOX	intron_variant;intron_variant,NMD_transcript_variant
SANAD_LRR_Joint_model	chr16	78989935	drug_response	0.0176	0.00973	0.737	WWOX	intron_variant;intron_variant,NMD_transcript_variant
SANAD_LRR_Joint_model	chr16	78989935	drug_response	0.0176	0.00973	0.737	WWOX	intron_variant;intron_variant,NMD_transcript_variant
SANAD_LRR_univariate	chr16	78989935	drug_response	0.0176	0.335	0.365	WWOX	intron_variant;intron_variant,NMD_transcript_variant
SANAD_LRR_univariate	chr16	78989935	drug_response	0.0176	0.335	0.365	WWOX	intron_variant;intron_variant,NMD_transcript_variant
SANAD_LRR_Joint_model	chr16	78992542	drug_response	0.0028	0.00715	0.546	WWOX	intron_variant;intron_variant,NMD_transcript_variant
SANAD_LRR_Joint_model	chr16	78992542	drug_response	0.0028	0.00715	0.546	WWOX	intron_variant;intron_variant,NMD_transcript_variant
SANAD_LRR_univariate	chr16	78992542	drug_response	0.0028	0.668	0.496	WWOX	intron_variant;intron_variant,NMD_transcript_variant
SANAD_LRR_univariate	chr16	78992542	drug_response	0.0028	0.668	0.496	WWOX	intron_variant;intron_variant,NMD_transcript_variant
SANAD_LRR_Joint_model	chr16	78996850	drug_response	0.0243	-0.00283	0.865	WWOX	intron_variant;intron_variant,NMD_transcript_variant
SANAD_LRR_Joint_model	chr16	78996850	drug_response	0.0243	-0.00283	0.865	WWOX	intron_variant;intron_variant,NMD_transcript_variant
SANAD_LRR_univariate	chr16	78996850	drug_response	0.0243	0.156	0.803	WWOX	intron_variant;intron_variant,NMD_transcript_variant
SANAD_LRR_univariate	chr16	78996850	drug_response	0.0243	0.156	0.803	WWOX	intron_variant;intron_variant,NMD_transcript_variant
SANAD_LRR_Joint_model	chr16	78997613	drug_response	-0.00614	0.00345	0.76	WWOX	intron_variant;intron_variant,NMD_transcript_variant
SANAD_LRR_Joint_model	chr16	78997613	drug_response	-0.00614	0.00345	0.76	WWOX	intron_variant;intron_variant,NMD_transcript_variant
SANAD_LRR_univariate	chr16	78997613	drug_response	-0.00614	0.235	0.8	WWOX	intron_variant;intron_variant,NMD_transcript_variant
SANAD_LRR_univariate	chr16	78997613	drug_response	-0.00614	0.235	0.8	WWOX	intron_variant;intron_variant,NMD_transcript_variant
SANAD_LRR_Joint_model	chr16	78999644	drug_response	0.00133	-0.0144	0.357	WWOX	intron_variant;intron_variant,NMD_transcript_variant
SANAD_LRR_Joint_model	chr16	78999644	drug_response	0.00133	-0.0144	0.357	WWOX	intron_variant;intron_variant,NMD_transcript_variant
SANAD_LRR_univariate	chr16	78999644	drug_response	0.00133	-1.39	0.122	WWOX	intron_variant;intron_variant,NMD_transcript_variant
SANAD_LRR_univariate	chr16	78999644	drug_response	0.00133	-1.39	0.122	WWOX	intron_variant;intron_variant,NMD_transcript_variant
SANAD_Genotype_Joint_model	chr16	79001897	drug_response	0.000488	-0.0004	0.428	WWOX	intron_variant;intron_variant,NMD_transcript_variant
SANAD_Genotype_Univariate	chr16	79001897	drug_response	0.000488	-173	0.133	WWOX	intron_variant;intron_variant,NMD_transcript_variant
SANAD_LRR_Joint_model	chr16	79001897	drug_response	-0.0179	0.0132	0.429	WWOX	intron_variant;intron_variant,NMD_transcript_variant
SANAD_LRR_Joint_model	chr16	79001897	drug_response	-0.0179	0.0132	0.429	WWOX	intron_variant;intron_variant,NMD_transcript_variant
SANAD_LRR_univariate	chr16	79001897	drug_response	-0.0179	0.497	0.518	WWOX	intron_variant;intron_variant,NMD_transcript_variant
SANAD_LRR_univariate	chr16	79001897	drug_response	-0.0179	0.497	0.518	WWOX	intron_variant;intron_variant,NMD_transcript_variant
SANAD_Genotype_Joint_model	chr16	79004229	drug_response	0.000793	-0.000651	0.428	WWOX	intron_variant;intron_variant,NMD_transcript_variant
SANAD_Genotype_Univariate	chr16	79004229	drug_response	0.000793	-106	0.133	WWOX	intron_variant;intron_variant,NMD_transcript_variant
SANAD_LRR_Joint_model	chr16	79004229	drug_response	0.00221	0.00381	0.76	WWOX	intron_variant;intron_variant,NMD_transcript_variant
SANAD_LRR_univariate	chr16	79004229	drug_response	0.00221	-0.263	0.755	WWOX	intron_variant;intron_variant,NMD_transcript_variant
SANAD_Genotype_Joint_model	chr16	79005751	drug_response	0.000713	-0.000125	0.428	WWOX	intron_variant;intron_variant,NMD_transcript_variant
SANAD_Genotype_Univariate	chr16	79005751	drug_response	0.000713	-551	0.133	WWOX	intron_variant;intron_variant,NMD_transcript_variant
SANAD_LRR_Joint_model	chr16	79005751	drug_response	0.00822	-0.0135	0.468	WWOX	intron_variant;intron_variant,NMD_transcript_variant
SANAD_LRR_univariate	chr16	79005751	drug_response	0.00822	-0.303	0.649	WWOX	intron_variant;intron_variant,NMD_transcript_variant
SANAD_Genotype_Joint_model	chr16	79006636	drug_response	0.000773	0.000612	0.899	WWOX	intron_variant;intron_variant,NMD_transcript_variant
SANAD_Genotype_Univariate	chr16	79006636	drug_response	0.000773	-13.1	0.329	WWOX	intron_variant;intron_variant,NMD_transcript_variant
SANAD_LRR_Joint_model	chr16	79006636	drug_response	0.00338	-0.0059	0.714	WWOX	intron_variant;intron_variant,NMD_transcript_variant
SANAD_LRR_univariate	chr16	79006636	drug_response	0.00338	-0.0928	0.889	WWOX	intron_variant;intron_variant,NMD_transcript_variant
SANAD_LRR_Joint_model	chr16	79006863	drug_response	0.0117	-0.000885	0.952	WWOX	intron_variant;intron_variant,NMD_transcript_variant
SANAD_LRR_univariate	chr16	79006863	drug_response	0.0117	-0.126	0.855	WWOX	intron_variant;intron_variant,NMD_transcript_variant
SANAD_LRR_Joint_model	chr16	79008267	drug_response	-0.00899	0.000829	0.945	WWOX	intron_variant;intron_variant,NMD_transcript_variant
SANAD_LRR_univariate	chr16	79008267	drug_response	-0.00899	0.483	0.573	WWOX	intron_variant;intron_variant,NMD_transcript_variant
SANAD_LRR_Joint_model	chr16	79008781	drug_response	0.0093	0.00617	0.843	WWOX	intron_variant;intron_variant,NMD_transcript_variant
SANAD_LRR_univariate	chr16	79008781	drug_response	0.0093	-0.0614	0.852	WWOX	intron_variant;intron_variant,NMD_transcript_variant
SANAD_LRR_Joint_model	chr16	79009468	drug_response	0.00683	-0.00352	0.803	WWOX	intron_variant;intron_variant,NMD_transcript_variant
SANAD_LRR_univariate	chr16	79009468	drug_response	0.00683	0.139	0.85	WWOX	intron_variant;intron_variant,NMD_transcript_variant
SANAD_Genotype_Joint_model	chr16	79011173	drug_response	0.000846	-8.98e-05	0.481	WWOX;PIH1	downstream_gene_variant;intron_variant;intron_variant,NMD_transcript_variant
SANAD_Genotype_Univariate	chr16	79011173	drug_response	0.000846	-625	0.211	PIH1;WWOX	downstream_gene_variant;intron_variant;intron_variant,NMD_transcript_variant
SANAD_LRR_Joint_model	chr16	79011173	drug_response	0.0138	0.00722	0.605	WWOX;PIH1	intron_variant;downstream_gene_variant;intron_variant,NMD_transcript_variant
SANAD_LRR_univariate	chr16	79011173	drug_response	0.0138	1.03	0.203	WWOX;PIH1	intron_variant;downstream_gene_variant;intron_variant,NMD_transcript_variant
SANAD_Genotype_Joint_model	chr16	79011252	drug_response	0.00109	0.00461	0.419	WWOX;PIH1	downstream_gene_variant;intron_variant;intron_variant,NMD_transcript_variant
SANAD_Genotype_Univariate	chr16	79011252	drug_response	0.00109	15.3	0.141	PIH1;WWOX	downstream_gene_variant;intron_variant;intron_variant,NMD_transcript_variant
SANAD_LRR_Joint_model	chr16	79011252	drug_response	0.003	-0.0147	0.381	WWOX;PIH1	intron_variant;downstream_gene_variant;intron_variant,NMD_transcript_variant
SANAD_LRR_univariate	chr16	79011252	drug_response	0.003	-0.995	0.223	WWOX;PIH1	intron_variant;downstream_gene_variant;intron_variant,NMD_transcript_variant
SANAD_Genotype_Joint_model	chr16	79012824	drug_response	0.0044	0.000155	0.837	WWOX;PIH1	downstream_gene_variant;intron_variant;intron_variant,NMD_transcript_variant
SANAD_Genotype_Univariate	chr16	79012824	drug_response	0.0044	0.899	0.951	PIH1;WWOX	downstream_gene_variant;intron_variant;intron_variant,NMD_transcript_variant
SANAD_LRR_Joint_model	chr16	79012824	drug_response	0.0115	-0.0149	0.468	WWOX;PIH1	intron_variant;downstream_gene_variant;intron_variant,NMD_transcript_variant
SANAD_LRR_univariate	chr16	79012824	drug_response	0.0115	-0.813	0.175	WWOX;PIH1	intron_variant;downstream_gene_variant;intron_variant,NMD_transcript_variant
SANAD_Genotype_Joint_model	chr16	79013587	drug_response	0.00522	0.00137	0.566	WWOX;PIH1	downstream_gene_variant;intron_variant;intron_variant,NMD_transcript_variant
SANAD_Genotype_Univariate	chr16	79013587	drug_response	0.00522	6.56	0.461	PIH1;WWOX	downstream_gene_variant;intron_variant;intron_variant,NMD_transcript_variant
SANAD_LRR_Joint_model	chr16	79013587	drug_response	4.91e-05	-0.00439	0.843	WWOX;PIH1	intron_variant;downstream_gene_variant;intron_variant,NMD_transcript_variant
SANAD_LRR_univariate	chr16	79013587	drug_response	4.91e-05	-0.265	0.571	WWOX;PIH1	intron_variant;downstream_gene_variant;intron_variant,NMD_transcript_variant
SANAD_LRR_Joint_model	chr16	79016408	drug_response	-0.00174	-0.00147	0.884	WWOX;PIH1	intron_variant;intron_variant,NMD_transcript_variant;upstream_gene_variant
SANAD_LRR_univariate	chr16	79016408	drug_response	-0.00174	-0.438	0.667	WWOX;PIH1	intron_variant;upstream_gene_variant;intron_variant,NMD_transcript_variant
SANAD_LRR_Joint_model	chr16	79018166	drug_response	-0.0121	0.0112	0.488	WWOX;PIH1	intron_variant;intron_variant,NMD_transcript_variant;upstream_gene_variant
SANAD_LRR_univariate	chr16	79018166	drug_response	-0.0121	0.723	0.34	WWOX;PIH1	intron_variant;upstream_gene_variant;intron_variant,NMD_transcript_variant
SANAD_LRR_Joint_model	chr16	79019253	drug_response	0.0259	-0.00604	0.688	WWOX;PIH1	intron_variant;intron_variant,NMD_transcript_variant;upstream_gene_variant
SANAD_LRR_univariate	chr16	79019253	drug_response	0.0259	-0.494	0.49	WWOX;PIH1	intron_variant;upstream_gene_variant;intron_variant,NMD_transcript_variant
SANAD_Genotype_Joint_model	chr16	79025595	drug_response	0.00066	-4.78e-05	0.725	WWOX;RP11-319G9.5	upstream_gene_variant;intron_variant;intron_variant,NMD_transcript_variant
SANAD_Genotype_Univariate	chr16	79025595	drug_response	0.00066	488	0.312	RP11-319G9.5;WWOX	upstream_gene_variant;intron_variant;intron_variant,NMD_transcript_variant
SANAD_LRR_Joint_model	chr16	79025595	drug_response	0.00101	0.00511	0.704	WWOX;RP11-319G9.5	intron_variant;intron_variant,NMD_transcript_variant;upstream_gene_variant
SANAD_LRR_univariate	chr16	79025595	drug_response	0.00101	0.263	0.741	WWOX;RP11-319G9.5	intron_variant;upstream_gene_variant;intron_variant,NMD_transcript_variant
SANAD_LRR_Joint_model	chr16	79027129	drug_response	-0.00881	0.00582	0.68	WWOX;RP11-319G9.5	intron_variant;intron_variant,NMD_transcript_variant;upstream_gene_variant
SANAD_LRR_univariate	chr16	79027129	drug_response	-0.00881	0.19	0.805	WWOX;RP11-319G9.5	intron_variant;upstream_gene_variant;intron_variant,NMD_transcript_variant
SANAD_Genotype_Joint_model	chr16	79029107	drug_response	0.00175	-4.48e-05	0.508	WWOX;RP11-319G9.5	intron_variant,non_coding_transcript_variant;intron_variant;intron_variant,NMD_transcript_variant
SANAD_Genotype_Univariate	chr16	79029107	drug_response	0.00175	-1130	0.25	RP11-319G9.5;WWOX	intron_variant,non_coding_transcript_variant;intron_variant;intron_variant,NMD_transcript_variant
SANAD_LRR_Joint_model	chr16	79029107	drug_response	0.00727	-0.00249	0.804	WWOX;RP11-319G9.5	intron_variant;intron_variant,non_coding_transcript_variant;intron_variant,NMD_transcript_variant
SANAD_LRR_univariate	chr16	79029107	drug_response	0.00727	-0.609	0.556	WWOX;RP11-319G9.5	intron_variant;intron_variant,NMD_transcript_variant;intron_variant,non_coding_transcript_variant
SANAD_LRR_Joint_model	chr16	79032782	drug_response	0.0132	-0.0112	0.6	WWOX;RP11-319G9.5	intron_variant;intron_variant,non_coding_transcript_variant;intron_variant,NMD_transcript_variant
SANAD_LRR_univariate	chr16	79032782	drug_response	0.0132	-0.174	0.741	WWOX;RP11-319G9.5	intron_variant;intron_variant,NMD_transcript_variant;intron_variant,non_coding_transcript_variant
SANAD_LRR_Joint_model	chr16	79033422	drug_response	-0.00326	-0.00343	0.788	WWOX;RP11-319G9.5	intron_variant;intron_variant,non_coding_transcript_variant;intron_variant,NMD_transcript_variant
SANAD_LRR_univariate	chr16	79033422	drug_response	-0.00326	-0.244	0.768	WWOX;RP11-319G9.5	intron_variant;intron_variant,NMD_transcript_variant;intron_variant,non_coding_transcript_variant
SANAD_LRR_Joint_model	chr16	79036736	drug_response	0.00603	-0.0129	0.473	WWOX;RP11-319G9.5	intron_variant;intron_variant,non_coding_transcript_variant;intron_variant,NMD_transcript_variant
SANAD_LRR_univariate	chr16	79036736	drug_response	0.00603	-0.081	0.906	WWOX;RP11-319G9.5	intron_variant;intron_variant,NMD_transcript_variant;intron_variant,non_coding_transcript_variant
SANAD_LRR_Joint_model	chr16	79037322	drug_response	-0.0165	0.00382	0.817	WWOX;RP11-319G9.5	intron_variant;intron_variant,non_coding_transcript_variant;intron_variant,NMD_transcript_variant
SANAD_LRR_univariate	chr16	79037322	drug_response	-0.0165	0.609	0.332	WWOX;RP11-319G9.5	intron_variant;intron_variant,NMD_transcript_variant;intron_variant,non_coding_transcript_variant
SANAD_LRR_Joint_model	chr16	79037784	drug_response	-0.00164	-0.042	0.362	WWOX;RP11-319G9.5	intron_variant;intron_variant,non_coding_transcript_variant;intron_variant,NMD_transcript_variant
SANAD_LRR_univariate	chr16	79037784	drug_response	-0.00164	-0.976	0.224	WWOX;RP11-319G9.5	intron_variant;intron_variant,NMD_transcript_variant;intron_variant,non_coding_transcript_variant
SANAD_Genotype_Joint_model	chr16	79038031	drug_response	0.00159	-4.76e-05	0.433	WWOX;RP11-319G9.5	intron_variant,non_coding_transcript_variant;intron_variant;intron_variant,NMD_transcript_variant
SANAD_Genotype_Univariate	chr16	79038031	drug_response	0.00159	-1410	0.165	RP11-319G9.5;WWOX	intron_variant,non_coding_transcript_variant;intron_variant;intron_variant,NMD_transcript_variant
SANAD_LRR_Joint_model	chr16	79038031	drug_response	0.0174	0.000284	0.98	WWOX;RP11-319G9.5	intron_variant;intron_variant,non_coding_transcript_variant;intron_variant,NMD_transcript_variant
SANAD_LRR_univariate	chr16	79038031	drug_response	0.0174	0.186	0.833	WWOX;RP11-319G9.5	intron_variant;intron_variant,NMD_transcript_variant;intron_variant,non_coding_transcript_variant
SANAD_LRR_Joint_model	chr16	79039600	drug_response	0.0126	-0.00287	0.813	WWOX;RP11-319G9.5	intron_variant;downstream_gene_variant;intron_variant,NMD_transcript_variant
SANAD_LRR_univariate	chr16	79039600	drug_response	0.0126	-0.366	0.67	WWOX;RP11-319G9.5	intron_variant;downstream_gene_variant;intron_variant,NMD_transcript_variant
SANAD_Genotype_Joint_model	chr16	79041567	drug_response	0.00088	-0.000623	0.396	WWOX;RP11-319G9.5	downstream_gene_variant;intron_variant;intron_variant,NMD_transcript_variant
SANAD_Genotype_Univariate	chr16	79041567	drug_response	0.00088	-125	0.112	RP11-319G9.5;WWOX	downstream_gene_variant;intron_variant;intron_variant,NMD_transcript_variant
SANAD_LRR_Joint_model	chr16	79041567	drug_response	-0.00235	-0.00315	0.781	WWOX;RP11-319G9.5	intron_variant;downstream_gene_variant;intron_variant,NMD_transcript_variant
SANAD_LRR_univariate	chr16	79041567	drug_response	-0.00235	-0.238	0.798	WWOX;RP11-319G9.5	intron_variant;downstream_gene_variant;intron_variant,NMD_transcript_variant
SANAD_LRR_Joint_model	chr16	79043240	drug_response	-0.0235	0.0124	0.496	WWOX;RP11-319G9.5	intron_variant;downstream_gene_variant;intron_variant,NMD_transcript_variant
SANAD_LRR_univariate	chr16	79043240	drug_response	-0.0235	0.302	0.65	WWOX;RP11-319G9.5	intron_variant;downstream_gene_variant;intron_variant,NMD_transcript_variant
SANAD_Genotype_Joint_model	chr16	79043251	drug_response	0.000865	-0.000159	0.51	WWOX;RP11-319G9.5	downstream_gene_variant;intron_variant;intron_variant,NMD_transcript_variant
SANAD_Genotype_Univariate	chr16	79043251	drug_response	0.000865	-51	0.292	RP11-319G9.5;WWOX	downstream_gene_variant;intron_variant;intron_variant,NMD_transcript_variant
SANAD_LRR_Joint_model	chr16	79043251	drug_response	0.0171	0.00246	0.873	WWOX;RP11-319G9.5	intron_variant;downstream_gene_variant;intron_variant,NMD_transcript_variant
SANAD_LRR_univariate	chr16	79043251	drug_response	0.0171	0.00861	0.99	WWOX;RP11-319G9.5	intron_variant;downstream_gene_variant;intron_variant,NMD_transcript_variant
SANAD_LRR_Joint_model	chr16	79044649	drug_response	0.0118	-0.00175	0.888	WWOX	intron_variant;intron_variant,NMD_transcript_variant
SANAD_LRR_univariate	chr16	79044649	drug_response	0.0118	0.0915	0.912	WWOX	intron_variant;intron_variant,NMD_transcript_variant
SANAD_Genotype_Joint_model	chr16	79049341	drug_response	0.00054	-0.00287	0.396	WWOX	intron_variant;intron_variant,NMD_transcript_variant
SANAD_Genotype_Univariate	chr16	79049341	drug_response	0.00054	-27.2	0.112	WWOX	intron_variant;intron_variant,NMD_transcript_variant
SANAD_LRR_Joint_model	chr16	79049341	drug_response	-0.00596	-0.0219	0.294	WWOX	intron_variant;intron_variant,NMD_transcript_variant
SANAD_LRR_univariate	chr16	79049341	drug_response	-0.00596	-0.974	0.191	WWOX	intron_variant;intron_variant,NMD_transcript_variant
SANAD_Genotype_Joint_model	chr16	79050116	drug_response	0.000403	-0.000785	0.396	WWOX	intron_variant;intron_variant,NMD_transcript_variant
SANAD_Genotype_Univariate	chr16	79050116	drug_response	0.000403	-99.4	0.112	WWOX	intron_variant;intron_variant,NMD_transcript_variant
SANAD_LRR_Joint_model	chr16	79050116	drug_response	0.00135	-7.48e-05	0.995	WWOX	intron_variant;intron_variant,NMD_transcript_variant
SANAD_LRR_univariate	chr16	79050116	drug_response	0.00135	0.156	0.864	WWOX	intron_variant;intron_variant,NMD_transcript_variant
SANAD_Genotype_Joint_model	chr16	79053610	drug_response	0.000489	-0.0021	0.396	WWOX	intron_variant;intron_variant,NMD_transcript_variant
SANAD_Genotype_Univariate	chr16	79053610	drug_response	0.000489	-37.1	0.112	WWOX	intron_variant;intron_variant,NMD_transcript_variant
SANAD_LRR_Joint_model	chr16	79053610	drug_response	-0.000692	0.0168	0.349	WWOX	intron_variant;intron_variant,NMD_transcript_variant
SANAD_LRR_univariate	chr16	79053610	drug_response	-0.000692	1.16	0.146	WWOX	intron_variant;intron_variant,NMD_transcript_variant
SANAD_Genotype_Joint_model	chr16	79053912	drug_response	0.000418	-0.00102	0.396	WWOX	intron_variant;intron_variant,NMD_transcript_variant
SANAD_Genotype_Univariate	chr16	79053912	drug_response	0.000418	-76.8	0.112	WWOX	intron_variant;intron_variant,NMD_transcript_variant
SANAD_LRR_Joint_model	chr16	79053912	drug_response	-0.00122	-0.00315	0.76	WWOX	intron_variant;intron_variant,NMD_transcript_variant
SANAD_LRR_univariate	chr16	79053912	drug_response	-0.00122	-0.19	0.852	WWOX	intron_variant;intron_variant,NMD_transcript_variant
SANAD_Genotype_Joint_model	chr16	79054020	drug_response	0.000565	-0.00325	0.396	WWOX	intron_variant;intron_variant,NMD_transcript_variant
SANAD_Genotype_Univariate	chr16	79054020	drug_response	0.000565	-24	0.112	WWOX	intron_variant;intron_variant,NMD_transcript_variant
SANAD_LRR_Joint_model	chr16	79054020	drug_response	-0.0148	0.00114	0.93	WWOX	intron_variant;intron_variant,NMD_transcript_variant
SANAD_LRR_univariate	chr16	79054020	drug_response	-0.0148	-0.216	0.784	WWOX	intron_variant;intron_variant,NMD_transcript_variant
SANAD_Genotype_Joint_model	chr16	79056756	drug_response	0.00109	-0.0042	0.385	WWOX	intron_variant;intron_variant,NMD_transcript_variant
SANAD_Genotype_Univariate	chr16	79056756	drug_response	0.00109	-7.34	0.12	WWOX	intron_variant;intron_variant,NMD_transcript_variant
SANAD_LRR_Joint_model	chr16	79056756	drug_response	0.00978	-0.0303	0.315	WWOX	intron_variant;intron_variant,NMD_transcript_variant
SANAD_LRR_univariate	chr16	79056756	drug_response	0.00978	-0.841	0.0889	WWOX	intron_variant;intron_variant,NMD_transcript_variant
SANAD_Genotype_Joint_model	chr16	79057144	drug_response	0.000449	-0.00116	0.396	WWOX	intron_variant;intron_variant,NMD_transcript_variant
SANAD_Genotype_Univariate	chr16	79057144	drug_response	0.000449	-67.5	0.112	WWOX	intron_variant;intron_variant,NMD_transcript_variant
SANAD_LRR_Joint_model	chr16	79057144	drug_response	-0.0102	-0.0144	0.376	WWOX	intron_variant;intron_variant,NMD_transcript_variant
SANAD_LRR_univariate	chr16	79057144	drug_response	-0.0102	-1.09	0.193	WWOX	intron_variant;intron_variant,NMD_transcript_variant
SANAD_Genotype_Joint_model	chr16	79060227	drug_response	0.000393	-0.000554	0.396	WWOX	intron_variant;intron_variant,NMD_transcript_variant
SANAD_Genotype_Univariate	chr16	79060227	drug_response	0.000393	-141	0.112	WWOX	intron_variant;intron_variant,NMD_transcript_variant
SANAD_LRR_Joint_model	chr16	79060227	drug_response	0.00627	0.00471	0.679	WWOX	intron_variant;intron_variant,NMD_transcript_variant
SANAD_LRR_univariate	chr16	79060227	drug_response	0.00627	0.487	0.605	WWOX	intron_variant;intron_variant,NMD_transcript_variant
SANAD_Genotype_Joint_model	chr16	79061243	drug_response	0.00461	-0.00485	0.364	WWOX	intron_variant;intron_variant,NMD_transcript_variant
SANAD_Genotype_Univariate	chr16	79061243	drug_response	0.00461	-8.59	0.0647	WWOX	intron_variant;intron_variant,NMD_transcript_variant
SANAD_LRR_Joint_model	chr16	79061243	drug_response	0.0196	-0.00079	0.963	WWOX	intron_variant;intron_variant,NMD_transcript_variant
SANAD_LRR_univariate	chr16	79061243	drug_response	0.0196	0.158	0.796	WWOX	intron_variant;intron_variant,NMD_transcript_variant
SANAD_Genotype_Joint_model	chr16	79062754	drug_response	0.00519	-0.0012	0.898	WWOX	intron_variant;intron_variant,NMD_transcript_variant
SANAD_Genotype_Univariate	chr16	79062754	drug_response	0.00519	-0.367	0.733	WWOX	intron_variant;intron_variant,NMD_transcript_variant
SANAD_LRR_Joint_model	chr16	79062754	drug_response	-0.0126	-0.00107	0.954	WWOX	intron_variant;intron_variant,NMD_transcript_variant
SANAD_LRR_univariate	chr16	79062754	drug_response	-0.0126	-0.116	0.832	WWOX	intron_variant;intron_variant,NMD_transcript_variant
SANAD_Genotype_Joint_model	chr16	79062859	drug_response	0.00462	-0.0045	0.664	WWOX	intron_variant;intron_variant,NMD_transcript_variant
SANAD_Genotype_Univariate	chr16	79062859	drug_response	0.00462	-0.94	0.356	WWOX	intron_variant;intron_variant,NMD_transcript_variant
SANAD_LRR_Joint_model	chr16	79062859	drug_response	-0.0332	0.0107	0.603	WWOX	intron_variant;intron_variant,NMD_transcript_variant
SANAD_LRR_univariate	chr16	79062859	drug_response	-0.0332	0.109	0.84	WWOX	intron_variant;intron_variant,NMD_transcript_variant
SANAD_Genotype_Joint_model	chr16	79063803	drug_response	0.00566	-0.00571	0.605	WWOX	intron_variant;intron_variant,NMD_transcript_variant
SANAD_Genotype_Univariate	chr16	79063803	drug_response	0.00566	-0.988	0.314	WWOX	intron_variant;intron_variant,NMD_transcript_variant
SANAD_LRR_Joint_model	chr16	79063803	drug_response	-0.029	-0.0435	0.25	WWOX	intron_variant;intron_variant,NMD_transcript_variant
SANAD_LRR_univariate	chr16	79063803	drug_response	-0.029	-1.1	0.014	WWOX	intron_variant;intron_variant,NMD_transcript_variant
SANAD_Genotype_Joint_model	chr16	79068806	drug_response	0.00591	-0.00349	0.722	WWOX	intron_variant;intron_variant,NMD_transcript_variant
SANAD_Genotype_Univariate	chr16	79068806	drug_response	0.00591	-0.839	0.424	WWOX	intron_variant;intron_variant,NMD_transcript_variant
SANAD_LRR_Joint_model	chr16	79068806	drug_response	-0.0171	-0.0186	0.475	WWOX	intron_variant;intron_variant,NMD_transcript_variant
SANAD_LRR_univariate	chr16	79068806	drug_response	-0.0171	-0.266	0.571	WWOX	intron_variant;intron_variant,NMD_transcript_variant
SANAD_Genotype_Joint_model	chr16	79069361	drug_response	0.00064	0.00192	0.445	WWOX	intron_variant;intron_variant,NMD_transcript_variant
SANAD_Genotype_Univariate	chr16	79069361	drug_response	0.00064	32.4	0.165	WWOX	intron_variant;intron_variant,NMD_transcript_variant
SANAD_LRR_Joint_model	chr16	79069361	drug_response	0.0117	-0.00216	0.862	WWOX	intron_variant;intron_variant,NMD_transcript_variant
SANAD_LRR_univariate	chr16	79069361	drug_response	0.0117	-0.198	0.81	WWOX	intron_variant;intron_variant,NMD_transcript_variant
SANAD_Genotype_Joint_model	chr16	79073065	drug_response	0.000784	0.001	0.445	WWOX	intron_variant;intron_variant,NMD_transcript_variant
SANAD_Genotype_Univariate	chr16	79073065	drug_response	0.000784	62	0.165	WWOX	intron_variant;intron_variant,NMD_transcript_variant
SANAD_LRR_Joint_model	chr16	79073065	drug_response	-0.00979	-0.00499	0.652	WWOX	intron_variant;intron_variant,NMD_transcript_variant
SANAD_LRR_univariate	chr16	79073065	drug_response	-0.00979	-0.257	0.795	WWOX	intron_variant;intron_variant,NMD_transcript_variant
SANAD_Genotype_Joint_model	chr16	79074502	drug_response	0.000806	-0.00362	0.531	WWOX	intron_variant;intron_variant,NMD_transcript_variant
SANAD_Genotype_Univariate	chr16	79074502	drug_response	0.000806	-1.86	0.371	WWOX	intron_variant;intron_variant,NMD_transcript_variant
SANAD_LRR_Joint_model	chr16	79074502	drug_response	-0.00186	-0.00547	0.859	WWOX	intron_variant;intron_variant,NMD_transcript_variant
SANAD_LRR_univariate	chr16	79074502	drug_response	-0.00186	-0.0288	0.931	WWOX	intron_variant;intron_variant,NMD_transcript_variant
SANAD_Genotype_Joint_model	chr16	79075311	drug_response	0.000503	9.55e-05	0.935	WWOX	intron_variant;intron_variant,NMD_transcript_variant
SANAD_Genotype_Univariate	chr16	79075311	drug_response	0.000503	1.27	0.881	WWOX	intron_variant;intron_variant,NMD_transcript_variant
SANAD_LRR_Joint_model	chr16	79075311	drug_response	0.000706	-0.0126	0.651	WWOX	intron_variant;intron_variant,NMD_transcript_variant
SANAD_LRR_univariate	chr16	79075311	drug_response	0.000706	-0.351	0.37	WWOX	intron_variant;intron_variant,NMD_transcript_variant
SANAD_Genotype_Joint_model	chr16	79075425	drug_response	0.000887	0.00185	0.537	WWOX	intron_variant;intron_variant,NMD_transcript_variant
SANAD_Genotype_Univariate	chr16	79075425	drug_response	0.000887	4.1	0.328	WWOX	intron_variant;intron_variant,NMD_transcript_variant
SANAD_LRR_Joint_model	chr16	79075425	drug_response	0.00232	-0.00882	0.545	WWOX	intron_variant;intron_variant,NMD_transcript_variant
SANAD_LRR_univariate	chr16	79075425	drug_response	0.00232	-0.829	0.301	WWOX	intron_variant;intron_variant,NMD_transcript_variant
SANAD_Genotype_Joint_model	chr16	79076482	drug_response	0.000758	-0.00442	0.46	WWOX	intron_variant;intron_variant,NMD_transcript_variant
SANAD_Genotype_Univariate	chr16	79076482	drug_response	0.000758	-2.87	0.244	WWOX	intron_variant;intron_variant,NMD_transcript_variant
SANAD_LRR_Joint_model	chr16	79076482	drug_response	-0.00466	-0.0154	0.375	WWOX	intron_variant;intron_variant,NMD_transcript_variant
SANAD_LRR_univariate	chr16	79076482	drug_response	-0.00466	-1.13	0.15	WWOX	intron_variant;intron_variant,NMD_transcript_variant
SANAD_Genotype_Joint_model	chr16	79077158	drug_response	0.00229	-0.00171	0.679	WWOX	intron_variant;intron_variant,NMD_transcript_variant
SANAD_Genotype_Univariate	chr16	79077158	drug_response	0.00229	-2.14	0.416	WWOX	intron_variant;intron_variant,NMD_transcript_variant
SANAD_LRR_Joint_model	chr16	79077158	drug_response	0.00566	-0.00424	0.904	WWOX	intron_variant;intron_variant,NMD_transcript_variant
SANAD_LRR_univariate	chr16	79077158	drug_response	0.00566	0.0132	0.964	WWOX	intron_variant;intron_variant,NMD_transcript_variant
SANAD_Genotype_Joint_model	chr16	79078175	drug_response	0.00158	-0.0012	0.52	WWOX	intron_variant;intron_variant,NMD_transcript_variant
SANAD_Genotype_Univariate	chr16	79078175	drug_response	0.00158	-8.9	0.295	WWOX	intron_variant;intron_variant,NMD_transcript_variant
SANAD_LRR_Joint_model	chr16	79078175	drug_response	0.000561	0.0239	0.254	WWOX	intron_variant;intron_variant,NMD_transcript_variant
SANAD_LRR_univariate	chr16	79078175	drug_response	0.000561	2.01	0.0129	WWOX	intron_variant;intron_variant,NMD_transcript_variant
SANAD_Genotype_Joint_model	chr16	79079659	drug_response	0.00312	-0.00677	0.393	WWOX	intron_variant;intron_variant,NMD_transcript_variant
SANAD_Genotype_Univariate	chr16	79079659	drug_response	0.00312	-6	0.0895	WWOX	intron_variant;intron_variant,NMD_transcript_variant
SANAD_LRR_Joint_model	chr16	79079659	drug_response	0.0186	-0.00707	0.724	WWOX	intron_variant;intron_variant,NMD_transcript_variant
SANAD_LRR_univariate	chr16	79079659	drug_response	0.0186	-0.442	0.405	WWOX	intron_variant;intron_variant,NMD_transcript_variant
SANAD_Genotype_Joint_model	chr16	79081111	drug_response	0.0028	-0.00159	0.805	WWOX	intron_variant;intron_variant,NMD_transcript_variant
SANAD_Genotype_Univariate	chr16	79081111	drug_response	0.0028	-0.542	0.731	WWOX	intron_variant;intron_variant,NMD_transcript_variant
SANAD_LRR_Joint_model	chr16	79081111	drug_response	0.00469	-0.0049	0.713	WWOX	intron_variant;intron_variant,NMD_transcript_variant
SANAD_LRR_univariate	chr16	79081111	drug_response	0.00469	-0.923	0.248	WWOX	intron_variant;intron_variant,NMD_transcript_variant
SANAD_Genotype_Joint_model	chr16	79085489	drug_response	0.000596	0.00102	0.772	WWOX	intron_variant;intron_variant,NMD_transcript_variant
SANAD_Genotype_Univariate	chr16	79085489	drug_response	0.000596	0.427	0.885	WWOX	intron_variant;intron_variant,NMD_transcript_variant
SANAD_LRR_Joint_model	chr16	79085489	drug_response	0.00935	0.00692	0.606	WWOX	intron_variant;intron_variant,NMD_transcript_variant
SANAD_LRR_univariate	chr16	79085489	drug_response	0.00935	0.105	0.899	WWOX	intron_variant;intron_variant,NMD_transcript_variant
SANAD_Genotype_Joint_model	chr16	79086769	drug_response	0.00182	0.00124	0.701	WWOX	intron_variant;intron_variant,NMD_transcript_variant
SANAD_Genotype_Univariate	chr16	79086769	drug_response	0.00182	0.831	0.802	WWOX	intron_variant;intron_variant,NMD_transcript_variant
SANAD_LRR_Joint_model	chr16	79086769	drug_response	0.000585	-0.0129	0.407	WWOX	intron_variant;intron_variant,NMD_transcript_variant
SANAD_LRR_univariate	chr16	79086769	drug_response	0.000585	-0.644	0.445	WWOX	intron_variant;intron_variant,NMD_transcript_variant
SANAD_Genotype_Joint_model	chr16	79091158	drug_response	0.000879	-0.00282	0.458	WWOX	intron_variant;intron_variant,NMD_transcript_variant
SANAD_Genotype_Univariate	chr16	79091158	drug_response	0.000879	-5.69	0.191	WWOX	intron_variant;intron_variant,NMD_transcript_variant
SANAD_LRR_Joint_model	chr16	79091158	drug_response	-0.0015	-0.0104	0.447	WWOX	intron_variant;intron_variant,NMD_transcript_variant
SANAD_LRR_univariate	chr16	79091158	drug_response	-0.0015	-0.899	0.327	WWOX	intron_variant;intron_variant,NMD_transcript_variant
SANAD_LRR_Joint_model	chr16	79091767	drug_response	0.00331	0.00276	0.836	WWOX	intron_variant;intron_variant,NMD_transcript_variant
SANAD_LRR_univariate	chr16	79091767	drug_response	0.00331	0.405	0.65	WWOX	intron_variant;intron_variant,NMD_transcript_variant
SANAD_Genotype_Joint_model	chr16	79092448	drug_response	0.00183	0.000531	0.927	WWOX	intron_variant;intron_variant,NMD_transcript_variant
SANAD_Genotype_Univariate	chr16	79092448	drug_response	0.00183	-0.19	0.911	WWOX	intron_variant;intron_variant,NMD_transcript_variant
SANAD_LRR_Joint_model	chr16	79092448	drug_response	-0.00742	0.0194	0.388	WWOX	intron_variant;intron_variant,NMD_transcript_variant
SANAD_LRR_univariate	chr16	79092448	drug_response	-0.00742	0.323	0.588	WWOX	intron_variant;intron_variant,NMD_transcript_variant
SANAD_Genotype_Joint_model	chr16	79092703	drug_response	0.00209	-0.00112	0.861	WWOX	intron_variant;intron_variant,NMD_transcript_variant
SANAD_Genotype_Univariate	chr16	79092703	drug_response	0.00209	-0.762	0.62	WWOX	intron_variant;intron_variant,NMD_transcript_variant
SANAD_LRR_Joint_model	chr16	79092703	drug_response	-0.0628	0.00933	0.784	WWOX	intron_variant;intron_variant,NMD_transcript_variant
SANAD_LRR_univariate	chr16	79092703	drug_response	-0.0628	0.045	0.883	WWOX	intron_variant;intron_variant,NMD_transcript_variant
SANAD_Genotype_Joint_model	chr16	79095848	drug_response	0.000543	0.000212	0.872	WWOX	intron_variant;intron_variant,NMD_transcript_variant
SANAD_Genotype_Univariate	chr16	79095848	drug_response	0.000543	6.56	0.48	WWOX	intron_variant;intron_variant,NMD_transcript_variant
SANAD_LRR_Joint_model	chr16	79095848	drug_response	0.00396	0.00453	0.663	WWOX	intron_variant;intron_variant,NMD_transcript_variant
SANAD_LRR_univariate	chr16	79095848	drug_response	0.00396	0.218	0.836	WWOX	intron_variant;intron_variant,NMD_transcript_variant
SANAD_Genotype_Joint_model	chr16	79098219	drug_response	0.00105	-0.000262	0.819	WWOX	intron_variant;intron_variant,NMD_transcript_variant
SANAD_Genotype_Univariate	chr16	79098219	drug_response	0.00105	9.24	0.487	WWOX	intron_variant;intron_variant,NMD_transcript_variant
SANAD_LRR_Joint_model	chr16	79098219	drug_response	-0.00899	-0.000782	0.945	WWOX	intron_variant;intron_variant,NMD_transcript_variant
SANAD_LRR_univariate	chr16	79098219	drug_response	-0.00899	-0.219	0.806	WWOX	intron_variant;intron_variant,NMD_transcript_variant
SANAD_Genotype_Joint_model	chr16	79100054	drug_response	0.00125	-0.00554	0.405	WWOX	intron_variant;intron_variant,NMD_transcript_variant
SANAD_Genotype_Univariate	chr16	79100054	drug_response	0.00125	-1.93	0.362	WWOX	intron_variant;intron_variant,NMD_transcript_variant
SANAD_LRR_Joint_model	chr16	79100054	drug_response	0.00858	0.0124	0.442	WWOX	intron_variant;intron_variant,NMD_transcript_variant
SANAD_LRR_univariate	chr16	79100054	drug_response	0.00858	0.513	0.512	WWOX	intron_variant;intron_variant,NMD_transcript_variant
SANAD_Genotype_Joint_model	chr16	79104622	drug_response	0.000435	-6.38e-05	0.875	WWOX	intron_variant;intron_variant,NMD_transcript_variant
SANAD_Genotype_Univariate	chr16	79104622	drug_response	0.000435	24.9	0.441	WWOX	intron_variant;intron_variant,NMD_transcript_variant
SANAD_LRR_Joint_model	chr16	79104622	drug_response	0.0112	-0.0199	0.383	WWOX	intron_variant;intron_variant,NMD_transcript_variant
SANAD_LRR_univariate	chr16	79104622	drug_response	0.0112	-0.714	0.225	WWOX	intron_variant;intron_variant,NMD_transcript_variant
SANAD_Genotype_Joint_model	chr16	79107499	drug_response	0.000837	-0.000405	0.429	WWOX;RP11-556H2.4	downstream_gene_variant;intron_variant;intron_variant,NMD_transcript_variant
SANAD_Genotype_Univariate	chr16	79107499	drug_response	0.000837	-167	0.173	RP11-556H2.4;WWOX	downstream_gene_variant;intron_variant;intron_variant,NMD_transcript_variant
SANAD_LRR_Joint_model	chr16	79107499	drug_response	-0.00366	-0.00837	0.658	RP11-556H2.4;WWOX	intron_variant;downstream_gene_variant;intron_variant,NMD_transcript_variant
SANAD_LRR_univariate	chr16	79107499	drug_response	-0.00366	-0.592	0.304	WWOX;RP11-556H2.4	intron_variant;downstream_gene_variant;intron_variant,NMD_transcript_variant
SANAD_Genotype_Joint_model	chr16	79109753	drug_response	0.000683	-0.000432	0.401	WWOX;RP11-556H2.4	downstream_gene_variant;intron_variant;intron_variant,NMD_transcript_variant
SANAD_Genotype_Univariate	chr16	79109753	drug_response	0.000683	-42.3	0.204	RP11-556H2.4;WWOX	downstream_gene_variant;intron_variant;intron_variant,NMD_transcript_variant
SANAD_LRR_Joint_model	chr16	79109753	drug_response	-0.0252	0.0108	0.588	RP11-556H2.4;WWOX	intron_variant;downstream_gene_variant;intron_variant,NMD_transcript_variant
SANAD_LRR_univariate	chr16	79109753	drug_response	-0.0252	0.463	0.412	WWOX;RP11-556H2.4	intron_variant;downstream_gene_variant;intron_variant,NMD_transcript_variant
SANAD_Genotype_Joint_model	chr16	79111834	drug_response	0.000891	0.000642	0.882	WWOX;RP11-556H2.4	non_coding_transcript_exon_variant;intron_variant;intron_variant,NMD_transcript_variant
SANAD_Genotype_Univariate	chr16	79111834	drug_response	0.000891	5.99	0.197	RP11-556H2.4;WWOX	intron_variant;non_coding_transcript_exon_variant;intron_variant,NMD_transcript_variant
SANAD_LRR_Joint_model	chr16	79111834	drug_response	-0.00795	0.00543	0.73	RP11-556H2.4;WWOX	non_coding_transcript_exon_variant;intron_variant;intron_variant,NMD_transcript_variant
SANAD_LRR_univariate	chr16	79111834	drug_response	-0.00795	0.933	0.169	WWOX;RP11-556H2.4	intron_variant;non_coding_transcript_exon_variant;intron_variant,NMD_transcript_variant
SANAD_Genotype_Joint_model	chr16	79112197	drug_response	0.000376	5.71e-06	0.986	WWOX;RP11-556H2.4	upstream_gene_variant;intron_variant;intron_variant,NMD_transcript_variant
SANAD_Genotype_Univariate	chr16	79112197	drug_response	0.000376	-187	0.329	RP11-556H2.4;WWOX	upstream_gene_variant;intron_variant;intron_variant,NMD_transcript_variant
SANAD_LRR_Joint_model	chr16	79112197	drug_response	0.00368	0.000246	0.983	RP11-556H2.4;WWOX	intron_variant;intron_variant,NMD_transcript_variant;upstream_gene_variant
SANAD_LRR_univariate	chr16	79112197	drug_response	0.00368	-0.339	0.708	WWOX;RP11-556H2.4	intron_variant;upstream_gene_variant;intron_variant,NMD_transcript_variant
SANAD_LRR_Joint_model	chr16	79112667	drug_response	0.00801	-0.0127	0.403	RP11-556H2.4;WWOX	intron_variant;intron_variant,NMD_transcript_variant;upstream_gene_variant
SANAD_LRR_univariate	chr16	79112667	drug_response	0.00801	-1.11	0.2	WWOX;RP11-556H2.4	intron_variant;upstream_gene_variant;intron_variant,NMD_transcript_variant
SANAD_Genotype_Joint_model	chr16	79112837	drug_response	0.000358	1.47e-06	0.986	WWOX;RP11-556H2.4	upstream_gene_variant;intron_variant;intron_variant,NMD_transcript_variant
SANAD_Genotype_Univariate	chr16	79112837	drug_response	0.000358	-727	0.329	RP11-556H2.4;WWOX	upstream_gene_variant;intron_variant;intron_variant,NMD_transcript_variant
SANAD_LRR_Joint_model	chr16	79112837	drug_response	-0.00429	0.00455	0.764	RP11-556H2.4;WWOX	intron_variant;intron_variant,NMD_transcript_variant;upstream_gene_variant
SANAD_LRR_univariate	chr16	79112837	drug_response	-0.00429	-0.0886	0.898	WWOX;RP11-556H2.4	intron_variant;upstream_gene_variant;intron_variant,NMD_transcript_variant
SANAD_LRR_Joint_model	chr16	79116879	drug_response	0.00461	0.0127	0.407	RP11-556H2.4;WWOX	intron_variant;intron_variant,NMD_transcript_variant;upstream_gene_variant
SANAD_LRR_univariate	chr16	79116879	drug_response	0.00461	1.57	0.0668	WWOX;RP11-556H2.4	intron_variant;upstream_gene_variant;intron_variant,NMD_transcript_variant
SANAD_LRR_Joint_model	chr16	79117398	drug_response	-0.00613	-0.00449	0.745	WWOX	intron_variant;intron_variant,NMD_transcript_variant
SANAD_LRR_univariate	chr16	79117398	drug_response	-0.00613	-0.44	0.563	WWOX	intron_variant;intron_variant,NMD_transcript_variant
SANAD_LRR_Joint_model	chr16	79117408	drug_response	-0.00555	0.00205	0.85	WWOX	intron_variant;intron_variant,NMD_transcript_variant
SANAD_LRR_univariate	chr16	79117408	drug_response	-0.00555	0.424	0.655	WWOX	intron_variant;intron_variant,NMD_transcript_variant
SANAD_LRR_Joint_model	chr16	79121835	drug_response	0.00137	-0.00576	0.751	WWOX;RP11-556H2.3	intron_variant;intron_variant,NMD_transcript_variant;upstream_gene_variant
SANAD_LRR_univariate	chr16	79121835	drug_response	0.00137	-0.628	0.278	WWOX;RP11-556H2.3	intron_variant;upstream_gene_variant;intron_variant,NMD_transcript_variant
SANAD_LRR_Joint_model	chr16	79126550	drug_response	-0.00357	0.0195	0.256	WWOX;RP11-556H2.3	intron_variant;intron_variant,non_coding_transcript_variant;intron_variant,NMD_transcript_variant
SANAD_LRR_univariate	chr16	79126550	drug_response	-0.00357	1.47	0.132	WWOX;RP11-556H2.3	intron_variant;intron_variant,NMD_transcript_variant;intron_variant,non_coding_transcript_variant
SANAD_LRR_Joint_model	chr16	79130890	drug_response	-0.00862	0.0136	0.418	WWOX;RP11-556H2.3	intron_variant;intron_variant,non_coding_transcript_variant;intron_variant,NMD_transcript_variant
SANAD_LRR_univariate	chr16	79130890	drug_response	-0.00862	0.712	0.358	WWOX;RP11-556H2.3	intron_variant;intron_variant,NMD_transcript_variant;intron_variant,non_coding_transcript_variant
SANAD_Genotype_Joint_model	chr16	79131913	drug_response	0.000432	-0.00454	0.428	WWOX;RP11-556H2.3	intron_variant,non_coding_transcript_variant;intron_variant;intron_variant,NMD_transcript_variant
SANAD_Genotype_Univariate	chr16	79131913	drug_response	0.000432	-4.64	0.214	RP11-556H2.3;WWOX	intron_variant,non_coding_transcript_variant;intron_variant;intron_variant,NMD_transcript_variant
SANAD_LRR_Joint_model	chr16	79131913	drug_response	0.00978	0.000833	0.949	WWOX;RP11-556H2.3	intron_variant;intron_variant,non_coding_transcript_variant;intron_variant,NMD_transcript_variant
SANAD_LRR_univariate	chr16	79131913	drug_response	0.00978	0.0426	0.957	WWOX;RP11-556H2.3	intron_variant;intron_variant,NMD_transcript_variant;intron_variant,non_coding_transcript_variant
SANAD_Genotype_Joint_model	chr16	79136139	drug_response	7.53e-05	-0.000516	0.417	WWOX;RP11-556H2.3;RP11-556H2.2	downstream_gene_variant;upstream_gene_variant;intron_variant;intron_variant,NMD_transcript_variant
SANAD_Genotype_Univariate	chr16	79136139	drug_response	7.53e-05	-138	0.152	RP11-556H2.2;RP11-556H2.3;WWOX	upstream_gene_variant;downstream_gene_variant;intron_variant;intron_variant,NMD_transcript_variant
SANAD_LRR_Joint_model	chr16	79136139	drug_response	0.000333	-0.00432	0.688	WWOX;RP11-556H2.2;RP11-556H2.3	intron_variant;downstream_gene_variant;intron_variant,NMD_transcript_variant;upstream_gene_variant
SANAD_LRR_univariate	chr16	79136139	drug_response	0.000333	-0.386	0.701	WWOX;RP11-556H2.2;RP11-556H2.3	intron_variant;downstream_gene_variant;upstream_gene_variant;intron_variant,NMD_transcript_variant
SANAD_Genotype_Joint_model	chr16	79143983	drug_response	0.00111	-0.000662	0.922	WWOX;RP11-556H2.2	intron_variant,non_coding_transcript_variant;intron_variant;intron_variant,NMD_transcript_variant
SANAD_Genotype_Univariate	chr16	79143983	drug_response	0.00111	-0.625	0.663	RP11-556H2.2;WWOX	intron_variant,non_coding_transcript_variant;intron_variant;intron_variant,NMD_transcript_variant
SANAD_LRR_Joint_model	chr16	79143983	drug_response	0.0158	-0.00666	0.622	WWOX;RP11-556H2.2	intron_variant;intron_variant,non_coding_transcript_variant;intron_variant,NMD_transcript_variant
SANAD_LRR_univariate	chr16	79143983	drug_response	0.0158	-0.694	0.39	WWOX;RP11-556H2.2	intron_variant;intron_variant,NMD_transcript_variant;intron_variant,non_coding_transcript_variant
SANAD_LRR_Joint_model	chr16	79146925	drug_response	0.00478	-0.00887	0.535	WWOX;RP11-556H2.2	intron_variant;downstream_gene_variant;intron_variant,NMD_transcript_variant
SANAD_LRR_univariate	chr16	79146925	drug_response	0.00478	-0.472	0.56	WWOX;RP11-556H2.2	intron_variant;downstream_gene_variant;intron_variant,NMD_transcript_variant
SANAD_LRR_Joint_model	chr16	79147467	drug_response	0.000235	-0.0123	0.399	WWOX;RP11-556H2.2	intron_variant;downstream_gene_variant;intron_variant,NMD_transcript_variant
SANAD_LRR_univariate	chr16	79147467	drug_response	0.000235	-1.07	0.241	WWOX;RP11-556H2.2	intron_variant;downstream_gene_variant;intron_variant,NMD_transcript_variant
SANAD_LRR_Joint_model	chr16	79151251	drug_response	-0.00577	0.00318	0.785	WWOX	intron_variant;intron_variant,NMD_transcript_variant
SANAD_LRR_univariate	chr16	79151251	drug_response	-0.00577	-0.313	0.726	WWOX	intron_variant;intron_variant,NMD_transcript_variant
SANAD_LRR_Joint_model	chr16	79155917	drug_response	0.0127	-0.0144	0.464	WWOX	intron_variant;intron_variant,NMD_transcript_variant
SANAD_LRR_univariate	chr16	79155917	drug_response	0.0127	-0.124	0.843	WWOX	intron_variant;intron_variant,NMD_transcript_variant
SANAD_LRR_Joint_model	chr16	79156222	drug_response	0.00973	-0.0106	0.454	WWOX	intron_variant;intron_variant,NMD_transcript_variant
SANAD_LRR_univariate	chr16	79156222	drug_response	0.00973	-0.881	0.321	WWOX	intron_variant;intron_variant,NMD_transcript_variant
SANAD_LRR_Joint_model	chr16	79158182	drug_response	0.0162	0.00268	0.906	WWOX	intron_variant;intron_variant,NMD_transcript_variant
SANAD_LRR_univariate	chr16	79158182	drug_response	0.0162	0.163	0.718	WWOX	intron_variant;intron_variant,NMD_transcript_variant
SANAD_LRR_Joint_model	chr16	79158698	drug_response	0.00417	-0.0111	0.487	WWOX	intron_variant;intron_variant,NMD_transcript_variant
SANAD_LRR_univariate	chr16	79158698	drug_response	0.00417	-1.17	0.126	WWOX	intron_variant;intron_variant,NMD_transcript_variant
SANAD_LRR_Joint_model	chr16	79161842	drug_response	0.0108	0.0116	0.428	WWOX	intron_variant;intron_variant,NMD_transcript_variant
SANAD_LRR_univariate	chr16	79161842	drug_response	0.0108	1.26	0.151	WWOX	intron_variant;intron_variant,NMD_transcript_variant
SANAD_LRR_Joint_model	chr16	79164032	drug_response	0.0221	-0.0216	0.427	WWOX	intron_variant;intron_variant,NMD_transcript_variant
SANAD_LRR_univariate	chr16	79164032	drug_response	0.0221	-0.222	0.638	WWOX	intron_variant;intron_variant,NMD_transcript_variant
SANAD_Genotype_Joint_model	chr16	79165363	drug_response	0.000403	-4.36e-05	0.443	WWOX	intron_variant;intron_variant,NMD_transcript_variant
SANAD_Genotype_Univariate	chr16	79165363	drug_response	0.000403	-1440	0.129	WWOX	intron_variant;intron_variant,NMD_transcript_variant
SANAD_LRR_Joint_model	chr16	79165363	drug_response	-0.00766	0.00738	0.662	WWOX	intron_variant;intron_variant,NMD_transcript_variant
SANAD_LRR_univariate	chr16	79165363	drug_response	-0.00766	0.0254	0.969	WWOX	intron_variant;intron_variant,NMD_transcript_variant
SANAD_Genotype_Joint_model	chr16	79166404	drug_response	0.000323	-5.15e-05	0.406	WWOX	intron_variant;intron_variant,NMD_transcript_variant
SANAD_Genotype_Univariate	chr16	79166404	drug_response	0.000323	-1430	0.139	WWOX	intron_variant;intron_variant,NMD_transcript_variant
SANAD_LRR_Joint_model	chr16	79166404	drug_response	-0.0192	0.00269	0.84	WWOX	intron_variant;intron_variant,NMD_transcript_variant
SANAD_LRR_univariate	chr16	79166404	drug_response	-0.0192	-0.0893	0.908	WWOX	intron_variant;intron_variant,NMD_transcript_variant
SANAD_LRR_Joint_model	chr16	79171137	drug_response	-0.00699	-0.0146	0.361	WWOX	intron_variant;intron_variant,NMD_transcript_variant
SANAD_LRR_univariate	chr16	79171137	drug_response	-0.00699	-1.7	0.0525	WWOX	intron_variant;intron_variant,NMD_transcript_variant
SANAD_LRR_Joint_model	chr16	79171956	drug_response	-0.0116	-0.0156	0.403	WWOX	intron_variant;intron_variant,NMD_transcript_variant
SANAD_LRR_univariate	chr16	79171956	drug_response	-0.0116	-0.693	0.325	WWOX	intron_variant;intron_variant,NMD_transcript_variant
SANAD_Genotype_Joint_model	chr16	79175411	drug_response	9.85e-05	-2.73e-05	0.771	WWOX	intron_variant;intron_variant,NMD_transcript_variant
SANAD_Genotype_Univariate	chr16	79175411	drug_response	9.85e-05	682	0.357	WWOX	intron_variant;intron_variant,NMD_transcript_variant
SANAD_LRR_Joint_model	chr16	79175411	drug_response	0.0046	-0.00851	0.601	WWOX	intron_variant;intron_variant,NMD_transcript_variant
SANAD_LRR_univariate	chr16	79175411	drug_response	0.0046	-0.273	0.69	WWOX	intron_variant;intron_variant,NMD_transcript_variant
SANAD_LRR_Joint_model	chr16	79176337	drug_response	0.0177	-0.0119	0.519	WWOX	intron_variant;intron_variant,NMD_transcript_variant
SANAD_LRR_univariate	chr16	79176337	drug_response	0.0177	-0.247	0.698	WWOX	intron_variant;intron_variant,NMD_transcript_variant
SANAD_Genotype_Joint_model	chr16	79176524	drug_response	0.00315	-0.00303	0.473	WWOX	intron_variant;intron_variant,NMD_transcript_variant
SANAD_Genotype_Univariate	chr16	79176524	drug_response	0.00315	-0.281	0.918	WWOX	intron_variant;intron_variant,NMD_transcript_variant
SANAD_LRR_Joint_model	chr16	79176524	drug_response	-0.0281	0.0101	0.709	WWOX	intron_variant;intron_variant,NMD_transcript_variant
SANAD_LRR_univariate	chr16	79176524	drug_response	-0.0281	0.292	0.464	WWOX	intron_variant;intron_variant,NMD_transcript_variant
SANAD_Genotype_Joint_model	chr16	79179672	drug_response	0.00198	-2.97e-05	0.893	WWOX	intron_variant;intron_variant,NMD_transcript_variant
SANAD_Genotype_Univariate	chr16	79179672	drug_response	0.00198	282	0.298	WWOX	intron_variant;intron_variant,NMD_transcript_variant
SANAD_LRR_Joint_model	chr16	79179672	drug_response	-0.032	-0.0129	0.605	WWOX	intron_variant;intron_variant,NMD_transcript_variant
SANAD_LRR_univariate	chr16	79179672	drug_response	-0.032	-0.339	0.447	WWOX	intron_variant;intron_variant,NMD_transcript_variant
SANAD_Genotype_Joint_model	chr16	79182284	drug_response	0.00269	-2.02e-05	0.893	WWOX	intron_variant;intron_variant,NMD_transcript_variant
SANAD_Genotype_Univariate	chr16	79182284	drug_response	0.00269	414	0.298	WWOX	intron_variant;intron_variant,NMD_transcript_variant
SANAD_LRR_Joint_model	chr16	79182284	drug_response	-0.0282	0.0134	0.513	WWOX	intron_variant;intron_variant,NMD_transcript_variant
SANAD_LRR_univariate	chr16	79182284	drug_response	-0.0282	0.426	0.46	WWOX	intron_variant;intron_variant,NMD_transcript_variant
SANAD_Genotype_Joint_model	chr16	79183352	drug_response	0.00211	-7.91e-05	0.591	WWOX	intron_variant;intron_variant,NMD_transcript_variant
SANAD_Genotype_Univariate	chr16	79183352	drug_response	0.00211	-44.9	0.546	WWOX	intron_variant;intron_variant,NMD_transcript_variant
SANAD_LRR_Joint_model	chr16	79183352	drug_response	-0.00874	-0.00325	0.816	WWOX	intron_variant;intron_variant,NMD_transcript_variant
SANAD_LRR_univariate	chr16	79183352	drug_response	-0.00874	-0.518	0.486	WWOX	intron_variant;intron_variant,NMD_transcript_variant
SANAD_Genotype_Joint_model	chr16	79185196	drug_response	0.00254	-0.00223	0.559	WWOX	intron_variant;intron_variant,NMD_transcript_variant
SANAD_Genotype_Univariate	chr16	79185196	drug_response	0.00254	-1.75	0.551	WWOX	intron_variant;intron_variant,NMD_transcript_variant
SANAD_LRR_Joint_model	chr16	79185196	drug_response	0.00886	-0.0251	0.351	WWOX	intron_variant;intron_variant,NMD_transcript_variant
SANAD_LRR_univariate	chr16	79185196	drug_response	0.00886	-0.803	0.124	WWOX	intron_variant;intron_variant,NMD_transcript_variant
SANAD_Genotype_Joint_model	chr16	79186196	drug_response	0.00128	-1.45e-05	0.893	WWOX	intron_variant;intron_variant,NMD_transcript_variant
SANAD_Genotype_Univariate	chr16	79186196	drug_response	0.00128	576	0.298	WWOX	intron_variant;intron_variant,NMD_transcript_variant
SANAD_LRR_Joint_model	chr16	79186196	drug_response	0.00213	0.000368	0.985	WWOX	intron_variant;intron_variant,NMD_transcript_variant
SANAD_LRR_univariate	chr16	79186196	drug_response	0.00213	-0.184	0.719	WWOX	intron_variant;intron_variant,NMD_transcript_variant
SANAD_Genotype_Joint_model	chr16	79189702	drug_response	0.00169	0.000855	0.454	WWOX	intron_variant;intron_variant,NMD_transcript_variant
SANAD_Genotype_Univariate	chr16	79189702	drug_response	0.00169	236	0.138	WWOX	intron_variant;intron_variant,NMD_transcript_variant
SANAD_LRR_Joint_model	chr16	79189702	drug_response	-0.0045	-0.00459	0.741	WWOX	intron_variant;intron_variant,NMD_transcript_variant
SANAD_LRR_univariate	chr16	79189702	drug_response	-0.0045	0.273	0.717	WWOX	intron_variant;intron_variant,NMD_transcript_variant
SANAD_Genotype_Joint_model	chr16	79194138	drug_response	0.000521	0.000605	0.439	WWOX	intron_variant;intron_variant,NMD_transcript_variant
SANAD_Genotype_Univariate	chr16	79194138	drug_response	0.000521	102	0.285	WWOX	intron_variant;intron_variant,NMD_transcript_variant
SANAD_LRR_Joint_model	chr16	79194138	drug_response	0.00739	0.00403	0.719	WWOX	intron_variant;intron_variant,NMD_transcript_variant
SANAD_LRR_univariate	chr16	79194138	drug_response	0.00739	0.547	0.566	WWOX	intron_variant;intron_variant,NMD_transcript_variant
SANAD_Genotype_Joint_model	chr16	79196789	drug_response	0.00192	0.00468	0.437	WWOX	intron_variant;intron_variant,NMD_transcript_variant
SANAD_Genotype_Univariate	chr16	79196789	drug_response	0.00192	1280	0.0696	WWOX	intron_variant;intron_variant,NMD_transcript_variant
SANAD_LRR_Joint_model	chr16	79196789	drug_response	-0.0164	0.0173	0.389	WWOX	intron_variant;intron_variant,NMD_transcript_variant
SANAD_LRR_univariate	chr16	79196789	drug_response	-0.0164	0.888	0.189	WWOX	intron_variant;intron_variant,NMD_transcript_variant
SANAD_Genotype_Joint_model	chr16	79197958	drug_response	0.00149	-0.000147	0.481	WWOX	intron_variant;intron_variant,NMD_transcript_variant
SANAD_Genotype_Univariate	chr16	79197958	drug_response	0.00149	-382	0.211	WWOX	intron_variant;intron_variant,NMD_transcript_variant
SANAD_LRR_Joint_model	chr16	79197958	drug_response	0.0172	0.00222	0.89	WWOX	intron_variant;intron_variant,NMD_transcript_variant
SANAD_LRR_univariate	chr16	79197958	drug_response	0.0172	0.304	0.637	WWOX	intron_variant;intron_variant,NMD_transcript_variant
SANAD_Genotype_Joint_model	chr16	79199894	drug_response	0.000779	-4.86e-05	0.582	WWOX	intron_variant;intron_variant,NMD_transcript_variant
SANAD_Genotype_Univariate	chr16	79199894	drug_response	0.000779	-830	0.163	WWOX	intron_variant;intron_variant,NMD_transcript_variant
SANAD_LRR_Joint_model	chr16	79199894	drug_response	-0.0103	0.00293	0.805	WWOX	intron_variant;intron_variant,NMD_transcript_variant
SANAD_LRR_univariate	chr16	79199894	drug_response	-0.0103	0.348	0.693	WWOX	intron_variant;intron_variant,NMD_transcript_variant
SANAD_Genotype_Joint_model	chr16	79200414	drug_response	0.000825	-0.000166	0.39	WWOX	intron_variant;intron_variant,NMD_transcript_variant
SANAD_Genotype_Univariate	chr16	79200414	drug_response	0.000825	-699	0.0404	WWOX	intron_variant;intron_variant,NMD_transcript_variant
SANAD_LRR_Joint_model	chr16	79200414	drug_response	0.00029	-0.0322	0.155	WWOX	intron_variant;intron_variant,NMD_transcript_variant
SANAD_LRR_Joint_modelVS	chr16	79200414	drug_response	0.00029	-0.0261	0.000269	WWOX	intron_variant,NMD_transcript_variant;intron_variant
SANAD_LRR_univariate	chr16	79200414	drug_response	0.00029	-3.7	0.000291	WWOX	intron_variant;intron_variant,NMD_transcript_variant
SANAD_Genotype_Joint_model	chr16	79201179	drug_response	0.00361	-0.000147	0.701	WWOX	intron_variant;intron_variant,NMD_transcript_variant
SANAD_Genotype_Univariate	chr16	79201179	drug_response	0.00361	1.39	0.961	WWOX	intron_variant;intron_variant,NMD_transcript_variant
SANAD_LRR_Joint_model	chr16	79201179	drug_response	0.00654	-0.000901	0.956	WWOX	intron_variant;intron_variant,NMD_transcript_variant
SANAD_LRR_univariate	chr16	79201179	drug_response	0.00654	0.0831	0.895	WWOX	intron_variant;intron_variant,NMD_transcript_variant
SANAD_Genotype_Joint_model	chr16	79203190	drug_response	0.00123	-0.000509	0.444	WWOX	intron_variant;intron_variant,NMD_transcript_variant
SANAD_Genotype_Univariate	chr16	79203190	drug_response	0.00123	-67.8	0.0811	WWOX	intron_variant;intron_variant,NMD_transcript_variant
SANAD_LRR_Joint_model	chr16	79203190	drug_response	-0.00444	-0.00236	0.879	WWOX	intron_variant;intron_variant,NMD_transcript_variant
SANAD_LRR_univariate	chr16	79203190	drug_response	-0.00444	-0.351	0.593	WWOX	intron_variant;intron_variant,NMD_transcript_variant
SANAD_Genotype_Joint_model	chr16	79210703	drug_response	0.00266	-0.000234	0.413	WWOX	intron_variant;intron_variant,NMD_transcript_variant
SANAD_Genotype_Univariate	chr16	79210703	drug_response	0.00266	-538	0.0595	WWOX	intron_variant;intron_variant,NMD_transcript_variant
SANAD_LRR_Joint_model	chr16	79210703	drug_response	0.011	-0.00108	0.929	WWOX	intron_variant;intron_variant,NMD_transcript_variant
SANAD_LRR_univariate	chr16	79210703	drug_response	0.011	0.0217	0.98	WWOX	intron_variant;intron_variant,NMD_transcript_variant
SANAD_Genotype_Joint_model	chr16	79214272	drug_response	0.00118	-0.000814	0.803	WWOX	intron_variant;intron_variant,NMD_transcript_variant
SANAD_Genotype_Univariate	chr16	79214272	drug_response	0.00118	3.34	0.401	WWOX	intron_variant;intron_variant,NMD_transcript_variant
SANAD_LRR_Joint_model	chr16	79214272	drug_response	-0.00532	0.00601	0.682	WWOX	intron_variant;intron_variant,NMD_transcript_variant
SANAD_LRR_univariate	chr16	79214272	drug_response	-0.00532	0.661	0.366	WWOX	intron_variant;intron_variant,NMD_transcript_variant
SANAD_Genotype_Joint_model	chr16	79215085	drug_response	0.00196	-0.00335	0.465	WWOX	intron_variant;intron_variant,NMD_transcript_variant
SANAD_Genotype_Univariate	chr16	79215085	drug_response	0.00196	-3.28	0.237	WWOX	intron_variant;intron_variant,NMD_transcript_variant
SANAD_LRR_Joint_model	chr16	79215085	drug_response	-0.0157	-0.00809	0.634	WWOX	intron_variant;intron_variant,NMD_transcript_variant
SANAD_LRR_univariate	chr16	79215085	drug_response	-0.0157	-0.117	0.857	WWOX	intron_variant;intron_variant,NMD_transcript_variant
SANAD_Genotype_Joint_model	chr16	79216793	drug_response	0.00376	-0.00399	0.511	WWOX	intron_variant;intron_variant,NMD_transcript_variant
SANAD_Genotype_Univariate	chr16	79216793	drug_response	0.00376	-1.4	0.491	WWOX	intron_variant;intron_variant,NMD_transcript_variant
SANAD_LRR_Joint_model	chr16	79216793	drug_response	0.000234	-0.0078	0.816	WWOX	intron_variant;intron_variant,NMD_transcript_variant
SANAD_LRR_univariate	chr16	79216793	drug_response	0.000234	-0.141	0.649	WWOX	intron_variant;intron_variant,NMD_transcript_variant
SANAD_Genotype_Joint_model	chr16	79219583	drug_response	0.002	-0.00396	0.49	WWOX	intron_variant;intron_variant,NMD_transcript_variant
SANAD_Genotype_Univariate	chr16	79219583	drug_response	0.002	-4.46	0.243	WWOX	intron_variant;intron_variant,NMD_transcript_variant
SANAD_LRR_Joint_model	chr16	79219583	drug_response	0.00466	0.00594	0.644	WWOX	intron_variant;intron_variant,NMD_transcript_variant
SANAD_LRR_univariate	chr16	79219583	drug_response	0.00466	0.781	0.362	WWOX	intron_variant;intron_variant,NMD_transcript_variant
SANAD_Genotype_Joint_model	chr16	79221892	drug_response	0.00189	-0.00487	0.444	WWOX	intron_variant;intron_variant,NMD_transcript_variant
SANAD_Genotype_Univariate	chr16	79221892	drug_response	0.00189	-0.748	0.696	WWOX	intron_variant;intron_variant,NMD_transcript_variant
SANAD_LRR_Joint_model	chr16	79221892	drug_response	-0.00271	0.0106	0.503	WWOX	intron_variant;intron_variant,NMD_transcript_variant
SANAD_LRR_univariate	chr16	79221892	drug_response	-0.00271	0.647	0.392	WWOX	intron_variant;intron_variant,NMD_transcript_variant
SANAD_Genotype_Joint_model	chr16	79222393	drug_response	0.00284	0.00254	0.789	WWOX	intron_variant;intron_variant,NMD_transcript_variant
SANAD_Genotype_Univariate	chr16	79222393	drug_response	0.00284	0.673	0.56	WWOX	intron_variant;intron_variant,NMD_transcript_variant
SANAD_LRR_Joint_model	chr16	79222393	drug_response	0.00317	0.00263	0.83	WWOX	intron_variant;intron_variant,NMD_transcript_variant
SANAD_LRR_univariate	chr16	79222393	drug_response	0.00317	0.38	0.652	WWOX	intron_variant;intron_variant,NMD_transcript_variant
SANAD_Genotype_Joint_model	chr16	79225534	drug_response	0.00217	-0.00815	0.413	WWOX	upstream_gene_variant;intron_variant;intron_variant,NMD_transcript_variant
SANAD_Genotype_Univariate	chr16	79225534	drug_response	0.00217	-0.921	0.469	WWOX	upstream_gene_variant;intron_variant;intron_variant,NMD_transcript_variant
SANAD_LRR_Joint_model	chr16	79225534	drug_response	-0.0105	0.0214	0.314	WWOX	intron_variant;intron_variant,NMD_transcript_variant;upstream_gene_variant
SANAD_LRR_univariate	chr16	79225534	drug_response	-0.0105	0.776	0.275	WWOX	intron_variant;upstream_gene_variant;intron_variant,NMD_transcript_variant
SANAD_Genotype_Joint_model	chr16	79227420	drug_response	0.00164	-0.00446	0.426	WWOX	upstream_gene_variant;intron_variant;intron_variant,NMD_transcript_variant
SANAD_Genotype_Univariate	chr16	79227420	drug_response	0.00164	-7.79	0.196	WWOX	upstream_gene_variant;intron_variant;intron_variant,NMD_transcript_variant
SANAD_LRR_Joint_model	chr16	79227420	drug_response	-0.0091	0.00358	0.779	WWOX	intron_variant;intron_variant,NMD_transcript_variant;upstream_gene_variant
SANAD_LRR_univariate	chr16	79227420	drug_response	-0.0091	0.522	0.524	WWOX	intron_variant;upstream_gene_variant;intron_variant,NMD_transcript_variant
SANAD_Genotype_Joint_model	chr16	79228250	drug_response	0.00528	-0.00586	0.381	WWOX	upstream_gene_variant;intron_variant;intron_variant,NMD_transcript_variant
SANAD_Genotype_Univariate	chr16	79228250	drug_response	0.00528	-2.2	0.314	WWOX	upstream_gene_variant;intron_variant;intron_variant,NMD_transcript_variant
SANAD_LRR_Joint_model	chr16	79228250	drug_response	-0.0108	-0.0218	0.483	WWOX	intron_variant;intron_variant,NMD_transcript_variant;upstream_gene_variant
SANAD_LRR_univariate	chr16	79228250	drug_response	-0.0108	-0.311	0.425	WWOX	intron_variant;upstream_gene_variant;intron_variant,NMD_transcript_variant
SANAD_Genotype_Joint_model	chr16	79229465	drug_response	0.00143	0.00017	0.721	WWOX	upstream_gene_variant;intron_variant;intron_variant,NMD_transcript_variant
SANAD_Genotype_Univariate	chr16	79229465	drug_response	0.00143	-7.41	0.734	WWOX	upstream_gene_variant;intron_variant;intron_variant,NMD_transcript_variant
SANAD_LRR_Joint_model	chr16	79229465	drug_response	-0.000542	0.00359	0.772	WWOX	intron_variant;intron_variant,NMD_transcript_variant;upstream_gene_variant
SANAD_LRR_univariate	chr16	79229465	drug_response	-0.000542	0.12	0.888	WWOX	intron_variant;upstream_gene_variant;intron_variant,NMD_transcript_variant
SANAD_Genotype_Joint_model	chr16	79232446	drug_response	0.00196	0.00432	0.466	WWOX	intron_variant,non_coding_transcript_variant;intron_variant;intron_variant,NMD_transcript_variant
SANAD_Genotype_Univariate	chr16	79232446	drug_response	0.00196	2.71	0.374	WWOX	intron_variant,non_coding_transcript_variant;intron_variant;intron_variant,NMD_transcript_variant
SANAD_LRR_Joint_model	chr16	79232446	drug_response	0.00146	-0.00208	0.867	WWOX	intron_variant;intron_variant,non_coding_transcript_variant;intron_variant,NMD_transcript_variant
SANAD_LRR_univariate	chr16	79232446	drug_response	0.00146	-0.454	0.582	WWOX	intron_variant;intron_variant,NMD_transcript_variant;intron_variant,non_coding_transcript_variant
SANAD_Genotype_Joint_model	chr16	79234587	drug_response	0.00201	-0.004	0.466	WWOX	intron_variant,non_coding_transcript_variant;intron_variant;intron_variant,NMD_transcript_variant
SANAD_Genotype_Univariate	chr16	79234587	drug_response	0.00201	-4.23	0.242	WWOX	intron_variant,non_coding_transcript_variant;intron_variant;intron_variant,NMD_transcript_variant
SANAD_LRR_Joint_model	chr16	79234587	drug_response	0.0166	0.00821	0.552	WWOX	intron_variant;intron_variant,non_coding_transcript_variant;intron_variant,NMD_transcript_variant
SANAD_LRR_univariate	chr16	79234587	drug_response	0.0166	1.23	0.141	WWOX	intron_variant;intron_variant,NMD_transcript_variant;intron_variant,non_coding_transcript_variant
SANAD_Genotype_Joint_model	chr16	79234945	drug_response	0.00254	-0.000111	0.985	WWOX	intron_variant,non_coding_transcript_variant;intron_variant;intron_variant,NMD_transcript_variant
SANAD_Genotype_Univariate	chr16	79234945	drug_response	0.00254	-0.524	0.758	WWOX	intron_variant,non_coding_transcript_variant;intron_variant;intron_variant,NMD_transcript_variant
SANAD_LRR_Joint_model	chr16	79234945	drug_response	0.00956	-0.00459	0.79	WWOX	intron_variant;intron_variant,non_coding_transcript_variant;intron_variant,NMD_transcript_variant
SANAD_LRR_univariate	chr16	79234945	drug_response	0.00956	0.152	0.799	WWOX	intron_variant;intron_variant,NMD_transcript_variant;intron_variant,non_coding_transcript_variant
SANAD_Genotype_Joint_model	chr16	79235804	drug_response	0.00237	-0.00233	0.667	WWOX	intron_variant,non_coding_transcript_variant;intron_variant;intron_variant,NMD_transcript_variant
SANAD_Genotype_Univariate	chr16	79235804	drug_response	0.00237	-1.8	0.401	WWOX	intron_variant,non_coding_transcript_variant;intron_variant;intron_variant,NMD_transcript_variant
SANAD_LRR_Joint_model	chr16	79235804	drug_response	-0.00138	0.00389	0.769	WWOX	intron_variant;intron_variant,non_coding_transcript_variant;intron_variant,NMD_transcript_variant
SANAD_LRR_univariate	chr16	79235804	drug_response	-0.00138	0.629	0.424	WWOX	intron_variant;intron_variant,NMD_transcript_variant;intron_variant,non_coding_transcript_variant
SANAD_Genotype_Joint_model	chr16	79236908	drug_response	0.00174	-0.00928	0.344	WWOX	intron_variant,non_coding_transcript_variant;intron_variant;intron_variant,NMD_transcript_variant
SANAD_Genotype_Univariate	chr16	79236908	drug_response	0.00174	-5.76	0.0236	WWOX	intron_variant,non_coding_transcript_variant;intron_variant;intron_variant,NMD_transcript_variant
SANAD_LRR_Joint_model	chr16	79236908	drug_response	0.0116	-0.0176	0.369	WWOX	intron_variant;intron_variant,non_coding_transcript_variant;intron_variant,NMD_transcript_variant
SANAD_LRR_univariate	chr16	79236908	drug_response	0.0116	-1.19	0.0867	WWOX	intron_variant;intron_variant,NMD_transcript_variant;intron_variant,non_coding_transcript_variant
SANAD_Genotype_Joint_model	chr16	79237759	drug_response	0.00136	-0.00605	0.382	WWOX	intron_variant,non_coding_transcript_variant;intron_variant;intron_variant,NMD_transcript_variant
SANAD_Genotype_Univariate	chr16	79237759	drug_response	0.00136	-166	0.0269	WWOX	intron_variant,non_coding_transcript_variant;intron_variant;intron_variant,NMD_transcript_variant
SANAD_LRR_Joint_model	chr16	79237759	drug_response	0.012	-0.0047	0.673	WWOX	intron_variant;intron_variant,non_coding_transcript_variant;intron_variant,NMD_transcript_variant
SANAD_LRR_univariate	chr16	79237759	drug_response	0.012	0.0568	0.953	WWOX	intron_variant;intron_variant,NMD_transcript_variant;intron_variant,non_coding_transcript_variant
SANAD_Genotype_Joint_model	chr16	79239826	drug_response	0.00197	-0.00691	0.381	WWOX	intron_variant,non_coding_transcript_variant;intron_variant;intron_variant,NMD_transcript_variant
SANAD_Genotype_Univariate	chr16	79239826	drug_response	0.00197	-475	0.0156	WWOX	intron_variant,non_coding_transcript_variant;intron_variant;intron_variant,NMD_transcript_variant
SANAD_LRR_Joint_model	chr16	79239826	drug_response	0.00736	-0.00844	0.681	WWOX	intron_variant;intron_variant,non_coding_transcript_variant;intron_variant,NMD_transcript_variant
SANAD_LRR_univariate	chr16	79239826	drug_response	0.00736	-0.22	0.676	WWOX	intron_variant;intron_variant,NMD_transcript_variant;intron_variant,non_coding_transcript_variant
SANAD_Genotype_Joint_model	chr16	79239864	drug_response	0.00189	-0.00612	0.391	WWOX	intron_variant,non_coding_transcript_variant;intron_variant;intron_variant,NMD_transcript_variant
SANAD_Genotype_Univariate	chr16	79239864	drug_response	0.00189	-24.8	0.0498	WWOX	intron_variant,non_coding_transcript_variant;intron_variant;intron_variant,NMD_transcript_variant
SANAD_LRR_Joint_model	chr16	79239864	drug_response	0.00337	-0.00413	0.757	WWOX	intron_variant;intron_variant,non_coding_transcript_variant;intron_variant,NMD_transcript_variant
SANAD_LRR_univariate	chr16	79239864	drug_response	0.00337	-0.329	0.675	WWOX	intron_variant;intron_variant,NMD_transcript_variant;intron_variant,non_coding_transcript_variant
SANAD_Genotype_Joint_model	chr16	79240436	drug_response	0.00226	-0.00747	0.381	WWOX	intron_variant,non_coding_transcript_variant;intron_variant;intron_variant,NMD_transcript_variant
SANAD_Genotype_Univariate	chr16	79240436	drug_response	0.00226	-50.3	0.0349	WWOX	intron_variant,non_coding_transcript_variant;intron_variant;intron_variant,NMD_transcript_variant
SANAD_LRR_Joint_model	chr16	79240436	drug_response	0.0214	-0.0471	0.245	WWOX	intron_variant;intron_variant,non_coding_transcript_variant;intron_variant,NMD_transcript_variant
SANAD_LRR_univariate	chr16	79240436	drug_response	0.0214	-0.81	0.0542	WWOX	intron_variant;intron_variant,NMD_transcript_variant;intron_variant,non_coding_transcript_variant
SANAD_Genotype_Joint_model	chr16	79241754	drug_response	0.00254	-0.00736	0.369	WWOX;RP11-679B19.2	downstream_gene_variant;intron_variant,non_coding_transcript_variant;intron_variant;intron_variant,NMD_transcript_variant
SANAD_Genotype_Univariate	chr16	79241754	drug_response	0.00254	-676	0.00492	RP11-679B19.2;WWOX	intron_variant,non_coding_transcript_variant;downstream_gene_variant;intron_variant;intron_variant,NMD_transcript_variant
SANAD_LRR_Joint_model	chr16	79241754	drug_response	-0.0185	-0.0186	0.435	WWOX;RP11-679B19.2	intron_variant;downstream_gene_variant;intron_variant,non_coding_transcript_variant;intron_variant,NMD_transcript_variant
SANAD_LRR_univariate	chr16	79241754	drug_response	-0.0185	-0.334	0.53	WWOX;RP11-679B19.2	intron_variant;downstream_gene_variant;intron_variant,NMD_transcript_variant;intron_variant,non_coding_transcript_variant
SANAD_Genotype_Joint_model	chr16	79242770	drug_response	0.00314	-0.00937	0.319	WWOX;RP11-679B19.2	downstream_gene_variant;intron_variant,non_coding_transcript_variant;intron_variant;intron_variant,NMD_transcript_variant
SANAD_Genotype_Univariate	chr16	79242770	drug_response	0.00314	-27.6	0.0132	RP11-679B19.2;WWOX	intron_variant,non_coding_transcript_variant;downstream_gene_variant;intron_variant;intron_variant,NMD_transcript_variant
SANAD_LRR_Joint_model	chr16	79242770	drug_response	0.0253	0.021	0.41	WWOX;RP11-679B19.2	intron_variant;downstream_gene_variant;intron_variant,non_coding_transcript_variant;intron_variant,NMD_transcript_variant
SANAD_LRR_univariate	chr16	79242770	drug_response	0.0253	0.672	0.193	WWOX;RP11-679B19.2	intron_variant;downstream_gene_variant;intron_variant,NMD_transcript_variant;intron_variant,non_coding_transcript_variant
SANAD_Genotype_Joint_model	chr16	79243807	drug_response	0.0028	-0.0163	0.264	WWOX;RP11-679B19.2	downstream_gene_variant;intron_variant,non_coding_transcript_variant;intron_variant;intron_variant,NMD_transcript_variant
SANAD_Genotype_Univariate	chr16	79243807	drug_response	0.0028	-16.1	0.00635	RP11-679B19.2;WWOX	intron_variant,non_coding_transcript_variant;downstream_gene_variant;intron_variant;intron_variant,NMD_transcript_variant
SANAD_LRR_Joint_model	chr16	79243807	drug_response	0.00117	-0.00182	0.9	WWOX;RP11-679B19.2	intron_variant;downstream_gene_variant;intron_variant,non_coding_transcript_variant;intron_variant,NMD_transcript_variant
SANAD_LRR_univariate	chr16	79243807	drug_response	0.00117	-0.247	0.727	WWOX;RP11-679B19.2	intron_variant;downstream_gene_variant;intron_variant,NMD_transcript_variant;intron_variant,non_coding_transcript_variant
SANAD_Genotype_Joint_model	chr16	79243843	drug_response	0.00102	-0.00362	0.516	WWOX;RP11-679B19.2	downstream_gene_variant;intron_variant,non_coding_transcript_variant;intron_variant;intron_variant,NMD_transcript_variant
SANAD_Genotype_Univariate	chr16	79243843	drug_response	0.00102	-15.3	0.115	RP11-679B19.2;WWOX	intron_variant,non_coding_transcript_variant;downstream_gene_variant;intron_variant;intron_variant,NMD_transcript_variant
[truncated: 14,505 more rows]

## Sheet: Meta analysis
LRRlongB37_genes.txt	16	78141264	WWOX	intron_variant,NMD_transcript_variant;intron_variant;intron_variant,non_coding_transcript_variant	rem1	-0.000423	-0.331	0.0847	1020
LRRlongB37_genes.txt	16	78141264	WWOX	intron_variant,NMD_transcript_variant;intron_variant;intron_variant,non_coding_transcript_variant	rem_12m	-0.000423	0.0677	0.695	1020
LRRlongB37_genes.txt	16	78141264	WWOX	intron_variant,NMD_transcript_variant;intron_variant;intron_variant,non_coding_transcript_variant	time_first_sez	-0.000423	3.21	0.943	1020
LRRlongB37_genes.txt	16	78141264	WWOX	intron_variant,NMD_transcript_variant;intron_variant;intron_variant,non_coding_transcript_variant	time_rem	-0.000423	4.49	0.897	1020
LRRlongB37_genes.txt	16	78141264	WWOX	intron_variant,NMD_transcript_variant;intron_variant;intron_variant,non_coding_transcript_variant	time_rem_censor	-0.000423	-0.331	0.0847	1020
LRRlongB37_genes.txt	16	78141264	WWOX	intron_variant,NMD_transcript_variant;intron_variant;intron_variant,non_coding_transcript_variant	time_to_sez_censor	-0.000423	0.113	0.522	1020
LRRlongB37_genes.txt	16	78143607	WWOX	intron_variant,NMD_transcript_variant;intron_variant;intron_variant,non_coding_transcript_variant	rem1	0.0362	-0.107	0.673	1020
LRRlongB37_genes.txt	16	78143607	WWOX	intron_variant,NMD_transcript_variant;intron_variant;intron_variant,non_coding_transcript_variant	rem_12m	0.0362	-0.876	0.000349	1020
LRRlongB37_genes.txt	16	78143607	WWOX	intron_variant,NMD_transcript_variant;intron_variant;intron_variant,non_coding_transcript_variant	time_first_sez	0.0362	132	0.035	1020
LRRlongB37_genes.txt	16	78143607	WWOX	intron_variant,NMD_transcript_variant;intron_variant;intron_variant,non_coding_transcript_variant	time_rem	0.0362	-133	0.00599	1020
LRRlongB37_genes.txt	16	78143607	WWOX	intron_variant,NMD_transcript_variant;intron_variant;intron_variant,non_coding_transcript_variant	time_rem_censor	0.0362	-0.107	0.673	1020
LRRlongB37_genes.txt	16	78143607	WWOX	intron_variant,NMD_transcript_variant;intron_variant;intron_variant,non_coding_transcript_variant	time_to_sez_censor	0.0362	-1.15	3.96e-06	1020
LRRlongB37_genes.txt	16	78151746	WWOX	intron_variant,NMD_transcript_variant;intron_variant;intron_variant,non_coding_transcript_variant	rem1	-0.119	-0.0605	0.408	1020
LRRlongB37_genes.txt	16	78151746	WWOX	intron_variant,NMD_transcript_variant;intron_variant;intron_variant,non_coding_transcript_variant	rem_12m	-0.119	0.433	8.87e-10	1020
LRRlongB37_genes.txt	16	78151746	WWOX	intron_variant,NMD_transcript_variant;intron_variant;intron_variant,non_coding_transcript_variant	time_first_sez	-0.119	-61.6	0.00047	1020
LRRlongB37_genes.txt	16	78151746	WWOX	intron_variant,NMD_transcript_variant;intron_variant;intron_variant,non_coding_transcript_variant	time_rem	-0.119	81.1	2.12e-09	1020
LRRlongB37_genes.txt	16	78151746	WWOX	intron_variant,NMD_transcript_variant;intron_variant;intron_variant,non_coding_transcript_variant	time_rem_censor	-0.119	-0.0605	0.408	1020
LRRlongB37_genes.txt	16	78151746	WWOX	intron_variant,NMD_transcript_variant;intron_variant;intron_variant,non_coding_transcript_variant	time_to_sez_censor	-0.119	0.535	4.84e-14	1020
LRRlongB37_genes.txt	16	78158355	WWOX	intron_variant,NMD_transcript_variant;intron_variant;intron_variant,non_coding_transcript_variant	rem1	-0.124	-0.0305	0.723	1020
LRRlongB37_genes.txt	16	78158355	WWOX	intron_variant,NMD_transcript_variant;intron_variant;intron_variant,non_coding_transcript_variant	rem_12m	-0.124	0.458	3.1e-08	1020
LRRlongB37_genes.txt	16	78158355	WWOX	intron_variant,NMD_transcript_variant;intron_variant;intron_variant,non_coding_transcript_variant	time_first_sez	-0.124	-61.4	0.00337	1020
LRRlongB37_genes.txt	16	78158355	WWOX	intron_variant,NMD_transcript_variant;intron_variant;intron_variant,non_coding_transcript_variant	time_rem	-0.124	93.5	6.17e-09	1020
LRRlongB37_genes.txt	16	78158355	WWOX	intron_variant,NMD_transcript_variant;intron_variant;intron_variant,non_coding_transcript_variant	time_rem_censor	-0.124	-0.0305	0.723	1020
LRRlongB37_genes.txt	16	78158355	WWOX	intron_variant,NMD_transcript_variant;intron_variant;intron_variant,non_coding_transcript_variant	time_to_sez_censor	-0.124	0.576	4.74e-12	1020
LRRlongB37_genes.txt	16	78159032	WWOX	upstream_gene_variant;intron_variant,NMD_transcript_variant;intron_variant;intron_variant,non_coding_transcript_variant	rem1	-0.0305	0.0541	0.835	1020
LRRlongB37_genes.txt	16	78159032	WWOX	upstream_gene_variant;intron_variant,NMD_transcript_variant;intron_variant;intron_variant,non_coding_transcript_variant	rem_12m	-0.0305	0.715	0.00393	1020
LRRlongB37_genes.txt	16	78159032	WWOX	upstream_gene_variant;intron_variant,NMD_transcript_variant;intron_variant;intron_variant,non_coding_transcript_variant	time_first_sez	-0.0305	-130	0.0424	1020
LRRlongB37_genes.txt	16	78159032	WWOX	upstream_gene_variant;intron_variant,NMD_transcript_variant;intron_variant;intron_variant,non_coding_transcript_variant	time_rem	-0.0305	103	0.0376	1020
LRRlongB37_genes.txt	16	78159032	WWOX	upstream_gene_variant;intron_variant,NMD_transcript_variant;intron_variant;intron_variant,non_coding_transcript_variant	time_rem_censor	-0.0305	0.0541	0.835	1020
LRRlongB37_genes.txt	16	78159032	WWOX	upstream_gene_variant;intron_variant,NMD_transcript_variant;intron_variant;intron_variant,non_coding_transcript_variant	time_to_sez_censor	-0.0305	0.975	9.88e-05	1020
LRRlongB37_genes.txt	16	78160462	WWOX	upstream_gene_variant;intron_variant,NMD_transcript_variant;intron_variant;intron_variant,non_coding_transcript_variant	rem1	-0.0705	-0.131	0.382	1020
LRRlongB37_genes.txt	16	78160462	WWOX	upstream_gene_variant;intron_variant,NMD_transcript_variant;intron_variant;intron_variant,non_coding_transcript_variant	rem_12m	-0.0705	0.573	6.83e-05	1020
LRRlongB37_genes.txt	16	78160462	WWOX	upstream_gene_variant;intron_variant,NMD_transcript_variant;intron_variant;intron_variant,non_coding_transcript_variant	time_first_sez	-0.0705	-75.1	0.0343	1020
LRRlongB37_genes.txt	16	78160462	WWOX	upstream_gene_variant;intron_variant,NMD_transcript_variant;intron_variant;intron_variant,non_coding_transcript_variant	time_rem	-0.0705	73.5	0.00731	1020
LRRlongB37_genes.txt	16	78160462	WWOX	upstream_gene_variant;intron_variant,NMD_transcript_variant;intron_variant;intron_variant,non_coding_transcript_variant	time_rem_censor	-0.0705	-0.131	0.382	1020
LRRlongB37_genes.txt	16	78160462	WWOX	upstream_gene_variant;intron_variant,NMD_transcript_variant;intron_variant;intron_variant,non_coding_transcript_variant	time_to_sez_censor	-0.0705	0.745	3.33e-07	1020
LRRlongB37_genes.txt	16	78163254	WWOX	upstream_gene_variant;intron_variant,NMD_transcript_variant;intron_variant;intron_variant,non_coding_transcript_variant	rem1	-0.00441	0.403	0.162	1020
LRRlongB37_genes.txt	16	78163254	WWOX	upstream_gene_variant;intron_variant,NMD_transcript_variant;intron_variant;intron_variant,non_coding_transcript_variant	rem_12m	-0.00441	-0.121	0.666	1020
LRRlongB37_genes.txt	16	78163254	WWOX	upstream_gene_variant;intron_variant,NMD_transcript_variant;intron_variant;intron_variant,non_coding_transcript_variant	time_first_sez	-0.00441	36.3	0.617	1020
LRRlongB37_genes.txt	16	78163254	WWOX	upstream_gene_variant;intron_variant,NMD_transcript_variant;intron_variant;intron_variant,non_coding_transcript_variant	time_rem	-0.00441	-6.81	0.903	1020
LRRlongB37_genes.txt	16	78163254	WWOX	upstream_gene_variant;intron_variant,NMD_transcript_variant;intron_variant;intron_variant,non_coding_transcript_variant	time_rem_censor	-0.00441	0.403	0.162	1020
LRRlongB37_genes.txt	16	78163254	WWOX	upstream_gene_variant;intron_variant,NMD_transcript_variant;intron_variant;intron_variant,non_coding_transcript_variant	time_to_sez_censor	-0.00441	0.0894	0.755	1020
LRRlongB37_genes.txt	16	78164235	WWOX	intron_variant,NMD_transcript_variant;intron_variant;intron_variant,non_coding_transcript_variant	rem1	-0.0437	0.106	0.408	1020
LRRlongB37_genes.txt	16	78164235	WWOX	intron_variant,NMD_transcript_variant;intron_variant;intron_variant,non_coding_transcript_variant	rem_12m	-0.0437	0.312	0.0125	1020
LRRlongB37_genes.txt	16	78164235	WWOX	intron_variant,NMD_transcript_variant;intron_variant;intron_variant,non_coding_transcript_variant	time_first_sez	-0.0437	-42.9	0.185	1020
LRRlongB37_genes.txt	16	78164235	WWOX	intron_variant,NMD_transcript_variant;intron_variant;intron_variant,non_coding_transcript_variant	time_rem	-0.0437	82.2	0.000987	1020
LRRlongB37_genes.txt	16	78164235	WWOX	intron_variant,NMD_transcript_variant;intron_variant;intron_variant,non_coding_transcript_variant	time_rem_censor	-0.0437	0.106	0.408	1020
LRRlongB37_genes.txt	16	78164235	WWOX	intron_variant,NMD_transcript_variant;intron_variant;intron_variant,non_coding_transcript_variant	time_to_sez_censor	-0.0437	0.451	0.000335	1020
LRRlongB37_genes.txt	16	78164805	WWOX	intron_variant,NMD_transcript_variant;intron_variant;intron_variant,non_coding_transcript_variant	rem1	-0.000459	0.00797	0.979	1020
LRRlongB37_genes.txt	16	78164805	WWOX	intron_variant,NMD_transcript_variant;intron_variant;intron_variant,non_coding_transcript_variant	rem_12m	-0.000459	0.462	0.103	1020
LRRlongB37_genes.txt	16	78164805	WWOX	intron_variant,NMD_transcript_variant;intron_variant;intron_variant,non_coding_transcript_variant	time_first_sez	-0.000459	-72.7	0.326	1020
LRRlongB37_genes.txt	16	78164805	WWOX	intron_variant,NMD_transcript_variant;intron_variant;intron_variant,non_coding_transcript_variant	time_rem	-0.000459	77.9	0.173	1020
LRRlongB37_genes.txt	16	78164805	WWOX	intron_variant,NMD_transcript_variant;intron_variant;intron_variant,non_coding_transcript_variant	time_rem_censor	-0.000459	0.00797	0.979	1020
LRRlongB37_genes.txt	16	78164805	WWOX	intron_variant,NMD_transcript_variant;intron_variant;intron_variant,non_coding_transcript_variant	time_to_sez_censor	-0.000459	0.741	0.00993	1020
LRRlongB37_genes.txt	16	78170258	WWOX	intron_variant,NMD_transcript_variant;intron_variant;intron_variant,non_coding_transcript_variant	rem1	0.0448	0.111	0.503	1020
LRRlongB37_genes.txt	16	78170258	WWOX	intron_variant,NMD_transcript_variant;intron_variant;intron_variant,non_coding_transcript_variant	rem_12m	0.0448	-0.724	5.76e-06	1020
LRRlongB37_genes.txt	16	78170258	WWOX	intron_variant,NMD_transcript_variant;intron_variant;intron_variant,non_coding_transcript_variant	time_first_sez	0.0448	102	0.0108	1020
LRRlongB37_genes.txt	16	78170258	WWOX	intron_variant,NMD_transcript_variant;intron_variant;intron_variant,non_coding_transcript_variant	time_rem	0.0448	-153	7.5e-07	1020
LRRlongB37_genes.txt	16	78170258	WWOX	intron_variant,NMD_transcript_variant;intron_variant;intron_variant,non_coding_transcript_variant	time_rem_censor	0.0448	0.111	0.503	1020
LRRlongB37_genes.txt	16	78170258	WWOX	intron_variant,NMD_transcript_variant;intron_variant;intron_variant,non_coding_transcript_variant	time_to_sez_censor	0.0448	-0.948	4.55e-09	1020
LRRlongB37_genes.txt	16	78171308	WWOX	intron_variant,NMD_transcript_variant;intron_variant;intron_variant,non_coding_transcript_variant	rem1	-0.0689	-0.00233	0.979	1020
LRRlongB37_genes.txt	16	78171308	WWOX	intron_variant,NMD_transcript_variant;intron_variant;intron_variant,non_coding_transcript_variant	rem_12m	-0.0689	0.345	5.72e-05	1020
LRRlongB37_genes.txt	16	78171308	WWOX	intron_variant,NMD_transcript_variant;intron_variant;intron_variant,non_coding_transcript_variant	time_first_sez	-0.0689	-46.5	0.0336	1020
LRRlongB37_genes.txt	16	78171308	WWOX	intron_variant,NMD_transcript_variant;intron_variant;intron_variant,non_coding_transcript_variant	time_rem	-0.0689	76.6	5.51e-06	1020
LRRlongB37_genes.txt	16	78171308	WWOX	intron_variant,NMD_transcript_variant;intron_variant;intron_variant,non_coding_transcript_variant	time_rem_censor	-0.0689	-0.00233	0.979	1020
LRRlongB37_genes.txt	16	78171308	WWOX	intron_variant,NMD_transcript_variant;intron_variant;intron_variant,non_coding_transcript_variant	time_to_sez_censor	-0.0689	0.458	1.06e-07	1020
LRRlongB37_genes.txt	16	78171686	WWOX	intron_variant,NMD_transcript_variant;intron_variant;intron_variant,non_coding_transcript_variant	rem1	-0.00641	-0.299	0.241	1020
LRRlongB37_genes.txt	16	78171686	WWOX	intron_variant,NMD_transcript_variant;intron_variant;intron_variant,non_coding_transcript_variant	rem_12m	-0.00641	0.438	0.0635	1020
LRRlongB37_genes.txt	16	78171686	WWOX	intron_variant,NMD_transcript_variant;intron_variant;intron_variant,non_coding_transcript_variant	time_first_sez	-0.00641	-129	0.0357	1020
LRRlongB37_genes.txt	16	78171686	WWOX	intron_variant,NMD_transcript_variant;intron_variant;intron_variant,non_coding_transcript_variant	time_rem	-0.00641	69.6	0.142	1020
LRRlongB37_genes.txt	16	78171686	WWOX	intron_variant,NMD_transcript_variant;intron_variant;intron_variant,non_coding_transcript_variant	time_rem_censor	-0.00641	-0.299	0.241	1020
LRRlongB37_genes.txt	16	78171686	WWOX	intron_variant,NMD_transcript_variant;intron_variant;intron_variant,non_coding_transcript_variant	time_to_sez_censor	-0.00641	0.6	0.0125	1020
LRRlongB37_genes.txt	16	78171739	WWOX	intron_variant,NMD_transcript_variant;intron_variant;intron_variant,non_coding_transcript_variant	rem1	-0.00547	-0.0924	0.748	1010
LRRlongB37_genes.txt	16	78171739	WWOX	intron_variant,NMD_transcript_variant;intron_variant;intron_variant,non_coding_transcript_variant	rem_12m	-0.00547	0.0183	0.946	1010
LRRlongB37_genes.txt	16	78171739	WWOX	intron_variant,NMD_transcript_variant;intron_variant;intron_variant,non_coding_transcript_variant	time_first_sez	-0.00547	-58.7	0.405	1010
LRRlongB37_genes.txt	16	78171739	WWOX	intron_variant,NMD_transcript_variant;intron_variant;intron_variant,non_coding_transcript_variant	time_rem	-0.00547	-50.7	0.352	1010
LRRlongB37_genes.txt	16	78171739	WWOX	intron_variant,NMD_transcript_variant;intron_variant;intron_variant,non_coding_transcript_variant	time_rem_censor	-0.00547	-0.0924	0.748	1010
LRRlongB37_genes.txt	16	78171739	WWOX	intron_variant,NMD_transcript_variant;intron_variant;intron_variant,non_coding_transcript_variant	time_to_sez_censor	-0.00547	-0.0746	0.79	1010
LRRlongB37_genes.txt	16	78171819	WWOX	intron_variant,NMD_transcript_variant;intron_variant;intron_variant,non_coding_transcript_variant	rem1	-0.0135	0.0475	0.832	1010
LRRlongB37_genes.txt	16	78171819	WWOX	intron_variant,NMD_transcript_variant;intron_variant;intron_variant,non_coding_transcript_variant	rem_12m	-0.0135	0.0846	0.69	1010
LRRlongB37_genes.txt	16	78171819	WWOX	intron_variant,NMD_transcript_variant;intron_variant;intron_variant,non_coding_transcript_variant	time_first_sez	-0.0135	4.4	0.937	1010
LRRlongB37_genes.txt	16	78171819	WWOX	intron_variant,NMD_transcript_variant;intron_variant;intron_variant,non_coding_transcript_variant	time_rem	-0.0135	33.1	0.44	1010
LRRlongB37_genes.txt	16	78171819	WWOX	intron_variant,NMD_transcript_variant;intron_variant;intron_variant,non_coding_transcript_variant	time_rem_censor	-0.0135	0.0475	0.832	1010
LRRlongB37_genes.txt	16	78171819	WWOX	intron_variant,NMD_transcript_variant;intron_variant;intron_variant,non_coding_transcript_variant	time_to_sez_censor	-0.0135	0.329	0.127	1010
LRRlongB37_genes.txt	16	78171870	WWOX	intron_variant,NMD_transcript_variant;intron_variant;intron_variant,non_coding_transcript_variant	rem1	-0.00308	-0.209	0.427	1010
LRRlongB37_genes.txt	16	78171870	WWOX	intron_variant,NMD_transcript_variant;intron_variant;intron_variant,non_coding_transcript_variant	rem_12m	-0.00308	-0.155	0.537	1010
LRRlongB37_genes.txt	16	78171870	WWOX	intron_variant,NMD_transcript_variant;intron_variant;intron_variant,non_coding_transcript_variant	time_first_sez	-0.00308	-43.2	0.506	1010
LRRlongB37_genes.txt	16	78171870	WWOX	intron_variant,NMD_transcript_variant;intron_variant;intron_variant,non_coding_transcript_variant	time_rem	-0.00308	-24.1	0.632	1010
LRRlongB37_genes.txt	16	78171870	WWOX	intron_variant,NMD_transcript_variant;intron_variant;intron_variant,non_coding_transcript_variant	time_rem_censor	-0.00308	-0.209	0.427	1010
LRRlongB37_genes.txt	16	78171870	WWOX	intron_variant,NMD_transcript_variant;intron_variant;intron_variant,non_coding_transcript_variant	time_to_sez_censor	-0.00308	-0.387	0.131	1010
LRRlongB37_genes.txt	16	78171921	WWOX	intron_variant,NMD_transcript_variant;intron_variant;intron_variant,non_coding_transcript_variant	rem1	-0.078	0.013	0.877	1020
LRRlongB37_genes.txt	16	78171921	WWOX	intron_variant,NMD_transcript_variant;intron_variant;intron_variant,non_coding_transcript_variant	rem_12m	-0.078	0.24	0.00271	1020
LRRlongB37_genes.txt	16	78171921	WWOX	intron_variant,NMD_transcript_variant;intron_variant;intron_variant,non_coding_transcript_variant	time_first_sez	-0.078	-28.7	0.168	1020
LRRlongB37_genes.txt	16	78171921	WWOX	intron_variant,NMD_transcript_variant;intron_variant;intron_variant,non_coding_transcript_variant	time_rem	-0.078	55.3	0.000564	1020
LRRlongB37_genes.txt	16	78171921	WWOX	intron_variant,NMD_transcript_variant;intron_variant;intron_variant,non_coding_transcript_variant	time_rem_censor	-0.078	0.013	0.877	1020
LRRlongB37_genes.txt	16	78171921	WWOX	intron_variant,NMD_transcript_variant;intron_variant;intron_variant,non_coding_transcript_variant	time_to_sez_censor	-0.078	0.352	1.31e-05	1020
LRRlongB37_genes.txt	16	78171974	WWOX	intron_variant,NMD_transcript_variant;intron_variant;intron_variant,non_coding_transcript_variant	rem1	-0.0646	0.0216	0.817	1010
LRRlongB37_genes.txt	16	78171974	WWOX	intron_variant,NMD_transcript_variant;intron_variant;intron_variant,non_coding_transcript_variant	rem_12m	-0.0646	0.255	0.00402	1010
LRRlongB37_genes.txt	16	78171974	WWOX	intron_variant,NMD_transcript_variant;intron_variant;intron_variant,non_coding_transcript_variant	time_first_sez	-0.0646	-24.7	0.281	1010
LRRlongB37_genes.txt	16	78171974	WWOX	intron_variant,NMD_transcript_variant;intron_variant;intron_variant,non_coding_transcript_variant	time_rem	-0.0646	57.5	0.00118	1010
LRRlongB37_genes.txt	16	78171974	WWOX	intron_variant,NMD_transcript_variant;intron_variant;intron_variant,non_coding_transcript_variant	time_rem_censor	-0.0646	0.0216	0.817	1010
LRRlongB37_genes.txt	16	78171974	WWOX	intron_variant,NMD_transcript_variant;intron_variant;intron_variant,non_coding_transcript_variant	time_to_sez_censor	-0.0646	0.375	2.7e-05	1010
LRRlongB37_genes.txt	16	78172025	WWOX	intron_variant,NMD_transcript_variant;intron_variant;intron_variant,non_coding_transcript_variant	rem1	-0.00923	-0.263	0.46	1020
LRRlongB37_genes.txt	16	78172025	WWOX	intron_variant,NMD_transcript_variant;intron_variant;intron_variant,non_coding_transcript_variant	rem_12m	-0.00923	0.134	0.686	1020
LRRlongB37_genes.txt	16	78172025	WWOX	intron_variant,NMD_transcript_variant;intron_variant;intron_variant,non_coding_transcript_variant	time_first_sez	-0.00923	-4.46	0.959	1020
LRRlongB37_genes.txt	16	78172025	WWOX	intron_variant,NMD_transcript_variant;intron_variant;intron_variant,non_coding_transcript_variant	time_rem	-0.00923	88.9	0.183	1020
LRRlongB37_genes.txt	16	78172025	WWOX	intron_variant,NMD_transcript_variant;intron_variant;intron_variant,non_coding_transcript_variant	time_rem_censor	-0.00923	-0.263	0.46	1020
LRRlongB37_genes.txt	16	78172025	WWOX	intron_variant,NMD_transcript_variant;intron_variant;intron_variant,non_coding_transcript_variant	time_to_sez_censor	-0.00923	0.495	0.143	1020
LRRlongB37_genes.txt	16	78172076	WWOX	intron_variant,NMD_transcript_variant;intron_variant;intron_variant,non_coding_transcript_variant	rem1	-0.0534	-0.0211	0.859	1010
LRRlongB37_genes.txt	16	78172076	WWOX	intron_variant,NMD_transcript_variant;intron_variant;intron_variant,non_coding_transcript_variant	rem_12m	-0.0534	0.312	0.0053	1010
LRRlongB37_genes.txt	16	78172076	WWOX	intron_variant,NMD_transcript_variant;intron_variant;intron_variant,non_coding_transcript_variant	time_first_sez	-0.0534	-42.3	0.146	1010
LRRlongB37_genes.txt	16	78172076	WWOX	intron_variant,NMD_transcript_variant;intron_variant;intron_variant,non_coding_transcript_variant	time_rem	-0.0534	57.3	0.00997	1010
LRRlongB37_genes.txt	16	78172076	WWOX	intron_variant,NMD_transcript_variant;intron_variant;intron_variant,non_coding_transcript_variant	time_rem_censor	-0.0534	-0.0211	0.859	1010
LRRlongB37_genes.txt	16	78172076	WWOX	intron_variant,NMD_transcript_variant;intron_variant;intron_variant,non_coding_transcript_variant	time_to_sez_censor	-0.0534	0.46	4.37e-05	1010
LRRlongB37_genes.txt	16	78172098	WWOX	intron_variant,NMD_transcript_variant;intron_variant;intron_variant,non_coding_transcript_variant	rem1	0.00402	-0.238	0.561	626
LRRlongB37_genes.txt	16	78172098	WWOX	intron_variant,NMD_transcript_variant;intron_variant;intron_variant,non_coding_transcript_variant	rem_12m	0.00402	0.286	0.49	626
LRRlongB37_genes.txt	16	78172098	WWOX	intron_variant,NMD_transcript_variant;intron_variant;intron_variant,non_coding_transcript_variant	time_first_sez	0.00402	5.63	0.958	626
LRRlongB37_genes.txt	16	78172098	WWOX	intron_variant,NMD_transcript_variant;intron_variant;intron_variant,non_coding_transcript_variant	time_rem	0.00402	127	0.154	626
LRRlongB37_genes.txt	16	78172098	WWOX	intron_variant,NMD_transcript_variant;intron_variant;intron_variant,non_coding_transcript_variant	time_rem_censor	0.00402	-0.238	0.561	626
LRRlongB37_genes.txt	16	78172098	WWOX	intron_variant,NMD_transcript_variant;intron_variant;intron_variant,non_coding_transcript_variant	time_to_sez_censor	0.00402	0.131	0.774	626
LRRlongB37_genes.txt	16	78172174	WWOX	intron_variant,NMD_transcript_variant;intron_variant;intron_variant,non_coding_transcript_variant	rem1	-0.0133	0.0791	0.806	624
LRRlongB37_genes.txt	16	78172174	WWOX	intron_variant,NMD_transcript_variant;intron_variant;intron_variant,non_coding_transcript_variant	rem_12m	-0.0133	-0.381	0.254	624
LRRlongB37_genes.txt	16	78172174	WWOX	intron_variant,NMD_transcript_variant;intron_variant;intron_variant,non_coding_transcript_variant	time_first_sez	-0.0133	124	0.141	624
LRRlongB37_genes.txt	16	78172174	WWOX	intron_variant,NMD_transcript_variant;intron_variant;intron_variant,non_coding_transcript_variant	time_rem	-0.0133	-66.8	0.346	624
LRRlongB37_genes.txt	16	78172174	WWOX	intron_variant,NMD_transcript_variant;intron_variant;intron_variant,non_coding_transcript_variant	time_rem_censor	-0.0133	0.0791	0.806	624
LRRlongB37_genes.txt	16	78172174	WWOX	intron_variant,NMD_transcript_variant;intron_variant;intron_variant,non_coding_transcript_variant	time_to_sez_censor	-0.0133	-0.461	0.208	624
LRRlongB37_genes.txt	16	78172252	WWOX	intron_variant,NMD_transcript_variant;intron_variant;intron_variant,non_coding_transcript_variant	rem1	-0.0287	0.107	0.737	626
LRRlongB37_genes.txt	16	78172252	WWOX	intron_variant,NMD_transcript_variant;intron_variant;intron_variant,non_coding_transcript_variant	rem_12m	-0.0287	-0.328	0.321	626
LRRlongB37_genes.txt	16	78172252	WWOX	intron_variant,NMD_transcript_variant;intron_variant;intron_variant,non_coding_transcript_variant	time_first_sez	-0.0287	64	0.442	626
LRRlongB37_genes.txt	16	78172252	WWOX	intron_variant,NMD_transcript_variant;intron_variant;intron_variant,non_coding_transcript_variant	time_rem	-0.0287	-113	0.108	626
LRRlongB37_genes.txt	16	78172252	WWOX	intron_variant,NMD_transcript_variant;intron_variant;intron_variant,non_coding_transcript_variant	time_rem_censor	-0.0287	0.107	0.737	626
LRRlongB37_genes.txt	16	78172252	WWOX	intron_variant,NMD_transcript_variant;intron_variant;intron_variant,non_coding_transcript_variant	time_to_sez_censor	-0.0287	-0.331	0.359	626
LRRlongB37_genes.txt	16	78174052	WWOX	intron_variant,NMD_transcript_variant;intron_variant;intron_variant,non_coding_transcript_variant	rem1	-0.0775	-0.0371	0.659	1020
LRRlongB37_genes.txt	16	78174052	WWOX	intron_variant,NMD_transcript_variant;intron_variant;intron_variant,non_coding_transcript_variant	rem_12m	-0.0775	0.293	0.000214	1020
LRRlongB37_genes.txt	16	78174052	WWOX	intron_variant,NMD_transcript_variant;intron_variant;intron_variant,non_coding_transcript_variant	time_first_sez	-0.0775	-42.3	0.0381	1020
LRRlongB37_genes.txt	16	78174052	WWOX	intron_variant,NMD_transcript_variant;intron_variant;intron_variant,non_coding_transcript_variant	time_rem	-0.0775	54.8	0.000495	1020
LRRlongB37_genes.txt	16	78174052	WWOX	intron_variant,NMD_transcript_variant;intron_variant;intron_variant,non_coding_transcript_variant	time_rem_censor	-0.0775	-0.0371	0.659	1020
LRRlongB37_genes.txt	16	78174052	WWOX	intron_variant,NMD_transcript_variant;intron_variant;intron_variant,non_coding_transcript_variant	time_to_sez_censor	-0.0775	0.399	5.05e-07	1020
LRRlongB37_genes.txt	16	78180765	WWOX	intron_variant,NMD_transcript_variant;intron_variant;intron_variant,non_coding_transcript_variant	rem1	0.018	-0.232	0.633	1020
LRRlongB37_genes.txt	16	78180765	WWOX	intron_variant,NMD_transcript_variant;intron_variant;intron_variant,non_coding_transcript_variant	rem_12m	0.018	0.118	0.796	1020
LRRlongB37_genes.txt	16	78180765	WWOX	intron_variant,NMD_transcript_variant;intron_variant;intron_variant,non_coding_transcript_variant	time_first_sez	0.018	-97.1	0.413	1020
LRRlongB37_genes.txt	16	78180765	WWOX	intron_variant,NMD_transcript_variant;intron_variant;intron_variant,non_coding_transcript_variant	time_rem	0.018	-36.5	0.69	1020
LRRlongB37_genes.txt	16	78180765	WWOX	intron_variant,NMD_transcript_variant;intron_variant;intron_variant,non_coding_transcript_variant	time_rem_censor	0.018	-0.232	0.633	1020
LRRlongB37_genes.txt	16	78180765	WWOX	intron_variant,NMD_transcript_variant;intron_variant;intron_variant,non_coding_transcript_variant	time_to_sez_censor	0.018	0.305	0.514	1020
LRRlongB37_genes.txt	16	78181986	WWOX	intron_variant,NMD_transcript_variant;intron_variant;intron_variant,non_coding_transcript_variant	rem1	0.00924	0.267	0.486	1020
LRRlongB37_genes.txt	16	78181986	WWOX	intron_variant,NMD_transcript_variant;intron_variant;intron_variant,non_coding_transcript_variant	rem_12m	0.00924	-0.802	0.0292	1020
LRRlongB37_genes.txt	16	78181986	WWOX	intron_variant,NMD_transcript_variant;intron_variant;intron_variant,non_coding_transcript_variant	time_first_sez	0.00924	161	0.0883	1020
LRRlongB37_genes.txt	16	78181986	WWOX	intron_variant,NMD_transcript_variant;intron_variant;intron_variant,non_coding_transcript_variant	time_rem	0.00924	-202	0.00567	1020
LRRlongB37_genes.txt	16	78181986	WWOX	intron_variant,NMD_transcript_variant;intron_variant;intron_variant,non_coding_transcript_variant	time_rem_censor	0.00924	0.267	0.486	1020
LRRlongB37_genes.txt	16	78181986	WWOX	intron_variant,NMD_transcript_variant;intron_variant;intron_variant,non_coding_transcript_variant	time_to_sez_censor	0.00924	-0.725	0.0553	1020
LRRlongB37_genes.txt	16	78183726	WWOX	intron_variant,NMD_transcript_variant;intron_variant;intron_variant,non_coding_transcript_variant	rem1	-0.0225	-0.179	0.386	1020
LRRlongB37_genes.txt	16	78183726	WWOX	intron_variant,NMD_transcript_variant;intron_variant;intron_variant,non_coding_transcript_variant	rem_12m	-0.0225	0.625	0.00133	1020
LRRlongB37_genes.txt	16	78183726	WWOX	intron_variant,NMD_transcript_variant;intron_variant;intron_variant,non_coding_transcript_variant	time_first_sez	-0.0225	-68.5	0.163	1020
LRRlongB37_genes.txt	16	78183726	WWOX	intron_variant,NMD_transcript_variant;intron_variant;intron_variant,non_coding_transcript_variant	time_rem	-0.0225	81.2	0.0323	1020
LRRlongB37_genes.txt	16	78183726	WWOX	intron_variant,NMD_transcript_variant;intron_variant;intron_variant,non_coding_transcript_variant	time_rem_censor	-0.0225	-0.179	0.386	1020
LRRlongB37_genes.txt	16	78183726	WWOX	intron_variant,NMD_transcript_variant;intron_variant;intron_variant,non_coding_transcript_variant	time_to_sez_censor	-0.0225	0.728	0.000182	1020
LRRlongB37_genes.txt	16	78183814	WWOX	intron_variant,NMD_transcript_variant;intron_variant;intron_variant,non_coding_transcript_variant	rem1	-0.0151	-0.253	0.221	1020
LRRlongB37_genes.txt	16	78183814	WWOX	intron_variant,NMD_transcript_variant;intron_variant;intron_variant,non_coding_transcript_variant	rem_12m	-0.0151	0.543	0.00419	1020
LRRlongB37_genes.txt	16	78183814	WWOX	intron_variant,NMD_transcript_variant;intron_variant;intron_variant,non_coding_transcript_variant	time_first_sez	-0.0151	-75.1	0.119	1020
LRRlongB37_genes.txt	16	78183814	WWOX	intron_variant,NMD_transcript_variant;intron_variant;intron_variant,non_coding_transcript_variant	time_rem	-0.0151	62	0.096	1020
LRRlongB37_genes.txt	16	78183814	WWOX	intron_variant,NMD_transcript_variant;intron_variant;intron_variant,non_coding_transcript_variant	time_rem_censor	-0.0151	-0.253	0.221	1020
LRRlongB37_genes.txt	16	78183814	WWOX	intron_variant,NMD_transcript_variant;intron_variant;intron_variant,non_coding_transcript_variant	time_to_sez_censor	-0.0151	0.704	0.000231	1020
LRRlongB37_genes.txt	16	78187054	WWOX	intron_variant,NMD_transcript_variant;intron_variant;intron_variant,non_coding_transcript_variant	rem1	0.0168	0.151	0.707	1020
LRRlongB37_genes.txt	16	78187054	WWOX	intron_variant,NMD_transcript_variant;intron_variant;intron_variant,non_coding_transcript_variant	rem_12m	0.0168	-0.726	0.0553	1020
LRRlongB37_genes.txt	16	78187054	WWOX	intron_variant,NMD_transcript_variant;intron_variant;intron_variant,non_coding_transcript_variant	time_first_sez	0.0168	38.3	0.697	1020
LRRlongB37_genes.txt	16	78187054	WWOX	intron_variant,NMD_transcript_variant;intron_variant;intron_variant,non_coding_transcript_variant	time_rem	0.0168	-142	0.0618	1020
LRRlongB37_genes.txt	16	78187054	WWOX	intron_variant,NMD_transcript_variant;intron_variant;intron_variant,non_coding_transcript_variant	time_rem_censor	0.0168	0.151	0.707	1020
LRRlongB37_genes.txt	16	78187054	WWOX	intron_variant,NMD_transcript_variant;intron_variant;intron_variant,non_coding_transcript_variant	time_to_sez_censor	0.0168	-0.837	0.0314	1020
LRRlongB37_genes.txt	16	78187380	WWOX	intron_variant,NMD_transcript_variant;intron_variant;intron_variant,non_coding_transcript_variant	rem1	0.00936	0.0504	0.878	1020
LRRlongB37_genes.txt	16	78187380	WWOX	intron_variant,NMD_transcript_variant;intron_variant;intron_variant,non_coding_transcript_variant	rem_12m	0.00936	-0.151	0.627	1020
LRRlongB37_genes.txt	16	78187380	WWOX	intron_variant,NMD_transcript_variant;intron_variant;intron_variant,non_coding_transcript_variant	time_first_sez	0.00936	72.7	0.367	1020
LRRlongB37_genes.txt	16	78187380	WWOX	intron_variant,NMD_transcript_variant;intron_variant;intron_variant,non_coding_transcript_variant	time_rem	0.00936	-74.8	0.23	1020
LRRlongB37_genes.txt	16	78187380	WWOX	intron_variant,NMD_transcript_variant;intron_variant;intron_variant,non_coding_transcript_variant	time_rem_censor	0.00936	0.0504	0.878	1020
LRRlongB37_genes.txt	16	78187380	WWOX	intron_variant,NMD_transcript_variant;intron_variant;intron_variant,non_coding_transcript_variant	time_to_sez_censor	0.00936	0.0852	0.788	1020
LRRlongB37_genes.txt	16	78188800	WWOX	intron_variant,NMD_transcript_variant;intron_variant;intron_variant,non_coding_transcript_variant	rem1	0.0345	0.0968	0.763	1020
LRRlongB37_genes.txt	16	78188800	WWOX	intron_variant,NMD_transcript_variant;intron_variant;intron_variant,non_coding_transcript_variant	rem_12m	0.0345	-1.79	1.07e-08	1020
LRRlongB37_genes.txt	16	78188800	WWOX	intron_variant,NMD_transcript_variant;intron_variant;intron_variant,non_coding_transcript_variant	time_first_sez	0.0345	250	0.00145	1020
LRRlongB37_genes.txt	16	78188800	WWOX	intron_variant,NMD_transcript_variant;intron_variant;intron_variant,non_coding_transcript_variant	time_rem	0.0345	-312	2.55e-07	1020
LRRlongB37_genes.txt	16	78188800	WWOX	intron_variant,NMD_transcript_variant;intron_variant;intron_variant,non_coding_transcript_variant	time_rem_censor	0.0345	0.0968	0.763	1020
LRRlongB37_genes.txt	16	78188800	WWOX	intron_variant,NMD_transcript_variant;intron_variant;intron_variant,non_coding_transcript_variant	time_to_sez_censor	0.0345	-2.01	2.59e-10	1020
LRRlongB37_genes.txt	16	78190218	WWOX	intron_variant,NMD_transcript_variant;intron_variant;intron_variant,non_coding_transcript_variant	rem1	0.0374	0.0576	0.736	1020
LRRlongB37_genes.txt	16	78190218	WWOX	intron_variant,NMD_transcript_variant;intron_variant;intron_variant,non_coding_transcript_variant	rem_12m	0.0374	-0.798	1.07e-06	1020
LRRlongB37_genes.txt	16	78190218	WWOX	intron_variant,NMD_transcript_variant;intron_variant;intron_variant,non_coding_transcript_variant	time_first_sez	0.0374	105	0.0116	1020
LRRlongB37_genes.txt	16	78190218	WWOX	intron_variant,NMD_transcript_variant;intron_variant;intron_variant,non_coding_transcript_variant	time_rem	0.0374	-162	4.1e-07	1020
LRRlongB37_genes.txt	16	78190218	WWOX	intron_variant,NMD_transcript_variant;intron_variant;intron_variant,non_coding_transcript_variant	time_rem_censor	0.0374	0.0576	0.736	1020
LRRlongB37_genes.txt	16	78190218	WWOX	intron_variant,NMD_transcript_variant;intron_variant;intron_variant,non_coding_transcript_variant	time_to_sez_censor	0.0374	-0.991	1.75e-09	1020
LRRlongB37_genes.txt	16	78191770	WWOX	intron_variant,NMD_transcript_variant;intron_variant;intron_variant,non_coding_transcript_variant	rem1	-0.00139	0.0654	0.742	1020
LRRlongB37_genes.txt	16	78191770	WWOX	intron_variant,NMD_transcript_variant;intron_variant;intron_variant,non_coding_transcript_variant	rem_12m	-0.00139	0.341	0.0736	1020
LRRlongB37_genes.txt	16	78191770	WWOX	intron_variant,NMD_transcript_variant;intron_variant;intron_variant,non_coding_transcript_variant	time_first_sez	-0.00139	-53.7	0.274	1020
LRRlongB37_genes.txt	16	78191770	WWOX	intron_variant,NMD_transcript_variant;intron_variant;intron_variant,non_coding_transcript_variant	time_rem	-0.00139	87.6	0.0209	1020
LRRlongB37_genes.txt	16	78191770	WWOX	intron_variant,NMD_transcript_variant;intron_variant;intron_variant,non_coding_transcript_variant	time_rem_censor	-0.00139	0.0654	0.742	1020
LRRlongB37_genes.txt	16	78191770	WWOX	intron_variant,NMD_transcript_variant;intron_variant;intron_variant,non_coding_transcript_variant	time_to_sez_censor	-0.00139	0.497	0.00999	1020
LRRlongB37_genes.txt	16	78200278	WWOX	intron_variant,NMD_transcript_variant;intron_variant;intron_variant,non_coding_transcript_variant	rem1	-0.115	-0.017	0.829	1020
LRRlongB37_genes.txt	16	78200278	WWOX	intron_variant,NMD_transcript_variant;intron_variant;intron_variant,non_coding_transcript_variant	rem_12m	-0.115	0.37	1.18e-06	1020
LRRlongB37_genes.txt	16	78200278	WWOX	intron_variant,NMD_transcript_variant;intron_variant;intron_variant,non_coding_transcript_variant	time_first_sez	-0.115	-49.3	0.0107	1020
LRRlongB37_genes.txt	16	78200278	WWOX	intron_variant,NMD_transcript_variant;intron_variant;intron_variant,non_coding_transcript_variant	time_rem	-0.115	70.3	2.29e-06	1020
LRRlongB37_genes.txt	16	78200278	WWOX	intron_variant,NMD_transcript_variant;intron_variant;intron_variant,non_coding_transcript_variant	time_rem_censor	-0.115	-0.017	0.829	1020
LRRlongB37_genes.txt	16	78200278	WWOX	intron_variant,NMD_transcript_variant;intron_variant;intron_variant,non_coding_transcript_variant	time_to_sez_censor	-0.115	0.471	7.54e-10	1020
LRRlongB37_genes.txt	16	78201753	WWOX	intron_variant,NMD_transcript_variant;intron_variant;intron_variant,non_coding_transcript_variant	rem1	0.0468	0.0467	0.806	1020
LRRlongB37_genes.txt	16	78201753	WWOX	intron_variant,NMD_transcript_variant;intron_variant;intron_variant,non_coding_transcript_variant	rem_12m	0.0468	-0.641	0.000465	1020
LRRlongB37_genes.txt	16	78201753	WWOX	intron_variant,NMD_transcript_variant;intron_variant;intron_variant,non_coding_transcript_variant	time_first_sez	0.0468	107	0.0218	1020
LRRlongB37_genes.txt	16	78201753	WWOX	intron_variant,NMD_transcript_variant;intron_variant;intron_variant,non_coding_transcript_variant	time_rem	0.0468	-149	3.18e-05	1020
LRRlongB37_genes.txt	16	78201753	WWOX	intron_variant,NMD_transcript_variant;intron_variant;intron_variant,non_coding_transcript_variant	time_rem_censor	0.0468	0.0467	0.806	1020
LRRlongB37_genes.txt	16	78201753	WWOX	intron_variant,NMD_transcript_variant;intron_variant;intron_variant,non_coding_transcript_variant	time_to_sez_censor	0.0468	-0.914	1.16e-06	1020
LRRlongB37_genes.txt	16	78201953	WWOX	intron_variant,NMD_transcript_variant;intron_variant;intron_variant,non_coding_transcript_variant	rem1	-0.0263	-0.0868	0.649	1020
LRRlongB37_genes.txt	16	78201953	WWOX	intron_variant,NMD_transcript_variant;intron_variant;intron_variant,non_coding_transcript_variant	rem_12m	-0.0263	0.762	3.26e-05	1020
LRRlongB37_genes.txt	16	78201953	WWOX	intron_variant,NMD_transcript_variant;intron_variant;intron_variant,non_coding_transcript_variant	time_first_sez	-0.0263	-105	0.023	1020
LRRlongB37_genes.txt	16	78201953	WWOX	intron_variant,NMD_transcript_variant;intron_variant;intron_variant,non_coding_transcript_variant	time_rem	-0.0263	153	1.79e-05	1020
LRRlongB37_genes.txt	16	78201953	WWOX	intron_variant,NMD_transcript_variant;intron_variant;intron_variant,non_coding_transcript_variant	time_rem_censor	-0.0263	-0.0868	0.649	1020
LRRlongB37_genes.txt	16	78201953	WWOX	intron_variant,NMD_transcript_variant;intron_variant;intron_variant,non_coding_transcript_variant	time_to_sez_censor	-0.0263	0.959	1.92e-07	1020
LRRlongB37_genes.txt	16	78204334	WWOX	intron_variant,NMD_transcript_variant;intron_variant;intron_variant,non_coding_transcript_variant	rem1	-0.00755	-0.27	0.478	1020
LRRlongB37_genes.txt	16	78204334	WWOX	intron_variant,NMD_transcript_variant;intron_variant;intron_variant,non_coding_transcript_variant	rem_12m	-0.00755	0.173	0.622	1020
LRRlongB37_genes.txt	16	78204334	WWOX	intron_variant,NMD_transcript_variant;intron_variant;intron_variant,non_coding_transcript_variant	time_first_sez	-0.00755	-47	0.607	1020
LRRlongB37_genes.txt	16	78204334	WWOX	intron_variant,NMD_transcript_variant;intron_variant;intron_variant,non_coding_transcript_variant	time_rem	-0.00755	-92	0.193	1020
LRRlongB37_genes.txt	16	78204334	WWOX	intron_variant,NMD_transcript_variant;intron_variant;intron_variant,non_coding_transcript_variant	time_rem_censor	-0.00755	-0.27	0.478	1020
LRRlongB37_genes.txt	16	78204334	WWOX	intron_variant,NMD_transcript_variant;intron_variant;intron_variant,non_coding_transcript_variant	time_to_sez_censor	-0.00755	0.373	0.295	1020
LRRlongB37_genes.txt	16	78205175	WWOX	intron_variant,NMD_transcript_variant;intron_variant;intron_variant,non_coding_transcript_variant	rem1	0.0361	0.185	0.451	1020
LRRlongB37_genes.txt	16	78205175	WWOX	intron_variant,NMD_transcript_variant;intron_variant;intron_variant,non_coding_transcript_variant	rem_12m	0.0361	-1.34	1.42e-08	1020
LRRlongB37_genes.txt	16	78205175	WWOX	intron_variant,NMD_transcript_variant;intron_variant;intron_variant,non_coding_transcript_variant	time_first_sez	0.0361	179	0.00278	1020
LRRlongB37_genes.txt	16	78205175	WWOX	intron_variant,NMD_transcript_variant;intron_variant;intron_variant,non_coding_transcript_variant	time_rem	0.0361	-270	3.69e-09	1020
LRRlongB37_genes.txt	16	78205175	WWOX	intron_variant,NMD_transcript_variant;intron_variant;intron_variant,non_coding_transcript_variant	time_rem_censor	0.0361	0.185	0.451	1020
LRRlongB37_genes.txt	16	78205175	WWOX	intron_variant,NMD_transcript_variant;intron_variant;intron_variant,non_coding_transcript_variant	time_to_sez_censor	0.0361	-1.7	1.72e-12	1020
LRRlongB37_genes.txt	16	78205562	WWOX	intron_variant,NMD_transcript_variant;intron_variant;intron_variant,non_coding_transcript_variant	rem1	0.0471	0.145	0.389	1020
LRRlongB37_genes.txt	16	78205562	WWOX	intron_variant,NMD_transcript_variant;intron_variant;intron_variant,non_coding_transcript_variant	rem_12m	0.0471	-1.02	1.56e-09	1020
LRRlongB37_genes.txt	16	78205562	WWOX	intron_variant,NMD_transcript_variant;intron_variant;intron_variant,non_coding_transcript_variant	time_first_sez	0.0471	149	0.000267	1020
LRRlongB37_genes.txt	16	78205562	WWOX	intron_variant,NMD_transcript_variant;intron_variant;intron_variant,non_coding_transcript_variant	time_rem	0.0471	-177	1.52e-08	1020
LRRlongB37_genes.txt	16	78205562	WWOX	intron_variant,NMD_transcript_variant;intron_variant;intron_variant,non_coding_transcript_variant	time_rem_censor	0.0471	0.145	0.389	1020
LRRlongB37_genes.txt	16	78205562	WWOX	intron_variant,NMD_transcript_variant;intron_variant;intron_variant,non_coding_transcript_variant	time_to_sez_censor	0.0471	-1.21	9.23e-13	1020
LRRlongB37_genes.txt	16	78206556	WWOX	intron_variant,NMD_transcript_variant;intron_variant;intron_variant,non_coding_transcript_variant	rem1	0.0391	0.00823	0.97	1020
LRRlongB37_genes.txt	16	78206556	WWOX	intron_variant,NMD_transcript_variant;intron_variant;intron_variant,non_coding_transcript_variant	rem_12m	0.0391	-1.03	8.43e-06	1020
LRRlongB37_genes.txt	16	78206556	WWOX	intron_variant,NMD_transcript_variant;intron_variant;intron_variant,non_coding_transcript_variant	time_first_sez	0.0391	127	0.0187	1020
LRRlongB37_genes.txt	16	78206556	WWOX	intron_variant,NMD_transcript_variant;intron_variant;intron_variant,non_coding_transcript_variant	time_rem	0.0391	-186	8.02e-06	1020
LRRlongB37_genes.txt	16	78206556	WWOX	intron_variant,NMD_transcript_variant;intron_variant;intron_variant,non_coding_transcript_variant	time_rem_censor	0.0391	0.00823	0.97	1020
LRRlongB37_genes.txt	16	78206556	WWOX	intron_variant,NMD_transcript_variant;intron_variant;intron_variant,non_coding_transcript_variant	time_to_sez_censor	0.0391	-1.34	1.32e-08	1020
LRRlongB37_genes.txt	16	78206954	WWOX	intron_variant,NMD_transcript_variant;intron_variant;intron_variant,non_coding_transcript_variant	rem1	0.0157	-0.297	0.39	1020
LRRlongB37_genes.txt	16	78206954	WWOX	intron_variant,NMD_transcript_variant;intron_variant;intron_variant,non_coding_transcript_variant	rem_12m	0.0157	-0.353	0.287	1020
LRRlongB37_genes.txt	16	78206954	WWOX	intron_variant,NMD_transcript_variant;intron_variant;intron_variant,non_coding_transcript_variant	time_first_sez	0.0157	28.8	0.724	1020
LRRlongB37_genes.txt	16	78206954	WWOX	intron_variant,NMD_transcript_variant;intron_variant;intron_variant,non_coding_transcript_variant	time_rem	0.0157	-13.9	0.825	1020
LRRlongB37_genes.txt	16	78206954	WWOX	intron_variant,NMD_transcript_variant;intron_variant;intron_variant,non_coding_transcript_variant	time_rem_censor	0.0157	-0.297	0.39	1020
LRRlongB37_genes.txt	16	78206954	WWOX	intron_variant,NMD_transcript_variant;intron_variant;intron_variant,non_coding_transcript_variant	time_to_sez_censor	0.0157	-0.602	0.0937	1020
LRRlongB37_genes.txt	16	78210351	WWOX	intron_variant,NMD_transcript_variant;intron_variant;intron_variant,non_coding_transcript_variant	rem1	-0.0391	-0.104	0.5	1020
LRRlongB37_genes.txt	16	78210351	WWOX	intron_variant,NMD_transcript_variant;intron_variant;intron_variant,non_coding_transcript_variant	rem_12m	-0.0391	0.575	8.82e-05	1020
LRRlongB37_genes.txt	16	78210351	WWOX	intron_variant,NMD_transcript_variant;intron_variant;intron_variant,non_coding_transcript_variant	time_first_sez	-0.0391	-75.1	0.0429	1020
LRRlongB37_genes.txt	16	78210351	WWOX	intron_variant,NMD_transcript_variant;intron_variant;intron_variant,non_coding_transcript_variant	time_rem	-0.0391	93.1	0.00115	1020
LRRlongB37_genes.txt	16	78210351	WWOX	intron_variant,NMD_transcript_variant;intron_variant;intron_variant,non_coding_transcript_variant	time_rem_censor	-0.0391	-0.104	0.5	1020
LRRlongB37_genes.txt	16	78210351	WWOX	intron_variant,NMD_transcript_variant;intron_variant;intron_variant,non_coding_transcript_variant	time_to_sez_censor	-0.0391	0.769	2.28e-07	1020
LRRlongB37_genes.txt	16	78211766	WWOX	intron_variant,NMD_transcript_variant;intron_variant;intron_variant,non_coding_transcript_variant	rem1	-0.138	-0.0324	0.666	1020
LRRlongB37_genes.txt	16	78211766	WWOX	intron_variant,NMD_transcript_variant;intron_variant;intron_variant,non_coding_transcript_variant	rem_12m	-0.138	0.413	1.11e-08	1020
LRRlongB37_genes.txt	16	78211766	WWOX	intron_variant,NMD_transcript_variant;intron_variant;intron_variant,non_coding_transcript_variant	time_first_sez	-0.138	-54.2	0.00298	1020
LRRlongB37_genes.txt	16	78211766	WWOX	intron_variant,NMD_transcript_variant;intron_variant;intron_variant,non_coding_transcript_variant	time_rem	-0.138	85	1.28e-09	1020
LRRlongB37_genes.txt	16	78211766	WWOX	intron_variant,NMD_transcript_variant;intron_variant;intron_variant,non_coding_transcript_variant	time_rem_censor	-0.138	-0.0324	0.666	1020
LRRlongB37_genes.txt	16	78211766	WWOX	intron_variant,NMD_transcript_variant;intron_variant;intron_variant,non_coding_transcript_variant	time_to_sez_censor	-0.138	0.515	1.45e-12	1020
LRRlongB37_genes.txt	16	78213755	WWOX	intron_variant,NMD_transcript_variant;intron_variant;intron_variant,non_coding_transcript_variant	rem1	-0.0635	-0.0281	0.819	1020
LRRlongB37_genes.txt	16	78213755	WWOX	intron_variant,NMD_transcript_variant;intron_variant;intron_variant,non_coding_transcript_variant	rem_12m	-0.0635	0.56	2.4e-06	1020
LRRlongB37_genes.txt	16	78213755	WWOX	intron_variant,NMD_transcript_variant;intron_variant;intron_variant,non_coding_transcript_variant	time_first_sez	-0.0635	-75.9	0.0111	1020
LRRlongB37_genes.txt	16	78213755	WWOX	intron_variant,NMD_transcript_variant;intron_variant;intron_variant,non_coding_transcript_variant	time_rem	-0.0635	105	4.94e-06	1020
LRRlongB37_genes.txt	16	78213755	WWOX	intron_variant,NMD_transcript_variant;intron_variant;intron_variant,non_coding_transcript_variant	time_rem_censor	-0.0635	-0.0281	0.819	1020
LRRlongB37_genes.txt	16	78213755	WWOX	intron_variant,NMD_transcript_variant;intron_variant;intron_variant,non_coding_transcript_variant	time_to_sez_censor	-0.0635	0.716	2.02e-09	1020
LRRlongB37_genes.txt	16	78214952	WWOX	intron_variant,NMD_transcript_variant;intron_variant;intron_variant,non_coding_transcript_variant	rem1	0.00747	0.239	0.501	1020
LRRlongB37_genes.txt	16	78214952	WWOX	intron_variant,NMD_transcript_variant;intron_variant;intron_variant,non_coding_transcript_variant	rem_12m	0.00747	0.148	0.661	1020
LRRlongB37_genes.txt	16	78214952	WWOX	intron_variant,NMD_transcript_variant;intron_variant;intron_variant,non_coding_transcript_variant	time_first_sez	0.00747	-31.5	0.719	1020
LRRlongB37_genes.txt	16	78214952	WWOX	intron_variant,NMD_transcript_variant;intron_variant;intron_variant,non_coding_transcript_variant	time_rem	0.00747	12.5	0.853	1020
LRRlongB37_genes.txt	16	78214952	WWOX	intron_variant,NMD_transcript_variant;intron_variant;intron_variant,non_coding_transcript_variant	time_rem_censor	0.00747	0.239	0.501	1020
LRRlongB37_genes.txt	16	78214952	WWOX	intron_variant,NMD_transcript_variant;intron_variant;intron_variant,non_coding_transcript_variant	time_to_sez_censor	0.00747	0.413	0.23	1020
LRRlongB37_genes.txt	16	78215909	WWOX	intron_variant,NMD_transcript_variant;intron_variant;intron_variant,non_coding_transcript_variant	rem1	0.0187	-0.148	0.792	1020
LRRlongB37_genes.txt	16	78215909	WWOX	intron_variant,NMD_transcript_variant;intron_variant;intron_variant,non_coding_transcript_variant	rem_12m	0.0187	-1.56	0.00366	1020
LRRlongB37_genes.txt	16	78215909	WWOX	intron_variant,NMD_transcript_variant;intron_variant;intron_variant,non_coding_transcript_variant	time_first_sez	0.0187	187	0.176	1020
LRRlongB37_genes.txt	16	78215909	WWOX	intron_variant,NMD_transcript_variant;intron_variant;intron_variant,non_coding_transcript_variant	time_rem	0.0187	-382	0.000325	1020
LRRlongB37_genes.txt	16	78215909	WWOX	intron_variant,NMD_transcript_variant;intron_variant;intron_variant,non_coding_transcript_variant	time_rem_censor	0.0187	-0.148	0.792	1020
LRRlongB37_genes.txt	16	78215909	WWOX	intron_variant,NMD_transcript_variant;intron_variant;intron_variant,non_coding_transcript_variant	time_to_sez_censor	0.0187	-2.05	0.000215	1020
LRRlongB37_genes.txt	16	78216167	WWOX	intron_variant,NMD_transcript_variant;intron_variant;intron_variant,non_coding_transcript_variant	rem1	-0.0812	-0.0423	0.669	1020
LRRlongB37_genes.txt	16	78216167	WWOX	intron_variant,NMD_transcript_variant;intron_variant;intron_variant,non_coding_transcript_variant	rem_12m	-0.0812	0.541	1.44e-08	1020
LRRlongB37_genes.txt	16	78216167	WWOX	intron_variant,NMD_transcript_variant;intron_variant;intron_variant,non_coding_transcript_variant	time_first_sez	-0.0812	-73.5	0.00229	1020
LRRlongB37_genes.txt	16	78216167	WWOX	intron_variant,NMD_transcript_variant;intron_variant;intron_variant,non_coding_transcript_variant	time_rem	-0.0812	111	2.31e-09	1020
LRRlongB37_genes.txt	16	78216167	WWOX	intron_variant,NMD_transcript_variant;intron_variant;intron_variant,non_coding_transcript_variant	time_rem_censor	-0.0812	-0.0423	0.669	1020
LRRlongB37_genes.txt	16	78216167	WWOX	intron_variant,NMD_transcript_variant;intron_variant;intron_variant,non_coding_transcript_variant	time_to_sez_censor	-0.0812	0.672	2.76e-12	1020
LRRlongB37_genes.txt	16	78221718	WWOX	intron_variant,NMD_transcript_variant;intron_variant;intron_variant,non_coding_transcript_variant	rem1	0.00222	0.26	0.485	1020
LRRlongB37_genes.txt	16	78221718	WWOX	intron_variant,NMD_transcript_variant;intron_variant;intron_variant,non_coding_transcript_variant	rem_12m	0.00222	-0.904	0.0186	1020
LRRlongB37_genes.txt	16	78221718	WWOX	intron_variant,NMD_transcript_variant;intron_variant;intron_variant,non_coding_transcript_variant	time_first_sez	0.00222	126	0.175	1020
LRRlongB37_genes.txt	16	78221718	WWOX	intron_variant,NMD_transcript_variant;intron_variant;intron_variant,non_coding_transcript_variant	time_rem	0.00222	-132	0.064	1020
LRRlongB37_genes.txt	16	78221718	WWOX	intron_variant,NMD_transcript_variant;intron_variant;intron_variant,non_coding_transcript_variant	time_rem_censor	0.00222	0.26	0.485	1020
LRRlongB37_genes.txt	16	78221718	WWOX	intron_variant,NMD_transcript_variant;intron_variant;intron_variant,non_coding_transcript_variant	time_to_sez_censor	0.00222	-1.24	0.00255	1020
LRRlongB37_genes.txt	16	78222527	WWOX	intron_variant,NMD_transcript_variant;intron_variant;intron_variant,non_coding_transcript_variant	rem1	0.00279	0.184	0.639	1020
LRRlongB37_genes.txt	16	78222527	WWOX	intron_variant,NMD_transcript_variant;intron_variant;intron_variant,non_coding_transcript_variant	rem_12m	0.00279	-2.1	2.4e-08	1020
LRRlongB37_genes.txt	16	78222527	WWOX	intron_variant,NMD_transcript_variant;intron_variant;intron_variant,non_coding_transcript_variant	time_first_sez	0.00279	335	0.000487	1020
LRRlongB37_genes.txt	16	78222527	WWOX	intron_variant,NMD_transcript_variant;intron_variant;intron_variant,non_coding_transcript_variant	time_rem	0.00279	-474	1.32e-10	1020
LRRlongB37_genes.txt	16	78222527	WWOX	intron_variant,NMD_transcript_variant;intron_variant;intron_variant,non_coding_transcript_variant	time_rem_censor	0.00279	0.184	0.639	1020
LRRlongB37_genes.txt	16	78222527	WWOX	intron_variant,NMD_transcript_variant;intron_variant;intron_variant,non_coding_transcript_variant	time_to_sez_censor	0.00279	-2.38	7.87e-10	1020
LRRlongB37_genes.txt	16	78222989	WWOX	intron_variant,NMD_transcript_variant;intron_variant;intron_variant,non_coding_transcript_variant	rem1	0.0264	0.283	0.494	1020
LRRlongB37_genes.txt	16	78222989	WWOX	intron_variant,NMD_transcript_variant;intron_variant;intron_variant,non_coding_transcript_variant	rem_12m	0.0264	-2.25	1.87e-08	1020
LRRlongB37_genes.txt	16	78222989	WWOX	intron_variant,NMD_transcript_variant;intron_variant;intron_variant,non_coding_transcript_variant	time_first_sez	0.0264	333	0.000998	1020
LRRlongB37_genes.txt	16	78222989	WWOX	intron_variant,NMD_transcript_variant;intron_variant;intron_variant,non_coding_transcript_variant	time_rem	0.0264	-333	1.98e-05	1020
LRRlongB37_genes.txt	16	78222989	WWOX	intron_variant,NMD_transcript_variant;intron_variant;intron_variant,non_coding_transcript_variant	time_rem_censor	0.0264	0.283	0.494	1020
LRRlongB37_genes.txt	16	78222989	WWOX	intron_variant,NMD_transcript_variant;intron_variant;intron_variant,non_coding_transcript_variant	time_to_sez_censor	0.0264	-2.73	2.89e-11	1020
LRRlongB37_genes.txt	16	78224186	WWOX	intron_variant,NMD_transcript_variant;intron_variant;intron_variant,non_coding_transcript_variant	rem1	-0.0221	-0.0584	0.763	1020
LRRlongB37_genes.txt	16	78224186	WWOX	intron_variant,NMD_transcript_variant;intron_variant;intron_variant,non_coding_transcript_variant	rem_12m	-0.0221	0.499	0.00631	1020
LRRlongB37_genes.txt	16	78224186	WWOX	intron_variant,NMD_transcript_variant;intron_variant;intron_variant,non_coding_transcript_variant	time_first_sez	-0.0221	-65.1	0.169	1020
LRRlongB37_genes.txt	16	78224186	WWOX	intron_variant,NMD_transcript_variant;intron_variant;intron_variant,non_coding_transcript_variant	time_rem	-0.0221	90.2	0.0136	1020
LRRlongB37_genes.txt	16	78224186	WWOX	intron_variant,NMD_transcript_variant;intron_variant;intron_variant,non_coding_transcript_variant	time_rem_censor	-0.0221	-0.0584	0.763	1020
LRRlongB37_genes.txt	16	78224186	WWOX	intron_variant,NMD_transcript_variant;intron_variant;intron_variant,non_coding_transcript_variant	time_to_sez_censor	-0.0221	0.738	6.27e-05	1020
LRRlongB37_genes.txt	16	78232385	WWOX	intron_variant,NMD_transcript_variant;intron_variant;intron_variant,non_coding_transcript_variant	rem1	0.0489	0.21	0.282	1020
LRRlongB37_genes.txt	16	78232385	WWOX	intron_variant,NMD_transcript_variant;intron_variant;intron_variant,non_coding_transcript_variant	rem_12m	0.0489	-1.14	1.56e-09	1020
LRRlongB37_genes.txt	16	78232385	WWOX	intron_variant,NMD_transcript_variant;intron_variant;intron_variant,non_coding_transcript_variant	time_first_sez	0.0489	166	0.000401	1020
LRRlongB37_genes.txt	16	78232385	WWOX	intron_variant,NMD_transcript_variant;intron_variant;intron_variant,non_coding_transcript_variant	time_rem	0.0489	-212	3.44e-09	1020
LRRlongB37_genes.txt	16	78232385	WWOX	intron_variant,NMD_transcript_variant;intron_variant;intron_variant,non_coding_transcript_variant	time_rem_censor	0.0489	0.21	0.282	1020
LRRlongB37_genes.txt	16	78232385	WWOX	intron_variant,NMD_transcript_variant;intron_variant;intron_variant,non_coding_transcript_variant	time_to_sez_censor	0.0489	-1.38	2.9e-13	1020
LRRlongB37_genes.txt	16	78236048	WWOX	intron_variant,NMD_transcript_variant;intron_variant;intron_variant,non_coding_transcript_variant	rem1	-0.0631	-0.129	0.324	1020
LRRlongB37_genes.txt	16	78236048	WWOX	intron_variant,NMD_transcript_variant;intron_variant;intron_variant,non_coding_transcript_variant	rem_12m	-0.0631	0.526	2.23e-05	1020
LRRlongB37_genes.txt	16	78236048	WWOX	intron_variant,NMD_transcript_variant;intron_variant;intron_variant,non_coding_transcript_variant	time_first_sez	-0.0631	-70.3	0.0244	1020
LRRlongB37_genes.txt	16	78236048	WWOX	intron_variant,NMD_transcript_variant;intron_variant;intron_variant,non_coding_transcript_variant	time_rem	-0.0631	101	2.65e-05	1020
LRRlongB37_genes.txt	16	78236048	WWOX	intron_variant,NMD_transcript_variant;intron_variant;intron_variant,non_coding_transcript_variant	time_rem_censor	-0.0631	-0.129	0.324	1020
LRRlongB37_genes.txt	16	78236048	WWOX	intron_variant,NMD_transcript_variant;intron_variant;intron_variant,non_coding_transcript_variant	time_to_sez_censor	-0.0631	0.671	8.3e-08	1020
LRRlongB37_genes.txt	16	78243384	WWOX	intron_variant,NMD_transcript_variant;intron_variant;intron_variant,non_coding_transcript_variant	rem1	-0.0522	-0.116	0.266	1020
LRRlongB37_genes.txt	16	78243384	WWOX	intron_variant,NMD_transcript_variant;intron_variant;intron_variant,non_coding_transcript_variant	rem_12m	-0.0522	0.451	5.2e-06	1020
LRRlongB37_genes.txt	16	78243384	WWOX	intron_variant,NMD_transcript_variant;intron_variant;intron_variant,non_coding_transcript_variant	time_first_sez	-0.0522	-66.9	0.00695	1020
LRRlongB37_genes.txt	16	78243384	WWOX	intron_variant,NMD_transcript_variant;intron_variant;intron_variant,non_coding_transcript_variant	time_rem	-0.0522	73.6	0.000118	1020
LRRlongB37_genes.txt	16	78243384	WWOX	intron_variant,NMD_transcript_variant;intron_variant;intron_variant,non_coding_transcript_variant	time_rem_censor	-0.0522	-0.116	0.266	1020
LRRlongB37_genes.txt	16	78243384	WWOX	intron_variant,NMD_transcript_variant;intron_variant;intron_variant,non_coding_transcript_variant	time_to_sez_censor	-0.0522	0.579	5.94e-09	1020
LRRlongB37_genes.txt	16	78250055	WWOX	intron_variant,NMD_transcript_variant;intron_variant;intron_variant,non_coding_transcript_variant	rem1	0.00133	-0.202	0.465	1020
LRRlongB37_genes.txt	16	78250055	WWOX	intron_variant,NMD_transcript_variant;intron_variant;intron_variant,non_coding_transcript_variant	rem_12m	0.00133	-0.0482	0.851	1020
LRRlongB37_genes.txt	16	78250055	WWOX	intron_variant,NMD_transcript_variant;intron_variant;intron_variant,non_coding_transcript_variant	time_first_sez	0.00133	50.9	0.443	1020
LRRlongB37_genes.txt	16	78250055	WWOX	intron_variant,NMD_transcript_variant;intron_variant;intron_variant,non_coding_transcript_variant	time_rem	0.00133	-105	0.0404	1020
LRRlongB37_genes.txt	16	78250055	WWOX	intron_variant,NMD_transcript_variant;intron_variant;intron_variant,non_coding_transcript_variant	time_rem_censor	0.00133	-0.202	0.465	1020
LRRlongB37_genes.txt	16	78250055	WWOX	intron_variant,NMD_transcript_variant;intron_variant;intron_variant,non_coding_transcript_variant	time_to_sez_censor	0.00133	-0.116	0.663	1020
LRRlongB37_genes.txt	16	78251616	WWOX	intron_variant,NMD_transcript_variant;intron_variant;intron_variant,non_coding_transcript_variant	rem1	0.0172	-0.155	0.549	1020
LRRlongB37_genes.txt	16	78251616	WWOX	intron_variant,NMD_transcript_variant;intron_variant;intron_variant,non_coding_transcript_variant	rem_12m	0.0172	-0.352	0.181	1020
LRRlongB37_genes.txt	16	78251616	WWOX	intron_variant,NMD_transcript_variant;intron_variant;intron_variant,non_coding_transcript_variant	time_first_sez	0.0172	39.8	0.511	1020
LRRlongB37_genes.txt	16	78251616	WWOX	intron_variant,NMD_transcript_variant;intron_variant;intron_variant,non_coding_transcript_variant	time_rem	0.0172	-84.4	0.0718	1020
LRRlongB37_genes.txt	16	78251616	WWOX	intron_variant,NMD_transcript_variant;intron_variant;intron_variant,non_coding_transcript_variant	time_rem_censor	0.0172	-0.155	0.549	1020
LRRlongB37_genes.txt	16	78251616	WWOX	intron_variant,NMD_transcript_variant;intron_variant;intron_variant,non_coding_transcript_variant	time_to_sez_censor	0.0172	-0.283	0.293	1020
LRRlongB37_genes.txt	16	78254732	WWOX	intron_variant,NMD_transcript_variant;intron_variant;intron_variant,non_coding_transcript_variant	rem1	-0.00813	-0.106	0.743	1020
LRRlongB37_genes.txt	16	78254732	WWOX	intron_variant,NMD_transcript_variant;intron_variant;intron_variant,non_coding_transcript_variant	rem_12m	-0.00813	-1.25	0.000112	1020
LRRlongB37_genes.txt	16	78254732	WWOX	intron_variant,NMD_transcript_variant;intron_variant;intron_variant,non_coding_transcript_variant	time_first_sez	-0.00813	155	0.0516	1020
LRRlongB37_genes.txt	16	78254732	WWOX	intron_variant,NMD_transcript_variant;intron_variant;intron_variant,non_coding_transcript_variant	time_rem	-0.00813	-302	8.31e-07	1020
LRRlongB37_genes.txt	16	78254732	WWOX	intron_variant,NMD_transcript_variant;intron_variant;intron_variant,non_coding_transcript_variant	time_rem_censor	-0.00813	-0.106	0.743	1020
LRRlongB37_genes.txt	16	78254732	WWOX	intron_variant,NMD_transcript_variant;intron_variant;intron_variant,non_coding_transcript_variant	time_to_sez_censor	-0.00813	-1.4	2.7e-05	1020
LRRlongB37_genes.txt	16	78257808	WWOX	intron_variant,NMD_transcript_variant;intron_variant;intron_variant,non_coding_transcript_variant	rem1	-0.041	-0.00959	0.946	1020
LRRlongB37_genes.txt	16	78257808	WWOX	intron_variant,NMD_transcript_variant;intron_variant;intron_variant,non_coding_transcript_variant	rem_12m	-0.041	0.555	4.61e-05	1020
LRRlongB37_genes.txt	16	78257808	WWOX	intron_variant,NMD_transcript_variant;intron_variant;intron_variant,non_coding_transcript_variant	time_first_sez	-0.041	-67.8	0.0526	1020
LRRlongB37_genes.txt	16	78257808	WWOX	intron_variant,NMD_transcript_variant;intron_variant;intron_variant,non_coding_transcript_variant	time_rem	-0.041	110	4.65e-05	1020
LRRlongB37_genes.txt	16	78257808	WWOX	intron_variant,NMD_transcript_variant;intron_variant;intron_variant,non_coding_transcript_variant	time_rem_censor	-0.041	-0.00959	0.946	1020
LRRlongB37_genes.txt	16	78257808	WWOX	intron_variant,NMD_transcript_variant;intron_variant;intron_variant,non_coding_transcript_variant	time_to_sez_censor	-0.041	0.724	1.28e-07	1020
LRRlongB37_genes.txt	16	78264680	WWOX	intron_variant,NMD_transcript_variant;intron_variant;intron_variant,non_coding_transcript_variant	rem1	0.0401	0.193	0.431	1020
LRRlongB37_genes.txt	16	78264680	WWOX	intron_variant,NMD_transcript_variant;intron_variant;intron_variant,non_coding_transcript_variant	rem_12m	0.0401	-1.37	9.97e-09	1020
LRRlongB37_genes.txt	16	78264680	WWOX	intron_variant,NMD_transcript_variant;intron_variant;intron_variant,non_coding_transcript_variant	time_first_sez	0.0401	185	0.00174	1020
LRRlongB37_genes.txt	16	78264680	WWOX	intron_variant,NMD_transcript_variant;intron_variant;intron_variant,non_coding_transcript_variant	time_rem	0.0401	-275	1.39e-09	1020
LRRlongB37_genes.txt	16	78264680	WWOX	intron_variant,NMD_transcript_variant;intron_variant;intron_variant,non_coding_transcript_variant	time_rem_censor	0.0401	0.193	0.431	1020
LRRlongB37_genes.txt	16	78264680	WWOX	intron_variant,NMD_transcript_variant;intron_variant;intron_variant,non_coding_transcript_variant	time_to_sez_censor	0.0401	-1.7	2.05e-12	1020
LRRlongB37_genes.txt	16	78265423	WWOX	intron_variant,NMD_transcript_variant;intron_variant;intron_variant,non_coding_transcript_variant	rem1	0.0315	0.0695	0.713	1020
LRRlongB37_genes.txt	16	78265423	WWOX	intron_variant,NMD_transcript_variant;intron_variant;intron_variant,non_coding_transcript_variant	rem_12m	0.0315	-0.736	4.84e-05	1020
LRRlongB37_genes.txt	16	78265423	WWOX	intron_variant,NMD_transcript_variant;intron_variant;intron_variant,non_coding_transcript_variant	time_first_sez	0.0315	104	0.024	1020
LRRlongB37_genes.txt	16	78265423	WWOX	intron_variant,NMD_transcript_variant;intron_variant;intron_variant,non_coding_transcript_variant	time_rem	0.0315	-140	8.72e-05	1020
LRRlongB37_genes.txt	16	78265423	WWOX	intron_variant,NMD_transcript_variant;intron_variant;intron_variant,non_coding_transcript_variant	time_rem_censor	0.0315	0.0695	0.713	1020
LRRlongB37_genes.txt	16	78265423	WWOX	intron_variant,NMD_transcript_variant;intron_variant;intron_variant,non_coding_transcript_variant	time_to_sez_censor	0.0315	-0.977	9.72e-08	1020
LRRlongB37_genes.txt	16	78270078	WWOX;RP11-190D6.2	intron_variant,NMD_transcript_variant;intron_variant;intron_variant,non_coding_transcript_variant;downstream_gene_variant	rem1	-0.0402	-0.0353	0.825	1020
LRRlongB37_genes.txt	16	78270078	WWOX;RP11-190D6.2	intron_variant,NMD_transcript_variant;intron_variant;intron_variant,non_coding_transcript_variant;downstream_gene_variant	rem_12m	-0.0402	0.334	0.0254	1020
LRRlongB37_genes.txt	16	78270078	WWOX;RP11-190D6.2	intron_variant,NMD_transcript_variant;intron_variant;intron_variant,non_coding_transcript_variant;downstream_gene_variant	time_first_sez	-0.0402	-33	0.396	1020
LRRlongB37_genes.txt	16	78270078	WWOX;RP11-190D6.2	intron_variant,NMD_transcript_variant;intron_variant;intron_variant,non_coding_transcript_variant;downstream_gene_variant	time_rem	-0.0402	70.5	0.0191	1020
LRRlongB37_genes.txt	16	78270078	WWOX;RP11-190D6.2	intron_variant,NMD_transcript_variant;intron_variant;intron_variant,non_coding_transcript_variant;downstream_gene_variant	time_rem_censor	-0.0402	-0.0353	0.825	1020
LRRlongB37_genes.txt	16	78270078	WWOX;RP11-190D6.2	intron_variant,NMD_transcript_variant;intron_variant;intron_variant,non_coding_transcript_variant;downstream_gene_variant	time_to_sez_censor	-0.0402	0.517	0.000601	1020
LRRlongB37_genes.txt	16	78271066	WWOX;RP11-190D6.2	intron_variant,NMD_transcript_variant;intron_variant;intron_variant,non_coding_transcript_variant;downstream_gene_variant	rem1	-0.0821	-0.0253	0.806	1010
LRRlongB37_genes.txt	16	78271066	WWOX;RP11-190D6.2	intron_variant,NMD_transcript_variant;intron_variant;intron_variant,non_coding_transcript_variant;downstream_gene_variant	rem_12m	-0.0821	0.469	2.38e-06	1010
LRRlongB37_genes.txt	16	78271066	WWOX;RP11-190D6.2	intron_variant,NMD_transcript_variant;intron_variant;intron_variant,non_coding_transcript_variant;downstream_gene_variant	time_first_sez	-0.0821	-60.3	0.0163	1010
LRRlongB37_genes.txt	16	78271066	WWOX;RP11-190D6.2	intron_variant,NMD_transcript_variant;intron_variant;intron_variant,non_coding_transcript_variant;downstream_gene_variant	time_rem	-0.0821	95.1	9.25e-07	1010
LRRlongB37_genes.txt	16	78271066	WWOX;RP11-190D6.2	intron_variant,NMD_transcript_variant;intron_variant;intron_variant,non_coding_transcript_variant;downstream_gene_variant	time_rem_censor	-0.0821	-0.0253	0.806	1010
LRRlongB37_genes.txt	16	78271066	WWOX;RP11-190D6.2	intron_variant,NMD_transcript_variant;intron_variant;intron_variant,non_coding_transcript_variant;downstream_gene_variant	time_to_sez_censor	-0.0821	0.607	1.24e-09	1010
LRRlongB37_genes.txt	16	78273279	WWOX;RP11-190D6.2	intron_variant,NMD_transcript_variant;intron_variant;intron_variant,non_coding_transcript_variant	rem1	0.0202	0.671	0.115	1020
LRRlongB37_genes.txt	16	78273279	WWOX;RP11-190D6.2	intron_variant,NMD_transcript_variant;intron_variant;intron_variant,non_coding_transcript_variant	rem_12m	0.0202	-2.32	2.99e-08	1020
LRRlongB37_genes.txt	16	78273279	WWOX;RP11-190D6.2	intron_variant,NMD_transcript_variant;intron_variant;intron_variant,non_coding_transcript_variant	time_first_sez	0.0202	382	0.000239	1020
LRRlongB37_genes.txt	16	78273279	WWOX;RP11-190D6.2	intron_variant,NMD_transcript_variant;intron_variant;intron_variant,non_coding_transcript_variant	time_rem	0.0202	-294	0.000253	1020
LRRlongB37_genes.txt	16	78273279	WWOX;RP11-190D6.2	intron_variant,NMD_transcript_variant;intron_variant;intron_variant,non_coding_transcript_variant	time_rem_censor	0.0202	0.671	0.115	1020
LRRlongB37_genes.txt	16	78273279	WWOX;RP11-190D6.2	intron_variant,NMD_transcript_variant;intron_variant;intron_variant,non_coding_transcript_variant	time_to_sez_censor	0.0202	-2.59	2.01e-09	1020
LRRlongB37_genes.txt	16	78280176	WWOX	intron_variant,NMD_transcript_variant;intron_variant;intron_variant,non_coding_transcript_variant	rem1	-0.0165	-0.101	0.503	1020
LRRlongB37_genes.txt	16	78280176	WWOX	intron_variant,NMD_transcript_variant;intron_variant;intron_variant,non_coding_transcript_variant	rem_12m	-0.0165	0.451	0.00139	1020
LRRlongB37_genes.txt	16	78280176	WWOX	intron_variant,NMD_transcript_variant;intron_variant;intron_variant,non_coding_transcript_variant	time_first_sez	-0.0165	-63.1	0.0847	1020
LRRlongB37_genes.txt	16	78280176	WWOX	intron_variant,NMD_transcript_variant;intron_variant;intron_variant,non_coding_transcript_variant	time_rem	-0.0165	66.5	0.0186	1020
LRRlongB37_genes.txt	16	78280176	WWOX	intron_variant,NMD_transcript_variant;intron_variant;intron_variant,non_coding_transcript_variant	time_rem_censor	-0.0165	-0.101	0.503	1020
LRRlongB37_genes.txt	16	78280176	WWOX	intron_variant,NMD_transcript_variant;intron_variant;intron_variant,non_coding_transcript_variant	time_to_sez_censor	-0.0165	0.629	9.53e-06	1020
LRRlongB37_genes.txt	16	78282287	WWOX	intron_variant,NMD_transcript_variant;intron_variant;intron_variant,non_coding_transcript_variant	rem1	-0.0733	-0.122	0.313	1020
LRRlongB37_genes.txt	16	78282287	WWOX	intron_variant,NMD_transcript_variant;intron_variant;intron_variant,non_coding_transcript_variant	rem_12m	-0.0733	0.789	2.59e-11	1020
LRRlongB37_genes.txt	16	78282287	WWOX	intron_variant,NMD_transcript_variant;intron_variant;intron_variant,non_coding_transcript_variant	time_first_sez	-0.0733	-116	6.22e-05	1020
LRRlongB37_genes.txt	16	78282287	WWOX	intron_variant,NMD_transcript_variant;intron_variant;intron_variant,non_coding_transcript_variant	time_rem	-0.0733	147	4.08e-11	1020
LRRlongB37_genes.txt	16	78282287	WWOX	intron_variant,NMD_transcript_variant;intron_variant;intron_variant,non_coding_transcript_variant	time_rem_censor	-0.0733	-0.122	0.313	1020
LRRlongB37_genes.txt	16	78282287	WWOX	intron_variant,NMD_transcript_variant;intron_variant;intron_variant,non_coding_transcript_variant	time_to_sez_censor	-0.0733	0.949	1.72e-15	1020
LRRlongB37_genes.txt	16	78283761	WWOX	intron_variant,NMD_transcript_variant;intron_variant;intron_variant,non_coding_transcript_variant	rem1	-0.00901	0.0827	0.692	1020
LRRlongB37_genes.txt	16	78283761	WWOX	intron_variant,NMD_transcript_variant;intron_variant;intron_variant,non_coding_transcript_variant	rem_12m	-0.00901	0.266	0.181	1020
LRRlongB37_genes.txt	16	78283761	WWOX	intron_variant,NMD_transcript_variant;intron_variant;intron_variant,non_coding_transcript_variant	time_first_sez	-0.00901	-9.24	0.859	1020
LRRlongB37_genes.txt	16	78283761	WWOX	intron_variant,NMD_transcript_variant;intron_variant;intron_variant,non_coding_transcript_variant	time_rem	-0.00901	43.8	0.274	1020
LRRlongB37_genes.txt	16	78283761	WWOX	intron_variant,NMD_transcript_variant;intron_variant;intron_variant,non_coding_transcript_variant	time_rem_censor	-0.00901	0.0827	0.692	1020
LRRlongB37_genes.txt	16	78283761	WWOX	intron_variant,NMD_transcript_variant;intron_variant;intron_variant,non_coding_transcript_variant	time_to_sez_censor	-0.00901	0.487	0.0154	1020
LRRlongB37_genes.txt	16	78291853	WWOX	intron_variant,NMD_transcript_variant;intron_variant;intron_variant,non_coding_transcript_variant	rem1	-0.106	-0.05	0.682	1020
LRRlongB37_genes.txt	16	78291853	WWOX	intron_variant,NMD_transcript_variant;intron_variant;intron_variant,non_coding_transcript_variant	rem_12m	-0.106	0.53	5.12e-06	1020
LRRlongB37_genes.txt	16	78291853	WWOX	intron_variant,NMD_transcript_variant;intron_variant;intron_variant,non_coding_transcript_variant	time_first_sez	-0.106	-75	0.0116	1020
LRRlongB37_genes.txt	16	78291853	WWOX	intron_variant,NMD_transcript_variant;intron_variant;intron_variant,non_coding_transcript_variant	time_rem	-0.106	102	7.74e-06	1020
LRRlongB37_genes.txt	16	78291853	WWOX	intron_variant,NMD_transcript_variant;intron_variant;intron_variant,non_coding_transcript_variant	time_rem_censor	-0.106	-0.05	0.682	1020
LRRlongB37_genes.txt	16	78291853	WWOX	intron_variant,NMD_transcript_variant;intron_variant;intron_variant,non_coding_transcript_variant	time_to_sez_censor	-0.106	0.719	1.03e-09	1020
LRRlongB37_genes.txt	16	78295798	WWOX	intron_variant,NMD_transcript_variant;intron_variant;intron_variant,non_coding_transcript_variant	rem1	-0.0932	-0.00433	0.969	1020
LRRlongB37_genes.txt	16	78295798	WWOX	intron_variant,NMD_transcript_variant;intron_variant;intron_variant,non_coding_transcript_variant	rem_12m	-0.0932	0.371	0.00055	1020
LRRlongB37_genes.txt	16	78295798	WWOX	intron_variant,NMD_transcript_variant;intron_variant;intron_variant,non_coding_transcript_variant	time_first_sez	-0.0932	-63	0.0211	1020
LRRlongB37_genes.txt	16	78295798	WWOX	intron_variant,NMD_transcript_variant;intron_variant;intron_variant,non_coding_transcript_variant	time_rem	-0.0932	81.9	0.000101	1020
LRRlongB37_genes.txt	16	78295798	WWOX	intron_variant,NMD_transcript_variant;intron_variant;intron_variant,non_coding_transcript_variant	time_rem_censor	-0.0932	-0.00433	0.969	1020
LRRlongB37_genes.txt	16	78295798	WWOX	intron_variant,NMD_transcript_variant;intron_variant;intron_variant,non_coding_transcript_variant	time_to_sez_censor	-0.0932	0.496	4.72e-06	1020
LRRlongB37_genes.txt	16	78303266	WWOX	intron_variant,NMD_transcript_variant;intron_variant;intron_variant,non_coding_transcript_variant	rem1	-0.0542	-0.0288	0.801	1020
LRRlongB37_genes.txt	16	78303266	WWOX	intron_variant,NMD_transcript_variant;intron_variant;intron_variant,non_coding_transcript_variant	rem_12m	-0.0542	0.422	0.000107	1020
LRRlongB37_genes.txt	16	78303266	WWOX	intron_variant,NMD_transcript_variant;intron_variant;intron_variant,non_coding_transcript_variant	time_first_sez	-0.0542	-46.5	0.096	1020
LRRlongB37_genes.txt	16	78303266	WWOX	intron_variant,NMD_transcript_variant;intron_variant;intron_variant,non_coding_transcript_variant	time_rem	-0.0542	85.5	7.26e-05	1020
LRRlongB37_genes.txt	16	78303266	WWOX	intron_variant,NMD_transcript_variant;intron_variant;intron_variant,non_coding_transcript_variant	time_rem_censor	-0.0542	-0.0288	0.801	1020
LRRlongB37_genes.txt	16	78303266	WWOX	intron_variant,NMD_transcript_variant;intron_variant;intron_variant,non_coding_transcript_variant	time_to_sez_censor	-0.0542	0.558	3.24e-07	1020
LRRlongB37_genes.txt	16	78306219	WWOX	intron_variant,NMD_transcript_variant;intron_variant;intron_variant,non_coding_transcript_variant;downstream_gene_variant	rem1	0.00932	-0.234	0.608	1020
LRRlongB37_genes.txt	16	78306219	WWOX	intron_variant,NMD_transcript_variant;intron_variant;intron_variant,non_coding_transcript_variant;downstream_gene_variant	rem_12m	0.00932	0.0269	0.95	1020
LRRlongB37_genes.txt	16	78306219	WWOX	intron_variant,NMD_transcript_variant;intron_variant;intron_variant,non_coding_transcript_variant;downstream_gene_variant	time_first_sez	0.00932	59	0.597	1020
LRRlongB37_genes.txt	16	78306219	WWOX	intron_variant,NMD_transcript_variant;intron_variant;intron_variant,non_coding_transcript_variant;downstream_gene_variant	time_rem	0.00932	126	0.143	1020
LRRlongB37_genes.txt	16	78306219	WWOX	intron_variant,NMD_transcript_variant;intron_variant;intron_variant,non_coding_transcript_variant;downstream_gene_variant	time_rem_censor	0.00932	-0.234	0.608	1020
LRRlongB37_genes.txt	16	78306219	WWOX	intron_variant,NMD_transcript_variant;intron_variant;intron_variant,non_coding_transcript_variant;downstream_gene_variant	time_to_sez_censor	0.00932	0.106	0.81	1020
LRRlongB37_genes.txt	16	78308940	WWOX	intron_variant,NMD_transcript_variant;intron_variant;intron_variant,non_coding_transcript_variant;downstream_gene_variant	rem1	0.0408	0.0473	0.828	1020
LRRlongB37_genes.txt	16	78308940	WWOX	intron_variant,NMD_transcript_variant;intron_variant;intron_variant,non_coding_transcript_variant;downstream_gene_variant	rem_12m	0.0408	-1.2	1.13e-08	1020
LRRlongB37_genes.txt	16	78308940	WWOX	intron_variant,NMD_transcript_variant;intron_variant;intron_variant,non_coding_transcript_variant;downstream_gene_variant	time_first_sez	0.0408	164	0.00203	1020
LRRlongB37_genes.txt	16	78308940	WWOX	intron_variant,NMD_transcript_variant;intron_variant;intron_variant,non_coding_transcript_variant;downstream_gene_variant	time_rem	0.0408	-244	2.43e-09	1020
LRRlongB37_genes.txt	16	78308940	WWOX	intron_variant,NMD_transcript_variant;intron_variant;intron_variant,non_coding_transcript_variant;downstream_gene_variant	time_rem_censor	0.0408	0.0473	0.828	1020
LRRlongB37_genes.txt	16	78308940	WWOX	intron_variant,NMD_transcript_variant;intron_variant;intron_variant,non_coding_transcript_variant;downstream_gene_variant	time_to_sez_censor	0.0408	-1.5	1.79e-12	1020
LRRlongB37_genes.txt	16	78311773	WWOX	intron_variant,NMD_transcript_variant;intron_variant;intron_variant,non_coding_transcript_variant	rem1	-0.0582	-0.0116	0.933	1020
LRRlongB37_genes.txt	16	78311773	WWOX	intron_variant,NMD_transcript_variant;intron_variant;intron_variant,non_coding_transcript_variant	rem_12m	-0.0582	0.505	0.000136	1020
LRRlongB37_genes.txt	16	78311773	WWOX	intron_variant,NMD_transcript_variant;intron_variant;intron_variant,non_coding_transcript_variant	time_first_sez	-0.0582	-66.7	0.0485	1020
LRRlongB37_genes.txt	16	78311773	WWOX	intron_variant,NMD_transcript_variant;intron_variant;intron_variant,non_coding_transcript_variant	time_rem	-0.0582	85.9	0.000997	1020
LRRlongB37_genes.txt	16	78311773	WWOX	intron_variant,NMD_transcript_variant;intron_variant;intron_variant,non_coding_transcript_variant	time_rem_censor	-0.0582	-0.0116	0.933	1020
LRRlongB37_genes.txt	16	78311773	WWOX	intron_variant,NMD_transcript_variant;intron_variant;intron_variant,non_coding_transcript_variant	time_to_sez_censor	-0.0582	0.667	5.57e-07	1020
LRRlongB37_genes.txt	16	78316266	WWOX	intron_variant,NMD_transcript_variant;intron_variant;intron_variant,non_coding_transcript_variant;downstream_gene_variant	rem1	-0.149	-0.0404	0.575	1020
LRRlongB37_genes.txt	16	78316266	WWOX	intron_variant,NMD_transcript_variant;intron_variant;intron_variant,non_coding_transcript_variant;downstream_gene_variant	rem_12m	-0.149	0.419	1.81e-09	1020
LRRlongB37_genes.txt	16	78316266	WWOX	intron_variant,NMD_transcript_variant;intron_variant;intron_variant,non_coding_transcript_variant;downstream_gene_variant	time_first_sez	-0.149	-56.6	0.00117	1020
LRRlongB37_genes.txt	16	78316266	WWOX	intron_variant,NMD_transcript_variant;intron_variant;intron_variant,non_coding_transcript_variant;downstream_gene_variant	time_rem	-0.149	83.3	5.13e-10	1020
LRRlongB37_genes.txt	16	78316266	WWOX	intron_variant,NMD_transcript_variant;intron_variant;intron_variant,non_coding_transcript_variant;downstream_gene_variant	time_rem_censor	-0.149	-0.0404	0.575	1020
LRRlongB37_genes.txt	16	78316266	WWOX	intron_variant,NMD_transcript_variant;intron_variant;intron_variant,non_coding_transcript_variant;downstream_gene_variant	time_to_sez_censor	-0.149	0.52	1.21e-13	1020
LRRlongB37_genes.txt	16	78317465	WWOX	intron_variant,NMD_transcript_variant;intron_variant;intron_variant,non_coding_transcript_variant;downstream_gene_variant	rem1	-0.141	-0.0306	0.668	1020
LRRlongB37_genes.txt	16	78317465	WWOX	intron_variant,NMD_transcript_variant;intron_variant;intron_variant,non_coding_transcript_variant;downstream_gene_variant	rem_12m	-0.141	0.376	5.06e-08	1020
LRRlongB37_genes.txt	16	78317465	WWOX	intron_variant,NMD_transcript_variant;intron_variant;intron_variant,non_coding_transcript_variant;downstream_gene_variant	time_first_sez	-0.141	-51.1	0.0033	1020
LRRlongB37_genes.txt	16	78317465	WWOX	intron_variant,NMD_transcript_variant;intron_variant;intron_variant,non_coding_transcript_variant;downstream_gene_variant	time_rem	-0.141	73.7	3.54e-08	1020
LRRlongB37_genes.txt	16	78317465	WWOX	intron_variant,NMD_transcript_variant;intron_variant;intron_variant,non_coding_transcript_variant;downstream_gene_variant	time_rem_censor	-0.141	-0.0306	0.668	1020
LRRlongB37_genes.txt	16	78317465	WWOX	intron_variant,NMD_transcript_variant;intron_variant;intron_variant,non_coding_transcript_variant;downstream_gene_variant	time_to_sez_censor	-0.141	0.472	1e-11	1020
LRRlongB37_genes.txt	16	78319418	WWOX	intron_variant,NMD_transcript_variant;intron_variant;intron_variant,non_coding_transcript_variant;downstream_gene_variant	rem1	0.0113	0.0967	0.847	1020
LRRlongB37_genes.txt	16	78319418	WWOX	intron_variant,NMD_transcript_variant;intron_variant;intron_variant,non_coding_transcript_variant;downstream_gene_variant	rem_12m	0.0113	-1.35	0.00437	1020
LRRlongB37_genes.txt	16	78319418	WWOX	intron_variant,NMD_transcript_variant;intron_variant;intron_variant,non_coding_transcript_variant;downstream_gene_variant	time_first_sez	0.0113	243	0.0467	1020
LRRlongB37_genes.txt	16	78319418	WWOX	intron_variant,NMD_transcript_variant;intron_variant;intron_variant,non_coding_transcript_variant;downstream_gene_variant	time_rem	0.0113	-386	4.18e-05	1020
LRRlongB37_genes.txt	16	78319418	WWOX	intron_variant,NMD_transcript_variant;intron_variant;intron_variant,non_coding_transcript_variant;downstream_gene_variant	time_rem_censor	0.0113	0.0967	0.847	1020
LRRlongB37_genes.txt	16	78319418	WWOX	intron_variant,NMD_transcript_variant;intron_variant;intron_variant,non_coding_transcript_variant;downstream_gene_variant	time_to_sez_censor	0.0113	-1.78	0.000285	1020
LRRlongB37_genes.txt	16	78320653	WWOX	intron_variant,NMD_transcript_variant;intron_variant;intron_variant,non_coding_transcript_variant	rem1	-0.00109	-0.00143	0.996	1020
LRRlongB37_genes.txt	16	78320653	WWOX	intron_variant,NMD_transcript_variant;intron_variant;intron_variant,non_coding_transcript_variant	rem_12m	-0.00109	-1.14	0.000101	1020
LRRlongB37_genes.txt	16	78320653	WWOX	intron_variant,NMD_transcript_variant;intron_variant;intron_variant,non_coding_transcript_variant	time_first_sez	-0.00109	146	0.0436	1020
LRRlongB37_genes.txt	16	78320653	WWOX	intron_variant,NMD_transcript_variant;intron_variant;intron_variant,non_coding_transcript_variant	time_rem	-0.00109	-290	1.65e-07	1020
LRRlongB37_genes.txt	16	78320653	WWOX	intron_variant,NMD_transcript_variant;intron_variant;intron_variant,non_coding_transcript_variant	time_rem_censor	-0.00109	-0.00143	0.996	1020
LRRlongB37_genes.txt	16	78320653	WWOX	intron_variant,NMD_transcript_variant;intron_variant;intron_variant,non_coding_transcript_variant	time_to_sez_censor	-0.00109	-1.41	3.36e-06	1020
LRRlongB37_genes.txt	16	78324964	WWOX	intron_variant,NMD_transcript_variant;intron_variant;intron_variant,non_coding_transcript_variant	rem1	0.00888	-0.0063	0.988	1020
LRRlongB37_genes.txt	16	78324964	WWOX	intron_variant,NMD_transcript_variant;intron_variant;intron_variant,non_coding_transcript_variant	rem_12m	0.00888	-0.884	0.0429	1020
LRRlongB37_genes.txt	16	78324964	WWOX	intron_variant,NMD_transcript_variant;intron_variant;intron_variant,non_coding_transcript_variant	time_first_sez	0.00888	216	0.0418	1020
LRRlongB37_genes.txt	16	78324964	WWOX	intron_variant,NMD_transcript_variant;intron_variant;intron_variant,non_coding_transcript_variant	time_rem	0.00888	-126	0.124	1020
LRRlongB37_genes.txt	16	78324964	WWOX	intron_variant,NMD_transcript_variant;intron_variant;intron_variant,non_coding_transcript_variant	time_rem_censor	0.00888	-0.0063	0.988	1020
LRRlongB37_genes.txt	16	78324964	WWOX	intron_variant,NMD_transcript_variant;intron_variant;intron_variant,non_coding_transcript_variant	time_to_sez_censor	0.00888	-1.08	0.0182	1020
LRRlongB37_genes.txt	16	78326209	WWOX	intron_variant,NMD_transcript_variant;intron_variant;intron_variant,non_coding_transcript_variant	rem1	-0.155	-0.0508	0.513	1020
LRRlongB37_genes.txt	16	78326209	WWOX	intron_variant,NMD_transcript_variant;intron_variant;intron_variant,non_coding_transcript_variant	rem_12m	-0.155	0.488	7.79e-11	1020
LRRlongB37_genes.txt	16	78326209	WWOX	intron_variant,NMD_transcript_variant;intron_variant;intron_variant,non_coding_transcript_variant	time_first_sez	-0.155	-69.4	0.000229	1020
LRRlongB37_genes.txt	16	78326209	WWOX	intron_variant,NMD_transcript_variant;intron_variant;intron_variant,non_coding_transcript_variant	time_rem	-0.155	93.1	1.23e-10	1020
LRRlongB37_genes.txt	16	78326209	WWOX	intron_variant,NMD_transcript_variant;intron_variant;intron_variant,non_coding_transcript_variant	time_rem_censor	-0.155	-0.0508	0.513	1020
LRRlongB37_genes.txt	16	78326209	WWOX	intron_variant,NMD_transcript_variant;intron_variant;intron_variant,non_coding_transcript_variant	time_to_sez_censor	-0.155	0.598	2.91e-15	1020
LRRlongB37_genes.txt	16	78331559	WWOX	intron_variant,NMD_transcript_variant;intron_variant;intron_variant,non_coding_transcript_variant	rem1	0.00849	-0.251	0.484	1020
LRRlongB37_genes.txt	16	78331559	WWOX	intron_variant,NMD_transcript_variant;intron_variant;intron_variant,non_coding_transcript_variant	rem_12m	0.00849	0.249	0.46	1020
LRRlongB37_genes.txt	16	78331559	WWOX	intron_variant,NMD_transcript_variant;intron_variant;intron_variant,non_coding_transcript_variant	time_first_sez	0.00849	-74.1	0.398	1020
LRRlongB37_genes.txt	16	78331559	WWOX	intron_variant,NMD_transcript_variant;intron_variant;intron_variant,non_coding_transcript_variant	time_rem	0.00849	16.9	0.803	1020
LRRlongB37_genes.txt	16	78331559	WWOX	intron_variant,NMD_transcript_variant;intron_variant;intron_variant,non_coding_transcript_variant	time_rem_censor	0.00849	-0.251	0.484	1020
LRRlongB37_genes.txt	16	78331559	WWOX	intron_variant,NMD_transcript_variant;intron_variant;intron_variant,non_coding_transcript_variant	time_to_sez_censor	0.00849	0.314	0.364	1020
LRRlongB37_genes.txt	16	78332174	WWOX	intron_variant,NMD_transcript_variant;intron_variant;intron_variant,non_coding_transcript_variant	rem1	-0.0468	-0.133	0.403	1020
LRRlongB37_genes.txt	16	78332174	WWOX	intron_variant,NMD_transcript_variant;intron_variant;intron_variant,non_coding_transcript_variant	rem_12m	-0.0468	0.922	3.72e-09	1020
LRRlongB37_genes.txt	16	78332174	WWOX	intron_variant,NMD_transcript_variant;intron_variant;intron_variant,non_coding_transcript_variant	time_first_sez	-0.0468	-145	0.000144	1020
LRRlongB37_genes.txt	16	78332174	WWOX	intron_variant,NMD_transcript_variant;intron_variant;intron_variant,non_coding_transcript_variant	time_rem	-0.0468	154	1.5e-07	1020
LRRlongB37_genes.txt	16	78332174	WWOX	intron_variant,NMD_transcript_variant;intron_variant;intron_variant,non_coding_transcript_variant	time_rem_censor	-0.0468	-0.133	0.403	1020
LRRlongB37_genes.txt	16	78332174	WWOX	intron_variant,NMD_transcript_variant;intron_variant;intron_variant,non_coding_transcript_variant	time_to_sez_censor	-0.0468	1.11	1.81e-12	1020
LRRlongB37_genes.txt	16	78332721	WWOX	intron_variant,NMD_transcript_variant;intron_variant;intron_variant,non_coding_transcript_variant	rem1	-0.0452	0.0818	0.564	1020
LRRlongB37_genes.txt	16	78332721	WWOX	intron_variant,NMD_transcript_variant;intron_variant;intron_variant,non_coding_transcript_variant	rem_12m	-0.0452	0.373	0.00611	1020
[truncated: 13,831 more rows]

## Sheet: Australian cohort
AusGenoAllPheno_results_JointB37_genes.txt	chr16	78985073	JointModel	0.00152	NA	0.711	WWOX	intron_variant,NMD_transcript_variant;intron_variant
[truncated: 476 more rows]
