# Supplementary material for: Dosage effect of Copy Number Variation in Epilepsy and ten regions of the human brain
Source: Research Square preprint supplement (doi:10.21203/rs.3.rs-6130694/v1), 2025-04-15
Supplement: Supplementary file 3 [file 817b4d4622bd50485b55f7ae.xlsx]

## Sheet: Sheet1
Supplementary table 7. Transcriptional sense of nearby genes. Table showing the transcriptional sense and the NMF analysis (rank 2 to 6) of genes located close to each other in the genome. Top exon refers to the most frequent exon in the NMF gene programs. NMF analysis was done for every gene separately with a 5 kilo base window around the gene boundary (see methods).
	Gene	Strand	NMF top exon
	WWOX	+	last
	GNB1	-	last
	NADK	-	First exon
	GABRD	+	last
	PRKCZ	+	first
	DRD2	-	first
	NCAM1	+	last
	HTR3B	+	last
	HTR3A	+	out-of-frame
	DRD4	-	first
	DEAF1	-	in-frame
	GNB1L	-	last
	TBX1	+	exon 4
	CRHR2
	INMT	+	last
	HEATR1	-	exon 5/44
