# Supplementary material for: Dosage effect of Copy Number Variation in Epilepsy and ten regions of the human brain
Source: Research Square preprint supplement (doi:10.21203/rs.3.rs-6130694/v1), 2025-04-15
Supplement: Supplementary file 4 [file 818378dc8879cff7786d580d.xlsx]

## Sheet: Sheet1
Supplementary table 5. NMF results for chromosome 1p36 in UKBEC. Frequency of exons in different gene programs uncovered through the NMF analysis of UKBEC dataset for NMF ranks 10 and 20 for gene expression matrices a) average all and b) full set.
### Exon occurances in NMF gene programs ###
Location_Exon-probe-id	Frequency	Gene
chr1:3541803_2317444	4	TPRG1L
chr1:3542308_2317446	4	TPRG1L
chr1:3545078_2317448	4	TPRG1L
chr1:6101891_2318102	4	KCNAB2	cluster 2
chr1:6155427_2318124	4	KCNAB2	cluster 2
chr1:6155628_2318125	4	KCNAB2	cluster 2
chr1:7700482_2318550	4	CAMTA1	cluster 2
chr1:7737660_2318565	4	CAMTA1	cluster 2
chr1:7815698_2318595	4	CAMTA1	cluster 2
chr1:7826997_2318598	4	CAMTA1	cluster 2
chr1:7829492_2318599	4	CAMTA1	cluster 2
chr1:12726143_2320970	4	AADACL4
chr1:22416453_2324660	4	CDC42	cluster 1
chr1:22416555_2324661	4	CDC42	cluster 1
chr1:24105097_2325276	4	PITHD1
chr1:25773284_2326014	4	MACO1
chr1:27326584_2326861	4	TRNP1
chr1:3699281_2393719	4	LRRC47
chr1:6170480_2394487	4	CHD5	cluster 2
chr1:6185231_2394503	4	CHD5	cluster 2
chr1:6195312_2394522	4	CHD5	cluster 2
chr1:6324554_2394628	4	ACOT7	cluster 2
chr1:6341316_2394640	4	ACOT7	cluster 2
chr1:6354940_2394645	4	ACOT7	cluster 2
chr1:16582206_2398088	4	FBXO42
chr1:21929303_2400672	4	RAP1GAP	cluster 1
chr1:21930329_2400679	4	RAP1GAP	cluster 1
chr1:21934793_2400683	4	RAP1GAP	cluster 1
chr1:21935369_2400684	4	RAP1GAP	cluster 1
chr1:21938242_2400688	4	RAP1GAP	cluster 1
chr1:22033252_2400751	4	USP48	cluster 1
chr1:22204934_2400923	4	HSPG2	cluster 1
chr1:23420763_2401222	4	LUZP1	cluster 1
chr1:783084_2315391	3
chr1:787322_2315396	3
chr1:789403_2315402	3
chr1:791858_2315407	3
chr1:1104359_2315564	3
chr1:1115475_2315588	3
chr1:1447543_2316013	3
chr1:2075658_2316275	3
chr1:2077487_2316279	3
chr1:2080324_2316280	3
chr1:2087489_2316285	3
chr1:2100834_2316296	3
chr1:2435476_2316722	3
chr1:2435508_2316723	3
chr1:2436879_2316728	3
chr1:2939232_2316918	3
chr1:3272104_2317101	3
chr1:3321331_2317147	3
chr1:3327950_2317155	3
chr1:3328844_2317157	3
chr1:3347569_2317176	3
chr1:3352820_2317188	3
chr1:3353531_2317189	3
chr1:3394948_2317283	3
chr1:3773900_2317514	3
chr1:3784540_2317529	3
chr1:4829965_2317801	3
chr1:4832344_2317804	3
chr1:4834489_2317805	3
chr1:4842709_2317811	3
chr1:4843245_2317812	3
chr1:4843698_2317813	3
chr1:6154461_2318122	3
chr1:6157342_2318128	3
chr1:6266212_2318159	3
chr1:6268011_2318169	3
chr1:6269477_2318178	3
chr1:6272742_2318190	3
chr1:6304275_2318225	3
chr1:6484917_2318258	3
chr1:6508910_2318281	3
chr1:6649012_2318391	3
chr1:7151385_2318502	3
chr1:7309560_2318512	3
chr1:7527890_2318527	3
chr1:7792522_2318579	3
chr1:7796992_2318581	3
chr1:7798022_2318583	3
chr1:7805024_2318585	3
chr1:7805966_2318587	3
chr1:7807771_2318589	3
chr1:7811285_2318592	3
chr1:7812541_2318594	3
chr1:7844716_2318659	3
chr1:7879451_2318688	3
chr1:7880527_2318691	3
chr1:7887673_2318697	3
chr1:8022890_2318743	3
chr1:9655962_2319392	3
chr1:9662767_2319398	3
chr1:9776019_2319441	3
chr1:10190561_2319608	3
chr1:10190794_2319609	3
chr1:10205046_2319617	3
chr1:10240278_2319652	3
chr1:10240748_2319654	3
chr1:10335524_2319693	3
chr1:10339155_2319698	3
chr1:10355150_2319708	3
chr1:10434424_2319779	3
chr1:10459689_2319804	3
chr1:11078802_2320059	3
chr1:11084455_2320075	3
chr1:11084666_2320076	3
chr1:11085270_2320078	3
chr1:11575428_2320283	3
chr1:11584026_2320290	3
chr1:11589613_2320294	3
chr1:11718347_2320355	3
chr1:11875903_2320482	3
chr1:11879556_2320486	3
chr1:11882826_2320488	3
chr1:11886221_2320496	3
chr1:11887188_2320498	3
chr1:11888193_2320499	3
chr1:11888539_2320500	3
chr1:11888626_2320501	3
chr1:11893608_2320508	3
chr1:11893956_2320510	3
chr1:11894304_2320512	3
chr1:11894384_2320513	3
chr1:11897082_2320516	3
chr1:11900317_2320525	3
chr1:12123686_2320686	3
chr1:12169623_2320698	3
chr1:12294330_2320765	3
chr1:12309286_2320780	3
chr1:12317044_2320791	3
chr1:12320754_2320795	3
chr1:12321981_2320797	3
chr1:12327905_2320799	3
chr1:12339573_2320806	3
chr1:12342929_2320809	3
chr1:12343500_2320812	3
chr1:13910247_2321194	3
chr1:14107224_2321281	3
chr1:15287185_2321541	3
chr1:15387552_2321574	3
chr1:15392250_2321579	3
chr1:15392431_2321580	3
chr1:15653555_2321707	3
chr1:15736435_2321780	3
chr1:15756229_2321793	3
chr1:15789260_2321818	3
chr1:15855666_2321852	3
chr1:15873269_2321858	3
chr1:15888728_2321864	3
chr1:15893594_2321876	3
chr1:15894505_2321877	3
chr1:15895480_2321882	3
chr1:15896281_2321883	3
chr1:15964802_2321922	3
chr1:15970024_2321924	3
chr1:15986488_2321945	3
chr1:15987575_2321947	3
chr1:16091623_2322048	3
chr1:16332765_2322216	3
chr1:16332944_2322218	3
chr1:16345408_2322227	3
chr1:16375714_2322277	3
chr1:17296289_2322690	3
chr1:17557084_2322804	3
chr1:17721461_2322910	3
chr1:18702809_2323262	3
chr1:18703891_2323266	3
chr1:18704847_2323268	3
chr1:19578133_2323560	3
chr1:19638796_2323604	3
chr1:19934872_2323745	3
chr1:20220872_2323831	3
chr1:20517791_2323914	3
chr1:20809088_2324040	3
chr1:20959948_2324098	3
chr1:21894652_2324439	3
chr1:21896803_2324440	3
chr1:21900172_2324443	3
chr1:22140917_2324507	3
chr1:22304906_2324576	3
chr1:22416627_2324662	3
chr1:22418990_2324669	3
chr1:22827986_2324761	3
chr1:22828086_2324762	3
chr1:22828860_2324766	3
chr1:22838376_2324779	3
chr1:22970231_2324875	3
chr1:23232495_2324973	3
chr1:23395056_2325020	3
chr1:23406049_2325033	3
chr1:23407939_2325035	3
chr1:24076344_2325259	3
chr1:24106354_2325280	3
chr1:24112172_2325283	3
chr1:24112845_2325284	3
chr1:24121137_2325310	3
chr1:24662993_2325386	3
chr1:24669416_2325398	3
chr1:24771675_2325442	3
chr1:24779919_2325445	3
chr1:24792549_2325460	3
chr1:24862477_2325498	3
chr1:24969595_2325530	3
chr1:24981569_2325558	3
chr1:24989682_2325569	3
chr1:25775314_2326016	3
chr1:25944046_2326051	3
chr1:25944191_2326052	3
chr1:26098148_2326108	3
chr1:26110311_2326116	3
chr1:26488545_2326302	3
chr1:26549911_2326396	3
chr1:26550056_2326398	3
chr1:26566289_2326413	3
chr1:26759394_2326501	3
chr1:26764661_2326504	3
chr1:26769230_2326507	3
chr1:26784293_2326517	3
chr1:26795390_2326522	3
chr1:26887540_2326601	3
chr1:27092882_2326685	3
chr1:27107061_2326702	3
chr1:27107176_2326703	3
chr1:27114514_2326711	3
chr1:27587546_2326917	3
chr1:27661831_2326988	3
chr1:27676292_2327015	3
chr1:27676880_2327019	3
chr1:27722271_2327053	3
chr1:1009519_2391009	3
chr1:1019736_2391021	3
chr1:1025812_2391041	3
chr1:1051599_2391070	3
chr1:1146947_2391174	3
chr1:1167285_2391222	3
chr1:1177845_2391237	3
chr1:1240163_2391347	3
chr1:1251647_2391396	3
chr1:1289621_2391475	3
chr1:1290643_2391481	3
chr1:1366299_2391617	3
chr1:1470755_2391640	3
chr1:1480260_2391654	3
chr1:1710217_2391740	3
chr1:1668336_2391835	3
chr1:1668524_2391837	3
chr1:1718599_2391848	3
chr1:2139104_2392153	3
chr1:2305901_2392350	3
chr1:2307755_2392357	3
chr1:2323042_2392402	3
chr1:2453158_2392557	3
chr1:2460741_2392576	3
chr1:2523002_2392669	3
chr1:2524094_2392672	3
chr1:2525253_2392676	3
chr1:2525837_2392678	3
chr1:3519092_2393427	3
chr1:3447832_2393531	3
chr1:3742934_2393761	3
chr1:3806578_2393820	3
chr1:3807305_2393822	3
chr1:6184577_2394500	3
chr1:6206313_2394530	3
chr1:6208933_2394533	3
chr1:6214909_2394547	3
chr1:6285182_2394594	3
chr1:6291987_2394595	3
chr1:6293576_2394596	3
chr1:6445727_2394667	3
chr1:6453782_2394674	3
chr1:6529613_2394737	3
chr1:6530351_2394738	3
chr1:6556708_2394774	3
chr1:6593341_2394799	3
chr1:6601943_2394800	3
chr1:6605111_2394803	3
chr1:6609641_2394806	3
chr1:6610470_2394807	3
chr1:6662933_2394829	3
chr1:6706011_2394859	3
chr1:6712896_2394868	3
chr1:6761790_2394884	3
chr1:7913502_2395134	3
chr1:7980152_2395148	3
chr1:8072859_2395183	3
chr1:8075368_2395189	3
chr1:8075555_2395190	3
chr1:9211837_2395674	3
chr1:9794031_2395906	3
chr1:9795110_2395907	3
chr1:9795957_2395911	3
chr1:9797568_2395913	3
chr1:9990429_2396019	3
chr1:10709127_2396224	3
chr1:10725319_2396247	3
chr1:10856624_2396300	3
chr1:11105180_2396441	3
chr1:11128702_2396489	3
chr1:11137014_2396502	3
chr1:11167159_2396542	3
chr1:11168255_2396543	3
chr1:11174870_2396550	3
chr1:11177075_2396555	3
chr1:11187072_2396562	3
chr1:11187721_2396563	3
chr1:11188923_2396569	3
chr1:11199604_2396581	3
chr1:11270881_2396604	3
chr1:11291392_2396612	3
chr1:11293455_2396614	3
chr1:11301638_2396619	3
chr1:11855194_2396828	3
chr1:11856293_2396829	3
chr1:11860276_2396832	3
chr1:12290003_2396975	3
chr1:12290050_2396976	3
chr1:12676728_2397071	3
chr1:15833423_2397714	3
chr1:16343729_2397903	3
chr1:16532862_2398018	3
chr1:16547538_2398047	3
chr1:16563240_2398069	3
chr1:16574138_2398078	3
chr1:16579594_2398082	3
chr1:16632324_2398099	3
chr1:16793991_2398194	3
chr1:16795846_2398196	3
chr1:16901786_2398302	3
chr1:16933304_2398335	3
chr1:16952061_2398386	3
chr1:16956499_2398396	3
chr1:17303604_2398722	3
chr1:17320134_2398759	3
chr1:17331888_2398782	3
chr1:17354244_2398807	3
chr1:17359556_2398812	3
chr1:17371259_2398813	3
chr1:19166583_2399294	3
chr1:19415323_2399438	3
chr1:19419807_2399442	3
chr1:19421420_2399444	3
chr1:19422047_2399445	3
chr1:19426104_2399450	3
chr1:19431272_2399459	3
chr1:19440215_2399473	3
chr1:19440458_2399475	3
chr1:19455493_2399507	3
chr1:19464629_2399515	3
chr1:19476257_2399533	3
chr1:19477074_2399534	3
chr1:19481937_2399547	3
chr1:19488968_2399558	3
chr1:19491770_2399562	3
chr1:19493532_2399564	3
chr1:19499676_2399573	3
chr1:19499938_2399574	3
chr1:19500834_2399575	3
chr1:19513048_2399587	3
chr1:19513951_2399589	3
chr1:19518708_2399590	3
chr1:19518990_2399592	3
chr1:19524492_2399598	3
chr1:19544135_2399626	3
chr1:19545827_2399630	3
chr1:19559484_2399648	3
chr1:19563646_2399651	3
chr1:19567525_2399663	3
chr1:19571402_2399668	3
chr1:19670878_2399783	3
chr1:19683916_2399800	3
chr1:19705041_2399815	3
chr1:19712065_2399821	3
chr1:20126373_2399971	3
chr1:20249219_2400015	3
chr1:20250067_2400017	3
chr1:20302194_2400029	3
chr1:20755081_2400152	3
chr1:21043842_2400282	3
chr1:21059289_2400307	3
chr1:21100340_2400346	3
chr1:21101687_2400347	3
chr1:21102457_2400348	3
chr1:21103164_2400350	3
chr1:21106943_2400356	3
chr1:21133839_2400376	3
chr1:21137265_2400378	3
chr1:21139665_2400380	3
chr1:21143886_2400381	3
chr1:21151625_2400382	3
chr1:21154115_2400385	3
chr1:21175915_2400392	3
chr1:21177759_2400395	3
chr1:21188740_2400401	3
chr1:21191015_2400403	3
chr1:21205829_2400409	3
chr1:21496162_2400497	3
chr1:21503215_2400501	3
chr1:21616692_2400576	3
chr1:21671872_2400591	3
chr1:21938537_2400689	3
chr1:21940121_2400692	3
chr1:21944427_2400697	3
chr1:21945533_2400698	3
chr1:21952814_2400702	3
chr1:22007301_2400733	3
chr1:22012735_2400736	3
chr1:22013684_2400738	3
chr1:22050730_2400762	3
chr1:22054686_2400766	3
chr1:22055063_2400767	3
chr1:22078007_2400777	3
chr1:22079524_2400780	3
chr1:22084167_2400783	3
chr1:22149064_2400798	3
chr1:22149126_2400799	3
chr1:22160325_2400835	3
chr1:22186690_2400892	3
chr1:22188264_2400893	3
chr1:22192246_2400898	3
chr1:22199410_2400906	3
chr1:22200418_2400909	3
chr1:22202412_2400918	3
chr1:22215161_2400943	3
chr1:23289619_2401171	3
chr1:23410611_2401202	3
chr1:23417733_2401217	3
chr1:23418485_2401218	3
chr1:23650111_2401309	3
chr1:23660011_2401313	3
chr1:23758189_2401396	3
chr1:23836438_2401457	3
chr1:23850889_2401469	3
chr1:23884746_2401495	3
chr1:24127001_2401607	3
chr1:24172628_2401648	3
chr1:24175163_2401649	3
chr1:24390562_2401689	3
chr1:24447877_2401759	3
chr1:24487986_2401789	3
chr1:24507265_2401797	3
chr1:24683715_2401850	3
chr1:24684322_2401851	3
chr1:24696216_2401858	3
chr1:24706162_2401864	3
chr1:24710411_2401868	3
chr1:24727809_2401877	3
chr1:24727878_2401878	3
chr1:25229068_2401997	3
chr1:25569080_2402117	3
chr1:25570458_2402120	3
chr1:25571117_2402123	3
chr1:26226674_2402461	3
chr1:26229002_2402468	3
chr1:26230217_2402470	3
chr1:26231171_2402471	3
chr1:26387735_2402545	3
chr1:26498126_2402588	3
chr1:26610864_2402616	3
chr1:26620719_2402622	3
chr1:26662829_2402659	3
chr1:26663436_2402663	3
chr1:27440323_2402964	3
chr1:27480858_2402984	3
chr1:27687211_2403056	3
chr1:27687654_2403059	3
chr1:27695790_2403083	3
chr1:27939425_2403218	3
chr1:27948116_2403233	3
chr1:1564820_4042427	3
chr1:1533410_4044752	3
chr1:876630_4053438	3
chr1:879408_4053449	3
chr1:905910_4053503	3
chr1:906143_4053505	3
chr1:906458_4053508	3
chr1:2005190_4054482	3
chr1:1986895_4054530	3
chr1:23403752_2325031	3
chr1:27326368_2326860	3
chr1:20829715_2400198	3
chr1:17570772_2322815	3
chr1:17606884_2322840	3
chr1:20675597_2323989	3
chr1:15326210_2397549	3
chr1:24199589_4044388	3
chr1:12463928_2320867	2
chr1:12815667_2321016	2
chr1:18152821_2323096	2
chr1:24673958_2325403	2
chr1:1141779_2391159	2
chr1:1208880_2391290	2
chr1:2441499_2392533	2
chr1:3416189_2393485	2
chr1:19436901_2399466	2
chr1:22183541_2400887	2
chr1:26185849_2402428	2
chr1:898844_4053481	2
chr1:1290221_2315817	2
chr1:2334769_2316588	2
chr1:9777650_2319449	2
chr1:11084255_2320073	2
chr1:12516146_2320882	2
chr1:15361247_2321562	2
chr1:15860771_2321853	2
chr1:15892577_2321872	2
chr1:21904378_2324453	2
chr1:24646067_2325372	2
chr1:24861868_2325497	2
chr1:26448359_2326293	2
chr1:26603823_2326443	2
chr1:2268261_2392308	2
chr1:6294474_2394597	2
chr1:6522081_2394703	2
chr1:6697276_2394846	2
chr1:6761878_2394885	2
chr1:7109913_2394980	2
chr1:9101844_2395588	2
chr1:11158090_2396531	2
chr1:15818839_2397702	2
chr1:16302495_2397892	2
chr1:16461540_2397965	2
chr1:19545880_2399631	2
chr1:19557773_2399645	2
chr1:19684008_2399802	2
chr1:20700142_2400140	2
chr1:21070026_2400325	2
chr1:21545479_2400525	2
chr1:21940488_2400693	2
chr1:22056204_2400768	2
chr1:22063033_2400772	2
chr1:22148975_2400797	2
chr1:24426181_2401744	2
chr1:26314751_2402505	2
chr1:1117775_2315595	2
chr1:1335249_2315864	2
chr1:1376133_2315909	2
chr1:1398753_2315946	2
chr1:2116451_2316323	2
chr1:2431080_2316704	2
chr1:3546367_2317450	2
chr1:3546599_2317451	2
chr1:3673303_2317478	2
chr1:3687975_2317493	2
chr1:3800820_2317541	2
chr1:4771989_2317780	2
chr1:4476374_2317887	2
chr1:4482832_2317888	2
chr1:6280961_2318200	2
chr1:6648824_2318389	2
chr1:8395498_2318967	2
chr1:9017214_2319148	2
chr1:9642643_2319379	2
chr1:9751538_2319434	2
chr1:9784374_2319466	2
chr1:10041173_2319528	2
chr1:10042439_2319530	2
chr1:10043183_2319533	2
chr1:10290854_2319671	2
chr1:10332300_2319688	2
chr1:10490198_2319833	2
chr1:10493899_2319840	2
chr1:10502354_2319848	2
chr1:11084128_2320072	2
chr1:11825915_2320436	2
chr1:12008047_2320589	2
chr1:12052633_2320630	2
chr1:12785192_2320992	2
chr1:14059313_2321253	2
chr1:15578283_2321674	2
chr1:15627858_2321693	2
chr1:15644341_2321701	2
chr1:15651218_2321704	2
chr1:15724188_2321765	2
chr1:15769926_2321804	2
chr1:15817864_2321840	2
chr1:15853143_2321850	2
chr1:15901717_2321891	2
chr1:15901834_2321892	2
chr1:16101326_2322053	2
chr1:16162914_2322095	2
chr1:16782358_2322402	2
chr1:17200529_2322510	2
chr1:16971883_2322521	2
chr1:17294960_2322685	2
chr1:17521680_2322784	2
chr1:17556613_2322802	2
chr1:17567138_2322812	2
chr1:17571241_2322816	2
chr1:17685856_2322883	2
chr1:17706415_2322900	2
chr1:17949522_2323007	2
chr1:17953494_2323011	2
chr1:17966707_2323023	2
chr1:18703007_2323264	2
chr1:19726102_2323649	2
chr1:19726179_2323650	2
chr1:19934420_2323744	2
chr1:19953269_2323771	2
chr1:20230816_2323834	2
chr1:20231388_2323835	2
chr1:20232931_2323837	2
chr1:20412903_2323868	2
chr1:20640872_2323961	2
chr1:20662888_2323978	2
chr1:20881454_2324075	2
chr1:20960070_2324099	2
chr1:22351717_2324617	2
chr1:22356929_2324623	2
chr1:22902744_2324830	2
chr1:24075535_2325258	2
chr1:24834097_2325483	2
chr1:24840804_2325484	2
chr1:24932335_2325519	2
chr1:25656731_2325900	2
chr1:25757590_2326007	2
chr1:26146740_2326161	2
chr1:26438339_2326288	2
chr1:26497152_2326321	2
chr1:26506825_2326332	2
chr1:26506953_2326333	2
chr1:26524791_2326371	2
chr1:26527377_2326374	2
chr1:26758877_2326498	2
chr1:26878142_2326585	2
chr1:27248708_2326807	2
chr1:27648788_2326958	2
chr1:1154152_2391195	2
chr1:1231447_2391315	2
chr1:1233952_2391321	2
chr1:1241360_2391351	2
chr1:1246798_2391361	2
chr1:1655745_2391801	2
chr1:1669101_2391819	2
chr1:2121161_2392106	2
chr1:2129451_2392129	2
chr1:2129661_2392131	2
chr1:2321386_2392396	2
chr1:2283221_2392409	2
chr1:2335307_2392422	2
chr1:2445812_2392545	2
chr1:2522102_2392667	2
chr1:2537003_2392691	2
chr1:3549962_2393550	2
chr1:3551582_2393555	2
chr1:3553460_2393561	2
chr1:3566502_2393581	2
chr1:3653167_2393662	2
chr1:3729034_2393741	2
chr1:3811918_2393829	2
chr1:5812303_2394336	2
chr1:5936970_2394388	2
chr1:6162839_2394480	2
chr1:6185863_2394506	2
chr1:6188142_2394509	2
chr1:6191691_2394515	2
chr1:6196654_2394523	2
chr1:6202214_2394526	2
chr1:6204098_2394529	2
chr1:6209441_2394537	2
chr1:6282610_2394591	2
chr1:6282919_2394592	2
chr1:6307490_2394609	2
chr1:6532588_2394750	2
chr1:6585927_2394791	2
chr1:6586761_2394792	2
chr1:6604890_2394801	2
chr1:6614583_2394811	2
chr1:6694252_2394842	2
chr1:6696177_2394845	2
chr1:6738474_2394877	2
chr1:6740986_2394879	2
chr1:7906766_2395126	2
chr1:7913064_2395132	2
chr1:8585928_2395327	2
chr1:9063396_2395546	2
chr1:9995602_2396025	2
chr1:10441285_2396097	2
chr1:10754354_2396255	2
chr1:11015112_2396383	2
chr1:11128067_2396487	2
chr1:11166641_2396538	2
chr1:11741378_2396797	2
chr1:11852386_2396822	2
chr1:11854812_2396827	2
chr1:12281013_2396973	2
chr1:15478910_2397609	2
chr1:15497711_2397619	2
chr1:15817407_2397698	2
chr1:15819531_2397705	2
chr1:15844744_2397719	2
chr1:15909688_2397746	2
chr1:16268380_2397848	2
chr1:16272501_2397875	2
chr1:16299573_2397891	2
chr1:16560109_2398067	2
chr1:16563131_2398068	2
chr1:16579727_2398084	2
chr1:16619573_2398097	2
chr1:16763625_2398174	2
chr1:16802333_2398202	2
chr1:19166633_2399295	2
chr1:19398684_2399406	2
chr1:19438606_2399470	2
chr1:19477608_2399538	2
chr1:19477862_2399539	2
chr1:19547376_2399638	2
chr1:19679251_2399795	2
chr1:20141721_2399993	2
chr1:20828566_2400196	2
chr1:20834524_2400200	2
chr1:21053503_2400298	2
chr1:21155655_2400386	2
chr1:21181520_2400398	2
chr1:21924460_2400666	2
chr1:21976255_2400707	2
chr1:22148911_2400796	2
chr1:23414047_2401204	2
chr1:23414232_2401205	2
chr1:23435666_2401224	2
chr1:23436078_2401225	2
chr1:23694580_2401343	2
chr1:23833146_2401450	2
chr1:23835174_2401453	2
chr1:24136099_2401622	2
chr1:24172104_2401646	2
chr1:24410958_2401724	2
chr1:24446264_2401755	2
chr1:24741483_2401882	2
chr1:25548929_2402085	2
chr1:25549203_2402086	2
chr1:25551500_2402090	2
chr1:25558970_2402098	2
chr1:26147265_2402405	2
chr1:26162093_2402423	2
chr1:26287663_2402495	2
chr1:26611111_2402617	2
chr1:26629380_2402633	2
chr1:26691054_2402700	2
chr1:27205782_2402843	2
chr1:27226673_2402882	2
chr1:27426863_2402946	2
chr1:27428531_2402950	2
chr1:27432266_2402960	2
chr1:1535833_4042375	2
chr1:1916438_4053258	2
chr1:1903441_4053267	2
chr1:898918_4053482	2
chr1:899750_4053485	2
chr1:1962131_4054484	2
chr1:894357_4054672	2
chr1:911437_4054683	2
chr1:7111520_2394982	2
chr1:8000067_2395161	2
chr1:9161482_2395620	2
chr1:27693195_2403078	2
chr1:7907889_2395129	2
chr1:16727227_2398155	2
chr1:139309_2315165	1
chr1:791311_2315406	1
chr1:792034_2315408	1
chr1:792566_2315409	1
chr1:793760_2315411	1
chr1:1076223_2315524	1
chr1:1078145_2315525	1
chr1:1078341_2315526	1
chr1:1103251_2315562	1
chr1:1109818_2315574	1
chr1:1114588_2315583	1
chr1:1115038_2315585	1
chr1:1115895_2315589	1
chr1:1116120_2315591	1
chr1:1117122_2315594	1
chr1:1118258_2315596	1
chr1:1119333_2315598	1
chr1:1120398_2315602	1
chr1:1120490_2315603	1
chr1:1120561_2315604	1
chr1:1120913_2315607	1
chr1:1132010_2315612	1
chr1:1132484_2315614	1
chr1:1132821_2315615	1
chr1:1132991_2315616	1
chr1:1167689_2315638	1
chr1:1167873_2315639	1
chr1:1167993_2315640	1
chr1:1168112_2315641	1
chr1:1168265_2315642	1
chr1:1168936_2315643	1
chr1:1170171_2315644	1
chr1:1170252_2315645	1
chr1:1215886_2315683	1
chr1:1216107_2315684	1
chr1:1216612_2315686	1
chr1:1216681_2315687	1
chr1:1216825_2315688	1
chr1:1216920_2315689	1
chr1:1217315_2315690	1
chr1:1217503_2315692	1
chr1:1219405_2315697	1
chr1:1220999_2315701	1
chr1:1221479_2315709	1
chr1:1222151_2315713	1
chr1:1222502_2315714	1
chr1:1222915_2315716	1
chr1:1223011_2315717	1
chr1:1223105_2315718	1
chr1:1225689_2315720	1
chr1:1226451_2315726	1
chr1:1226715_2315727	1
chr1:1226913_2315728	1
chr1:1226998_2315729	1
chr1:1227091_2315730	1
chr1:1227247_2315731	1
chr1:1243987_2315740	1
chr1:1244024_2315741	1
chr1:1244306_2315743	1
chr1:1244473_2315744	1
chr1:1244894_2315745	1
chr1:1245097_2315747	1
chr1:1245492_2315749	1
chr1:1246072_2315751	1
chr1:1246350_2315754	1
chr1:1246760_2315757	1
chr1:1246942_2315758	1
chr1:1246983_2315759	1
chr1:1268043_2315791	1
chr1:1289848_2315816	1
chr1:1335375_2315865	1
chr1:1337785_2315869	1
chr1:1355736_2315878	1
chr1:1362986_2315886	1
chr1:1370909_2315896	1
chr1:1385169_2315920	1
chr1:1404605_2315941	1
chr1:1398814_2315947	1
chr1:1419189_2315975	1
chr1:1421304_2315981	1
chr1:1425266_2315990	1
chr1:1431598_2316000	1
chr1:1432273_2316001	1
chr1:1432375_2316002	1
chr1:1458166_2316031	1
chr1:1463126_2316046	1
chr1:1468295_2316056	1
chr1:1469418_2316060	1
chr1:1469454_2316061	1
chr1:1510527_2316083	1
chr1:1822677_2316207	1
chr1:1823719_2316209	1
chr1:1846331_2316221	1
chr1:2030641_2316242	1
chr1:2036221_2316246	1
chr1:2066701_2316269	1
chr1:2075915_2316276	1
chr1:2076846_2316278	1
chr1:2082262_2316282	1
chr1:2100552_2316295	1
chr1:2100976_2316297	1
chr1:2103524_2316298	1
chr1:2103749_2316299	1
chr1:2105336_2316300	1
chr1:2106703_2316304	1
chr1:2116026_2316321	1
chr1:2116363_2316322	1
chr1:2116527_2316324	1
chr1:2116657_2316325	1
chr1:2121360_2316346	1
chr1:2121483_2316348	1
chr1:2122102_2316349	1
chr1:2121837_2316351	1
chr1:2160216_2316388	1
chr1:2160309_2316389	1
chr1:2160558_2316391	1
chr1:2160702_2316392	1
chr1:2160962_2316393	1
chr1:2161065_2316394	1
chr1:2234433_2316449	1
chr1:2234729_2316450	1
chr1:2235295_2316452	1
chr1:2235746_2316455	1
chr1:2235801_2316456	1
chr1:2235946_2316457	1
chr1:2237465_2316460	1
chr1:2238034_2316461	1
chr1:2238301_2316463	1
chr1:2238465_2316464	1
chr1:2238768_2316465	1
chr1:2238904_2316466	1
chr1:2239543_2316467	1
chr1:2323260_2316559	1
chr1:2325359_2316563	1
chr1:2326350_2316565	1
chr1:2326984_2316567	1
chr1:2327121_2316569	1
chr1:2327244_2316570	1
chr1:2328556_2316575	1
chr1:2330865_2316576	1
chr1:2332296_2316579	1
chr1:2333543_2316581	1
chr1:2333646_2316582	1
chr1:2334485_2316584	1
chr1:2334576_2316586	1
chr1:2334716_2316587	1
chr1:2335343_2316589	1
chr1:2336511_2316590	1
chr1:2357424_2316606	1
chr1:2361901_2316615	1
chr1:2398929_2316650	1
chr1:2407818_2316663	1
chr1:2408113_2316667	1
chr1:2409976_2316669	1
chr1:2410668_2316671	1
chr1:2411208_2316672	1
chr1:2411265_2316673	1
chr1:2411325_2316674	1
chr1:2411626_2316677	1
chr1:2415888_2316680	1
chr1:2418357_2316682	1
chr1:2418668_2316683	1
chr1:2419056_2316684	1
chr1:2422632_2316687	1
chr1:2426327_2316692	1
chr1:2428063_2316695	1
chr1:2428277_2316696	1
chr1:2428941_2316697	1
chr1:2430010_2316701	1
chr1:2430236_2316702	1
chr1:2433582_2316711	1
chr1:2433726_2316712	1
chr1:2433931_2316713	1
chr1:2434419_2316714	1
chr1:2434578_2316715	1
chr1:2434868_2316717	1
chr1:2435056_2316718	1
chr1:2435133_2316719	1
chr1:2435407_2316721	1
chr1:2435657_2316724	1
chr1:2435810_2316725	1
chr1:2436660_2316726	1
chr1:2518325_2316756	1
chr1:2518603_2316758	1
chr1:2519859_2316761	1
chr1:2520142_2316764	1
chr1:2520439_2316766	1
chr1:2520911_2316767	1
chr1:2521075_2316768	1
chr1:2521915_2316770	1
chr1:2938101_2316916	1
chr1:2938645_2316917	1
chr1:2939273_2316919	1
chr1:2939385_2316920	1
chr1:3102707_2317021	1
chr1:3160651_2317067	1
chr1:3301743_2317130	1
chr1:3313058_2317139	1
chr1:3319355_2317146	1
chr1:3322087_2317148	1
chr1:3328485_2317156	1
chr1:3328994_2317158	1
chr1:3329226_2317159	1
chr1:3331127_2317162	1
chr1:3334393_2317164	1
chr1:3335251_2317165	1
chr1:3342192_2317167	1
chr1:3342696_2317168	1
chr1:3347442_2317175	1
chr1:3348541_2317178	1
chr1:3350251_2317181	1
chr1:3350300_2317182	1
chr1:3350544_2317183	1
chr1:3351522_2317184	1
chr1:3352446_2317186	1
chr1:3353763_2317191	1
chr1:3353804_2317192	1
chr1:3354147_2317193	1
chr1:3371192_2317247	1
chr1:3379692_2317252	1
chr1:3382585_2317253	1
chr1:3383775_2317259	1
chr1:3385464_2317261	1
chr1:3386001_2317262	1
chr1:3388302_2317266	1
chr1:3389364_2317268	1
chr1:3389673_2317269	1
chr1:3389958_2317270	1
chr1:3390110_2317272	1
chr1:3391290_2317275	1
chr1:3394479_2317280	1
chr1:3394791_2317282	1
chr1:3395007_2317284	1
chr1:3396378_2317287	1
chr1:3397014_2317288	1
chr1:3397059_2317289	1
chr1:3397178_2317290	1
chr1:3569115_2317349	1
chr1:3598953_2317357	1
chr1:3599687_2317358	1
chr1:3607251_2317366	1
chr1:3607335_2317368	1
chr1:3607411_2317369	1
chr1:3607471_2317370	1
chr1:3624200_2317381	1
chr1:3638676_2317387	1
chr1:3639926_2317388	1
chr1:3643679_2317389	1
chr1:3644208_2317391	1
chr1:3645945_2317393	1
chr1:3646590_2317394	1
chr1:3647517_2317396	1
chr1:3648038_2317397	1
chr1:3649335_2317399	1
chr1:3649710_2317400	1
chr1:3541584_2317442	1
chr1:3541640_2317443	1
chr1:3542031_2317445	1
chr1:3544105_2317447	1
chr1:3545308_2317449	1
chr1:3669081_2317474	1
chr1:3669279_2317475	1
chr1:3670692_2317476	1
chr1:3672027_2317477	1
chr1:3677856_2317480	1
chr1:3679184_2317483	1
chr1:3679793_2317485	1
chr1:3679960_2317486	1
chr1:3683108_2317488	1
chr1:3683820_2317489	1
chr1:3683960_2317490	1
chr1:3686347_2317492	1
chr1:3688092_2317495	1
chr1:3689664_2317505	1
chr1:3691880_2317507	1
chr1:3691950_2317508	1
chr1:3692364_2317510	1
chr1:3692486_2317511	1
chr1:3774027_2317515	1
chr1:3774209_2317517	1
chr1:3775283_2317518	1
chr1:3782231_2317520	1
chr1:3782328_2317522	1
chr1:3782387_2317523	1
chr1:3786242_2317530	1
chr1:3800212_2317539	1
chr1:3800308_2317540	1
chr1:3801672_2317542	1
chr1:3816998_2317558	1
chr1:3817145_2317559	1
chr1:3820532_2317560	1
chr1:4000723_2317569	1
chr1:4001092_2317571	1
chr1:4012359_2317578	1
chr1:4013105_2317579	1
chr1:4014185_2317580	1
chr1:4714865_2317746	1
chr1:4715486_2317748	1
chr1:4772065_2317781	1
chr1:4772209_2317783	1
chr1:4772546_2317784	1
chr1:4837431_2317807	1
chr1:4837518_2317808	1
chr1:4838882_2317809	1
chr1:4472157_2317885	1
chr1:4483408_2317889	1
chr1:4484305_2317890	1
chr1:6052564_2318088	1
chr1:6078697_2318092	1
chr1:6086402_2318094	1
chr1:6087437_2318095	1
chr1:6094468_2318097	1
chr1:6100630_2318100	1
chr1:6133794_2318106	1
chr1:6151324_2318120	1
chr1:6156710_2318127	1
chr1:6158247_2318129	1
chr1:6159260_2318131	1
chr1:6111603_2318133	1
chr1:6265877_2318158	1
chr1:6266256_2318160	1
chr1:6266651_2318163	1
chr1:6267608_2318166	1
chr1:6267723_2318167	1
chr1:6267830_2318168	1
chr1:6268769_2318171	1
chr1:6268954_2318172	1
chr1:6269219_2318174	1
chr1:6269538_2318179	1
chr1:6270315_2318181	1
chr1:6270639_2318183	1
chr1:6270946_2318184	1
chr1:6271086_2318186	1
chr1:6272359_2318189	1
chr1:6272794_2318191	1
chr1:6272997_2318192	1
chr1:6277213_2318195	1
chr1:6278350_2318196	1
chr1:6278480_2318197	1
chr1:6279013_2318198	1
chr1:6279449_2318199	1
chr1:6297874_2318216	1
chr1:6298347_2318217	1
chr1:6298792_2318218	1
chr1:6299012_2318219	1
chr1:6303718_2318224	1
chr1:6304608_2318227	1
chr1:6305190_2318228	1
chr1:6305233_2318229	1
chr1:6305340_2318230	1
chr1:6305445_2318231	1
chr1:6305555_2318232	1
chr1:6326914_2318244	1
chr1:6327244_2318245	1
chr1:6485053_2318259	1
chr1:6485207_2318260	1
chr1:6504568_2318271	1
chr1:6520113_2318310	1
chr1:6520362_2318312	1
chr1:6521266_2318314	1
chr1:6615338_2318344	1
chr1:6615440_2318345	1
chr1:6630978_2318350	1
chr1:6631032_2318351	1
chr1:6634722_2318352	1
chr1:6636517_2318353	1
chr1:6637016_2318354	1
chr1:6638748_2318355	1
chr1:6638922_2318356	1
chr1:6639056_2318357	1
chr1:6639356_2318358	1
chr1:6639539_2318360	1
chr1:6639675_2318361	1
chr1:6640135_2318365	1
chr1:6640601_2318366	1
chr1:6640674_2318368	1
chr1:6642146_2318371	1
chr1:6645479_2318373	1
chr1:6646055_2318375	1
chr1:6646137_2318376	1
chr1:6646905_2318380	1
chr1:6647308_2318381	1
chr1:6647581_2318384	1
chr1:6648120_2318385	1
chr1:6648377_2318387	1
chr1:6648536_2318388	1
chr1:6673798_2318402	1
chr1:6674127_2318403	1
chr1:6676846_2318405	1
chr1:6679900_2318406	1
chr1:6680087_2318407	1
chr1:6680134_2318408	1
chr1:6680232_2318409	1
chr1:6681539_2318411	1
chr1:6681651_2318412	1
chr1:6681791_2318413	1
chr1:6682380_2318414	1
chr1:6684873_2318417	1
chr1:6688606_2318423	1
chr1:6693262_2318430	1
chr1:6694099_2318433	1
chr1:6845394_2318456	1
chr1:6845453_2318457	1
chr1:6845541_2318458	1
chr1:6880251_2318463	1
chr1:6885188_2318464	1
chr1:6931817_2318474	1
chr1:6931940_2318475	1
chr1:7723419_2318557	1
chr1:7723596_2318558	1
chr1:7723787_2318559	1
chr1:7730973_2318561	1
chr1:7796465_2318580	1
chr1:7797351_2318582	1
chr1:7804901_2318584	1
chr1:7805905_2318586	1
chr1:7833517_2318642	1
chr1:7837273_2318647	1
chr1:7838178_2318649	1
chr1:7839936_2318652	1
chr1:7840706_2318653	1
chr1:7841394_2318654	1
chr1:7845526_2318661	1
chr1:7846797_2318663	1
chr1:7848136_2318667	1
chr1:7858645_2318673	1
chr1:7863112_2318675	1
chr1:7863766_2318676	1
chr1:7863958_2318677	1
chr1:7868964_2318679	1
chr1:7869967_2318680	1
chr1:7870501_2318682	1
chr1:7879378_2318687	1
chr1:7880210_2318690	1
chr1:7880619_2318692	1
chr1:7886609_2318693	1
chr1:7887182_2318695	1
chr1:7887749_2318698	1
chr1:7895824_2318703	1
chr1:7895875_2318704	1
chr1:7895939_2318705	1
chr1:7897169_2318708	1
chr1:7902749_2318711	1
chr1:7903019_2318712	1
chr1:7903618_2318713	1
chr1:7903821_2318714	1
chr1:7904571_2318715	1
chr1:7905006_2318716	1
chr1:8021924_2318740	1
chr1:8022035_2318741	1
chr1:8030992_2318747	1
chr1:8031284_2318748	1
chr1:8037730_2318751	1
chr1:8044977_2318754	1
chr1:8045210_2318755	1
chr1:8043286_2318859	1
chr1:8043537_2318861	1
chr1:8043797_2318863	1
chr1:8044388_2318867	1
chr1:8044653_2318869	1
chr1:8378218_2318953	1
chr1:8384492_2318955	1
chr1:8384647_2318956	1
chr1:8385372_2318957	1
chr1:8385891_2318958	1
chr1:8390296_2318961	1
chr1:8397883_2318968	1
chr1:8399606_2318969	1
chr1:8403867_2318971	1
chr1:8404082_2318972	1
chr1:9011778_2319146	1
chr1:9012553_2319147	1
chr1:9017284_2319149	1
chr1:9018989_2319150	1
chr1:9022657_2319151	1
chr1:9027738_2319152	1
chr1:9030944_2319153	1
chr1:9034702_2319155	1
chr1:9034835_2319156	1
chr1:9294938_2319227	1
chr1:9305063_2319233	1
chr1:9307039_2319238	1
chr1:9322144_2319244	1
chr1:9323601_2319245	1
chr1:9325070_2319246	1
chr1:9328468_2319247	1
chr1:9330042_2319248	1
chr1:9352942_2319253	1
chr1:9411469_2319275	1
chr1:9415766_2319277	1
chr1:9415815_2319278	1
chr1:9416164_2319279	1
chr1:9427522_2319282	1
chr1:9427636_2319283	1
chr1:9427925_2319285	1
chr1:9428354_2319286	1
chr1:9429356_2319288	1
chr1:9429472_2319289	1
chr1:9636015_2319364	1
chr1:9636457_2319365	1
chr1:9636545_2319366	1
chr1:9636668_2319367	1
chr1:9649049_2319387	1
chr1:9656917_2319393	1
chr1:9658555_2319394	1
chr1:9661244_2319395	1
chr1:9662129_2319396	1
chr1:9662358_2319397	1
chr1:9662849_2319399	1
chr1:9663581_2319400	1
chr1:9667663_2319403	1
chr1:9667740_2319404	1
chr1:9669898_2319405	1
chr1:9670569_2319407	1
chr1:9670690_2319408	1
chr1:9671811_2319411	1
chr1:9673077_2319412	1
chr1:9673301_2319413	1
chr1:9674261_2319414	1
chr1:9711720_2319426	1
chr1:9770176_2319436	1
chr1:9770482_2319437	1
chr1:9770559_2319438	1
chr1:9775623_2319439	1
chr1:9775907_2319440	1
chr1:9776536_2319444	1
chr1:9776651_2319445	1
chr1:9777029_2319446	1
chr1:9777123_2319447	1
chr1:9778766_2319450	1
chr1:9780015_2319451	1
chr1:9780183_2319452	1
chr1:9780556_2319453	1
chr1:9780633_2319454	1
chr1:9780806_2319456	1
chr1:9781241_2319457	1
chr1:9781534_2319458	1
chr1:9781820_2319459	1
chr1:9782036_2319460	1
chr1:9783210_2319464	1
chr1:9784029_2319465	1
chr1:9787031_2319468	1
chr1:9787400_2319469	1
chr1:9788697_2319470	1
chr1:10003442_2319519	1
chr1:10003542_2319520	1
chr1:10041759_2319529	1
chr1:10042768_2319532	1
chr1:10044512_2319534	1
chr1:10045214_2319535	1
chr1:10057318_2319551	1
chr1:10067628_2319553	1
chr1:10067676_2319554	1
chr1:10068241_2319555	1
chr1:10075943_2319557	1
chr1:10093003_2319561	1
chr1:10132089_2319567	1
chr1:10132170_2319568	1
chr1:10132246_2319569	1
chr1:10132513_2319570	1
chr1:10132642_2319571	1
chr1:10155548_2319575	1
chr1:10161218_2319581	1
chr1:10163010_2319582	1
chr1:10165625_2319583	1
chr1:10166256_2319584	1
chr1:10166463_2319588	1
chr1:10166588_2319590	1
chr1:10177523_2319596	1
chr1:10177596_2319597	1
chr1:10179599_2319598	1
chr1:10182032_2319599	1
chr1:10186861_2319604	1
chr1:10188504_2319606	1
chr1:10189450_2319607	1
chr1:10192448_2319610	1
chr1:10195055_2319611	1
chr1:10195151_2319612	1
chr1:10197135_2319614	1
chr1:10205114_2319618	1
chr1:10207021_2319620	1
chr1:10209270_2319622	1
chr1:10211395_2319623	1
chr1:10221201_2319631	1
chr1:10228199_2319636	1
chr1:10230805_2319638	1
chr1:10231253_2319639	1
chr1:10238743_2319644	1
chr1:10239480_2319647	1
chr1:10240015_2319650	1
chr1:10240044_2319651	1
chr1:10270903_2319667	1
chr1:10271725_2319669	1
chr1:10292420_2319674	1
chr1:10316327_2319678	1
chr1:10318566_2319679	1
chr1:10327456_2319683	1
chr1:10328228_2319685	1
chr1:10331560_2319687	1
chr1:10336380_2319694	1
chr1:10338045_2319695	1
chr1:10342408_2319700	1
chr1:10342489_2319701	1
chr1:10352110_2319705	1
chr1:10355735_2319709	1
chr1:10356647_2319710	1
chr1:10357009_2319711	1
chr1:10357234_2319712	1
chr1:10363230_2319717	1
chr1:10363383_2319718	1
chr1:10363496_2319719	1
chr1:10364607_2319720	1
chr1:10364778_2319721	1
chr1:10366920_2319723	1
chr1:10380130_2319724	1
chr1:10381828_2319726	1
chr1:10383955_2319728	1
chr1:10384865_2319730	1
chr1:10386243_2319731	1
chr1:10394591_2319736	1
chr1:10396741_2319737	1
chr1:10397157_2319738	1
chr1:10399828_2319741	1
chr1:10402114_2319743	1
chr1:10403290_2319746	1
chr1:10405949_2319752	1
chr1:10407843_2319753	1
chr1:10408707_2319754	1
chr1:10412690_2319758	1
chr1:10420987_2319764	1
chr1:10421791_2319766	1
chr1:10423341_2319767	1
chr1:10425177_2319768	1
chr1:10425498_2319772	1
chr1:10425607_2319774	1
chr1:10428525_2319776	1
chr1:10431200_2319778	1
chr1:10434945_2319781	1
chr1:10435332_2319782	1
chr1:10436606_2319783	1
chr1:10436661_2319784	1
chr1:10438401_2319785	1
chr1:10438683_2319786	1
chr1:10464285_2319810	1
chr1:10471498_2319815	1
chr1:10473180_2319819	1
chr1:10477508_2319825	1
chr1:10478906_2319826	1
chr1:10479548_2319827	1
chr1:10479879_2319830	1
chr1:10490594_2319834	1
chr1:10490838_2319835	1
chr1:10490942_2319836	1
chr1:10493969_2319841	1
chr1:10500404_2319846	1
chr1:10502463_2319849	1
chr1:10502499_2319850	1
chr1:10502586_2319851	1
chr1:10509813_2319853	1
chr1:10510149_2319854	1
chr1:10510311_2319856	1
chr1:10511474_2319858	1
chr1:10511660_2319861	1
chr1:10511772_2319862	1
chr1:10512061_2319864	1
chr1:10596270_2319901	1
chr1:10637895_2319918	1
chr1:10659307_2319925	1
chr1:10678389_2319931	1
chr1:10683092_2319933	1
chr1:10683183_2319934	1
chr1:10684397_2319935	1
chr1:10687331_2319937	1
chr1:10689632_2319939	1
chr1:10690012_2319941	1
chr1:10690197_2319942	1
chr1:11072698_2320050	1
chr1:11082947_2320066	1
chr1:11083470_2320069	1
chr1:11084428_2320074	1
chr1:11085179_2320077	1
chr1:11159778_2320170	1
chr1:11159890_2320171	1
chr1:11161862_2320173	1
chr1:11249397_2320189	1
chr1:11249664_2320190	1
chr1:11252328_2320191	1
chr1:11253684_2320193	1
chr1:11254521_2320194	1
chr1:11254584_2320195	1
chr1:11254919_2320197	1
chr1:11255337_2320198	1
chr1:11333290_2320211	1
chr1:11333402_2320212	1
chr1:11333947_2320213	1
chr1:11345708_2320215	1
chr1:11346063_2320216	1
chr1:11346684_2320217	1
chr1:11355000_2320219	1
chr1:11539223_2320273	1
chr1:11561245_2320277	1
chr1:11562788_2320278	1
chr1:11574454_2320282	1
chr1:11576075_2320284	1
chr1:11577537_2320285	1
chr1:11579780_2320287	1
chr1:11580797_2320289	1
chr1:11585233_2320291	1
chr1:11586740_2320292	1
chr1:11589920_2320295	1
chr1:11590967_2320297	1
chr1:11591640_2320298	1
chr1:11593746_2320299	1
chr1:11594466_2320300	1
chr1:11595068_2320303	1
chr1:11595556_2320306	1
chr1:11596389_2320308	1
chr1:11596688_2320309	1
chr1:11596753_2320310	1
chr1:11714432_2320348	1
chr1:11715449_2320350	1
chr1:11715897_2320353	1
chr1:11718422_2320356	1
chr1:11718484_2320357	1
chr1:11718610_2320358	1
chr1:11718795_2320359	1
chr1:11721216_2320363	1
chr1:11721300_2320364	1
chr1:11721690_2320366	1
chr1:11722413_2320367	1
chr1:11724184_2320375	1
chr1:11728860_2320377	1
chr1:11731331_2320378	1
chr1:11731996_2320380	1
chr1:11733334_2320381	1
chr1:11733700_2320382	1
chr1:11733783_2320383	1
chr1:11772422_2320404	1
chr1:11775177_2320405	1
chr1:11779653_2320407	1
chr1:11779798_2320408	1
chr1:11780325_2320409	1
chr1:11784408_2320410	1
chr1:11804594_2320415	1
chr1:11806213_2320420	1
chr1:11807516_2320421	1
chr1:11808502_2320423	1
chr1:11810136_2320424	1
chr1:11810299_2320425	1
chr1:11822097_2320433	1
chr1:11824405_2320434	1
chr1:11826094_2320437	1
chr1:11826824_2320439	1
chr1:11831598_2320444	1
chr1:11832159_2320445	1
chr1:11837212_2320448	1
chr1:11839016_2320450	1
chr1:11839878_2320451	1
chr1:11842252_2320452	1
chr1:11844280_2320453	1
chr1:11846765_2320459	1
chr1:11847473_2320460	1
chr1:11847685_2320461	1
chr1:11847979_2320462	1
chr1:11848301_2320464	1
chr1:11848745_2320465	1
chr1:11849327_2320467	1
chr1:11849589_2320468	1
chr1:11849985_2320469	1
chr1:11866370_2320476	1
chr1:11876672_2320483	1
chr1:11883780_2320494	1
chr1:11884557_2320495	1
chr1:11889295_2320502	1
chr1:11896044_2320515	1
chr1:11897451_2320519	1
chr1:11898411_2320520	1
chr1:11898600_2320521	1
chr1:11900203_2320524	1
chr1:11901806_2320526	1
chr1:11902794_2320528	1
chr1:11994744_2320583	1
chr1:11994878_2320584	1
chr1:12004629_2320588	1
chr1:12009833_2320590	1
chr1:12010415_2320592	1
chr1:12012705_2320594	1
chr1:12014651_2320596	1
chr1:12014887_2320597	1
chr1:12016974_2320598	1
chr1:12017178_2320599	1
chr1:12017915_2320600	1
chr1:12018577_2320601	1
chr1:12020735_2320602	1
chr1:12023605_2320603	1
chr1:12024240_2320605	1
chr1:12024725_2320606	1
chr1:12025543_2320609	1
chr1:12026318_2320610	1
chr1:12027044_2320612	1
chr1:12030731_2320613	1
chr1:12031976_2320614	1
chr1:12032951_2320615	1
chr1:12034722_2320616	1
chr1:12035040_2320617	1
chr1:12035374_2320618	1
chr1:12040408_2320620	1
chr1:12042033_2320623	1
chr1:12042581_2320624	1
chr1:12049232_2320625	1
chr1:12049369_2320626	1
chr1:12056230_2320632	1
chr1:12057354_2320633	1
chr1:12058827_2320635	1
chr1:12059059_2320636	1
chr1:12061464_2320638	1
chr1:12061850_2320639	1
chr1:12062069_2320641	1
chr1:12064049_2320643	1
chr1:12064568_2320644	1
chr1:12064882_2320645	1
chr1:12065787_2320646	1
chr1:12065948_2320647	1
chr1:12066595_2320648	1
chr1:12067161_2320649	1
chr1:12069672_2320650	1
chr1:12069708_2320651	1
chr1:12071554_2320652	1
chr1:12071740_2320653	1
chr1:12072342_2320654	1
chr1:12072902_2320655	1
chr1:12073439_2320656	1
chr1:12079397_2320658	1
chr1:12082182_2320661	1
chr1:12082908_2320662	1
chr1:12089142_2320663	1
chr1:12089357_2320666	1
chr1:12089822_2320667	1
chr1:12090087_2320669	1
chr1:12091621_2320674	1
chr1:12091885_2320677	1
chr1:12123437_2320684	1
chr1:12123622_2320685	1
chr1:12144521_2320694	1
chr1:12157179_2320696	1
chr1:12164474_2320697	1
chr1:12170126_2320701	1
chr1:12172045_2320702	1
chr1:12175675_2320703	1
chr1:12183357_2320706	1
chr1:12183784_2320707	1
chr1:12186022_2320709	1
chr1:12186240_2320710	1
chr1:12198381_2320718	1
chr1:12202349_2320719	1
chr1:12203411_2320720	1
chr1:12227098_2320728	1
chr1:12227149_2320729	1
chr1:12248877_2320735	1
chr1:12251014_2320736	1
chr1:12251091_2320737	1
chr1:12251838_2320738	1
chr1:12252490_2320740	1
chr1:12252932_2320742	1
chr1:12254023_2320744	1
chr1:12262073_2320749	1
chr1:12266830_2320751	1
chr1:12267009_2320752	1
chr1:12267636_2320753	1
chr1:12302615_2320768	1
chr1:12304327_2320770	1
chr1:12304371_2320771	1
chr1:12304595_2320775	1
chr1:12313792_2320786	1
chr1:12316402_2320790	1
chr1:12318065_2320793	1
chr1:12321015_2320796	1
chr1:12326950_2320798	1
chr1:12328804_2320800	1
chr1:12331087_2320801	1
chr1:12333064_2320802	1
chr1:12333122_2320803	1
chr1:12336258_2320804	1
chr1:12337986_2320805	1
chr1:12342774_2320807	1
chr1:12343218_2320810	1
chr1:12343461_2320811	1
chr1:12343618_2320813	1
chr1:12348289_2320814	1
chr1:12351094_2320815	1
chr1:12353601_2320816	1
chr1:12359268_2320817	1
chr1:12364647_2320819	1
chr1:12368509_2320821	1
chr1:12371524_2320823	1
chr1:12371874_2320824	1
chr1:12374230_2320825	1
chr1:12378156_2320827	1
chr1:12379554_2320828	1
chr1:12381869_2320830	1
chr1:12382617_2320831	1
chr1:12383789_2320835	1
chr1:12414059_2320838	1
chr1:12414198_2320839	1
chr1:12416002_2320841	1
chr1:12416462_2320844	1
chr1:12418536_2320846	1
chr1:12422786_2320848	1
chr1:12423177_2320850	1
chr1:12428534_2320852	1
chr1:12429537_2320853	1
chr1:12433827_2320854	1
chr1:12438482_2320856	1
chr1:12438548_2320857	1
chr1:12439543_2320858	1
chr1:12443091_2320860	1
chr1:12445338_2320861	1
chr1:12446325_2320862	1
chr1:12460266_2320865	1
chr1:12461664_2320866	1
chr1:12475163_2320869	1
chr1:12476740_2320870	1
chr1:12516098_2320881	1
chr1:12520256_2320884	1
chr1:12520317_2320885	1
chr1:12520423_2320886	1
chr1:12525063_2320892	1
chr1:12557564_2320912	1
chr1:12557648_2320913	1
chr1:12566927_2320916	1
chr1:12568963_2320918	1
chr1:12569633_2320919	1
chr1:12571003_2320920	1
chr1:12567644_2320925	1
chr1:12704594_2320961	1
chr1:12711165_2320965	1
chr1:12711228_2320966	1
chr1:12711290_2320967	1
chr1:12726003_2320969	1
chr1:12726279_2320971	1
chr1:12726508_2320972	1
chr1:12726641_2320974	1
chr1:12776276_2320983	1
chr1:12780890_2320990	1
chr1:12785349_2320993	1
chr1:12785901_2320995	1
chr1:12786019_2320996	1
chr1:12806229_2321013	1
chr1:12806402_2321014	1
chr1:12819288_2321017	1
chr1:12819435_2321018	1
chr1:12819789_2321019	1
chr1:12820621_2321020	1
chr1:12820665_2321021	1
chr1:12820712_2321022	1
chr1:12820769_2321023	1
chr1:12820903_2321025	1
chr1:12821104_2321027	1
chr1:12821948_2321028	1
chr1:12823479_2321029	1
chr1:12835058_2321033	1
chr1:12835728_2321034	1
chr1:12835823_2321035	1
chr1:12836203_2321036	1
chr1:12837171_2321037	1
chr1:12854869_2321044	1
chr1:12856672_2321049	1
chr1:12921103_2321068	1
chr1:13910302_2321195	1
chr1:13910542_2321197	1
chr1:13912005_2321198	1
chr1:13912096_2321199	1
chr1:13933703_2321203	1
chr1:13936899_2321204	1
chr1:13940464_2321207	1
chr1:13940726_2321208	1
chr1:13940919_2321210	1
chr1:13942533_2321214	1
chr1:13943586_2321215	1
chr1:14031289_2321242	1
chr1:14031609_2321243	1
chr1:14031879_2321244	1
chr1:14057525_2321252	1
chr1:14068524_2321254	1
chr1:14105409_2321277	1
chr1:14106288_2321278	1
chr1:14106531_2321279	1
chr1:14107087_2321280	1
chr1:14107607_2321282	1
chr1:14107918_2321283	1
chr1:14108779_2321284	1
chr1:14113171_2321288	1
chr1:14114213_2321289	1
chr1:14114361_2321290	1
chr1:14142923_2321301	1
chr1:14146465_2321302	1
chr1:14146743_2321303	1
chr1:14148512_2321304	1
chr1:14151286_2321307	1
chr1:14151361_2321308	1
chr1:14925479_2321470	1
chr1:14925560_2321471	1
chr1:15038994_2321490	1
chr1:15250629_2321524	1
chr1:15256214_2321526	1
chr1:15256340_2321527	1
chr1:15272459_2321537	1
chr1:15287243_2321542	1
chr1:15325768_2321556	1
chr1:15370492_2321564	1
chr1:15382600_2321568	1
chr1:15386698_2321571	1
chr1:15386864_2321572	1
chr1:15386907_2321573	1
chr1:15389001_2321575	1
chr1:15390072_2321576	1
chr1:15392169_2321578	1
chr1:15428048_2321614	1
chr1:15428153_2321615	1
chr1:15429877_2321616	1
chr1:15430532_2321617	1
chr1:15438945_2321621	1
chr1:15441001_2321623	1
chr1:15441195_2321624	1
chr1:15441427_2321625	1
chr1:15441634_2321626	1
chr1:15442654_2321628	1
chr1:15443233_2321630	1
chr1:15443674_2321631	1
chr1:15443855_2321632	1
chr1:15444324_2321634	1
chr1:15420712_2321638	1
chr1:15421346_2321640	1
chr1:15479095_2321646	1
chr1:15479347_2321647	1
chr1:15480175_2321648	1
chr1:15541419_2321652	1
chr1:15541775_2321654	1
chr1:15545844_2321656	1
chr1:15545924_2321658	1
chr1:15546068_2321659	1
chr1:15546454_2321660	1
chr1:15546921_2321661	1
chr1:15573725_2321673	1
chr1:15598828_2321676	1
chr1:15616014_2321686	1
chr1:15623205_2321691	1
chr1:15627716_2321692	1
chr1:15635150_2321694	1
chr1:15642932_2321700	1
chr1:15650973_2321703	1
chr1:15652613_2321705	1
chr1:15653144_2321706	1
chr1:15654793_2321708	1
chr1:15655154_2321709	1
chr1:15655854_2321710	1
chr1:15655911_2321711	1
chr1:15656177_2321713	1
chr1:15666009_2321714	1
chr1:15671579_2321717	1
chr1:15684353_2321726	1
chr1:15684647_2321727	1
chr1:15686975_2321729	1
chr1:15689146_2321730	1
chr1:15689186_2321731	1
chr1:15690467_2321732	1
chr1:15692324_2321733	1
chr1:15693991_2321734	1
chr1:15695923_2321736	1
chr1:15701001_2321738	1
chr1:15702103_2321739	1
chr1:15707199_2321742	1
chr1:15707258_2321743	1
chr1:15707744_2321744	1
chr1:15709702_2321748	1
chr1:15709863_2321750	1
chr1:15709921_2321751	1
chr1:15710308_2321752	1
chr1:15710629_2321754	1
chr1:15714557_2321756	1
chr1:15714853_2321757	1
chr1:15736619_2321781	1
chr1:15753650_2321785	1
chr1:15755093_2321788	1
chr1:15755286_2321789	1
chr1:15755717_2321790	1
chr1:15755915_2321791	1
chr1:15756080_2321792	1
chr1:15764961_2321798	1
chr1:15766815_2321800	1
chr1:15766996_2321801	1
chr1:15768956_2321802	1
chr1:15771104_2321808	1
chr1:15772114_2321810	1
chr1:15773153_2321812	1
chr1:15783599_2321816	1
chr1:15788077_2321817	1
chr1:15792494_2321824	1
chr1:15793883_2321826	1
chr1:15802956_2321830	1
chr1:15803000_2321831	1
chr1:15807613_2321832	1
chr1:15808145_2321833	1
chr1:15812430_2321837	1
chr1:15813791_2321838	1
chr1:15863056_2321855	1
chr1:15870929_2321856	1
chr1:15874786_2321859	1
chr1:15874839_2321860	1
chr1:15886045_2321862	1
chr1:15886626_2321863	1
chr1:15890426_2321866	1
chr1:15891771_2321869	1
chr1:15892741_2321873	1
chr1:15892920_2321874	1
chr1:15894704_2321878	1
chr1:15894778_2321879	1
chr1:15895341_2321881	1
chr1:15897129_2321884	1
chr1:15901265_2321890	1
chr1:15902072_2321893	1
chr1:15918768_2321894	1
chr1:15943976_2321912	1
chr1:15944226_2321914	1
chr1:15953164_2321916	1
chr1:15956837_2321917	1
chr1:15959935_2321918	1
chr1:15960117_2321919	1
chr1:15960495_2321921	1
chr1:15976220_2321925	1
chr1:15978224_2321926	1
chr1:15991998_2321934	1
chr1:15986383_2321944	1
chr1:15986712_2321946	1
chr1:15987932_2321948	1
chr1:15988090_2321949	1
chr1:16011064_2321963	1
chr1:16043209_2321968	1
chr1:16044400_2321969	1
chr1:16045040_2321970	1
chr1:16046264_2321971	1
chr1:16051853_2321977	1
chr1:16053651_2321978	1
chr1:16054021_2321979	1
chr1:16054240_2321981	1
chr1:16054601_2321982	1
chr1:16054762_2321984	1
chr1:16055190_2321986	1
chr1:16055600_2321988	1
chr1:16056324_2321989	1
chr1:16057028_2321990	1
chr1:16057687_2321991	1
chr1:16058447_2321993	1
chr1:16058900_2321994	1
chr1:16059138_2321995	1
chr1:16060302_2321998	1
chr1:16060430_2321999	1
chr1:16060552_2322000	1
chr1:16060726_2322001	1
chr1:16062890_2322008	1
chr1:16063134_2322010	1
chr1:16064436_2322013	1
chr1:16064605_2322014	1
chr1:16065130_2322016	1
chr1:16065744_2322018	1
chr1:16066068_2322019	1
chr1:16067080_2322020	1
chr1:16067488_2322021	1
chr1:16067815_2322023	1
chr1:16068723_2322026	1
chr1:16069102_2322027	1
chr1:16070830_2322031	1
chr1:16073389_2322032	1
chr1:16074055_2322034	1
chr1:16083109_2322037	1
chr1:16084744_2322038	1
chr1:16085184_2322040	1
chr1:16091004_2322044	1
chr1:16091569_2322047	1
chr1:16111113_2322060	1
chr1:16111223_2322061	1
chr1:16112612_2322062	1
chr1:16160670_2322092	1
chr1:16162810_2322094	1
chr1:16174359_2322104	1
chr1:16174584_2322105	1
chr1:16199315_2322108	1
chr1:16200405_2322109	1
chr1:16202809_2322110	1
chr1:16202979_2322111	1
chr1:16203052_2322112	1
chr1:16235838_2322120	1
chr1:16237650_2322122	1
chr1:16242656_2322124	1
chr1:16245442_2322125	1
chr1:16245937_2322126	1
chr1:16247367_2322127	1
chr1:16248750_2322128	1
chr1:16255069_2322132	1
chr1:16256871_2322133	1
chr1:16257134_2322134	1
chr1:16257395_2322135	1
chr1:16257723_2322136	1
chr1:16258290_2322137	1
chr1:16258791_2322138	1
chr1:16259071_2322139	1
chr1:16259255_2322140	1
chr1:16260588_2322141	1
chr1:16262027_2322142	1
chr1:16262188_2322144	1
chr1:16262326_2322145	1
chr1:16262518_2322146	1
chr1:16262601_2322147	1
chr1:16263779_2322149	1
chr1:16263900_2322150	1
chr1:16264097_2322151	1
chr1:16264357_2322152	1
chr1:16265241_2322154	1
chr1:16265802_2322156	1
chr1:16266072_2322157	1
chr1:16330843_2322213	1
chr1:16332461_2322214	1
chr1:16333280_2322219	1
chr1:16346559_2322228	1
chr1:16347538_2322229	1
chr1:16347812_2322230	1
chr1:16349152_2322234	1
chr1:16350323_2322235	1
chr1:16353843_2322241	1
chr1:16354524_2322243	1
chr1:16358962_2322257	1
chr1:16359693_2322258	1
chr1:16370995_2322269	1
chr1:16372138_2322270	1
chr1:16373075_2322271	1
chr1:16375309_2322276	1
chr1:16376327_2322279	1
chr1:16378211_2322284	1
[truncated: 3,370 more rows]
