# Supplementary material for: Dosage effect of Copy Number Variation in Epilepsy and ten regions of the human brain
Source: Research Square preprint supplement (doi:10.21203/rs.3.rs-6130694/v1), 2025-04-15
Supplement: Supplementary file 5 [file e812b45ab695a3a43033d746.xlsx]

## Sheet: SANAD chr1p36 region
Supplementary table 3. Association results in SANAD for chromosome 1p36. Association results for seizure phenotypes in SANAD in the chromosome 1p36 region.
Chromosome	Position	Phenotype	MAF	Beta	P-value	Genes	Consequence
1	1119858	drug_response	0.00353	1.07	0.192	TTLL10;TTLL10-AS1	upstream_gene_variant;downstream_gene_variant;intron_variant
1	1119858	headInjury	0.00353	1.36	0.577	TTLL10;TTLL10-AS1	upstream_gene_variant;downstream_gene_variant;intron_variant
1	1119858	learningdisability	0.00353	0.946	0.542	TTLL10;TTLL10-AS1	upstream_gene_variant;downstream_gene_variant;intron_variant
1	1119858	meningitisencephalitis	0.00353	-1240	0.414	TTLL10;TTLL10-AS1	upstream_gene_variant;downstream_gene_variant;intron_variant
1	1119858	neurologicaldeficit	0.00353	-1090	0.309	TTLL10;TTLL10-AS1	upstream_gene_variant;downstream_gene_variant;intron_variant
1	1119858	sez_freq	0.00353	134	1.43e-20	TTLL10;TTLL10-AS1	upstream_gene_variant;downstream_gene_variant;intron_variant
1	1119858	seztime	0.00353	150	0.492	TTLL10;TTLL10-AS1	upstream_gene_variant;downstream_gene_variant;intron_variant
1	1119858	total_sez_all_types	0.00353	4670	9.59e-19	TTLL10;TTLL10-AS1	upstream_gene_variant;downstream_gene_variant;intron_variant
1	1121794	drug_response	0.00648	0.568	0.481	TTLL10	downstream_gene_variant;intron_variant;intron_variant,NMD_transcript_variant
1	1121794	headInjury	0.00648	2.11	0.4	TTLL10	downstream_gene_variant;intron_variant;intron_variant,NMD_transcript_variant
1	1121794	learningdisability	0.00648	1.28	0.45	TTLL10	downstream_gene_variant;intron_variant;intron_variant,NMD_transcript_variant
1	1121794	meningitisencephalitis	0.00648	-4.93	0.00591	TTLL10	downstream_gene_variant;intron_variant;intron_variant,NMD_transcript_variant
1	1121794	neurologicaldeficit	0.00648	-0.171	0.936	TTLL10	downstream_gene_variant;intron_variant;intron_variant,NMD_transcript_variant
1	1121794	sez_freq	0.00648	118	1.62e-17	TTLL10	downstream_gene_variant;intron_variant;intron_variant,NMD_transcript_variant
1	1121794	seztime	0.00648	9.75	0.963	TTLL10	downstream_gene_variant;intron_variant;intron_variant,NMD_transcript_variant
1	1121794	total_sez_all_types	0.00648	4360	9.98e-18	TTLL10	downstream_gene_variant;intron_variant;intron_variant,NMD_transcript_variant
1	1135242	drug_response	0.0102	0.775	0.203	TNFRSF18;TTLL10	downstream_gene_variant
1	1135242	headInjury	0.0102	1.46	0.415	TNFRSF18;TTLL10	downstream_gene_variant
1	1135242	learningdisability	0.0102	1.19	0.326	TNFRSF18;TTLL10	downstream_gene_variant
1	1135242	meningitisencephalitis	0.0102	-4.43	0.0028	TNFRSF18;TTLL10	downstream_gene_variant
1	1135242	neurologicaldeficit	0.0102	-1.31	0.369	TNFRSF18;TTLL10	downstream_gene_variant
1	1135242	sez_freq	0.0102	71	1.17e-11	TNFRSF18;TTLL10	downstream_gene_variant
1	1135242	seztime	0.0102	-64.6	0.679	TNFRSF18;TTLL10	downstream_gene_variant
1	1135242	total_sez_all_types	0.0102	2460	1.48e-10	TNFRSF18;TTLL10	downstream_gene_variant
1	1152631	drug_response	0.00865	0.837	0.214	TNFRSF4;SDF4	upstream_gene_variant;3_prime_UTR_variant;3_prime_UTR_variant,NMD_transcript_variant;downstream_gene_variant;non_coding_transcript_exon_variant
1	1152631	headInjury	0.00865	1.06	0.604	TNFRSF4;SDF4	upstream_gene_variant;3_prime_UTR_variant;3_prime_UTR_variant,NMD_transcript_variant;downstream_gene_variant;non_coding_transcript_exon_variant
1	1152631	learningdisability	0.00865	1.19	0.363	TNFRSF4;SDF4	upstream_gene_variant;3_prime_UTR_variant;3_prime_UTR_variant,NMD_transcript_variant;downstream_gene_variant;non_coding_transcript_exon_variant
1	1152631	meningitisencephalitis	0.00865	-4.68	0.00389	TNFRSF4;SDF4	upstream_gene_variant;3_prime_UTR_variant;3_prime_UTR_variant,NMD_transcript_variant;downstream_gene_variant;non_coding_transcript_exon_variant
1	1152631	neurologicaldeficit	0.00865	-1.16	0.491	TNFRSF4;SDF4	upstream_gene_variant;3_prime_UTR_variant;3_prime_UTR_variant,NMD_transcript_variant;downstream_gene_variant;non_coding_transcript_exon_variant
1	1152631	sez_freq	0.00865	80.3	4.04e-12	TNFRSF4;SDF4	upstream_gene_variant;3_prime_UTR_variant;3_prime_UTR_variant,NMD_transcript_variant;downstream_gene_variant;non_coding_transcript_exon_variant
1	1152631	seztime	0.00865	-31.3	0.857	TNFRSF4;SDF4	upstream_gene_variant;3_prime_UTR_variant;3_prime_UTR_variant,NMD_transcript_variant;downstream_gene_variant;non_coding_transcript_exon_variant
1	1152631	total_sez_all_types	0.00865	2960	2.99e-12	TNFRSF4;SDF4	upstream_gene_variant;3_prime_UTR_variant;3_prime_UTR_variant,NMD_transcript_variant;downstream_gene_variant;non_coding_transcript_exon_variant
1	1156131	drug_response	0.00555	0.472	0.576	SDF4	upstream_gene_variant;intron_variant;intron_variant,NMD_transcript_variant;non_coding_transcript_exon_variant
1	1156131	headInjury	0.00555	-0.556	0.883	SDF4	upstream_gene_variant;intron_variant;intron_variant,NMD_transcript_variant;non_coding_transcript_exon_variant
1	1156131	learningdisability	0.00555	1.34	0.357	SDF4	upstream_gene_variant;intron_variant;intron_variant,NMD_transcript_variant;non_coding_transcript_exon_variant
1	1156131	meningitisencephalitis	0.00555	-5.1	0.375	SDF4	upstream_gene_variant;intron_variant;intron_variant,NMD_transcript_variant;non_coding_transcript_exon_variant
1	1156131	neurologicaldeficit	0.00555	-2.09	0.552	SDF4	upstream_gene_variant;intron_variant;intron_variant,NMD_transcript_variant;non_coding_transcript_exon_variant
1	1156131	sez_freq	0.00555	150	3.28e-24	SDF4	upstream_gene_variant;intron_variant;intron_variant,NMD_transcript_variant;non_coding_transcript_exon_variant
1	1156131	seztime	0.00555	103	0.648	SDF4	upstream_gene_variant;intron_variant;intron_variant,NMD_transcript_variant;non_coding_transcript_exon_variant
1	1156131	total_sez_all_types	0.00555	5180	2.27e-21	SDF4	upstream_gene_variant;intron_variant;intron_variant,NMD_transcript_variant;non_coding_transcript_exon_variant
1	1158277	drug_response	0.0269	0.487	0.221	SDF4	downstream_gene_variant;intron_variant;upstream_gene_variant;intron_variant,NMD_transcript_variant
1	1158277	headInjury	0.0269	-1.25	0.248	SDF4	downstream_gene_variant;intron_variant;upstream_gene_variant;intron_variant,NMD_transcript_variant
1	1158277	learningdisability	0.0269	-0.364	0.67	SDF4	downstream_gene_variant;intron_variant;upstream_gene_variant;intron_variant,NMD_transcript_variant
1	1158277	meningitisencephalitis	0.0269	-3.09	0.00446	SDF4	downstream_gene_variant;intron_variant;upstream_gene_variant;intron_variant,NMD_transcript_variant
1	1158277	neurologicaldeficit	0.0269	-0.234	0.807	SDF4	downstream_gene_variant;intron_variant;upstream_gene_variant;intron_variant,NMD_transcript_variant
1	1158277	sez_freq	0.0269	28.4	4.22e-05	SDF4	downstream_gene_variant;intron_variant;upstream_gene_variant;intron_variant,NMD_transcript_variant
1	1158277	seztime	0.0269	-39.4	0.7	SDF4	downstream_gene_variant;intron_variant;upstream_gene_variant;intron_variant,NMD_transcript_variant
1	1158277	total_sez_all_types	0.0269	1010	7.57e-05	SDF4	downstream_gene_variant;intron_variant;upstream_gene_variant;intron_variant,NMD_transcript_variant
1	1162435	drug_response	0.0313	0.23	0.519	SDF4	downstream_gene_variant;intron_variant;intron_variant,NMD_transcript_variant
1	1162435	headInjury	0.0313	-1.03	0.297	SDF4	downstream_gene_variant;intron_variant;intron_variant,NMD_transcript_variant
1	1162435	learningdisability	0.0313	-0.182	0.819	SDF4	downstream_gene_variant;intron_variant;intron_variant,NMD_transcript_variant
1	1162435	meningitisencephalitis	0.0313	-2.74	0.0053	SDF4	downstream_gene_variant;intron_variant;intron_variant,NMD_transcript_variant
1	1162435	neurologicaldeficit	0.0313	-0.356	0.673	SDF4	downstream_gene_variant;intron_variant;intron_variant,NMD_transcript_variant
1	1162435	sez_freq	0.0313	23.4	0.000188	SDF4	downstream_gene_variant;intron_variant;intron_variant,NMD_transcript_variant
1	1162435	seztime	0.0313	-14.7	0.874	SDF4	downstream_gene_variant;intron_variant;intron_variant,NMD_transcript_variant
1	1162435	total_sez_all_types	0.0313	822	0.000343	SDF4	downstream_gene_variant;intron_variant;intron_variant,NMD_transcript_variant
1	1163804	drug_response	0.0326	0.39	0.273	B3GALT6;SDF4	upstream_gene_variant;intron_variant,non_coding_transcript_variant;intron_variant;intron_variant,NMD_transcript_variant
1	1163804	headInjury	0.0326	-0.962	0.325	B3GALT6;SDF4	upstream_gene_variant;intron_variant,non_coding_transcript_variant;intron_variant;intron_variant,NMD_transcript_variant
1	1163804	learningdisability	0.0326	-0.109	0.89	B3GALT6;SDF4	upstream_gene_variant;intron_variant,non_coding_transcript_variant;intron_variant;intron_variant,NMD_transcript_variant
1	1163804	meningitisencephalitis	0.0326	-2.47	0.0172	B3GALT6;SDF4	upstream_gene_variant;intron_variant,non_coding_transcript_variant;intron_variant;intron_variant,NMD_transcript_variant
1	1163804	neurologicaldeficit	0.0326	-0.32	0.705	B3GALT6;SDF4	upstream_gene_variant;intron_variant,non_coding_transcript_variant;intron_variant;intron_variant,NMD_transcript_variant
1	1163804	sez_freq	0.0326	22.7	0.000257	B3GALT6;SDF4	upstream_gene_variant;intron_variant,non_coding_transcript_variant;intron_variant;intron_variant,NMD_transcript_variant
1	1163804	seztime	0.0326	-5.57	0.951	B3GALT6;SDF4	upstream_gene_variant;intron_variant,non_coding_transcript_variant;intron_variant;intron_variant,NMD_transcript_variant
1	1163804	total_sez_all_types	0.0326	800	0.000437	B3GALT6;SDF4	upstream_gene_variant;intron_variant,non_coding_transcript_variant;intron_variant;intron_variant,NMD_transcript_variant
1	1172907	drug_response	0.0334	0.422	0.224	FAM132A;B3GALT6	downstream_gene_variant
1	1172907	headInjury	0.0334	-0.936	0.308	FAM132A;B3GALT6	downstream_gene_variant
1	1172907	learningdisability	0.0334	-0.457	0.546	FAM132A;B3GALT6	downstream_gene_variant
1	1172907	meningitisencephalitis	0.0334	-2.88	0.00279	FAM132A;B3GALT6	downstream_gene_variant
1	1172907	neurologicaldeficit	0.0334	-0.672	0.376	FAM132A;B3GALT6	downstream_gene_variant
1	1172907	sez_freq	0.0334	21.8	0.000295	FAM132A;B3GALT6	downstream_gene_variant
1	1172907	seztime	0.0334	-17.2	0.847	FAM132A;B3GALT6	downstream_gene_variant
1	1172907	total_sez_all_types	0.0334	775	0.000465	FAM132A;B3GALT6	downstream_gene_variant
1	1176597	drug_response	0.0308	0.469	0.202	FAM132A	downstream_gene_variant
1	1176597	headInjury	0.0308	-0.965	0.329	FAM132A	downstream_gene_variant
1	1176597	learningdisability	0.0308	-0.189	0.815	FAM132A	downstream_gene_variant
1	1176597	meningitisencephalitis	0.0308	-2.82	0.00365	FAM132A	downstream_gene_variant
1	1176597	neurologicaldeficit	0.0308	-0.322	0.709	FAM132A	downstream_gene_variant
1	1176597	sez_freq	0.0308	24.7	0.000115	FAM132A	downstream_gene_variant
1	1176597	seztime	0.0308	-30.7	0.745	FAM132A	downstream_gene_variant
1	1176597	total_sez_all_types	0.0308	880	0.000175	FAM132A	downstream_gene_variant
1	1192515	drug_response	0.018	0.52	0.271	UBE2J2	upstream_gene_variant;downstream_gene_variant;splice_region_variant,intron_variant,NMD_transcript_variant;splice_region_variant,intron_variant,non_coding_transcript_variant;splice_region_variant,intron_variant
1	1192515	headInjury	0.018	1.87	0.192	UBE2J2	upstream_gene_variant;downstream_gene_variant;splice_region_variant,intron_variant,NMD_transcript_variant;splice_region_variant,intron_variant,non_coding_transcript_variant;splice_region_variant,intron_variant
1	1192515	learningdisability	0.018	0.525	0.6	UBE2J2	upstream_gene_variant;downstream_gene_variant;splice_region_variant,intron_variant,NMD_transcript_variant;splice_region_variant,intron_variant,non_coding_transcript_variant;splice_region_variant,intron_variant
1	1192515	meningitisencephalitis	0.018	-3.68	0.00376	UBE2J2	upstream_gene_variant;downstream_gene_variant;splice_region_variant,intron_variant,NMD_transcript_variant;splice_region_variant,intron_variant,non_coding_transcript_variant;splice_region_variant,intron_variant
1	1192515	neurologicaldeficit	0.018	-1.31	0.254	UBE2J2	upstream_gene_variant;downstream_gene_variant;splice_region_variant,intron_variant,NMD_transcript_variant;splice_region_variant,intron_variant,non_coding_transcript_variant;splice_region_variant,intron_variant
1	1192515	sez_freq	0.018	42	4.08e-07	UBE2J2	upstream_gene_variant;downstream_gene_variant;splice_region_variant,intron_variant,NMD_transcript_variant;splice_region_variant,intron_variant,non_coding_transcript_variant;splice_region_variant,intron_variant
1	1192515	seztime	0.018	-78.1	0.525	UBE2J2	upstream_gene_variant;downstream_gene_variant;splice_region_variant,intron_variant,NMD_transcript_variant;splice_region_variant,intron_variant,non_coding_transcript_variant;splice_region_variant,intron_variant
1	1192515	total_sez_all_types	0.018	1500	7.65e-07	UBE2J2	upstream_gene_variant;downstream_gene_variant;splice_region_variant,intron_variant,NMD_transcript_variant;splice_region_variant,intron_variant,non_coding_transcript_variant;splice_region_variant,intron_variant
1	1194804	drug_response	0.0222	0.404	0.349	UBE2J2	upstream_gene_variant;intron_variant,non_coding_transcript_variant;downstream_gene_variant;intron_variant;intron_variant,NMD_transcript_variant
1	1194804	headInjury	0.0222	1.35	0.316	UBE2J2	upstream_gene_variant;intron_variant,non_coding_transcript_variant;downstream_gene_variant;intron_variant;intron_variant,NMD_transcript_variant
1	1194804	learningdisability	0.0222	0.51	0.591	UBE2J2	upstream_gene_variant;intron_variant,non_coding_transcript_variant;downstream_gene_variant;intron_variant;intron_variant,NMD_transcript_variant
1	1194804	meningitisencephalitis	0.0222	-3.24	0.00595	UBE2J2	upstream_gene_variant;intron_variant,non_coding_transcript_variant;downstream_gene_variant;intron_variant;intron_variant,NMD_transcript_variant
1	1194804	neurologicaldeficit	0.0222	-1.05	0.315	UBE2J2	upstream_gene_variant;intron_variant,non_coding_transcript_variant;downstream_gene_variant;intron_variant;intron_variant,NMD_transcript_variant
1	1194804	sez_freq	0.0222	34.6	5.26e-06	UBE2J2	upstream_gene_variant;intron_variant,non_coding_transcript_variant;downstream_gene_variant;intron_variant;intron_variant,NMD_transcript_variant
1	1194804	seztime	0.0222	-52.4	0.641	UBE2J2	upstream_gene_variant;intron_variant,non_coding_transcript_variant;downstream_gene_variant;intron_variant;intron_variant,NMD_transcript_variant
1	1194804	total_sez_all_types	0.0222	1240	8.94e-06	UBE2J2	upstream_gene_variant;intron_variant,non_coding_transcript_variant;downstream_gene_variant;intron_variant;intron_variant,NMD_transcript_variant
1	1211292	drug_response	0.0183	0.335	0.453	RP5-902P8.10;SCNN1D;UBE2J2	upstream_gene_variant;intron_variant,non_coding_transcript_variant
1	1211292	headInjury	0.0183	1.57	0.256	RP5-902P8.10;SCNN1D;UBE2J2	upstream_gene_variant;intron_variant,non_coding_transcript_variant
1	1211292	learningdisability	0.0183	0.522	0.595	RP5-902P8.10;SCNN1D;UBE2J2	upstream_gene_variant;intron_variant,non_coding_transcript_variant
1	1211292	meningitisencephalitis	0.0183	-3.46	0.00381	RP5-902P8.10;SCNN1D;UBE2J2	upstream_gene_variant;intron_variant,non_coding_transcript_variant
1	1211292	neurologicaldeficit	0.0183	-1.09	0.301	RP5-902P8.10;SCNN1D;UBE2J2	upstream_gene_variant;intron_variant,non_coding_transcript_variant
1	1211292	sez_freq	0.0183	35.6	5.79e-06	RP5-902P8.10;SCNN1D;UBE2J2	upstream_gene_variant;intron_variant,non_coding_transcript_variant
1	1211292	seztime	0.0183	14.1	0.904	RP5-902P8.10;SCNN1D;UBE2J2	upstream_gene_variant;intron_variant,non_coding_transcript_variant
1	1211292	total_sez_all_types	0.0183	1310	5.39e-06	RP5-902P8.10;SCNN1D;UBE2J2	upstream_gene_variant;intron_variant,non_coding_transcript_variant
1	1242084	drug_response	0.022	0.264	0.545	PUSL1;CPSF3L;ACAP3	upstream_gene_variant;intron_variant,non_coding_transcript_variant;downstream_gene_variant;intron_variant;intron_variant,NMD_transcript_variant
1	1242084	headInjury	0.022	1.36	0.323	PUSL1;CPSF3L;ACAP3	upstream_gene_variant;intron_variant,non_coding_transcript_variant;downstream_gene_variant;intron_variant;intron_variant,NMD_transcript_variant
1	1242084	learningdisability	0.022	0.5	0.604	PUSL1;CPSF3L;ACAP3	upstream_gene_variant;intron_variant,non_coding_transcript_variant;downstream_gene_variant;intron_variant;intron_variant,NMD_transcript_variant
1	1242084	meningitisencephalitis	0.022	-3.37	0.00517	PUSL1;CPSF3L;ACAP3	upstream_gene_variant;intron_variant,non_coding_transcript_variant;downstream_gene_variant;intron_variant;intron_variant,NMD_transcript_variant
1	1242084	neurologicaldeficit	0.022	-0.946	0.374	PUSL1;CPSF3L;ACAP3	upstream_gene_variant;intron_variant,non_coding_transcript_variant;downstream_gene_variant;intron_variant;intron_variant,NMD_transcript_variant
1	1242084	sez_freq	0.022	35	5.58e-06	PUSL1;CPSF3L;ACAP3	upstream_gene_variant;intron_variant,non_coding_transcript_variant;downstream_gene_variant;intron_variant;intron_variant,NMD_transcript_variant
1	1242084	seztime	0.022	38	0.739	PUSL1;CPSF3L;ACAP3	upstream_gene_variant;intron_variant,non_coding_transcript_variant;downstream_gene_variant;intron_variant;intron_variant,NMD_transcript_variant
1	1242084	total_sez_all_types	0.022	1260	7.97e-06	PUSL1;CPSF3L;ACAP3	upstream_gene_variant;intron_variant,non_coding_transcript_variant;downstream_gene_variant;intron_variant;intron_variant,NMD_transcript_variant
1	1310924	drug_response	0.0169	0.407	0.384	RP5-890O3.3;AURKAIP1	upstream_gene_variant
1	1310924	headInjury	0.0169	1.1	0.462	RP5-890O3.3;AURKAIP1	upstream_gene_variant
1	1310924	learningdisability	0.0169	0.219	0.832	RP5-890O3.3;AURKAIP1	upstream_gene_variant
1	1310924	meningitisencephalitis	0.0169	-3.63	0.00287	RP5-890O3.3;AURKAIP1	upstream_gene_variant
1	1310924	neurologicaldeficit	0.0169	-0.551	0.63	RP5-890O3.3;AURKAIP1	upstream_gene_variant
1	1310924	sez_freq	0.0169	39.6	1.4e-06	RP5-890O3.3;AURKAIP1	upstream_gene_variant
1	1310924	seztime	0.0169	-27.3	0.822	RP5-890O3.3;AURKAIP1	upstream_gene_variant
1	1310924	total_sez_all_types	0.0169	1450	1.46e-06	RP5-890O3.3;AURKAIP1	upstream_gene_variant
1	1314015	drug_response	0.0215	0.319	0.43	RP5-890O3.3;AURKAIP1	upstream_gene_variant
1	1314015	headInjury	0.0215	-0.222	0.856	RP5-890O3.3;AURKAIP1	upstream_gene_variant
1	1314015	learningdisability	0.0215	-0.252	0.776	RP5-890O3.3;AURKAIP1	upstream_gene_variant
1	1314015	meningitisencephalitis	0.0215	-3.13	0.00661	RP5-890O3.3;AURKAIP1	upstream_gene_variant
1	1314015	neurologicaldeficit	0.0215	0.0642	0.95	RP5-890O3.3;AURKAIP1	upstream_gene_variant
1	1314015	sez_freq	0.0215	29.7	3.09e-05	RP5-890O3.3;AURKAIP1	upstream_gene_variant
1	1314015	seztime	0.0215	12.9	0.902	RP5-890O3.3;AURKAIP1	upstream_gene_variant
1	1314015	total_sez_all_types	0.0215	1090	2.88e-05	RP5-890O3.3;AURKAIP1	upstream_gene_variant
1	1425700	drug_response	0.0253	0.237	0.536	ATAD3B	non_coding_transcript_exon_variant;missense_variant
1	1425700	headInjury	0.0253	0.0781	0.949	ATAD3B	non_coding_transcript_exon_variant;missense_variant
1	1425700	learningdisability	0.0253	0.241	0.773	ATAD3B	non_coding_transcript_exon_variant;missense_variant
1	1425700	meningitisencephalitis	0.0253	-3.08	0.00659	ATAD3B	non_coding_transcript_exon_variant;missense_variant
1	1425700	neurologicaldeficit	0.0253	0.135	0.888	ATAD3B	non_coding_transcript_exon_variant;missense_variant
1	1425700	sez_freq	0.0253	22.8	0.000837	ATAD3B	non_coding_transcript_exon_variant;missense_variant
1	1425700	seztime	0.0253	20	0.842	ATAD3B	non_coding_transcript_exon_variant;missense_variant
1	1425700	total_sez_all_types	0.0253	950	0.000139	ATAD3B	non_coding_transcript_exon_variant;missense_variant
1	1462766	drug_response	0.0269	0.301	0.419	ATAD3A	downstream_gene_variant;intron_variant
1	1462766	headInjury	0.0269	-0.663	0.559	ATAD3A	downstream_gene_variant;intron_variant
1	1462766	learningdisability	0.0269	0.217	0.788	ATAD3A	downstream_gene_variant;intron_variant
1	1462766	meningitisencephalitis	0.0269	-2.9	0.00933	ATAD3A	downstream_gene_variant;intron_variant
1	1462766	neurologicaldeficit	0.0269	0.147	0.874	ATAD3A	downstream_gene_variant;intron_variant
1	1462766	sez_freq	0.0269	21.5	0.00112	ATAD3A	downstream_gene_variant;intron_variant
1	1462766	seztime	0.0269	22	0.821	ATAD3A	downstream_gene_variant;intron_variant
1	1462766	total_sez_all_types	0.0269	892	0.000226	ATAD3A	downstream_gene_variant;intron_variant
1	1478180	drug_response	0.0177	0.331	0.478	SSU72;TMEM240	downstream_gene_variant;intron_variant,non_coding_transcript_variant;intron_variant;upstream_gene_variant
1	1478180	headInjury	0.0177	0.477	0.736	SSU72;TMEM240	downstream_gene_variant;intron_variant,non_coding_transcript_variant;intron_variant;upstream_gene_variant
1	1478180	learningdisability	0.0177	-0.0113	0.992	SSU72;TMEM240	downstream_gene_variant;intron_variant,non_coding_transcript_variant;intron_variant;upstream_gene_variant
1	1478180	meningitisencephalitis	0.0177	-3.18	0.0138	SSU72;TMEM240	downstream_gene_variant;intron_variant,non_coding_transcript_variant;intron_variant;upstream_gene_variant
1	1478180	neurologicaldeficit	0.0177	0.151	0.889	SSU72;TMEM240	downstream_gene_variant;intron_variant,non_coding_transcript_variant;intron_variant;upstream_gene_variant
1	1478180	sez_freq	0.0177	35.9	1.34e-05	SSU72;TMEM240	downstream_gene_variant;intron_variant,non_coding_transcript_variant;intron_variant;upstream_gene_variant
1	1478180	seztime	0.0177	32.9	0.787	SSU72;TMEM240	downstream_gene_variant;intron_variant,non_coding_transcript_variant;intron_variant;upstream_gene_variant
1	1478180	total_sez_all_types	0.0177	1400	3.47e-06	SSU72;TMEM240	downstream_gene_variant;intron_variant,non_coding_transcript_variant;intron_variant;upstream_gene_variant
1	1485984	drug_response	0.0222	0.615	0.139	SSU72	intron_variant,non_coding_transcript_variant;intron_variant;upstream_gene_variant
1	1485984	headInjury	0.0222	0.793	0.526	SSU72	intron_variant,non_coding_transcript_variant;intron_variant;upstream_gene_variant
1	1485984	learningdisability	0.0222	0.776	0.324	SSU72	intron_variant,non_coding_transcript_variant;intron_variant;upstream_gene_variant
1	1485984	meningitisencephalitis	0.0222	-4.13	0.00228	SSU72	intron_variant,non_coding_transcript_variant;intron_variant;upstream_gene_variant
1	1485984	neurologicaldeficit	0.0222	0.106	0.92	SSU72	intron_variant,non_coding_transcript_variant;intron_variant;upstream_gene_variant
1	1485984	sez_freq	0.0222	28	0.000136	SSU72	intron_variant,non_coding_transcript_variant;intron_variant;upstream_gene_variant
1	1485984	seztime	0.0222	-72.3	0.505	SSU72	intron_variant,non_coding_transcript_variant;intron_variant;upstream_gene_variant
1	1485984	total_sez_all_types	0.0222	1150	1.9e-05	SSU72	intron_variant,non_coding_transcript_variant;intron_variant;upstream_gene_variant
1	1486834	drug_response	0.00409	-0.0676	0.949	SSU72	intron_variant,non_coding_transcript_variant;intron_variant;upstream_gene_variant
1	1486834	headInjury	0.00409	0.788	0.891	SSU72	intron_variant,non_coding_transcript_variant;intron_variant;upstream_gene_variant
1	1486834	learningdisability	0.00409	-2.36	0.276	SSU72	intron_variant,non_coding_transcript_variant;intron_variant;upstream_gene_variant
1	1486834	meningitisencephalitis	0.00409	0.636	0.865	SSU72	intron_variant,non_coding_transcript_variant;intron_variant;upstream_gene_variant
1	1486834	neurologicaldeficit	0.00409	-1.36	0.472	SSU72	intron_variant,non_coding_transcript_variant;intron_variant;upstream_gene_variant
1	1486834	sez_freq	0.00409	215	7.81e-32	SSU72	intron_variant,non_coding_transcript_variant;intron_variant;upstream_gene_variant
1	1486834	seztime	0.00409	226	0.426	SSU72	intron_variant,non_coding_transcript_variant;intron_variant;upstream_gene_variant
1	1486834	total_sez_all_types	0.00409	7860	1.4e-31	SSU72	intron_variant,non_coding_transcript_variant;intron_variant;upstream_gene_variant
1	1493727	drug_response	0.00623	0.56	0.637	SSU72;AL645728.2	downstream_gene_variant;intron_variant,non_coding_transcript_variant;intron_variant
1	1493727	headInjury	0.00623	1.07	0.852	SSU72;AL645728.2	downstream_gene_variant;intron_variant,non_coding_transcript_variant;intron_variant
1	1493727	learningdisability	0.00623	-2.38	0.347	SSU72;AL645728.2	downstream_gene_variant;intron_variant,non_coding_transcript_variant;intron_variant
1	1493727	meningitisencephalitis	0.00623	1.02	0.775	SSU72;AL645728.2	downstream_gene_variant;intron_variant,non_coding_transcript_variant;intron_variant
1	1493727	neurologicaldeficit	0.00623	-0.908	0.657	SSU72;AL645728.2	downstream_gene_variant;intron_variant,non_coding_transcript_variant;intron_variant
1	1493727	sez_freq	0.00623	249	7.96e-37	SSU72;AL645728.2	downstream_gene_variant;intron_variant,non_coding_transcript_variant;intron_variant
1	1493727	seztime	0.00623	236	0.442	SSU72;AL645728.2	downstream_gene_variant;intron_variant,non_coding_transcript_variant;intron_variant
1	1493727	total_sez_all_types	0.00623	9210	1.13e-37	SSU72;AL645728.2	downstream_gene_variant;intron_variant,non_coding_transcript_variant;intron_variant
1	1497824	drug_response	0.0042	0.0116	0.992	SSU72;AL645728.2	3_prime_UTR_variant;intron_variant,non_coding_transcript_variant;intron_variant;non_coding_transcript_exon_variant
1	1497824	headInjury	0.0042	0.0685	0.991	SSU72;AL645728.2	3_prime_UTR_variant;intron_variant,non_coding_transcript_variant;intron_variant;non_coding_transcript_exon_variant
1	1497824	learningdisability	0.0042	-1.34	0.716	SSU72;AL645728.2	3_prime_UTR_variant;intron_variant,non_coding_transcript_variant;intron_variant;non_coding_transcript_exon_variant
1	1497824	meningitisencephalitis	0.0042	0.529	0.889	SSU72;AL645728.2	3_prime_UTR_variant;intron_variant,non_coding_transcript_variant;intron_variant;non_coding_transcript_exon_variant
1	1497824	neurologicaldeficit	0.0042	0.0245	0.992	SSU72;AL645728.2	3_prime_UTR_variant;intron_variant,non_coding_transcript_variant;intron_variant;non_coding_transcript_exon_variant
1	1497824	sez_freq	0.0042	260	5.25e-38	SSU72;AL645728.2	3_prime_UTR_variant;intron_variant,non_coding_transcript_variant;intron_variant;non_coding_transcript_exon_variant
1	1497824	seztime	0.0042	284	0.369	SSU72;AL645728.2	3_prime_UTR_variant;intron_variant,non_coding_transcript_variant;intron_variant;non_coding_transcript_exon_variant
1	1497824	total_sez_all_types	0.0042	9590	1.41e-38	SSU72;AL645728.2	3_prime_UTR_variant;intron_variant,non_coding_transcript_variant;intron_variant;non_coding_transcript_exon_variant
1	1505255	drug_response	0.00629	0.958	0.477	SSU72	intron_variant,non_coding_transcript_variant;intron_variant
1	1505255	headInjury	0.00629	0.676	0.914	SSU72	intron_variant,non_coding_transcript_variant;intron_variant
1	1505255	learningdisability	0.00629	-1.93	0.573	SSU72	intron_variant,non_coding_transcript_variant;intron_variant
1	1505255	meningitisencephalitis	0.00629	0.192	0.965	SSU72	intron_variant,non_coding_transcript_variant;intron_variant
1	1505255	neurologicaldeficit	0.00629	-0.648	0.79	SSU72	intron_variant,non_coding_transcript_variant;intron_variant
1	1505255	sez_freq	0.00629	305	2.46e-46	SSU72	intron_variant,non_coding_transcript_variant;intron_variant
1	1505255	seztime	0.00629	139	0.682	SSU72	intron_variant,non_coding_transcript_variant;intron_variant
1	1505255	total_sez_all_types	0.00629	11300	4.43e-47	SSU72	intron_variant,non_coding_transcript_variant;intron_variant
1	1509034	drug_response	0.00932	0.68	0.501	AL645728.1;SSU72	upstream_gene_variant;intron_variant,non_coding_transcript_variant;intron_variant
1	1509034	headInjury	0.00932	-1.14	0.738	AL645728.1;SSU72	upstream_gene_variant;intron_variant,non_coding_transcript_variant;intron_variant
1	1509034	learningdisability	0.00932	-4.08	0.249	AL645728.1;SSU72	upstream_gene_variant;intron_variant,non_coding_transcript_variant;intron_variant
1	1509034	meningitisencephalitis	0.00932	-0.833	0.839	AL645728.1;SSU72	upstream_gene_variant;intron_variant,non_coding_transcript_variant;intron_variant
1	1509034	neurologicaldeficit	0.00932	-2.27	0.406	AL645728.1;SSU72	upstream_gene_variant;intron_variant,non_coding_transcript_variant;intron_variant
1	1509034	sez_freq	0.00932	188	1.49e-27	AL645728.1;SSU72	upstream_gene_variant;intron_variant,non_coding_transcript_variant;intron_variant
1	1509034	seztime	0.00932	88.7	0.738	AL645728.1;SSU72	upstream_gene_variant;intron_variant,non_coding_transcript_variant;intron_variant
1	1509034	total_sez_all_types	0.00932	6760	1.64e-26	AL645728.1;SSU72	upstream_gene_variant;intron_variant,non_coding_transcript_variant;intron_variant
1	1620860	drug_response	0.0454	0.0992	0.775	SLC35E2B	intron_variant,non_coding_transcript_variant;intron_variant
1	1620860	headInjury	0.0454	0.0672	0.944	SLC35E2B	intron_variant,non_coding_transcript_variant;intron_variant
1	1620860	learningdisability	0.0454	0.111	0.905	SLC35E2B	intron_variant,non_coding_transcript_variant;intron_variant
1	1620860	meningitisencephalitis	0.0454	0.292	0.837	SLC35E2B	intron_variant,non_coding_transcript_variant;intron_variant
1	1620860	neurologicaldeficit	0.0454	0.96	0.171	SLC35E2B	intron_variant,non_coding_transcript_variant;intron_variant
1	1620860	sez_freq	0.0454	22.5	0.000187	SLC35E2B	intron_variant,non_coding_transcript_variant;intron_variant
1	1620860	seztime	0.0454	-4.71	0.958	SLC35E2B	intron_variant,non_coding_transcript_variant;intron_variant
1	1620860	total_sez_all_types	0.0454	748	0.000717	SLC35E2B	intron_variant,non_coding_transcript_variant;intron_variant
1	1638005	drug_response	0.059	-0.000977	0.997	RP1-283E3.8;CDK11A;MMP23A	upstream_gene_variant;intron_variant,non_coding_transcript_variant;downstream_gene_variant;intron_variant;intron_variant,NMD_transcript_variant
1	1638005	headInjury	0.059	0.515	0.545	RP1-283E3.8;CDK11A;MMP23A	upstream_gene_variant;intron_variant,non_coding_transcript_variant;downstream_gene_variant;intron_variant;intron_variant,NMD_transcript_variant
1	1638005	learningdisability	0.059	0.736	0.355	RP1-283E3.8;CDK11A;MMP23A	upstream_gene_variant;intron_variant,non_coding_transcript_variant;downstream_gene_variant;intron_variant;intron_variant,NMD_transcript_variant
1	1638005	meningitisencephalitis	0.059	0.547	0.645	RP1-283E3.8;CDK11A;MMP23A	upstream_gene_variant;intron_variant,non_coding_transcript_variant;downstream_gene_variant;intron_variant;intron_variant,NMD_transcript_variant
1	1638005	neurologicaldeficit	0.059	0.51	0.41	RP1-283E3.8;CDK11A;MMP23A	upstream_gene_variant;intron_variant,non_coding_transcript_variant;downstream_gene_variant;intron_variant;intron_variant,NMD_transcript_variant
1	1638005	sez_freq	0.059	15	0.00256	RP1-283E3.8;CDK11A;MMP23A	upstream_gene_variant;intron_variant,non_coding_transcript_variant;downstream_gene_variant;intron_variant;intron_variant,NMD_transcript_variant
1	1638005	seztime	0.059	-28.7	0.695	RP1-283E3.8;CDK11A;MMP23A	upstream_gene_variant;intron_variant,non_coding_transcript_variant;downstream_gene_variant;intron_variant;intron_variant,NMD_transcript_variant
1	1638005	total_sez_all_types	0.059	502	0.00587	RP1-283E3.8;CDK11A;MMP23A	upstream_gene_variant;intron_variant,non_coding_transcript_variant;downstream_gene_variant;intron_variant;intron_variant,NMD_transcript_variant
1	1645366	drug_response	0.0248	-0.506	0.304	RP1-283E3.8;CDK11A	intron_variant,non_coding_transcript_variant;downstream_gene_variant;intron_variant;intron_variant,NMD_transcript_variant
1	1645366	headInjury	0.0248	2.11	0.257	RP1-283E3.8;CDK11A	intron_variant,non_coding_transcript_variant;downstream_gene_variant;intron_variant;intron_variant,NMD_transcript_variant
1	1645366	learningdisability	0.0248	1.37	0.366	RP1-283E3.8;CDK11A	intron_variant,non_coding_transcript_variant;downstream_gene_variant;intron_variant;intron_variant,NMD_transcript_variant
1	1645366	meningitisencephalitis	0.0248	1.1	0.606	RP1-283E3.8;CDK11A	intron_variant,non_coding_transcript_variant;downstream_gene_variant;intron_variant;intron_variant,NMD_transcript_variant
1	1645366	neurologicaldeficit	0.0248	-0.211	0.844	RP1-283E3.8;CDK11A	intron_variant,non_coding_transcript_variant;downstream_gene_variant;intron_variant;intron_variant,NMD_transcript_variant
1	1645366	sez_freq	0.0248	47.1	6.25e-08	RP1-283E3.8;CDK11A	intron_variant,non_coding_transcript_variant;downstream_gene_variant;intron_variant;intron_variant,NMD_transcript_variant
1	1645366	seztime	0.0248	71.8	0.578	RP1-283E3.8;CDK11A	intron_variant,non_coding_transcript_variant;downstream_gene_variant;intron_variant;intron_variant,NMD_transcript_variant
1	1645366	total_sez_all_types	0.0248	1620	4.09e-07	RP1-283E3.8;CDK11A	intron_variant,non_coding_transcript_variant;downstream_gene_variant;intron_variant;intron_variant,NMD_transcript_variant
1	1671782	drug_response	0.0502	-0.129	0.686	SLC35E2;RP1-283E3.8;RP1-283E3.4	downstream_gene_variant;intron_variant;upstream_gene_variant
1	1671782	headInjury	0.0502	1.83	0.158	SLC35E2;RP1-283E3.8;RP1-283E3.4	downstream_gene_variant;intron_variant;upstream_gene_variant
1	1671782	learningdisability	0.0502	1.03	0.292	SLC35E2;RP1-283E3.8;RP1-283E3.4	downstream_gene_variant;intron_variant;upstream_gene_variant
1	1671782	meningitisencephalitis	0.0502	0.457	0.732	SLC35E2;RP1-283E3.8;RP1-283E3.4	downstream_gene_variant;intron_variant;upstream_gene_variant
1	1671782	neurologicaldeficit	0.0502	0.216	0.759	SLC35E2;RP1-283E3.8;RP1-283E3.4	downstream_gene_variant;intron_variant;upstream_gene_variant
1	1671782	sez_freq	0.0502	20.3	0.000298	SLC35E2;RP1-283E3.8;RP1-283E3.4	downstream_gene_variant;intron_variant;upstream_gene_variant
1	1671782	seztime	0.0502	43.1	0.602	SLC35E2;RP1-283E3.8;RP1-283E3.4	downstream_gene_variant;intron_variant;upstream_gene_variant
1	1671782	total_sez_all_types	0.0502	701	0.000652	SLC35E2;RP1-283E3.8;RP1-283E3.4	downstream_gene_variant;intron_variant;upstream_gene_variant
1	1706136	drug_response	0.0402	0.429	0.292	NADK	intron_variant,non_coding_transcript_variant;downstream_gene_variant;intron_variant
1	1706136	headInjury	0.0402	0.506	0.708	NADK	intron_variant,non_coding_transcript_variant;downstream_gene_variant;intron_variant
1	1706136	learningdisability	0.0402	-1.22	0.144	NADK	intron_variant,non_coding_transcript_variant;downstream_gene_variant;intron_variant
1	1706136	meningitisencephalitis	0.0402	-1.2	0.297	NADK	intron_variant,non_coding_transcript_variant;downstream_gene_variant;intron_variant
1	1706136	neurologicaldeficit	0.0402	-0.652	0.418	NADK	intron_variant,non_coding_transcript_variant;downstream_gene_variant;intron_variant
1	1706136	sez_freq	0.0402	31.9	5.65e-06	NADK	intron_variant,non_coding_transcript_variant;downstream_gene_variant;intron_variant
1	1706136	seztime	0.0402	11.3	0.913	NADK	intron_variant,non_coding_transcript_variant;downstream_gene_variant;intron_variant
1	1706136	total_sez_all_types	0.0402	1210	2.54e-06	NADK	intron_variant,non_coding_transcript_variant;downstream_gene_variant;intron_variant
1	1706160	drug_response	0.0352	0.161	0.695	NADK	intron_variant,non_coding_transcript_variant;downstream_gene_variant;intron_variant
1	1706160	headInjury	0.0352	0.381	0.784	NADK	intron_variant,non_coding_transcript_variant;downstream_gene_variant;intron_variant
1	1706160	learningdisability	0.0352	-1.4	0.0888	NADK	intron_variant,non_coding_transcript_variant;downstream_gene_variant;intron_variant
1	1706160	meningitisencephalitis	0.0352	-0.707	0.555	NADK	intron_variant,non_coding_transcript_variant;downstream_gene_variant;intron_variant
1	1706160	neurologicaldeficit	0.0352	-0.764	0.329	NADK	intron_variant,non_coding_transcript_variant;downstream_gene_variant;intron_variant
1	1706160	sez_freq	0.0352	34.9	1.07e-06	NADK	intron_variant,non_coding_transcript_variant;downstream_gene_variant;intron_variant
1	1706160	seztime	0.0352	37	0.728	NADK	intron_variant,non_coding_transcript_variant;downstream_gene_variant;intron_variant
1	1706160	total_sez_all_types	0.0352	1250	1.83e-06	NADK	intron_variant,non_coding_transcript_variant;downstream_gene_variant;intron_variant
1	1745726	drug_response	0.0114	1.44	0.485	GNB1	intron_variant,non_coding_transcript_variant;intron_variant
1	1745726	headInjury	0.0114	-6.08	0.771	GNB1	intron_variant,non_coding_transcript_variant;intron_variant
1	1745726	learningdisability	0.0114	-1.45	0.84	GNB1	intron_variant,non_coding_transcript_variant;intron_variant
1	1745726	meningitisencephalitis	0.0114	-4	0.787	GNB1	intron_variant,non_coding_transcript_variant;intron_variant
1	1745726	neurologicaldeficit	0.0114	-1.9	0.78	GNB1	intron_variant,non_coding_transcript_variant;intron_variant
1	1745726	sez_freq	0.0114	784	2.82e-195	GNB1	intron_variant,non_coding_transcript_variant;intron_variant
1	1745726	seztime	0.0114	-95	0.857	GNB1	intron_variant,non_coding_transcript_variant;intron_variant
1	1745726	total_sez_all_types	0.0114	27700	2.89e-168	GNB1	intron_variant,non_coding_transcript_variant;intron_variant
1	1748734	drug_response	0.000939	13.9	0.188	GNB1	intron_variant,non_coding_transcript_variant;intron_variant
1	1748734	headInjury	0.000939	-10.9	0.894	GNB1	intron_variant,non_coding_transcript_variant;intron_variant
1	1748734	learningdisability	0.000939	-11.4	0.775	GNB1	intron_variant,non_coding_transcript_variant;intron_variant
1	1748734	meningitisencephalitis	0.000939	-12	0.813	GNB1	intron_variant,non_coding_transcript_variant;intron_variant
1	1748734	neurologicaldeficit	0.000939	-11.8	0.727	GNB1	intron_variant,non_coding_transcript_variant;intron_variant
1	1748734	sez_freq	0.000939	843	5.15e-229	GNB1	intron_variant,non_coding_transcript_variant;intron_variant
1	1748734	seztime	0.000939	-335	0.543	GNB1	intron_variant,non_coding_transcript_variant;intron_variant
1	1748734	total_sez_all_types	0.000939	30000	6.05e-198	GNB1	intron_variant,non_coding_transcript_variant;intron_variant
1	1781220	drug_response	0.00167	4.82	0.205	GNB1	intron_variant,non_coding_transcript_variant;intron_variant
1	1781220	headInjury	0.00167	-2.58	0.909	GNB1	intron_variant,non_coding_transcript_variant;intron_variant
1	1781220	learningdisability	0.00167	-3.95	0.786	GNB1	intron_variant,non_coding_transcript_variant;intron_variant
1	1781220	meningitisencephalitis	0.00167	-4.56	0.818	GNB1	intron_variant,non_coding_transcript_variant;intron_variant
1	1781220	neurologicaldeficit	0.00167	-4.66	0.735	GNB1	intron_variant,non_coding_transcript_variant;intron_variant
1	1781220	sez_freq	0.00167	843	4.7e-229	GNB1	intron_variant,non_coding_transcript_variant;intron_variant
1	1781220	seztime	0.00167	-329	0.55	GNB1	intron_variant,non_coding_transcript_variant;intron_variant
1	1781220	total_sez_all_types	0.00167	30000	6.92e-198	GNB1	intron_variant,non_coding_transcript_variant;intron_variant
1	1793111	drug_response	0.00117	13.9	0.188	GNB1	intron_variant,non_coding_transcript_variant;intron_variant
1	1793111	headInjury	0.00117	-10.9	0.894	GNB1	intron_variant,non_coding_transcript_variant;intron_variant
1	1793111	learningdisability	0.00117	-11.4	0.775	GNB1	intron_variant,non_coding_transcript_variant;intron_variant
1	1793111	meningitisencephalitis	0.00117	-12	0.813	GNB1	intron_variant,non_coding_transcript_variant;intron_variant
1	1793111	neurologicaldeficit	0.00117	-11.8	0.727	GNB1	intron_variant,non_coding_transcript_variant;intron_variant
1	1793111	sez_freq	0.00117	843	5.15e-229	GNB1	intron_variant,non_coding_transcript_variant;intron_variant
1	1793111	seztime	0.00117	-335	0.543	GNB1	intron_variant,non_coding_transcript_variant;intron_variant
1	1793111	total_sez_all_types	0.00117	30000	6.05e-198	GNB1	intron_variant,non_coding_transcript_variant;intron_variant
1	1801034	drug_response	0.00238	13.9	0.188	GNB1	intron_variant,non_coding_transcript_variant;intron_variant
1	1801034	headInjury	0.00238	-10.9	0.894	GNB1	intron_variant,non_coding_transcript_variant;intron_variant
1	1801034	learningdisability	0.00238	-11.4	0.775	GNB1	intron_variant,non_coding_transcript_variant;intron_variant
1	1801034	meningitisencephalitis	0.00238	-12	0.813	GNB1	intron_variant,non_coding_transcript_variant;intron_variant
1	1801034	neurologicaldeficit	0.00238	-11.8	0.727	GNB1	intron_variant,non_coding_transcript_variant;intron_variant
1	1801034	sez_freq	0.00238	843	5.15e-229	GNB1	intron_variant,non_coding_transcript_variant;intron_variant
1	1801034	seztime	0.00238	-335	0.543	GNB1	intron_variant,non_coding_transcript_variant;intron_variant
1	1801034	total_sez_all_types	0.00238	30000	6.05e-198	GNB1	intron_variant,non_coding_transcript_variant;intron_variant
1	1810090	drug_response	0.00113	4.6	0.203	GNB1	intron_variant,non_coding_transcript_variant;intron_variant
1	1810090	headInjury	0.00113	-0.355	0.976	GNB1	intron_variant,non_coding_transcript_variant;intron_variant
1	1810090	learningdisability	0.00113	-2.07	0.822	GNB1	intron_variant,non_coding_transcript_variant;intron_variant
1	1810090	meningitisencephalitis	0.00113	-2.8	0.834	GNB1	intron_variant,non_coding_transcript_variant;intron_variant
1	1810090	neurologicaldeficit	0.00113	-2.36	0.772	GNB1	intron_variant,non_coding_transcript_variant;intron_variant
1	1810090	sez_freq	0.00113	835	6.97e-224	GNB1	intron_variant,non_coding_transcript_variant;intron_variant
1	1810090	seztime	0.00113	-289	0.598	GNB1	intron_variant,non_coding_transcript_variant;intron_variant
1	1810090	total_sez_all_types	0.00113	29700	1.24e-193	GNB1	intron_variant,non_coding_transcript_variant;intron_variant
1	1844046	drug_response	0.00113	4.14	0.219	CALML6;TMEM52	upstream_gene_variant;downstream_gene_variant
1	1844046	headInjury	0.00113	-2.09	0.916	CALML6;TMEM52	upstream_gene_variant;downstream_gene_variant
1	1844046	learningdisability	0.00113	-3.48	0.791	CALML6;TMEM52	upstream_gene_variant;downstream_gene_variant
1	1844046	meningitisencephalitis	0.00113	-3.97	0.822	CALML6;TMEM52	upstream_gene_variant;downstream_gene_variant
1	1844046	neurologicaldeficit	0.00113	-3.39	0.748	CALML6;TMEM52	upstream_gene_variant;downstream_gene_variant
1	1844046	sez_freq	0.00113	843	5.34e-229	CALML6;TMEM52	upstream_gene_variant;downstream_gene_variant
1	1844046	seztime	0.00113	-321	0.56	CALML6;TMEM52	upstream_gene_variant;downstream_gene_variant
1	1844046	total_sez_all_types	0.00113	30000	8.2e-198	CALML6;TMEM52	upstream_gene_variant;downstream_gene_variant
1	1873625	headInjury	0.00665	-0.712	0.805	C1orf222	downstream_gene_variant;intron_variant
1	1873625	learningdisability	0.00665	1.22	0.608	C1orf222	downstream_gene_variant;intron_variant
1	1873625	meningitisencephalitis	0.00665	-3.82	0.0393	C1orf222	downstream_gene_variant;intron_variant
1	1873625	neurologicaldeficit	0.00665	0.676	0.772	C1orf222	downstream_gene_variant;intron_variant
1	1873625	sez_freq	0.00665	176	2.35e-27	C1orf222	downstream_gene_variant;intron_variant
1	1873625	seztime	0.00665	-238	0.338	C1orf222	downstream_gene_variant;intron_variant
1	1873625	total_sez_all_types	0.00665	6220	1.54e-25	C1orf222	downstream_gene_variant;intron_variant
1	1874581	drug_response	0.00576	-0.306	0.765	C1orf222	downstream_gene_variant;intron_variant
1	1874581	headInjury	0.00576	-1.5	0.558	C1orf222	downstream_gene_variant;intron_variant
1	1874581	learningdisability	0.00576	1.05	0.693	C1orf222	downstream_gene_variant;intron_variant
1	1874581	meningitisencephalitis	0.00576	-0.297	0.923	C1orf222	downstream_gene_variant;intron_variant
1	1874581	neurologicaldeficit	0.00576	-0.426	0.845	C1orf222	downstream_gene_variant;intron_variant
1	1874581	sez_freq	0.00576	204	1.28e-31	C1orf222	downstream_gene_variant;intron_variant
1	1874581	seztime	0.00576	107	0.692	C1orf222	downstream_gene_variant;intron_variant
1	1874581	total_sez_all_types	0.00576	7150	6.93e-29	C1orf222	downstream_gene_variant;intron_variant
1	1888193	drug_response	0.00692	0.298	0.75	C1orf222	upstream_gene_variant;downstream_gene_variant;intron_variant;non_coding_transcript_exon_variant;missense_variant
1	1888193	headInjury	0.00692	-1.1	0.691	C1orf222	upstream_gene_variant;downstream_gene_variant;intron_variant;non_coding_transcript_exon_variant;missense_variant
1	1888193	learningdisability	0.00692	1.07	0.666	C1orf222	upstream_gene_variant;downstream_gene_variant;intron_variant;non_coding_transcript_exon_variant;missense_variant
1	1888193	meningitisencephalitis	0.00692	-0.0391	0.989	C1orf222	upstream_gene_variant;downstream_gene_variant;intron_variant;non_coding_transcript_exon_variant;missense_variant
1	1888193	neurologicaldeficit	0.00692	-0.146	0.945	C1orf222	upstream_gene_variant;downstream_gene_variant;intron_variant;non_coding_transcript_exon_variant;missense_variant
1	1888193	sez_freq	0.00692	169	3.83e-26	C1orf222	upstream_gene_variant;downstream_gene_variant;intron_variant;non_coding_transcript_exon_variant;missense_variant
1	1888193	seztime	0.00692	-372	0.128	C1orf222	upstream_gene_variant;downstream_gene_variant;intron_variant;non_coding_transcript_exon_variant;missense_variant
1	1888193	total_sez_all_types	0.00692	6000	1.88e-24	C1orf222	upstream_gene_variant;downstream_gene_variant;intron_variant;non_coding_transcript_exon_variant;missense_variant
1	1892325	drug_response	0.00364	-0.892	0.618	C1orf222	intron_variant,non_coding_transcript_variant;intron_variant;upstream_gene_variant
1	1892325	headInjury	0.00364	-5.75	0.167	C1orf222	intron_variant,non_coding_transcript_variant;intron_variant;upstream_gene_variant
1	1892325	learningdisability	0.00364	0.388	0.923	C1orf222	intron_variant,non_coding_transcript_variant;intron_variant;upstream_gene_variant
1	1892325	meningitisencephalitis	0.00364	0.133	0.98	C1orf222	intron_variant,non_coding_transcript_variant;intron_variant;upstream_gene_variant
1	1892325	neurologicaldeficit	0.00364	-4.1	0.284	C1orf222	intron_variant,non_coding_transcript_variant;intron_variant;upstream_gene_variant
1	1892325	sez_freq	0.00364	568	2.31e-109	C1orf222	intron_variant,non_coding_transcript_variant;intron_variant;upstream_gene_variant
1	1892325	seztime	0.00364	24.2	0.957	C1orf222	intron_variant,non_coding_transcript_variant;intron_variant;upstream_gene_variant
1	1892325	total_sez_all_types	0.00364	20100	3.78e-99	C1orf222	intron_variant,non_coding_transcript_variant;intron_variant;upstream_gene_variant
1	1910371	drug_response	0.0588	-0.00857	0.975	C1orf222	intron_variant,non_coding_transcript_variant;downstream_gene_variant
1	1910371	headInjury	0.0588	0.729	0.42	C1orf222	intron_variant,non_coding_transcript_variant;downstream_gene_variant
1	1910371	learningdisability	0.0588	0.72	0.388	C1orf222	intron_variant,non_coding_transcript_variant;downstream_gene_variant
1	1910371	meningitisencephalitis	0.0588	-0.0925	0.929	C1orf222	intron_variant,non_coding_transcript_variant;downstream_gene_variant
1	1910371	neurologicaldeficit	0.0588	0.676	0.287	C1orf222	intron_variant,non_coding_transcript_variant;downstream_gene_variant
1	1910371	sez_freq	0.0588	17.5	0.000244	C1orf222	intron_variant,non_coding_transcript_variant;downstream_gene_variant
1	1910371	seztime	0.0588	-4.24	0.952	C1orf222	intron_variant,non_coding_transcript_variant;downstream_gene_variant
1	1910371	total_sez_all_types	0.0588	578	0.000939	C1orf222	intron_variant,non_coding_transcript_variant;downstream_gene_variant
1	1910606	drug_response	0.0614	0.0914	0.734	C1orf222	intron_variant,non_coding_transcript_variant;downstream_gene_variant
1	1910606	headInjury	0.0614	0.646	0.458	C1orf222	intron_variant,non_coding_transcript_variant;downstream_gene_variant
1	1910606	learningdisability	0.0614	1.01	0.235	C1orf222	intron_variant,non_coding_transcript_variant;downstream_gene_variant
1	1910606	meningitisencephalitis	0.0614	-0.155	0.877	C1orf222	intron_variant,non_coding_transcript_variant;downstream_gene_variant
1	1910606	neurologicaldeficit	0.0614	0.656	0.295	C1orf222	intron_variant,non_coding_transcript_variant;downstream_gene_variant
1	1910606	sez_freq	0.0614	15.8	0.00077	C1orf222	intron_variant,non_coding_transcript_variant;downstream_gene_variant
1	1910606	seztime	0.0614	-14	0.84	C1orf222	intron_variant,non_coding_transcript_variant;downstream_gene_variant
1	1910606	total_sez_all_types	0.0614	536	0.00182	C1orf222	intron_variant,non_coding_transcript_variant;downstream_gene_variant
1	1910941	drug_response	0.0553	-0.00335	0.99	C1orf222	intron_variant,non_coding_transcript_variant;downstream_gene_variant
1	1910941	headInjury	0.0553	0.714	0.435	C1orf222	intron_variant,non_coding_transcript_variant;downstream_gene_variant
1	1910941	learningdisability	0.0553	0.696	0.407	C1orf222	intron_variant,non_coding_transcript_variant;downstream_gene_variant
1	1910941	meningitisencephalitis	0.0553	-0.137	0.895	C1orf222	intron_variant,non_coding_transcript_variant;downstream_gene_variant
1	1910941	neurologicaldeficit	0.0553	0.671	0.299	C1orf222	intron_variant,non_coding_transcript_variant;downstream_gene_variant
1	1910941	sez_freq	0.0553	18.2	0.000184	C1orf222	intron_variant,non_coding_transcript_variant;downstream_gene_variant
1	1910941	seztime	0.0553	-3.13	0.965	C1orf222	intron_variant,non_coding_transcript_variant;downstream_gene_variant
1	1910941	total_sez_all_types	0.0553	600	0.00077	C1orf222	intron_variant,non_coding_transcript_variant;downstream_gene_variant
1	1911217	drug_response	0.0607	0.0538	0.841	C1orf222	intron_variant,non_coding_transcript_variant;downstream_gene_variant
1	1911217	headInjury	0.0607	0.672	0.446	C1orf222	intron_variant,non_coding_transcript_variant;downstream_gene_variant
1	1911217	learningdisability	0.0607	0.709	0.376	C1orf222	intron_variant,non_coding_transcript_variant;downstream_gene_variant
1	1911217	meningitisencephalitis	0.0607	-0.147	0.883	C1orf222	intron_variant,non_coding_transcript_variant;downstream_gene_variant
1	1911217	neurologicaldeficit	0.0607	0.875	0.18	C1orf222	intron_variant,non_coding_transcript_variant;downstream_gene_variant
1	1911217	sez_freq	0.0607	16.1	0.000556	C1orf222	intron_variant,non_coding_transcript_variant;downstream_gene_variant
1	1911217	seztime	0.0607	-11.2	0.871	C1orf222	intron_variant,non_coding_transcript_variant;downstream_gene_variant
1	1911217	total_sez_all_types	0.0607	552	0.00128	C1orf222	intron_variant,non_coding_transcript_variant;downstream_gene_variant
1	1911319	drug_response	0.0583	0.0166	0.951	C1orf222	intron_variant,non_coding_transcript_variant;downstream_gene_variant
1	1911319	headInjury	0.0583	0.705	0.433	C1orf222	intron_variant,non_coding_transcript_variant;downstream_gene_variant
1	1911319	learningdisability	0.0583	0.628	0.442	C1orf222	intron_variant,non_coding_transcript_variant;downstream_gene_variant
1	1911319	meningitisencephalitis	0.0583	-0.148	0.885	C1orf222	intron_variant,non_coding_transcript_variant;downstream_gene_variant
1	1911319	neurologicaldeficit	0.0583	0.659	0.298	C1orf222	intron_variant,non_coding_transcript_variant;downstream_gene_variant
1	1911319	sez_freq	0.0583	15.8	0.000878	C1orf222	intron_variant,non_coding_transcript_variant;downstream_gene_variant
1	1911319	seztime	0.0583	-4.6	0.948	C1orf222	intron_variant,non_coding_transcript_variant;downstream_gene_variant
1	1911319	total_sez_all_types	0.0583	531	0.00232	C1orf222	intron_variant,non_coding_transcript_variant;downstream_gene_variant
1	1911378	drug_response	0.0188	1.45	0.0287	C1orf222	intron_variant,non_coding_transcript_variant;downstream_gene_variant
1	1911378	headInjury	0.0188	0.24	0.908	C1orf222	intron_variant,non_coding_transcript_variant;downstream_gene_variant
1	1911378	learningdisability	0.0188	1.66	0.232	C1orf222	intron_variant,non_coding_transcript_variant;downstream_gene_variant
1	1911378	meningitisencephalitis	0.0188	-2.7	0.0428	C1orf222	intron_variant,non_coding_transcript_variant;downstream_gene_variant
1	1911378	neurologicaldeficit	0.0188	0.733	0.636	C1orf222	intron_variant,non_coding_transcript_variant;downstream_gene_variant
1	1911378	sez_freq	0.0188	66.5	7.69e-11	C1orf222	intron_variant,non_coding_transcript_variant;downstream_gene_variant
1	1911378	seztime	0.0188	-71.8	0.638	C1orf222	intron_variant,non_coding_transcript_variant;downstream_gene_variant
1	1911378	total_sez_all_types	0.0188	2440	7.4e-11	C1orf222	intron_variant,non_coding_transcript_variant;downstream_gene_variant
1	2024064	drug_response	0.00823	0.884	0.242	PRKCZ	intron_variant,non_coding_transcript_variant;intron_variant;intron_variant,NMD_transcript_variant
1	2024064	headInjury	0.00823	-0.856	0.765	PRKCZ	intron_variant,non_coding_transcript_variant;intron_variant;intron_variant,NMD_transcript_variant
1	2024064	learningdisability	0.00823	0.932	0.473	PRKCZ	intron_variant,non_coding_transcript_variant;intron_variant;intron_variant,NMD_transcript_variant
1	2024064	meningitisencephalitis	0.00823	-1	0.729	PRKCZ	intron_variant,non_coding_transcript_variant;intron_variant;intron_variant,NMD_transcript_variant
1	2024064	neurologicaldeficit	0.00823	-0.252	0.903	PRKCZ	intron_variant,non_coding_transcript_variant;intron_variant;intron_variant,NMD_transcript_variant
1	2024064	sez_freq	0.00823	124	1.47e-21	PRKCZ	intron_variant,non_coding_transcript_variant;intron_variant;intron_variant,NMD_transcript_variant
1	2024064	seztime	0.00823	69	0.726	PRKCZ	intron_variant,non_coding_transcript_variant;intron_variant;intron_variant,NMD_transcript_variant
1	2024064	total_sez_all_types	0.00823	4030	4.16e-17	PRKCZ	intron_variant,non_coding_transcript_variant;intron_variant;intron_variant,NMD_transcript_variant
1	2026361	drug_response	0.0047	0.991	0.345	PRKCZ	intron_variant,non_coding_transcript_variant;intron_variant;intron_variant,NMD_transcript_variant
1	2026361	drug_response	0.00581	0.758	0.386	PRKCZ	intron_variant,non_coding_transcript_variant;intron_variant;intron_variant,NMD_transcript_variant
1	2026361	headInjury	0.0047	-0.251	0.953	PRKCZ	intron_variant,non_coding_transcript_variant;intron_variant;intron_variant,NMD_transcript_variant
1	2026361	headInjury	0.00581	0.261	0.936	PRKCZ	intron_variant,non_coding_transcript_variant;intron_variant;intron_variant,NMD_transcript_variant
1	2026361	learningdisability	0.0047	1.97	0.205	PRKCZ	intron_variant,non_coding_transcript_variant;intron_variant;intron_variant,NMD_transcript_variant
1	2026361	learningdisability	0.00581	1.74	0.227	PRKCZ	intron_variant,non_coding_transcript_variant;intron_variant;intron_variant,NMD_transcript_variant
1	2026361	meningitisencephalitis	0.0047	-1.1	0.775	PRKCZ	intron_variant,non_coding_transcript_variant;intron_variant;intron_variant,NMD_transcript_variant
1	2026361	meningitisencephalitis	0.00581	-0.63	0.834	PRKCZ	intron_variant,non_coding_transcript_variant;intron_variant;intron_variant,NMD_transcript_variant
1	2026361	neurologicaldeficit	0.0047	-0.0917	0.973	PRKCZ	intron_variant,non_coding_transcript_variant;intron_variant;intron_variant,NMD_transcript_variant
1	2026361	neurologicaldeficit	0.00581	0.454	0.83	PRKCZ	intron_variant,non_coding_transcript_variant;intron_variant;intron_variant,NMD_transcript_variant
1	2026361	sez_freq	0.0047	229	8.06e-39	PRKCZ	intron_variant,non_coding_transcript_variant;intron_variant;intron_variant,NMD_transcript_variant
1	2026361	sez_freq	0.00581	156	5.46e-26	PRKCZ	intron_variant,non_coding_transcript_variant;intron_variant;intron_variant,NMD_transcript_variant
1	2026361	seztime	0.0047	229	0.405	PRKCZ	intron_variant,non_coding_transcript_variant;intron_variant;intron_variant,NMD_transcript_variant
1	2026361	seztime	0.00581	292	0.197	PRKCZ	intron_variant,non_coding_transcript_variant;intron_variant;intron_variant,NMD_transcript_variant
1	2026361	total_sez_all_types	0.0047	7710	2e-32	PRKCZ	intron_variant,non_coding_transcript_variant;intron_variant;intron_variant,NMD_transcript_variant
1	2026361	total_sez_all_types	0.00581	5240	8.69e-22	PRKCZ	intron_variant,non_coding_transcript_variant;intron_variant;intron_variant,NMD_transcript_variant
1	2026749	drug_response	0.00598	1.37	0.175	PRKCZ	intron_variant,non_coding_transcript_variant;intron_variant;intron_variant,NMD_transcript_variant
1	2026749	drug_response	0.00751	0.974	0.247	PRKCZ	intron_variant,non_coding_transcript_variant;intron_variant;intron_variant,NMD_transcript_variant
1	2026749	headInjury	0.00598	0.0565	0.988	PRKCZ	intron_variant,non_coding_transcript_variant;intron_variant;intron_variant,NMD_transcript_variant
1	2026749	headInjury	0.00751	0.239	0.938	PRKCZ	intron_variant,non_coding_transcript_variant;intron_variant;intron_variant,NMD_transcript_variant
1	2026749	learningdisability	0.00598	1.96	0.201	PRKCZ	intron_variant,non_coding_transcript_variant;intron_variant;intron_variant,NMD_transcript_variant
1	2026749	learningdisability	0.00751	1.74	0.223	PRKCZ	intron_variant,non_coding_transcript_variant;intron_variant;intron_variant,NMD_transcript_variant
1	2026749	meningitisencephalitis	0.00598	-0.748	0.823	PRKCZ	intron_variant,non_coding_transcript_variant;intron_variant;intron_variant,NMD_transcript_variant
1	2026749	meningitisencephalitis	0.00751	-0.487	0.86	PRKCZ	intron_variant,non_coding_transcript_variant;intron_variant;intron_variant,NMD_transcript_variant
1	2026749	neurologicaldeficit	0.00598	0.249	0.918	PRKCZ	intron_variant,non_coding_transcript_variant;intron_variant;intron_variant,NMD_transcript_variant
1	2026749	neurologicaldeficit	0.00751	0.77	0.681	PRKCZ	intron_variant,non_coding_transcript_variant;intron_variant;intron_variant,NMD_transcript_variant
1	2026749	sez_freq	0.00598	192	2.81e-32	PRKCZ	intron_variant,non_coding_transcript_variant;intron_variant;intron_variant,NMD_transcript_variant
1	2026749	sez_freq	0.00751	135	3.23e-22	PRKCZ	intron_variant,non_coding_transcript_variant;intron_variant;intron_variant,NMD_transcript_variant
1	2026749	seztime	0.00598	144	0.568	PRKCZ	intron_variant,non_coding_transcript_variant;intron_variant;intron_variant,NMD_transcript_variant
1	2026749	seztime	0.00751	26	0.902	PRKCZ	intron_variant,non_coding_transcript_variant;intron_variant;intron_variant,NMD_transcript_variant
1	2026749	total_sez_all_types	0.00598	6460	7.03e-27	PRKCZ	intron_variant,non_coding_transcript_variant;intron_variant;intron_variant,NMD_transcript_variant
1	2026749	total_sez_all_types	0.00751	4570	4.78e-19	PRKCZ	intron_variant,non_coding_transcript_variant;intron_variant;intron_variant,NMD_transcript_variant
1	2033256	drug_response	0.00381	2.07	0.0791	PRKCZ	upstream_gene_variant;intron_variant,non_coding_transcript_variant;intron_variant;intron_variant,NMD_transcript_variant
1	2033256	drug_response	0.00436	1.26	0.195	PRKCZ	upstream_gene_variant;intron_variant,non_coding_transcript_variant;intron_variant;intron_variant,NMD_transcript_variant
1	2033256	headInjury	0.00381	-0.586	0.909	PRKCZ	upstream_gene_variant;intron_variant,non_coding_transcript_variant;intron_variant;intron_variant,NMD_transcript_variant
1	2033256	headInjury	0.00436	0.0621	0.987	PRKCZ	upstream_gene_variant;intron_variant,non_coding_transcript_variant;intron_variant;intron_variant,NMD_transcript_variant
1	2033256	learningdisability	0.00381	1.94	0.238	PRKCZ	upstream_gene_variant;intron_variant,non_coding_transcript_variant;intron_variant;intron_variant,NMD_transcript_variant
1	2033256	learningdisability	0.00436	1.7	0.266	PRKCZ	upstream_gene_variant;intron_variant,non_coding_transcript_variant;intron_variant;intron_variant,NMD_transcript_variant
1	2033256	meningitisencephalitis	0.00381	-0.916	0.817	PRKCZ	upstream_gene_variant;intron_variant,non_coding_transcript_variant;intron_variant;intron_variant,NMD_transcript_variant
1	2033256	meningitisencephalitis	0.00436	-0.682	0.836	PRKCZ	upstream_gene_variant;intron_variant,non_coding_transcript_variant;intron_variant;intron_variant,NMD_transcript_variant
1	2033256	neurologicaldeficit	0.00381	-0.167	0.956	PRKCZ	upstream_gene_variant;intron_variant,non_coding_transcript_variant;intron_variant;intron_variant,NMD_transcript_variant
1	2033256	neurologicaldeficit	0.00436	0.0911	0.97	PRKCZ	upstream_gene_variant;intron_variant,non_coding_transcript_variant;intron_variant;intron_variant,NMD_transcript_variant
1	2033256	sez_freq	0.00381	253	2.53e-43	PRKCZ	upstream_gene_variant;intron_variant,non_coding_transcript_variant;intron_variant;intron_variant,NMD_transcript_variant
1	2033256	sez_freq	0.00436	182	3.24e-30	PRKCZ	upstream_gene_variant;intron_variant,non_coding_transcript_variant;intron_variant;intron_variant,NMD_transcript_variant
1	2033256	seztime	0.00381	183	0.527	PRKCZ	upstream_gene_variant;intron_variant,non_coding_transcript_variant;intron_variant;intron_variant,NMD_transcript_variant
1	2033256	seztime	0.00436	265	0.28	PRKCZ	upstream_gene_variant;intron_variant,non_coding_transcript_variant;intron_variant;intron_variant,NMD_transcript_variant
1	2033256	total_sez_all_types	0.00381	8540	3.89e-36	PRKCZ	upstream_gene_variant;intron_variant,non_coding_transcript_variant;intron_variant;intron_variant,NMD_transcript_variant
1	2033256	total_sez_all_types	0.00436	6120	2.13e-25	PRKCZ	upstream_gene_variant;intron_variant,non_coding_transcript_variant;intron_variant;intron_variant,NMD_transcript_variant
1	2040936	drug_response	0.0042	2.03	0.104	PRKCZ	intron_variant,non_coding_transcript_variant;intron_variant;upstream_gene_variant;intron_variant,NMD_transcript_variant
1	2040936	drug_response	0.00521	0.909	0.341	PRKCZ	intron_variant,non_coding_transcript_variant;intron_variant;upstream_gene_variant;intron_variant,NMD_transcript_variant
1	2040936	headInjury	0.0042	-0.357	0.944	PRKCZ	intron_variant,non_coding_transcript_variant;intron_variant;upstream_gene_variant;intron_variant,NMD_transcript_variant
1	2040936	headInjury	0.00521	0.0933	0.98	PRKCZ	intron_variant,non_coding_transcript_variant;intron_variant;upstream_gene_variant;intron_variant,NMD_transcript_variant
1	2040936	learningdisability	0.0042	1.91	0.255	PRKCZ	intron_variant,non_coding_transcript_variant;intron_variant;upstream_gene_variant;intron_variant,NMD_transcript_variant
1	2040936	learningdisability	0.00521	1.65	0.287	PRKCZ	intron_variant,non_coding_transcript_variant;intron_variant;upstream_gene_variant;intron_variant,NMD_transcript_variant
1	2040936	meningitisencephalitis	0.0042	-1.51	0.755	PRKCZ	intron_variant,non_coding_transcript_variant;intron_variant;upstream_gene_variant;intron_variant,NMD_transcript_variant
1	2040936	meningitisencephalitis	0.00521	-0.752	0.82	PRKCZ	intron_variant,non_coding_transcript_variant;intron_variant;upstream_gene_variant;intron_variant,NMD_transcript_variant
1	2040936	neurologicaldeficit	0.0042	-0.891	0.805	PRKCZ	intron_variant,non_coding_transcript_variant;intron_variant;upstream_gene_variant;intron_variant,NMD_transcript_variant
1	2040936	neurologicaldeficit	0.00521	-0.39	0.879	PRKCZ	intron_variant,non_coding_transcript_variant;intron_variant;upstream_gene_variant;intron_variant,NMD_transcript_variant
1	2040936	sez_freq	0.0042	285	8.89e-50	PRKCZ	intron_variant,non_coding_transcript_variant;intron_variant;upstream_gene_variant;intron_variant,NMD_transcript_variant
1	2040936	sez_freq	0.00521	183	1.48e-30	PRKCZ	intron_variant,non_coding_transcript_variant;intron_variant;upstream_gene_variant;intron_variant,NMD_transcript_variant
1	2040936	seztime	0.0042	113	0.713	PRKCZ	intron_variant,non_coding_transcript_variant;intron_variant;upstream_gene_variant;intron_variant,NMD_transcript_variant
1	2040936	seztime	0.00521	319	0.194	PRKCZ	intron_variant,non_coding_transcript_variant;intron_variant;upstream_gene_variant;intron_variant,NMD_transcript_variant
1	2040936	total_sez_all_types	0.0042	9580	6.54e-41	PRKCZ	intron_variant,non_coding_transcript_variant;intron_variant;upstream_gene_variant;intron_variant,NMD_transcript_variant
1	2040936	total_sez_all_types	0.00521	6130	1.94e-25	PRKCZ	intron_variant,non_coding_transcript_variant;intron_variant;upstream_gene_variant;intron_variant,NMD_transcript_variant
1	2043080	drug_response	0.00607	1.43	0.152	PRKCZ	intron_variant,non_coding_transcript_variant;intron_variant;upstream_gene_variant;intron_variant,NMD_transcript_variant
1	2043080	drug_response	0.0065	0.993	0.269	PRKCZ	intron_variant,non_coding_transcript_variant;intron_variant;upstream_gene_variant;intron_variant,NMD_transcript_variant
1	2043080	headInjury	0.00607	-0.242	0.957	PRKCZ	intron_variant,non_coding_transcript_variant;intron_variant;upstream_gene_variant;intron_variant,NMD_transcript_variant
1	2043080	headInjury	0.0065	-0.0596	0.987	PRKCZ	intron_variant,non_coding_transcript_variant;intron_variant;upstream_gene_variant;intron_variant,NMD_transcript_variant
1	2043080	learningdisability	0.00607	1.79	0.249	PRKCZ	intron_variant,non_coding_transcript_variant;intron_variant;upstream_gene_variant;intron_variant,NMD_transcript_variant
1	2043080	learningdisability	0.0065	1.65	0.266	PRKCZ	intron_variant,non_coding_transcript_variant;intron_variant;upstream_gene_variant;intron_variant,NMD_transcript_variant
1	2043080	meningitisencephalitis	0.00607	-1.19	0.76	PRKCZ	intron_variant,non_coding_transcript_variant;intron_variant;upstream_gene_variant;intron_variant,NMD_transcript_variant
1	2043080	meningitisencephalitis	0.0065	-0.865	0.785	PRKCZ	intron_variant,non_coding_transcript_variant;intron_variant;upstream_gene_variant;intron_variant,NMD_transcript_variant
1	2043080	neurologicaldeficit	0.00607	-0.0184	0.995	PRKCZ	intron_variant,non_coding_transcript_variant;intron_variant;upstream_gene_variant;intron_variant,NMD_transcript_variant
1	2043080	neurologicaldeficit	0.0065	0.456	0.841	PRKCZ	intron_variant,non_coding_transcript_variant;intron_variant;upstream_gene_variant;intron_variant,NMD_transcript_variant
1	2043080	sez_freq	0.00607	201	4.46e-33	PRKCZ	intron_variant,non_coding_transcript_variant;intron_variant;upstream_gene_variant;intron_variant,NMD_transcript_variant
1	2043080	sez_freq	0.0065	160	3.68e-26	PRKCZ	intron_variant,non_coding_transcript_variant;intron_variant;upstream_gene_variant;intron_variant,NMD_transcript_variant
1	2043080	seztime	0.00607	327	0.208	PRKCZ	intron_variant,non_coding_transcript_variant;intron_variant;upstream_gene_variant;intron_variant,NMD_transcript_variant
1	2043080	seztime	0.0065	373	0.108	PRKCZ	intron_variant,non_coding_transcript_variant;intron_variant;upstream_gene_variant;intron_variant,NMD_transcript_variant
1	2043080	total_sez_all_types	0.00607	6850	1.91e-28	PRKCZ	intron_variant,non_coding_transcript_variant;intron_variant;upstream_gene_variant;intron_variant,NMD_transcript_variant
1	2043080	total_sez_all_types	0.0065	5440	2.12e-22	PRKCZ	intron_variant,non_coding_transcript_variant;intron_variant;upstream_gene_variant;intron_variant,NMD_transcript_variant
1	2051513	drug_response	0.0051	1.75	0.0953	PRKCZ	intron_variant,non_coding_transcript_variant;intron_variant;intron_variant,NMD_transcript_variant
1	2051513	drug_response	0.00512	1.28	0.175	PRKCZ	intron_variant,non_coding_transcript_variant;intron_variant;intron_variant,NMD_transcript_variant
1	2051513	headInjury	0.0051	-0.212	0.957	PRKCZ	intron_variant,non_coding_transcript_variant;intron_variant;intron_variant,NMD_transcript_variant
1	2051513	headInjury	0.00512	0.159	0.964	PRKCZ	intron_variant,non_coding_transcript_variant;intron_variant;intron_variant,NMD_transcript_variant
1	2051513	learningdisability	0.0051	1.97	0.219	PRKCZ	intron_variant,non_coding_transcript_variant;intron_variant;intron_variant,NMD_transcript_variant
1	2051513	learningdisability	0.00512	1.72	0.259	PRKCZ	intron_variant,non_coding_transcript_variant;intron_variant;intron_variant,NMD_transcript_variant
1	2051513	meningitisencephalitis	0.0051	-0.477	0.885	PRKCZ	intron_variant,non_coding_transcript_variant;intron_variant;intron_variant,NMD_transcript_variant
1	2051513	meningitisencephalitis	0.00512	-0.458	0.88	PRKCZ	intron_variant,non_coding_transcript_variant;intron_variant;intron_variant,NMD_transcript_variant
1	2051513	neurologicaldeficit	0.0051	0.0279	0.991	PRKCZ	intron_variant,non_coding_transcript_variant;intron_variant;intron_variant,NMD_transcript_variant
1	2051513	neurologicaldeficit	0.00512	0.146	0.951	PRKCZ	intron_variant,non_coding_transcript_variant;intron_variant;intron_variant,NMD_transcript_variant
1	2051513	sez_freq	0.0051	207	2.17e-35	PRKCZ	intron_variant,non_coding_transcript_variant;intron_variant;intron_variant,NMD_transcript_variant
1	2051513	sez_freq	0.00512	170	1.9e-28	PRKCZ	intron_variant,non_coding_transcript_variant;intron_variant;intron_variant,NMD_transcript_variant
1	2051513	seztime	0.0051	22.7	0.931	PRKCZ	intron_variant,non_coding_transcript_variant;intron_variant;intron_variant,NMD_transcript_variant
1	2051513	seztime	0.00512	323	0.173	PRKCZ	intron_variant,non_coding_transcript_variant;intron_variant;intron_variant,NMD_transcript_variant
1	2051513	total_sez_all_types	0.0051	6930	4.43e-29	PRKCZ	intron_variant,non_coding_transcript_variant;intron_variant;intron_variant,NMD_transcript_variant
1	2051513	total_sez_all_types	0.00512	5710	1.06e-23	PRKCZ	intron_variant,non_coding_transcript_variant;intron_variant;intron_variant,NMD_transcript_variant
1	2053205	drug_response	0.00366	2.51	0.087	PRKCZ	intron_variant,non_coding_transcript_variant;intron_variant;intron_variant,NMD_transcript_variant
1	2053205	drug_response	0.00426	1.02	0.323	PRKCZ	intron_variant,non_coding_transcript_variant;intron_variant;intron_variant,NMD_transcript_variant
1	2053205	headInjury	0.00366	-0.712	0.907	PRKCZ	intron_variant,non_coding_transcript_variant;intron_variant;intron_variant,NMD_transcript_variant
1	2053205	headInjury	0.00426	-0.0544	0.99	PRKCZ	intron_variant,non_coding_transcript_variant;intron_variant;intron_variant,NMD_transcript_variant
1	2053205	learningdisability	0.00366	1.83	0.307	PRKCZ	intron_variant,non_coding_transcript_variant;intron_variant;intron_variant,NMD_transcript_variant
1	2053205	learningdisability	0.00426	1.5	0.363	PRKCZ	intron_variant,non_coding_transcript_variant;intron_variant;intron_variant,NMD_transcript_variant
1	2053205	meningitisencephalitis	0.00366	-1.64	0.768	PRKCZ	intron_variant,non_coding_transcript_variant;intron_variant;intron_variant,NMD_transcript_variant
1	2053205	meningitisencephalitis	0.00426	-0.914	0.808	PRKCZ	intron_variant,non_coding_transcript_variant;intron_variant;intron_variant,NMD_transcript_variant
1	2053205	neurologicaldeficit	0.00366	-0.555	0.881	PRKCZ	intron_variant,non_coding_transcript_variant;intron_variant;intron_variant,NMD_transcript_variant
1	2053205	neurologicaldeficit	0.00426	-0.194	0.944	PRKCZ	intron_variant,non_coding_transcript_variant;intron_variant;intron_variant,NMD_transcript_variant
1	2053205	sez_freq	0.00366	351	3.54e-64	PRKCZ	intron_variant,non_coding_transcript_variant;intron_variant;intron_variant,NMD_transcript_variant
1	2053205	sez_freq	0.00426	219	2.98e-37	PRKCZ	intron_variant,non_coding_transcript_variant;intron_variant;intron_variant,NMD_transcript_variant
1	2053205	seztime	0.00366	-166	0.625	PRKCZ	intron_variant,non_coding_transcript_variant;intron_variant;intron_variant,NMD_transcript_variant
1	2053205	seztime	0.00426	304	0.258	PRKCZ	intron_variant,non_coding_transcript_variant;intron_variant;intron_variant,NMD_transcript_variant
1	2053205	total_sez_all_types	0.00366	11700	1.24e-51	PRKCZ	intron_variant,non_coding_transcript_variant;intron_variant;intron_variant,NMD_transcript_variant
1	2053205	total_sez_all_types	0.00426	7330	1.25e-30	PRKCZ	intron_variant,non_coding_transcript_variant;intron_variant;intron_variant,NMD_transcript_variant
1	2058023	drug_response	0.00669	0.554	0.489	PRKCZ	intron_variant,non_coding_transcript_variant;intron_variant;intron_variant,NMD_transcript_variant
1	2058023	drug_response	0.00671	0.884	0.308	PRKCZ	intron_variant,non_coding_transcript_variant;intron_variant;intron_variant,NMD_transcript_variant
1	2058023	headInjury	0.00669	0.353	0.901	PRKCZ	intron_variant,non_coding_transcript_variant;intron_variant;intron_variant,NMD_transcript_variant
1	2058023	headInjury	0.00671	0.311	0.914	PRKCZ	intron_variant,non_coding_transcript_variant;intron_variant;intron_variant,NMD_transcript_variant
1	2058023	learningdisability	0.00669	1.74	0.222	PRKCZ	intron_variant,non_coding_transcript_variant;intron_variant;intron_variant,NMD_transcript_variant
1	2058023	learningdisability	0.00671	1.91	0.202	PRKCZ	intron_variant,non_coding_transcript_variant;intron_variant;intron_variant,NMD_transcript_variant
1	2058023	meningitisencephalitis	0.00669	-3.9	0.0253	PRKCZ	intron_variant,non_coding_transcript_variant;intron_variant;intron_variant,NMD_transcript_variant
1	2058023	meningitisencephalitis	0.00671	-3.97	0.0218	PRKCZ	intron_variant,non_coding_transcript_variant;intron_variant;intron_variant,NMD_transcript_variant
1	2058023	neurologicaldeficit	0.00669	0.571	0.776	PRKCZ	intron_variant,non_coding_transcript_variant;intron_variant;intron_variant,NMD_transcript_variant
1	2058023	neurologicaldeficit	0.00671	0.229	0.915	PRKCZ	intron_variant,non_coding_transcript_variant;intron_variant;intron_variant,NMD_transcript_variant
1	2058023	sez_freq	0.00669	129	1.34e-21	PRKCZ	intron_variant,non_coding_transcript_variant;intron_variant;intron_variant,NMD_transcript_variant
1	2058023	sez_freq	0.00671	142	6.91e-24	PRKCZ	intron_variant,non_coding_transcript_variant;intron_variant;intron_variant,NMD_transcript_variant
1	2058023	seztime	0.00669	347	0.0904	PRKCZ	intron_variant,non_coding_transcript_variant;intron_variant;intron_variant,NMD_transcript_variant
1	2058023	seztime	0.00671	272	0.207	PRKCZ	intron_variant,non_coding_transcript_variant;intron_variant;intron_variant,NMD_transcript_variant
1	2058023	total_sez_all_types	0.00669	4310	5.51e-18	PRKCZ	intron_variant,non_coding_transcript_variant;intron_variant;intron_variant,NMD_transcript_variant
1	2058023	total_sez_all_types	0.00671	4740	8.76e-20	PRKCZ	intron_variant,non_coding_transcript_variant;intron_variant;intron_variant,NMD_transcript_variant
1	2068906	drug_response	0.00499	2.36	0.0529	RP5-892K4.1;PRKCZ	intron_variant,non_coding_transcript_variant;downstream_gene_variant;intron_variant;intron_variant,NMD_transcript_variant
1	2068906	drug_response	0.00519	1.31	0.192	RP5-892K4.1;PRKCZ	intron_variant,non_coding_transcript_variant;downstream_gene_variant;intron_variant;intron_variant,NMD_transcript_variant
1	2068906	headInjury	0.00499	-0.0576	0.988	RP5-892K4.1;PRKCZ	intron_variant,non_coding_transcript_variant;downstream_gene_variant;intron_variant;intron_variant,NMD_transcript_variant
1	2068906	headInjury	0.00519	-0.0733	0.985	RP5-892K4.1;PRKCZ	intron_variant,non_coding_transcript_variant;downstream_gene_variant;intron_variant;intron_variant,NMD_transcript_variant
1	2068906	learningdisability	0.00499	1.88	0.254	RP5-892K4.1;PRKCZ	intron_variant,non_coding_transcript_variant;downstream_gene_variant;intron_variant;intron_variant,NMD_transcript_variant
1	2068906	learningdisability	0.00519	1.65	0.292	RP5-892K4.1;PRKCZ	intron_variant,non_coding_transcript_variant;downstream_gene_variant;intron_variant;intron_variant,NMD_transcript_variant
1	2068906	meningitisencephalitis	0.00499	-8.78	0.00239	RP5-892K4.1;PRKCZ	intron_variant,non_coding_transcript_variant;downstream_gene_variant;intron_variant;intron_variant,NMD_transcript_variant
1	2068906	meningitisencephalitis	0.00519	-3.36	0.281	RP5-892K4.1;PRKCZ	intron_variant,non_coding_transcript_variant;downstream_gene_variant;intron_variant;intron_variant,NMD_transcript_variant
1	2068906	neurologicaldeficit	0.00499	-0.567	0.859	RP5-892K4.1;PRKCZ	intron_variant,non_coding_transcript_variant;downstream_gene_variant;intron_variant;intron_variant,NMD_transcript_variant
1	2068906	neurologicaldeficit	0.00519	-0.281	0.919	RP5-892K4.1;PRKCZ	intron_variant,non_coding_transcript_variant;downstream_gene_variant;intron_variant;intron_variant,NMD_transcript_variant
1	2068906	sez_freq	0.00499	228	9.31e-39	RP5-892K4.1;PRKCZ	intron_variant,non_coding_transcript_variant;downstream_gene_variant;intron_variant;intron_variant,NMD_transcript_variant
1	2068906	sez_freq	0.00519	193	3.48e-32	RP5-892K4.1;PRKCZ	intron_variant,non_coding_transcript_variant;downstream_gene_variant;intron_variant;intron_variant,NMD_transcript_variant
1	2068906	seztime	0.00499	117	0.67	RP5-892K4.1;PRKCZ	intron_variant,non_coding_transcript_variant;downstream_gene_variant;intron_variant;intron_variant,NMD_transcript_variant
1	2068906	seztime	0.00519	320	0.207	RP5-892K4.1;PRKCZ	intron_variant,non_coding_transcript_variant;downstream_gene_variant;intron_variant;intron_variant,NMD_transcript_variant
1	2068906	total_sez_all_types	0.00499	7650	5.38e-32	RP5-892K4.1;PRKCZ	intron_variant,non_coding_transcript_variant;downstream_gene_variant;intron_variant;intron_variant,NMD_transcript_variant
1	2068906	total_sez_all_types	0.00519	6500	6.9e-27	RP5-892K4.1;PRKCZ	intron_variant,non_coding_transcript_variant;downstream_gene_variant;intron_variant;intron_variant,NMD_transcript_variant
1	2069681	drug_response	0.00585	1.15	0.228	RP5-892K4.1;PRKCZ	intron_variant,non_coding_transcript_variant;downstream_gene_variant;intron_variant;intron_variant,NMD_transcript_variant
1	2069681	drug_response	0.00623	0.727	0.401	RP5-892K4.1;PRKCZ	intron_variant,non_coding_transcript_variant;downstream_gene_variant;intron_variant;intron_variant,NMD_transcript_variant
1	2069681	headInjury	0.00585	0.335	0.915	RP5-892K4.1;PRKCZ	intron_variant,non_coding_transcript_variant;downstream_gene_variant;intron_variant;intron_variant,NMD_transcript_variant
1	2069681	headInjury	0.00623	0.333	0.914	RP5-892K4.1;PRKCZ	intron_variant,non_coding_transcript_variant;downstream_gene_variant;intron_variant;intron_variant,NMD_transcript_variant
1	2069681	learningdisability	0.00585	1.74	0.276	RP5-892K4.1;PRKCZ	intron_variant,non_coding_transcript_variant;downstream_gene_variant;intron_variant;intron_variant,NMD_transcript_variant
1	2069681	learningdisability	0.00623	1.54	0.31	RP5-892K4.1;PRKCZ	intron_variant,non_coding_transcript_variant;downstream_gene_variant;intron_variant;intron_variant,NMD_transcript_variant
1	2069681	meningitisencephalitis	0.00585	-4.62	0.0134	RP5-892K4.1;PRKCZ	intron_variant,non_coding_transcript_variant;downstream_gene_variant;intron_variant;intron_variant,NMD_transcript_variant
1	2069681	meningitisencephalitis	0.00623	-3.91	0.0462	RP5-892K4.1;PRKCZ	intron_variant,non_coding_transcript_variant;downstream_gene_variant;intron_variant;intron_variant,NMD_transcript_variant
1	2069681	neurologicaldeficit	0.00585	0.0413	0.986	RP5-892K4.1;PRKCZ	intron_variant,non_coding_transcript_variant;downstream_gene_variant;intron_variant;intron_variant,NMD_transcript_variant
1	2069681	neurologicaldeficit	0.00623	0.221	0.919	RP5-892K4.1;PRKCZ	intron_variant,non_coding_transcript_variant;downstream_gene_variant;intron_variant;intron_variant,NMD_transcript_variant
1	2069681	sez_freq	0.00585	167	3.63e-28	RP5-892K4.1;PRKCZ	intron_variant,non_coding_transcript_variant;downstream_gene_variant;intron_variant;intron_variant,NMD_transcript_variant
1	2069681	sez_freq	0.00623	149	6.93e-25	RP5-892K4.1;PRKCZ	intron_variant,non_coding_transcript_variant;downstream_gene_variant;intron_variant;intron_variant,NMD_transcript_variant
1	2069681	seztime	0.00585	276	0.237	RP5-892K4.1;PRKCZ	intron_variant,non_coding_transcript_variant;downstream_gene_variant;intron_variant;intron_variant,NMD_transcript_variant
1	2069681	seztime	0.00623	376	0.0882	RP5-892K4.1;PRKCZ	intron_variant,non_coding_transcript_variant;downstream_gene_variant;intron_variant;intron_variant,NMD_transcript_variant
1	2069681	total_sez_all_types	0.00585	5560	3.89e-23	RP5-892K4.1;PRKCZ	intron_variant,non_coding_transcript_variant;downstream_gene_variant;intron_variant;intron_variant,NMD_transcript_variant
1	2069681	total_sez_all_types	0.00623	4960	1.26e-20	RP5-892K4.1;PRKCZ	intron_variant,non_coding_transcript_variant;downstream_gene_variant;intron_variant;intron_variant,NMD_transcript_variant
1	2071340	drug_response	0.0114	1.73	0.0814	RP5-892K4.1;PRKCZ	upstream_gene_variant;intron_variant,non_coding_transcript_variant;downstream_gene_variant;intron_variant;intron_variant,NMD_transcript_variant
1	2071340	drug_response	0.0144	1.54	0.0723	RP5-892K4.1;PRKCZ	upstream_gene_variant;intron_variant,non_coding_transcript_variant;downstream_gene_variant;intron_variant;intron_variant,NMD_transcript_variant
1	2071340	headInjury	0.0114	0.412	0.898	RP5-892K4.1;PRKCZ	upstream_gene_variant;intron_variant,non_coding_transcript_variant;downstream_gene_variant;intron_variant;intron_variant,NMD_transcript_variant
1	2071340	headInjury	0.0144	0.955	0.701	RP5-892K4.1;PRKCZ	upstream_gene_variant;intron_variant,non_coding_transcript_variant;downstream_gene_variant;intron_variant;intron_variant,NMD_transcript_variant
1	2071340	learningdisability	0.0114	2.02	0.179	RP5-892K4.1;PRKCZ	upstream_gene_variant;intron_variant,non_coding_transcript_variant;downstream_gene_variant;intron_variant;intron_variant,NMD_transcript_variant
1	2071340	learningdisability	0.0144	1.96	0.179	RP5-892K4.1;PRKCZ	upstream_gene_variant;intron_variant,non_coding_transcript_variant;downstream_gene_variant;intron_variant;intron_variant,NMD_transcript_variant
1	2071340	meningitisencephalitis	0.0114	-4.71	0.0159	RP5-892K4.1;PRKCZ	upstream_gene_variant;intron_variant,non_coding_transcript_variant;downstream_gene_variant;intron_variant;intron_variant,NMD_transcript_variant
1	2071340	meningitisencephalitis	0.0144	-0.329	0.902	RP5-892K4.1;PRKCZ	upstream_gene_variant;intron_variant,non_coding_transcript_variant;downstream_gene_variant;intron_variant;intron_variant,NMD_transcript_variant
1	2071340	neurologicaldeficit	0.0114	0.233	0.92	RP5-892K4.1;PRKCZ	upstream_gene_variant;intron_variant,non_coding_transcript_variant;downstream_gene_variant;intron_variant;intron_variant,NMD_transcript_variant
1	2071340	neurologicaldeficit	0.0144	0.69	0.715	RP5-892K4.1;PRKCZ	upstream_gene_variant;intron_variant,non_coding_transcript_variant;downstream_gene_variant;intron_variant;intron_variant,NMD_transcript_variant
1	2071340	sez_freq	0.0114	154	1.17e-23	RP5-892K4.1;PRKCZ	upstream_gene_variant;intron_variant,non_coding_transcript_variant;downstream_gene_variant;intron_variant;intron_variant,NMD_transcript_variant
1	2071340	sez_freq	0.0144	114	6.7e-18	RP5-892K4.1;PRKCZ	upstream_gene_variant;intron_variant,non_coding_transcript_variant;downstream_gene_variant;intron_variant;intron_variant,NMD_transcript_variant
1	2071340	seztime	0.0114	159	0.496	RP5-892K4.1;PRKCZ	upstream_gene_variant;intron_variant,non_coding_transcript_variant;downstream_gene_variant;intron_variant;intron_variant,NMD_transcript_variant
1	2071340	seztime	0.0144	153	0.445	RP5-892K4.1;PRKCZ	upstream_gene_variant;intron_variant,non_coding_transcript_variant;downstream_gene_variant;intron_variant;intron_variant,NMD_transcript_variant
1	2071340	total_sez_all_types	0.0114	4690	1.46e-16	RP5-892K4.1;PRKCZ	upstream_gene_variant;intron_variant,non_coding_transcript_variant;downstream_gene_variant;intron_variant;intron_variant,NMD_transcript_variant
1	2071340	total_sez_all_types	0.0144	3430	2.28e-12	RP5-892K4.1;PRKCZ	upstream_gene_variant;intron_variant,non_coding_transcript_variant;downstream_gene_variant;intron_variant;intron_variant,NMD_transcript_variant
1	2082489	drug_response	0.00912	2.17	0.0976	PRKCZ	downstream_gene_variant;intron_variant,non_coding_transcript_variant;intron_variant;intron_variant,NMD_transcript_variant
1	2082489	drug_response	0.0118	1.72	0.094	PRKCZ	downstream_gene_variant;intron_variant,non_coding_transcript_variant;intron_variant;intron_variant,NMD_transcript_variant
1	2082489	headInjury	0.00912	0.397	0.926	PRKCZ	downstream_gene_variant;intron_variant,non_coding_transcript_variant;intron_variant;intron_variant,NMD_transcript_variant
1	2082489	headInjury	0.0118	1.12	0.71	PRKCZ	downstream_gene_variant;intron_variant,non_coding_transcript_variant;intron_variant;intron_variant,NMD_transcript_variant
1	2082489	learningdisability	0.00912	0.815	0.697	PRKCZ	downstream_gene_variant;intron_variant,non_coding_transcript_variant;intron_variant;intron_variant,NMD_transcript_variant
1	2082489	learningdisability	0.0118	0.461	0.81	PRKCZ	downstream_gene_variant;intron_variant,non_coding_transcript_variant;intron_variant;intron_variant,NMD_transcript_variant
1	2082489	meningitisencephalitis	0.00912	-4.54	0.0639	PRKCZ	downstream_gene_variant;intron_variant,non_coding_transcript_variant;intron_variant;intron_variant,NMD_transcript_variant
1	2082489	meningitisencephalitis	0.0118	0.0939	0.975	PRKCZ	downstream_gene_variant;intron_variant,non_coding_transcript_variant;intron_variant;intron_variant,NMD_transcript_variant
1	2082489	neurologicaldeficit	0.00912	0.326	0.901	PRKCZ	downstream_gene_variant;intron_variant,non_coding_transcript_variant;intron_variant;intron_variant,NMD_transcript_variant
1	2082489	neurologicaldeficit	0.0118	0.0382	0.986	PRKCZ	downstream_gene_variant;intron_variant,non_coding_transcript_variant;intron_variant;intron_variant,NMD_transcript_variant
1	2082489	sez_freq	0.00912	242	8.05e-39	PRKCZ	downstream_gene_variant;intron_variant,non_coding_transcript_variant;intron_variant;intron_variant,NMD_transcript_variant
1	2082489	sez_freq	0.0118	158	2.4e-25	PRKCZ	downstream_gene_variant;intron_variant,non_coding_transcript_variant;intron_variant;intron_variant,NMD_transcript_variant
1	2082489	seztime	0.00912	36.3	0.901	PRKCZ	downstream_gene_variant;intron_variant,non_coding_transcript_variant;intron_variant;intron_variant,NMD_transcript_variant
1	2082489	seztime	0.0118	52.4	0.822	PRKCZ	downstream_gene_variant;intron_variant,non_coding_transcript_variant;intron_variant;intron_variant,NMD_transcript_variant
1	2082489	total_sez_all_types	0.00912	7500	4.07e-27	PRKCZ	downstream_gene_variant;intron_variant,non_coding_transcript_variant;intron_variant;intron_variant,NMD_transcript_variant
1	2082489	total_sez_all_types	0.0118	4820	1.31e-17	PRKCZ	downstream_gene_variant;intron_variant,non_coding_transcript_variant;intron_variant;intron_variant,NMD_transcript_variant
1	2082566	drug_response	0.0108	3.94	0.0242	PRKCZ	downstream_gene_variant;intron_variant,non_coding_transcript_variant;intron_variant;intron_variant,NMD_transcript_variant
1	2082566	drug_response	0.0123	3.46	0.0197	PRKCZ	downstream_gene_variant;intron_variant,non_coding_transcript_variant;intron_variant;intron_variant,NMD_transcript_variant
1	2082566	headInjury	0.0108	0.648	0.882	PRKCZ	downstream_gene_variant;intron_variant,non_coding_transcript_variant;intron_variant;intron_variant,NMD_transcript_variant
1	2082566	headInjury	0.0123	1.21	0.715	PRKCZ	downstream_gene_variant;intron_variant,non_coding_transcript_variant;intron_variant;intron_variant,NMD_transcript_variant
1	2082566	learningdisability	0.0108	1.38	0.512	PRKCZ	downstream_gene_variant;intron_variant,non_coding_transcript_variant;intron_variant;intron_variant,NMD_transcript_variant
1	2082566	learningdisability	0.0123	0.746	0.725	PRKCZ	downstream_gene_variant;intron_variant,non_coding_transcript_variant;intron_variant;intron_variant,NMD_transcript_variant
1	2082566	meningitisencephalitis	0.0108	-4.65	0.0224	PRKCZ	downstream_gene_variant;intron_variant,non_coding_transcript_variant;intron_variant;intron_variant,NMD_transcript_variant
1	2082566	meningitisencephalitis	0.0123	-0.0452	0.989	PRKCZ	downstream_gene_variant;intron_variant,non_coding_transcript_variant;intron_variant;intron_variant,NMD_transcript_variant
1	2082566	neurologicaldeficit	0.0108	0.269	0.922	PRKCZ	downstream_gene_variant;intron_variant,non_coding_transcript_variant;intron_variant;intron_variant,NMD_transcript_variant
1	2082566	neurologicaldeficit	0.0123	0.698	0.763	PRKCZ	downstream_gene_variant;intron_variant,non_coding_transcript_variant;intron_variant;intron_variant,NMD_transcript_variant
1	2082566	sez_freq	0.0108	249	1.8e-41	PRKCZ	downstream_gene_variant;intron_variant,non_coding_transcript_variant;intron_variant;intron_variant,NMD_transcript_variant
1	2082566	sez_freq	0.0123	187	6.05e-31	PRKCZ	downstream_gene_variant;intron_variant,non_coding_transcript_variant;intron_variant;intron_variant,NMD_transcript_variant
1	2082566	seztime	0.0108	2.44	0.993	PRKCZ	downstream_gene_variant;intron_variant,non_coding_transcript_variant;intron_variant;intron_variant,NMD_transcript_variant
1	2082566	seztime	0.0123	1.89	0.994	PRKCZ	downstream_gene_variant;intron_variant,non_coding_transcript_variant;intron_variant;intron_variant,NMD_transcript_variant
1	2082566	total_sez_all_types	0.0108	7970	7.23e-31	PRKCZ	downstream_gene_variant;intron_variant,non_coding_transcript_variant;intron_variant;intron_variant,NMD_transcript_variant
1	2082566	total_sez_all_types	0.0123	5960	3.89e-23	PRKCZ	downstream_gene_variant;intron_variant,non_coding_transcript_variant;intron_variant;intron_variant,NMD_transcript_variant
1	2089526	drug_response	0.0115	1.63	0.137	PRKCZ	intron_variant,non_coding_transcript_variant;downstream_gene_variant;intron_variant;intron_variant,NMD_transcript_variant
1	2089526	headInjury	0.0115	0.906	0.798	PRKCZ	intron_variant,non_coding_transcript_variant;downstream_gene_variant;intron_variant;intron_variant,NMD_transcript_variant
1	2089526	learningdisability	0.0115	1.79	0.349	PRKCZ	intron_variant,non_coding_transcript_variant;downstream_gene_variant;intron_variant;intron_variant,NMD_transcript_variant
1	2089526	meningitisencephalitis	0.0115	-4.1	0.0257	PRKCZ	intron_variant,non_coding_transcript_variant;downstream_gene_variant;intron_variant;intron_variant,NMD_transcript_variant
1	2089526	neurologicaldeficit	0.0115	0.619	0.788	PRKCZ	intron_variant,non_coding_transcript_variant;downstream_gene_variant;intron_variant;intron_variant,NMD_transcript_variant
1	2089526	sez_freq	0.0115	167	1.45e-24	PRKCZ	intron_variant,non_coding_transcript_variant;downstream_gene_variant;intron_variant;intron_variant,NMD_transcript_variant
1	2089526	seztime	0.0115	92.5	0.711	PRKCZ	intron_variant,non_coding_transcript_variant;downstream_gene_variant;intron_variant;intron_variant,NMD_transcript_variant
1	2089526	total_sez_all_types	0.0115	5040	9.67e-17	PRKCZ	intron_variant,non_coding_transcript_variant;downstream_gene_variant;intron_variant;intron_variant,NMD_transcript_variant
1	2096638	drug_response	0.00265	1.78	0.113	PRKCZ	upstream_gene_variant;intron_variant,non_coding_transcript_variant;intron_variant;intron_variant,NMD_transcript_variant
1	2096638	headInjury	0.00265	-0.0787	0.983	PRKCZ	upstream_gene_variant;intron_variant,non_coding_transcript_variant;intron_variant;intron_variant,NMD_transcript_variant
1	2096638	learningdisability	0.00265	1.93	0.239	PRKCZ	upstream_gene_variant;intron_variant,non_coding_transcript_variant;intron_variant;intron_variant,NMD_transcript_variant
1	2096638	meningitisencephalitis	0.00265	-9.57	0.00209	PRKCZ	upstream_gene_variant;intron_variant,non_coding_transcript_variant;intron_variant;intron_variant,NMD_transcript_variant
1	2096638	neurologicaldeficit	0.00265	-0.638	0.842	PRKCZ	upstream_gene_variant;intron_variant,non_coding_transcript_variant;intron_variant;intron_variant,NMD_transcript_variant
1	2096638	sez_freq	0.00265	218	1.27e-36	PRKCZ	upstream_gene_variant;intron_variant,non_coding_transcript_variant;intron_variant;intron_variant,NMD_transcript_variant
1	2096638	seztime	0.00265	109	0.685	PRKCZ	upstream_gene_variant;intron_variant,non_coding_transcript_variant;intron_variant;intron_variant,NMD_transcript_variant
1	2096638	total_sez_all_types	0.00265	7340	1.35e-30	PRKCZ	upstream_gene_variant;intron_variant,non_coding_transcript_variant;intron_variant;intron_variant,NMD_transcript_variant
1	2113565	drug_response	0.00347	2.03	0.0755	RP11-181G12.2;C1orf86;PRKCZ	intron_variant,non_coding_transcript_variant;downstream_gene_variant;intron_variant;non_coding_transcript_exon_variant;intron_variant,NMD_transcript_variant
1	2113565	headInjury	0.00347	-0.0245	0.995	RP11-181G12.2;C1orf86;PRKCZ	intron_variant,non_coding_transcript_variant;downstream_gene_variant;intron_variant;non_coding_transcript_exon_variant;intron_variant,NMD_transcript_variant
1	2113565	learningdisability	0.00347	1.94	0.225	RP11-181G12.2;C1orf86;PRKCZ	intron_variant,non_coding_transcript_variant;downstream_gene_variant;intron_variant;non_coding_transcript_exon_variant;intron_variant,NMD_transcript_variant
1	2113565	meningitisencephalitis	0.00347	-12.7	0.00177	RP11-181G12.2;C1orf86;PRKCZ	intron_variant,non_coding_transcript_variant;downstream_gene_variant;intron_variant;non_coding_transcript_exon_variant;intron_variant,NMD_transcript_variant
1	2113565	neurologicaldeficit	0.00347	-0.597	0.85	RP11-181G12.2;C1orf86;PRKCZ	intron_variant,non_coding_transcript_variant;downstream_gene_variant;intron_variant;non_coding_transcript_exon_variant;intron_variant,NMD_transcript_variant
1	2113565	sez_freq	0.00347	210	4.35e-35	RP11-181G12.2;C1orf86;PRKCZ	intron_variant,non_coding_transcript_variant;downstream_gene_variant;intron_variant;non_coding_transcript_exon_variant;intron_variant,NMD_transcript_variant
1	2113565	seztime	0.00347	67.6	0.799	RP11-181G12.2;C1orf86;PRKCZ	intron_variant,non_coding_transcript_variant;downstream_gene_variant;intron_variant;non_coding_transcript_exon_variant;intron_variant,NMD_transcript_variant
1	2113565	total_sez_all_types	0.00347	7100	1.68e-29	RP11-181G12.2;C1orf86;PRKCZ	intron_variant,non_coding_transcript_variant;downstream_gene_variant;intron_variant;non_coding_transcript_exon_variant;intron_variant,NMD_transcript_variant
1	2119833	drug_response	0.00377	2.32	0.0391	AL590822.2;RP11-181G12.2;C1orf86;PRKCZ	upstream_gene_variant;intron_variant,non_coding_transcript_variant;downstream_gene_variant;intron_variant;intron_variant,NMD_transcript_variant
1	2119833	headInjury	0.00377	-1	0.763	AL590822.2;RP11-181G12.2;C1orf86;PRKCZ	upstream_gene_variant;intron_variant,non_coding_transcript_variant;downstream_gene_variant;intron_variant;intron_variant,NMD_transcript_variant
1	2119833	learningdisability	0.00377	1.89	0.233	AL590822.2;RP11-181G12.2;C1orf86;PRKCZ	upstream_gene_variant;intron_variant,non_coding_transcript_variant;downstream_gene_variant;intron_variant;intron_variant,NMD_transcript_variant
1	2119833	meningitisencephalitis	0.00377	-7.39	0.00282	AL590822.2;RP11-181G12.2;C1orf86;PRKCZ	upstream_gene_variant;intron_variant,non_coding_transcript_variant;downstream_gene_variant;intron_variant;intron_variant,NMD_transcript_variant
1	2119833	neurologicaldeficit	0.00377	-0.243	0.933	AL590822.2;RP11-181G12.2;C1orf86;PRKCZ	upstream_gene_variant;intron_variant,non_coding_transcript_variant;downstream_gene_variant;intron_variant;intron_variant,NMD_transcript_variant
1	2119833	sez_freq	0.00377	191	3.37e-31	AL590822.2;RP11-181G12.2;C1orf86;PRKCZ	upstream_gene_variant;intron_variant,non_coding_transcript_variant;downstream_gene_variant;intron_variant;intron_variant,NMD_transcript_variant
1	2119833	seztime	0.00377	-11.7	0.963	AL590822.2;RP11-181G12.2;C1orf86;PRKCZ	upstream_gene_variant;intron_variant,non_coding_transcript_variant;downstream_gene_variant;intron_variant;intron_variant,NMD_transcript_variant
1	2119833	total_sez_all_types	0.00377	6510	8.49e-27	AL590822.2;RP11-181G12.2;C1orf86;PRKCZ	upstream_gene_variant;intron_variant,non_coding_transcript_variant;downstream_gene_variant;intron_variant;intron_variant,NMD_transcript_variant
1	2140261	drug_response	0.00301	3.94	0.0199	RP11-181G12.5;AL590822.1;C1orf86;RP11-181G12.4	downstream_gene_variant;intron_variant,non_coding_transcript_variant;upstream_gene_variant
1	2140261	headInjury	0.00301	-0.044	0.991	RP11-181G12.5;AL590822.1;C1orf86;RP11-181G12.4	downstream_gene_variant;intron_variant,non_coding_transcript_variant;upstream_gene_variant
1	2140261	learningdisability	0.00301	2.11	0.212	RP11-181G12.5;AL590822.1;C1orf86;RP11-181G12.4	downstream_gene_variant;intron_variant,non_coding_transcript_variant;upstream_gene_variant
1	2140261	meningitisencephalitis	0.00301	-14.7	0.00193	RP11-181G12.5;AL590822.1;C1orf86;RP11-181G12.4	downstream_gene_variant;intron_variant,non_coding_transcript_variant;upstream_gene_variant
1	2140261	neurologicaldeficit	0.00301	-0.737	0.826	RP11-181G12.5;AL590822.1;C1orf86;RP11-181G12.4	downstream_gene_variant;intron_variant,non_coding_transcript_variant;upstream_gene_variant
1	2140261	sez_freq	0.00301	255	6.56e-44	RP11-181G12.5;AL590822.1;C1orf86;RP11-181G12.4	downstream_gene_variant;intron_variant,non_coding_transcript_variant;upstream_gene_variant
1	2140261	seztime	0.00301	-84.9	0.77	RP11-181G12.5;AL590822.1;C1orf86;RP11-181G12.4	downstream_gene_variant;intron_variant,non_coding_transcript_variant;upstream_gene_variant
1	2140261	total_sez_all_types	0.00301	8570	3.78e-36	RP11-181G12.5;AL590822.1;C1orf86;RP11-181G12.4	downstream_gene_variant;intron_variant,non_coding_transcript_variant;upstream_gene_variant
1	2146966	drug_response	0.0126	0.769	0.329	RP11-181G12.5;AL590822.1;C1orf86;RP11-181G12.4	upstream_gene_variant;intron_variant,non_coding_transcript_variant
1	2146966	headInjury	0.0126	-0.605	0.84	RP11-181G12.5;AL590822.1;C1orf86;RP11-181G12.4	upstream_gene_variant;intron_variant,non_coding_transcript_variant
1	2146966	learningdisability	0.0126	0.297	0.833	RP11-181G12.5;AL590822.1;C1orf86;RP11-181G12.4	upstream_gene_variant;intron_variant,non_coding_transcript_variant
1	2146966	meningitisencephalitis	0.0126	-0.38	0.893	RP11-181G12.5;AL590822.1;C1orf86;RP11-181G12.4	upstream_gene_variant;intron_variant,non_coding_transcript_variant
1	2146966	neurologicaldeficit	0.0126	0.758	0.745	RP11-181G12.5;AL590822.1;C1orf86;RP11-181G12.4	upstream_gene_variant;intron_variant,non_coding_transcript_variant
1	2146966	sez_freq	0.0126	21.6	0.115	RP11-181G12.5;AL590822.1;C1orf86;RP11-181G12.4	upstream_gene_variant;intron_variant,non_coding_transcript_variant
1	2146966	seztime	0.0126	-270	0.18	RP11-181G12.5;AL590822.1;C1orf86;RP11-181G12.4	upstream_gene_variant;intron_variant,non_coding_transcript_variant
1	2146966	total_sez_all_types	0.0126	203	0.686	RP11-181G12.5;AL590822.1;C1orf86;RP11-181G12.4	upstream_gene_variant;intron_variant,non_coding_transcript_variant
1	2155869	drug_response	0.0141	0.892	0.207	RP11-181G12.4;SKI	upstream_gene_variant;downstream_gene_variant
1	2155869	headInjury	0.0141	-0.404	0.872	RP11-181G12.4;SKI	upstream_gene_variant;downstream_gene_variant
1	2155869	learningdisability	0.0141	0.848	0.496	RP11-181G12.4;SKI	upstream_gene_variant;downstream_gene_variant
1	2155869	meningitisencephalitis	0.0141	-0.301	0.903	RP11-181G12.4;SKI	upstream_gene_variant;downstream_gene_variant
1	2155869	neurologicaldeficit	0.0141	0.903	0.642	RP11-181G12.4;SKI	upstream_gene_variant;downstream_gene_variant
1	2155869	sez_freq	0.0141	16	0.185	RP11-181G12.4;SKI	upstream_gene_variant;downstream_gene_variant
1	2155869	seztime	0.0141	-276	0.118	RP11-181G12.4;SKI	upstream_gene_variant;downstream_gene_variant
1	2155869	total_sez_all_types	0.0141	181	0.683	RP11-181G12.4;SKI	upstream_gene_variant;downstream_gene_variant
1	2156362	drug_response	0.0132	1.04	0.139	RP11-181G12.4;SKI	upstream_gene_variant;downstream_gene_variant
1	2156362	headInjury	0.0132	-1.34	0.662	RP11-181G12.4;SKI	upstream_gene_variant;downstream_gene_variant
1	2156362	learningdisability	0.0132	0.715	0.537	RP11-181G12.4;SKI	upstream_gene_variant;downstream_gene_variant
1	2156362	meningitisencephalitis	0.0132	-0.47	0.852	RP11-181G12.4;SKI	upstream_gene_variant;downstream_gene_variant
1	2156362	neurologicaldeficit	0.0132	0.569	0.784	RP11-181G12.4;SKI	upstream_gene_variant;downstream_gene_variant
1	2156362	sez_freq	0.0132	15.2	0.206	RP11-181G12.4;SKI	upstream_gene_variant;downstream_gene_variant
1	2156362	seztime	0.0132	-221	0.21	RP11-181G12.4;SKI	upstream_gene_variant;downstream_gene_variant
1	2156362	total_sez_all_types	0.0132	161	0.714	RP11-181G12.4;SKI	upstream_gene_variant;downstream_gene_variant
1	2173504	drug_response	0.0122	1.2	0.132	SKI	intron_variant,non_coding_transcript_variant;intron_variant
1	2173504	headInjury	0.0122	-1.25	0.653	SKI	intron_variant,non_coding_transcript_variant;intron_variant
1	2173504	learningdisability	0.0122	0.151	0.908	SKI	intron_variant,non_coding_transcript_variant;intron_variant
1	2173504	meningitisencephalitis	0.0122	-0.309	0.907	SKI	intron_variant,non_coding_transcript_variant;intron_variant
1	2173504	neurologicaldeficit	0.0122	0.593	0.784	SKI	intron_variant,non_coding_transcript_variant;intron_variant
1	2173504	sez_freq	0.0122	20.8	0.107	SKI	intron_variant,non_coding_transcript_variant;intron_variant
1	2173504	seztime	0.0122	-253	0.182	SKI	intron_variant,non_coding_transcript_variant;intron_variant
1	2173504	total_sez_all_types	0.0122	207	0.662	SKI	intron_variant,non_coding_transcript_variant;intron_variant
1	2176038	drug_response	0.00431	-4.22	0.445	SKI	upstream_gene_variant;intron_variant,non_coding_transcript_variant;intron_variant
1	2176038	headInjury	0.00431	-1.49	0.912	SKI	upstream_gene_variant;intron_variant,non_coding_transcript_variant;intron_variant
1	2176038	learningdisability	0.00431	9.61	0.649	SKI	upstream_gene_variant;intron_variant,non_coding_transcript_variant;intron_variant
1	2176038	meningitisencephalitis	0.00431	6.93	0.806	SKI	upstream_gene_variant;intron_variant,non_coding_transcript_variant;intron_variant
1	2176038	neurologicaldeficit	0.00431	15.2	0.503	SKI	upstream_gene_variant;intron_variant,non_coding_transcript_variant;intron_variant
1	2176038	sez_freq	0.00431	23.2	0.819	SKI	upstream_gene_variant;intron_variant,non_coding_transcript_variant;intron_variant
1	2176038	seztime	0.00431	1230	0.407	SKI	upstream_gene_variant;intron_variant,non_coding_transcript_variant;intron_variant
1	2176038	total_sez_all_types	0.00431	542	0.884	SKI	upstream_gene_variant;intron_variant,non_coding_transcript_variant;intron_variant
1	2176161	drug_response	0.00289	-3.76	0.268	SKI	upstream_gene_variant;intron_variant,non_coding_transcript_variant;intron_variant
1	2176161	headInjury	0.00289	116	0.485	SKI	upstream_gene_variant;intron_variant,non_coding_transcript_variant;intron_variant
1	2176161	learningdisability	0.00289	66.1	0.523	SKI	upstream_gene_variant;intron_variant,non_coding_transcript_variant;intron_variant
1	2176161	meningitisencephalitis	0.00289	44.6	0.712	SKI	upstream_gene_variant;intron_variant,non_coding_transcript_variant;intron_variant
1	2176161	neurologicaldeficit	0.00289	93.3	0.415	SKI	upstream_gene_variant;intron_variant,non_coding_transcript_variant;intron_variant
1	2176161	sez_freq	0.00289	4.54	0.938	SKI	upstream_gene_variant;intron_variant,non_coding_transcript_variant;intron_variant
1	2176161	seztime	0.00289	260	0.761	SKI	upstream_gene_variant;intron_variant,non_coding_transcript_variant;intron_variant
1	2176161	total_sez_all_types	0.00289	4.17	0.998	SKI	upstream_gene_variant;intron_variant,non_coding_transcript_variant;intron_variant
1	2180524	drug_response	0.00708	-1.54	0.296	SKI	intron_variant,non_coding_transcript_variant;intron_variant
1	2180524	headInjury	0.00708	1.07	0.852	SKI	intron_variant,non_coding_transcript_variant;intron_variant
1	2180524	learningdisability	0.00708	0.79	0.845	SKI	intron_variant,non_coding_transcript_variant;intron_variant
1	2180524	meningitisencephalitis	0.00708	0.557	0.915	SKI	intron_variant,non_coding_transcript_variant;intron_variant
1	2180524	neurologicaldeficit	0.00708	2.05	0.626	SKI	intron_variant,non_coding_transcript_variant;intron_variant
1	2180524	sez_freq	0.00708	0.0372	0.999	SKI	intron_variant,non_coding_transcript_variant;intron_variant
1	2180524	seztime	0.00708	606	0.117	SKI	intron_variant,non_coding_transcript_variant;intron_variant
1	2180524	total_sez_all_types	0.00708	52.5	0.957	SKI	intron_variant,non_coding_transcript_variant;intron_variant
1	2182470	drug_response	0.00444	-4.05	0.0831	SKI	intron_variant,non_coding_transcript_variant;intron_variant
1	2182470	headInjury	0.00444	-1.13	0.837	SKI	intron_variant,non_coding_transcript_variant;intron_variant
1	2182470	learningdisability	0.00444	5.83	0.681	SKI	intron_variant,non_coding_transcript_variant;intron_variant
1	2182470	meningitisencephalitis	0.00444	3.88	0.798	SKI	intron_variant,non_coding_transcript_variant;intron_variant
1	2182470	neurologicaldeficit	0.00444	9.91	0.54	SKI	intron_variant,non_coding_transcript_variant;intron_variant
1	2182470	sez_freq	0.00444	6.9	0.827	SKI	intron_variant,non_coding_transcript_variant;intron_variant
1	2182470	seztime	0.00444	466	0.314	SKI	intron_variant,non_coding_transcript_variant;intron_variant
1	2182470	total_sez_all_types	0.00444	15.4	0.989	SKI	intron_variant,non_coding_transcript_variant;intron_variant
1	2192433	drug_response	0.00397	-11.1	0.0792	SKI	intron_variant,non_coding_transcript_variant;intron_variant
1	2192433	headInjury	0.00397	7.01	0.763	SKI	intron_variant,non_coding_transcript_variant;intron_variant
1	2192433	learningdisability	0.00397	1.92	0.897	SKI	intron_variant,non_coding_transcript_variant;intron_variant
1	2192433	meningitisencephalitis	0.00397	0.617	0.974	SKI	intron_variant,non_coding_transcript_variant;intron_variant
1	2192433	neurologicaldeficit	0.00397	5.38	0.699	SKI	intron_variant,non_coding_transcript_variant;intron_variant
1	2192433	sez_freq	0.00397	-9.07	0.924	SKI	intron_variant,non_coding_transcript_variant;intron_variant
1	2192433	seztime	0.00397	2390	0.0872	SKI	intron_variant,non_coding_transcript_variant;intron_variant
1	2192433	total_sez_all_types	0.00397	-201	0.954	SKI	intron_variant,non_coding_transcript_variant;intron_variant
1	2195117	drug_response	0.00559	-1.79	0.347	SKI	intron_variant,non_coding_transcript_variant;intron_variant
1	2195117	headInjury	0.00559	3.53	0.711	SKI	intron_variant,non_coding_transcript_variant;intron_variant
1	2195117	learningdisability	0.00559	2.48	0.748	SKI	intron_variant,non_coding_transcript_variant;intron_variant
1	2195117	meningitisencephalitis	0.00559	905	0.582	SKI	intron_variant,non_coding_transcript_variant;intron_variant
1	2195117	neurologicaldeficit	0.00559	994	0.28	SKI	intron_variant,non_coding_transcript_variant;intron_variant
1	2195117	sez_freq	0.00559	9.42	0.787	SKI	intron_variant,non_coding_transcript_variant;intron_variant
1	2195117	seztime	0.00559	201	0.694	SKI	intron_variant,non_coding_transcript_variant;intron_variant
1	2195117	total_sez_all_types	0.00559	140	0.912	SKI	intron_variant,non_coding_transcript_variant;intron_variant
1	2199057	drug_response	0.0193	0.595	0.157	SKI	intron_variant,non_coding_transcript_variant;intron_variant
1	2199057	headInjury	0.0193	-3.16	0.0259	SKI	intron_variant,non_coding_transcript_variant;intron_variant
1	2199057	learningdisability	0.0193	0.412	0.615	SKI	intron_variant,non_coding_transcript_variant;intron_variant
1	2199057	meningitisencephalitis	0.0193	-3.44	0.0335	SKI	intron_variant,non_coding_transcript_variant;intron_variant
1	2199057	neurologicaldeficit	0.0193	0.184	0.879	SKI	intron_variant,non_coding_transcript_variant;intron_variant
1	2199057	sez_freq	0.0193	-3.85	0.606	SKI	intron_variant,non_coding_transcript_variant;intron_variant
1	2199057	seztime	0.0193	147	0.18	SKI	intron_variant,non_coding_transcript_variant;intron_variant
1	2199057	total_sez_all_types	0.0193	7.84	0.977	SKI	intron_variant,non_coding_transcript_variant;intron_variant
1	2202774	drug_response	0.0202	0.638	0.128	SKI	intron_variant,non_coding_transcript_variant;intron_variant
1	2202774	headInjury	0.0202	-2.45	0.0649	SKI	intron_variant,non_coding_transcript_variant;intron_variant
1	2202774	learningdisability	0.0202	0.344	0.669	SKI	intron_variant,non_coding_transcript_variant;intron_variant
1	2202774	meningitisencephalitis	0.0202	-2.95	0.0535	SKI	intron_variant,non_coding_transcript_variant;intron_variant
1	2202774	neurologicaldeficit	0.0202	0.197	0.866	SKI	intron_variant,non_coding_transcript_variant;intron_variant
1	2202774	sez_freq	0.0202	-3.37	0.646	SKI	intron_variant,non_coding_transcript_variant;intron_variant
1	2202774	seztime	0.0202	168	0.119	SKI	intron_variant,non_coding_transcript_variant;intron_variant
1	2202774	total_sez_all_types	0.0202	10.1	0.97	SKI	intron_variant,non_coding_transcript_variant;intron_variant
1	2204755	drug_response	0.0229	0.604	0.122	SKI	intron_variant,non_coding_transcript_variant;intron_variant
1	2204755	headInjury	0.0229	-2.91	0.0225	SKI	intron_variant,non_coding_transcript_variant;intron_variant
1	2204755	learningdisability	0.0229	0.236	0.767	SKI	intron_variant,non_coding_transcript_variant;intron_variant
1	2204755	meningitisencephalitis	0.0229	-3.1	0.0431	SKI	intron_variant,non_coding_transcript_variant;intron_variant
1	2204755	neurologicaldeficit	0.0229	-0.0703	0.951	SKI	intron_variant,non_coding_transcript_variant;intron_variant
1	2204755	sez_freq	0.0229	-3.21	0.641	SKI	intron_variant,non_coding_transcript_variant;intron_variant
1	2204755	seztime	0.0229	215	0.0334	SKI	intron_variant,non_coding_transcript_variant;intron_variant
1	2204755	total_sez_all_types	0.0229	-0.563	0.998	SKI	intron_variant,non_coding_transcript_variant;intron_variant
1	2204790	drug_response	0.0234	0.651	0.0736	SKI	intron_variant,non_coding_transcript_variant;intron_variant
1	2204790	headInjury	0.0234	-2.52	0.0448	SKI	intron_variant,non_coding_transcript_variant;intron_variant
1	2204790	learningdisability	0.0234	0.141	0.849	SKI	intron_variant,non_coding_transcript_variant;intron_variant
1	2204790	meningitisencephalitis	0.0234	-2.88	0.0502	SKI	intron_variant,non_coding_transcript_variant;intron_variant
1	2204790	neurologicaldeficit	0.0234	-0.185	0.864	SKI	intron_variant,non_coding_transcript_variant;intron_variant
1	2204790	sez_freq	0.0234	-3.45	0.59	SKI	intron_variant,non_coding_transcript_variant;intron_variant
1	2204790	seztime	0.0234	132	0.161	SKI	intron_variant,non_coding_transcript_variant;intron_variant
1	2204790	total_sez_all_types	0.0234	-11.2	0.962	SKI	intron_variant,non_coding_transcript_variant;intron_variant
1	2211849	drug_response	0.0167	0.54	0.235	SKI	intron_variant,non_coding_transcript_variant;intron_variant
1	2211849	headInjury	0.0167	-3.27	0.0173	SKI	intron_variant,non_coding_transcript_variant;intron_variant
1	2211849	learningdisability	0.0167	0.562	0.497	SKI	intron_variant,non_coding_transcript_variant;intron_variant
1	2211849	meningitisencephalitis	0.0167	-2.95	0.0753	SKI	intron_variant,non_coding_transcript_variant;intron_variant
1	2211849	neurologicaldeficit	0.0167	0.0852	0.948	SKI	intron_variant,non_coding_transcript_variant;intron_variant
1	2211849	sez_freq	0.0167	-4.04	0.617	SKI	intron_variant,non_coding_transcript_variant;intron_variant
1	2211849	seztime	0.0167	268	0.0233	SKI	intron_variant,non_coding_transcript_variant;intron_variant
1	2211849	total_sez_all_types	0.0167	-30.2	0.919	SKI	intron_variant,non_coding_transcript_variant;intron_variant
1	2218100	drug_response	0.0202	0.464	0.265	SKI	intron_variant,non_coding_transcript_variant;intron_variant
1	2218100	headInjury	0.0202	-4	0.00113	SKI	intron_variant,non_coding_transcript_variant;intron_variant
1	2218100	learningdisability	0.0202	0.289	0.732	SKI	intron_variant,non_coding_transcript_variant;intron_variant
1	2218100	meningitisencephalitis	0.0202	-3.29	0.0365	SKI	intron_variant,non_coding_transcript_variant;intron_variant
1	2218100	neurologicaldeficit	0.0202	0.232	0.846	SKI	intron_variant,non_coding_transcript_variant;intron_variant
1	2218100	sez_freq	0.0202	-1.55	0.835	SKI	intron_variant,non_coding_transcript_variant;intron_variant
1	2218100	seztime	0.0202	224	0.0392	SKI	intron_variant,non_coding_transcript_variant;intron_variant
1	2218100	total_sez_all_types	0.0202	39.1	0.886	SKI	intron_variant,non_coding_transcript_variant;intron_variant
1	2220649	drug_response	0.017	0.544	0.276	SKI	intron_variant,non_coding_transcript_variant;intron_variant
1	2220649	headInjury	0.017	-6.49	1.43e-05	SKI	intron_variant,non_coding_transcript_variant;intron_variant
1	2220649	learningdisability	0.017	0.394	0.676	SKI	intron_variant,non_coding_transcript_variant;intron_variant
1	2220649	meningitisencephalitis	0.017	-1.87	0.477	SKI	intron_variant,non_coding_transcript_variant;intron_variant
1	2220649	neurologicaldeficit	0.017	-0.116	0.941	SKI	intron_variant,non_coding_transcript_variant;intron_variant
1	2220649	sez_freq	0.017	-3.09	0.728	SKI	intron_variant,non_coding_transcript_variant;intron_variant
1	2220649	seztime	0.017	234	0.0722	SKI	intron_variant,non_coding_transcript_variant;intron_variant
1	2220649	total_sez_all_types	0.017	32.2	0.921	SKI	intron_variant,non_coding_transcript_variant;intron_variant
1	2221222	drug_response	0.0162	0.641	0.198	SKI	intron_variant,non_coding_transcript_variant;intron_variant
1	2221222	headInjury	0.0162	-7.15	8.04e-06	SKI	intron_variant,non_coding_transcript_variant;intron_variant
1	2221222	learningdisability	0.0162	0.334	0.726	SKI	intron_variant,non_coding_transcript_variant;intron_variant
1	2221222	meningitisencephalitis	0.0162	-1.12	0.647	SKI	intron_variant,non_coding_transcript_variant;intron_variant
1	2221222	neurologicaldeficit	0.0162	-0.28	0.862	SKI	intron_variant,non_coding_transcript_variant;intron_variant
1	2221222	sez_freq	0.0162	-2.49	0.778	SKI	intron_variant,non_coding_transcript_variant;intron_variant
1	2221222	seztime	0.0162	236	0.0676	SKI	intron_variant,non_coding_transcript_variant;intron_variant
1	2221222	total_sez_all_types	0.0162	35.4	0.913	SKI	intron_variant,non_coding_transcript_variant;intron_variant
1	2222583	drug_response	0.0122	0.128	0.839	SKI	intron_variant,non_coding_transcript_variant;intron_variant
1	2222583	headInjury	0.0122	-6	7.78e-05	SKI	intron_variant,non_coding_transcript_variant;intron_variant
1	2222583	learningdisability	0.0122	-0.435	0.76	SKI	intron_variant,non_coding_transcript_variant;intron_variant
1	2222583	meningitisencephalitis	0.0122	-3.63	0.0651	SKI	intron_variant,non_coding_transcript_variant;intron_variant
1	2222583	neurologicaldeficit	0.0122	0.162	0.928	SKI	intron_variant,non_coding_transcript_variant;intron_variant
1	2222583	sez_freq	0.0122	-1.68	0.883	SKI	intron_variant,non_coding_transcript_variant;intron_variant
1	2222583	seztime	0.0122	449	0.007	SKI	intron_variant,non_coding_transcript_variant;intron_variant
1	2222583	total_sez_all_types	0.0122	40.4	0.923	SKI	intron_variant,non_coding_transcript_variant;intron_variant
1	2223645	drug_response	0.00783	0.174	0.822	SKI	intron_variant,non_coding_transcript_variant;intron_variant
1	2223645	headInjury	0.00783	-6.41	0.0038	SKI	intron_variant,non_coding_transcript_variant;intron_variant
1	2223645	learningdisability	0.00783	-0.333	0.85	SKI	intron_variant,non_coding_transcript_variant;intron_variant
1	2223645	meningitisencephalitis	0.00783	-0.888	0.8	SKI	intron_variant,non_coding_transcript_variant;intron_variant
1	2223645	neurologicaldeficit	0.00783	-0.0178	0.994	SKI	intron_variant,non_coding_transcript_variant;intron_variant
1	2223645	sez_freq	0.00783	1.57	0.912	SKI	intron_variant,non_coding_transcript_variant;intron_variant
1	2223645	seztime	0.00783	541	0.00882	SKI	intron_variant,non_coding_transcript_variant;intron_variant
1	2223645	total_sez_all_types	0.00783	73.1	0.888	SKI	intron_variant,non_coding_transcript_variant;intron_variant
1	2223866	drug_response	0.0105	0.27	0.673	SKI	intron_variant,non_coding_transcript_variant;intron_variant
1	2223866	headInjury	0.0105	-10.1	0.000302	SKI	intron_variant,non_coding_transcript_variant;intron_variant
1	2223866	learningdisability	0.0105	0.746	0.464	SKI	intron_variant,non_coding_transcript_variant;intron_variant
1	2223866	meningitisencephalitis	0.0105	-1.05	0.737	SKI	intron_variant,non_coding_transcript_variant;intron_variant
1	2223866	neurologicaldeficit	0.0105	-0.0605	0.976	SKI	intron_variant,non_coding_transcript_variant;intron_variant
1	2223866	sez_freq	0.0105	1.55	0.895	SKI	intron_variant,non_coding_transcript_variant;intron_variant
1	2223866	seztime	0.0105	395	0.0209	SKI	intron_variant,non_coding_transcript_variant;intron_variant
1	2223866	total_sez_all_types	0.0105	75.2	0.861	SKI	intron_variant,non_coding_transcript_variant;intron_variant
1	2224836	drug_response	0.0138	0.13	0.818	SKI	intron_variant,non_coding_transcript_variant;intron_variant
1	2224836	headInjury	0.0138	-4.48	0.00273	SKI	intron_variant,non_coding_transcript_variant;intron_variant
1	2224836	learningdisability	0.0138	0.74	0.453	SKI	intron_variant,non_coding_transcript_variant;intron_variant
1	2224836	meningitisencephalitis	0.0138	-0.602	0.81	SKI	intron_variant,non_coding_transcript_variant;intron_variant
1	2224836	neurologicaldeficit	0.0138	0.109	0.949	SKI	intron_variant,non_coding_transcript_variant;intron_variant
1	2224836	sez_freq	0.0138	-2.41	0.813	SKI	intron_variant,non_coding_transcript_variant;intron_variant
1	2224836	seztime	0.0138	436	0.00334	SKI	intron_variant,non_coding_transcript_variant;intron_variant
1	2224836	total_sez_all_types	0.0138	35	0.925	SKI	intron_variant,non_coding_transcript_variant;intron_variant
1	2224876	drug_response	0.00826	-0.132	0.848	SKI	intron_variant,non_coding_transcript_variant;intron_variant
1	2224876	headInjury	0.00826	-4.36	0.00283	SKI	intron_variant,non_coding_transcript_variant;intron_variant
1	2224876	learningdisability	0.00826	0.368	0.787	SKI	intron_variant,non_coding_transcript_variant;intron_variant
1	2224876	meningitisencephalitis	0.00826	-2.46	0.332	SKI	intron_variant,non_coding_transcript_variant;intron_variant
1	2224876	neurologicaldeficit	0.00826	0.25	0.893	SKI	intron_variant,non_coding_transcript_variant;intron_variant
1	2224876	sez_freq	0.00826	-1.43	0.907	SKI	intron_variant,non_coding_transcript_variant;intron_variant
1	2224876	seztime	0.00826	506	0.00491	SKI	intron_variant,non_coding_transcript_variant;intron_variant
1	2224876	total_sez_all_types	0.00826	53.9	0.905	SKI	intron_variant,non_coding_transcript_variant;intron_variant
1	2231463	drug_response	0.014	0.058	0.909	SKI	intron_variant,non_coding_transcript_variant;intron_variant;upstream_gene_variant
1	2231463	headInjury	0.014	-3.91	0.00351	SKI	intron_variant,non_coding_transcript_variant;intron_variant;upstream_gene_variant
1	2231463	learningdisability	0.014	0.761	0.403	SKI	intron_variant,non_coding_transcript_variant;intron_variant;upstream_gene_variant
1	2231463	meningitisencephalitis	0.014	-1.83	0.403	SKI	intron_variant,non_coding_transcript_variant;intron_variant;upstream_gene_variant
1	2231463	neurologicaldeficit	0.014	0.423	0.752	SKI	intron_variant,non_coding_transcript_variant;intron_variant;upstream_gene_variant
1	2231463	sez_freq	0.014	-1.58	0.861	SKI	intron_variant,non_coding_transcript_variant;intron_variant;upstream_gene_variant
1	2231463	seztime	0.014	222	0.0936	SKI	intron_variant,non_coding_transcript_variant;intron_variant;upstream_gene_variant
1	2231463	total_sez_all_types	0.014	71.5	0.829	SKI	intron_variant,non_coding_transcript_variant;intron_variant;upstream_gene_variant
1	2231595	drug_response	0.01	0.185	0.722	SKI	intron_variant,non_coding_transcript_variant;intron_variant;upstream_gene_variant
1	2231595	headInjury	0.01	-3.23	0.0173	SKI	intron_variant,non_coding_transcript_variant;intron_variant;upstream_gene_variant
1	2231595	learningdisability	0.01	0.515	0.632	SKI	intron_variant,non_coding_transcript_variant;intron_variant;upstream_gene_variant
1	2231595	meningitisencephalitis	0.01	-3.24	0.0484	SKI	intron_variant,non_coding_transcript_variant;intron_variant;upstream_gene_variant
1	2231595	neurologicaldeficit	0.01	0.833	0.49	SKI	intron_variant,non_coding_transcript_variant;intron_variant;upstream_gene_variant
1	2231595	sez_freq	0.01	-1.59	0.865	SKI	intron_variant,non_coding_transcript_variant;intron_variant;upstream_gene_variant
1	2231595	seztime	0.01	260	0.0573	SKI	intron_variant,non_coding_transcript_variant;intron_variant;upstream_gene_variant
1	2231595	total_sez_all_types	0.01	71.4	0.835	SKI	intron_variant,non_coding_transcript_variant;intron_variant;upstream_gene_variant
1	2234632	drug_response	0.00625	-0.122	0.882	SKI	intron_variant,non_coding_transcript_variant;downstream_gene_variant;intron_variant;upstream_gene_variant
1	2234632	headInjury	0.00625	-4.06	0.00474	SKI	intron_variant,non_coding_transcript_variant;downstream_gene_variant;intron_variant;upstream_gene_variant
1	2234632	learningdisability	0.00625	-1.65	0.263	SKI	intron_variant,non_coding_transcript_variant;downstream_gene_variant;intron_variant;upstream_gene_variant
1	2234632	meningitisencephalitis	0.00625	-4.27	0.0184	SKI	intron_variant,non_coding_transcript_variant;downstream_gene_variant;intron_variant;upstream_gene_variant
1	2234632	neurologicaldeficit	0.00625	0.641	0.766	SKI	intron_variant,non_coding_transcript_variant;downstream_gene_variant;intron_variant;upstream_gene_variant
1	2234632	sez_freq	0.00625	1.18	0.937	SKI	intron_variant,non_coding_transcript_variant;downstream_gene_variant;intron_variant;upstream_gene_variant
1	2234632	seztime	0.00625	387	0.0752	SKI	intron_variant,non_coding_transcript_variant;downstream_gene_variant;intron_variant;upstream_gene_variant
1	2234632	total_sez_all_types	0.00625	110	0.84	SKI	intron_variant,non_coding_transcript_variant;downstream_gene_variant;intron_variant;upstream_gene_variant
1	2236697	drug_response	0.00741	-0.338	0.55	SKI	downstream_gene_variant;intron_variant
1	2236697	headInjury	0.00741	-3.04	0.00985	SKI	downstream_gene_variant;intron_variant
1	2236697	learningdisability	0.00741	-1.4	0.257	SKI	downstream_gene_variant;intron_variant
1	2236697	meningitisencephalitis	0.00741	-2.61	0.101	SKI	downstream_gene_variant;intron_variant
1	2236697	neurologicaldeficit	0.00741	0.802	0.528	SKI	downstream_gene_variant;intron_variant
1	2236697	sez_freq	0.00741	1.36	0.89	SKI	downstream_gene_variant;intron_variant
1	2236697	seztime	0.00741	348	0.0157	SKI	downstream_gene_variant;intron_variant
1	2236697	total_sez_all_types	0.00741	90.1	0.803	SKI	downstream_gene_variant;intron_variant
1	2240006	drug_response	0.00444	-0.654	0.477	SKI	3_prime_UTR_variant;downstream_gene_variant
1	2240006	headInjury	0.00444	-3.72	0.00391	SKI	3_prime_UTR_variant;downstream_gene_variant
1	2240006	learningdisability	0.00444	-1.69	0.232	SKI	3_prime_UTR_variant;downstream_gene_variant
1	2240006	meningitisencephalitis	0.00444	-2.98	0.146	SKI	3_prime_UTR_variant;downstream_gene_variant
1	2240006	neurologicaldeficit	0.00444	1.91	0.55	SKI	3_prime_UTR_variant;downstream_gene_variant
1	2240006	sez_freq	0.00444	3.68	0.825	SKI	3_prime_UTR_variant;downstream_gene_variant
1	2240006	seztime	0.00444	77.6	0.752	SKI	3_prime_UTR_variant;downstream_gene_variant
1	2240006	total_sez_all_types	0.00444	148	0.809	SKI	3_prime_UTR_variant;downstream_gene_variant
1	2240383	drug_response	0.0146	-0.288	0.52	SKI	3_prime_UTR_variant;downstream_gene_variant
1	2240383	headInjury	0.0146	-2.04	0.0592	SKI	3_prime_UTR_variant;downstream_gene_variant
1	2240383	learningdisability	0.0146	-0.431	0.678	SKI	3_prime_UTR_variant;downstream_gene_variant
1	2240383	meningitisencephalitis	0.0146	-2.3	0.102	SKI	3_prime_UTR_variant;downstream_gene_variant
1	2240383	neurologicaldeficit	0.0146	1.32	0.163	SKI	3_prime_UTR_variant;downstream_gene_variant
1	2240383	sez_freq	0.0146	-1.64	0.835	SKI	3_prime_UTR_variant;downstream_gene_variant
1	2240383	seztime	0.0146	217	0.0595	SKI	3_prime_UTR_variant;downstream_gene_variant
1	2240383	total_sez_all_types	0.0146	56.1	0.846	SKI	3_prime_UTR_variant;downstream_gene_variant
1	2261222	drug_response	0.0132	-0.411	0.395	RP4-713A8.1;AL589739.1;MORN1	downstream_gene_variant;intron_variant;upstream_gene_variant
1	2261222	headInjury	0.0132	-2.19	0.041	RP4-713A8.1;AL589739.1;MORN1	downstream_gene_variant;intron_variant;upstream_gene_variant
1	2261222	learningdisability	0.0132	-0.47	0.679	RP4-713A8.1;AL589739.1;MORN1	downstream_gene_variant;intron_variant;upstream_gene_variant
1	2261222	meningitisencephalitis	0.0132	-2.45	0.073	RP4-713A8.1;AL589739.1;MORN1	downstream_gene_variant;intron_variant;upstream_gene_variant
1	2261222	neurologicaldeficit	0.0132	1.3	0.2	RP4-713A8.1;AL589739.1;MORN1	downstream_gene_variant;intron_variant;upstream_gene_variant
1	2261222	sez_freq	0.0132	-2.62	0.757	RP4-713A8.1;AL589739.1;MORN1	downstream_gene_variant;intron_variant;upstream_gene_variant
1	2261222	seztime	0.0132	265	0.0325	RP4-713A8.1;AL589739.1;MORN1	downstream_gene_variant;intron_variant;upstream_gene_variant
1	2261222	total_sez_all_types	0.0132	18.8	0.952	RP4-713A8.1;AL589739.1;MORN1	downstream_gene_variant;intron_variant;upstream_gene_variant
1	2263888	drug_response	0.0131	-0.512	0.292	AL589739.1;MORN1	downstream_gene_variant;intron_variant;non_coding_transcript_exon_variant
1	2263888	headInjury	0.0131	-2.31	0.0323	AL589739.1;MORN1	downstream_gene_variant;intron_variant;non_coding_transcript_exon_variant
1	2263888	learningdisability	0.0131	-0.777	0.484	AL589739.1;MORN1	downstream_gene_variant;intron_variant;non_coding_transcript_exon_variant
1	2263888	meningitisencephalitis	0.0131	-2.13	0.149	AL589739.1;MORN1	downstream_gene_variant;intron_variant;non_coding_transcript_exon_variant
1	2263888	neurologicaldeficit	0.0131	1.41	0.144	AL589739.1;MORN1	downstream_gene_variant;intron_variant;non_coding_transcript_exon_variant
1	2263888	sez_freq	0.0131	-2.56	0.76	AL589739.1;MORN1	downstream_gene_variant;intron_variant;non_coding_transcript_exon_variant
1	2263888	seztime	0.0131	279	0.0227	AL589739.1;MORN1	downstream_gene_variant;intron_variant;non_coding_transcript_exon_variant
1	2263888	total_sez_all_types	0.0131	17.2	0.955	AL589739.1;MORN1	downstream_gene_variant;intron_variant;non_coding_transcript_exon_variant
1	2269948	drug_response	0.00276	-2.62	0.109	MORN1	intron_variant,non_coding_transcript_variant;intron_variant
1	2269948	headInjury	0.00276	0.613	0.908	MORN1	intron_variant,non_coding_transcript_variant;intron_variant
1	2269948	learningdisability	0.00276	0.0671	0.985	MORN1	intron_variant,non_coding_transcript_variant;intron_variant
1	2269948	meningitisencephalitis	0.00276	-0.0941	0.984	MORN1	intron_variant,non_coding_transcript_variant;intron_variant
1	2269948	neurologicaldeficit	0.00276	3.11	0.279	MORN1	intron_variant,non_coding_transcript_variant;intron_variant
1	2269948	sez_freq	0.00276	-6.64	0.796	MORN1	intron_variant,non_coding_transcript_variant;intron_variant
1	2269948	seztime	0.00276	609	0.106	MORN1	intron_variant,non_coding_transcript_variant;intron_variant
1	2269948	total_sez_all_types	0.00276	-51.2	0.957	MORN1	intron_variant,non_coding_transcript_variant;intron_variant
1	2270098	drug_response	0.00562	-0.799	0.467	MORN1	intron_variant,non_coding_transcript_variant;intron_variant
1	2270098	headInjury	0.00562	-1.07	0.703	MORN1	intron_variant,non_coding_transcript_variant;intron_variant
1	2270098	learningdisability	0.00562	2.03	0.435	MORN1	intron_variant,non_coding_transcript_variant;intron_variant
1	2270098	meningitisencephalitis	0.00562	0.607	0.874	MORN1	intron_variant,non_coding_transcript_variant;intron_variant
1	2270098	neurologicaldeficit	0.00562	3.27	0.172	MORN1	intron_variant,non_coding_transcript_variant;intron_variant
1	2270098	sez_freq	0.00562	-2.44	0.902	MORN1	intron_variant,non_coding_transcript_variant;intron_variant
1	2270098	seztime	0.00562	-0.225	0.999	MORN1	intron_variant,non_coding_transcript_variant;intron_variant
1	2270098	total_sez_all_types	0.00562	12.1	0.987	MORN1	intron_variant,non_coding_transcript_variant;intron_variant
1	2280661	drug_response	0.00476	-2.13	0.124	RP4-740C4.6;RP4-740C4.5;MORN1	downstream_gene_variant;intron_variant,non_coding_transcript_variant;intron_variant
1	2280661	headInjury	0.00476	-0.561	0.881	RP4-740C4.6;RP4-740C4.5;MORN1	downstream_gene_variant;intron_variant,non_coding_transcript_variant;intron_variant
1	2280661	learningdisability	0.00476	0.538	0.866	RP4-740C4.6;RP4-740C4.5;MORN1	downstream_gene_variant;intron_variant,non_coding_transcript_variant;intron_variant
1	2280661	meningitisencephalitis	0.00476	0.317	0.939	RP4-740C4.6;RP4-740C4.5;MORN1	downstream_gene_variant;intron_variant,non_coding_transcript_variant;intron_variant
1	2280661	neurologicaldeficit	0.00476	2.93	0.256	RP4-740C4.6;RP4-740C4.5;MORN1	downstream_gene_variant;intron_variant,non_coding_transcript_variant;intron_variant
1	2280661	sez_freq	0.00476	-6.6	0.773	RP4-740C4.6;RP4-740C4.5;MORN1	downstream_gene_variant;intron_variant,non_coding_transcript_variant;intron_variant
1	2280661	seztime	0.00476	568	0.0905	RP4-740C4.6;RP4-740C4.5;MORN1	downstream_gene_variant;intron_variant,non_coding_transcript_variant;intron_variant
1	2280661	total_sez_all_types	0.00476	-33.2	0.968	RP4-740C4.6;RP4-740C4.5;MORN1	downstream_gene_variant;intron_variant,non_coding_transcript_variant;intron_variant
1	2281726	drug_response	0.00255	-1.23	0.464	RP4-740C4.6;RP4-740C4.5;MORN1	downstream_gene_variant;intron_variant,non_coding_transcript_variant;intron_variant
1	2281726	headInjury	0.00255	-1.52	0.696	RP4-740C4.6;RP4-740C4.5;MORN1	downstream_gene_variant;intron_variant,non_coding_transcript_variant;intron_variant
1	2281726	learningdisability	0.00255	5.76	0.651	RP4-740C4.6;RP4-740C4.5;MORN1	downstream_gene_variant;intron_variant,non_coding_transcript_variant;intron_variant
1	2281726	meningitisencephalitis	0.00255	0.613	0.933	RP4-740C4.6;RP4-740C4.5;MORN1	downstream_gene_variant;intron_variant,non_coding_transcript_variant;intron_variant
1	2281726	neurologicaldeficit	0.00255	25.3	0.217	RP4-740C4.6;RP4-740C4.5;MORN1	downstream_gene_variant;intron_variant,non_coding_transcript_variant;intron_variant
1	2281726	sez_freq	0.00255	7.04	0.82	RP4-740C4.6;RP4-740C4.5;MORN1	downstream_gene_variant;intron_variant,non_coding_transcript_variant;intron_variant
1	2281726	seztime	0.00255	-635	0.16	RP4-740C4.6;RP4-740C4.5;MORN1	downstream_gene_variant;intron_variant,non_coding_transcript_variant;intron_variant
1	2281726	total_sez_all_types	0.00255	174	0.877	RP4-740C4.6;RP4-740C4.5;MORN1	downstream_gene_variant;intron_variant,non_coding_transcript_variant;intron_variant
1	2283117	drug_response	0.00375	-4.79	0.0617	RP4-740C4.6;RP4-740C4.5;MORN1	downstream_gene_variant;intron_variant,non_coding_transcript_variant;intron_variant;non_coding_transcript_exon_variant
1	2283117	headInjury	0.00375	0.352	0.951	RP4-740C4.6;RP4-740C4.5;MORN1	downstream_gene_variant;intron_variant,non_coding_transcript_variant;intron_variant;non_coding_transcript_exon_variant
1	2283117	learningdisability	0.00375	0.26	0.949	RP4-740C4.6;RP4-740C4.5;MORN1	downstream_gene_variant;intron_variant,non_coding_transcript_variant;intron_variant;non_coding_transcript_exon_variant
1	2283117	meningitisencephalitis	0.00375	0.326	0.955	RP4-740C4.6;RP4-740C4.5;MORN1	downstream_gene_variant;intron_variant,non_coding_transcript_variant;intron_variant;non_coding_transcript_exon_variant
1	2283117	neurologicaldeficit	0.00375	1.2	0.775	RP4-740C4.6;RP4-740C4.5;MORN1	downstream_gene_variant;intron_variant,non_coding_transcript_variant;intron_variant;non_coding_transcript_exon_variant
1	2283117	sez_freq	0.00375	-4.57	0.876	RP4-740C4.6;RP4-740C4.5;MORN1	downstream_gene_variant;intron_variant,non_coding_transcript_variant;intron_variant;non_coding_transcript_exon_variant
1	2283117	seztime	0.00375	891	0.0371	RP4-740C4.6;RP4-740C4.5;MORN1	downstream_gene_variant;intron_variant,non_coding_transcript_variant;intron_variant;non_coding_transcript_exon_variant
1	2283117	total_sez_all_types	0.00375	-26.3	0.98	RP4-740C4.6;RP4-740C4.5;MORN1	downstream_gene_variant;intron_variant,non_coding_transcript_variant;intron_variant;non_coding_transcript_exon_variant
1	2283896	drug_response	0.00988	-0.541	0.422	RP4-740C4.6;RP4-740C4.5;MORN1	upstream_gene_variant;intron_variant,non_coding_transcript_variant;downstream_gene_variant;intron_variant;non_coding_transcript_exon_variant
1	2283896	headInjury	0.00988	1.91	0.522	RP4-740C4.6;RP4-740C4.5;MORN1	upstream_gene_variant;intron_variant,non_coding_transcript_variant;downstream_gene_variant;intron_variant;non_coding_transcript_exon_variant
1	2283896	learningdisability	0.00988	1.08	0.586	RP4-740C4.6;RP4-740C4.5;MORN1	upstream_gene_variant;intron_variant,non_coding_transcript_variant;downstream_gene_variant;intron_variant;non_coding_transcript_exon_variant
1	2283896	meningitisencephalitis	0.00988	-3.19	0.00982	RP4-740C4.6;RP4-740C4.5;MORN1	upstream_gene_variant;intron_variant,non_coding_transcript_variant;downstream_gene_variant;intron_variant;non_coding_transcript_exon_variant
1	2283896	neurologicaldeficit	0.00988	0.228	0.882	RP4-740C4.6;RP4-740C4.5;MORN1	upstream_gene_variant;intron_variant,non_coding_transcript_variant;downstream_gene_variant;intron_variant;non_coding_transcript_exon_variant
1	2283896	sez_freq	0.00988	4.02	0.742	RP4-740C4.6;RP4-740C4.5;MORN1	upstream_gene_variant;intron_variant,non_coding_transcript_variant;downstream_gene_variant;intron_variant;non_coding_transcript_exon_variant
1	2283896	seztime	0.00988	124	0.491	RP4-740C4.6;RP4-740C4.5;MORN1	upstream_gene_variant;intron_variant,non_coding_transcript_variant;downstream_gene_variant;intron_variant;non_coding_transcript_exon_variant
1	2283896	total_sez_all_types	0.00988	88.6	0.843	RP4-740C4.6;RP4-740C4.5;MORN1	upstream_gene_variant;intron_variant,non_coding_transcript_variant;downstream_gene_variant;intron_variant;non_coding_transcript_exon_variant
1	2285730	drug_response	0.00713	-0.293	0.72	RP4-740C4.6;RP4-740C4.5;MORN1	downstream_gene_variant;intron_variant,non_coding_transcript_variant;intron_variant;upstream_gene_variant
1	2285730	headInjury	0.00713	2.3	0.526	RP4-740C4.6;RP4-740C4.5;MORN1	downstream_gene_variant;intron_variant,non_coding_transcript_variant;intron_variant;upstream_gene_variant
1	2285730	learningdisability	0.00713	1.61	0.485	RP4-740C4.6;RP4-740C4.5;MORN1	downstream_gene_variant;intron_variant,non_coding_transcript_variant;intron_variant;upstream_gene_variant
1	2285730	meningitisencephalitis	0.00713	-3.91	0.0102	RP4-740C4.6;RP4-740C4.5;MORN1	downstream_gene_variant;intron_variant,non_coding_transcript_variant;intron_variant;upstream_gene_variant
1	2285730	neurologicaldeficit	0.00713	0.223	0.911	RP4-740C4.6;RP4-740C4.5;MORN1	downstream_gene_variant;intron_variant,non_coding_transcript_variant;intron_variant;upstream_gene_variant
1	2285730	sez_freq	0.00713	3.53	0.811	RP4-740C4.6;RP4-740C4.5;MORN1	downstream_gene_variant;intron_variant,non_coding_transcript_variant;intron_variant;upstream_gene_variant
1	2285730	seztime	0.00713	328	0.129	RP4-740C4.6;RP4-740C4.5;MORN1	downstream_gene_variant;intron_variant,non_coding_transcript_variant;intron_variant;upstream_gene_variant
1	2285730	total_sez_all_types	0.00713	52.6	0.922	RP4-740C4.6;RP4-740C4.5;MORN1	downstream_gene_variant;intron_variant,non_coding_transcript_variant;intron_variant;upstream_gene_variant
1	2287616	drug_response	0.0101	-0.735	0.26	RP4-740C4.6;RP4-740C4.5;MORN1	upstream_gene_variant;intron_variant,non_coding_transcript_variant;intron_variant;downstream_gene_variant
1	2287616	headInjury	0.0101	1.82	0.506	RP4-740C4.6;RP4-740C4.5;MORN1	upstream_gene_variant;intron_variant,non_coding_transcript_variant;intron_variant;downstream_gene_variant
1	2287616	learningdisability	0.0101	1.3	0.521	RP4-740C4.6;RP4-740C4.5;MORN1	upstream_gene_variant;intron_variant,non_coding_transcript_variant;intron_variant;downstream_gene_variant
1	2287616	meningitisencephalitis	0.0101	-3.04	0.0159	RP4-740C4.6;RP4-740C4.5;MORN1	upstream_gene_variant;intron_variant,non_coding_transcript_variant;intron_variant;downstream_gene_variant
1	2287616	neurologicaldeficit	0.0101	0.636	0.664	RP4-740C4.6;RP4-740C4.5;MORN1	upstream_gene_variant;intron_variant,non_coding_transcript_variant;intron_variant;downstream_gene_variant
1	2287616	sez_freq	0.0101	4.37	0.712	RP4-740C4.6;RP4-740C4.5;MORN1	upstream_gene_variant;intron_variant,non_coding_transcript_variant;intron_variant;downstream_gene_variant
1	2287616	seztime	0.0101	157	0.365	RP4-740C4.6;RP4-740C4.5;MORN1	upstream_gene_variant;intron_variant,non_coding_transcript_variant;intron_variant;downstream_gene_variant
1	2287616	total_sez_all_types	0.0101	117	0.788	RP4-740C4.6;RP4-740C4.5;MORN1	upstream_gene_variant;intron_variant,non_coding_transcript_variant;intron_variant;downstream_gene_variant
1	2289321	drug_response	0.0102	-0.537	0.422	MORN1	intron_variant,non_coding_transcript_variant;downstream_gene_variant;intron_variant
1	2289321	headInjury	0.0102	0.61	0.799	MORN1	intron_variant,non_coding_transcript_variant;downstream_gene_variant;intron_variant
1	2289321	learningdisability	0.0102	1.62	0.41	MORN1	intron_variant,non_coding_transcript_variant;downstream_gene_variant;intron_variant
1	2289321	meningitisencephalitis	0.0102	-3.35	0.00698	MORN1	intron_variant,non_coding_transcript_variant;downstream_gene_variant;intron_variant
1	2289321	neurologicaldeficit	0.0102	0.545	0.735	MORN1	intron_variant,non_coding_transcript_variant;downstream_gene_variant;intron_variant
1	2289321	sez_freq	0.0102	2.6	0.83	MORN1	intron_variant,non_coding_transcript_variant;downstream_gene_variant;intron_variant
1	2289321	seztime	0.0102	99.8	0.576	MORN1	intron_variant,non_coding_transcript_variant;downstream_gene_variant;intron_variant
1	2289321	total_sez_all_types	0.0102	71.4	0.873	MORN1	intron_variant,non_coding_transcript_variant;downstream_gene_variant;intron_variant
1	2291680	drug_response	0.000955	-20	0.333	RP4-740C4.7;MORN1	intron_variant,non_coding_transcript_variant;downstream_gene_variant;intron_variant
1	2291680	headInjury	0.000955	19.5	0.77	RP4-740C4.7;MORN1	intron_variant,non_coding_transcript_variant;downstream_gene_variant;intron_variant
1	2291680	learningdisability	0.000955	-7.43	0.881	RP4-740C4.7;MORN1	intron_variant,non_coding_transcript_variant;downstream_gene_variant;intron_variant
1	2291680	meningitisencephalitis	0.000955	-83.6	0.119	RP4-740C4.7;MORN1	intron_variant,non_coding_transcript_variant;downstream_gene_variant;intron_variant
1	2291680	neurologicaldeficit	0.000955	-76.2	0.0438	RP4-740C4.7;MORN1	intron_variant,non_coding_transcript_variant;downstream_gene_variant;intron_variant
1	2291680	sez_freq	0.000955	189	0.593	RP4-740C4.7;MORN1	intron_variant,non_coding_transcript_variant;downstream_gene_variant;intron_variant
1	2291680	seztime	0.000955	8060	0.119	RP4-740C4.7;MORN1	intron_variant,non_coding_transcript_variant;downstream_gene_variant;intron_variant
1	2291680	total_sez_all_types	0.000955	2490	0.847	RP4-740C4.7;MORN1	intron_variant,non_coding_transcript_variant;downstream_gene_variant;intron_variant
1	2292352	drug_response	0.00169	-75	0.0531	RP4-740C4.7;MORN1	intron_variant,non_coding_transcript_variant;downstream_gene_variant;intron_variant
1	2292352	headInjury	0.00169	-8.54	0.818	RP4-740C4.7;MORN1	intron_variant,non_coding_transcript_variant;downstream_gene_variant;intron_variant
1	2292352	learningdisability	0.00169	-7.04	0.833	RP4-740C4.7;MORN1	intron_variant,non_coding_transcript_variant;downstream_gene_variant;intron_variant
1	2292352	meningitisencephalitis	0.00169	-8.78	0.84	RP4-740C4.7;MORN1	intron_variant,non_coding_transcript_variant;downstream_gene_variant;intron_variant
1	2292352	neurologicaldeficit	0.00169	-89.9	0.134	RP4-740C4.7;MORN1	intron_variant,non_coding_transcript_variant;downstream_gene_variant;intron_variant
1	2292352	sez_freq	0.00169	-37.2	0.833	RP4-740C4.7;MORN1	intron_variant,non_coding_transcript_variant;downstream_gene_variant;intron_variant
1	2292352	seztime	0.00169	6630	0.0102	RP4-740C4.7;MORN1	intron_variant,non_coding_transcript_variant;downstream_gene_variant;intron_variant
1	2292352	total_sez_all_types	0.00169	-1150	0.858	RP4-740C4.7;MORN1	intron_variant,non_coding_transcript_variant;downstream_gene_variant;intron_variant
1	2299627	drug_response	0.00219	3.6	0.261	RP4-740C4.7;MORN1	downstream_gene_variant;intron_variant,non_coding_transcript_variant;intron_variant;upstream_gene_variant
1	2299627	headInjury	0.00219	-0.816	0.959	RP4-740C4.7;MORN1	downstream_gene_variant;intron_variant,non_coding_transcript_variant;intron_variant;upstream_gene_variant
1	2299627	learningdisability	0.00219	-1.95	0.831	RP4-740C4.7;MORN1	downstream_gene_variant;intron_variant,non_coding_transcript_variant;intron_variant;upstream_gene_variant
1	2299627	meningitisencephalitis	0.00219	-58.5	0.0647	RP4-740C4.7;MORN1	downstream_gene_variant;intron_variant,non_coding_transcript_variant;intron_variant;upstream_gene_variant
1	2299627	neurologicaldeficit	0.00219	-46.1	0.102	RP4-740C4.7;MORN1	downstream_gene_variant;intron_variant,non_coding_transcript_variant;intron_variant;upstream_gene_variant
1	2299627	sez_freq	0.00219	-3.1	0.934	RP4-740C4.7;MORN1	downstream_gene_variant;intron_variant,non_coding_transcript_variant;intron_variant;upstream_gene_variant
1	2299627	seztime	0.00219	-94.2	0.863	RP4-740C4.7;MORN1	downstream_gene_variant;intron_variant,non_coding_transcript_variant;intron_variant;upstream_gene_variant
1	2299627	total_sez_all_types	0.00219	-65.1	0.962	RP4-740C4.7;MORN1	downstream_gene_variant;intron_variant,non_coding_transcript_variant;intron_variant;upstream_gene_variant
1	2299651	drug_response	0.00189	-26.2	0.103	RP4-740C4.7;MORN1	downstream_gene_variant;intron_variant,non_coding_transcript_variant;intron_variant;upstream_gene_variant
1	2299651	headInjury	0.00189	17.4	0.827	RP4-740C4.7;MORN1	downstream_gene_variant;intron_variant,non_coding_transcript_variant;intron_variant;upstream_gene_variant
1	2299651	learningdisability	0.00189	7.25	0.856	RP4-740C4.7;MORN1	downstream_gene_variant;intron_variant,non_coding_transcript_variant;intron_variant;upstream_gene_variant
1	2299651	meningitisencephalitis	0.00189	6.8	0.865	RP4-740C4.7;MORN1	downstream_gene_variant;intron_variant,non_coding_transcript_variant;intron_variant;upstream_gene_variant
1	2299651	neurologicaldeficit	0.00189	-28.3	0.0177	RP4-740C4.7;MORN1	downstream_gene_variant;intron_variant,non_coding_transcript_variant;intron_variant;upstream_gene_variant
1	2299651	sez_freq	0.00189	12.3	0.939	RP4-740C4.7;MORN1	downstream_gene_variant;intron_variant,non_coding_transcript_variant;intron_variant;upstream_gene_variant
1	2299651	seztime	0.00189	3940	0.0954	RP4-740C4.7;MORN1	downstream_gene_variant;intron_variant,non_coding_transcript_variant;intron_variant;upstream_gene_variant
1	2299651	total_sez_all_types	0.00189	591	0.92	RP4-740C4.7;MORN1	downstream_gene_variant;intron_variant,non_coding_transcript_variant;intron_variant;upstream_gene_variant
1	2301691	drug_response	0.000613	-1120	0.274	RP4-740C4.9;MORN1	downstream_gene_variant;intron_variant,non_coding_transcript_variant;intron_variant
1	2301691	headInjury	0.000613	-874	0.911	RP4-740C4.9;MORN1	downstream_gene_variant;intron_variant,non_coding_transcript_variant;intron_variant
1	2301691	learningdisability	0.000613	-953	0.771	RP4-740C4.9;MORN1	downstream_gene_variant;intron_variant,non_coding_transcript_variant;intron_variant
1	2301691	meningitisencephalitis	0.000613	-987	0.827	RP4-740C4.9;MORN1	downstream_gene_variant;intron_variant,non_coding_transcript_variant;intron_variant
1	2301691	neurologicaldeficit	0.000613	-917	0.814	RP4-740C4.9;MORN1	downstream_gene_variant;intron_variant,non_coding_transcript_variant;intron_variant
1	2301691	sez_freq	0.000613	-1020	0.743	RP4-740C4.9;MORN1	downstream_gene_variant;intron_variant,non_coding_transcript_variant;intron_variant
1	2301691	seztime	0.000613	146000	0.00136	RP4-740C4.9;MORN1	downstream_gene_variant;intron_variant,non_coding_transcript_variant;intron_variant
1	2301691	total_sez_all_types	0.000613	-12400	0.914	RP4-740C4.9;MORN1	downstream_gene_variant;intron_variant,non_coding_transcript_variant;intron_variant
1	2302911	drug_response	0.000583	-743	0.274	RP4-740C4.9;MORN1	downstream_gene_variant;intron_variant,non_coding_transcript_variant;intron_variant;non_coding_transcript_exon_variant
1	2302911	headInjury	0.000583	-583	0.911	RP4-740C4.9;MORN1	downstream_gene_variant;intron_variant,non_coding_transcript_variant;intron_variant;non_coding_transcript_exon_variant
1	2302911	learningdisability	0.000583	-635	0.771	RP4-740C4.9;MORN1	downstream_gene_variant;intron_variant,non_coding_transcript_variant;intron_variant;non_coding_transcript_exon_variant
1	2302911	meningitisencephalitis	0.000583	-658	0.827	RP4-740C4.9;MORN1	downstream_gene_variant;intron_variant,non_coding_transcript_variant;intron_variant;non_coding_transcript_exon_variant
1	2302911	neurologicaldeficit	0.000583	-611	0.814	RP4-740C4.9;MORN1	downstream_gene_variant;intron_variant,non_coding_transcript_variant;intron_variant;non_coding_transcript_exon_variant
1	2302911	sez_freq	0.000583	-683	0.743	RP4-740C4.9;MORN1	downstream_gene_variant;intron_variant,non_coding_transcript_variant;intron_variant;non_coding_transcript_exon_variant
1	2302911	seztime	0.000583	97400	0.00136	RP4-740C4.9;MORN1	downstream_gene_variant;intron_variant,non_coding_transcript_variant;intron_variant;non_coding_transcript_exon_variant
1	2302911	total_sez_all_types	0.000583	-8240	0.914	RP4-740C4.9;MORN1	downstream_gene_variant;intron_variant,non_coding_transcript_variant;intron_variant;non_coding_transcript_exon_variant
1	2303512	drug_response	8.64e-05	-243	0.0781	RP4-740C4.9;MORN1	intron_variant,non_coding_transcript_variant;downstream_gene_variant;intron_variant;non_coding_transcript_exon_variant
1	2303512	headInjury	8.64e-05	4.35	0.974	RP4-740C4.9;MORN1	intron_variant,non_coding_transcript_variant;downstream_gene_variant;intron_variant;non_coding_transcript_exon_variant
1	2303512	learningdisability	8.64e-05	-0.277	0.996	RP4-740C4.9;MORN1	intron_variant,non_coding_transcript_variant;downstream_gene_variant;intron_variant;non_coding_transcript_exon_variant
1	2303512	meningitisencephalitis	8.64e-05	-5.3	0.954	RP4-740C4.9;MORN1	intron_variant,non_coding_transcript_variant;downstream_gene_variant;intron_variant;non_coding_transcript_exon_variant
1	2303512	neurologicaldeficit	8.64e-05	4.89	0.939	RP4-740C4.9;MORN1	intron_variant,non_coding_transcript_variant;downstream_gene_variant;intron_variant;non_coding_transcript_exon_variant
1	2303512	sez_freq	8.64e-05	-13.2	0.975	RP4-740C4.9;MORN1	intron_variant,non_coding_transcript_variant;downstream_gene_variant;intron_variant;non_coding_transcript_exon_variant
1	2303512	seztime	8.64e-05	14700	0.0168	RP4-740C4.9;MORN1	intron_variant,non_coding_transcript_variant;downstream_gene_variant;intron_variant;non_coding_transcript_exon_variant
1	2303512	total_sez_all_types	8.64e-05	-480	0.975	RP4-740C4.9;MORN1	intron_variant,non_coding_transcript_variant;downstream_gene_variant;intron_variant;non_coding_transcript_exon_variant
1	2306695	drug_response	0.00739	0.506	0.593	RP4-740C4.9;RP4-740C4.8;MORN1	downstream_gene_variant;intron_variant,non_coding_transcript_variant;intron_variant;non_coding_transcript_exon_variant
1	2306695	headInjury	0.00739	3.7	0.57	RP4-740C4.9;RP4-740C4.8;MORN1	downstream_gene_variant;intron_variant,non_coding_transcript_variant;intron_variant;non_coding_transcript_exon_variant
1	2306695	learningdisability	0.00739	2.55	0.5	RP4-740C4.9;RP4-740C4.8;MORN1	downstream_gene_variant;intron_variant,non_coding_transcript_variant;intron_variant;non_coding_transcript_exon_variant
1	2306695	meningitisencephalitis	0.00739	-2.53	0.127	RP4-740C4.9;RP4-740C4.8;MORN1	downstream_gene_variant;intron_variant,non_coding_transcript_variant;intron_variant;non_coding_transcript_exon_variant
1	2306695	neurologicaldeficit	0.00739	-1.02	0.498	RP4-740C4.9;RP4-740C4.8;MORN1	downstream_gene_variant;intron_variant,non_coding_transcript_variant;intron_variant;non_coding_transcript_exon_variant
1	2306695	sez_freq	0.00739	3.23	0.841	RP4-740C4.9;RP4-740C4.8;MORN1	downstream_gene_variant;intron_variant,non_coding_transcript_variant;intron_variant;non_coding_transcript_exon_variant
1	2306695	seztime	0.00739	-19.5	0.934	RP4-740C4.9;RP4-740C4.8;MORN1	downstream_gene_variant;intron_variant,non_coding_transcript_variant;intron_variant;non_coding_transcript_exon_variant
1	2306695	total_sez_all_types	0.00739	31.2	0.958	RP4-740C4.9;RP4-740C4.8;MORN1	downstream_gene_variant;intron_variant,non_coding_transcript_variant;intron_variant;non_coding_transcript_exon_variant
1	2306972	drug_response	0.00998	0.784	0.302	RP4-740C4.9;RP4-740C4.8;MORN1	downstream_gene_variant;intron_variant,non_coding_transcript_variant;intron_variant;upstream_gene_variant
1	2306972	headInjury	0.00998	0.456	0.855	RP4-740C4.9;RP4-740C4.8;MORN1	downstream_gene_variant;intron_variant,non_coding_transcript_variant;intron_variant;upstream_gene_variant
1	2306972	learningdisability	0.00998	2.38	0.0826	RP4-740C4.9;RP4-740C4.8;MORN1	downstream_gene_variant;intron_variant,non_coding_transcript_variant;intron_variant;upstream_gene_variant
1	2306972	meningitisencephalitis	0.00998	-2.94	0.0732	RP4-740C4.9;RP4-740C4.8;MORN1	downstream_gene_variant;intron_variant,non_coding_transcript_variant;intron_variant;upstream_gene_variant
1	2306972	neurologicaldeficit	0.00998	0.794	0.652	RP4-740C4.9;RP4-740C4.8;MORN1	downstream_gene_variant;intron_variant,non_coding_transcript_variant;intron_variant;upstream_gene_variant
1	2306972	sez_freq	0.00998	-3.96	0.761	RP4-740C4.9;RP4-740C4.8;MORN1	downstream_gene_variant;intron_variant,non_coding_transcript_variant;intron_variant;upstream_gene_variant
1	2306972	seztime	0.00998	16.6	0.931	RP4-740C4.9;RP4-740C4.8;MORN1	downstream_gene_variant;intron_variant,non_coding_transcript_variant;intron_variant;upstream_gene_variant
1	2306972	total_sez_all_types	0.00998	-13.7	0.977	RP4-740C4.9;RP4-740C4.8;MORN1	downstream_gene_variant;intron_variant,non_coding_transcript_variant;intron_variant;upstream_gene_variant
1	2307481	drug_response	0.0112	0.718	0.29	RP4-740C4.9;RP4-740C4.8;MORN1	downstream_gene_variant;intron_variant,non_coding_transcript_variant;intron_variant;upstream_gene_variant
1	2307481	headInjury	0.0112	0.513	0.811	RP4-740C4.9;RP4-740C4.8;MORN1	downstream_gene_variant;intron_variant,non_coding_transcript_variant;intron_variant;upstream_gene_variant
1	2307481	learningdisability	0.0112	2.17	0.0724	RP4-740C4.9;RP4-740C4.8;MORN1	downstream_gene_variant;intron_variant,non_coding_transcript_variant;intron_variant;upstream_gene_variant
1	2307481	meningitisencephalitis	0.0112	-4.36	0.00389	RP4-740C4.9;RP4-740C4.8;MORN1	downstream_gene_variant;intron_variant,non_coding_transcript_variant;intron_variant;upstream_gene_variant
1	2307481	neurologicaldeficit	0.0112	0.19	0.906	RP4-740C4.9;RP4-740C4.8;MORN1	downstream_gene_variant;intron_variant,non_coding_transcript_variant;intron_variant;upstream_gene_variant
1	2307481	sez_freq	0.0112	-3.85	0.742	RP4-740C4.9;RP4-740C4.8;MORN1	downstream_gene_variant;intron_variant,non_coding_transcript_variant;intron_variant;upstream_gene_variant
1	2307481	seztime	0.0112	-1.49	0.993	RP4-740C4.9;RP4-740C4.8;MORN1	downstream_gene_variant;intron_variant,non_coding_transcript_variant;intron_variant;upstream_gene_variant
1	2307481	total_sez_all_types	0.0112	2.26	0.996	RP4-740C4.9;RP4-740C4.8;MORN1	downstream_gene_variant;intron_variant,non_coding_transcript_variant;intron_variant;upstream_gene_variant
1	2309082	drug_response	0.00903	0.984	0.184	RP4-740C4.9;RP4-740C4.8;MORN1	upstream_gene_variant;intron_variant,non_coding_transcript_variant;downstream_gene_variant;intron_variant;non_coding_transcript_exon_variant
1	2309082	headInjury	0.00903	0.187	0.935	RP4-740C4.9;RP4-740C4.8;MORN1	upstream_gene_variant;intron_variant,non_coding_transcript_variant;downstream_gene_variant;intron_variant;non_coding_transcript_exon_variant
1	2309082	learningdisability	0.00903	2.48	0.0732	RP4-740C4.9;RP4-740C4.8;MORN1	upstream_gene_variant;intron_variant,non_coding_transcript_variant;downstream_gene_variant;intron_variant;non_coding_transcript_exon_variant
1	2309082	meningitisencephalitis	0.00903	-3.87	0.00559	RP4-740C4.9;RP4-740C4.8;MORN1	upstream_gene_variant;intron_variant,non_coding_transcript_variant;downstream_gene_variant;intron_variant;non_coding_transcript_exon_variant
1	2309082	neurologicaldeficit	0.00903	-0.384	0.794	RP4-740C4.9;RP4-740C4.8;MORN1	upstream_gene_variant;intron_variant,non_coding_transcript_variant;downstream_gene_variant;intron_variant;non_coding_transcript_exon_variant
1	2309082	sez_freq	0.00903	-2.84	0.816	RP4-740C4.9;RP4-740C4.8;MORN1	upstream_gene_variant;intron_variant,non_coding_transcript_variant;downstream_gene_variant;intron_variant;non_coding_transcript_exon_variant
1	2309082	seztime	0.00903	32.8	0.855	RP4-740C4.9;RP4-740C4.8;MORN1	upstream_gene_variant;intron_variant,non_coding_transcript_variant;downstream_gene_variant;intron_variant;non_coding_transcript_exon_variant
1	2309082	total_sez_all_types	0.00903	9.38	0.983	RP4-740C4.9;RP4-740C4.8;MORN1	upstream_gene_variant;intron_variant,non_coding_transcript_variant;downstream_gene_variant;intron_variant;non_coding_transcript_exon_variant
1	2310193	drug_response	0.0132	0.496	0.368	RP4-740C4.9;RP4-740C4.8;MORN1	upstream_gene_variant;intron_variant,non_coding_transcript_variant;3_prime_UTR_variant,NMD_transcript_variant;downstream_gene_variant;intron_variant
1	2310193	headInjury	0.0132	-0.389	0.822	RP4-740C4.9;RP4-740C4.8;MORN1	upstream_gene_variant;intron_variant,non_coding_transcript_variant;3_prime_UTR_variant,NMD_transcript_variant;downstream_gene_variant;intron_variant
1	2310193	learningdisability	0.0132	1.21	0.247	RP4-740C4.9;RP4-740C4.8;MORN1	upstream_gene_variant;intron_variant,non_coding_transcript_variant;3_prime_UTR_variant,NMD_transcript_variant;downstream_gene_variant;intron_variant
1	2310193	meningitisencephalitis	0.0132	-4.61	0.000289	RP4-740C4.9;RP4-740C4.8;MORN1	upstream_gene_variant;intron_variant,non_coding_transcript_variant;3_prime_UTR_variant,NMD_transcript_variant;downstream_gene_variant;intron_variant
1	2310193	neurologicaldeficit	0.0132	1.07	0.408	RP4-740C4.9;RP4-740C4.8;MORN1	upstream_gene_variant;intron_variant,non_coding_transcript_variant;3_prime_UTR_variant,NMD_transcript_variant;downstream_gene_variant;intron_variant
1	2310193	sez_freq	0.0132	-3.68	0.702	RP4-740C4.9;RP4-740C4.8;MORN1	upstream_gene_variant;intron_variant,non_coding_transcript_variant;3_prime_UTR_variant,NMD_transcript_variant;downstream_gene_variant;intron_variant
1	2310193	seztime	0.0132	81.2	0.565	RP4-740C4.9;RP4-740C4.8;MORN1	upstream_gene_variant;intron_variant,non_coding_transcript_variant;3_prime_UTR_variant,NMD_transcript_variant;downstream_gene_variant;intron_variant
1	2310193	total_sez_all_types	0.0132	-8.49	0.981	RP4-740C4.9;RP4-740C4.8;MORN1	upstream_gene_variant;intron_variant,non_coding_transcript_variant;3_prime_UTR_variant,NMD_transcript_variant;downstream_gene_variant;intron_variant
1	2314319	drug_response	0.0104	0.598	0.376	AL513477.1;RP4-740C4.8;MORN1	upstream_gene_variant;intron_variant,non_coding_transcript_variant;downstream_gene_variant;intron_variant;intron_variant,NMD_transcript_variant
1	2314319	headInjury	0.0104	0.398	0.857	AL513477.1;RP4-740C4.8;MORN1	upstream_gene_variant;intron_variant,non_coding_transcript_variant;downstream_gene_variant;intron_variant;intron_variant,NMD_transcript_variant
1	2314319	learningdisability	0.0104	2.23	0.0734	AL513477.1;RP4-740C4.8;MORN1	upstream_gene_variant;intron_variant,non_coding_transcript_variant;downstream_gene_variant;intron_variant;intron_variant,NMD_transcript_variant
1	2314319	meningitisencephalitis	0.0104	-4.43	0.00128	AL513477.1;RP4-740C4.8;MORN1	upstream_gene_variant;intron_variant,non_coding_transcript_variant;downstream_gene_variant;intron_variant;intron_variant,NMD_transcript_variant
1	2314319	neurologicaldeficit	0.0104	-0.205	0.895	AL513477.1;RP4-740C4.8;MORN1	upstream_gene_variant;intron_variant,non_coding_transcript_variant;downstream_gene_variant;intron_variant;intron_variant,NMD_transcript_variant
1	2314319	sez_freq	0.0104	-3.32	0.777	AL513477.1;RP4-740C4.8;MORN1	upstream_gene_variant;intron_variant,non_coding_transcript_variant;downstream_gene_variant;intron_variant;intron_variant,NMD_transcript_variant
1	2314319	seztime	0.0104	57.1	0.74	AL513477.1;RP4-740C4.8;MORN1	upstream_gene_variant;intron_variant,non_coding_transcript_variant;downstream_gene_variant;intron_variant;intron_variant,NMD_transcript_variant
1	2314319	total_sez_all_types	0.0104	-5.73	0.989	AL513477.1;RP4-740C4.8;MORN1	upstream_gene_variant;intron_variant,non_coding_transcript_variant;downstream_gene_variant;intron_variant;intron_variant,NMD_transcript_variant
1	2315717	drug_response	0.0023	0.258	0.846	AL513477.1;MORN1	upstream_gene_variant;intron_variant,non_coding_transcript_variant;downstream_gene_variant;intron_variant;intron_variant,NMD_transcript_variant
1	2315717	headInjury	0.0023	21.6	0.583	AL513477.1;MORN1	upstream_gene_variant;intron_variant,non_coding_transcript_variant;downstream_gene_variant;intron_variant;intron_variant,NMD_transcript_variant
1	2315717	learningdisability	0.0023	23.9	0.512	AL513477.1;MORN1	upstream_gene_variant;intron_variant,non_coding_transcript_variant;downstream_gene_variant;intron_variant;intron_variant,NMD_transcript_variant
1	2315717	meningitisencephalitis	0.0023	-3.68	0.0389	AL513477.1;MORN1	upstream_gene_variant;intron_variant,non_coding_transcript_variant;downstream_gene_variant;intron_variant;intron_variant,NMD_transcript_variant
1	2315717	neurologicaldeficit	0.0023	-2.18	0.175	AL513477.1;MORN1	upstream_gene_variant;intron_variant,non_coding_transcript_variant;downstream_gene_variant;intron_variant;intron_variant,NMD_transcript_variant
1	2315717	sez_freq	0.0023	3.59	0.876	AL513477.1;MORN1	upstream_gene_variant;intron_variant,non_coding_transcript_variant;downstream_gene_variant;intron_variant;intron_variant,NMD_transcript_variant
1	2315717	seztime	0.0023	-173	0.608	AL513477.1;MORN1	upstream_gene_variant;intron_variant,non_coding_transcript_variant;downstream_gene_variant;intron_variant;intron_variant,NMD_transcript_variant
1	2315717	total_sez_all_types	0.0023	17.3	0.984	AL513477.1;MORN1	upstream_gene_variant;intron_variant,non_coding_transcript_variant;downstream_gene_variant;intron_variant;intron_variant,NMD_transcript_variant
1	2319428	drug_response	0.00275	0.351	0.778	RER1;AL513477.1;MORN1	upstream_gene_variant;intron_variant,non_coding_transcript_variant;downstream_gene_variant;intron_variant;non_coding_transcript_exon_variant;intron_variant,NMD_transcript_variant
1	2319428	headInjury	0.00275	22.1	0.582	RER1;AL513477.1;MORN1	upstream_gene_variant;intron_variant,non_coding_transcript_variant;downstream_gene_variant;intron_variant;non_coding_transcript_exon_variant;intron_variant,NMD_transcript_variant
1	2319428	learningdisability	0.00275	19.3	0.519	RER1;AL513477.1;MORN1	upstream_gene_variant;intron_variant,non_coding_transcript_variant;downstream_gene_variant;intron_variant;non_coding_transcript_exon_variant;intron_variant,NMD_transcript_variant
1	2319428	meningitisencephalitis	0.00275	-3.34	0.0578	RER1;AL513477.1;MORN1	upstream_gene_variant;intron_variant,non_coding_transcript_variant;downstream_gene_variant;intron_variant;non_coding_transcript_exon_variant;intron_variant,NMD_transcript_variant
1	2319428	neurologicaldeficit	0.00275	-1.96	0.207	RER1;AL513477.1;MORN1	upstream_gene_variant;intron_variant,non_coding_transcript_variant;downstream_gene_variant;intron_variant;non_coding_transcript_exon_variant;intron_variant,NMD_transcript_variant
1	2319428	sez_freq	0.00275	3.33	0.875	RER1;AL513477.1;MORN1	upstream_gene_variant;intron_variant,non_coding_transcript_variant;downstream_gene_variant;intron_variant;non_coding_transcript_exon_variant;intron_variant,NMD_transcript_variant
1	2319428	seztime	0.00275	-106	0.733	RER1;AL513477.1;MORN1	upstream_gene_variant;intron_variant,non_coding_transcript_variant;downstream_gene_variant;intron_variant;non_coding_transcript_exon_variant;intron_variant,NMD_transcript_variant
1	2319428	total_sez_all_types	0.00275	-5.17	0.995	RER1;AL513477.1;MORN1	upstream_gene_variant;intron_variant,non_coding_transcript_variant;downstream_gene_variant;intron_variant;non_coding_transcript_exon_variant;intron_variant,NMD_transcript_variant
1	2320702	drug_response	0.00301	0.125	0.909	RER1;AL513477.1;MORN1	upstream_gene_variant;intron_variant,non_coding_transcript_variant;downstream_gene_variant;intron_variant;intron_variant,NMD_transcript_variant
1	2320702	headInjury	0.00301	696	0.47	RER1;AL513477.1;MORN1	upstream_gene_variant;intron_variant,non_coding_transcript_variant;downstream_gene_variant;intron_variant;intron_variant,NMD_transcript_variant
1	2320702	learningdisability	0.00301	787	0.37	RER1;AL513477.1;MORN1	upstream_gene_variant;intron_variant,non_coding_transcript_variant;downstream_gene_variant;intron_variant;intron_variant,NMD_transcript_variant
1	2320702	meningitisencephalitis	0.00301	-3.06	0.0951	RER1;AL513477.1;MORN1	upstream_gene_variant;intron_variant,non_coding_transcript_variant;downstream_gene_variant;intron_variant;intron_variant,NMD_transcript_variant
1	2320702	neurologicaldeficit	0.00301	-1.51	0.348	RER1;AL513477.1;MORN1	upstream_gene_variant;intron_variant,non_coding_transcript_variant;downstream_gene_variant;intron_variant;intron_variant,NMD_transcript_variant
1	2320702	sez_freq	0.00301	3.99	0.834	RER1;AL513477.1;MORN1	upstream_gene_variant;intron_variant,non_coding_transcript_variant;downstream_gene_variant;intron_variant;intron_variant,NMD_transcript_variant
1	2320702	seztime	0.00301	40.5	0.885	RER1;AL513477.1;MORN1	upstream_gene_variant;intron_variant,non_coding_transcript_variant;downstream_gene_variant;intron_variant;intron_variant,NMD_transcript_variant
1	2320702	total_sez_all_types	0.00301	20.5	0.977	RER1;AL513477.1;MORN1	upstream_gene_variant;intron_variant,non_coding_transcript_variant;downstream_gene_variant;intron_variant;intron_variant,NMD_transcript_variant
1	2326009	drug_response	0.00319	-0.0573	0.965	RER1;MORN1	upstream_gene_variant;5_prime_UTR_variant;intron_variant;intron_variant,non_coding_transcript_variant
1	2326009	headInjury	0.00319	4.16	0.658	RER1;MORN1	upstream_gene_variant;5_prime_UTR_variant;intron_variant;intron_variant,non_coding_transcript_variant
1	2326009	learningdisability	0.00319	4.01	0.643	RER1;MORN1	upstream_gene_variant;5_prime_UTR_variant;intron_variant;intron_variant,non_coding_transcript_variant
1	2326009	meningitisencephalitis	0.00319	-3.54	0.0496	RER1;MORN1	upstream_gene_variant;5_prime_UTR_variant;intron_variant;intron_variant,non_coding_transcript_variant
1	2326009	neurologicaldeficit	0.00319	-2.19	0.171	RER1;MORN1	upstream_gene_variant;5_prime_UTR_variant;intron_variant;intron_variant,non_coding_transcript_variant
1	2326009	sez_freq	0.00319	3.05	0.894	RER1;MORN1	upstream_gene_variant;5_prime_UTR_variant;intron_variant;intron_variant,non_coding_transcript_variant
1	2326009	seztime	0.00319	-210	0.532	RER1;MORN1	upstream_gene_variant;5_prime_UTR_variant;intron_variant;intron_variant,non_coding_transcript_variant
1	2326009	total_sez_all_types	0.00319	5.27	0.995	RER1;MORN1	upstream_gene_variant;5_prime_UTR_variant;intron_variant;intron_variant,non_coding_transcript_variant
1	2327075	drug_response	0.00306	0.429	0.734	RER1;MORN1	upstream_gene_variant;5_prime_UTR_variant;intron_variant;intron_variant,non_coding_transcript_variant
1	2327075	headInjury	0.00306	2.84	0.681	RER1;MORN1	upstream_gene_variant;5_prime_UTR_variant;intron_variant;intron_variant,non_coding_transcript_variant
1	2327075	learningdisability	0.00306	1.55	0.734	RER1;MORN1	upstream_gene_variant;5_prime_UTR_variant;intron_variant;intron_variant,non_coding_transcript_variant
1	2327075	meningitisencephalitis	0.00306	-3.43	0.0457	RER1;MORN1	upstream_gene_variant;5_prime_UTR_variant;intron_variant;intron_variant,non_coding_transcript_variant
1	2327075	neurologicaldeficit	0.00306	-2.04	0.18	RER1;MORN1	upstream_gene_variant;5_prime_UTR_variant;intron_variant;intron_variant,non_coding_transcript_variant
1	2327075	sez_freq	0.00306	2.34	0.913	RER1;MORN1	upstream_gene_variant;5_prime_UTR_variant;intron_variant;intron_variant,non_coding_transcript_variant
1	2327075	seztime	0.00306	-245	0.435	RER1;MORN1	upstream_gene_variant;5_prime_UTR_variant;intron_variant;intron_variant,non_coding_transcript_variant
1	2327075	total_sez_all_types	0.00306	-7.57	0.992	RER1;MORN1	upstream_gene_variant;5_prime_UTR_variant;intron_variant;intron_variant,non_coding_transcript_variant
1	2327815	drug_response	0.027	-0.236	0.424	RER1;MORN1	upstream_gene_variant;downstream_gene_variant;intron_variant
1	2327815	headInjury	0.027	-1.03	0.381	RER1;MORN1	upstream_gene_variant;downstream_gene_variant;intron_variant
1	2327815	learningdisability	0.027	-0.121	0.853	RER1;MORN1	upstream_gene_variant;downstream_gene_variant;intron_variant
1	2327815	meningitisencephalitis	0.027	-3.3	0.0137	RER1;MORN1	upstream_gene_variant;downstream_gene_variant;intron_variant
1	2327815	neurologicaldeficit	0.027	0.414	0.534	RER1;MORN1	upstream_gene_variant;downstream_gene_variant;intron_variant
1	2327815	sez_freq	0.027	-4.59	0.375	RER1;MORN1	upstream_gene_variant;downstream_gene_variant;intron_variant
1	2327815	seztime	0.027	107	0.159	RER1;MORN1	upstream_gene_variant;downstream_gene_variant;intron_variant
1	2327815	total_sez_all_types	0.027	-34.6	0.855	RER1;MORN1	upstream_gene_variant;downstream_gene_variant;intron_variant
1	2333031	drug_response	0.0299	0.0745	0.781	RER1;PEX10	downstream_gene_variant;intron_variant;upstream_gene_variant
1	2333031	headInjury	0.0299	-0.524	0.584	RER1;PEX10	downstream_gene_variant;intron_variant;upstream_gene_variant
1	2333031	learningdisability	0.0299	-0.235	0.692	RER1;PEX10	downstream_gene_variant;intron_variant;upstream_gene_variant
1	2333031	meningitisencephalitis	0.0299	-3.49	0.00321	RER1;PEX10	downstream_gene_variant;intron_variant;upstream_gene_variant
1	2333031	neurologicaldeficit	0.0299	-0.00934	0.989	RER1;PEX10	downstream_gene_variant;intron_variant;upstream_gene_variant
1	2333031	sez_freq	0.0299	-3.71	0.44	RER1;PEX10	downstream_gene_variant;intron_variant;upstream_gene_variant
1	2333031	seztime	0.0299	41.3	0.557	RER1;PEX10	downstream_gene_variant;intron_variant;upstream_gene_variant
1	2333031	total_sez_all_types	0.0299	-31.6	0.857	RER1;PEX10	downstream_gene_variant;intron_variant;upstream_gene_variant
1	2335676	drug_response	0.0242	0.154	0.626	RER1;PEX10	downstream_gene_variant;3_prime_UTR_variant
1	2335676	headInjury	0.0242	-1.06	0.396	RER1;PEX10	downstream_gene_variant;3_prime_UTR_variant
1	2335676	learningdisability	0.0242	0.106	0.877	RER1;PEX10	downstream_gene_variant;3_prime_UTR_variant
1	2335676	meningitisencephalitis	0.0242	-3.7	0.00245	RER1;PEX10	downstream_gene_variant;3_prime_UTR_variant
1	2335676	neurologicaldeficit	0.0242	-0.105	0.904	RER1;PEX10	downstream_gene_variant;3_prime_UTR_variant
1	2335676	sez_freq	0.0242	-3.5	0.539	RER1;PEX10	downstream_gene_variant;3_prime_UTR_variant
1	2335676	seztime	0.0242	46.7	0.576	RER1;PEX10	downstream_gene_variant;3_prime_UTR_variant
1	2335676	total_sez_all_types	0.0242	-25	0.905	RER1;PEX10	downstream_gene_variant;3_prime_UTR_variant
1	2339074	drug_response	0.0287	0.0608	0.828	RER1;PEX10	downstream_gene_variant;intron_variant;intron_variant,NMD_transcript_variant
1	2339074	headInjury	0.0287	-1.04	0.319	RER1;PEX10	downstream_gene_variant;intron_variant;intron_variant,NMD_transcript_variant
1	2339074	learningdisability	0.0287	-0.203	0.743	RER1;PEX10	downstream_gene_variant;intron_variant;intron_variant,NMD_transcript_variant
1	2339074	meningitisencephalitis	0.0287	-3.34	0.00378	RER1;PEX10	downstream_gene_variant;intron_variant;intron_variant,NMD_transcript_variant
1	2339074	neurologicaldeficit	0.0287	0.173	0.809	RER1;PEX10	downstream_gene_variant;intron_variant;intron_variant,NMD_transcript_variant
1	2339074	sez_freq	0.0287	-3.41	0.499	RER1;PEX10	downstream_gene_variant;intron_variant;intron_variant,NMD_transcript_variant
1	2339074	seztime	0.0287	48	0.516	RER1;PEX10	downstream_gene_variant;intron_variant;intron_variant,NMD_transcript_variant
1	2339074	total_sez_all_types	0.0287	-25.5	0.89	RER1;PEX10	downstream_gene_variant;intron_variant;intron_variant,NMD_transcript_variant
1	2359981	drug_response	0.0344	0.0692	0.789	PLCH2	intron_variant
1	2359981	headInjury	0.0344	-0.101	0.906	PLCH2	intron_variant
1	2359981	learningdisability	0.0344	-0.191	0.743	PLCH2	intron_variant
1	2359981	meningitisencephalitis	0.0344	-3.25	0.0048	PLCH2	intron_variant
1	2359981	neurologicaldeficit	0.0344	0.142	0.83	PLCH2	intron_variant
1	2359981	sez_freq	0.0344	-3.68	0.429	PLCH2	intron_variant
1	2359981	seztime	0.0344	57.3	0.4	PLCH2	intron_variant
1	2359981	total_sez_all_types	0.0344	-32.5	0.849	PLCH2	intron_variant
1	2362020	drug_response	0.0355	0.0792	0.755	PLCH2	missense_variant
1	2362020	headInjury	0.0355	0.166	0.836	PLCH2	missense_variant
1	2362020	learningdisability	0.0355	0.0444	0.935	PLCH2	missense_variant
1	2362020	meningitisencephalitis	0.0355	-2.98	0.00732	PLCH2	missense_variant
1	2362020	neurologicaldeficit	0.0355	0.181	0.777	PLCH2	missense_variant
1	2362020	sez_freq	0.0355	-4.07	0.371	PLCH2	missense_variant
1	2362020	seztime	0.0355	43.9	0.511	PLCH2	missense_variant
1	2362020	total_sez_all_types	0.0355	-46.4	0.781	PLCH2	missense_variant
1	2366316	drug_response	0.0354	0.116	0.64	PLCH2	intron_variant
1	2366316	headInjury	0.0354	0.0274	0.972	PLCH2	intron_variant
1	2366316	learningdisability	0.0354	-0.206	0.71	PLCH2	intron_variant
1	2366316	meningitisencephalitis	0.0354	-3.01	0.00595	PLCH2	intron_variant
1	2366316	neurologicaldeficit	0.0354	0.174	0.781	PLCH2	intron_variant
1	2366316	sez_freq	0.0354	-3.66	0.413	PLCH2	intron_variant
1	2366316	seztime	0.0354	53.6	0.414	PLCH2	intron_variant
1	2366316	total_sez_all_types	0.0354	-35.6	0.828	PLCH2	intron_variant
1	2390588	drug_response	0.0221	0.0903	0.775	PLCH2	intron_variant
1	2390588	headInjury	0.0221	-1.07	0.425	PLCH2	intron_variant
1	2390588	learningdisability	0.0221	0.138	0.833	PLCH2	intron_variant
1	2390588	meningitisencephalitis	0.0221	-3.12	0.019	PLCH2	intron_variant
1	2390588	neurologicaldeficit	0.0221	0.132	0.871	PLCH2	intron_variant
1	2390588	sez_freq	0.0221	-3.56	0.533	PLCH2	intron_variant
1	2390588	seztime	0.0221	16.9	0.84	PLCH2	intron_variant
1	2390588	total_sez_all_types	0.0221	-35.9	0.864	PLCH2	intron_variant
1	2390840	drug_response	0.0192	0.545	0.156	PLCH2	intron_variant
1	2390840	headInjury	0.0192	-0.811	0.586	PLCH2	intron_variant
1	2390840	learningdisability	0.0192	0.352	0.635	PLCH2	intron_variant
1	2390840	meningitisencephalitis	0.0192	-2.91	0.0456	PLCH2	intron_variant
1	2390840	neurologicaldeficit	0.0192	-1.31	0.282	PLCH2	intron_variant
1	2390840	sez_freq	0.0192	-3.23	0.638	PLCH2	intron_variant
1	2390840	seztime	0.0192	-50.7	0.614	PLCH2	intron_variant
1	2390840	total_sez_all_types	0.0192	-16.5	0.948	PLCH2	intron_variant
1	2391023	drug_response	0.0143	0.607	0.177	PLCH2	intron_variant
1	2391023	headInjury	0.0143	-0.188	0.904	PLCH2	intron_variant
1	2391023	learningdisability	0.0143	-0.0588	0.949	PLCH2	intron_variant
1	2391023	meningitisencephalitis	0.0143	-2.48	0.0951	PLCH2	intron_variant
1	2391023	neurologicaldeficit	0.0143	-1.22	0.329	PLCH2	intron_variant
1	2391023	sez_freq	0.0143	-2.37	0.765	PLCH2	intron_variant
1	2391023	seztime	0.0143	-6.42	0.956	PLCH2	intron_variant
1	2391023	total_sez_all_types	0.0143	12.9	0.965	PLCH2	intron_variant
1	2404256	drug_response	0.0198	0.237	0.478	PLCH2	upstream_gene_variant;intron_variant
1	2404256	headInjury	0.0198	-0.351	0.779	PLCH2	upstream_gene_variant;intron_variant
1	2404256	learningdisability	0.0198	0.43	0.523	PLCH2	upstream_gene_variant;intron_variant
1	2404256	meningitisencephalitis	0.0198	-2.74	0.016	PLCH2	upstream_gene_variant;intron_variant
1	2404256	neurologicaldeficit	0.0198	-0.143	0.878	PLCH2	upstream_gene_variant;intron_variant
1	2404256	sez_freq	0.0198	-1.84	0.76	PLCH2	upstream_gene_variant;intron_variant
1	2404256	seztime	0.0198	-13.9	0.875	PLCH2	upstream_gene_variant;intron_variant
1	2404256	total_sez_all_types	0.0198	-8.64	0.969	PLCH2	upstream_gene_variant;intron_variant
1	2406887	drug_response	0.0345	0.00389	0.988	PLCH2	upstream_gene_variant;intron_variant
1	2406887	headInjury	0.0345	-1.66	0.0646	PLCH2	upstream_gene_variant;intron_variant
1	2406887	learningdisability	0.0345	-0.138	0.808	PLCH2	upstream_gene_variant;intron_variant
1	2406887	meningitisencephalitis	0.0345	-2.43	0.0178	PLCH2	upstream_gene_variant;intron_variant
1	2406887	neurologicaldeficit	0.0345	0.486	0.398	PLCH2	upstream_gene_variant;intron_variant
1	2406887	sez_freq	0.0345	-2.28	0.61	PLCH2	upstream_gene_variant;intron_variant
1	2406887	seztime	0.0345	88.8	0.174	PLCH2	upstream_gene_variant;intron_variant
1	2406887	total_sez_all_types	0.0345	-2.82	0.986	PLCH2	upstream_gene_variant;intron_variant
1	2408834	drug_response	0.0281	0.0776	0.772	PLCH2	upstream_gene_variant;intron_variant
1	2408834	headInjury	0.0281	-1.41	0.136	PLCH2	upstream_gene_variant;intron_variant
1	2408834	learningdisability	0.0281	-0.111	0.853	PLCH2	upstream_gene_variant;intron_variant
1	2408834	meningitisencephalitis	0.0281	-1.5	0.208	PLCH2	upstream_gene_variant;intron_variant
1	2408834	neurologicaldeficit	0.0281	0.504	0.419	PLCH2	upstream_gene_variant;intron_variant
1	2408834	sez_freq	0.0281	-2.08	0.665	PLCH2	upstream_gene_variant;intron_variant
1	2408834	seztime	0.0281	71.9	0.306	PLCH2	upstream_gene_variant;intron_variant
1	2408834	total_sez_all_types	0.0281	4.95	0.978	PLCH2	upstream_gene_variant;intron_variant
1	2409276	drug_response	0.0306	0.144	0.597	PLCH2	upstream_gene_variant;intron_variant
1	2409276	headInjury	0.0306	-1.08	0.262	PLCH2	upstream_gene_variant;intron_variant
1	2409276	learningdisability	0.0306	-0.0785	0.896	PLCH2	upstream_gene_variant;intron_variant
1	2409276	meningitisencephalitis	0.0306	-3.13	0.0016	PLCH2	upstream_gene_variant;intron_variant
1	2409276	neurologicaldeficit	0.0306	0.428	0.505	PLCH2	upstream_gene_variant;intron_variant
1	2409276	sez_freq	0.0306	-1.67	0.731	PLCH2	upstream_gene_variant;intron_variant
1	2409276	seztime	0.0306	48	0.501	PLCH2	upstream_gene_variant;intron_variant
1	2409276	total_sez_all_types	0.0306	21.9	0.902	PLCH2	upstream_gene_variant;intron_variant
1	2424122	drug_response	0.0322	0.0749	0.764	PLCH2;RP3-395M20.3;RP3-395M20.2	intron_variant,non_coding_transcript_variant;downstream_gene_variant;intron_variant
1	2424122	headInjury	0.0322	-1.06	0.242	PLCH2;RP3-395M20.3;RP3-395M20.2	intron_variant,non_coding_transcript_variant;downstream_gene_variant;intron_variant
1	2424122	learningdisability	0.0322	-0.0695	0.901	PLCH2;RP3-395M20.3;RP3-395M20.2	intron_variant,non_coding_transcript_variant;downstream_gene_variant;intron_variant
1	2424122	meningitisencephalitis	0.0322	-2.94	0.00285	PLCH2;RP3-395M20.3;RP3-395M20.2	intron_variant,non_coding_transcript_variant;downstream_gene_variant;intron_variant
1	2424122	neurologicaldeficit	0.0322	0.479	0.405	PLCH2;RP3-395M20.3;RP3-395M20.2	intron_variant,non_coding_transcript_variant;downstream_gene_variant;intron_variant
1	2424122	sez_freq	0.0322	-1.61	0.72	PLCH2;RP3-395M20.3;RP3-395M20.2	intron_variant,non_coding_transcript_variant;downstream_gene_variant;intron_variant
1	2424122	seztime	0.0322	70	0.286	PLCH2;RP3-395M20.3;RP3-395M20.2	intron_variant,non_coding_transcript_variant;downstream_gene_variant;intron_variant
1	2424122	total_sez_all_types	0.0322	20.5	0.9	PLCH2;RP3-395M20.3;RP3-395M20.2	intron_variant,non_coding_transcript_variant;downstream_gene_variant;intron_variant
1	2425992	drug_response	0.00863	0.503	0.497	PLCH2;RP3-395M20.3;RP3-395M20.2	intron_variant,non_coding_transcript_variant;intron_variant;upstream_gene_variant
1	2425992	headInjury	0.00863	0.655	0.769	PLCH2;RP3-395M20.3;RP3-395M20.2	intron_variant,non_coding_transcript_variant;intron_variant;upstream_gene_variant
1	2425992	learningdisability	0.00863	0.0652	0.968	PLCH2;RP3-395M20.3;RP3-395M20.2	intron_variant,non_coding_transcript_variant;intron_variant;upstream_gene_variant
1	2425992	meningitisencephalitis	0.00863	-3.71	0.00867	PLCH2;RP3-395M20.3;RP3-395M20.2	intron_variant,non_coding_transcript_variant;intron_variant;upstream_gene_variant
1	2425992	neurologicaldeficit	0.00863	-1.38	0.306	PLCH2;RP3-395M20.3;RP3-395M20.2	intron_variant,non_coding_transcript_variant;intron_variant;upstream_gene_variant
1	2425992	sez_freq	0.00863	11.4	0.383	PLCH2;RP3-395M20.3;RP3-395M20.2	intron_variant,non_coding_transcript_variant;intron_variant;upstream_gene_variant
1	2425992	seztime	0.00863	-184	0.337	PLCH2;RP3-395M20.3;RP3-395M20.2	intron_variant,non_coding_transcript_variant;intron_variant;upstream_gene_variant
1	2425992	total_sez_all_types	0.00863	86	0.858	PLCH2;RP3-395M20.3;RP3-395M20.2	intron_variant,non_coding_transcript_variant;intron_variant;upstream_gene_variant
1	2427712	drug_response	0.016	0.455	0.468	PLCH2;RP3-395M20.3;RP3-395M20.2	intron_variant,non_coding_transcript_variant;intron_variant;upstream_gene_variant
1	2427712	headInjury	0.016	0.305	0.877	PLCH2;RP3-395M20.3;RP3-395M20.2	intron_variant,non_coding_transcript_variant;intron_variant;upstream_gene_variant
1	2427712	learningdisability	0.016	0.127	0.927	PLCH2;RP3-395M20.3;RP3-395M20.2	intron_variant,non_coding_transcript_variant;intron_variant;upstream_gene_variant
1	2427712	meningitisencephalitis	0.016	-2.39	0.107	PLCH2;RP3-395M20.3;RP3-395M20.2	intron_variant,non_coding_transcript_variant;intron_variant;upstream_gene_variant
1	2427712	neurologicaldeficit	0.016	-0.83	0.511	PLCH2;RP3-395M20.3;RP3-395M20.2	intron_variant,non_coding_transcript_variant;intron_variant;upstream_gene_variant
1	2427712	sez_freq	0.016	4.7	0.67	PLCH2;RP3-395M20.3;RP3-395M20.2	intron_variant,non_coding_transcript_variant;intron_variant;upstream_gene_variant
1	2427712	seztime	0.016	-15.5	0.924	PLCH2;RP3-395M20.3;RP3-395M20.2	intron_variant,non_coding_transcript_variant;intron_variant;upstream_gene_variant
1	2427712	total_sez_all_types	0.016	-3.11	0.994	PLCH2;RP3-395M20.3;RP3-395M20.2	intron_variant,non_coding_transcript_variant;intron_variant;upstream_gene_variant
1	2444414	drug_response	0.0183	1.01	0.1	PANK4	downstream_gene_variant;missense_variant,NMD_transcript_variant;non_coding_transcript_exon_variant;missense_variant
1	2444414	headInjury	0.0183	-0.0994	0.959	PANK4	downstream_gene_variant;missense_variant,NMD_transcript_variant;non_coding_transcript_exon_variant;missense_variant
1	2444414	learningdisability	0.0183	0.213	0.87	PANK4	downstream_gene_variant;missense_variant,NMD_transcript_variant;non_coding_transcript_exon_variant;missense_variant
1	2444414	meningitisencephalitis	0.0183	-2.3	0.118	PANK4	downstream_gene_variant;missense_variant,NMD_transcript_variant;non_coding_transcript_exon_variant;missense_variant
1	2444414	neurologicaldeficit	0.0183	-0.744	0.556	PANK4	downstream_gene_variant;missense_variant,NMD_transcript_variant;non_coding_transcript_exon_variant;missense_variant
1	2444414	sez_freq	0.0183	2.73	0.789	PANK4	downstream_gene_variant;missense_variant,NMD_transcript_variant;non_coding_transcript_exon_variant;missense_variant
1	2444414	seztime	0.0183	-65.1	0.663	PANK4	downstream_gene_variant;missense_variant,NMD_transcript_variant;non_coding_transcript_exon_variant;missense_variant
1	2444414	total_sez_all_types	0.0183	-14.9	0.968	PANK4	downstream_gene_variant;missense_variant,NMD_transcript_variant;non_coding_transcript_exon_variant;missense_variant
1	2446880	drug_response	0.00743	0.692	0.321	PANK4	upstream_gene_variant;intron_variant,non_coding_transcript_variant;downstream_gene_variant;intron_variant;intron_variant,NMD_transcript_variant
1	2446880	headInjury	0.00743	-1.2	0.406	PANK4	upstream_gene_variant;intron_variant,non_coding_transcript_variant;downstream_gene_variant;intron_variant;intron_variant,NMD_transcript_variant
1	2446880	learningdisability	0.00743	-1.02	0.407	PANK4	upstream_gene_variant;intron_variant,non_coding_transcript_variant;downstream_gene_variant;intron_variant;intron_variant,NMD_transcript_variant
1	2446880	meningitisencephalitis	0.00743	-2.42	0.107	PANK4	upstream_gene_variant;intron_variant,non_coding_transcript_variant;downstream_gene_variant;intron_variant;intron_variant,NMD_transcript_variant
1	2446880	neurologicaldeficit	0.00743	-0.526	0.706	PANK4	upstream_gene_variant;intron_variant,non_coding_transcript_variant;downstream_gene_variant;intron_variant;intron_variant,NMD_transcript_variant
1	2446880	sez_freq	0.00743	10.5	0.376	PANK4	upstream_gene_variant;intron_variant,non_coding_transcript_variant;downstream_gene_variant;intron_variant;intron_variant,NMD_transcript_variant
1	2446880	seztime	0.00743	-279	0.108	PANK4	upstream_gene_variant;intron_variant,non_coding_transcript_variant;downstream_gene_variant;intron_variant;intron_variant,NMD_transcript_variant
1	2446880	total_sez_all_types	0.00743	136	0.754	PANK4	upstream_gene_variant;intron_variant,non_coding_transcript_variant;downstream_gene_variant;intron_variant;intron_variant,NMD_transcript_variant
1	2450394	drug_response	0.011	0.286	0.593	PANK4	downstream_gene_variant;intron_variant;upstream_gene_variant;intron_variant,NMD_transcript_variant
1	2450394	headInjury	0.011	-1.43	0.268	PANK4	downstream_gene_variant;intron_variant;upstream_gene_variant;intron_variant,NMD_transcript_variant
1	2450394	learningdisability	0.011	-1.13	0.306	PANK4	downstream_gene_variant;intron_variant;upstream_gene_variant;intron_variant,NMD_transcript_variant
1	2450394	meningitisencephalitis	0.011	-2.08	0.157	PANK4	downstream_gene_variant;intron_variant;upstream_gene_variant;intron_variant,NMD_transcript_variant
1	2450394	neurologicaldeficit	0.011	-0.0973	0.939	PANK4	downstream_gene_variant;intron_variant;upstream_gene_variant;intron_variant,NMD_transcript_variant
1	2450394	sez_freq	0.011	5.39	0.573	PANK4	downstream_gene_variant;intron_variant;upstream_gene_variant;intron_variant,NMD_transcript_variant
1	2450394	seztime	0.011	-20.8	0.882	PANK4	downstream_gene_variant;intron_variant;upstream_gene_variant;intron_variant,NMD_transcript_variant
1	2450394	total_sez_all_types	0.011	80.9	0.817	PANK4	downstream_gene_variant;intron_variant;upstream_gene_variant;intron_variant,NMD_transcript_variant
1	2466633	drug_response	0.00887	0.769	0.276	HES5	upstream_gene_variant
1	2466633	headInjury	0.00887	-1.57	0.251	HES5	upstream_gene_variant
1	2466633	learningdisability	0.00887	-1.33	0.271	HES5	upstream_gene_variant
1	2466633	meningitisencephalitis	0.00887	-2.5	0.0956	HES5	upstream_gene_variant
1	2466633	neurologicaldeficit	0.00887	-1.28	0.291	HES5	upstream_gene_variant
1	2466633	sez_freq	0.00887	10.1	0.397	HES5	upstream_gene_variant
1	2466633	seztime	0.00887	-274	0.118	HES5	upstream_gene_variant
1	2466633	total_sez_all_types	0.00887	149	0.734	HES5	upstream_gene_variant
1	2494229	drug_response	0.00853	1.26	0.11	TNFRSF14;RP3-395M20.7	upstream_gene_variant;intron_variant,non_coding_transcript_variant;downstream_gene_variant;intron_variant;non_coding_transcript_exon_variant
1	2494229	headInjury	0.00853	1.42	0.584	TNFRSF14;RP3-395M20.7	upstream_gene_variant;intron_variant,non_coding_transcript_variant;downstream_gene_variant;intron_variant;non_coding_transcript_exon_variant
1	2494229	learningdisability	0.00853	0.169	0.914	TNFRSF14;RP3-395M20.7	upstream_gene_variant;intron_variant,non_coding_transcript_variant;downstream_gene_variant;intron_variant;non_coding_transcript_exon_variant
1	2494229	meningitisencephalitis	0.00853	-2.62	0.0935	TNFRSF14;RP3-395M20.7	upstream_gene_variant;intron_variant,non_coding_transcript_variant;downstream_gene_variant;intron_variant;non_coding_transcript_exon_variant
1	2494229	neurologicaldeficit	0.00853	-1.22	0.387	TNFRSF14;RP3-395M20.7	upstream_gene_variant;intron_variant,non_coding_transcript_variant;downstream_gene_variant;intron_variant;non_coding_transcript_exon_variant
1	2494229	sez_freq	0.00853	11.2	0.376	TNFRSF14;RP3-395M20.7	upstream_gene_variant;intron_variant,non_coding_transcript_variant;downstream_gene_variant;intron_variant;non_coding_transcript_exon_variant
1	2494229	seztime	0.00853	-293	0.115	TNFRSF14;RP3-395M20.7	upstream_gene_variant;intron_variant,non_coding_transcript_variant;downstream_gene_variant;intron_variant;non_coding_transcript_exon_variant
1	2494229	total_sez_all_types	0.00853	121	0.795	TNFRSF14;RP3-395M20.7	upstream_gene_variant;intron_variant,non_coding_transcript_variant;downstream_gene_variant;intron_variant;non_coding_transcript_exon_variant
1	2502780	drug_response	0.00436	1.11	0.257	RP3-395M20.7	downstream_gene_variant
1	2502780	headInjury	0.00436	1.11	0.72	RP3-395M20.7	downstream_gene_variant
1	2502780	learningdisability	0.00436	0.0569	0.976	RP3-395M20.7	downstream_gene_variant
1	2502780	meningitisencephalitis	0.00436	-3.18	0.0546	RP3-395M20.7	downstream_gene_variant
1	2502780	neurologicaldeficit	0.00436	-1.87	0.207	RP3-395M20.7	downstream_gene_variant
1	2502780	sez_freq	0.00436	15.1	0.351	RP3-395M20.7	downstream_gene_variant
1	2502780	seztime	0.00436	-596	0.0119	RP3-395M20.7	downstream_gene_variant
1	2502780	total_sez_all_types	0.00436	202	0.733	RP3-395M20.7	downstream_gene_variant
1	2513216	drug_response	0.00456	0.478	0.575	FAM213B;RP3-395M20.9	upstream_gene_variant;intron_variant,non_coding_transcript_variant
1	2513216	headInjury	0.00456	-1.12	0.561	FAM213B;RP3-395M20.9	upstream_gene_variant;intron_variant,non_coding_transcript_variant
1	2513216	learningdisability	0.00456	0.0921	0.958	FAM213B;RP3-395M20.9	upstream_gene_variant;intron_variant,non_coding_transcript_variant
1	2513216	meningitisencephalitis	0.00456	-3.27	0.054	FAM213B;RP3-395M20.9	upstream_gene_variant;intron_variant,non_coding_transcript_variant
1	2513216	neurologicaldeficit	0.00456	-1.63	0.264	FAM213B;RP3-395M20.9	upstream_gene_variant;intron_variant,non_coding_transcript_variant
1	2513216	sez_freq	0.00456	13.8	0.356	FAM213B;RP3-395M20.9	upstream_gene_variant;intron_variant,non_coding_transcript_variant
1	2513216	seztime	0.00456	-421	0.0548	FAM213B;RP3-395M20.9	upstream_gene_variant;intron_variant,non_coding_transcript_variant
1	2513216	total_sez_all_types	0.00456	189	0.731	FAM213B;RP3-395M20.9	upstream_gene_variant;intron_variant,non_coding_transcript_variant
1	2524915	drug_response	0.0121	0.577	0.328	MMEL1;FAM213B	upstream_gene_variant;intron_variant,non_coding_transcript_variant;downstream_gene_variant;intron_variant;intron_variant,NMD_transcript_variant
1	2524915	headInjury	0.0121	-1.55	0.249	MMEL1;FAM213B	upstream_gene_variant;intron_variant,non_coding_transcript_variant;downstream_gene_variant;intron_variant;intron_variant,NMD_transcript_variant
1	2524915	learningdisability	0.0121	1.01	0.409	MMEL1;FAM213B	upstream_gene_variant;intron_variant,non_coding_transcript_variant;downstream_gene_variant;intron_variant;intron_variant,NMD_transcript_variant
1	2524915	meningitisencephalitis	0.0121	-2.61	0.0838	MMEL1;FAM213B	upstream_gene_variant;intron_variant,non_coding_transcript_variant;downstream_gene_variant;intron_variant;intron_variant,NMD_transcript_variant
1	2524915	neurologicaldeficit	0.0121	-1.05	0.396	MMEL1;FAM213B	upstream_gene_variant;intron_variant,non_coding_transcript_variant;downstream_gene_variant;intron_variant;intron_variant,NMD_transcript_variant
1	2524915	sez_freq	0.0121	4.23	0.68	MMEL1;FAM213B	upstream_gene_variant;intron_variant,non_coding_transcript_variant;downstream_gene_variant;intron_variant;intron_variant,NMD_transcript_variant
1	2524915	seztime	0.0121	-162	0.282	MMEL1;FAM213B	upstream_gene_variant;intron_variant,non_coding_transcript_variant;downstream_gene_variant;intron_variant;intron_variant,NMD_transcript_variant
1	2524915	total_sez_all_types	0.0121	74.4	0.843	MMEL1;FAM213B	upstream_gene_variant;intron_variant,non_coding_transcript_variant;downstream_gene_variant;intron_variant;intron_variant,NMD_transcript_variant
1	2526746	drug_response	0.011	0.703	0.217	MMEL1;FAM213B	downstream_gene_variant;missense_variant,NMD_transcript_variant;upstream_gene_variant;missense_variant
1	2526746	headInjury	0.011	-1.08	0.48	MMEL1;FAM213B	downstream_gene_variant;missense_variant,NMD_transcript_variant;upstream_gene_variant;missense_variant
1	2526746	learningdisability	0.011	0.727	0.511	MMEL1;FAM213B	downstream_gene_variant;missense_variant,NMD_transcript_variant;upstream_gene_variant;missense_variant
1	2526746	meningitisencephalitis	0.011	-2.71	0.0763	MMEL1;FAM213B	downstream_gene_variant;missense_variant,NMD_transcript_variant;upstream_gene_variant;missense_variant
1	2526746	neurologicaldeficit	0.011	-1.17	0.356	MMEL1;FAM213B	downstream_gene_variant;missense_variant,NMD_transcript_variant;upstream_gene_variant;missense_variant
1	2526746	sez_freq	0.011	5.93	0.55	MMEL1;FAM213B	downstream_gene_variant;missense_variant,NMD_transcript_variant;upstream_gene_variant;missense_variant
1	2526746	seztime	0.011	-171	0.239	MMEL1;FAM213B	downstream_gene_variant;missense_variant,NMD_transcript_variant;upstream_gene_variant;missense_variant
1	2526746	total_sez_all_types	0.011	84.1	0.817	MMEL1;FAM213B	downstream_gene_variant;missense_variant,NMD_transcript_variant;upstream_gene_variant;missense_variant
1	2538738	drug_response	0.0125	0.601	0.258	MMEL1	intron_variant,non_coding_transcript_variant;intron_variant;intron_variant,NMD_transcript_variant
1	2538738	headInjury	0.0125	-1.18	0.364	MMEL1	intron_variant,non_coding_transcript_variant;intron_variant;intron_variant,NMD_transcript_variant
1	2538738	learningdisability	0.0125	0.991	0.389	MMEL1	intron_variant,non_coding_transcript_variant;intron_variant;intron_variant,NMD_transcript_variant
1	2538738	meningitisencephalitis	0.0125	-2	0.153	MMEL1	intron_variant,non_coding_transcript_variant;intron_variant;intron_variant,NMD_transcript_variant
1	2538738	neurologicaldeficit	0.0125	-0.596	0.596	MMEL1	intron_variant,non_coding_transcript_variant;intron_variant;intron_variant,NMD_transcript_variant
1	2538738	sez_freq	0.0125	3.03	0.744	MMEL1	intron_variant,non_coding_transcript_variant;intron_variant;intron_variant,NMD_transcript_variant
1	2538738	seztime	0.0125	-219	0.106	MMEL1	intron_variant,non_coding_transcript_variant;intron_variant;intron_variant,NMD_transcript_variant
1	2538738	total_sez_all_types	0.0125	52.6	0.877	MMEL1	intron_variant,non_coding_transcript_variant;intron_variant;intron_variant,NMD_transcript_variant
1	2551900	drug_response	0.00634	1.36	0.128	MMEL1	intron_variant;intron_variant,NMD_transcript_variant
1	2551900	headInjury	0.00634	-5.18	0.103	MMEL1	intron_variant;intron_variant,NMD_transcript_variant
1	2551900	learningdisability	0.00634	1.32	0.403	MMEL1	intron_variant;intron_variant,NMD_transcript_variant
1	2551900	meningitisencephalitis	0.00634	-6.54	0.0849	MMEL1	intron_variant;intron_variant,NMD_transcript_variant
1	2551900	neurologicaldeficit	0.00634	-2.87	0.335	MMEL1	intron_variant;intron_variant,NMD_transcript_variant
1	2551900	sez_freq	0.00634	6.97	0.659	MMEL1	intron_variant;intron_variant,NMD_transcript_variant
1	2551900	seztime	0.00634	-138	0.55	MMEL1	intron_variant;intron_variant,NMD_transcript_variant
1	2551900	total_sez_all_types	0.00634	139	0.81	MMEL1	intron_variant;intron_variant,NMD_transcript_variant
1	2553624	drug_response	0.00794	0.969	0.159	MMEL1	intron_variant;intron_variant,NMD_transcript_variant
1	2553624	headInjury	0.00794	-1.47	0.444	MMEL1	intron_variant;intron_variant,NMD_transcript_variant
1	2553624	learningdisability	0.00794	0.928	0.479	MMEL1	intron_variant;intron_variant,NMD_transcript_variant
1	2553624	meningitisencephalitis	0.00794	-3.34	0.123	MMEL1	intron_variant;intron_variant,NMD_transcript_variant
1	2553624	neurologicaldeficit	0.00794	-1.42	0.424	MMEL1	intron_variant;intron_variant,NMD_transcript_variant
1	2553624	sez_freq	0.00794	5.06	0.675	MMEL1	intron_variant;intron_variant,NMD_transcript_variant
1	2553624	seztime	0.00794	-174	0.327	MMEL1	intron_variant;intron_variant,NMD_transcript_variant
1	2553624	total_sez_all_types	0.00794	96.2	0.828	MMEL1	intron_variant;intron_variant,NMD_transcript_variant
1	2581542	drug_response	0.0359	0.478	0.323	TTC34	intron_variant
1	2581542	headInjury	0.0359	1.49	0.223	TTC34	intron_variant
1	2581542	learningdisability	0.0359	-0.291	0.798	TTC34	intron_variant
1	2581542	meningitisencephalitis	0.0359	-4.47	0.321	TTC34	intron_variant
1	2581542	neurologicaldeficit	0.0359	1.44	0.106	TTC34	intron_variant
1	2581542	sez_freq	0.0359	17.9	0.0412	TTC34	intron_variant
1	2581542	seztime	0.0359	7.09	0.956	TTC34	intron_variant
1	2581542	total_sez_all_types	0.0359	695	0.0306	TTC34	intron_variant
1	2582340	drug_response	0.0338	0.782	0.117	TTC34	intron_variant
1	2582340	headInjury	0.0338	1.52	0.248	TTC34	intron_variant
1	2582340	learningdisability	0.0338	-0.247	0.828	TTC34	intron_variant
1	2582340	meningitisencephalitis	0.0338	-0.716	0.738	TTC34	intron_variant
1	2582340	neurologicaldeficit	0.0338	0.769	0.479	TTC34	intron_variant
1	2582340	sez_freq	0.0338	32.4	0.000348	TTC34	intron_variant
1	2582340	seztime	0.0338	-35.9	0.788	TTC34	intron_variant
1	2582340	total_sez_all_types	0.0338	1200	0.000283	TTC34	intron_variant
1	2583322	drug_response	0.0232	0.733	0.189	TTC34	intron_variant
1	2583322	headInjury	0.0232	0.449	0.819	TTC34	intron_variant
1	2583322	learningdisability	0.0232	0.0887	0.939	TTC34	intron_variant
1	2583322	meningitisencephalitis	0.0232	-2.21	0.425	TTC34	intron_variant
1	2583322	neurologicaldeficit	0.0232	0.714	0.616	TTC34	intron_variant
1	2583322	sez_freq	0.0232	19.2	0.0581	TTC34	intron_variant
1	2583322	seztime	0.0232	68.4	0.645	TTC34	intron_variant
1	2583322	total_sez_all_types	0.0232	230	0.535	TTC34	intron_variant
1	2584479	drug_response	0.0299	0.663	0.172	TTC34	intron_variant
1	2584479	headInjury	0.0299	0.427	0.797	TTC34	intron_variant
1	2584479	learningdisability	0.0299	0.0811	0.938	TTC34	intron_variant
1	2584479	meningitisencephalitis	0.0299	-1.47	0.441	TTC34	intron_variant
1	2584479	neurologicaldeficit	0.0299	0.542	0.657	TTC34	intron_variant
1	2584479	sez_freq	0.0299	22.9	0.00899	TTC34	intron_variant
1	2584479	seztime	0.0299	13.4	0.917	TTC34	intron_variant
1	2584479	total_sez_all_types	0.0299	582	0.07	TTC34	intron_variant
1	2585924	drug_response	0.0267	0.635	0.234	TTC34	intron_variant
1	2585924	headInjury	0.0267	-0.751	0.743	TTC34	intron_variant
1	2585924	learningdisability	0.0267	-0.141	0.902	TTC34	intron_variant
1	2585924	meningitisencephalitis	0.0267	-0.857	0.7	TTC34	intron_variant
1	2585924	neurologicaldeficit	0.0267	-1.7	0.404	TTC34	intron_variant
1	2585924	sez_freq	0.0267	36.9	0.000136	TTC34	intron_variant
1	2585924	seztime	0.0267	76.2	0.593	TTC34	intron_variant
1	2585924	total_sez_all_types	0.0267	982	0.00577	TTC34	intron_variant
1	2597551	drug_response	0.0212	0.784	0.163	TTC34	intron_variant
1	2597551	headInjury	0.0212	-3.79	0.266	TTC34	intron_variant
1	2597551	learningdisability	0.0212	0.238	0.837	TTC34	intron_variant
1	2597551	meningitisencephalitis	0.0212	-2	0.463	TTC34	intron_variant
1	2597551	neurologicaldeficit	0.0212	-0.704	0.703	TTC34	intron_variant
1	2597551	sez_freq	0.0212	20.5	0.0435	TTC34	intron_variant
1	2597551	seztime	0.0212	60.9	0.683	TTC34	intron_variant
1	2597551	total_sez_all_types	0.0212	135	0.718	TTC34	intron_variant
1	2613462	drug_response	0.0201	0.57	0.328	TTC34	intron_variant
1	2613462	headInjury	0.0201	-2.01	0.507	TTC34	intron_variant
1	2613462	learningdisability	0.0201	0.183	0.878	TTC34	intron_variant
1	2613462	meningitisencephalitis	0.0201	-0.91	0.682	TTC34	intron_variant
1	2613462	neurologicaldeficit	0.0201	-0.935	0.635	TTC34	intron_variant
1	2613462	sez_freq	0.0201	15.2	0.149	TTC34	intron_variant
1	2613462	seztime	0.0201	187	0.227	TTC34	intron_variant
1	2613462	total_sez_all_types	0.0201	115	0.766	TTC34	intron_variant
1	2626340	drug_response	0.0215	0.518	0.321	TTC34	intron_variant
1	2626340	headInjury	0.0215	-1.83	0.473	TTC34	intron_variant
1	2626340	learningdisability	0.0215	-0.0362	0.975	TTC34	intron_variant
1	2626340	meningitisencephalitis	0.0215	-1.37	0.53	TTC34	intron_variant
1	2626340	neurologicaldeficit	0.0215	-0.909	0.588	TTC34	intron_variant
1	2626340	sez_freq	0.0215	15.1	0.112	TTC34	intron_variant
1	2626340	seztime	0.0215	107	0.44	TTC34	intron_variant
1	2626340	total_sez_all_types	0.0215	65.2	0.851	TTC34	intron_variant
1	2684502	drug_response	0.0216	0.812	0.129	TTC34	intron_variant
1	2684502	headInjury	0.0216	-1.65	0.482	TTC34	intron_variant
1	2684502	learningdisability	0.0216	-0.239	0.837	TTC34	intron_variant
1	2684502	meningitisencephalitis	0.0216	-1.02	0.629	TTC34	intron_variant
1	2684502	neurologicaldeficit	0.0216	-0.886	0.605	TTC34	intron_variant
1	2684502	sez_freq	0.0216	16.9	0.0765	TTC34	intron_variant
1	2684502	seztime	0.0216	90.9	0.517	TTC34	intron_variant
1	2684502	total_sez_all_types	0.0216	142	0.686	TTC34	intron_variant
1	2684572	drug_response	0.0215	0.741	0.169	TTC34	intron_variant
1	2684572	headInjury	0.0215	-1.86	0.471	TTC34	intron_variant
1	2684572	learningdisability	0.0215	-0.189	0.873	TTC34	intron_variant
1	2684572	meningitisencephalitis	0.0215	-1.25	0.565	TTC34	intron_variant
1	2684572	neurologicaldeficit	0.0215	-1.29	0.475	TTC34	intron_variant
1	2684572	sez_freq	0.0215	16.3	0.0935	TTC34	intron_variant
1	2684572	seztime	0.0215	101	0.478	TTC34	intron_variant
1	2684572	total_sez_all_types	0.0215	80.1	0.822	TTC34	intron_variant
1	2688163	drug_response	0.0215	0.753	0.19	TTC34	intron_variant
1	2688163	headInjury	0.0215	-3.4	0.393	TTC34	intron_variant
1	2688163	learningdisability	0.0215	0.137	0.908	TTC34	intron_variant
1	2688163	meningitisencephalitis	0.0215	-2.13	0.472	TTC34	intron_variant
1	2688163	neurologicaldeficit	0.0215	-0.777	0.694	TTC34	intron_variant
1	2688163	sez_freq	0.0215	17.6	0.0913	TTC34	intron_variant
1	2688163	seztime	0.0215	102	0.508	TTC34	intron_variant
1	2688163	total_sez_all_types	0.0215	97	0.8	TTC34	intron_variant
1	2693695	drug_response	0.0206	0.777	0.159	TTC34	intron_variant
1	2693695	headInjury	0.0206	-2.55	0.398	TTC34	intron_variant
1	2693695	learningdisability	0.0206	-0.292	0.811	TTC34	intron_variant
1	2693695	meningitisencephalitis	0.0206	-1.94	0.459	TTC34	intron_variant
1	2693695	neurologicaldeficit	0.0206	-1.39	0.471	TTC34	intron_variant
1	2693695	sez_freq	0.0206	15.4	0.123	TTC34	intron_variant
1	2693695	seztime	0.0206	107	0.465	TTC34	intron_variant
1	2693695	total_sez_all_types	0.0206	93.2	0.799	TTC34	intron_variant
1	2699649	drug_response	0.00554	0.675	0.479	TTC34	downstream_gene_variant;intron_variant
1	2699649	headInjury	0.00554	2.17	0.594	TTC34	downstream_gene_variant;intron_variant
1	2699649	learningdisability	0.00554	2.23	0.515	TTC34	downstream_gene_variant;intron_variant
1	2699649	meningitisencephalitis	0.00554	0.0898	0.984	TTC34	downstream_gene_variant;intron_variant
1	2699649	neurologicaldeficit	0.00554	1.91	0.469	TTC34	downstream_gene_variant;intron_variant
1	2699649	sez_freq	0.00554	0.402	0.979	TTC34	downstream_gene_variant;intron_variant
1	2699649	seztime	0.00554	-551	0.0124	TTC34	downstream_gene_variant;intron_variant
1	2699649	total_sez_all_types	0.00554	171	0.757	TTC34	downstream_gene_variant;intron_variant
1	2709164	drug_response	0.0036	-3.25	0.152	TTC34	upstream_gene_variant;intron_variant
1	2709164	headInjury	0.0036	-0.158	0.974	TTC34	upstream_gene_variant;intron_variant
1	2709164	learningdisability	0.0036	0.149	0.974	TTC34	upstream_gene_variant;intron_variant
1	2709164	meningitisencephalitis	0.0036	-0.224	0.981	TTC34	upstream_gene_variant;intron_variant
1	2709164	neurologicaldeficit	0.0036	1.03	0.811	TTC34	upstream_gene_variant;intron_variant
1	2709164	sez_freq	0.0036	1.95	0.948	TTC34	upstream_gene_variant;intron_variant
1	2709164	seztime	0.0036	421	0.338	TTC34	upstream_gene_variant;intron_variant
1	2709164	total_sez_all_types	0.0036	138	0.9	TTC34	upstream_gene_variant;intron_variant
1	2713327	drug_response	0.00439	1.21	0.653	TTC34	intron_variant
1	2713327	headInjury	0.00439	788	0.511	TTC34	intron_variant
1	2713327	learningdisability	0.00439	757	0.403	TTC34	intron_variant
1	2713327	meningitisencephalitis	0.00439	666	0.68	TTC34	intron_variant
1	2713327	neurologicaldeficit	0.00439	764	0.295	TTC34	intron_variant
1	2713327	sez_freq	0.00439	3.94	0.921	TTC34	intron_variant
1	2713327	seztime	0.00439	-1880	0.00122	TTC34	intron_variant
1	2713327	total_sez_all_types	0.00439	245	0.866	TTC34	intron_variant
1	2727804	drug_response	0.00547	-0.802	0.419	RP11-740P5.3;RP11-740P5.2	downstream_gene_variant
1	2727804	headInjury	0.00547	10.6	0.415	RP11-740P5.3;RP11-740P5.2	downstream_gene_variant
1	2727804	learningdisability	0.00547	6.5	0.366	RP11-740P5.3;RP11-740P5.2	downstream_gene_variant
1	2727804	meningitisencephalitis	0.00547	-3.19	0.0676	RP11-740P5.3;RP11-740P5.2	downstream_gene_variant
1	2727804	neurologicaldeficit	0.00547	-1.34	0.383	RP11-740P5.3;RP11-740P5.2	downstream_gene_variant
1	2727804	sez_freq	0.00547	2.98	0.87	RP11-740P5.3;RP11-740P5.2	downstream_gene_variant
1	2727804	seztime	0.00547	-551	0.0384	RP11-740P5.3;RP11-740P5.2	downstream_gene_variant
1	2727804	total_sez_all_types	0.00547	116	0.862	RP11-740P5.3;RP11-740P5.2	downstream_gene_variant
1	2733587	drug_response	0.00247	-2.3	0.277	RP11-740P5.3;RP11-740P5.2	upstream_gene_variant
1	2733587	headInjury	0.00247	67.2	0.51	RP11-740P5.3;RP11-740P5.2	upstream_gene_variant
1	2733587	learningdisability	0.00247	39.4	0.469	RP11-740P5.3;RP11-740P5.2	upstream_gene_variant
1	2733587	meningitisencephalitis	0.00247	-2.04	0.695	RP11-740P5.3;RP11-740P5.2	upstream_gene_variant
1	2733587	neurologicaldeficit	0.00247	0.0988	0.984	RP11-740P5.3;RP11-740P5.2	upstream_gene_variant
1	2733587	sez_freq	0.00247	5.72	0.872	RP11-740P5.3;RP11-740P5.2	upstream_gene_variant
1	2733587	seztime	0.00247	-470	0.365	RP11-740P5.3;RP11-740P5.2	upstream_gene_variant
1	2733587	total_sez_all_types	0.00247	143	0.912	RP11-740P5.3;RP11-740P5.2	upstream_gene_variant
1	2745883	drug_response	0.00213	3.38	0.122	intergenic_variant	intergenic_variant
1	2745883	headInjury	0.00213	40.2	0.569	intergenic_variant	intergenic_variant
1	2745883	learningdisability	0.00213	20.2	0.523	intergenic_variant	intergenic_variant
1	2745883	meningitisencephalitis	0.00213	-3.77	0.0625	intergenic_variant	intergenic_variant
1	2745883	neurologicaldeficit	0.00213	-2.3	0.209	intergenic_variant	intergenic_variant
1	2745883	sez_freq	0.00213	2.71	0.912	intergenic_variant	intergenic_variant
1	2745883	seztime	0.00213	-1080	0.00255	intergenic_variant	intergenic_variant
1	2745883	total_sez_all_types	0.00213	108	0.904	intergenic_variant	intergenic_variant
1	2749716	drug_response	0.00432	-0.0568	0.958	intergenic_variant	intergenic_variant
1	2749716	headInjury	0.00432	6.51	0.571	intergenic_variant	intergenic_variant
1	2749716	learningdisability	0.00432	4.03	0.512	intergenic_variant	intergenic_variant
1	2749716	meningitisencephalitis	0.00432	-3	0.111	intergenic_variant	intergenic_variant
1	2749716	neurologicaldeficit	0.00432	-1.21	0.458	intergenic_variant	intergenic_variant
1	2749716	sez_freq	0.00432	2.58	0.892	intergenic_variant	intergenic_variant
1	2749716	seztime	0.00432	-444	0.111	intergenic_variant	intergenic_variant
1	2749716	total_sez_all_types	0.00432	61.2	0.93	intergenic_variant	intergenic_variant
1	2749921	drug_response	0.00363	0.857	0.505	intergenic_variant	intergenic_variant
1	2749921	headInjury	0.00363	27.4	0.558	intergenic_variant	intergenic_variant
1	2749921	learningdisability	0.00363	11.2	0.519	intergenic_variant	intergenic_variant
1	2749921	meningitisencephalitis	0.00363	-3.24	0.0627	intergenic_variant	intergenic_variant
1	2749921	neurologicaldeficit	0.00363	-2.04	0.202	intergenic_variant	intergenic_variant
1	2749921	sez_freq	0.00363	0.894	0.966	intergenic_variant	intergenic_variant
1	2749921	seztime	0.00363	-802	0.00912	intergenic_variant	intergenic_variant
1	2749921	total_sez_all_types	0.00363	60	0.938	intergenic_variant	intergenic_variant
1	2754512	drug_response	0.000855	11	0.175	intergenic_variant	intergenic_variant
1	2754512	headInjury	0.000855	56.8	0.726	intergenic_variant	intergenic_variant
1	2754512	learningdisability	0.000855	26	0.685	intergenic_variant	intergenic_variant
1	2754512	meningitisencephalitis	0.000855	-8.29	0.0147	intergenic_variant	intergenic_variant
1	2754512	neurologicaldeficit	0.000855	-6.33	0.0391	intergenic_variant	intergenic_variant
1	2754512	sez_freq	0.000855	-0.344	0.994	intergenic_variant	intergenic_variant
1	2754512	seztime	0.000855	-2250	0.000498	intergenic_variant	intergenic_variant
1	2754512	total_sez_all_types	0.000855	147	0.928	intergenic_variant	intergenic_variant
1	2769542	drug_response	0.001	0.453	0.92	intergenic_variant	intergenic_variant
1	2769542	headInjury	0.001	1.68	0.935	intergenic_variant	intergenic_variant
1	2769542	learningdisability	0.001	-5.21	0.706	intergenic_variant	intergenic_variant
1	2769542	meningitisencephalitis	0.001	-48.4	0.0115	intergenic_variant	intergenic_variant
1	2769542	neurologicaldeficit	0.001	-34.4	0.0293	intergenic_variant	intergenic_variant
1	2769542	sez_freq	0.001	-36.3	0.662	intergenic_variant	intergenic_variant
1	2769542	seztime	0.001	1470	0.229	intergenic_variant	intergenic_variant
1	2769542	total_sez_all_types	0.001	-87	0.977	intergenic_variant	intergenic_variant
1	2779043	drug_response	0.00173	2.23	0.319	intergenic_variant	intergenic_variant
1	2779043	headInjury	0.00173	3.9	0.743	intergenic_variant	intergenic_variant
1	2779043	learningdisability	0.00173	1.02	0.872	intergenic_variant	intergenic_variant
1	2779043	meningitisencephalitis	0.00173	-5.63	0.0174	intergenic_variant	intergenic_variant
1	2779043	neurologicaldeficit	0.00173	-4.15	0.0519	intergenic_variant	intergenic_variant
1	2779043	sez_freq	0.00173	-5.28	0.869	intergenic_variant	intergenic_variant
1	2779043	seztime	0.00173	-1360	0.00361	intergenic_variant	intergenic_variant
1	2779043	total_sez_all_types	0.00173	93.8	0.936	intergenic_variant	intergenic_variant
1	2787093	drug_response	0.00225	1.05	0.614	intergenic_variant	intergenic_variant
1	2787093	headInjury	0.00225	3.08	0.773	intergenic_variant	intergenic_variant
1	2787093	learningdisability	0.00225	-0.311	0.958	intergenic_variant	intergenic_variant
1	2787093	meningitisencephalitis	0.00225	-7.69	0.0131	intergenic_variant	intergenic_variant
1	2787093	neurologicaldeficit	0.00225	-5.83	0.035	intergenic_variant	intergenic_variant
1	2787093	sez_freq	0.00225	-5.82	0.866	intergenic_variant	intergenic_variant
1	2787093	seztime	0.00225	-760	0.132	intergenic_variant	intergenic_variant
1	2787093	total_sez_all_types	0.00225	37.9	0.976	intergenic_variant	intergenic_variant
1	2789108	drug_response	0.00131	5.24	0.264	intergenic_variant	intergenic_variant
1	2789108	headInjury	0.00131	20.4	0.71	intergenic_variant	intergenic_variant
1	2789108	learningdisability	0.00131	6.25	0.772	intergenic_variant	intergenic_variant
1	2789108	meningitisencephalitis	0.00131	-7.87	0.0134	intergenic_variant	intergenic_variant
1	2789108	neurologicaldeficit	0.00131	-5.99	0.0346	intergenic_variant	intergenic_variant
1	2789108	sez_freq	0.00131	-0.604	0.987	intergenic_variant	intergenic_variant
1	2789108	seztime	0.00131	-1670	0.00211	intergenic_variant	intergenic_variant
1	2789108	total_sez_all_types	0.00131	101	0.941	intergenic_variant	intergenic_variant
1	2792801	drug_response	0.00233	1.32	0.397	intergenic_variant	intergenic_variant
1	2792801	headInjury	0.00233	1.71	0.812	intergenic_variant	intergenic_variant
1	2792801	learningdisability	0.00233	0.19	0.96	intergenic_variant	intergenic_variant
1	2792801	meningitisencephalitis	0.00233	-4.14	0.0271	intergenic_variant	intergenic_variant
1	2792801	neurologicaldeficit	0.00233	-2.98	0.0806	intergenic_variant	intergenic_variant
1	2792801	sez_freq	0.00233	-6.72	0.789	intergenic_variant	intergenic_variant
1	2792801	seztime	0.00233	-970	0.00815	intergenic_variant	intergenic_variant
1	2792801	total_sez_all_types	0.00233	89.3	0.923	intergenic_variant	intergenic_variant
1	2797856	drug_response	0.00165	3.61	0.186	intergenic_variant	intergenic_variant
1	2797856	headInjury	0.00165	39.5	0.582	intergenic_variant	intergenic_variant
1	2797856	learningdisability	0.00165	6.74	0.692	intergenic_variant	intergenic_variant
1	2797856	meningitisencephalitis	0.00165	-4.05	0.0301	intergenic_variant	intergenic_variant
1	2797856	neurologicaldeficit	0.00165	-2.89	0.0891	intergenic_variant	intergenic_variant
1	2797856	sez_freq	0.00165	-1.82	0.947	intergenic_variant	intergenic_variant
1	2797856	seztime	0.00165	-1700	1.77e-05	intergenic_variant	intergenic_variant
1	2797856	total_sez_all_types	0.00165	137	0.89	intergenic_variant	intergenic_variant
1	2801459	drug_response	0.00152	4.18	0.269	intergenic_variant	intergenic_variant
1	2801459	headInjury	0.00152	-1.29	0.734	intergenic_variant	intergenic_variant
1	2801459	learningdisability	0.00152	11.6	0.691	intergenic_variant	intergenic_variant
1	2801459	meningitisencephalitis	0.00152	-7	0.015	intergenic_variant	intergenic_variant
1	2801459	neurologicaldeficit	0.00152	-9.72	0.0159	intergenic_variant	intergenic_variant
1	2801459	sez_freq	0.00152	-0.0888	0.998	intergenic_variant	intergenic_variant
1	2801459	seztime	0.00152	-1900	0.000425	intergenic_variant	intergenic_variant
1	2801459	total_sez_all_types	0.00152	107	0.937	intergenic_variant	intergenic_variant
1	2806107	drug_response	0.0226	0.146	0.649	intergenic_variant	intergenic_variant
1	2806107	headInjury	0.0226	-1.02	0.344	intergenic_variant	intergenic_variant
1	2806107	learningdisability	0.0226	-0.405	0.581	intergenic_variant	intergenic_variant
1	2806107	meningitisencephalitis	0.0226	-2.93	0.00199	intergenic_variant	intergenic_variant
1	2806107	neurologicaldeficit	0.0226	0.757	0.304	intergenic_variant	intergenic_variant
1	2806107	sez_freq	0.0226	0.96	0.868	intergenic_variant	intergenic_variant
1	2806107	seztime	0.0226	-16	0.85	intergenic_variant	intergenic_variant
1	2806107	total_sez_all_types	0.0226	42.2	0.842	intergenic_variant	intergenic_variant
1	2811814	drug_response	0.0212	0.227	0.495	intergenic_variant	intergenic_variant
1	2811814	headInjury	0.0212	-1.14	0.285	intergenic_variant	intergenic_variant
1	2811814	learningdisability	0.0212	-0.441	0.563	intergenic_variant	intergenic_variant
1	2811814	meningitisencephalitis	0.0212	-3.01	0.00175	intergenic_variant	intergenic_variant
1	2811814	neurologicaldeficit	0.0212	0.78	0.304	intergenic_variant	intergenic_variant
1	2811814	sez_freq	0.0212	1.11	0.854	intergenic_variant	intergenic_variant
1	2811814	seztime	0.0212	-33	0.708	intergenic_variant	intergenic_variant
1	2811814	total_sez_all_types	0.0212	45.4	0.836	intergenic_variant	intergenic_variant
1	2823459	drug_response	0.021	0.203	0.567	intergenic_variant	intergenic_variant
1	2823459	headInjury	0.021	-1.2	0.26	intergenic_variant	intergenic_variant
1	2823459	learningdisability	0.021	-0.414	0.606	intergenic_variant	intergenic_variant
1	2823459	meningitisencephalitis	0.021	-3	0.00179	intergenic_variant	intergenic_variant
1	2823459	neurologicaldeficit	0.021	0.715	0.382	intergenic_variant	intergenic_variant
1	2823459	sez_freq	0.021	-0.135	0.983	intergenic_variant	intergenic_variant
1	2823459	seztime	0.021	-16.7	0.858	intergenic_variant	intergenic_variant
1	2823459	total_sez_all_types	0.021	34.2	0.883	intergenic_variant	intergenic_variant
1	2825154	drug_response	0.023	0.207	0.52	intergenic_variant	intergenic_variant
1	2825154	headInjury	0.023	-1.03	0.326	intergenic_variant	intergenic_variant
1	2825154	learningdisability	0.023	-0.402	0.584	intergenic_variant	intergenic_variant
1	2825154	meningitisencephalitis	0.023	-2.8	0.00289	intergenic_variant	intergenic_variant
1	2825154	neurologicaldeficit	0.023	0.733	0.327	intergenic_variant	intergenic_variant
1	2825154	sez_freq	0.023	0.774	0.893	intergenic_variant	intergenic_variant
1	2825154	seztime	0.023	-24.7	0.771	intergenic_variant	intergenic_variant
1	2825154	total_sez_all_types	0.023	35.7	0.866	intergenic_variant	intergenic_variant
1	2829551	drug_response	0.0144	0.415	0.31	intergenic_variant	intergenic_variant
1	2829551	headInjury	0.0144	-1.18	0.305	intergenic_variant	intergenic_variant
1	2829551	learningdisability	0.0144	-0.382	0.659	intergenic_variant	intergenic_variant
1	2829551	meningitisencephalitis	0.0144	-2.87	0.00788	intergenic_variant	intergenic_variant
1	2829551	neurologicaldeficit	0.0144	1.17	0.227	intergenic_variant	intergenic_variant
1	2829551	sez_freq	0.0144	4.1	0.572	intergenic_variant	intergenic_variant
1	2829551	seztime	0.0144	-1.38	0.99	intergenic_variant	intergenic_variant
1	2829551	total_sez_all_types	0.0144	72.8	0.784	intergenic_variant	intergenic_variant
1	2835692	drug_response	0.0146	0.328	0.414	intergenic_variant	intergenic_variant
1	2835692	headInjury	0.0146	-1.24	0.278	intergenic_variant	intergenic_variant
1	2835692	learningdisability	0.0146	-0.481	0.591	intergenic_variant	intergenic_variant
1	2835692	meningitisencephalitis	0.0146	-2.77	0.0115	intergenic_variant	intergenic_variant
1	2835692	neurologicaldeficit	0.0146	1.18	0.195	intergenic_variant	intergenic_variant
1	2835692	sez_freq	0.0146	-0.713	0.921	intergenic_variant	intergenic_variant
1	2835692	seztime	0.0146	39.2	0.71	intergenic_variant	intergenic_variant
1	2835692	total_sez_all_types	0.0146	23.3	0.929	intergenic_variant	intergenic_variant
1	2842270	drug_response	0.0136	0.398	0.347	intergenic_variant	intergenic_variant
1	2842270	headInjury	0.0136	-1.32	0.269	intergenic_variant	intergenic_variant
1	2842270	learningdisability	0.0136	-0.428	0.648	intergenic_variant	intergenic_variant
1	2842270	meningitisencephalitis	0.0136	-2.8	0.0109	intergenic_variant	intergenic_variant
1	2842270	neurologicaldeficit	0.0136	1.15	0.219	intergenic_variant	intergenic_variant
1	2842270	sez_freq	0.0136	0.812	0.914	intergenic_variant	intergenic_variant
1	2842270	seztime	0.0136	48.7	0.659	intergenic_variant	intergenic_variant
1	2842270	total_sez_all_types	0.0136	39.7	0.886	intergenic_variant	intergenic_variant
1	2842319	drug_response	0.0132	0.475	0.275	intergenic_variant	intergenic_variant
1	2842319	headInjury	0.0132	-1.37	0.257	intergenic_variant	intergenic_variant
1	2842319	learningdisability	0.0132	-0.469	0.625	intergenic_variant	intergenic_variant
1	2842319	meningitisencephalitis	0.0132	-2.87	0.0097	intergenic_variant	intergenic_variant
1	2842319	neurologicaldeficit	0.0132	1.11	0.247	intergenic_variant	intergenic_variant
1	2842319	sez_freq	0.0132	0.773	0.92	intergenic_variant	intergenic_variant
1	2842319	seztime	0.0132	47.6	0.674	intergenic_variant	intergenic_variant
1	2842319	total_sez_all_types	0.0132	40.2	0.887	intergenic_variant	intergenic_variant
1	2847488	drug_response	0.0133	0.416	0.326	intergenic_variant	intergenic_variant
1	2847488	headInjury	0.0133	-1.48	0.198	intergenic_variant	intergenic_variant
1	2847488	learningdisability	0.0133	-0.431	0.646	intergenic_variant	intergenic_variant
1	2847488	meningitisencephalitis	0.0133	-2.76	0.0115	intergenic_variant	intergenic_variant
1	2847488	neurologicaldeficit	0.0133	1.11	0.243	intergenic_variant	intergenic_variant
1	2847488	sez_freq	0.0133	0.973	0.897	intergenic_variant	intergenic_variant
1	2847488	seztime	0.0133	50.3	0.649	intergenic_variant	intergenic_variant
1	2847488	total_sez_all_types	0.0133	42.2	0.879	intergenic_variant	intergenic_variant
1	2850181	drug_response	0.015	0.361	0.373	intergenic_variant	intergenic_variant
1	2850181	headInjury	0.015	-1.52	0.21	intergenic_variant	intergenic_variant
1	2850181	learningdisability	0.015	-0.666	0.482	intergenic_variant	intergenic_variant
1	2850181	meningitisencephalitis	0.015	-2.04	0.104	intergenic_variant	intergenic_variant
1	2850181	neurologicaldeficit	0.015	1.01	0.277	intergenic_variant	intergenic_variant
1	2850181	sez_freq	0.015	-1.48	0.838	intergenic_variant	intergenic_variant
1	2850181	seztime	0.015	70.6	0.507	intergenic_variant	intergenic_variant
1	2850181	total_sez_all_types	0.015	27.7	0.917	intergenic_variant	intergenic_variant
1	2852206	drug_response	0.0145	0.388	0.344	intergenic_variant	intergenic_variant
1	2852206	headInjury	0.0145	-1.53	0.19	intergenic_variant	intergenic_variant
1	2852206	learningdisability	0.0145	-0.593	0.53	intergenic_variant	intergenic_variant
1	2852206	meningitisencephalitis	0.0145	-1.79	0.156	intergenic_variant	intergenic_variant
1	2852206	sez_freq	0.0145	-0.461	0.95	intergenic_variant	intergenic_variant
1	2852206	seztime	0.0145	60	0.577	intergenic_variant	intergenic_variant
1	2852206	total_sez_all_types	0.0145	36	0.893	intergenic_variant	intergenic_variant
1	2852707	drug_response	0.0123	0.31	0.473	intergenic_variant	intergenic_variant
1	2852707	headInjury	0.0123	-1.5	0.22	intergenic_variant	intergenic_variant
1	2852707	learningdisability	0.0123	-0.581	0.558	intergenic_variant	intergenic_variant
1	2852707	meningitisencephalitis	0.0123	-1.86	0.152	intergenic_variant	intergenic_variant
1	2852707	neurologicaldeficit	0.0123	1.2	0.21	intergenic_variant	intergenic_variant
1	2852707	sez_freq	0.0123	0.273	0.972	intergenic_variant	intergenic_variant
1	2852707	seztime	0.0123	70.8	0.532	intergenic_variant	intergenic_variant
1	2852707	total_sez_all_types	0.0123	36.5	0.897	intergenic_variant	intergenic_variant
1	2853759	drug_response	0.0136	0.514	0.229	intergenic_variant	intergenic_variant
1	2853759	headInjury	0.0136	-1.5	0.218	intergenic_variant	intergenic_variant
1	2853759	learningdisability	0.0136	-0.621	0.522	intergenic_variant	intergenic_variant
1	2853759	meningitisencephalitis	0.0136	-1.91	0.142	intergenic_variant	intergenic_variant
1	2853759	neurologicaldeficit	0.0136	0.881	0.373	intergenic_variant	intergenic_variant
1	2853759	sez_freq	0.0136	-0.255	0.973	intergenic_variant	intergenic_variant
1	2853759	seztime	0.0136	47.6	0.669	intergenic_variant	intergenic_variant
1	2853759	total_sez_all_types	0.0136	39.8	0.886	intergenic_variant	intergenic_variant
1	2859724	drug_response	0.0128	0.428	0.334	intergenic_variant	intergenic_variant
1	2859724	headInjury	0.0128	-1.95	0.135	intergenic_variant	intergenic_variant
1	2859724	learningdisability	0.0128	-0.765	0.454	intergenic_variant	intergenic_variant
1	2859724	meningitisencephalitis	0.0128	-2.13	0.118	intergenic_variant	intergenic_variant
1	2859724	neurologicaldeficit	0.0128	0.916	0.365	intergenic_variant	intergenic_variant
1	2859724	sez_freq	0.0128	-0.896	0.91	intergenic_variant	intergenic_variant
1	2859724	seztime	0.0128	84.3	0.468	intergenic_variant	intergenic_variant
1	2859724	total_sez_all_types	0.0128	28.1	0.923	intergenic_variant	intergenic_variant
1	2860931	drug_response	0.013	0.508	0.261	intergenic_variant	intergenic_variant
1	2860931	headInjury	0.013	-2.26	0.0672	intergenic_variant	intergenic_variant
1	2860931	learningdisability	0.013	-0.688	0.507	intergenic_variant	intergenic_variant
1	2860931	meningitisencephalitis	0.013	-2.05	0.133	intergenic_variant	intergenic_variant
1	2860931	neurologicaldeficit	0.013	1.07	0.276	intergenic_variant	intergenic_variant
1	2860931	sez_freq	0.013	-0.226	0.978	intergenic_variant	intergenic_variant
1	2860931	seztime	0.013	55.1	0.64	intergenic_variant	intergenic_variant
1	2860931	total_sez_all_types	0.013	33.2	0.91	intergenic_variant	intergenic_variant
1	2869913	drug_response	0.016	0.513	0.237	intergenic_variant	intergenic_variant
1	2869913	headInjury	0.016	-1.72	0.192	intergenic_variant	intergenic_variant
1	2869913	learningdisability	0.016	-0.484	0.626	intergenic_variant	intergenic_variant
1	2869913	meningitisencephalitis	0.016	-1.93	0.146	intergenic_variant	intergenic_variant
1	2869913	neurologicaldeficit	0.016	0.927	0.368	intergenic_variant	intergenic_variant
1	2869913	sez_freq	0.016	-0.14	0.985	intergenic_variant	intergenic_variant
1	2869913	seztime	0.016	26.6	0.814	intergenic_variant	intergenic_variant
1	2869913	total_sez_all_types	0.016	45.7	0.872	intergenic_variant	intergenic_variant
1	2876525	drug_response	0.00484	0.427	0.765	intergenic_variant	intergenic_variant
1	2876525	headInjury	0.00484	1.53	0.77	intergenic_variant	intergenic_variant
1	2876525	learningdisability	0.00484	1.13	0.736	intergenic_variant	intergenic_variant
1	2876525	meningitisencephalitis	0.00484	0.0731	0.99	intergenic_variant	intergenic_variant
1	2876525	neurologicaldeficit	0.00484	1.96	0.663	intergenic_variant	intergenic_variant
1	2876525	sez_freq	0.00484	29.5	0.228	intergenic_variant	intergenic_variant
1	2876525	seztime	0.00484	-422	0.24	intergenic_variant	intergenic_variant
1	2876525	total_sez_all_types	0.00484	302	0.736	intergenic_variant	intergenic_variant
1	2878366	drug_response	0.00339	-2.6	0.292	intergenic_variant	intergenic_variant
1	2878366	headInjury	0.00339	-1.81	0.813	intergenic_variant	intergenic_variant
1	2878366	learningdisability	0.00339	9.13	0.331	intergenic_variant	intergenic_variant
1	2878366	meningitisencephalitis	0.00339	0.45	0.971	intergenic_variant	intergenic_variant
1	2878366	neurologicaldeficit	0.00339	2.16	0.807	intergenic_variant	intergenic_variant
1	2878366	sez_freq	0.00339	4.68	0.91	intergenic_variant	intergenic_variant
1	2878366	seztime	0.00339	302	0.618	intergenic_variant	intergenic_variant
1	2878366	total_sez_all_types	0.00339	33.6	0.982	intergenic_variant	intergenic_variant
1	2879460	drug_response	0.00666	-2.2	0.226	intergenic_variant	intergenic_variant
1	2879460	headInjury	0.00666	-0.977	0.862	intergenic_variant	intergenic_variant
1	2879460	learningdisability	0.00666	1.62	0.744	intergenic_variant	intergenic_variant
1	2879460	meningitisencephalitis	0.00666	-3.78	0.229	intergenic_variant	intergenic_variant
1	2879460	neurologicaldeficit	0.00666	0.768	0.859	intergenic_variant	intergenic_variant
1	2879460	sez_freq	0.00666	-6.98	0.807	intergenic_variant	intergenic_variant
1	2879460	seztime	0.00666	101	0.81	intergenic_variant	intergenic_variant
1	2879460	total_sez_all_types	0.00666	43.2	0.967	intergenic_variant	intergenic_variant
1	2879640	drug_response	0.00328	-8.59	0.205	intergenic_variant	intergenic_variant
1	2879640	headInjury	0.00328	-1.79	0.92	intergenic_variant	intergenic_variant
1	2879640	learningdisability	0.00328	20.3	0.345	intergenic_variant	intergenic_variant
1	2879640	meningitisencephalitis	0.00328	7.53	0.822	intergenic_variant	intergenic_variant
1	2879640	neurologicaldeficit	0.00328	11.1	0.532	intergenic_variant	intergenic_variant
1	2879640	sez_freq	0.00328	23.8	0.839	intergenic_variant	intergenic_variant
1	2879640	seztime	0.00328	3910	0.0231	intergenic_variant	intergenic_variant
1	2879640	total_sez_all_types	0.00328	1200	0.78	intergenic_variant	intergenic_variant
1	2883858	drug_response	0.0135	0.762	0.201	intergenic_variant	intergenic_variant
1	2883858	headInjury	0.0135	-0.646	0.764	intergenic_variant	intergenic_variant
1	2883858	learningdisability	0.0135	1.02	0.428	intergenic_variant	intergenic_variant
1	2883858	meningitisencephalitis	0.0135	-2.02	0.214	intergenic_variant	intergenic_variant
1	2883858	neurologicaldeficit	0.0135	1.47	0.355	intergenic_variant	intergenic_variant
1	2883858	sez_freq	0.0135	-3.9	0.708	intergenic_variant	intergenic_variant
1	2883858	seztime	0.0135	-45.6	0.765	intergenic_variant	intergenic_variant
1	2883858	total_sez_all_types	0.0135	26	0.946	intergenic_variant	intergenic_variant
1	2883932	drug_response	0.0164	0.234	0.626	intergenic_variant	intergenic_variant
1	2883932	headInjury	0.0164	-1.77	0.289	intergenic_variant	intergenic_variant
1	2883932	learningdisability	0.0164	0.055	0.96	intergenic_variant	intergenic_variant
1	2883932	meningitisencephalitis	0.0164	-2.11	0.162	intergenic_variant	intergenic_variant
1	2883932	neurologicaldeficit	0.0164	1.92	0.0534	intergenic_variant	intergenic_variant
1	2883932	sez_freq	0.0164	-5.03	0.562	intergenic_variant	intergenic_variant
1	2883932	seztime	0.0164	79.3	0.534	intergenic_variant	intergenic_variant
1	2883932	total_sez_all_types	0.0164	-8.42	0.979	intergenic_variant	intergenic_variant
1	2886466	drug_response	0.0137	0.594	0.305	intergenic_variant	intergenic_variant
1	2886466	headInjury	0.0137	0.101	0.96	intergenic_variant	intergenic_variant
1	2886466	learningdisability	0.0137	1.1	0.365	intergenic_variant	intergenic_variant
1	2886466	meningitisencephalitis	0.0137	-3.76	0.00752	intergenic_variant	intergenic_variant
1	2886466	neurologicaldeficit	0.0137	1.76	0.245	intergenic_variant	intergenic_variant
1	2886466	sez_freq	0.0137	-4.41	0.665	intergenic_variant	intergenic_variant
1	2886466	seztime	0.0137	72.9	0.626	intergenic_variant	intergenic_variant
1	2886466	total_sez_all_types	0.0137	17.1	0.963	intergenic_variant	intergenic_variant
1	2889577	drug_response	0.0155	0.517	0.332	intergenic_variant	intergenic_variant
1	2889577	headInjury	0.0155	0.00986	0.996	intergenic_variant	intergenic_variant
1	2889577	learningdisability	0.0155	0.996	0.391	intergenic_variant	intergenic_variant
1	2889577	meningitisencephalitis	0.0155	-3.29	0.00644	intergenic_variant	intergenic_variant
1	2889577	neurologicaldeficit	0.0155	1.07	0.448	intergenic_variant	intergenic_variant
1	2889577	sez_freq	0.0155	-3.52	0.71	intergenic_variant	intergenic_variant
1	2889577	seztime	0.0155	80.6	0.561	intergenic_variant	intergenic_variant
1	2889577	total_sez_all_types	0.0155	25.3	0.942	intergenic_variant	intergenic_variant
1	2891713	drug_response	0.0178	0.24	0.614	intergenic_variant	intergenic_variant
1	2891713	headInjury	0.0178	-0.155	0.935	intergenic_variant	intergenic_variant
1	2891713	learningdisability	0.0178	0.654	0.521	intergenic_variant	intergenic_variant
1	2891713	meningitisencephalitis	0.0178	-2.92	0.0288	intergenic_variant	intergenic_variant
1	2891713	neurologicaldeficit	0.0178	1.87	0.0608	intergenic_variant	intergenic_variant
1	2891713	sez_freq	0.0178	-5.02	0.56	intergenic_variant	intergenic_variant
1	2891713	seztime	0.0178	88.2	0.485	intergenic_variant	intergenic_variant
1	2891713	total_sez_all_types	0.0178	-14.7	0.963	intergenic_variant	intergenic_variant
1	2892959	drug_response	0.00676	3.99	0.349	intergenic_variant	intergenic_variant
1	2892959	drug_response	0.0114	0.585	0.516	intergenic_variant	intergenic_variant
1	2892959	headInjury	0.00676	2.36	0.909	intergenic_variant	intergenic_variant
1	2892959	headInjury	0.0114	-1.38	0.769	intergenic_variant	intergenic_variant
1	2892959	learningdisability	0.00676	33.3	0.39	intergenic_variant	intergenic_variant
1	2892959	learningdisability	0.0114	1.9	0.24	intergenic_variant	intergenic_variant
1	2892959	meningitisencephalitis	0.00676	2.33	0.897	intergenic_variant	intergenic_variant
1	2892959	meningitisencephalitis	0.0114	-1.11	0.778	intergenic_variant	intergenic_variant
1	2892959	neurologicaldeficit	0.00676	84.7	0.0136	intergenic_variant	intergenic_variant
1	2892959	neurologicaldeficit	0.0114	2.56	0.203	intergenic_variant	intergenic_variant
1	2892959	sez_freq	0.00676	11.7	0.787	intergenic_variant	intergenic_variant
1	2892959	sez_freq	0.0114	-8.45	0.605	intergenic_variant	intergenic_variant
1	2892959	seztime	0.00676	-1280	0.0426	intergenic_variant	intergenic_variant
1	2892959	seztime	0.0114	182	0.448	intergenic_variant	intergenic_variant
1	2892959	total_sez_all_types	0.00676	217	0.891	intergenic_variant	intergenic_variant
1	2892959	total_sez_all_types	0.0114	-2.18	0.997	intergenic_variant	intergenic_variant
1	2894632	drug_response	0.0031	0.878	0.862	intergenic_variant	intergenic_variant
1	2894632	drug_response	0.0063	0.0892	0.932	intergenic_variant	intergenic_variant
1	2894632	headInjury	0.0031	7.58	0.806	intergenic_variant	intergenic_variant
1	2894632	headInjury	0.0063	-1.49	0.811	intergenic_variant	intergenic_variant
1	2894632	learningdisability	0.0031	56.7	0.0291	intergenic_variant	intergenic_variant
1	2894632	learningdisability	0.0063	2.03	0.184	intergenic_variant	intergenic_variant
1	2894632	meningitisencephalitis	0.0031	5.97	0.86	intergenic_variant	intergenic_variant
1	2894632	meningitisencephalitis	0.0063	-2.22	0.733	intergenic_variant	intergenic_variant
1	2894632	neurologicaldeficit	0.0031	43.3	0.116	intergenic_variant	intergenic_variant
1	2894632	neurologicaldeficit	0.0063	1.88	0.355	intergenic_variant	intergenic_variant
1	2894632	sez_freq	0.0031	10.3	0.903	intergenic_variant	intergenic_variant
1	2894632	sez_freq	0.0063	-10.7	0.572	intergenic_variant	intergenic_variant
1	2894632	seztime	0.0031	724	0.559	intergenic_variant	intergenic_variant
1	2894632	seztime	0.0063	588	0.0332	intergenic_variant	intergenic_variant
1	2894632	total_sez_all_types	0.0031	560	0.857	intergenic_variant	intergenic_variant
1	2894632	total_sez_all_types	0.0063	-32	0.963	intergenic_variant	intergenic_variant
1	2896735	drug_response	0.0104	8.38	0.0678	intergenic_variant	intergenic_variant
1	2896735	drug_response	0.0128	1.16	0.242	intergenic_variant	intergenic_variant
1	2896735	headInjury	0.0104	25.7	0.507	intergenic_variant	intergenic_variant
1	2896735	headInjury	0.0128	-0.256	0.95	intergenic_variant	intergenic_variant
1	2896735	learningdisability	0.0104	-0.878	0.844	intergenic_variant	intergenic_variant
1	2896735	learningdisability	0.0128	2.18	0.207	intergenic_variant	intergenic_variant
1	2896735	meningitisencephalitis	0.0104	-0.0118	0.998	intergenic_variant	intergenic_variant
1	2896735	meningitisencephalitis	0.0128	-1.03	0.764	intergenic_variant	intergenic_variant
1	2896735	neurologicaldeficit	0.0104	38.4	0.22	intergenic_variant	intergenic_variant
1	2896735	neurologicaldeficit	0.0128	2.36	0.304	intergenic_variant	intergenic_variant
1	2896735	sez_freq	0.0104	6.89	0.841	intergenic_variant	intergenic_variant
1	2896735	sez_freq	0.0128	-7.92	0.657	intergenic_variant	intergenic_variant
1	2896735	seztime	0.0104	-764	0.128	intergenic_variant	intergenic_variant
1	2896735	seztime	0.0128	140	0.592	intergenic_variant	intergenic_variant
1	2896735	total_sez_all_types	0.0104	88.6	0.944	intergenic_variant	intergenic_variant
1	2896735	total_sez_all_types	0.0128	7.19	0.991	intergenic_variant	intergenic_variant
1	2898960	drug_response	0.00849	2.51	0.105	intergenic_variant	intergenic_variant
1	2898960	drug_response	0.011	0.851	0.282	intergenic_variant	intergenic_variant
1	2898960	headInjury	0.00849	2.3	0.723	intergenic_variant	intergenic_variant
1	2898960	headInjury	0.011	-0.0464	0.988	intergenic_variant	intergenic_variant
1	2898960	learningdisability	0.00849	5.28	0.163	intergenic_variant	intergenic_variant
1	2898960	learningdisability	0.011	1.83	0.204	intergenic_variant	intergenic_variant
1	2898960	meningitisencephalitis	0.00849	-0.552	0.883	intergenic_variant	intergenic_variant
1	2898960	meningitisencephalitis	0.011	-0.782	0.797	intergenic_variant	intergenic_variant
1	2898960	neurologicaldeficit	0.00849	1.89	0.639	intergenic_variant	intergenic_variant
1	2898960	neurologicaldeficit	0.011	2.19	0.227	intergenic_variant	intergenic_variant
1	2898960	sez_freq	0.00849	-7.98	0.718	intergenic_variant	intergenic_variant
1	2898960	sez_freq	0.011	-8.22	0.558	intergenic_variant	intergenic_variant
1	2898960	seztime	0.00849	-385	0.235	intergenic_variant	intergenic_variant
1	2898960	seztime	0.011	121	0.556	intergenic_variant	intergenic_variant
1	2898960	total_sez_all_types	0.00849	19.5	0.981	intergenic_variant	intergenic_variant
1	2898960	total_sez_all_types	0.011	-11.3	0.982	intergenic_variant	intergenic_variant
1	2902128	drug_response	0.00395	1.68	0.176	intergenic_variant	intergenic_variant
1	2902128	drug_response	0.00594	0.671	0.45	intergenic_variant	intergenic_variant
1	2902128	headInjury	0.00395	-16.3	0.606	intergenic_variant	intergenic_variant
1	2902128	headInjury	0.00594	-19	0.496	intergenic_variant	intergenic_variant
1	2902128	learningdisability	0.00395	2.24	0.197	intergenic_variant	intergenic_variant
1	2902128	learningdisability	0.00594	1.7	0.261	intergenic_variant	intergenic_variant
1	2902128	meningitisencephalitis	0.00395	-11.8	0.607	intergenic_variant	intergenic_variant
1	2902128	meningitisencephalitis	0.00594	-15.2	0.517	intergenic_variant	intergenic_variant
1	2902128	neurologicaldeficit	0.00395	0.0618	0.987	intergenic_variant	intergenic_variant
1	2902128	neurologicaldeficit	0.00594	1.9	0.311	intergenic_variant	intergenic_variant
1	2902128	sez_freq	0.00395	24.8	0.259	intergenic_variant	intergenic_variant
1	2902128	sez_freq	0.00594	12.1	0.456	intergenic_variant	intergenic_variant
1	2902128	seztime	0.00395	252	0.434	intergenic_variant	intergenic_variant
1	2902128	seztime	0.00594	337	0.157	intergenic_variant	intergenic_variant
1	2902128	total_sez_all_types	0.00395	-82.8	0.918	intergenic_variant	intergenic_variant
1	2902128	total_sez_all_types	0.00594	-31.8	0.957	intergenic_variant	intergenic_variant
1	2903380	drug_response	0.00362	1.61	0.23	intergenic_variant	intergenic_variant
1	2903380	drug_response	0.00589	0.795	0.364	intergenic_variant	intergenic_variant
1	2903380	headInjury	0.00362	-70.1	0.516	intergenic_variant	intergenic_variant
1	2903380	headInjury	0.00589	-65.5	0.456	intergenic_variant	intergenic_variant
1	2903380	learningdisability	0.00362	1.73	0.404	intergenic_variant	intergenic_variant
1	2903380	learningdisability	0.00589	1.6	0.286	intergenic_variant	intergenic_variant
1	2903380	meningitisencephalitis	0.00362	-43.8	0.571	intergenic_variant	intergenic_variant
1	2903380	meningitisencephalitis	0.00589	-59.9	0.501	intergenic_variant	intergenic_variant
1	2903380	neurologicaldeficit	0.00362	-0.328	0.941	intergenic_variant	intergenic_variant
1	2903380	neurologicaldeficit	0.00589	1.8	0.345	intergenic_variant	intergenic_variant
1	2903380	sez_freq	0.00362	27.6	0.246	intergenic_variant	intergenic_variant
1	2903380	sez_freq	0.00589	10.4	0.517	intergenic_variant	intergenic_variant
1	2903380	seztime	0.00362	459	0.188	intergenic_variant	intergenic_variant
1	2903380	seztime	0.00589	352	0.134	intergenic_variant	intergenic_variant
1	2903380	total_sez_all_types	0.00362	-80.9	0.926	intergenic_variant	intergenic_variant
1	2903380	total_sez_all_types	0.00589	-32.6	0.956	intergenic_variant	intergenic_variant
1	2904056	drug_response	0.003	1.99	0.302	intergenic_variant	intergenic_variant
1	2904056	drug_response	0.0051	0.817	0.446	intergenic_variant	intergenic_variant
1	2904056	headInjury	0.003	-13.2	0.685	intergenic_variant	intergenic_variant
1	2904056	headInjury	0.0051	-21.1	0.538	intergenic_variant	intergenic_variant
1	2904056	learningdisability	0.003	0.547	0.871	intergenic_variant	intergenic_variant
1	2904056	learningdisability	0.0051	2.18	0.186	intergenic_variant	intergenic_variant
1	2904056	meningitisencephalitis	0.003	-13.9	0.623	intergenic_variant	intergenic_variant
1	2904056	meningitisencephalitis	0.0051	-20	0.499	intergenic_variant	intergenic_variant
1	2904056	neurologicaldeficit	0.003	-0.382	0.958	intergenic_variant	intergenic_variant
1	2904056	neurologicaldeficit	0.0051	1.09	0.707	intergenic_variant	intergenic_variant
1	2904056	sez_freq	0.003	17.1	0.599	intergenic_variant	intergenic_variant
1	2904056	sez_freq	0.0051	4.01	0.838	intergenic_variant	intergenic_variant
1	2904056	seztime	0.003	430	0.368	intergenic_variant	intergenic_variant
1	2904056	seztime	0.0051	457	0.112	intergenic_variant	intergenic_variant
1	2904056	total_sez_all_types	0.003	-169	0.888	intergenic_variant	intergenic_variant
1	2904056	total_sez_all_types	0.0051	-22	0.976	intergenic_variant	intergenic_variant
1	2905605	drug_response	0.00853	0.277	0.814	intergenic_variant	intergenic_variant
1	2905605	drug_response	0.00974	0.4	0.661	intergenic_variant	intergenic_variant
1	2905605	headInjury	0.00853	-0.0878	0.985	intergenic_variant	intergenic_variant
1	2905605	headInjury	0.00974	-1.18	0.791	intergenic_variant	intergenic_variant
1	2905605	learningdisability	0.00853	1.82	0.383	intergenic_variant	intergenic_variant
1	2905605	learningdisability	0.00974	1.87	0.22	intergenic_variant	intergenic_variant
1	2905605	meningitisencephalitis	0.00853	-0.395	0.922	intergenic_variant	intergenic_variant
1	2905605	meningitisencephalitis	0.00974	-0.981	0.8	intergenic_variant	intergenic_variant
1	2905605	neurologicaldeficit	0.00853	0.223	0.951	intergenic_variant	intergenic_variant
1	2905605	neurologicaldeficit	0.00974	1.02	0.669	intergenic_variant	intergenic_variant
1	2905605	sez_freq	0.00853	26	0.23	intergenic_variant	intergenic_variant
1	2905605	sez_freq	0.00974	13.1	0.43	intergenic_variant	intergenic_variant
1	2905605	seztime	0.00853	340	0.283	intergenic_variant	intergenic_variant
1	2905605	seztime	0.00974	367	0.132	intergenic_variant	intergenic_variant
1	2905605	total_sez_all_types	0.00853	-47.2	0.952	intergenic_variant	intergenic_variant
1	2905605	total_sez_all_types	0.00974	-7.48	0.99	intergenic_variant	intergenic_variant
1	2919150	drug_response	0.00797	1.07	0.414	intergenic_variant	intergenic_variant
1	2919150	drug_response	0.00984	0.634	0.479	intergenic_variant	intergenic_variant
1	2919150	headInjury	0.00797	-2.12	0.702	intergenic_variant	intergenic_variant
1	2919150	headInjury	0.00984	-3.42	0.555	intergenic_variant	intergenic_variant
1	2919150	learningdisability	0.00797	1.49	0.494	intergenic_variant	intergenic_variant
1	2919150	learningdisability	0.00984	1.69	0.273	intergenic_variant	intergenic_variant
1	2919150	meningitisencephalitis	0.00797	-14.6	0.00263	intergenic_variant	intergenic_variant
1	2919150	meningitisencephalitis	0.00984	-19.9	0.00232	intergenic_variant	intergenic_variant
1	2919150	neurologicaldeficit	0.00797	1.02	0.779	intergenic_variant	intergenic_variant
1	2919150	neurologicaldeficit	0.00984	2.14	0.271	intergenic_variant	intergenic_variant
1	2919150	sez_freq	0.00797	6.07	0.795	intergenic_variant	intergenic_variant
1	2919150	sez_freq	0.00984	0.996	0.951	intergenic_variant	intergenic_variant
1	2919150	seztime	0.00797	593	0.0837	intergenic_variant	intergenic_variant
1	2919150	seztime	0.00984	403	0.0921	intergenic_variant	intergenic_variant
1	2919150	total_sez_all_types	0.00797	-50.3	0.953	intergenic_variant	intergenic_variant
1	2919150	total_sez_all_types	0.00984	-23.5	0.969	intergenic_variant	intergenic_variant
1	2921909	drug_response	0.00929	0.595	0.558	intergenic_variant	intergenic_variant
1	2921909	drug_response	0.0115	0.429	0.596	intergenic_variant	intergenic_variant
1	2921909	headInjury	0.00929	-0.947	0.848	intergenic_variant	intergenic_variant
1	2921909	headInjury	0.0115	-1.68	0.686	intergenic_variant	intergenic_variant
1	2921909	learningdisability	0.00929	1.95	0.302	intergenic_variant	intergenic_variant
1	2921909	learningdisability	0.0115	1.65	0.291	intergenic_variant	intergenic_variant
1	2921909	meningitisencephalitis	0.00929	-1.32	0.722	intergenic_variant	intergenic_variant
1	2921909	meningitisencephalitis	0.0115	-1.45	0.664	intergenic_variant	intergenic_variant
1	2921909	neurologicaldeficit	0.00929	0.745	0.805	intergenic_variant	intergenic_variant
1	2921909	neurologicaldeficit	0.0115	1.84	0.348	intergenic_variant	intergenic_variant
1	2921909	sez_freq	0.00929	17.7	0.334	intergenic_variant	intergenic_variant
1	2921909	sez_freq	0.0115	12.1	0.407	intergenic_variant	intergenic_variant
1	2921909	seztime	0.00929	271	0.314	intergenic_variant	intergenic_variant
1	2921909	seztime	0.0115	290	0.175	intergenic_variant	intergenic_variant
1	2921909	total_sez_all_types	0.00929	63.2	0.925	intergenic_variant	intergenic_variant
1	2921909	total_sez_all_types	0.0115	54.8	0.918	intergenic_variant	intergenic_variant
1	2924666	drug_response	0.00592	0.348	0.811	intergenic_variant	intergenic_variant
1	2924666	drug_response	0.00733	0.362	0.716	intergenic_variant	intergenic_variant
1	2924666	headInjury	0.00592	0.143	0.986	intergenic_variant	intergenic_variant
1	2924666	headInjury	0.00733	-1.82	0.767	intergenic_variant	intergenic_variant
1	2924666	learningdisability	0.00592	-6.13	0.0265	intergenic_variant	intergenic_variant
1	2924666	learningdisability	0.00733	-1.27	0.631	intergenic_variant	intergenic_variant
1	2924666	meningitisencephalitis	0.00592	-1.1	0.834	intergenic_variant	intergenic_variant
1	2924666	meningitisencephalitis	0.00733	-1.52	0.737	intergenic_variant	intergenic_variant
1	2924666	neurologicaldeficit	0.00592	1.23	0.779	intergenic_variant	intergenic_variant
1	2924666	neurologicaldeficit	0.00733	1.82	0.452	intergenic_variant	intergenic_variant
1	2924666	sez_freq	0.00592	-8.89	0.737	intergenic_variant	intergenic_variant
1	2924666	sez_freq	0.00733	-9.92	0.583	intergenic_variant	intergenic_variant
1	2924666	seztime	0.00592	741	0.0563	intergenic_variant	intergenic_variant
1	2924666	seztime	0.00733	568	0.0317	intergenic_variant	intergenic_variant
1	2924666	total_sez_all_types	0.00592	14.5	0.988	intergenic_variant	intergenic_variant
1	2924666	total_sez_all_types	0.00733	11.1	0.987	intergenic_variant	intergenic_variant
1	2926379	drug_response	0.00824	0.446	0.699	intergenic_variant	intergenic_variant
1	2926379	drug_response	0.0102	0.237	0.779	intergenic_variant	intergenic_variant
1	2926379	headInjury	0.00824	-5.21	0.634	intergenic_variant	intergenic_variant
1	2926379	headInjury	0.0102	-9.73	0.464	intergenic_variant	intergenic_variant
1	2926379	learningdisability	0.00824	2.92	0.0814	intergenic_variant	intergenic_variant
1	2926379	learningdisability	0.0102	2.11	0.135	intergenic_variant	intergenic_variant
1	2926379	meningitisencephalitis	0.00824	-10.5	0.478	intergenic_variant	intergenic_variant
1	2926379	meningitisencephalitis	0.0102	-14.2	0.363	intergenic_variant	intergenic_variant
1	2926379	neurologicaldeficit	0.00824	2.82	0.23	intergenic_variant	intergenic_variant
1	2926379	neurologicaldeficit	0.0102	3.13	0.0505	intergenic_variant	intergenic_variant
1	2926379	sez_freq	0.00824	-13.5	0.524	intergenic_variant	intergenic_variant
1	2926379	sez_freq	0.0102	-9.25	0.544	intergenic_variant	intergenic_variant
1	2926379	seztime	0.00824	320	0.303	intergenic_variant	intergenic_variant
1	2926379	seztime	0.0102	300	0.179	intergenic_variant	intergenic_variant
1	2926379	total_sez_all_types	0.00824	-121	0.877	intergenic_variant	intergenic_variant
1	2926379	total_sez_all_types	0.0102	-84.2	0.88	intergenic_variant	intergenic_variant
1	2927624	drug_response	0.00978	0.731	0.369	intergenic_variant	intergenic_variant
1	2927624	drug_response	0.0127	0.714	0.286	intergenic_variant	intergenic_variant
1	2927624	headInjury	0.00978	0.474	0.886	intergenic_variant	intergenic_variant
1	2927624	headInjury	0.0127	-0.219	0.931	intergenic_variant	intergenic_variant
1	2927624	learningdisability	0.00978	0.59	0.773	intergenic_variant	intergenic_variant
1	2927624	learningdisability	0.0127	1.61	0.28	intergenic_variant	intergenic_variant
1	2927624	meningitisencephalitis	0.00978	-0.649	0.828	intergenic_variant	intergenic_variant
1	2927624	meningitisencephalitis	0.0127	-0.948	0.715	intergenic_variant	intergenic_variant
1	2927624	neurologicaldeficit	0.00978	-0.873	0.545	intergenic_variant	intergenic_variant
1	2927624	neurologicaldeficit	0.0127	0.418	0.795	intergenic_variant	intergenic_variant
1	2927624	sez_freq	0.00978	3.55	0.799	intergenic_variant	intergenic_variant
1	2927624	sez_freq	0.0127	1.43	0.903	intergenic_variant	intergenic_variant
1	2927624	seztime	0.00978	275	0.178	intergenic_variant	intergenic_variant
1	2927624	seztime	0.0127	219	0.202	intergenic_variant	intergenic_variant
1	2927624	total_sez_all_types	0.00978	83.3	0.87	intergenic_variant	intergenic_variant
1	2927624	total_sez_all_types	0.0127	60	0.889	intergenic_variant	intergenic_variant
1	2928421	drug_response	0.016	1.22	0.109	intergenic_variant	intergenic_variant
1	2928421	drug_response	0.0199	0.76	0.208	intergenic_variant	intergenic_variant
1	2928421	headInjury	0.016	0.35	0.902	intergenic_variant	intergenic_variant
1	2928421	headInjury	0.0199	0.0463	0.984	intergenic_variant	intergenic_variant
1	2928421	learningdisability	0.016	1.62	0.21	intergenic_variant	intergenic_variant
1	2928421	learningdisability	0.0199	1.46	0.2	intergenic_variant	intergenic_variant
1	2928421	meningitisencephalitis	0.016	-3.99	0.0256	intergenic_variant	intergenic_variant
1	2928421	meningitisencephalitis	0.0199	-3.84	0.026	intergenic_variant	intergenic_variant
1	2928421	neurologicaldeficit	0.016	0.544	0.771	intergenic_variant	intergenic_variant
1	2928421	neurologicaldeficit	0.0199	1.52	0.26	intergenic_variant	intergenic_variant
1	2928421	sez_freq	0.016	-3	0.812	intergenic_variant	intergenic_variant
1	2928421	sez_freq	0.0199	-3.98	0.708	intergenic_variant	intergenic_variant
1	2928421	seztime	0.016	70.1	0.704	intergenic_variant	intergenic_variant
1	2928421	seztime	0.0199	69.9	0.654	intergenic_variant	intergenic_variant
1	2928421	total_sez_all_types	0.016	77.2	0.867	intergenic_variant	intergenic_variant
1	2928421	total_sez_all_types	0.0199	57.8	0.882	intergenic_variant	intergenic_variant
1	2937312	drug_response	0.0165	0.75	0.296	ACTRT2	upstream_gene_variant
1	2937312	drug_response	0.0212	0.531	0.368	ACTRT2	upstream_gene_variant
1	2937312	headInjury	0.0165	0.463	0.866	ACTRT2	upstream_gene_variant
1	2937312	headInjury	0.0212	0.209	0.926	ACTRT2	upstream_gene_variant
1	2937312	learningdisability	0.0165	1.48	0.221	ACTRT2	upstream_gene_variant
1	2937312	learningdisability	0.0212	1.42	0.193	ACTRT2	upstream_gene_variant
1	2937312	meningitisencephalitis	0.0165	-3.68	0.0318	ACTRT2	upstream_gene_variant
1	2937312	meningitisencephalitis	0.0212	-3.43	0.037	ACTRT2	upstream_gene_variant
1	2937312	neurologicaldeficit	0.0165	0.685	0.709	ACTRT2	upstream_gene_variant
1	2937312	neurologicaldeficit	0.0212	1.61	0.232	ACTRT2	upstream_gene_variant
1	2937312	sez_freq	0.0165	-6.51	0.598	ACTRT2	upstream_gene_variant
1	2937312	sez_freq	0.0212	-7.72	0.461	ACTRT2	upstream_gene_variant
1	2937312	seztime	0.0165	144	0.428	ACTRT2	upstream_gene_variant
1	2937312	seztime	0.0212	122	0.429	ACTRT2	upstream_gene_variant
1	2937312	total_sez_all_types	0.0165	-32	0.944	ACTRT2	upstream_gene_variant
1	2937312	total_sez_all_types	0.0212	-30.9	0.936	ACTRT2	upstream_gene_variant
[truncated: 38,002 more rows]
