# Supplementary material for: Dosage effect of Copy Number Variation in Epilepsy and ten regions of the human brain
Source: Research Square preprint supplement (doi:10.21203/rs.3.rs-6130694/v1), 2025-04-15
Supplement: Supplementary file 6 [file e96de16bd9c215f6917d9543.xlsx]

## Sheet: Top rank 1 results 
Supplementary table 1. Top results from all analyses. Table showing the top rank 1 results for SANAD, Australian cohort, Meta-analysis, UKBEC and NABEC studies.
Key for phenotype column	Pvlaue; Location; Gene; MAF
a		Traits/Phenotypes
Cohort	Association method for CNV ~ Trait	total_sez_all_types	sez_freq	seztime	drug_response	neurologicaldeficit	learningdisability	meningitisencephalitis	Joint/Joint VS
SANAD (discovery)	genotype univariate	2.89E-168; 1:1745726; GNB1; 0.0114	2.82E-195; 1:1745726; GNB1; 0.0114	0.0000333; 11:32371215; intergenic_variant; 0.0105	0.0000146; 14:19785775; RP11-496I2.7; 0.113	0.0000138; 19:15785985; CYP4F12; 0.0143	0.0000356; 6:69185960; intergenic_variant; 0.0101	0.00001; 9:95845152; SUSD3; 0.0124
N ~650	genotype joint								6.3E-202; 1:1745726; GNB1; 0.0114
Approach	genotype joint VS								2.27E-207; 1:1745726; GNB1; 0.0114
1) Moving window across the genome (split file)	log-r ratio univariate	6.48e-128; 5:42569642; GHR	4.03e-130; 5:42569642; GHR	9.57e-134; 5:42569642; GHR	1.7e-05; 8:140765991; TRAPPC9	2.19e-06; 11:125974071; RP11-673E11.2	5.97e-06; 8:14970487; SGCZ	6.29e-06; 12:131584407; GPR133
	log-r ratio joint								4.4e-193; 14:76586364; intergenic_variant
	log-r ratio jointVS								5.78e-193; 14:76586364; intergenic_variant
b		Traits/Phenotypes
Cohort	Association method for CNV ~ Trait	TIME TO FIRST SEIZURE in days	TIME TO FIRST SEIZURE CENSORING VARIABLE	Immediate 1-Year remission status	1-Year Sz free at any stage	TIME TO 12 MONTH REMISSION in days	TIME TO 12 MONTH REMISSION CENSORING VARIABLE. 1= achieved 12 month remission; 0=did not achieve 12 month remission	Joint/Joint VS
Australia (replication)	genotype univariate		0.0000129; 18:27755950; intergenic_variant; 0.0185				6.21e-06; 12:82081470; PPFIA2; 0.0448
N ~280	genotype joint							3.58e-06; 14:71666297; intergenic_variant; 0.0208
Approach	genotype joint VS							2.21e-06; 12:82081470; PPFIA2; 0.0448
1) Moving window across the genome (split file)	log-r ratio univariate		2.16e-05; 10:132173596; intergenic_variant				2.74e-07 ; 3:57508538; DNAH12;RNF7P1
	log-r ratio joint							8.05E-47; 6:91644625; intergenic_variant
	log-r ratio jointVS							8.05E-47; 6:91644625; intergenic_variant
c
Cohort		Traits/Phenotypes
SANAD+Australia Meta analysis	Association method for CNV ~ Trait	TIME TO FIRST SEIZURE in days	TIME TO FIRST SEIZURE CENSORING VARIABLE	Immediate 1-Year remission status	1-Year Sz free at any stage	TIME TO 12 MONTH REMISSION in days	TIME TO 12 MONTH REMISSION CENSORING VARIABLE. 1= achieved 12 month remission; 0=did not achieve 12 month remission	Joint/Joint VS
N ~ 900	genotype univariate	0.000301; 11:61462424; DAGLA; 0.0101	8.76e-07; 4:81576814; C4orf22; 0.0164	7.52e-06; 14:19764462; intergenic_variant; 0.0938	1.19e-05; 14:19785775; RP11-496I2.7; 0.113	3.07e-06; 1:248279895; intergenic_variant; 0.0449	1.19e-05; 14:19785775; RP11-496I2.7; 0.113
Approach	genotype joint							5.28e-09; 2:4301257; intergenic_variant; 0.0258
1) Moving window across the genome (split file)	genotype joint VS							1.77e-09; 2:4300232; intergenic_variant; 0.0258	ASIC2 ( non cnv loci)
	log-r ratio univariate	1.57e-47; 8:13434032; RP11-145O15.3	1.01e-27; 20:623082; RP5-850E9.3;SRXN1	4.31E-22; 2:155459046; intergenic_variant	5.04e-06; 8:56163136; XKR4	1.02e-46; 2:142108997; LRP1B	0.00000504; 8:56163136; XKR4
cnvHap - multi platform integration	log-r ratio joint							4.03E-95; 4:182615625; intergenic_variant
	log-r ratio jointVS							3.5e-97; 4:182615625; intergenic_variant
d
Cohort		Affymetrix exon specific gene expression values in 10 brain regions + average all of all regions
UKBEC	Association method for CNV ~ Trait	CRBL: Cerebellar cortex	FCTX: Frontal cortex	HIPP: Hippocampus	OCTX: Occipital cortex	PUTM: Putamen	THAL: Thalamus	WHMT: intralobular white matter	aveALL
genotyped on Illumina 1M Omni chip	genotype univariate	1.48e-17; 8:124259431; ZHX1; 0.0103	4.12e-14; 1:242981400; intergenic; 0.015	1.44e-15; 1:242981400; intergenic; 0.015	0.00000000000000683; 12:108864839; RP11-13G14.4; 0.0263	5.03e-12; 12:96384184; HAL; 0.0106	0.000000000097; 12:9033947; A2ML1; 0.0117	0.00000000001351; 14:47306281; MDGA2; 0.0116	2.26E-25; 1:242981400; intergenic; 0.015
N ~ 137	genotype joint	< 1E-269; 9:100158052;intergenic (TDRD7); 0.0263	< 1E-269; 9:100158052;intergenic (TDRD7); 0.0263	< 1E-269; 9:100158052;intergenic (TDRD7); 0.0263	< 1E-269; 9:100158052;intergenic (TDRD7); 0.0263	< 1E-269; 9:100158052;intergenic (TDRD7); 0.0263	< 1E-269; 9:100158052;intergenic (TDRD7); 0.0263	< 1E-269; 9:100158052;intergenic (TDRD7); 0.0263	< 1E-269; 9:100158052;intergenic (TDRD7); 0.0263
Two methods/approaches	genotype joint VS	< 1E-269; 9:99189255; intergenic; 0.0167	< 1E-269; 9:88844634; C9orf153;RP11-507D14.4; 0.0166	< 1E-269; 9:38095408; intergenic; 0.01	< 1E-269; 9:36583668; MELK; 0.0427	< 1E-269; 9:99792419; CTSV; 0.0369	< 1E-269; 9:99171631; ZNF367;RP11-172F4.2; 0.0161	< 1E-269; 9:71320040; PIP5K1B; 0.0129	< 1E-269;9:99118230; SLC35D2; 0.013
1) Moving window across the genome (split file)	log-r ratio univariate	3.41e-10; 12:122367321; WDR66	1.11e-16; 11:89966202; intergenic	1.28e-10; 7:28809566; CREB5	2.11e-09; 13:113110143; intergenic	3.02e-11; 10:114498145; VTI1A	1.24e-09; 12:114791455; TBX5	0.0000000159; 14:71138730; TTC9	1.92e-11; 12:114791455; TBX5
	log-r ratio joint	< 1E-269; 9:100823084; NANS	< 1E-269; 9:100823084; NANS	< 1E-269; 9:100823084; NANS	< 1E-269; 9:100823084; NANS	< 1E-269; 9:100823084; NANS	< 1E-269; 9:100823084; NANS	< 1E-269; 9:100823084; NANS	< 1E-269; 9:100823084; NANS
	log-r ratio jointVS	< 1E-269; 9:100612185; FOXE1	< 1E-269; 9:100550227; intergenic	< 1E-269; 9:97346437; FBP2	< 1E-269; 9:99052540; HSD17B3	< 1E-269; 9:96842557; PTPDC1	< 1E-269; 9:99953971; ANKRD18CP;RP11-498P14.3;RNU6-798P	< 1E-269; 9:100107236; RP11-23J9.4;CCDC180	< 1E-269; 9:98638256; ERCC6L2;LINC00476
e
Cohort		Traits/Phenotypes	Affymetrix exon specific gene expression values in 10 brain regions + average all of all regions
UKBEC	Association method for CNV ~ Trait	CRBL: Cerebellar cortex	FCTX: Frontal cortex	HIPP: Hippocampus	OCTX: Occipital cortex	PUTM: Putamen	THAL: Thalamus	WHMT: intralobular white matter	aveALL
genotyped on custom Immuno chip	genotype univariate	0.00000000335; 2:61116257; REL; 0.0107	9.7e-12; 19:55420924; NCR1; 0.0106	8.36e-13; 2:65405573; intergenic; 0.0122	2.46e-07; 12:123786492; SBNO1; 0.0138	1.14e-07; 6:20765004; RP3-348I23.2;CDKAL1; 0.011	5.9e-12; 19:10450934; ICAM3; 0.0131	7.51e-13; 2:199497835; AC019330.1; 0.0119	4.66e-09; 8:57031721; SNORA3; 0.0105
N ~ 137	genotype joint	< 1E-269; 9:100782695; ANP32B; 0.0189	< 1E-269; 9:100782695; ANP32B; 0.0189	< 1E-269; 9:100782695; ANP32B; 0.0189	< 1E-269; 9:100782695; ANP32B; 0.0189	< 1E-269; 9:100782695; ANP32B; 0.0189	< 1E-269; 9:100782695; ANP32B; 0.0189	< 1E-269; 9:100782695; ANP32B; 0.0189	< 1E-269; 9:100782695; ANP32B; 0.0189
Approach	genotype joint VS	< 1E-269; 9:5062932; JAK2; 0.0223	< 1E-269; 9:139231060; GPSM1; 0.0299	< 1E-269; 9:139222623; GPSM1;DKFZP434A062; 0.0309	< 1E-269; 9:139257017; GPSM1;CARD9;DNLZ; 0.0319	< 1E-269; 9:34146645; intergenic; 0.0132	< 1E-269; 9:34670988R; RP11-195F19.5; 0.011	< 1E-269; 9:100740124; intergenic; 0.0206	< 1E-269; 9:124129024; STOM; 0.0121
1) Moving window across the genome (split file)	log-r ratio univariate	9.9e-11; 1:77484600; ST6GALNAC5	8.29e-08; 5:544640; intergenic	1.84e-09; 11:114562546; NXPE2	1.01e-08; 5:96319607; LNPEP	9.07e-11; 22:45555829; CTA-217C2.2;NUP50;CTA-217C2.1	2.91e-09; 16:75296761; BCAR1	0.0000000000022; 10:59954109; IPMK	0.0000000606; 12:68487317; IFNG-AS1
	log-r ratio joint	< 1E-269; 9:100763890; ANP32B	< 1E-269; 9:100763890; ANP32B	< 1E-269; 9:100763890; ANP32B	< 1E-269; 9:100763890; ANP32B	< 1E-269; 9:100763890; ANP32B	< 1E-269; 9:100763890; ANP32B	< 1E-269; 9:100763890; ANP32B	< 1E-269; 9:100763890; ANP32B
	log-r ratio jointVS	< 1E-269; 9:5222319; intergenic	< 1E-269; 9:5166075; INSL6	< 1E-269; 9:96026243; WNK2	< 1E-269; 9:37209396; ZCCHC7;RP11-220I1.4	< 1E-269; 9:89031543; RP11-359J6.1	< 1E-269; 9:96404285; PHF2	< 1E-269; 9:80232270; GNA14	< 1E-269; 9:5182781; INSL6
f
Cohort		Traits/Phenotypes	Gene level expression from two brain regions
North American Brain Expression Consortium	Association method for CNV ~ Trait	CRBL: Cerebellar cortex	FCTX: Frontal cortex
N ~ 350	genotype univariate	2.96E-833; 3:100424728; TFG; 0.0101	4.59e-71; 3:100424728; TFG; 0.0101
Approach	genotype joint	1.12e-84; 3:100424728; TFG; 0.0101	5.79e-66; 3:100357671; GPR128; 0.0111
1) Moving window across the genome (split file)	genotype joint VS	1.83e-92; 3:100424728; TFG; 0.0101	1.39e-73; 3:100424728; TFG; 0.0101
	log-r ratio univariate	4.74e-58; 6:21223140; CDKAL1	8.82e-58; 6:32480513; HLA-DRB5
	log-r ratio joint	4.13e-164; 22:17442154; GAB4	1.62e-102; 1:120506945; NOTCH2
	log-r ratio jointVS	7.29e-254; 1:120628915; intergenic	1.03e-192; 22:16121377; NBEAP3;LA16c-60H5.7
