# Supplementary material for: Dosage effect of Copy Number Variation in Epilepsy and ten regions of the human brain
Source: Research Square preprint supplement (doi:10.21203/rs.3.rs-6130694/v1), 2025-04-15
Supplement: Supplementary file 7 [file f91955d9c99099a31b7d991c.xlsx]

## Sheet: Sheet1
Supplementary table 6. LRR results for SCN1B. Results for association of Log R Ratio with gene expression in different regions of the brain from the UKBEC dataset. Only three brain regions had p values < 1e-03 namely Putamen, white matter and occipital cortex.
Brain region	chr_start	snpid	Exon probe id	beta	pv	nobs
Putamen	19_35530138	19_35530138	t3830061	-0.792	0.00243	126
White matter	19_35534936	19_35534936	t3830070	0.823	0.00331	128
Occipital cortex	19_35530138	19_35530138	t3830052	0.57	0.00437	127
White matter	19_35530138	19_35530138	t3830069	0.833	0.00449	128
Putamen	19_35534508	19_35534508	t3830045	-0.605	0.00667	126
White matter	19_35530138	19_35530138	t3830052	0.578	0.00835	128
White matter	19_35534508	19_35534508	t3830043	-0.263	0.0111	128
Occipital cortex	19_35530781	19_35530781	t3830045	0.506	0.0113	127
White matter	19_35530138	19_35530138	t3830055	0.755	0.012	128
White matter	19_35534508	19_35534508	t3830062	-0.553	0.0149	128
Occipital cortex	19_35530781	19_35530781	t3830072	0.623	0.0174	127
White matter	19_35534936	19_35534936	t3830071	0.699	0.0266	128
Putamen	19_35534508	19_35534508	t3830043	-0.262	0.034	126
White matter	19_35534508	19_35534508	t3830059	0.617	0.0385	128
Putamen	19_35530781	19_35530781	t3830071	0.516	0.0392	126
Putamen	19_35529792	19_35529792	t3830042	-0.392	0.0394	126
Occipital cortex	19_35534936	19_35534936	t3830059	0.742	0.0398	127
Occipital cortex	19_35534508	19_35534508	t3830055	-0.544	0.0444	127
Occipital cortex	19_35530781	19_35530781	t3830068	0.241	0.0462	127
Putamen	19_35530138	19_35530138	t3830071	0.638	0.0473	126
White matter	19_35529792	19_35529792	t3830044	-0.618	0.05	128
Occipital cortex	19_35530781	19_35530781	t3830042	0.242	0.0502	127
Putamen	19_35534508	19_35534508	t3830044	0.473	0.0528	126
Occipital cortex	19_35530138	19_35530138	t3830069	-0.605	0.0528	127
Putamen	19_35534936	19_35534936	t3830060	0.869	0.0604	126
White matter	19_35534936	19_35534936	t3830059	0.748	0.0643	128
Occipital cortex	19_35529792	19_35529792	t3830044	0.508	0.069	127
Occipital cortex	19_35530781	19_35530781	t3830064	0.496	0.07	127
Putamen	19_35534936	19_35534936	t3830042	0.374	0.0708	126
White matter	19_35534508	19_35534508	t3830057	-0.518	0.0722	128
White matter	19_35529792	19_35529792	t3830072	0.717	0.0723	128
White matter	19_35530138	19_35530138	t3830042	0.312	0.0726	128
White matter	19_35534508	19_35534508	t3830052	-0.365	0.0747	128
Putamen	19_35529792	19_35529792	t3830052	-0.382	0.0767	126
Occipital cortex	19_35530138	19_35530138	t3830044	0.423	0.0769	127
Occipital cortex	19_35529792	19_35529792	t3830055	0.597	0.0782	127
Putamen	19_35530781	19_35530781	t3830057	0.342	0.0796	126
Occipital cortex	19_35534508	19_35534508	t3830062	-0.485	0.0851	127
Occipital cortex	19_35530138	19_35530138	t3830053	0.366	0.0983	127
Occipital cortex	19_35530781	19_35530781	t3830043	0.135	0.1	127
White matter	19_35534508	19_35534508	t3830055	-0.46	0.101	128
Putamen	19_35534936	19_35534936	t3830044	0.528	0.109	126
White matter	19_35529792	19_35529792	t3830069	0.56	0.111	128
Occipital cortex	19_35530138	19_35530138	t3830064	0.545	0.12	127
White matter	19_35530138	19_35530138	t3830057	0.482	0.122	128
Occipital cortex	19_35534508	19_35534508	t3830057	-0.383	0.124	127
Putamen	19_35529792	19_35529792	t3830071	0.569	0.126	126
White matter	19_35530781	19_35530781	t3830061	-0.314	0.126	128
White matter	19_35530138	19_35530138	t3830045	0.359	0.128	128
Putamen	19_35529792	19_35529792	t3830056	0.602	0.13	126
Putamen	19_35534936	19_35534936	t3830064	0.511	0.132	126
Occipital cortex	19_35529792	19_35529792	t3830060	0.717	0.133	127
Occipital cortex	19_35534508	19_35534508	t3830043	0.147	0.135	127
Putamen	19_35534936	19_35534936	t3830055	0.548	0.136	126
Occipital cortex	19_35534508	19_35534508	t3830044	0.333	0.136	127
Putamen	19_35534936	19_35534936	t3830052	-0.347	0.139	126
Occipital cortex	19_35529792	19_35529792	t3830064	0.605	0.14	127
Putamen	19_35534936	19_35534936	t3830057	0.459	0.143	126
White matter	19_35530138	19_35530138	t3830064	0.422	0.146	128
Occipital cortex	19_35529792	19_35529792	t3830054	0.589	0.146	127
Occipital cortex	19_35534936	19_35534936	t3830042	0.294	0.146	127
Putamen	19_35534508	19_35534508	t3830071	-0.434	0.147	126
Occipital cortex	19_35534936	19_35534936	t3830069	0.572	0.152	127
Occipital cortex	19_35534936	19_35534936	t3830072	-0.611	0.155	127
Putamen	19_35530781	19_35530781	t3830056	0.381	0.157	126
White matter	19_35534508	19_35534508	t3830060	-0.524	0.163	128
White matter	19_35530781	19_35530781	t3830062	-0.261	0.165	128
Putamen	19_35534508	19_35534508	t3830069	-0.415	0.169	126
White matter	19_35529792	19_35529792	t3830062	-0.404	0.169	128
Occipital cortex	19_35534508	19_35534508	t3830054	-0.441	0.174	127
Putamen	19_35534508	19_35534508	t3830068	-0.193	0.178	126
Occipital cortex	19_35530781	19_35530781	t3830044	0.252	0.179	127
Putamen	19_35534936	19_35534936	t3830062	0.394	0.183	126
Putamen	19_35529792	19_35529792	t3830064	-0.416	0.184	126
Occipital cortex	19_35530138	19_35530138	t3830045	0.337	0.19	127
Putamen	19_35534936	19_35534936	t3830054	0.537	0.192	126
Occipital cortex	19_35530781	19_35530781	t3830070	-0.266	0.193	127
White matter	19_35530781	19_35530781	t3830070	0.223	0.195	128
White matter	19_35530138	19_35530138	t3830072	0.434	0.198	128
Putamen	19_35534936	19_35534936	t3830053	0.353	0.2	126
White matter	19_35529792	19_35529792	t3830061	-0.41	0.201	128
Occipital cortex	19_35529792	19_35529792	t3830062	0.451	0.201	127
Putamen	19_35530781	19_35530781	t3830055	-0.29	0.206	126
Occipital cortex	19_35530781	19_35530781	t3830060	0.402	0.209	127
Occipital cortex	19_35534508	19_35534508	t3830070	-0.302	0.215	127
Putamen	19_35534508	19_35534508	t3830053	-0.25	0.221	126
White matter	19_35529792	19_35529792	t3830053	-0.255	0.221	128
Occipital cortex	19_35534936	19_35534936	t3830061	-0.408	0.221	127
White matter	19_35530781	19_35530781	t3830071	0.234	0.223	128
Putamen	19_35534508	19_35534508	t3830059	0.377	0.224	126
Occipital cortex	19_35534508	19_35534508	t3830053	-0.252	0.224	127
White matter	19_35534508	19_35534508	t3830056	0.373	0.228	128
White matter	19_35530138	19_35530138	t3830054	0.375	0.245	128
White matter	19_35529792	19_35529792	t3830043	0.154	0.251	128
Occipital cortex	19_35534508	19_35534508	t3830059	0.305	0.252	127
Putamen	19_35529792	19_35529792	t3830055	-0.387	0.254	126
Occipital cortex	19_35534508	19_35534508	t3830060	-0.436	0.254	127
Occipital cortex	19_35529792	19_35529792	t3830043	0.139	0.259	127
Occipital cortex	19_35534508	19_35534508	t3830064	-0.37	0.26	127
White matter	19_35534508	19_35534508	t3830069	-0.309	0.261	128
Occipital cortex	19_35534936	19_35534936	t3830052	0.29	0.262	127
Putamen	19_35530781	19_35530781	t3830054	-0.286	0.266	126
White matter	19_35530138	19_35530138	t3830062	0.275	0.267	128
Putamen	19_35530781	19_35530781	t3830069	0.281	0.268	126
Occipital cortex	19_35530781	19_35530781	t3830053	0.191	0.272	127
Occipital cortex	19_35529792	19_35529792	t3830070	-0.334	0.273	127
White matter	19_35534508	19_35534508	t3830070	-0.229	0.274	128
Putamen	19_35534936	19_35534936	t3830061	0.362	0.275	126
Occipital cortex	19_35530138	19_35530138	t3830060	0.447	0.275	127
White matter	19_35529792	19_35529792	t3830060	-0.521	0.28	128
White matter	19_35534508	19_35534508	t3830053	-0.171	0.294	128
Occipital cortex	19_35534936	19_35534936	t3830044	0.32	0.295	127
White matter	19_35534508	19_35534508	t3830071	0.245	0.296	128
Occipital cortex	19_35530781	19_35530781	t3830071	0.197	0.298	127
White matter	19_35530138	19_35530138	t3830071	0.262	0.301	128
Occipital cortex	19_35534508	19_35534508	t3830071	-0.233	0.304	127
White matter	19_35534936	19_35534936	t3830042	0.223	0.309	128
Putamen	19_35530138	19_35530138	t3830072	0.34	0.314	126
Putamen	19_35534936	19_35534936	t3830070	0.346	0.314	126
Putamen	19_35530138	19_35530138	t3830068	0.155	0.316	126
White matter	19_35534508	19_35534508	t3830072	0.313	0.316	128
Putamen	19_35529792	19_35529792	t3830061	-0.302	0.323	126
Occipital cortex	19_35530138	19_35530138	t3830055	0.287	0.325	127
Occipital cortex	19_35530138	19_35530138	t3830054	0.341	0.326	127
White matter	19_35530781	19_35530781	t3830059	-0.239	0.332	128
Occipital cortex	19_35530138	19_35530138	t3830070	-0.249	0.34	127
White matter	19_35534508	19_35534508	t3830064	-0.255	0.345	128
Putamen	19_35534936	19_35534936	t3830056	-0.407	0.347	126
White matter	19_35534936	19_35534936	t3830052	-0.261	0.348	128
Putamen	19_35534508	19_35534508	t3830072	0.29	0.354	126
Occipital cortex	19_35534508	19_35534508	t3830045	-0.223	0.356	127
Occipital cortex	19_35530138	19_35530138	t3830059	-0.261	0.359	127
Putamen	19_35530781	19_35530781	t3830068	0.11	0.362	126
White matter	19_35534936	19_35534936	t3830054	0.367	0.365	128
Occipital cortex	19_35534936	19_35534936	t3830053	0.249	0.38	127
Putamen	19_35534508	19_35534508	t3830070	-0.221	0.387	126
Occipital cortex	19_35529792	19_35529792	t3830069	-0.314	0.393	127
Occipital cortex	19_35529792	19_35529792	t3830053	0.222	0.394	127
Putamen	19_35529792	19_35529792	t3830043	-0.132	0.395	126
Occipital cortex	19_35529792	19_35529792	t3830072	0.334	0.398	127
White matter	19_35530781	19_35530781	t3830055	-0.194	0.4	128
White matter	19_35534936	19_35534936	t3830045	-0.25	0.4	128
Putamen	19_35530138	19_35530138	t3830070	-0.228	0.407	126
Putamen	19_35529792	19_35529792	t3830060	-0.355	0.408	126
Occipital cortex	19_35530781	19_35530781	t3830055	0.188	0.41	127
White matter	19_35530781	19_35530781	t3830060	-0.254	0.411	128
White matter	19_35530781	19_35530781	t3830056	-0.209	0.412	128
Putamen	19_35534936	19_35534936	t3830069	0.331	0.416	126
White matter	19_35530781	19_35530781	t3830072	-0.207	0.419	128
Occipital cortex	19_35530138	19_35530138	t3830062	0.239	0.43	127
Putamen	19_35530138	19_35530138	t3830042	-0.128	0.441	126
Putamen	19_35530138	19_35530138	t3830045	0.187	0.444	126
White matter	19_35530781	19_35530781	t3830064	-0.169	0.446	128
White matter	19_35529792	19_35529792	t3830054	-0.292	0.447	128
Putamen	19_35534508	19_35534508	t3830061	-0.185	0.452	126
White matter	19_35530138	19_35530138	t3830061	0.204	0.452	128
Occipital cortex	19_35534508	19_35534508	t3830069	-0.218	0.457	127
White matter	19_35534936	19_35534936	t3830069	-0.276	0.46	128
Occipital cortex	19_35534936	19_35534936	t3830054	0.326	0.462	127
White matter	19_35530781	19_35530781	t3830044	-0.148	0.466	128
Putamen	19_35534508	19_35534508	t3830062	-0.159	0.468	126
White matter	19_35534508	19_35534508	t3830061	0.182	0.468	128
Occipital cortex	19_35534936	19_35534936	t3830068	0.139	0.482	127
Putamen	19_35530781	19_35530781	t3830045	0.132	0.486	126
White matter	19_35529792	19_35529792	t3830045	-0.195	0.488	128
Putamen	19_35529792	19_35529792	t3830054	-0.255	0.502	126
White matter	19_35530781	19_35530781	t3830068	-0.0754	0.502	128
White matter	19_35534508	19_35534508	t3830044	0.166	0.503	128
White matter	19_35534936	19_35534936	t3830064	-0.243	0.506	128
Occipital cortex	19_35534508	19_35534508	t3830056	0.185	0.506	127
Putamen	19_35530781	19_35530781	t3830053	-0.114	0.508	126
Putamen	19_35534508	19_35534508	t3830056	-0.212	0.51	126
Putamen	19_35530781	19_35530781	t3830059	-0.171	0.512	126
Putamen	19_35534508	19_35534508	t3830055	-0.179	0.512	126
White matter	19_35530138	19_35530138	t3830059	-0.212	0.513	128
White matter	19_35534936	19_35534936	t3830053	0.143	0.518	128
White matter	19_35529792	19_35529792	t3830059	-0.247	0.522	128
White matter	19_35530138	19_35530138	t3830060	0.258	0.525	128
White matter	19_35530781	19_35530781	t3830054	-0.155	0.527	128
Occipital cortex	19_35530781	19_35530781	t3830062	0.145	0.539	127
Putamen	19_35530138	19_35530138	t3830044	-0.161	0.543	126
Occipital cortex	19_35529792	19_35529792	t3830052	0.144	0.543	127
Occipital cortex	19_35530781	19_35530781	t3830061	-0.12	0.558	127
Occipital cortex	19_35530138	19_35530138	t3830056	0.168	0.574	127
White matter	19_35530781	19_35530781	t3830053	-0.0743	0.578	128
Putamen	19_35529792	19_35529792	t3830069	-0.206	0.584	126
White matter	19_35534936	19_35534936	t3830062	-0.17	0.584	128
Occipital cortex	19_35529792	19_35529792	t3830068	-0.0977	0.591	127
Putamen	19_35534508	19_35534508	t3830042	0.0822	0.594	126
Occipital cortex	19_35534936	19_35534936	t3830056	-0.197	0.605	127
Occipital cortex	19_35530781	19_35530781	t3830056	0.12	0.607	127
Putamen	19_35530781	19_35530781	t3830062	-0.0918	0.619	126
Occipital cortex	19_35530138	19_35530138	t3830057	-0.133	0.62	127
Occipital cortex	19_35530781	19_35530781	t3830059	-0.111	0.62	127
Occipital cortex	19_35530138	19_35530138	t3830061	-0.129	0.623	127
White matter	19_35534936	19_35534936	t3830043	-0.0697	0.624	128
Occipital cortex	19_35534936	19_35534936	t3830070	0.163	0.624	127
Putamen	19_35529792	19_35529792	t3830059	-0.186	0.629	126
Putamen	19_35534936	19_35534936	t3830071	0.194	0.632	126
Occipital cortex	19_35530138	19_35530138	t3830068	-0.074	0.634	127
Putamen	19_35529792	19_35529792	t3830062	0.129	0.637	126
Putamen	19_35534936	19_35534936	t3830072	0.199	0.637	126
Putamen	19_35529792	19_35529792	t3830053	-0.119	0.641	126
Occipital cortex	19_35530781	19_35530781	t3830054	0.127	0.642	127
White matter	19_35529792	19_35529792	t3830070	-0.124	0.646	128
White matter	19_35530138	19_35530138	t3830043	0.0519	0.647	128
White matter	19_35529792	19_35529792	t3830064	-0.157	0.65	128
White matter	19_35529792	19_35529792	t3830056	0.179	0.653	128
Putamen	19_35529792	19_35529792	t3830057	0.13	0.655	126
White matter	19_35534508	19_35534508	t3830068	0.0609	0.656	128
Occipital cortex	19_35530138	19_35530138	t3830042	-0.071	0.656	127
Putamen	19_35530138	19_35530138	t3830057	0.111	0.659	126
Occipital cortex	19_35534936	19_35534936	t3830055	-0.163	0.661	127
Occipital cortex	19_35530138	19_35530138	t3830043	-0.0452	0.669	127
Putamen	19_35534936	19_35534936	t3830059	0.178	0.67	126
Occipital cortex	19_35534936	19_35534936	t3830043	0.0562	0.676	127
Putamen	19_35530138	19_35530138	t3830056	0.143	0.679	126
White matter	19_35534508	19_35534508	t3830054	-0.123	0.68	128
Putamen	19_35530781	19_35530781	t3830052	-0.0604	0.681	126
White matter	19_35530138	19_35530138	t3830056	0.135	0.687	128
White matter	19_35530138	19_35530138	t3830068	0.0593	0.688	128
Putamen	19_35534508	19_35534508	t3830057	-0.0919	0.694	126
Occipital cortex	19_35534508	19_35534508	t3830052	-0.0722	0.704	127
Occipital cortex	19_35534936	19_35534936	t3830071	0.117	0.705	127
Occipital cortex	19_35529792	19_35529792	t3830042	-0.0698	0.707	127
White matter	19_35530138	19_35530138	t3830070	0.0832	0.714	128
Putamen	19_35530781	19_35530781	t3830061	0.0754	0.716	126
Putamen	19_35534936	19_35534936	t3830068	0.0688	0.723	126
White matter	19_35529792	19_35529792	t3830042	0.0704	0.735	128
Putamen	19_35529792	19_35529792	t3830045	0.0942	0.738	126
White matter	19_35529792	19_35529792	t3830052	0.0884	0.738	128
Putamen	19_35529792	19_35529792	t3830044	-0.102	0.739	126
Putamen	19_35530781	19_35530781	t3830072	0.0863	0.743	126
Occipital cortex	19_35534508	19_35534508	t3830072	0.104	0.743	127
Putamen	19_35530781	19_35530781	t3830070	-0.0701	0.744	126
Occipital cortex	19_35530781	19_35530781	t3830069	0.0803	0.744	127
Occipital cortex	19_35534936	19_35534936	t3830060	0.165	0.752	127
Putamen	19_35530781	19_35530781	t3830042	0.0407	0.753	126
Occipital cortex	19_35529792	19_35529792	t3830059	0.105	0.753	127
Putamen	19_35530138	19_35530138	t3830060	0.116	0.756	126
Occipital cortex	19_35534936	19_35534936	t3830045	0.102	0.758	127
Occipital cortex	19_35529792	19_35529792	t3830057	0.0946	0.762	127
Occipital cortex	19_35530781	19_35530781	t3830052	0.048	0.763	127
Putamen	19_35530138	19_35530138	t3830062	0.0702	0.767	126
Putamen	19_35529792	19_35529792	t3830070	-0.0934	0.769	126
White matter	19_35529792	19_35529792	t3830057	0.108	0.772	128
Occipital cortex	19_35529792	19_35529792	t3830056	0.0998	0.775	127
Putamen	19_35530781	19_35530781	t3830064	-0.0603	0.777	126
Putamen	19_35530781	19_35530781	t3830060	-0.0807	0.781	126
White matter	19_35530781	19_35530781	t3830043	0.023	0.789	128
Putamen	19_35530138	19_35530138	t3830052	-0.05	0.791	126
Putamen	19_35529792	19_35529792	t3830072	0.102	0.793	126
White matter	19_35530138	19_35530138	t3830053	0.045	0.798	128
Occipital cortex	19_35530138	19_35530138	t3830071	-0.0609	0.802	127
Putamen	19_35534508	19_35534508	t3830052	-0.0427	0.807	126
Occipital cortex	19_35530781	19_35530781	t3830057	-0.0509	0.808	127
Putamen	19_35530781	19_35530781	t3830044	0.046	0.824	126
White matter	19_35534936	19_35534936	t3830055	0.0834	0.827	128
Occipital cortex	19_35529792	19_35529792	t3830061	-0.0667	0.827	127
Putamen	19_35530138	19_35530138	t3830064	0.0571	0.834	126
White matter	19_35529792	19_35529792	t3830068	-0.0341	0.846	128
Putamen	19_35534936	19_35534936	t3830043	0.0315	0.851	126
Putamen	19_35530138	19_35530138	t3830043	0.0252	0.852	126
White matter	19_35534936	19_35534936	t3830044	0.0625	0.852	128
Putamen	19_35530138	19_35530138	t3830054	0.0568	0.864	126
White matter	19_35534508	19_35534508	t3830045	-0.0366	0.868	128
Occipital cortex	19_35530138	19_35530138	t3830072	-0.0562	0.868	127
Putamen	19_35534936	19_35534936	t3830045	-0.0428	0.888	126
Putamen	19_35530138	19_35530138	t3830053	0.0306	0.89	126
Putamen	19_35530138	19_35530138	t3830069	0.0443	0.892	126
Occipital cortex	19_35534508	19_35534508	t3830042	0.0201	0.892	127
White matter	19_35530781	19_35530781	t3830052	0.0215	0.899	128
Putamen	19_35530138	19_35530138	t3830055	0.0372	0.9	126
Occipital cortex	19_35534936	19_35534936	t3830057	-0.0422	0.902	127
Occipital cortex	19_35534508	19_35534508	t3830068	0.0155	0.915	127
White matter	19_35534936	19_35534936	t3830056	-0.0412	0.922	128
Occipital cortex	19_35529792	19_35529792	t3830045	0.0273	0.928	127
White matter	19_35530781	19_35530781	t3830042	0.0119	0.929	128
Putamen	19_35529792	19_35529792	t3830068	0.0158	0.93	126
Putamen	19_35534508	19_35534508	t3830054	-0.0257	0.933	126
Putamen	19_35530781	19_35530781	t3830043	0.00795	0.94	126
White matter	19_35530781	19_35530781	t3830069	0.0156	0.945	128
White matter	19_35534936	19_35534936	t3830068	-0.0114	0.951	128
White matter	19_35530781	19_35530781	t3830045	0.00994	0.956	128
White matter	19_35534936	19_35534936	t3830060	-0.0281	0.956	128
White matter	19_35534936	19_35534936	t3830072	-0.0234	0.956	128
White matter	19_35534936	19_35534936	t3830061	0.0168	0.961	128
Occipital cortex	19_35529792	19_35529792	t3830071	0.0121	0.966	127
White matter	19_35529792	19_35529792	t3830071	-0.0103	0.973	128
White matter	19_35534936	19_35534936	t3830057	-0.0126	0.974	128
Putamen	19_35530138	19_35530138	t3830059	0.00986	0.977	126
White matter	19_35530781	19_35530781	t3830057	0.00647	0.978	128
Occipital cortex	19_35534936	19_35534936	t3830064	0.0124	0.978	127
Putamen	19_35534508	19_35534508	t3830060	0.00894	0.979	126
White matter	19_35530138	19_35530138	t3830044	0.00596	0.982	128
Occipital cortex	19_35534508	19_35534508	t3830061	0.00445	0.986	127
White matter	19_35534508	19_35534508	t3830042	-0.00185	0.991	128
Occipital cortex	19_35534936	19_35534936	t3830062	0.00421	0.991	127
Putamen	19_35534508	19_35534508	t3830064	0.00205	0.994	126
White matter	19_35529792	19_35529792	t3830055	-0.000979	0.998	128
